# Supplementary material for: Oligodendrocyte-lineage cell exocytosis and L-type prostaglandin D synthase promote oligodendrocyte development and myelination
Source: eLife. 2023 Feb 13;12:e77441. doi: 10.7554/eLife.77441 (PMC9946447; doi:10.7554/eLife.77441)
Supplement: Figure 1—figure supplement 2—source data 1. [file elife-77441-fig1-figsupp2-data1.xlsx]

## Sheet: Sheet1
Figure 1-figure supplement 2-source data 1
	Figure 1-figure supplement 2B			Figure 1-figure supplement 2C
	GFP+PD+/GFP+%	GFP+Olig2+/GFP+%		GFP+Pdgfra+/pdgfra+%	GFP+Olig2+/Olig2+%
	50.9743	89.1816		36.8306	40.5141
	64.4231	91.6667		44.2724	28.5714
	68.2692	85.1852		44.664	20.7207
