# Supplementary material for: Oligodendrocyte-lineage cell exocytosis and L-type prostaglandin D synthase promote oligodendrocyte development and myelination
Source: eLife. 2023 Feb 13;12:e77441. doi: 10.7554/eLife.77441 (PMC9946447; doi:10.7554/eLife.77441)
Supplement: Figure 1—figure supplement 3—source data 1. [file elife-77441-fig1-figsupp3-data1.xlsx]

## Sheet: Sheet1
Figure 1-figure supplement 3-source data 1
	Figure 1-figure supplement 3B			Figure 1-figure supplement 3C
	Ctrl	PD:ibot		Ctrl	PD:ibot
	0.893318	365.369		0.229192	141.019
	0	240.374		0.49477	120.187
	0	298.064		0	136.212
	0	346.139		0.575158
	0.235398	365.369
	0.40251
