# Supplementary material for: Oligodendrocyte-lineage cell exocytosis and L-type prostaglandin D synthase promote oligodendrocyte development and myelination
Source: eLife. 2023 Feb 13;12:e77441. doi: 10.7554/eLife.77441 (PMC9946447; doi:10.7554/eLife.77441)
Supplement: Figure 1—source data 1. [file elife-77441-fig1-data1.xlsx]

## Sheet: Sheet1
Figure 1-source data 1
	Figure 1A								Figure 1B								Figure 1C								Figure 1F			Figure 1G							Figure 1K			Figure 1L			Figure 1M
	OPC	NFO	MO	neuron	Astrocyte	Microglia	Endothelia		OPC	NFO	MO	neuron	Astrocyte	Microglia	Endothelia		OPC	NFO	MO	neuron	Astrocyte	Microglia	Endothelia		GFP+Pdgfra+/GFP+%	GFP+Olig2+/GFP+%		GFP+Pdgfra+/pdgfra+%			GFP+Olig2+/Olig2+%				Ctrl	PD:ibot		Ctrl	PD:ibot		Ctrl	PD:ibot
	2.8	3	3.9	6.8	2.7	2.5	0.6		75.5	79.7	81.3	298.7	73.9	53.3	17.8		46.9	88.1	96.4	11.7	27.2	52	106.2		96.0864	97.0861		Ctx	CC	Str	Ctx	CC	Str		0	3.441		1.05684	0.536237		3.0221	0.249565
	1.9	3.6	5.4	6	2.7	1.9	0.8		112.7	97.9	122.2	273.2	77	66.9	16.3		51.8	94.8	110.5	16.1	35.1	32.3	111		80.3913	93.1624		90.5502	66.0232	81.6393	60.7204	59.1512	62.2222		0.1383	1.9733		0.793096	0.0237995		2.93099	0.002188
																									95.5556	88.1444		72.2222	61.9048	55.8824	69.4268	49.8266	54.4885		0	2.044		0.894429	0.249082		3.05076	0.089197
																									96.25	96.7747		74.1284	65.0735		62.6563	48.8848			0	3.22435		3.65088	0.725298		6.06838	0.626678
																												77.7628	63.4752		49.711	47.9319						2.84136	0.107787
