# Supplementary material for: Oligodendrocyte-lineage cell exocytosis and L-type prostaglandin D synthase promote oligodendrocyte development and myelination
Source: eLife. 2023 Feb 13;12:e77441. doi: 10.7554/eLife.77441 (PMC9946447; doi:10.7554/eLife.77441)
Supplement: Figure 2—source data 1. [file elife-77441-fig2-data1.xlsx]

## Sheet: Sheet1
Figure 2-source data 1
	Figure 2B							Figure 2D			Figure 2E			Figure 2G			Figure 2H			Figure 2J			Figure 2K
	P11_Ctrl	P11_PD:ibot	P15_Ctrl	P15_PD:ibot	P30_Ctrl	P30_PD:ibot		Ctrl	PD:ibot		Ctrl	PD:ibot		Ctrl	PD:ibot		Ctrl	PD:ibot		Ctrl	PD:ibot		Ctrl	PD:ibot
	11.8	3.7	97	15.7	122	68		309.929	190.668		335.316	281.233		345.5	290		151.2	180.1		50.6	12.1		46.1	4.8
	22.5	4.8	46.5	8.8	84.2	82.8		566.884	463.016		289.646	258.398		348.9	245		160.1	146.5		110	3		77.1	2.6
	17.6	10.6	43.3	6.8	75.7	42.7		432.697	346.385		376.179	388.198		278.1	236		156.6	142.5		110.1	23.9		84.7	24.4
	9.1	4.3	44.9	1.2	122.1	48.3		713.711	548.396		427.859	399.014		267	244.2		163.1	153.1		94.7	30.9		57.3	13.2
					71.2	53.4		654.979	673.285		362.959	427.859
