# Supplementary material for: Oligodendrocyte-lineage cell exocytosis and L-type prostaglandin D synthase promote oligodendrocyte development and myelination
Source: eLife. 2023 Feb 13;12:e77441. doi: 10.7554/eLife.77441 (PMC9946447; doi:10.7554/eLife.77441)
Supplement: Figure 3—figure supplement 1—source data 1. [file elife-77441-fig3-figsupp1-data1.xlsx]

## Sheet: Sheet1
Figure 3-figure supplement 1-source data 1
	Figure 3-figure supplement 1B			Figure 3-figure supplement 1C			Figure 3-figure supplement 1D			Figure 3-figure supplement 1E			Figure 3-figure supplement 1F			Figure 3-figure supplement 1G			Figure 3-figure supplement 1H			Figure 3-figure supplement 1I			Figure 3-figure supplement 1J
	Ctrl	PD:ibot		Ctrl	PD:ibot		Ctrl	PD:ibot		Ctrl	PD:ibot		Ctrl	PD:ibot		Ctrl	PD:ibot		Ctrl	PD:ibot		Ctrl	PD:ibot		Ctrl	PD:ibot
	8.47387	5.25434		2.76224	4.79749		0.273446	1.28351		1.17241	0.252491		0.732756	0.757474		0.732756	0		0.097321	0.170688		0.486604	0.341375		0.141643	0.178412
	5.23623	3.88708		4.24381	3.26577		0.730987	0.19268		1.14678	0.398043		1.2742	0.663405		0.382259	0		0.20597	0.926711		0.514925	0.926711		0.164564	0.49597
	3.2599	3.66583		5.45374	3.9456		0.196029	0.64029		0.478633	0.66778		0.159544	0.66778		0	0.166945		0.521847	0.058671		0.434872	0.234685		0.406872	0.061576
	2.2105	4.63577		3.77051	5.38399		0.124591	0.748222		0.792742	0.418273		0.634194	0.139424		0	0		0.090934	0.90173		0.181868	0.327902		0.105764	0.476397
