# Supplementary material for: Oligodendrocyte-lineage cell exocytosis and L-type prostaglandin D synthase promote oligodendrocyte development and myelination
Source: eLife. 2023 Feb 13;12:e77441. doi: 10.7554/eLife.77441 (PMC9946447; doi:10.7554/eLife.77441)
Supplement: Figure 3—figure supplement 2—source data 1. [file elife-77441-fig3-figsupp2-data1.xlsx]

## Sheet: Sheet1
Figure 3-figure supplement 2-source data
	Figure 3-figure supplement 2A				Figure 3-figure supplement 2B
	GFP+Pdgfrα-Olig2+/Pdgfrα-Olig2+%		GFP+CC1+/CC1+%		GFP+CC1+/GFP+Oig2+%	GFP-CC1+/GFP+Oig2+%	CC1+/Olig2+%
	P8	P30	P30		16.5491	26.4917	19.7313
	16.129	34.5	31.5069		16.5083	25.6365	31.5356
	5.14706	33.1325	24.375		12.6221	18.87	43.8691
	6.54762	27.6316	13.4832
	6.4	25.1429
	6.49351	23.5632
