# Supplementary material for: Oligodendrocyte-lineage cell exocytosis and L-type prostaglandin D synthase promote oligodendrocyte development and myelination
Source: eLife. 2023 Feb 13;12:e77441. doi: 10.7554/eLife.77441 (PMC9946447; doi:10.7554/eLife.77441)
Supplement: Figure 3—figure supplement 3—source data 1. [file elife-77441-fig3-figsupp3-data1.xlsx]

## Sheet: Sheet1
Figure 3-figure supplement 3-source data 1
	Figure 3-figure supplement 3B
	Ctrl	PD:ibot
	3.6	11.1
	0.8	5.9
	4.4	6.2
	2.8	16.8
	13	33.2
