# Supplementary material for: Oligodendrocyte-lineage cell exocytosis and L-type prostaglandin D synthase promote oligodendrocyte development and myelination
Source: eLife. 2023 Feb 13;12:e77441. doi: 10.7554/eLife.77441 (PMC9946447; doi:10.7554/eLife.77441)
Supplement: Figure 3—source data 1. [file elife-77441-fig3-data1.xlsx]

## Sheet: Sheet1
Figure 3-source data 1
	Figure 3E			Figure 3F			Figure 3G			Figure 3H			Figure 3K													Figure 3L			Figure 3M			Figure 3N			Figure 3O				Figure 3P							Figure 3Q			Figure 3R
	Ctrl	PD:ibot		Ctrl	PD:ibot		Ctrl	PD:ibot		Ctrl	PD:ibot		Ctrl_rep1_axon diameter	Ctrl_rep1_g-ratio	PD:ibot_rep1_axon diameter	PD:ibot_rep1_g-ratio	Ctrl_rep2_axon diameter	Ctrl_rep2_g-ratio	PD:ibot_rep2_axon diameter	PD:ibot_rep2_g-ratio	Ctrl_rep3_axon diameter	Ctrl_rep3_g-ratio	PD:ibot_rep3_axon diameter	PD:ibot_rep3_g-ratio		Ctrl	PD:ibot		Ctrl	PD:ibot		Ctrl	PD:ibot		Ctrl	PD:ibot			Ctrl_day1	Ctrl_day2	Ctrl_day3	PD:ibot_day1	PD:ibot_day2	PD:ibot_day3		Ctrl	PD:ibot		Ctrl
	0.155	0.13525		3.5195	1.46375		25.1482	1.823		80	44		1.03109	0.773948	1.62071	0.94749	1.40618	0.84287	2.13678	0.92767	1.18721	0.837568	1.22105	0.936214		8.82401	2.52828		0.848946	0.919		8.50667	5.01147		252.502	347.573			84.7	98.2	109.7	64.5	71.6	65.5		84.7	64.5		98.2
	2.4875	0.475		24.367	6.025		33.044	24.1935		95	83.81		0.734747	0.853535	1.20001	0.926698	1.36576	0.860174	1.87052	0.940152	1.60095	0.899672	1.40754	0.932349		7.47713	2.30583		0.82386	0.92		8.949	3.35171		221.764	366.039			90.4	99.3	109	111	98.8	79.9		90.4	111		99.3
	1.5475	0.024		5.8975	0.182		29.6065	11.257		96	62.26		0.769452	0.868833	0.796287	0.918732	1.1813	0.831292	0.998472	0.934296	1.85789	0.864909	1.84517	0.93404		6.35593	1.23839		0.851	0.922		3.34777	4.22772		415.398	305.924			101.8	118.4	131.3	77.9	92.7	86.1		101.8	77.9		118.4
	0.3	0.0365		5.85	0.5745		35.3145	7.5505		88	63.43		1.10673	0.862558	1.32025	0.952483	0.892775	0.853175	2.08093	0.932403	3.35206	0.846801	1.55085	0.898287								4.10407	2.90132		346.833	379.619			69.1	108.9	102	26.3	110	98.1		69.1	26.3		108.9
	1.4595	0.157		22.042	3.161		32.2	12.99		67	61.82		1.09284	0.907087	0.940015	0.958118	0.874767	0.83988	1.75825	0.917226	1.46906	0.875173	1.17265	0.922895															99.1	125.7	120.3	104.1	77.9	57.7		99.1	104.1		125.7
	1.0255	0.419		8.699	2.156		19.97	11.49		87	84.33		0.699231	0.870285	1.11988	0.929127	0.780134	0.795684	1.5231	0.91421	1.42283	0.84364	1.10903	0.904024															118	96.4	118.7	65.9	55.3	96.3		118	65.9		96.4
													0.825338	0.870512	0.745072	0.928256	0.900585	0.801739	0.935943	0.904474	1.35875	0.852536	1.1915	0.935519															107.9	85.4	122	88.9	99.9	112.7		107.9	88.9		85.4
													0.667558	0.862949	1.03786	0.915671	1.56678	0.82995	3.49215	0.935555	2.57656	0.849389	1.29788	0.88114															114	92.7	116.4	106.9	95	96.8		114	106.9		92.7
													0.603446	0.831157	1.64294	0.924761	0.839108	0.795894	1.04459	0.913049	2.81145	0.797782	1.43929	0.877286															97.5	72.2	125.7	78	99.8	78.4		97.5	78		72.2
													0.724275	0.805493	1.18399	0.85503	1.10673	0.828054	1.17156	0.89393	1.09633	0.845026	1.89453	0.910158															107.9	84.7	100	61.7667	66.7	73.0333		107.9	61.7667		84.7
													0.862306	0.864178	0.736478	0.884111	1.00038	0.841113	1.40889	0.938505	1.18614	0.796905	1.12669	0.939309															85.7	113.7	125	78.6333	90.1	101.233		85.7	78.6333		113.7
													0.861568	0.851542	1.30571	0.905241	0.811335	0.767358	1.56108	0.966496	3.24102	0.870428	1.04642	0.913757															69.2333	77.3	77.4333	46.3333	48.6667	69.0333		69.2333	46.3333		77.3
													0.975249	0.816679	1.40074	0.92655	0.965407	0.841386	2.91113	0.954415	1.50079	0.824854	1.18989	0.937948															71.1	106.667	96.8667	63.7	87.5	72.7		71.1	63.7		106.667
													0.809764	0.862059	0.9167	0.885878	0.977856	0.859752	2.2711	0.961052	1.76078	0.842195	1.63362	0.925316															108.3	143	117.7	70.8	54.7	63.4		108.3	70.8		143
													0.623168	0.809016	0.972634	0.947854	0.650166	0.82146	1.38382	0.937834	1.63557	0.840934	1.65337	0.932325															67.8	98	80.3	91.1	121.5	85		67.8	91.1		98
													0.893488	0.883641	0.885616	0.932768	0.89917	0.869455	1.74261	0.94958	2.19179	0.898942	1.98415	0.937901															127.3	137	137	73.1	92.7	116.8		127.3	73.1		137
													0.827649	0.892109	0.70105	0.951895	1.38059	0.83913	1.08641	0.925179	2.03453	0.861729	1.08171	0.90543															72.7	93.6	97.1	92.8	125	126.7		72.7	92.8		93.6
													0.658919	0.905379	0.888487	0.946548	1.0543	0.877019	1.0555	0.919018	2.47756	0.845493	2.31524	0.923348															80	80.3	78.1	76.4	88.4	88.8		80	76.4		80.3
													1.10788	0.896662	1.50882	0.944101	1.32747	0.845722	1.09167	0.774845	0.836828	0.823514	1.52394	0.922144															65	82.5	84.9	58.5	81.5	88.1		65	58.5		82.5
													0.771105	0.832393	1.32507	0.932167	1.00419	0.814102	1.417	0.88731	1.50756	0.847021	2.37684	0.932281															100.4	126.5	107.1	97.1	120.1	110.7		100.4	97.1		126.5
													1.03233	0.868754	1.37782	0.936514	1.26459	0.860055	1.81069	0.914649	1.32699	0.831565	2.11342	0.927143															81.7	83.3	105.3					81.7			83.3
													1.22417	0.896639	1.07581	0.881432	1.05309	0.745784	1.57771	0.945905	1.51514	0.842687	1.78162	0.930551															91.1	73.3	80.1					91.1			73.3
													0.680778	0.783472	0.922239	0.899832	1.01679	0.820889	2.06589	0.92768	2.05848	0.893354	1.10846	0.947898															85.5	100.3	89.2					85.5			100.3
													0.836067	0.81134	1.15238	0.882575	1.05972	0.747383	2.15813	0.933582	1.93838	0.879734	1.74224	0.943161															84	99.05	98					84			99.05
													1.19842	0.82934	0.779317	0.92707	1.9209	0.87909	1.84448	0.927209	2.46958	0.772631	1.00293	0.904326															97.4	123.5	129					97.4			123.5
													1.59017	0.838605	0.400535	0.866025	1.42507	0.882501	1.65568	0.909463	3.78352	0.914588	1.06988	0.942984															92.5333	97.55	98.3					92.5333			97.55
													0.993358	0.870388			0.782578	0.854338	1.76979	0.93234	2.81779	0.887173	0.84666	0.927823															98.4	112.5	116.2					98.4			112.5
													0.845908	0.838677			1.01429	0.778265	0.9339	0.889378			1.34509	0.924381
													0.775222	0.869022			0.971979	0.857544	2.85928	0.913535			1.65106	0.893135
													0.852655	0.862258			1.20478	0.800956	1.48243	0.918476
													0.561928	0.838182			1.37505	0.814579	0.338514	0.813489
													1.03541	0.870561			1.09865	0.808296	1.31251	0.93249
													0.748482	0.803809			1.18614	0.718747	1.28308	0.941072
													0.850412	0.803859			1.08934	0.81129	1.33082	0.921243
													0.911825	0.820908			1.37598	0.83261	1.42819	0.91703
													0.670413	0.838563			1.64604	0.872403	1.682	0.910043
													0.658919	0.825008			0.529257	0.740695	1.44635	0.92699
													1.22885	0.870533			1.14072	0.742456	1.20742	0.945059
																	1.33607	0.811496	1.88274	0.918219
																	0.950789	0.768878	1.52769	0.91823
																	0.864518	0.825212	2.09648	0.942748
																	1.73492	0.788218	1.69633	0.893637
																	1.51766	0.873297
																	1.06928	0.852717
																	1.59497	0.908449
																	0.857123	0.808823
																	0.876221	0.861219
[truncated: 3 more columns]
