# Supplementary material for: Oligodendrocyte-lineage cell exocytosis and L-type prostaglandin D synthase promote oligodendrocyte development and myelination
Source: eLife. 2023 Feb 13;12:e77441. doi: 10.7554/eLife.77441 (PMC9946447; doi:10.7554/eLife.77441)
Supplement: Figure 4—figure supplement 1—source data 1. [file elife-77441-fig4-figsupp1-data1.xlsx]

## Sheet: Sheet1
Figure 4-figure supplement 1-source data 1
	Figure 4-figure supplement 1A			Figure 4-figure supplement 1B			Figure 4-figure supplement 1C			Figure 4-figure supplement 1D			Figure 4-figure supplement 1E			Figure 4-figure supplement 1F
	Ctrl	PD:ibot		Ctrl	PD:ibot		Ctrl	PD:ibot		Ctrl	PD:ibot		Ctrl	PD:ibot		Ctrl	PD:ibot
	26.1612	26.5307		126.801	160.15		30.9082	49.7313		11.4402	10.3614		243.762	220.671		104.59	110.758
	26.0755	23.2817		113.853	127.774		23.3745	27.1315		11.0499	9.46462		198.765	181.972		82.8801	67.948
	37.5897	30.9156		68.1531	127.26		5.85662	18.1512		21.8138	14.5639		112.945	188.174		32.2345	85.0327
