# Supplementary material for: Oligodendrocyte-lineage cell exocytosis and L-type prostaglandin D synthase promote oligodendrocyte development and myelination
Source: eLife. 2023 Feb 13;12:e77441. doi: 10.7554/eLife.77441 (PMC9946447; doi:10.7554/eLife.77441)
Supplement: Figure 4—source data 1. [file elife-77441-fig4-data1.xlsx]

## Sheet: Sheet1
Figure 4-source data 1
	Figure 4E			Figure 4F			Figure 4G			Figure 4H			Figure 4M			Figure 4N			Figure 4O
	Ctrl	PD:ibot		Ctrl	PD:ibot		Ctrl	PD:ibot		Ctrl	PD:ibot		Ctrl	PD:ibot		Ctrl	PD:ibot		Ctrl	PD:ibot
	1146.18	443.183		119.34	64.4003		3.68525	0.747988		235.943	50.2201		10.3434	32.6224		3.81325	17.7731		11.3242	5.12629
	1277.28	781.594		125.733	110.311		4.66412	2.84326		232.594	127.918		19.5413	57.5977		4.66977	65.1696		13.2929	7.36359
	2333.66	963.173		160.45	94.5642		9.28824	2.50083		354.521	114.276		4.98799	22.1755		3.8658	34.2371		10.3428	5.85443
The complete differential gene expression data (Figure 4A-D) is reported in Supplementary Table 2
The complete GO terms (Figure 4I-L) is reported in Supplementary Table 3
