# Supplementary material for: Oligodendrocyte-lineage cell exocytosis and L-type prostaglandin D synthase promote oligodendrocyte development and myelination
Source: eLife. 2023 Feb 13;12:e77441. doi: 10.7554/eLife.77441 (PMC9946447; doi:10.7554/eLife.77441)
Supplement: Figure 5—figure supplement 1—source data 1. [file elife-77441-fig5-figsupp1-data1.xlsx]

## Sheet: Sheet1
Figure 5-figure supplement 1-source data 1
	Figure 5-figure supplement 1B			Figure 5-figure supplement 1C
	Ctrl	PD:ibot		Ctrl	PD:ibot
	72.3214	59.2		3579.29	2682.55
	80.625	56.383		4527.33	2866.68
	77.3	51		3199.19	2328.19
	40.9977	34.9174		2230.46	1600.72
