# Supplementary material for: Oligodendrocyte-lineage cell exocytosis and L-type prostaglandin D synthase promote oligodendrocyte development and myelination
Source: eLife. 2023 Feb 13;12:e77441. doi: 10.7554/eLife.77441 (PMC9946447; doi:10.7554/eLife.77441)
Supplement: Figure 5—source data 1. [file elife-77441-fig5-data1.xlsx]

## Sheet: Sheet1
Figure 5-source data 1
	Figure 5C			Figure 5D			Figure 5F							Figure 5G							Figure 5H
	Ctrl	PD:ibot		Ctrl	PD:ibot		Ctrl_Star	Ctrl_Arborized	Ctrl_lamellar	PD:ibot_Star	PD:ibot_Arborized	PD:ibot_lamellar		Ctrl_Star	Ctrl_Arborized	Ctrl_lamellar	PD:ibot_Star	PD:ibot_Arborized	PD:ibot_lamellar		Ctrl	PD:ibot
	3.05776	1.73243		1	0.855219		29.75	30.3	37.6	49.9	35	12.7		29.75	30.3	37.6	49.9	35	12.7		5774.75	3707.44
	5.55978	4.37318		1	0.572236		25.55	33.95	40.55	43.95	38.35	15.7		25.55	33.95	40.55	43.95	38.35	15.7		6215.75	4895.01
	7.7311	6.12395		1	0.587924		22.9503	43.8893	33.658	41.2249	51.5555	7.42795		34.5905	53.7117	10.4885	26.9117	70.431	3.50094		4969.3	3798.54
	3.63036	1.45239		1	0.885193		17.6246	25.8659	55.7412	37.8153	52.8245	8.40964		40.946	44.2	14.4541	29.1835	61.4314	8.9719		4588.91	4303.47
	5.63553	2.82324					18.1238	41.4301	41.1009	26.042	66.4055	7.35271		27.0118	42.0828	33.3257	25.4892	50.9111	22.7523		7809.57	4689.07
	2.47786	1.0851												31.2	37	33.3	54.1	27.3	18.4		8065.86	4125.87
														33.1	24.4	39.4	55.8	32.5	11
														40.8	18.4	42.4	54.7739	24.6231	22.6131
														59.6591	22.1591	19.3182	76.25	11.25	12.5
