# Supplementary material for: Oligodendrocyte-lineage cell exocytosis and L-type prostaglandin D synthase promote oligodendrocyte development and myelination
Source: eLife. 2023 Feb 13;12:e77441. doi: 10.7554/eLife.77441 (PMC9946447; doi:10.7554/eLife.77441)
Supplement: Figure 6—figure supplement 1—source data 1. [file elife-77441-fig6-figsupp1-data1.xlsx]

## Sheet: Sheet1
Figure 6-figure supplement 1-source data 1
	Figure 6-figure supplement 1D
	Group 1	Group 2	Group 3	Group 4
	4023.38	3421.76	2077.61	3200.56
	4436.37	4126.65	2398.95	2907.14
	3176.23	3061.83	2161.46	2421.42
	2922.71	2623.12	2094.64	2136.07
	2586.85	2792.42	1987.29	2216.19
	1844.81	2112.68	1294.08	1478.51
	2217.18	2886.13	1826.84	1636.79
