# Supplementary material for: Oligodendrocyte-lineage cell exocytosis and L-type prostaglandin D synthase promote oligodendrocyte development and myelination
Source: eLife. 2023 Feb 13;12:e77441. doi: 10.7554/eLife.77441 (PMC9946447; doi:10.7554/eLife.77441)
Supplement: Figure 6—source data 1. [file elife-77441-fig6-data1.xlsx]

## Sheet: Sheet1
Figure 6-source data 1
	Figure 6B		Figure 6C			Figure 6D			Figure 6H
	54.3		Ctrl cells in ctrl wells	Ctrl cells in PD:ibot wells		Ctrl cells in ctrl wells	Ctrl cells in PD:ibot wells		Group 1	Group 2	Group 3	Group 4
	92.4		22.7273	3.9855		5774.75	4120.42		4156.01	3826.01	2983.62	3267.74
	88.5		26.3095	2.0408		6215.75	5116.57		4640.96	3863.04	2181.03	3974.56
	44.3		9.61969	2.8832		4969.3	3926.44		5960.98	7914.22	4673.02	4980.01
	60.9756		24.8	17.969		4588.91	4257.95		6541.41	6755.15	4494.53	5170.03
	48.8216		15.3409	7.2368		7937.72	5177.59		6479.86	8710.52	4561.65	5220.24
									7315.76	7927.59	5206.05	5653.03
									4672.27	3872.3	3391.58	4708.65
									5757.35	5825.18	2985.38	3777.17
