# Supplementary material for: Oligodendrocyte-lineage cell exocytosis and L-type prostaglandin D synthase promote oligodendrocyte development and myelination
Source: eLife. 2023 Feb 13;12:e77441. doi: 10.7554/eLife.77441 (PMC9946447; doi:10.7554/eLife.77441)
Supplement: Figure 6—source data 2. [file elife-77441-fig6-data2.xlsx]

## Sheet: Sheet1
Figure 6-source data 2
	Figure 6F
	Group	Well	Insert
	1	Ctrl	Ctrl
	2	Ctrl	PD:ibot
	3	PD:ibot	PD:ibot
	4	PD:ibot	Ctrl
