# Supplementary material for: Oligodendrocyte-lineage cell exocytosis and L-type prostaglandin D synthase promote oligodendrocyte development and myelination
Source: eLife. 2023 Feb 13;12:e77441. doi: 10.7554/eLife.77441 (PMC9946447; doi:10.7554/eLife.77441)
Supplement: Figure 7—figure supplement 1—source data 1. [file elife-77441-fig7-figsupp1-data1.xlsx]

## Sheet: Sheet1
Figure 7-figure supplement 1-source data 1
	Figure 7-figure supplement 1B
	Ctrl_AT56_0 µM	Ctrl_AT56_1 µM	Ctrl_AT56_5 µM
	20.4461	15.4762	24.2268
	6.55271	20.1521	22.9787
	10.8787	5.44218	20.5128
