# Supplementary material for: Oligodendrocyte-lineage cell exocytosis and L-type prostaglandin D synthase promote oligodendrocyte development and myelination
Source: eLife. 2023 Feb 13;12:e77441. doi: 10.7554/eLife.77441 (PMC9946447; doi:10.7554/eLife.77441)
Supplement: Figure 7—figure supplement 2—source data 1. [file elife-77441-fig7-figsupp2-data1.xlsx]

## Sheet: Sheet1
Figure 7-figure supplement 2-source data 1
	Figure 7-figure supplement 2B
	Ctrl_AT56_0 µM	Ctrl_AT56_1 µM	Ctrl_AT56_5 µM
	38.5	35	31.5
	77	64.5	67.1
	81.4286	69.4215	55.5556
	49.25	52	34.05
	48.3	45.8	29.4
