# Supplementary material for: Oligodendrocyte-lineage cell exocytosis and L-type prostaglandin D synthase promote oligodendrocyte development and myelination
Source: eLife. 2023 Feb 13;12:e77441. doi: 10.7554/eLife.77441 (PMC9946447; doi:10.7554/eLife.77441)
Supplement: Figure 7—source data 1. [file elife-77441-fig7-data1.xlsx]

## Sheet: Sheet1
Figure 7-source data 1
	Figure7B			Figure 7C			Figure 7E				Figure 7G
	Ctrl	PD:ibot		Ctrl	PD:ibot		AT-56_0µm	AT-56_1µm	AT-56_5µm		HPGD_0µm	HPGD_3µm	HPGD_6µm
	3.34978	2.36332		111.9	43.4		27.1375	13.0952	4.63917		47.5784	29.7521	26.8817
	3.94584	1.80604		25.9	25.3		29.6296	13.6882	8.51064		53.9394	51.3661	48.6842
	9.46015	0.363175		21.4	15.5		27.1967	18.0272	8.71795		37.6923	44.7761	31.3043
	1.09497	0.859315		10.9	2.8						81.3084	78.75	66.3265
	3.41858	2.32205		80.8	21.5						65.3598	58.2929	58.0245
	2.95445	2.31803		12	6.1						63.7584	44.9664	29.2208
	4.21786	5.05692		34.6	10.1						64.0625	42.735	34.9398
	3.10443	1.89989		23.2	27.7
	3.06323	2.41644		28.9	19
	3.79212	2.66935		22.4	18
