# Supplementary material for: Oligodendrocyte-lineage cell exocytosis and L-type prostaglandin D synthase promote oligodendrocyte development and myelination
Source: eLife. 2023 Feb 13;12:e77441. doi: 10.7554/eLife.77441 (PMC9946447; doi:10.7554/eLife.77441)
Supplement: Figure 8—source data 1. [file elife-77441-fig8-data1.xlsx]

## Sheet: Sheet1
Figure 8-source data 1
	Figure 8B						Figure 8D					Figure 8F			Figure 8G			Figure 8I			Figure 8K
	WT_CC	LPGDS-/-_CC	WT_CTX	LPGDS-/-_CTX			WT_CC	LPGDS-/-_CC	WT_CTX	LPGDS-/-_CTX		WT	LPGDS-/-		WT	LPGDS-/-		WT	LPGDS-/-		WT	LPGDS-/-
	205.47	76.06	37.22	9.46			729	598	393	383.4		55.5365	14.4081		31	5		17.674	3.785		3.344	1.43
	259.16	75.77	43.48	17.81			671	692	427.9	409.8		30.3522	92.5696		7.5	7.5		29.111	4.9365		0.663	1.104
	239.17	137.96	41.52	17.05			746	792	403.8	332.2		23.2465	33.3558		9.5	13.5		2.801	13.5163		2.261	0.911
	166.44	166.33	47.62	12.66				586		427.9		35.5433	40.875		12	10.5		15.585	4.959		0.3255	0.9795
