# Supplementary material for: Oligodendrocyte-lineage cell exocytosis and L-type prostaglandin D synthase promote oligodendrocyte development and myelination
Source: eLife. 2023 Feb 13;12:e77441. doi: 10.7554/eLife.77441 (PMC9946447; doi:10.7554/eLife.77441)
Supplement: Figure 9—source data 1. [file elife-77441-fig9-data1.xlsx]

## Sheet: Sheet1
Figure 9-source data 1
	Figure9B				Figure 9D					Figure 9F				Figure 9G				Figure 9H
	Ctrl_PTGDS_0uM	PD:ibot_PTGDS_0uM	PD:ibot_PTGDS_20uM		Ctrl_PGD2_0µm	PD:ibot_PGD2_0µm	PD:ibot_PGD2_1µm	PD:ibot_PGD2_2µm		Ctrl	PD:ibot	PD:ibot:Ptgds-TG		Ctrl	PD:ibot	PD:ibot:Ptgds-TG		Ctrl	PD:ibot	PD:ibot:Ptgds-TG
	65.9639	33.6957	53.4783		48.76	9.25	32.28	26.88		18.9845	3.99267	24.9855		3.947	0.976	3.10925		3.7925	0.36575	1.5205
	73.718	45.6954	55.8824		61.94	12.45	32.58	35.67		38.859	8.105	23.9915		5.298	1.12525	2.82575		7.34525	1.2745	2.744
	51.8293	42	53.9267		51.35	11.96	32.26	18.34		14.123	7.975	16.284		2.076	0.97775	1.5295		2.151	1.20975	1.593
	56	23.3831	49.0196			17.79	24.46	31.94		28.224	7.2915	12.2345		4.1015	1.467	2.666		3.68775	0.6795	2.4185
	59.8726	31.6	44.3662			8.87	37.54	23.88			3.926				0.815				0.2105
						8.2	33.48	16
