# Supplementary material for: Oligodendrocyte-lineage cell exocytosis and L-type prostaglandin D synthase promote oligodendrocyte development and myelination
Source: eLife. 2023 Feb 13;12:e77441. doi: 10.7554/eLife.77441 (PMC9946447; doi:10.7554/eLife.77441)
Supplement: Supplementary file 1. — Reads per kilobase of transcripts per million mapped reads (RPKM) are shown. [file elife-77441-supp1.xlsx]

## Sheet: rpkm_data
gene_name	ctrl_microglia-1	ctrl_microglia-2	ctrl_microglia-3	pdibot_microglia-1	pdibot_microglia-2	pdibot_microglia-3	ctrl_OLG-1	ctrl_OLG-2	ctrl_OLG-3	pdibot_OLG-1	pdibot_OLG-2	pdibot_OLG-3	ctrl_OPC-1	ctrl_OPC-2	ctrl_OPC-3	pdibot_OPC-1	pdibot_OPC-2	pdibot_OPC-3	ctrl_Astrocyte-1	ctrl_Astrocyte-2	ctrl_Astrocyte-3	pdibot_Astrocyte-1	pdibot_Astrocyte-2	pdibot_Astrocyte-3
Gnai3	3.52268	3.09199	3.647	3.15145	2.70837	2.48996	3.06366	3.13338	3.01038	2.97039	2.71455	3.19147	2.27255	2.59217	1.73786	2.23342	1.64666	1.87079	1.61441	2.00139	1.33202	1.99782	1.24109	1.38545
Pbsn	0	0	0	0	0	0	0	0	0	0	0	0	0	0	0	0	0	0	0	0	0	0	0	0
Cdc45	0.10174	0.108109	0.117372	0.17693	0.0888974	0.0752776	0.114993	0.122804	0.0713389	0.129938	0.0924166	0.0716353	0.467166	0.39862	0.132444	0.43614	0.3723	0.163499	0.740243	0.533723	0.465306	0.653775	0.404102	0.319698
H19	0	0.0954457	0.0372681	0.180915	0.0919387	0.0726628	0.0235166	0.137835	0.0573841	0.207069	0	0.0576225	0.591701	0.0961933	0.172098	0.453653	0.315235	0.164396	3.6031	1.20304	3.30658	2.77324	0.900149	0.994179
Scml2	0.00135294	0	0.00609949	0.00430684	0.00136792	0.00108112	0.0118965	0.0184572	0.00426899	0.0286085	0.0165909	0.0115742	0.0421651	0.0520012	0.0160951	0.0330738	0.0238422	0.0303302	0.00604047	0.00789688	0.0133243	0.0119201	0.00948671	0.00473345
Apoh	0	0	0	0	0	0	0.000865297	0.00126792	0	0.0021769	0	0.00106011	0.00114588	0.00117982	0	0	0.00193319	0.00120979	0.00186727	0	0.00126735	0.0011338	0	0.00585295
Narf	2.97071	2.33808	3.29914	2.33876	2.74308	2.33303	3.47957	4.05274	3.22533	2.94704	3.24952	3.06465	2.27549	1.97793	2.78096	1.81674	2.56543	1.83876	1.03397	1.15846	1.05024	1.18636	1.26484	0.698485
Cav2	0.4646	0.346084	0.257982	0.715631	0.353572	0.431139	1.13953	1.32898	0.567473	2.35975	1.66205	1.45307	3.16178	3.22371	1.32098	4.74041	2.87491	4.05344	1.1877	2.34439	1.82795	2.13303	2.4603	1.87453
Klf6	11.0953	12.2247	15.1397	9.89126	11.5148	11.8393	3.82134	4.12373	4.68756	2.2212	3.69017	3.13521	3.06915	2.57694	4.00221	2.75439	2.8201	3.22105	1.77131	2.30401	2.08116	1.82569	2.27722	2.9977
Scmh1	0.652732	0.725751	0.747966	0.748149	0.776689	0.76034	0.373053	0.370671	0.291225	0.416638	0.442375	0.316553	0.522044	0.548912	0.390006	0.527867	0.606943	0.578684	0.300559	0.39839	0.490164	0.415939	0.37127	0.311259
Cox5a	1.10834	1.40945	0.768729	1.29763	1.13498	0.774955	1.91826	1.71234	1.17021	2.79432	2.841	1.89767	3.29944	4.22389	1.62509	2.95612	3.39895	2.21185	7.54153	7.3566	5.46574	6.27649	6.05725	3.52346
Tbx2	0.0632371	0.0265505	0.020734	0.0201304	0.025575	0.0303193	0.0196251	0.0383422	0.0399069	0.00822875	0.00674318	0.00801453	0.0606405	0.0802754	0.047873	0.0630973	0.0584601	0.0640228	0.0423502	0.0196855	0.067069	0.0857158	0.0208665	0.0995597
Tbx4	0.00400498	0	0	0	0	0.00320035	0.0165722	0.00607079	0	0	0.00427064	0.00253791	0.0137162	0.00282448	0	0.0199806	0.0231402	0.011585	0.00447026	0	0	0.00814293	0	0.003503
Zfy2	0	0	0	0	0	0	0	0	0	0	0	0	0	0	0	0	0	0	0	0	0	0	0	0
Ngfr	0	0	0	0.00499987	0	0.0200815	0.0194975	0.0190464	0.0396474	0.0613144	0.231127	0.155267	0.0473363	0.101907	0.118904	0.106568	0.18513	0.118126	0.168299	0.0977877	0.109468	0.0894164	0.290232	0.0659416
Wnt3	0	0	0	0	0	0	0.457462	0.419462	0.479382	0.148272	0.27483	0.251002	0.174678	0.200898	0.510526	0.0703817	0.0940517	0.117715	0.0817605	0.13935	0.0164422	0.0349349	0.0290944	0.0427129
Wnt9a	0.0133918	0.0156184	0.00365906	0	0.00902674	0	0.0300159	0.0338324	0.00563409	0.0377566	0.0190402	0.011315	0.134534	0.0472223	0.0362076	0.0935353	0.116064	0.0710191	0.0149476	0.0208442	0.125124	0.0484057	0.0699664	0.0702796
Fer	0.25151	0.231353	0.289683	0.225821	0.219665	0.215753	0.0809451	0.0931924	0.0957746	0.100142	0.0871056	0.0820054	0.0839281	0.107335	0.0681174	0.0836513	0.0817266	0.0774165	0.0566257	0.0605611	0.0459241	0.0469121	0.0439784	0.0409888
Xpo6	1.30895	1.35036	1.51967	1.32128	1.31696	1.62664	2.00312	1.882	1.99297	2.17685	1.84479	2.05309	1.65554	1.65875	1.77473	1.58936	1.51607	1.82183	0.868824	1.0964	1.20034	1.1725	0.973605	0.932328
Tfe3	15.051	15.6699	13.9324	14.8959	15.4617	14.5964	2.49936	2.22303	1.7976	2.89313	2.86704	2.234	3.21965	3.46086	2.61294	3.24556	3.49807	3.92271	3.14796	3.15332	3.75325	3.56798	3.83107	3.20685
Axin2	0.0312408	0.0437222	0.0384119	0.0310779	0.0315868	0.0561696	0.706952	0.594898	0.295726	0.823207	0.680836	0.68547	0.90409	0.919849	0.335753	0.783189	0.751353	0.722947	1.38173	1.12447	1.49102	1.30478	1.1114	1.03494
Brat1	1.00915	0.983996	1.15265	0.888686	1.09838	1.52026	1.42044	1.35414	1.05966	1.43694	1.57885	1.76121	1.83004	1.36505	1.35528	1.38657	1.16136	1.23823	1.19101	0.804674	1.27834	1.25014	1.28966	0.991185
Gna12	3.78541	3.66387	2.6687	4.47416	4.27335	3.27807	3.4388	3.30796	3.81237	2.55522	3.25261	2.76267	3.46767	2.98966	5.53583	2.19148	2.61048	2.74581	3.02614	3.10907	3.19773	3.30585	2.99203	2.40166
Slc22a18	0.0371428	0.0649778	0.0342515	0.0406441	0.0625903	0.0704913	0	0	0	0.00302077	0	0	0	0	0.00753178	0.0138978	0	0	0.124374	0.180664	0.239175	0.066079	0.0574506	0.105584
Itgb2l	0	0.00779757	0.00913402	0	0	0.00890444	0.00288184	0	0	0	0	0	0	0	0	0	0.0032192	0	0	0	0	0	0	0
Igsf5	0.00196595	0	0	0.00156456	0	0.00157098	0	0.00149001	0	0	0	0	0.00134659	0	0	0.00392321	0.0022718	0	0	0	0	0.00133239	0	0
Pih1d2	0.0464309	0.0324906	0.063432	0	0.0312968	0	0.0320211	0.0586504	0.0488351	0.040279	0.041259	0.0294228	0.0954096	0.0764051	0.0502145	0.0772138	0.0715392	0.111923	0.4146	0.349301	0.316572	0.503485	0.268117	0.406113
Dlat	1.01612	1.05498	1.24355	0.929013	1.11497	0.993247	1.53516	1.81247	1.6195	1.94029	2.23255	2.35998	1.7319	2.08983	1.3647	1.56089	1.67938	1.46963	1.86741	2.52316	1.66129	1.72324	2.25736	1.82298
Sdhd	9.19854	9.40417	7.40932	10.4669	8.84372	7.08296	10.736	10.9226	6.84114	10.1752	10.3527	7.5161	11.4328	10.2311	6.05162	10.8325	9.51506	7.92017	19.2888	15.6822	11.7752	16.0446	13.5851	9.70492
Fgf23	0	0	0	0	0	0.0111651	0.00722695	0	0.00881742	0.0181814	0.00744952	0	0.0191407	0.0689766	0.0151108	0.0278827	0.0161459	0	0.0467863	0	0	0.0473472	0	0.0366628
Fgf6	0	0	0	0.00750595	0	0	0	0	0	0	0	0	0	0	0	0	0	0	0	0	0	0	0	0
Ccnd2	0.153885	0.141526	0.176594	0.178451	0.18078	0.126482	0.529876	0.686453	0.210872	1.16427	0.625897	0.390062	2.12918	2.31316	0.782197	2.64536	2.16439	1.87593	7.5183	7.0111	7.50433	10.6588	6.30009	6.14917
Gpr107	1.31081	1.15377	1.59045	1.23958	1.45732	1.69766	1.14511	1.05582	0.833984	0.737664	0.822831	0.735459	1.10608	0.887867	0.956367	0.717302	0.798701	0.742307	1.12577	1.06328	1.11225	1.10048	1.20673	0.888433
Nalcn	0.00372978	0.00355903	0.00444695	0.00296827	0.00799927	0.00514803	0.172749	0.17295	0.120041	0.269805	0.183312	0.196387	0.245023	0.252996	0.14503	0.315315	0.262912	0.279531	0.0151385	0.0187355	0.0143847	0.0202224	0.0234957	0.0177943
Btbd17	0.226233	0.0703596	0.206047	0.300071	0.304985	0.281215	3.12043	3.33401	2.8395	3.63077	2.76085	3.42475	1.20524	1.41821	1.35927	1.0785	1.29262	1.43607	20.089	18.0759	12.854	14.2934	15.179	6.5959
Slfn4	0.00790737	0.0165998	0.0388898	0.0377575	0	0.00631871	0	0	0	0	0	0	0	0	0	0	0	0	0	0	0	0	0	0
Th	0	0.00216711	0	0.00739388	0.00208748	0	0.00640739	0.0117359	0.00390874	0.00604484	0.00165118	0.00588747	0.0466678	0.00436817	0.00837322	0.037081	0.0429448	0.0246353	0.0103701	0.0168712	0.00469227	0.00419779	0.0408761	0.00541752
Ins2	0	0	0	0	0	0	0	0	0	0	0	0.00116358	0	0	0	0.00183214	0	0	0	0	0	0.00124445	0	0
Scnn1g	0	0	0	0	0	0.00279357	0	0	0	0	0	0	0	0	0.00378081	0	0.00807962	0	0	0	0	0	0	0
Drp2	0.068537	0.0607487	0.0524341	0.0509075	0.0508171	0.0620697	0.261147	0.266649	0.112454	0.469703	0.390995	0.209917	0.799628	0.918368	0.396552	0.98931	1.00451	0.779795	1.63963	2.23666	2.04744	2.11966	2.17673	1.93028
Tspan32	0.407068	0.32473	0.353692	0.485936	0.351212	0.481422	0.0715873	0.0185112	0.0667908	0.074158	0.0477478	0.051591	0.0167295	0.0172249	0.0264144	0.0324935	0.0141119	0.00588752	0.0545232	0.0190079	0.0308382	0.0110354	0.0604447	0
Lhx2	0.0429307	0.0464273	0.0351901	0.0745429	0.0552441	0.0654924	0.149381	0.156771	0.0443326	0.281858	0.27467	0.145916	0.769894	1.02665	0.297567	1.03585	0.856893	0.702763	7.57542	8.56524	9.55583	8.63609	7.318	7.40072
Clec2g	0.00236156	0.00826263	0.00193576	0.0018794	0.00159181	0.0018871	0	0	0	0	0	0	0	0	0	0	0	0	0	0	0	0	0	0
Gmpr	0.666589	0.588449	0.430815	0.669235	0.713718	0.352379	0.0795657	0.0757817	0.024269	0.155132	0.114823	0.0487397	0.305561	0.260367	0.0831816	0.309535	0.263677	0.198383	0.406355	0.269361	0.182572	0.271062	0.232646	0.13679
Glra1	0	0	0.00103681	0	0	0.00101075	0.00130848	0	0.000798222	0.000822963	0.000674389	0	0.00259916	0.00892043	0.00205192	0.00378624	0.0116933	0.00457354	0.00141182	0.00196876	0	0	0.00208687	0
Mid2	0.0138308	0.0233891	0.0094475	0.0155931	0.0147608	0.0211831	0.0327882	0.0183442	0.0341852	0.0247463	0.0356415	0.0262932	0.053683	0.0422675	0.0467431	0.0655509	0.0705892	0.0458419	0.222558	0.234111	0.302108	0.27652	0.315661	0.289325
Trim25	5.25005	4.14294	5.03465	5.02824	4.41583	5.54375	2.38931	2.28235	2.15856	3.64872	2.75674	3.2981	2.64645	2.26802	1.4379	2.63056	2.33415	2.98307	1.02106	1.08778	1.42906	1.51336	1.01711	1.15297
Dgke	0.243917	0.162806	0.310672	0.223981	0.194765	0.419811	1.44408	1.17461	1.52034	1.32819	0.974363	1.35782	1.07441	0.90774	1.00647	1.19442	1.01254	1.00136	0.423041	0.496471	0.372411	0.434895	0.334327	0.449665
Scpep1	3.56789	3.98039	4.10804	3.87113	4.99839	4.67225	0.639259	0.570042	0.355387	0.691	0.628719	0.464641	1.26076	1.22613	0.517072	1.38403	1.24475	1.17802	1.73808	1.68543	1.74659	1.67268	1.8146	1.21654
Mnt	2.06308	2.06157	2.35569	2.33821	2.61349	2.784	0.847037	1.00996	0.739625	0.976689	1.06572	0.72235	1.31415	0.962431	0.703216	0.993214	1.25232	1.19007	1.0125	0.880881	1.29534	1.06634	1.0463	1.12342
Itgb2	7.47156	7.88585	8.37468	7.58933	8.37785	8.04901	0.0294741	0.0381072	0.0634598	0.0501604	0.0357432	0.15506	0.0390313	0.00709187	0.0126879	0.0301011	0.0445448	0.106657	0.0411553	0.00782597	0.0355509	0.0136305	0.0138258	0
Hddc2	0.553302	0.454515	0.512696	0.708364	0.44322	0.839424	1.03691	0.650297	0.622436	1.26259	0.949138	1.16874	1.75763	1.49864	0.914928	1.80026	1.23243	1.73388	2.88205	2.12182	2.66078	2.65755	2.40125	2.76343
Tpd52l1	0.00418544	0.000732203	0.00514618	0.000832725	0.00493709	0.00167228	0.0270608	0.0237913	0.00924454	0.0354011	0.0245469	0.0165767	0.0659375	0.0804352	0.0158428	0.0950083	0.0598528	0.0438878	0.133143	0.110748	0.0943301	0.0907717	0.107897	0.119893
Pemt	0.00626545	0.00438432	0.00898757	0.00249311	0.00422322	0.00625834	0.0202545	0.015433	0.0118618	0.042803	0.0242188	0.0228295	0.0418427	0.0397679	0.017787	0.0375096	0.0407261	0.0430438	0.057695	0.0524175	0.0462784	0.0838645	0.0219664	0.0548014
Cdh1	0.00355326	0	0.00436889	0	0.00239507	0.00283938	0	0.00134652	0.00224235	0.00115592	0.00094724	0.00562916	0.00243383	0.00501182	0	0	0.00410606	0.00256958	0	0	0	0	0.0014656	0
Cdh4	0.00208075	0.000364007	0.000426395	0.00248388	0.00157785	0.00207839	0.0434532	0.0305546	0.0101765	0.0678589	0.0378578	0.0230746	0.166217	0.134087	0.0634304	0.181923	0.140661	0.145957	0.066481	0.0506041	0.0827563	0.0921914	0.0639388	0.0682481
Ckmt1	0.434111	0.538508	0.161745	0.26696	0.399017	0.236519	0.642996	1.002	0.36112	0.975717	1.93579	0.812771	4.90623	3.91041	0.554846	4.11494	4.77705	1.71236	1.12326	0.921393	0.433509	0.294212	1.77428	0.310663
Bcl6b	0.293451	0.352021	0.377992	0.200175	0.522759	0.385241	0.173467	0.190636	0.0132277	0.354579	0.245863	0.159392	0.933221	1.31564	0.294695	0.690177	0.980981	0.833691	0.210563	0.228377	0.0476377	0.213088	0.172912	0.25667
Clec10a	4.96112	5.18183	4.15979	4.26484	4.03365	3.76325	0.0125994	0	0.00512407	0.0105658	0.0259748	0.0257268	0.0222465	0	0.00439066	0	0	0.0469747	0.00906298	0.00631909	0.0184536	0.00550298	0.0200945	0.00710196
Alox12	0.0342106	0.0837874	0.0701057	0.0340323	0.132593	0.0478405	0.00884751	0.0129642	0.0107946	0.0111292	0	0.0108395	0.0117164	0.00603169	0.0138744	0.00853375	0.0148248	0	0	0.0266242	0.187897	0.202875	0.48682	0.538608
Arvcf	0.534768	0.708881	0.587219	0.546033	0.83654	0.619224	1.25149	0.951317	0.666036	1.59131	1.29111	1.06395	2.11068	1.81739	0.898072	2.0236	1.76645	1.71618	0.459497	0.422462	0.678773	0.698876	0.562671	0.476566
Comt	7.54182	7.92246	6.14296	7.3142	9.09986	6.00283	2.37996	2.30083	1.48755	2.98985	3.28793	2.46314	3.30662	3.68161	2.22418	3.83682	4.20624	3.33608	3.70073	3.82644	3.81949	4.36099	4.09037	2.87394
Rtca	0.852221	0.777849	0.79474	1.23849	0.828358	0.903069	1.74404	1.58667	1.41857	1.91657	1.82738	1.80797	1.97962	1.71161	1.50939	1.713	1.42012	1.43355	1.97138	1.2736	1.47369	1.80389	1.36529	1.33416
Dbt	0.792082	0.669178	0.572726	0.671361	0.510029	0.532601	0.894333	0.878522	0.741659	1.12707	0.825739	1.07528	0.498433	0.485945	0.478805	0.549376	0.53207	0.498292	0.549868	0.598892	0.600056	0.643748	0.480764	0.574519
Dazap2	86.1273	85.3471	68.456	92.3805	83.6174	79.5981	51.6132	48.5162	52.0794	56.5797	64.1384	65.7106	49.5323	50.7514	64.5155	46.1894	53.2779	64.4436	103.045	102.2	126.302	91.9178	107.135	108.484
Mcts1	0.841776	0.699083	0.743077	0.699357	0.779394	0.64309	0.488029	0.574889	0.671319	0.535646	0.7102	0.545149	0.430851	0.574085	0.325132	0.57225	0.422231	0.374609	0.289098	0.215969	0.231255	0.376154	0.396805	0.250817
Rem1	0.014411	0.0302528	0.0118126	0.0229374	0.00971375	0.0345472	0.0149078	0.0109222	0	0.0281286	0.015367	0.00913212	0.0296128	0.0508163	0.0311707	0.086275	0.016653	0.0104215	0	0	0.109173	0.0195337	0	0
Rnf17	0.0184409	0.0129042	0.0190938	0.0146758	0.0143927	0.0139604	0.00702824	0.0117696	0.00796247	0.0069463	0.00620973	0.00492034	0.00797762	0.0150588	0.00262416	0	0.00448628	0.00280752	0.00216666	0.000755343	0.000735276	0.000657791	0.00160132	0.00424461
Trappc10	1.37694	1.26795	1.35743	1.43223	1.44268	1.51845	2.48051	2.22871	2.3815	2.03341	1.89826	2.10791	1.53349	1.4501	2.29363	1.10976	1.34572	1.54334	0.968869	1.00931	1.20947	1.14598	1.10033	0.956663
Ccm2	0.97973	0.753968	0.814804	0.728477	0.851594	0.727654	0.56347	0.630529	0.383602	0.446673	0.607513	0.472809	0.612293	0.653962	0.358345	0.60414	0.647337	0.427515	0.649212	0.53243	0.431603	0.557369	0.45425	0.408658
Wap	0	0	0	0	0.0253912	0	0.0194841	0	0	0.0245089	0	0	0	0	0	0	0	0	0	0	0.0285373	0	0	0
Tbrg4	1.37363	1.16776	1.30276	1.31001	1.80588	1.68731	2.38397	2.67584	1.88416	2.57777	2.96582	1.93515	3.10257	3.86697	2.02577	2.77518	3.00413	2.44645	3.0791	3.25124	3.43147	3.00061	2.78138	1.81709
Tmprss2	0	0.00536399	0.00837778	0	0.0034446	0	0.017181	0.00774625	0.00967484	0	0.0177102	0.00485752	0.00700067	0.007208	0.00276336	0	0	0	0.00285199	0.00795412	0.0038714	0.0155854	0.00210782	0.00446978
Mx1	1.46014	1.29945	4.35782	1.65067	0.948875	4.36198	0.0580952	0.0397258	0.137036	0.0194873	0.0838381	0.232505	0.00512888	0.0264039	0.0445393	0.044828	0.0043264	0.0703943	0	0.0116548	0.0623984	0.0202992	0.024708	0.0392961
Fap	0.00487534	0.00909753	0.00532838	0.00775987	0.00547703	0.0155834	0	0.00246336	0.00102556	0	0.000866456	0	0.00222626	0.00343829	0.000878769	0.00486456	0.00375588	0.00235044	0.00181391	0	0.0073868	0.00770976	0.00268121	0.00568569
Gcg	0	0	0	0.0103709	0	0	0	0	0	0	0	0	0.00892605	0	0	0	0	0	0	0	0	0	0	0
Ndufa9	4.01	3.78588	3.30119	3.53628	3.41593	3.0069	4.36799	3.58461	2.20776	4.48469	4.04948	3.17843	6.04566	4.83362	2.42155	5.12145	3.34138	3.48298	6.49363	4.40617	3.76693	4.54225	4.29501	2.84004
Egfl6	0	0	0	0.00603272	0.00127739	0	0.0215648	0.0201083	0.00717564	0.0480873	0.0212185	0.0252191	0.0921626	0.100238	0.030743	0.117237	0.0897873	0.0945621	0.736114	0.877538	0.597239	0.86567	0.559673	0.484011
Lck	0.0328867	0.0624634	0.0500631	0.0186944	0.0475013	0.0450505	0	0	0.00592963	0.0122268	0.0175341	0	0.00965398	0.0132532	0.0101619	0.00468771	0.0190015	0.00679496	0.0367073	0.0182813	0.0177956	0.0127362	0.0155024	0.0452016
Tssk3	0.0591871	0	0.0485154	0	0	0	0	0	0.0373511	0	0	0.0750125	0.0405406	0.0417412	0	0	0.0341976	0.128405	0	0	0	0.0401131	0	0
Cttnbp2	0.0248325	0.0235428	0.0420234	0.0325124	0.0480553	0.0531293	0.490156	0.485089	0.318981	0.778129	0.557783	0.410154	1.10999	1.06603	0.716451	1.30842	1.01407	1.13367	0.252139	0.258716	0.31981	0.360485	0.347587	0.277456
Galnt1	3.20335	2.55291	3.62299	2.57254	2.49549	2.57376	1.02537	1.01713	0.940803	1.20818	0.894402	1.07967	1.08409	0.945422	0.605004	1.02758	0.714719	0.889271	1.14461	0.969494	1.08408	1.10924	1.02525	1.22868
Myf5	0	0	0	0	0.0248324	0	0	0	0	0	0	0	0	0.0259815	0	0	0	0	0	0	0	0	0	0
Mkrn2	0.734124	0.666219	0.940246	0.588802	0.807974	0.953278	1.21924	1.16495	0.915705	1.01872	1.06415	1.03581	1.26104	1.05569	1.21573	1.13309	0.977573	1.04519	1.38916	0.981968	1.10795	1.20498	0.993566	0.822702
Pparg	0.00918112	0.00770951	0.005268	0.0073066	0.00928279	0.00733656	0.000474882	0.000695842	0.00115878	0.00358409	0.000979013	0.0011636	0.0037732	0.00388494	0.000992926	0.00641258	0.00265237	0.00863125	0.00102477	0.00214354	0.00556426	0.00311118	0.00151476	0.000803036
Raf1	0.62906	0.671648	0.720229	0.673421	0.778278	0.719963	0.657044	0.644406	0.536563	0.822528	0.708655	0.631377	0.768633	0.742739	0.594732	0.907084	0.755065	0.793894	0.586628	0.565365	0.699461	0.704141	0.575847	0.436621
2021-09-01	0.00636128	0.035611	0.0782146	0.0506249	0.0686051	0.0914984	0.0987087	0.0626762	0.112403	0.07036	0.111923	0.100777	0.0522864	0.125615	0.0894353	0.0761666	0.124966	0.0230011	0.156207	0.0742593	0.0819247	0.0388013	0.141686	0.0389477
Pdgfb	2.3517	2.20287	2.45804	1.69331	3.40096	2.21231	0.0353974	0.0471524	0.0431875	0.0526217	0.0696581	0.078849	0.132103	0.144791	0.0470987	0.211061	0.179733	0.134973	0.0208326	0.121044	0.032992	0.0463811	0.0615869	0.0163249
Acvrl1	0.360487	0.484725	0.26652	0.275636	0.524088	0.316304	0.0182801	0.0535716	0.00892125	0.0183955	0.0150745	0.00895832	0.0290492	0.0548341	0.00764436	0.0423165	0.0285881	0.0255579	0.00788955	0.0330055	0.0267739	0	0.0233237	0.0370946
Grasp	0.0416133	0.0776518	0.0682205	0.0331171	0.0747986	0.144096	0.229589	0.126156	0.0875362	0.415147	0.310616	0.501029	0.361042	0.322822	0.120011	0.539778	0.512931	0.441366	0.232239	0.291468	0.168133	0.0940092	0.25174	0.14559
Acvr1b	0.626983	0.627669	0.501639	0.553882	0.649092	0.5154	0.737043	0.818515	0.412707	1.04423	0.906891	0.566503	1.58426	1.45135	0.757561	1.67325	1.90318	1.39494	0.760094	0.686392	0.620431	0.813258	0.890902	0.595627
Tom1l2	0.251463	0.284047	0.284866	0.269077	0.34598	0.270933	0.863696	0.912238	0.93431	0.805175	1.07307	0.860009	0.968292	1.04612	1.22277	0.872066	1.28205	1.00663	1.31928	1.48057	1.97849	1.47382	1.76673	1.49595
Gpa33	0	0.00917126	0.0241721	0	0.00883428	0.0261828	0	0	0	0	0.00174696	0	0	0	0	0	0	0	0	0	0	0	0	0
Zfp385a	2.99864	3.29828	3.19053	3.71138	4.27792	2.90733	0.276882	0.151283	0.131691	0.531285	0.495838	0.264477	1.26157	1.18696	0.331168	1.41679	1.48619	1.05964	3.02294	2.96563	3.50889	3.46195	3.40925	2.90451
Itga5	0.909454	0.969401	0.992522	0.753226	1.20821	1.17039	0.0328189	0.0320595	0.0200207	0.0516031	0.042287	0.0268052	0.115895	0.0894956	0.0600431	0.211033	0.119148	0.107064	0.601984	0.617248	0.797127	1.04639	0.649916	0.679844
Gabra2	0.00687716	0.00661701	0.0126836	0.00342066	0.00753277	0.00549549	0.0200088	0.0273643	0.00867992	0.0520157	0.020625	0.0217899	0.0812572	0.0866949	0.0362581	0.109791	0.0695369	0.0690045	0.0921134	0.0949999	0.106152	0.175948	0.0489313	0.0721822
Wdr77	2.19469	1.74625	1.83551	1.81753	1.8548	1.67364	2.8293	2.78636	1.94744	3.17479	2.56599	2.1885	3.20494	2.96202	1.86148	3.10135	2.78717	2.18329	2.07662	1.62131	1.54447	1.84229	1.64505	1.3447
Adora3	1.10206	1.30205	1.23347	0.94662	1.38047	1.29977	0.00161481	0.00473234	0.00394037	0.00203125	0.00998723	0.015827	0.00213842	0.00220176	0.00168819	0	0.00360769	0.00903079	0.00348468	0	0	0.00423175	0	0
Atp5pb	2.53391	2.83892	2.1834	2.45139	2.56427	2.29225	4.18271	4.00139	2.90935	4.10158	4.86504	4.09002	4.84663	4.5422	3.54921	4.06846	4.49478	3.7735	6.0911	5.90536	4.16001	5.1936	5.68494	3.69185
Sox9	0.107341	0.135203	0.0703894	0.17085	0.274942	0.10293	0.943851	0.732187	0.325149	1.85771	1.22473	0.421729	5.08785	4.14843	0.893875	5.03386	5.81749	2.91869	40.6399	40.1146	54.8896	47.9413	44.8234	43.6573
Hnrnpd	8.10642	6.55833	8.94443	7.87811	5.99348	7.05166	6.10636	5.42731	4.1832	9.95689	5.7848	6.59063	6.92565	5.72792	3.39449	8.17099	4.75842	5.41763	4.16943	3.88418	3.19388	5.16485	2.81725	3.4887
Dynlt1c	0.0733356	0.0410539	0.0480903	0.0350176	0.079091	0.0703223	0.0303455	0.0222326	0.0277679	0.0667998	0.0547401	0	0.0401854	0.0310316	0.00793115	0.0585388	0.0508469	0.0424268	0.0163711	0.0114146	0.0111114	0.00994041	0.0241988	0.0128288
C1d	1.51673	1.31951	1.21805	1.24783	1.18123	0.982705	1.76514	1.6544	1.15117	2.03366	1.896	1.73394	2.35856	1.89358	1.08062	2.34164	1.75269	1.65267	1.31545	1.17241	0.706494	1.26408	1.21738	0.986001
Gm2a	9.83358	11.7939	8.29569	11.9671	13.2029	10.1822	15.1023	12.1216	4.43046	23.5337	17.6577	11.4984	49.4361	45.6118	16.6504	53.4563	42.9812	44.8401	49.1696	44.1997	43.1643	42.8335	43.1831	29.6436
Krit1	1.46386	1.51495	1.75391	1.23194	1.26269	1.29077	0.88916	1.09884	1.19103	0.921412	0.922525	0.89387	0.754894	0.886025	0.711204	0.7499	0.638402	0.683431	0.353705	0.508512	0.414273	0.478949	0.43723	0.493021
Clcn4	4.5188	3.92457	4.48688	3.51458	4.66174	4.538	7.61195	7.05854	6.573	6.99358	6.29487	8.81395	5.83036	5.23005	4.80384	5.35941	4.41447	4.75109	2.45392	2.79343	2.61239	2.68896	3.04033	2.47236
Vmn2r88	0	0	0	0	0	0	0	0	0	0	0	0	0	0	0	0	0	0	0	0	0	0	0	0
Grm6	0	0	0	0	0	0	0	0	0	0	0	0	0	0	0	0	0	0.00553669	0	0	0	0	0	0
Sema4f	0.0213111	0.0328079	0.0489121	0.030528	0.0344754	0.0613063	4.91621	4.25115	3.4644	2.19908	3.23827	3.09256	2.25381	1.74342	2.31168	0.986649	1.48006	1.59353	0.171266	0.398045	0.0871809	0.179096	0.137126	0.0484639
Hk2	3.67875	2.93431	3.39978	2.8913	3.48125	3.00691	0.154213	0.136674	0.130492	0.181468	0.149988	0.193504	0.0576422	0.0593492	0.0598078	0.0167937	0.0444556	0.0852001	0.0375724	0.0654927	0.105647	0.0831071	0.0535539	0.0651944
Myo18a	1.3859	1.12685	1.46127	1.32022	1.48469	1.49573	1.24939	1.30377	1.38126	0.760957	1.00846	1.20959	0.958002	0.882759	1.52198	0.696038	0.95583	0.866705	1.30803	0.961531	1.14106	1.35403	1.07552	1.03006
Sez6	0.036949	0.0361977	0.0282678	0.0215637	0.054792	0.0452727	0.4574	0.431259	0.15234	0.94237	0.606759	0.318433	2.87167	2.77952	0.847149	3.19517	3.0372	2.26586	0.725851	0.864577	1.09353	1.08013	0.719338	0.728229
Haao	0.339423	0.178137	0.539058	0.444578	0.305051	0.463352	0.0109727	0	0.0133875	0.00920159	0.00377019	0	0.0193742	0	0.0114713	0.0423341	0.00408572	0.0102274	0.00789283	0.00550321	0.0267851	0.0239624	0.0116667	0.030925
Cd52	2.87853	3.50855	2.80675	3.3464	3.76642	3.55556	0.0340595	0.0142592	0.0178093	0.0428431	0.0300929	0.0774943	0.0644337	0.0132684	0.0152603	0.0657033	0.0489171	0.0680275	0.0524991	0.0292837	0.0142529	0.0573788	0.0155202	0.0329116
Abhd15	0.926047	0.938377	1.32735	0.885981	1.01646	1.39912	0.0209393	0.00767055	0.022354	0.00987724	0.0404703	0.0416871	0.0173307	0.00356878	0.0301	0.0201967	0.0233905	0.0365946	0.118613	0.0748257	0.05367	0.0548733	0.0333957	0.0265566
Hoxb6	0	0	0.0214272	0	0	0	0	0	0	0	0	0	0	0	0	0	0	0	0	0	0	0	0	0
Loxl3	0.988836	0.786922	0.746972	0.673789	0.984539	0.898626	0.976125	0.999258	0.395622	1.37924	1.22672	1.03617	1.94339	2.21973	0.664015	1.87012	1.658	1.52832	1.42834	1.20212	1.63531	1.38414	1.19426	1.20407
Tcl1b5	0	0	0	0	0	0	0	0	0	0	0	0	0	0	0	0	0	0	0	0	0	0	0	0
Btn1a1	0	0	0.0109349	0	0	0	0	0	0	0.00867949	0	0.00845354	0.0456873	0.0188161	0.0144272	0.0532428	0.00770779	0.0096471	0	0.0207638	0	0	0	0.0233363
Kat2b	0.317724	0.341745	0.402158	0.279658	0.334485	0.350782	0.39778	0.398221	0.62277	0.262965	0.320842	0.441094	0.200709	0.243866	0.517849	0.142267	0.215362	0.222458	0.129072	0.156398	0.173506	0.162831	0.165781	0.160063
Rab5b	1.56895	1.58148	1.55654	1.46167	1.50659	1.51742	1.78405	1.64211	1.79556	1.98489	2.06804	1.67677	1.94036	2.0593	1.77086	1.45987	2.01089	2.14764	1.70952	1.44391	1.5895	1.73846	2.00818	1.28517
Cryba1	0.0178236	0.0124723	0	0	0	0.0142427	0.0184381	0.0135086	0.0449916	0.0115965	0	0	0.0122084	0	0	0	0	0	0	0	0.0270052	0	0	0
Dnmt3l	0.00548317	0	0	0.013091	0	0	0	0	0	0	0	0	0	0	0	0	0	0	0	0	0	0	0	0
Aire	0	0	0	0	0	0	0.0135721	0	0.0275982	0.0170722	0.0093267	0	0.00599099	0	0.0189185	0	0.00505363	0.0189754	0	0.00680692	0.0463826	0.00592781	0	0.00765024
Icosl	5.14077	6.29529	7.52761	6.42806	6.49164	8.86589	0.0715236	0.0431543	0.0718646	0.0899689	0.0737263	0.15979	0.0557153	0.0688383	0.0351878	0.154207	0.0516977	0.164704	1.35279	1.399	3.17967	1.42781	2.08013	2.24821
Spg7	0.655373	0.535038	0.573579	0.578611	0.639623	0.56189	0.759181	0.747652	0.532059	0.728439	0.824419	0.607813	1.39113	1.16753	0.58511	1.23973	0.810582	0.947879	0.8039	0.834127	0.928332	1.00169	0.656086	0.471719
Sult5a1	0	0	0	0	0	0	0.00678392	0.00497022	0	0.00426671	0	0.00831127	0.00898367	0	0.00354611	0.00654334	0.00757807	0	0.0146394	0.0714504	0.0248401	0.0444447	0.0324586	0.0286794
Rpl13	9.5686	8.16132	6.5305	8.6608	8.58116	9.05729	5.96882	5.3846	2.30653	9.05784	8.07945	7.85916	23.4315	22.6484	7.86116	24.6676	17.2265	21.3826	8.7092	6.3281	6.09776	6.79112	5.21712	4.63363
Chmp1a	1.99967	1.11552	1.21501	1.8251	1.74376	1.46383	2.329	2.17266	1.52667	1.93792	1.63279	2.02925	2.52866	2.46548	1.66355	2.17664	1.88255	1.81013	3.30896	2.19832	1.73736	2.54938	2.21484	1.70011
Rpa1	0.57815	0.513999	0.46808	0.663763	0.581358	0.480929	0.682646	0.641112	0.608585	0.556532	0.634187	0.432434	0.759556	0.90905	0.667544	0.72109	0.692738	0.479781	1.33824	1.12117	1.20626	1.33126	1.25879	1.06733
Serpinf1	8.10576	9.71073	5.93613	9.59575	8.83977	5.64005	0.0950703	0.069653	0.0927943	0.221238	0.166597	0.203831	0.144783	0.207402	0.0745431	0.348456	0.424799	0.172796	5.10842	4.57027	4.23999	8.88186	6.33796	5.21686
Tubgcp3	0.969708	0.833501	1.19146	0.889194	0.88717	0.876457	0.987233	0.999093	0.821542	1.21248	0.923633	0.837947	1.00965	0.948467	0.691761	1.08416	0.958289	0.748697	0.686489	0.78977	0.765683	0.88924	0.749207	0.618641
Oprm1	0.00297446	0.00386549	0.009056	0.0030435	0.00400988	0.00950749	0.00219786	0.00193231	0.00107262	0.00138233	0.00158588	0.00188489	0.00931374	0.0167817	0.00367639	0.0127195	0.0186592	0.00952593	0.00237144	0.00330694	0	0.00230388	0.00140213	0.00111499
Polr3d	1.46976	0.922086	1.26707	1.43185	1.28107	1.19472	3.87971	4.82066	2.81454	3.56126	3.53983	3.0671	3.03752	2.46624	2.71315	1.49179	2.73796	2.40062	1.72536	1.99184	2.05411	1.82047	2.71756	1.52935
Tcf7	0.046065	0.0564104	0.0440525	0.0549898	0.0362251	0.0552153	0.119133	0.0581882	0.0387602	0.169837	0.114615	0.080275	0.141986	0.284261	0.085107	0.183853	0.177438	0.172114	0.137111	0.125474	0.267547	0.166506	0.0918345	0.144377
Ddx3x	41.6994	26.5668	40.9797	38.543	25.2232	31.9931	21.8833	23.7134	20.3985	25.7003	19.5347	28.7791	17.8032	15.0629	12.1095	20.0331	11.905	15.623	9.98815	8.00348	7.54997	12.8991	7.99649	9.20958
Il12rb1	0.00915975	0.0192289	0.037541	0.0072896	0.0555671	0.0512364	1.93774	2.01324	1.70522	0.321817	0.776504	0.679119	0.690144	0.962516	1.7732	0.036558	0.344005	0.337822	0.0306716	0.0855422	0.0485739	0.0124157	0.0226685	0.0160233
Slc5a5	0.0120437	0.067422	0.0197444	0	0.0487085	0	0.0996716	0.118664	0.0836047	0.141048	0.128426	0.068688	0.371225	0.569082	0.123739	0.228325	0.4384	0.322254	0.0268859	0.3468	0.109488	0.122437	0.0397411	0.0210684
Kcnn3	0.00383459	0.00858655	0.0119441	0.00244134	0.00775411	0.00796689	0.0511715	0.0575438	0.0246828	0.103288	0.0903658	0.0665803	0.170724	0.167667	0.0883323	0.19054	0.215354	0.160281	0.624891	0.682795	0.680923	0.734949	0.758553	0.705003
Usp32	0.648736	0.630738	0.794521	0.650517	0.596759	0.650745	0.741369	0.776277	0.991221	0.787562	0.723916	0.894258	0.616871	0.649135	0.707378	0.558964	0.56798	0.593325	0.385053	0.313616	0.420345	0.415877	0.356985	0.46729
Car4	0.0575673	0.171204	0.106172	0.0229069	0.00970081	0.345012	0.14888	0.272691	0.0544933	0.103001	0.130445	0.0547197	0.423885	0.548085	0.17121	0.588761	0.465663	0.270598	0.305212	0.134404	0.0981252	0.214584	0.213701	0.0377639
Txnrd3	0.158258	0.15293	0.237825	0.20991	0.175249	0.186683	0.109142	0.0913861	0.0451799	0.139741	0.108486	0.0811841	0.201314	0.175387	0.0876143	0.180466	0.124096	0.201642	0.332257	0.258056	0.351109	0.306447	0.251778	0.207633
Fasl	0	0	0.01248	0.0121166	0	0	0	0	0.0192162	0.00990592	0	0.00964804	0.0104286	0.0107374	0.0164658	0	0.0351876	0	0	0	0	0	0	0
Zfp512b	3.28775	2.75921	3.3869	3.88054	3.46641	4.04733	6.58962	6.21267	4.5281	10.0523	7.35515	5.94054	9.6089	9.3843	5.89807	11.2822	9.19005	8.83557	5.269	4.8753	5.40212	6.54916	5.08532	4.04147
Dnajc5	5.61515	5.33103	5.14817	5.24943	5.34093	5.56424	4.97131	5.07207	4.16263	6.08598	5.62734	5.53846	6.51517	5.61711	4.8986	6.2188	6.37774	6.01781	3.23903	4.11635	4.24866	4.2868	3.40405	3.93628
Tpd52l2	3.52137	3.65025	3.3917	3.28386	3.81619	3.00545	4.35715	4.36448	3.87539	4.79015	5.00255	3.96744	5.13671	5.07954	3.89782	4.94863	4.84414	4.35013	4.91786	4.89468	4.95056	5.67048	4.78342	3.66905
Fmr1	1.20892	0.881817	1.39869	0.923704	0.672624	0.864855	0.697027	0.724313	0.856132	0.935628	0.617229	0.899808	0.664923	0.74202	0.647193	0.965597	0.578307	0.769594	0.518209	0.563092	0.461345	0.439288	0.380506	0.392896
Bcl11a	0.0482482	0.063196	0.0537458	0.0324901	0.0642095	0.0523949	0.0377536	0.0234408	0.0265443	0.0490997	0.077173	0.0525252	0.147445	0.1902	0.0521798	0.195035	0.294498	0.115409	0.153275	0.140568	0.181819	0.168528	0.224521	0.124438
Il4	0.037881	0.0954275	0.0248407	0.0361761	0.0868144	0.0242163	0.117561	0.172261	0.129089	0.167595	0.145417	0.139228	0.124545	0.187007	0.110613	0.173867	0.118191	0.147928	0.0169127	0.0294806	0.011479	0.0462118	0.0249994	0.0198798
Pxmp4	1.02626	1.32971	0.998611	1.44377	1.52185	1.328	0.945203	0.973516	0.756277	0.560018	0.875469	0.751028	0.648524	0.849838	1.27458	0.251043	0.868401	0.502748	2.86002	2.6743	3.32052	3.1097	3.75233	3.23147
Dlg3	0.382185	0.321582	0.386308	0.292958	0.312927	0.296033	0.5227	0.529562	0.328484	0.712418	0.693812	0.410083	1.30569	1.2005	0.480525	1.19315	1.06211	0.863055	0.303582	0.361299	0.211375	0.270143	0.323013	0.223538
Gnb1l	0.0279782	0.0208017	0.0544672	0.0306155	0.0294667	0.0433169	0.021707	0.0145783	0.0209666	0.0227542	0.0214432	0.0155133	0.0419209	0.0382295	0.0122923	0.0383849	0.0404136	0.0265554	0.0487946	0.0285781	0.0198707	0.0580703	0.0331776	0.0412955
Dbh	0	0	0	0.00526424	0	0	0	0.00501337	0	0	0.0141071	0	0.0135925	0	0	0	0.0305755	0.00478355	0	0	0	0	0.0109135	0.00578568
Mmp11	0.447671	0.219284	0.227511	0.27789	0.301753	0.221793	0.0463104	0.108574	0.0565022	0.180586	0.0620576	0.0851054	0.269839	0.183116	0.0919886	0.205473	0.129329	0.220142	0.359769	0.487756	0.244182	0.473307	0.369298	0.25843
Smarcb1	2.31497	2.07176	2.21513	2.28387	2.49858	1.96836	4.86624	4.66907	3.0033	5.22807	5.33487	3.43404	5.78567	5.17781	3.12434	5.55032	4.60131	3.89815	5.15714	3.99034	3.84085	5.07634	4.06796	2.85732
Vpreb3	0.0180072	0.0126008	0.0147604	0.0143307	0.0242755	0	0	0	0	0	0	0.022822	0.123342	0.0380984	0.00973729	0.0359348	0.031213	0.0130221	0.0200992	0	0.0272834	0.0610205	0	0
Hip1r	0.0781648	0.0390691	0.0274591	0.0622059	0.0501781	0.0654352	4.42994	3.61373	3.02306	3.95225	3.72295	3.21724	3.74012	3.49126	3.21029	2.94141	2.93557	3.24888	1.06772	0.764736	1.14483	1.13265	1.18829	0.86599
Nsun5	1.31822	1.46862	1.43598	1.11809	1.90569	1.41374	1.32778	1.14369	0.809993	1.21879	1.41491	0.648488	1.80584	2.25076	1.20991	1.52298	1.74378	1.26686	1.3552	1.68733	1.01178	1.81031	1.43084	1.09231
Top1mt	0.398616	0.43942	0.644536	0.434562	0.345981	0.493069	0.499914	0.533872	0.34804	0.259351	0.331894	0.391009	0.310437	0.288823	0.383855	0.190695	0.29026	0.264571	0.2377	0.259225	0.223382	0.277557	0.243245	0.138506
Hoxa10	0	0	0	0	0	0	0	0	0	0	0	0	0	0	0	0	0	0	0	0	0	0	0	0
Hoxa4	0	0	0	0	0	0	0	0	0	0	0	0	0	0	0	0	0	0	0	0	0	0	0	0
Gm38393	0.034599	0.0322814	0.0189071	0.0428321	0.0336866	0.0153599	0.379791	0.43996	0.533728	0.397696	0.379189	0.404396	0.305452	0.31992	0.212038	0.349061	0.370942	0.264107	0.137311	0.176518	0.125231	0.158932	0.161737	0.158037
Mmp14	0.509891	0.755936	0.58797	0.60524	0.547576	0.483415	0.782263	0.615698	0.190884	0.978378	0.575967	0.394307	1.71075	1.6578	0.598172	1.87121	1.503	1.80617	5.46941	6.26167	5.02815	8.03597	5.99569	3.96092
Slc7a7	1.87597	2.07663	2.26124	1.9606	2.76102	2.28693	0.031793	0.0260883	0.0294803	0.0447912	0.0327722	0.0498573	0.0387341	0.0346793	0.0146247	0.0294389	0.0483002	0.0391165	0.0493977	0.130115	0.0707795	0.0949809	0.0588191	0.0709669
Oxa1l	7.94649	8.07281	7.71504	8.38926	8.93628	8.69227	5.65416	4.5858	3.13954	7.04232	6.53084	5.38495	8.48224	8.18345	5.05317	7.78134	7.20947	6.63143	9.57504	7.25165	8.91287	8.46569	8.14145	6.73879
Heatr6	1.26922	1.33637	1.29965	1.19573	1.72702	1.45656	1.33547	1.26162	1.07793	1.78277	1.72022	1.10997	1.53018	1.8655	1.33843	1.81085	1.45982	1.59265	1.00623	1.06161	1.20115	0.962021	1.03071	0.933757
Ccl3	20.4503	36.5464	69.3731	21.7834	60.4928	94.8446	0.162733	0.298065	0.694913	0.10235	0.629043	1.3956	0.215501	0.110942	0.127597	0	0.181783	0.455042	0.0877928	0	0.357519	0	0.064885	0.206389
Wfdc18	0	0	0	0	0	0	0.263491	0.193046	0.353627	0.265154	0.706175	1.00072	0.314038	0.682603	1.29469	0.203318	0.382637	0.442071	0	0	0	0	0.0840474	0.133671
Icam4	0	0	0	0	0	0	0	0	0	0	0	0	0	0	0	0	0	0	0	0	0	0	0	0
Ilf2	2.25998	1.86651	2.79067	2.59363	1.9483	2.34073	6.56215	6.33681	4.79277	6.89765	6.97627	6.27554	6.43777	5.84861	4.0858	6.26169	5.66028	5.19758	5.29407	4.03093	3.43153	5.40355	4.00071	2.72328
Chtop	11.3301	8.2597	10.9321	9.43851	8.29817	8.03581	24.5085	21.4807	15.1183	27.9537	22.9732	25.2899	27.0271	21.5464	11.8998	25.0624	17.1639	18.629	12.5835	13.0816	10.0523	12.1562	12.1087	8.8056
Snapin	37.8637	32.6631	30.8423	38.9402	31.9958	30.1618	47.7142	45.7116	48.1383	48.396	50.5323	60.8111	31.7555	39.4692	44.6892	31.2336	34.7797	36.8422	39.8803	42.7243	39.5832	48.8051	47.3741	39.5824
S100a4	0.522637	0.621726	0.385563	0.582302	0.493197	0.584689	2.43295	1.90133	0.791567	3.2304	2.39641	2.35145	5.40556	5.82366	2.51525	8.70875	3.3519	7.10547	2.74177	2.60313	3.04869	3.54209	1.76767	1.55424
S100a3	0	0.00460927	0.00539926	0	0	0.00526355	0.6814	0.609055	0.394895	0.959981	0.579467	0.609413	1.3445	1.09631	0.409611	1.45906	0.825866	1.13369	0.0808737	0.0307574	0.0698606	0.111604	0.0543376	0.0345679
S100a5	0	0	0	0	0	0	0	0.0276559	0.0230276	0	0	0	0	0	0	0.0364093	0.0421668	0	0	0	0	0	0	0
S100a6	0.368145	0.471065	0.275901	0.47714	0.453756	0.302587	6.46878	5.54849	2.60203	10.1217	10.0104	7.81187	6.9453	8.82005	2.8382	7.85039	6.90394	8.19222	8.99315	8.00581	7.49829	10.9212	7.94812	4.34242
Scn4a	0.0034254	0.00239696	0.00561557	0.00272603	0.00923556	0	0	0.00259613	0	0.00222866	0	0	0	0.00241574	0.00185226	0	0.00395831	0.00247711	0.00382335	0.00533159	0.00259498	0.0162506	0.00282572	0.00299606
Icam2	0.205323	0.135695	0.0935012	0.145246	0.12302	0.0729208	0.00590003	0.0518718	0.0287939	0	0.0121635	0.0144568	0.0312527	0.0160891	0.037009	0.0113816	0.0197722	0.00824897	0	0	0.0345658	0.00773079	0.0188197	0
Mapk7	3.22933	3.82077	3.7442	3.71973	4.13865	4.12545	7.4945	6.55357	3.76748	8.47347	7.94053	4.46975	13.4609	13.6797	6.88155	14.4998	13.773	10.3707	5.45417	5.00987	4.61926	5.61555	5.53826	3.15905
Epn2	0.494897	0.548768	0.464954	0.489288	0.520907	0.433494	9.06364	8.56204	5.98562	8.93161	8.18583	6.38079	12.648	10.8479	6.97748	11.1486	9.70235	9.07114	1.10054	1.15249	0.967579	1.17264	1.12114	0.912351
B9d1	0.0152623	0.1602	0.112594	0.060731	0.164601	0.097568	2.82614	3.1926	1.57958	4.11106	2.90504	1.65384	4.65205	5.2096	3.49102	4.797	4.42682	3.94025	3.85001	3.63461	2.83275	3.96167	2.75729	2.46963
Sec24b	2.06189	2.35687	2.2638	2.01663	2.27231	2.2057	1.55487	1.50899	1.55058	1.79688	1.62206	1.55894	1.52182	1.65731	1.51787	1.59982	1.58002	1.46054	0.752554	1.06586	0.965553	0.914913	0.783892	0.654363
N4bp3	0.106946	0.0748368	0.175326	0.158063	0.0617889	0.146503	0.00790236	0.0231586	0.00964147	0.0596418	0.089603	0.00968152	0.136042	0.118522	0.0495689	0.121954	0.132412	0.0662908	0.136424	0.0356701	0.162038	0.196734	0.0882233	0.120268
Rmnd5b	1.65269	1.77555	1.85674	1.92647	2.04451	2.47039	2.32816	2.3578	1.42333	2.61863	2.64347	1.97137	3.64244	2.88644	1.93981	3.39507	2.81415	2.40438	2.89725	2.7918	2.9754	3.39319	2.45404	1.97274
Nhp2	3.10635	2.44542	1.98314	3.30409	2.99982	2.12424	5.9943	4.09742	2.28075	7.28753	6.43371	4.18298	6.03535	6.80389	2.00276	5.36449	5.59152	4.29838	8.96812	4.81175	4.54815	8.72476	5.24825	3.344
Vps9d1	5.50037	4.78518	6.23084	4.99256	4.95673	6.589	2.1786	2.02805	1.60734	3.00481	2.46234	2.05364	3.20409	3.24306	2.15971	3.21382	3.35556	3.29679	1.68142	2.04391	2.56772	2.18966	1.76592	1.647
Zfp276	1.13116	1.33706	1.31562	1.19217	1.78765	1.30699	3.98879	3.91581	3.22191	4.14226	4.03014	3.13843	2.68036	2.80825	2.62437	2.10479	2.36256	2.54245	0.69953	0.731613	1.08853	0.725183	0.573746	0.508058
C1ql4	0	0	0	0	0	0	0	0	0	0	0	0.0201856	0.0436374	0.0224649	0.0688996	0.0317837	0	0.0460713	0	0	0	0.0215886	0	0
Mfsd10	6.69143	6.28979	7.36781	7.9746	8.168	6.78359	1.96299	1.86711	0.924382	2.66416	2.28968	1.54001	3.32919	2.62953	1.85418	3.62066	4.42403	3.22598	4.68194	3.39398	3.68212	5.50518	3.62506	2.88269
Luzp1	0.69755	0.674953	0.585528	0.565143	0.648269	0.497086	0.23282	0.291355	0.168494	0.330152	0.245207	0.236517	0.374382	0.410116	0.20485	0.463076	0.487843	0.376056	0.404117	0.386206	0.346294	0.43012	0.424366	0.368028
Slc13a2	0.00945863	0.016547	0.0116298	0.0338736	0.0223146	0.0113375	0	0	0	0	0.00252151	0	0	0	0	0	0	0	0	0	0	0	0	0
Kctd10	0.645416	0.702001	0.569297	0.776045	0.761324	0.454081	0.377377	0.521066	0.274486	0.684661	0.418922	0.53347	0.418056	0.549178	0.337624	0.531991	0.575583	0.522545	0.438503	0.365799	0.488947	0.461193	0.462978	0.288396
Poldip2	2.35599	2.92651	2.60572	2.79002	2.89497	2.23396	4.89774	4.71607	3.17988	6.65955	5.78783	4.59319	5.37402	5.62857	4.09016	5.7476	6.8584	4.89117	8.06523	6.85162	7.5065	8.31982	7.36495	6.30038
Sebox	0	0	0.11924	0	0.0490265	0.174364	0	0	0	0	0.0387795	0	0	0	0	0	0.0420249	0	0	0.0566049	0	0	0	0
Ift20	4.88567	6.24975	4.7296	5.68269	6.21383	4.22208	9.22773	10.4719	9.11005	11.1184	14.4152	12.5241	9.93342	10.7421	10.9262	9.46298	11.4065	10.9831	7.22989	7.34641	6.68231	6.66731	8.8084	5.24011
Col6a1	0.0410386	0.0191448	0.0224261	0.0326597	0.0645448	0.0874496	0.0176889	0.0311034	0	0.0534017	0.0583477	0.0346743	0.192083	0.1833	0.0702726	0.245687	0.296395	0.173119	0.0152687	0.111783	0.0310895	0.0370843	0.033854	0.0717896
Pcbp3	0.00297075	0.00831526	0.00730532	0.00709262	0.00961167	0.00807126	0.0826681	0.074301	0.0393696	0.115971	0.10137	0.0741718	0.237669	0.278229	0.0922081	0.272112	0.261932	0.202802	0.0649911	0.0901666	0.0940728	0.0922126	0.0892042	0.0665189
Lgals9	10.4773	9.33392	10.0691	14.072	12.2031	12.1674	0.0727419	0.139385	0.167261	0.183002	0.250902	0.473017	0.0963292	0.0801085	0.0877473	0.199693	0.140638	0.226874	0.144899	0.181011	0.229473	0.131972	0.178484	0.21763
Araf	1.03865	1.06501	1.18696	1.03927	0.99905	1.07534	1.65874	1.69363	1.50229	1.83248	1.80987	1.37161	1.29953	1.28321	1.19195	1.38433	1.19367	1.11022	0.92449	1.10923	1.09843	1.23187	1.28991	0.938306
Cfp	3.81809	4.96182	2.87418	5.17793	4.45124	2.67741	1.01766	1.40258	0.860526	0.811152	1.44367	0.530805	0.707178	1.56615	0.695225	1.12734	1.23808	0.507139	0.739266	1.16734	1.52002	1.01658	1.83195	0.715614
Timp1	0	0	0	0	0	0	0.0269085	0.0197144	0.0656607	0.0338479	0	0.0494501	0.0356339	0.0733783	0.0281314	0.0519085	0.0150293	0.0752427	0.0290337	0.0607305	0.0197057	0.352581	0.236037	0.0910058
Uxt	0.0761281	0.114739	0.124804	0.0466039	0.0749976	0.0748719	0.0969263	0.0843277	0.096084	0.102872	0.0874224	0.12617	0.068189	0.115637	0.0759984	0.0584306	0.064287	0.118575	0.0718996	0.10482	0.0842902	0.0992204	0.0724621	0.0870743
Cnnm3	1.77146	1.95593	2.08882	2.16667	2.34406	2.39601	2.41459	2.28902	1.60815	2.51296	2.23734	2.06569	3.66002	3.39976	2.11996	2.77447	3.02864	2.74586	4.14901	4.01724	4.73551	4.64979	4.40198	3.56876
Lman2l	1.48794	2.15116	2.02125	1.4597	2.12258	1.95549	0.805919	0.886568	0.52855	1.03202	1.10266	0.676034	1.22429	1.30014	0.705915	1.17651	1.27875	1.0388	0.966187	0.997754	0.687671	0.960857	0.980413	0.806237
Mcm3ap	0.926875	0.94985	1.23512	1.04599	1.10613	1.14741	1.16579	1.13242	0.920532	1.12537	1.13148	0.890656	1.23678	1.05909	0.891482	0.993051	1.04766	0.963298	0.669917	0.652355	0.715601	0.753467	0.630907	0.500597
Pcnt	0.779133	0.721491	1.02823	0.787473	0.775508	0.945313	0.422475	0.379894	0.324513	0.54579	0.442409	0.381817	0.446506	0.445993	0.307557	0.465151	0.369892	0.362479	0.263794	0.220309	0.24692	0.319467	0.234597	0.253282
Ftcd	0	0	0	0.0193157	0	0	0	0	0	0	0	0.00512679	0	0	0	0	0	0	0	0	0	0	0	0
Mxd1	0.843578	1.06029	0.916096	0.855215	0.840244	1.0734	1.69807	1.71444	1.72591	1.1921	1.73891	1.8114	1.28812	1.29974	1.79849	0.713043	1.42497	1.63585	1.27743	1.02449	1.34733	0.910384	1.31644	1.07622
Gmcl1	0.49978	0.609524	0.699946	0.445469	0.537078	0.513476	0.630752	0.670992	0.571316	0.72095	0.704993	0.787239	0.663138	0.727087	0.557493	0.706694	0.622086	0.570013	0.223137	0.415622	0.235825	0.406462	0.372234	0.272274
Snrnp27	1.12874	1.73057	0.93562	1.03959	0.94035	1.09452	1.62685	1.4226	1.04046	1.83185	2.3058	1.69576	2.13699	2.11084	1.41274	1.79693	2.05911	1.54998	2.43481	2.27012	2.11373	1.86519	2.08198	1.68612
Oas1c	0.125407	0.189011	0.197684	0.168897	0.117043	0.208133	0.0199586	0.00731131	0.00608774	0.0188293	0.0462898	0.0366782	0.0132152	0.047623	0.0417313	0.0192508	0.0445901	0.0418568	0.0430698	0	0.0219242	0.0392275	0	0.00843761
Oas1h	0.00983432	0.00688167	0	0.00782644	0	0	0	0	0	0	0	0	0	0	0.00531784	0	0	0	0	0	0	0	0	0
Ocrl	0.615561	0.693547	0.797843	0.702105	0.63511	0.95004	0.791955	0.781491	0.681559	1.13499	0.877955	0.885765	1.14313	0.919957	0.805114	1.27718	1.04901	1.13135	1.09138	1.1864	1.41246	1.35247	1.15308	1.16428
Calm1	39.0357	42.1795	31.4812	42.8214	40.9847	31.7696	81.5744	82.5423	73.8087	73.8016	91.5654	80.1743	88.4959	104.676	81.6655	82.5605	99.5792	74.7918	51.9423	62.4607	50.1921	55.4028	56.8751	48.5954
Agpat3	1.12698	1.139	1.07813	1.35214	1.39331	1.33716	1.83655	1.74072	1.57364	1.92871	1.89539	1.6986	2.49266	2.41557	2.05501	2.23759	2.67715	2.24276	6.84523	6.16609	7.47205	6.936	7.26563	6.27868
Slc26a3	0	0	0.00117307	0.00341675	0	0	0	0	0	0	0	0.00272063	0.000980247	0.00605566	0.000773862	0	0.000826875	0.00206984	0	0.0111375	0.00542081	0.0096991	0	0.00125173
Sema6b	0.0413192	0.067465	0.118542	0.0931686	0.106763	0.115562	0.86912	0.965577	0.347669	1.48307	0.96932	0.741867	2.35377	1.71926	0.755941	2.26066	1.73482	1.44422	0.599553	0.476986	0.359974	0.569403	0.465835	0.331286
Uhrf1	0.123769	0.0742361	0.0917907	0.361163	0.174798	0.0518063	0.176811	0.120607	0.0148775	0.230079	0.201111	0.0672267	0.70647	0.914436	0.219904	0.870349	0.769607	0.468835	1.50647	0.715538	0.870661	1.44997	0.656364	0.69593
Dpp9	0.72572	0.785065	0.740551	0.786763	0.958376	0.83437	0.936508	1.03551	0.778096	0.980482	0.945608	0.659319	0.991637	1.06279	0.758828	0.919922	1.12102	0.741699	0.566195	0.599366	0.743328	0.622334	0.629214	0.388628
Ramp2	0.0615427	0.135348	0.0432396	0.0839614	0.124448	0.196713	0.936775	0.906217	0.260767	1.60737	1.20469	0.74098	2.69786	2.24453	0.765413	2.29836	2.27067	1.79293	1.87432	1.7516	2.25788	1.90672	1.7914	1.70715
Lsr	0.113592	0.0476924	0.0682814	0.0602667	0.0663579	0.0847192	0.0352525	0.0516553	0.0143369	0.0541979	0.0242254	0.0143964	0.0726187	0.0213627	0.0286646	0.0680046	0.0393793	0.0657163	0.0253578	0.0589349	0.0688431	0.0410588	0.124941	0.0529891
Gramd1a	5.82501	5.09918	6.56289	5.13122	6.36049	5.78615	2.27102	2.69502	1.36212	2.67964	2.83275	2.21241	3.0548	3.71448	1.60609	3.13846	3.56281	2.6782	2.00766	2.32586	2.18022	2.59124	2.51866	1.2344
Hpn	0.502224	0.416704	0.529291	0.79366	0.391721	0.745315	0	0	0.013583	0.00933602	0.0153011	0.00454649	0	0.00505985	0.00387963	0.0143175	0	0.00518841	0	0.0223344	0.0163058	0.0145875	0.00591858	0.0878551
Gabrg1	0.00129789	0.00635749	0.00319162	0.00413159	0.00612389	0.0062228	0.111439	0.0904983	0.0417719	0.172266	0.136322	0.115967	0.341375	0.284666	0.115099	0.401456	0.284214	0.34446	0.615685	0.710082	0.692201	0.687866	0.725914	0.818488
Ckb	77.3289	75.1195	46.926	94.6778	79.9209	45.8103	98.0421	83.3885	51.5459	128.183	129.477	74.4777	260.46	260.543	109.859	247.407	270.177	163.549	831.221	671.122	557.572	741.266	733.153	372.926
Sp1	7.14791	7.13997	8.80475	7.05751	7.25089	7.6639	3.18728	2.94982	3.13279	3.22222	2.78079	2.86955	3.08556	2.90827	2.60794	3.18985	2.63229	2.8146	1.86307	1.92559	2.60933	2.25982	1.9018	2.23285
Itgb7	0.111776	0.18772	0.158812	0.18977	0.221005	0.196503	1.06765	1.2312	0.474958	1.27995	1.54948	1.0483	0.234789	0.199701	0.141032	0.14127	0.520968	0.323328	0	0.0811897	0.101614	0.0454526	0.0184415	0.0195532
Myg1	3.97391	3.64736	3.4392	3.61855	4.18611	3.16075	3.14533	2.53556	1.97125	2.76592	3.20277	1.97944	3.92469	4.11913	1.91899	3.92824	3.80187	2.76685	5.26081	3.04952	4.25672	5.38651	4.11682	2.52199
Rarg	0.0579	0.136282	0.0431458	0.0628344	0.0709591	0.0210307	0.103457	0.0997335	0.0797211	0.164384	0.154352	0.0667103	0.371353	0.515987	0.125236	0.456924	0.425777	0.361613	0.246756	0.491567	0.44262	0.263984	0.412504	0.253214
Pfdn5	16.3707	15.6738	11.6422	17.0206	15.9885	13.5106	7.07942	6.54012	4.20798	7.68286	9.01449	5.66447	13.1363	14.0058	6.42996	11.3085	11.0452	9.58439	18.5952	13.849	11.9953	14.3409	13.0279	8.66713
Efnb2	0.0868135	0.127193	0.0956221	0.120905	0.131662	0.123569	0.179613	0.211782	0.0599213	0.421859	0.293627	0.146128	0.732145	0.774873	0.252323	0.793129	1.09411	0.570907	0.405765	0.422263	0.466536	0.536883	0.42074	0.448475
Rrp15	0.527654	0.342858	0.42565	0.493242	0.434701	0.418298	0.318409	0.269782	0.187635	0.517684	0.3885	0.334369	0.642525	0.531605	0.165308	0.568272	0.336327	0.330096	0.378613	0.309612	0.250627	0.363285	0.17273	0.161165
Rnd2	0.398818	0.570288	0.568537	0.551984	0.970101	1.06693	70.8449	65.1712	47.0972	89.8033	112.069	78.9606	24.8706	23.6995	23.9099	24.4644	42.0488	41.3052	28.1993	26.2876	20.8734	23.1629	24.3172	18.5638
Srr	0.715914	0.534933	0.42769	0.550432	0.678858	0.60117	2.51677	2.49685	2.51165	2.84607	3.00832	2.55284	3.02949	3.01224	2.6213	2.92997	3.19348	2.79043	2.01803	2.42693	2.97835	2.71794	2.49745	2.44635
Sync	0	0.00397121	0.00930368	0.0135492	0	0.0136048	0.0146768	0.0129035	0.0214882	0.0147695	0.0272319	0.0179812	0.0272103	0.0680393	0.0245501	0.0226502	0.019674	0.024624	0	0.0176664	0.0128978	0.0423082	0.0936312	0.00992755
Fndc5	0.187803	0.219028	0.24374	0.161914	0.232078	0.287637	1.03614	0.723544	0.29629	1.58846	1.12646	0.83306	3.81622	3.48775	1.21017	4.30991	4.66593	3.20289	21.3988	18.8054	12.1881	18.9541	18.152	12.9494
Acp5	0.277805	0.231425	0.162654	0.263197	0.321008	0.264276	0	0	0	0	0	0	0	0	0	0	0.00764344	0	0.0295314	0	0	0.00896562	0	0
Cnn1	0.0114123	0	0	0.00908225	0.00769246	0.0273584	0	0.0172989	0	0.0148503	0	0	0.0156339	0	0.00617113	0.0455483	0.0197816	0.00825293	0	0.00888155	0	0.015469	0	0.00998189
Fbxo9	0.857966	0.823625	0.890574	0.627897	0.996789	0.678704	1.3001	1.32992	0.862487	0.920075	1.29186	1.1748	1.26984	1.38346	0.9815	0.97222	1.02383	0.916641	0.813272	0.818696	0.685896	0.774323	0.786009	0.56565
Vps50	0.8511	0.839963	1.14328	0.829348	0.717676	0.968227	0.579945	0.597081	0.61271	0.661852	0.612872	0.671839	0.495483	0.528491	0.457171	0.576296	0.474122	0.50105	0.227086	0.210232	0.235473	0.317136	0.265735	0.232323
Hars	1.59632	1.66061	1.31434	1.44054	1.4747	1.23005	3.88511	3.32172	2.43302	3.07411	3.55261	2.73215	3.70003	3.68899	2.65897	3.37047	3.3517	2.89115	2.58517	2.52903	2.1811	2.9945	2.03408	1.73907
Zmat2	4.68001	3.8638	3.19682	4.57394	4.1369	3.10007	5.99861	6.65842	3.8472	5.5824	5.48293	4.47453	7.01578	7.64336	3.57404	6.65633	6.15528	4.24535	7.76684	6.15019	5.84685	6.27405	5.16452	4.18319
Ube2c	0.466122	0.400728	0.174664	2.04554	0.332143	0.223485	0.70951	0.474399	0.109257	1.22175	0.752662	0.118151	5.39116	6.537	1.23866	9.14237	4.80927	2.58108	7.2541	5.67973	5.10509	8.09623	4.16379	2.74905
Smg5	1.4766	1.37769	1.38593	1.28393	1.61275	1.64608	1.3012	1.37817	1.12165	1.32246	1.56725	1.17829	1.50462	1.6456	1.26176	1.46878	1.59046	1.50944	1.20558	1.479	1.68139	1.61539	1.54517	1.22774
Cct3	2.68059	2.67872	2.08662	2.37118	2.60954	2.11893	5.06971	4.32271	2.67133	5.68704	5.06904	4.52468	5.76916	4.73297	2.38283	4.84904	3.8971	3.58762	4.20281	3.38062	2.86713	4.09418	2.7005	1.83858
Glmp	17.1375	17.7833	11.9721	19.6533	23.2686	13.9058	6.24498	6.01457	4.00641	6.25735	7.74693	4.28647	9.56418	10.4071	7.18269	9.10597	10.5896	7.62446	22.777	23.2187	20.4834	20.156	27.6822	14.8242
Mef2d	4.49169	5.68446	6.2522	5.16617	6.50547	5.90648	2.49084	3.09204	2.20354	2.41756	3.28408	2.35463	2.90128	4.49067	2.65811	3.13683	5.03333	3.43333	2.59827	2.77035	3.17551	2.38546	3.74163	2.70776
Tmem79	0	0.0221981	0.0260026	0.0378684	0	0.0126745	0.00820399	0.0601063	0.0100095	0.0206394	0.0169133	0.0201021	0.0217284	0.0783017	0.00857682	0.0791305	0.0366575	0.0573509	0.0177038	0.0246877	0.0120159	0.0107496	0.0261688	0
Snd1	0.186788	0.143001	0.19144	0.201081	0.176928	0.19055	0.213272	0.17368	0.139397	0.190783	0.179481	0.133591	0.170589	0.150498	0.150878	0.14745	0.136136	0.128913	0.125439	0.0826359	0.115279	0.142351	0.106135	0.0745701
Col18a1	0.00727406	0.00145432	0.00425893	0	0.00140088	0.00415189	0.0155871	0.0196895	0.00918085	0.0297484	0.0210535	0.011853	0.0676185	0.0578954	0.0269719	0.0487321	0.0354241	0.0766503	0.0115987	0.0307311	0.0283402	0.0260579	0.0162874	0.0172692
Slc19a1	0.400828	0.494462	0.467432	0.420937	0.621132	0.462287	0.369762	0.300658	0.174718	0.575351	0.451652	0.308991	0.577405	0.845129	0.308359	0.779269	0.596891	0.690293	0.701072	0.565998	0.848356	0.74215	0.722671	0.581905
Kpnb1	15.27	13.8682	15.422	14.5331	13.5293	13.6621	11.3268	11.3238	9.52723	9.66055	9.17403	9.80211	7.94779	7.18333	6.92697	7.34657	5.64621	6.07209	4.09263	4.40018	4.61892	5.23884	4.29868	3.73482
Npepps	1.13134	1.00849	1.14226	0.997722	0.99178	0.931977	1.18596	1.11516	1.02781	1.41116	1.10218	0.943471	1.25815	1.12284	0.786185	1.21128	0.942868	0.9905	1.11911	1.12901	0.952162	1.33965	1.0093	0.904759
Tbx21	0	0	0	0.00547987	0	0.00550233	0.00356156	0.00521873	0	0	0.00367124	0.00872683	0.00943286	0.0194244	0.00372341	0.0206115	0.00795697	0.0497949	0	0	0	0.0186668	0	0
Mrpl10	1.83249	1.55398	1.10747	1.56958	1.73764	1.06722	2.04025	1.63602	1.47983	2.42495	2.16932	1.41709	2.95711	2.70517	1.74668	2.99058	2.62005	1.89793	3.1894	3.44445	2.54118	2.94697	2.94649	2.0103
Cyp51	0.845999	0.778758	0.879209	0.745407	0.695835	0.696151	31.3705	31.1472	26.3191	10.5368	17.0462	16.2904	13.7935	15.4166	23.2873	5.89885	7.91984	8.1973	11.1234	9.22926	8.78188	10.9451	8.01744	7.5758
Tcf25	8.77076	7.62203	9.61818	8.41376	8.34594	8.82395	11.7399	11.3395	9.63878	12.6108	11.3916	9.54363	11.4658	11.6327	9.39787	10.9865	10.9936	10.1797	9.90435	8.16327	9.22142	11.1361	8.82248	7.3397
Tubb6	1.02727	1.22342	0.720602	1.52502	1.26502	1.14451	0.143054	0.157213	0.0997353	0.237786	0.163259	0.131446	0.419477	0.257747	0.165579	0.512502	0.125558	0.45716	1.23482	1.62969	0.897958	1.3121	0.70076	0.561573
Def8	0.212319	0.217627	0.186293	0.240365	0.310415	0.24613	0.726972	0.75246	0.573693	0.939744	0.830674	0.744731	1.12861	1.01441	0.782649	0.993604	0.962395	0.763378	1.01803	0.886688	0.783841	0.944442	0.883144	0.627742
Meox1	0.0140948	0	0.0115535	0.0168256	0.0190013	0.00563154	0.0947749	0.144214	0.0400266	0.165069	0.172843	0.0625223	0.429619	0.432402	0.160056	0.393783	0.309465	0.346556	0.0471969	0.0109692	0.0694058	0.0238814	0.1279	0.0493128
Sost	0	0.01825	0.0213779	0.0207554	0	0.0416811	0.040469	0	0	0.0509056	0	0	0.0178639	0	0	0.0780678	0	0	0	0	0	0	0	0
Nkx2-1	0	0	0.0196806	0	0.0485511	0.0191859	0.0993494	0.254758	0.106062	0.499883	0.384034	0.0760733	0.657823	1.20222	0.220712	1.24574	1.04043	0.572973	0.589577	1.00901	0.600235	0.943784	0.237676	0.483006
Pax9	0	0	0.00462688	0	0	0	0	0	0	0	0	0	0.00386633	0	0	0	0.0032614	0	0	0	0	0.00765112	0	0
Irx2	0	0	0	0	0.0148957	0.017659	0.537227	0.318228	0.292864	0.9202	0.648031	0.350096	2.20997	1.96372	0.585541	1.764	1.02148	1.21456	0.789319	1.23828	0.251121	0.688949	0.947963	0.38658
Col1a1	0.120134	0.18791	0.075303	0.213708	0.0952661	0.0847041	0.00365516	0.0107118	0.00891913	0.0367823	0.0113032	0.0268686	0.0919673	0.0398699	0.0191064	0.169226	0.142907	0.0613243	0.512699	0.291479	0.176666	0.316096	0.291477	0.210153
Itga3	0.0147057	0.0180083	0.0120542	0.0117032	0.0148686	0.0176268	0.211076	0.156037	0.0603219	0.258334	0.13329	0.235301	0.31981	0.344838	0.15904	0.308137	0.433335	0.393479	0.180555	0.131613	0.314721	0.169431	0.115246	0.122194
Sgca	0	0	0	0.013975	0.00591824	0	0.00454141	0	0.00554085	0	0	0.0166916	0	0.00619211	0	0	0	0.00634944	0.117602	0.122995	0.146334	0.136863	0.123131	0.191991
Dlx3	0	0	0	0	0	0	0	0	0	0	0	0	0	0	0	0	0	0	0	0.0357321	0.0347828	0.0155586	0	0
Foxm1	0.946886	0.807734	0.731806	2.26786	0.832762	0.85033	0.81161	0.751824	0.500803	1.33775	0.730827	0.520028	4.2559	4.08938	1.51656	5.4798	2.7407	2.51075	3.73435	2.37916	3.70963	4.29047	2.47726	2.30319
Itfg2	0.483464	0.488669	0.748553	0.37254	0.522441	0.521242	1.06774	1.19813	0.765168	1.31813	1.05562	1.03581	0.967174	1.19606	0.813338	1.33999	1.22377	1.08771	0.805163	0.740561	1.04645	0.790544	0.784989	0.724914
Nrip2	0.0277503	0.0534012	0.113734	0.0386479	0.0748204	0.0776127	0.147123	0.162999	0.240795	0.148955	0.144257	0.184644	0.294621	0.205492	0.217584	0.249201	0.204431	0.160544	0.0542049	0.0107983	0.0946025	0.150459	0.0801225	0.0788844
Tulp3	0.11991	0.143843	0.185346	0.0927012	0.173197	0.104032	0.460733	0.472577	0.328629	0.323212	0.407337	0.267035	0.483412	0.577461	0.459441	0.413629	0.374125	0.490554	2.01525	2.36497	2.02962	2.34977	2.31749	1.67509
Gtf2h4	1.04825	0.941125	0.648486	0.991629	1.06652	0.568968	1.2583	0.959364	0.43685	1.00373	1.21269	0.726931	1.63922	1.11588	0.513359	1.0854	1.29132	0.672235	2.27383	1.32374	1.18369	1.74257	1.04421	0.830366
Tubb5	86.3509	74.7821	55.541	137.528	88.1476	67.1831	77.3698	73.0462	30.1543	100.726	90.0847	56.712	131.307	126.174	35.5259	144.79	102.447	73.304	142.184	95.5088	97.6323	152.939	85.8336	63.248
Ell2	0.161224	0.131833	0.151458	0.125424	0.158736	0.12449	1.918	2.02099	2.41441	0.892214	1.32416	1.52446	0.766818	0.78825	1.79064	0.390421	0.589274	0.740157	0.11323	0.0775388	0.0905746	0.0626138	0.0552918	0.0617938
Jup	3.75873	3.83128	3.29746	3.87458	4.10489	3.50472	0.712786	0.900597	0.846218	0.373139	0.739137	0.462778	0.627392	0.750725	0.919203	0.613406	0.95595	0.650451	1.51053	1.32614	2.25049	1.44848	1.61672	1.42187
Fkbp10	0.0260431	0.100232	0	0.113992	0.114103	0.0416217	0.0471466	0.0394764	0.0575224	0.0169444	0.0416559	0.0247549	0.0802728	0.0918335	0.154909	0.246863	0.165521	0.122417	10.3775	6.79987	10.0423	9.75179	8.91577	6.85644
Klhl10	0.0236043	0.027529	0.00644944	0.0125233	0.0159105	0.018862	0.0284877	0.0655961	0.0297918	0.0767881	0.0377551	0.0398875	0.0754504	0.0332935	0.034037	0.0392536	0.0227304	0.0512091	0.0790396	0.0796029	0.047685	0.0426598	0.019472	0.00688192
Mnx1	0	0	0	0	0	0	0	0	0	0	0	0	0	0	0	0	0	0	0	0	0	0	0	0
Nom1	1.66127	1.05486	1.68116	1.62405	1.29259	1.27015	0.989224	0.944316	0.860704	1.12424	0.904872	1.00724	1.09224	1.07758	0.632153	1.21762	0.799885	0.756417	0.703937	0.877879	0.621496	0.882651	0.680989	0.578529
Ergic1	0.537925	0.521061	0.423582	0.538093	0.591723	0.613931	0.405759	0.354846	0.169733	0.652988	0.452778	0.340088	0.881904	0.834256	0.397266	0.93556	0.921626	0.776211	0.910356	0.887664	0.894268	0.912268	0.880312	0.673078
Tnk1	0	0.0322971	0.0504434	0.0489748	0.0414805	0.0245878	0.0318304	0.0699614	0	0.0600587	0	0.0292476	0.0210759	0.0651001	0.0831924	0.0153508	0.0711132	0.0667542	0	0	0.0233101	0.0312804	0.0253829	0.026913
Acap1	0.0425307	0.0178568	0.0697244	0.0203083	0.0401349	0.0883634	0	0.0322342	0.0322077	0.0110686	0.0226759	0.00539025	0.00582634	0.0179967	0.00459964	0.00848733	0.00491474	0.0184539	0.00949433	0	0.00644398	0.0115298	0	0.0297599
Tcea3	0.00437439	0.00612205	0.00358566	0.00696253	0.0117942	0.00699108	0	0	0	0	0.00233228	0	0.00599253	0	0	0	0	0	0.00488258	0.0612781	0.00662779	0.0385407	0	0.0038261
Csn3	0	0	0	0	0	0	0	0	0	0	0	0	0	0	0	0.0167351	0	0	0	0	0	0	0	0
Ifrd1	0.407663	0.402209	0.552089	0.211585	0.423272	0.337901	0.704608	0.698541	0.535299	0.55848	0.598056	0.577637	0.575807	0.475002	0.438144	0.467397	0.313081	0.424814	0.862001	0.926166	0.809487	0.871763	0.777028	0.806151
Stk38l	0.159002	0.14217	0.1955	0.107207	0.17416	0.121764	0.17248	0.184111	0.147725	0.191098	0.167195	0.219709	0.157314	0.197794	0.139717	0.220349	0.173531	0.11179	0.406713	0.525906	0.445015	0.396622	0.431755	0.40563
Brpf1	5.37138	4.69249	6.40921	5.10723	5.0444	6.36065	1.58511	1.71277	1.34996	1.863	1.65895	1.40231	1.85107	1.61267	1.42145	1.79319	1.59632	1.58576	1.55686	1.41429	1.77297	2.16786	1.72041	1.35489
Akr1b3	1.1297	1.0227	1.22389	1.15682	1.2567	1.14262	0.637444	0.449059	0.408806	0.601376	0.648651	0.535658	0.752152	0.618427	0.427188	0.733077	0.639033	0.531307	0.343894	0.338147	0.520677	0.449745	0.234611	0.297122
Hoxc13	0	0	0	0	0	0	0	0	0	0	0	0	0	0	0	0	0	0	0	0	0	0	0	0
Hoxc11	0	0	0	0	0	0	0	0	0	0	0	0	0	0	0	0	0	0	0	0	0	0	0	0
Hoxc8	0	0	0	0.0269927	0	0	0	0.0257064	0	0.0220678	0	0	0	0	0	0	0	0	0	0	0	0	0	0
Hoxc6	0	0	0	0	0	0	0	0	0	0	0	0	0	0	0	0	0	0	0	0	0	0	0	0
Gstt1	0	0.00563029	0	0.00640326	0.0325405	0.012859	0.112366	0.164649	0.0355431	0.251278	0.231653	0.127467	0.727475	0.675252	0.26105	0.722541	0.883288	0.541126	1.93086	1.82217	1.87739	2.09397	2.34965	1.34417
Gstt3	0.390786	0.250669	0.240244	0.310999	0.307311	0.364319	0.00842204	0.0246815	0.020551	0.010594	0.0434071	0.0206364	0.0446119	0.0918662	0.0528287	0.0324935	0.169343	0.129525	2.3445	2.4837	2.097	2.5271	2.43122	1.68054
Ddt	1.74136	2.13244	1.60581	2.42519	2.53092	1.34802	2.56135	3.01076	2.78163	3.39893	2.95938	2.86215	5.3674	5.21934	3.00144	3.96369	4.55905	4.60425	18.7077	14.9072	12.6561	15.3792	13.6917	10.0429
Tat	0	0	0	0	0	0	0	0	0	0	0.00676549	0	0	0	0	0	0	0	0	0.029626	0	0	0	0
Marveld3	0	0	0.0204533	0	0	0	0.0387187	0.0126076	0.0104977	0.0811732	0.0354766	0.0368947	0.102547	0.0410606	0.022488	0.0497942	0.0816969	0.120297	0.0092837	0	0.00630102	0.005637	0	0
Ddx18	0.62136	0.793223	0.798402	0.75511	0.888594	0.838723	0.486429	0.604575	0.339131	0.617337	0.590947	0.542736	0.661413	0.657314	0.376861	0.636743	0.664661	0.595076	0.599824	0.4705	0.496167	0.608912	0.394825	0.337838
Ubl3	4.73871	4.36256	4.87964	4.61776	4.35366	4.2383	11.1624	10.7502	9.38096	6.85033	9.82447	8.53159	4.43425	5.24266	6.39271	3.11275	5.00249	4.64587	1.9201	2.57382	1.73512	2.28323	2.0421	1.64711
Gramd3	0.0413563	0.0546636	0.0527327	0.0521116	0.04104	0.0486533	1.52768	1.50452	1.37235	1.26017	1.65251	1.85197	0.498088	0.721054	0.882102	0.243004	0.592069	0.543315	0.910395	1.1837	0.945129	0.880564	1.05665	0.834987
Eef1e1	0.440147	0.414397	0.446063	0.356651	0.512449	0.338928	1.14658	1.1524	0.732283	1.50475	1.45923	1.01424	1.25526	1.33194	0.601508	1.17379	1.04499	1.12272	0.857509	0.622803	0.460756	0.602029	0.567743	0.468975
Akt1	5.64249	5.07369	4.37074	6.21928	5.42733	4.87859	2.55077	2.23232	1.32461	4.08233	3.45062	2.71029	4.46005	4.12257	1.99544	4.23377	4.15996	3.57037	4.23226	3.64472	4.17198	4.45891	3.08605	2.5614
Cldn15	0.0128595	0	0.0105409	0.010234	0	0.0102759	0	0.0194926	0.00811523	0.0167335	0.0137125	0.00814895	0.00880822	0.0544145	0	0.0128311	0	0	0	0.100078	0	0.00871533	0.0636494	0
Il16	0.572866	0.559277	0.616317	0.500942	0.550405	0.585137	0.00657134	0.00612751	0.00583092	0.00375728	0.00862109	0.0168336	0.00395553	0.00977441	0.00499635	0.0184387	0.00934259	0.021716	0.00902405	0.0035954	0.00787473	0.013307	0.0190555	0.00808166
Tcirg1	33.5429	32.259	38.7285	34.7847	39.2198	42.8022	1.93575	2.51948	2.03016	1.76517	2.42988	2.09296	1.42495	1.37639	2.18028	1.16627	1.28874	1.72156	1.7116	2.32003	1.78722	2.27477	1.97268	1.80084
Naglu	6.68712	7.41537	7.13472	7.1863	9.10903	9.29866	0.963015	0.964253	0.773509	0.91862	0.90995	0.875042	1.42407	0.831599	0.813814	1.06819	1.06679	0.762967	1.76642	0.784858	1.08136	1.5142	1.67669	0.909235
Coasy	7.03588	6.50304	6.94476	6.25262	6.69883	6.37196	9.90171	9.33193	7.82571	9.61325	9.90967	7.98826	8.8755	9.36577	8.79815	6.99107	8.01191	6.14809	11.9435	10.5406	8.8836	11.5238	11.1729	7.2566
Smo	1.95766	1.84261	1.97007	2.37352	2.48115	2.23269	0.164009	0.188078	0.0928015	0.364772	0.271966	0.171814	0.550846	0.401873	0.305651	0.724477	0.693006	0.634742	3.80597	4.01986	5.00273	4.54094	3.73028	3.86672
Tspan33	0.336956	0.290464	0.312227	0.322568	0.444375	0.370719	0.04294	0.0407128	0.0215724	0.0254183	0.0312441	0.043324	0.0702435	0.10332	0.0158441	0.0341084	0.104398	0.0494409	0.250734	0.31164	0.266366	0.244915	0.302137	0.183667
Crnkl1	3.04998	2.16746	2.83895	2.28703	1.86853	1.81437	1.56705	1.40751	1.41148	1.6669	1.33344	1.49466	1.48559	1.10895	0.86861	1.25111	0.834128	0.999885	0.930513	0.854507	0.682902	1.0611	0.66535	0.575038
Rin2	1.02732	0.884505	1.15627	0.850081	0.806746	0.94478	0.237033	0.238758	0.142303	0.352405	0.345765	0.286498	0.232641	0.282938	0.124054	0.21774	0.206264	0.218506	0.274177	0.349676	0.309866	0.229429	0.300031	0.267218
Folh1	0	0.00291981	0.00513037	0.00332067	0.00140627	0.00166714	0.0582718	0.0869666	0.122443	0.0705847	0.0567294	0.0489163	0.13147	0.141249	0.150044	0.168616	0.100051	0.123715	0.449433	0.478975	0.575305	0.414288	0.478452	0.58211
Chordc1	1.68998	2.57868	2.01248	1.18803	1.82577	1.05785	1.2699	1.84299	1.43088	1.4233	1.95225	1.32973	0.935696	1.40042	0.781845	0.763493	1.1419	0.865672	0.492537	0.86585	0.458765	0.563133	0.689313	0.488613
Rtcb	6.4237	4.12661	5.66153	6.6404	5.28188	5.59843	5.94347	5.20189	2.78723	6.83541	5.19185	3.64276	7.21729	6.48304	2.67301	6.84834	5.24339	4.40795	4.23146	3.148	3.27085	4.08067	3.1018	2.34061
Pwp1	0.348954	0.318137	0.357953	0.27136	0.337362	0.356923	0.520848	0.485121	0.383801	0.669441	0.568783	0.487746	0.603692	0.572351	0.363372	0.694375	0.485043	0.556611	0.37614	0.282434	0.270399	0.354071	0.282928	0.176153
Fbxo7	1.0692	1.07638	1.32277	0.999568	0.865366	1.01319	4.59692	4.70846	3.03506	5.96861	4.961	4.0879	4.8515	4.42334	2.63074	4.52908	3.61934	3.71941	0.842929	0.74239	0.797945	0.810832	0.849226	0.761358
Capns1	21.6778	22.6279	21.6824	27.3194	29.831	25.664	23.9937	25.0239	20.5203	24.6205	30.7036	18.4682	28.0035	26.9342	27.4166	24.5059	27.7913	26.1348	33.9708	33.492	35.7487	34.8913	36.2278	28.2923
Lrp3	0.0460918	0.0537554	0.0125937	0.0427948	0.0828485	0.092079	2.39993	2.25901	1.1247	3.36372	2.81789	2.03969	5.39336	4.58875	2.21822	5.23519	5.2508	4.73311	2.88958	2.218	2.12998	3.26957	2.30037	1.9351
Dsg4	0	0	0	0	0	0	0	0	0	0	0	0	0	0	0	0	0	0	0	0	0	0	0	0
Evx2	0	0	0	0	0	0	0	0	0	0	0	0	0	0	0	0	0	0	0.0404066	0	0	0	0.0149317	0
Hoxd13	0	0	0	0	0	0	0	0	0	0	0	0	0	0	0	0	0	0	0	0	0	0	0	0
Hoxd12	0	0	0	0	0	0	0	0	0	0	0	0	0	0	0	0	0	0	0	0	0	0	0	0
Folr1	0.00954064	0	0	0.0227782	0.00643086	0.00762385	0	0	0	0	0	0	0.0130699	0	0	0.0190391	0.00551246	0	0.0638941	0.0445496	0.144554	0.142252	0.118056	0.0667585
Clpb	0.100036	0.0996419	0.0768282	0.0853497	0.11785	0.105864	0.208369	0.214476	0.133653	0.197605	0.179709	0.189605	0.25865	0.236437	0.162769	0.287756	0.240051	0.223544	0.223316	0.187969	0.188437	0.26203	0.225266	0.186031
2021-09-07	1.65784	1.39122	1.51685	1.55189	1.2402	1.36706	7.24874	7.85824	12.0334	7.45402	7.47988	10.845	3.38489	4.00925	7.48428	3.18793	2.85773	4.78022	1.15564	1.46322	1.19177	1.3216	1.33442	1.65376
Zdhhc4	1.1357	1.30281	1.0988	1.53353	1.31142	1.44311	1.51189	1.19235	0.928186	1.43543	1.40956	1.168	1.76622	1.82509	1.32388	1.84839	1.70502	1.78395	2.26512	1.86912	1.99577	2.59931	2.20395	1.64472
Rac1	24.0988	28.284	21.9414	27.5236	27.0708	24.9549	30.5977	29.4271	29.2234	38.9607	42.3996	42.5852	22.4514	26.5511	25.3225	24.1038	28.2138	30.4485	18.282	21.7453	20.6142	21.1782	18.9035	19.4808
Nup214	1.90213	2.03262	2.29281	2.01083	2.34469	2.33548	1.26594	1.41898	1.20226	1.31438	1.40531	1.27827	1.08385	1.17812	1.13845	1.10476	1.16464	1.12053	0.755512	0.78144	1.06178	0.945838	0.90351	0.759323
Aif1l	0.0255005	0.00713771	0.0125416	0.00811763	0.00687545	0.0244527	0.59618	0.649386	0.434499	0.59397	0.587348	0.277942	1.61393	1.48548	0.75565	1.38925	1.48517	1.06589	1.87287	1.30981	1.74638	2.06699	1.16961	1.18213
Cpa3	0.00894904	0.0532286	0.0623516	0.0106829	0.0241284	0.0357555	0	0	0	0	0	0	0	0	0	0	0	0	0	0	0	0	0	0
Ltbp1	0.00184287	0.00107464	0.00151059	0.00122217	0.00289843	0.00220893	0.273727	0.230924	0.156808	0.37969	0.221402	0.243098	0.211853	0.211196	0.141007	0.266012	0.193791	0.302743	0.121361	0.146766	0.161947	0.165073	0.139862	0.152323
Ugp2	0.942463	0.843893	0.871775	0.859618	0.740878	0.834687	1.1972	1.30265	1.206	0.86959	1.067	1.10871	1.08621	1.05476	1.01541	0.810101	0.828474	0.940783	1.98467	2.27799	2.14914	1.94357	2.05432	2.15947
Kcnh6	0.0179902	0	0.0110599	0.0107378	0.0121263	0.00359396	0.0093052	0.00340872	0.00567652	0.0117049	0.0143877	0.00285005	0.0154031	0.0285467	0.0145921	0.0359008	0.0259863	0.0325245	0.0100401	0.0210011	0	0.00914442	0.0111305	0.00393383
Trmt1	2.51762	2.00197	2.81411	2.47297	2.5099	2.54642	1.6437	1.99485	1.31103	1.63804	1.75533	1.66233	1.71843	2.29702	1.30427	2.34517	1.34784	2.17714	1.47383	1.51402	1.7739	1.92702	1.37248	1.19343
Nacc1	3.66304	3.90455	3.5114	4.38088	4.59331	4.69319	5.82865	5.03032	4.41663	7.89544	7.36108	5.27789	7.00379	6.13361	6.40338	7.58895	7.81159	8.98775	5.88545	6.04124	8.16482	8.58035	7.47281	6.51523
Nfix	0.398651	0.411405	0.339378	0.382216	0.446522	0.401744	0.906778	0.842764	0.683062	1.19681	1.17437	0.652167	2.30115	1.84038	1.50258	2.24144	2.35052	2.1087	4.75993	4.12712	5.1556	5.67377	4.21858	4.28871
Slc1a5	0.315823	0.30449	0.4027	0.223414	0.35007	0.415011	0.0762325	0.148938	0.0575772	0.0867596	0.0785803	0.0266845	0.105759	0.202933	0.0645166	0.140056	0.0729914	0.187788	0.305512	0.14201	0.297743	0.290148	0.283691	0.251683
Uba1	7.96686	8.54305	7.6201	9.65501	10.3243	8.15843	16.5993	15.3454	10.9455	19.3275	19.706	14.2364	19.7937	17.3616	13.5524	17.578	18.7165	16.8897	13.4507	12.5938	13.9583	13.1323	12.5801	9.92124
Vwf	0.0246352	0.0231831	0.0167117	0.0331264	0.00858897	0.0400504	0.12215	0.106876	0.0696911	0.170232	0.120024	0.127042	0.0715692	0.0766842	0.0436388	0.0906944	0.0849125	0.101977	0.0246526	0.0204944	0.0180193	0.00921164	0.0280308	0.00743014
Siae	0.435131	0.5063	0.559896	0.482189	0.538854	0.597374	0.134778	0.14572	0.0854125	0.228791	0.168603	0.1539	0.378623	0.289923	0.214774	0.383684	0.298188	0.321073	0.381204	0.40164	0.437925	0.38406	0.375649	0.325273
Vsig2	0.264106	0.151209	0.137764	0.229291	0.161837	0.402904	0.173862	0.127379	0.287883	0.124971	0.23042	0.502084	0.559149	0.626506	0.363526	0.982219	0.679751	0.694513	0.214392	0.0934268	0.200078	0.162721	0.178257	0.336004
Esam	0.0464204	0.0812079	0.0570758	0.00923567	0.0469344	0.166924	0.0360155	0.140729	0.0219708	0.0830565	0.0742493	0.102956	0.222572	0.114582	0.0627538	0.162112	0.181042	0.276947	0.142486	0.0812843	0.0263749	0.149438	0.105307	0.0507526
Spa17	0	0.0159442	0	0	0.0153584	0.0182075	0.0412488	0.0604416	0.0503266	0.0815358	0.164002	0.0866326	0.109248	0.184795	0.0985677	0.0909394	0.18431	0.173012	0.254323	0.257121	0.198506	0.432385	0.253749	0.129541
Fam50a	8.10022	7.58489	8.15931	7.39009	8.1843	5.84556	5.00176	5.06325	3.00383	5.28109	5.7257	4.25459	6.46348	6.13664	2.81774	6.2992	4.13016	3.74413	4.77229	4.1723	2.82151	4.74273	4.06439	2.5272
Emd	2.82352	3.83037	2.86818	3.2396	4.33181	3.59893	2.68791	2.61259	1.68345	3.21204	3.67578	2.53567	4.60361	4.89876	2.07008	5.68641	5.08435	3.87076	6.86379	5.4328	6.52201	6.1869	5.11569	4.96955
Taco1	0.566616	0.616771	0.722481	0.68892	0.732028	0.691745	0.773392	0.703807	0.437034	0.593946	0.855952	0.428876	0.689969	0.899103	0.672365	0.800932	0.863929	0.751217	1.22975	1.07792	0.834654	1.14138	0.908872	0.894827
Grik3	0.00904096	0.00669866	0.0183091	0.00931126	0.014339	0.0178489	0.981478	0.854106	0.552423	1.25708	1.03921	0.866452	1.15002	1.01605	0.533171	1.1186	1.21345	1.17724	0.0955705	0.0782246	0.13658	0.101642	0.0960789	0.153969
Gria3	0.0183997	0.0164685	0.0238508	0.0112376	0.0285541	0.0218836	0.66132	0.628831	0.315669	1.31128	0.662295	0.670567	1.23451	1.21494	0.563419	1.49946	1.03319	1.22229	0.0472834	0.0496185	0.0440862	0.0553903	0.0607139	0.0557657
Npas1	0	0.00755805	0.00442672	0.0128935	0.00364017	0.00863092	0.567043	0.593489	0.15677	1.20871	0.858043	0.403821	1.77556	2.02619	0.359192	2.70503	1.72241	1.19115	0.102473	0.0840573	0.0490945	0.0768614	0.14256	0.0566827
Sipa1l2	1.43405	1.45619	1.5106	1.35568	1.64658	1.6873	0.659104	0.668983	0.354382	1.04871	0.74538	0.629818	0.572406	0.603719	0.405726	0.531403	0.617699	0.645678	0.221172	0.152381	0.2225	0.23037	0.303017	0.197977
Ap4e1	0.491919	0.390591	0.548055	0.409061	0.39248	0.539093	0.332329	0.40935	0.411801	0.296542	0.307236	0.340988	0.209043	0.290282	0.242116	0.202343	0.218099	0.246838	0.147912	0.148446	0.120165	0.144242	0.0977233	0.0983457
Blvra	1.73195	1.53619	1.47129	1.5645	1.09768	1.12876	0.651512	0.562566	0.323635	0.702454	0.582832	0.470365	1.12468	0.809008	0.420835	1.20295	0.831749	0.653891	0.577437	0.434122	0.255598	0.542692	0.426767	0.326582
Pdzd4	0.191751	0.149965	0.147931	0.122679	0.152058	0.177262	0.301431	0.304905	0.128126	0.457447	0.376866	0.288289	1.0224	0.79017	0.313097	0.862846	0.699504	0.641672	0.285369	0.23701	0.242107	0.33126	0.207807	0.213756
Srpk3	7.88812	6.43977	7.75902	7.00999	6.85891	7.1858	18.7409	22.8775	18.6009	16.9877	17.5657	18.2116	2.75554	3.87558	6.08538	3.43687	3.6917	5.66635	0.616317	0.388796	0.836611	0.677166	0.303668	0.666945
Idh3g	21.8701	21.7923	21.4017	22.7694	22.3749	20.2533	8.19736	7.19785	4.22554	10.2334	8.38592	6.25548	17.9146	17.7373	8.8777	20.103	17.0936	13.7466	31.3496	25.9151	27.2126	29.228	27.89	18.9193
Pnck	0.317081	0.504275	0.165397	0.619386	0.544036	0.391583	2.80301	2.62164	1.16422	5.32633	3.99589	1.97278	8.21361	8.9041	2.60307	9.00245	9.04368	6.7331	2.02698	1.32356	0.873493	2.14897	1.68832	0.630314
Ssr4	13.2852	12.8182	9.81363	13.8565	14.3067	12.8642	10.3316	8.62373	5.99692	9.94535	10.3832	8.14136	14.4312	15.057	6.98104	13.5053	10.8367	11.4158	13.8865	13.9639	11.3906	12.1605	12.2229	8.44844
Bcap31	4.70684	4.61889	4.48172	4.26295	4.90852	4.22027	3.65388	3.15295	2.29026	2.76853	2.91511	2.41024	3.66633	2.95063	2.40165	2.67238	2.17015	2.42105	3.52013	2.4513	2.35616	2.9886	2.66372	1.84012
Fam98a	0.911752	0.984996	0.826028	0.852898	0.938022	0.613536	3.63209	4.07945	3.31599	3.56447	3.78232	3.41593	2.49804	2.50434	2.53864	2.32222	2.24121	1.92598	1.54437	1.57474	1.16331	1.56107	1.23376	1.01433
Ltbp2	0	0.00178236	0.00104392	0	0	0.00203537	0.00592855	0.00386092	0.00964436	0.00248582	0.00135803	0.00968443	0.000872327	0.00628713	0.01033	0	0.00588673	0.00736785	0.0014215	0	0.0173664	0.00345251	0.00840474	0.00891139
Kmt2a	3.90055	4.5498	5.07337	3.67331	4.74133	4.50476	2.5065	2.46161	2.30947	2.91282	2.48045	1.98087	3.05189	3.0971	2.54373	3.23465	3.06864	3.19344	1.50286	1.80616	2.11859	1.92529	1.93715	1.58713
Ift46	0.888833	0.885739	1.03755	0.936974	0.981801	1.11559	2.16149	1.79523	1.56527	1.65012	1.72191	1.34471	1.83919	1.90022	1.55513	1.26298	1.25566	1.37977	2.25429	1.27843	1.64636	1.69364	1.32442	1.11933
Tmem25	0.150223	0.090103	0.123137	0.0170788	0.159119	0.102893	1.27651	1.07349	1.27304	1.20079	1.32727	1.01994	1.82273	1.93725	1.85673	2.07706	2.15752	1.8468	2.29954	2.22129	1.80461	2.42892	2.42536	1.42656
Cd3g	0.0547231	0.0842449	0.00897126	0.0435503	0.0516406	0.0437288	0	0	0	0	0	0	0	0	0	0	0	0	0	0	0	0	0	0
Trappc6a	0.966117	0.66532	0.527947	0.854294	0.837271	0.588203	0.523507	0.627621	0.62904	0.538785	0.703154	0.437299	0.682756	1.10313	0.605346	0.489641	0.637954	0.609939	1.21529	0.656398	0.941014	0.987352	0.974088	0.791372
Supt6	5.96041	4.87236	5.62801	5.16286	5.68141	5.57367	7.65097	7.61627	6.65129	7.63581	7.58301	6.66741	6.39984	5.77985	5.47329	5.90492	5.51225	5.42077	3.59349	4.06825	4.0267	4.81546	3.70519	3.93649
Spag5	0.15333	0.127164	0.158268	0.695991	0.130147	0.19967	0.199739	0.15925	0.0716752	0.273418	0.163501	0.0683744	1.12026	1.14142	0.340861	1.42225	0.656237	0.595478	1.96498	1.71037	1.72946	2.12837	1.9582	1.32125
Foxn1	0	0.00286964	0.0168074	0	0.0027642	0.00327698	0	0	0	0	0	0	0	0	0	0	0	0	0	0	0	0	0	0
Unc119	0.334664	0.51228	0.411484	0.699132	0.592149	0.350999	1.56873	1.90233	0.488391	2.66734	2.43113	1.13989	5.53019	4.94166	1.49298	4.6332	3.98815	3.90251	3.64205	3.53236	3.35929	4.06847	3.26114	1.92096
Rab34	2.46349	2.78469	2.40764	2.13646	2.76753	2.32189	8.26603	6.53483	4.82334	10.48	8.5206	7.32511	13.0881	11.5156	8.19765	12.5108	9.92712	11.9452	17.9787	18.4837	18.5909	21.1054	16.414	13.0112
Sdf2	6.046	5.45904	5.37552	5.13171	5.20916	4.39298	7.14342	6.64248	4.21544	6.01157	6.83699	4.22523	10.4784	9.69691	4.62716	7.86918	7.61342	6.57597	12.3811	11.2509	8.32018	9.83914	9.17063	6.40767
Ccne1	0.0622239	0.0957922	0.0918084	0.148559	0.041942	0.00994453	0.257476	0.132048	0.125656	0.31578	0.345027	0.181381	0.59669	0.930318	0.168236	0.807123	0.510521	0.476978	0.694528	0.464884	0.518528	0.581963	0.379846	0.250354
Hsf2bp	0.124584	0.079914	0.13297	0.0733278	0.0472363	0.10785	0	0.00098357	0.0024569	0	0.000691916	0.00164474	0.000888901	0	0	0.00129488	0.00149964	0	0	0.00201993	0.000983133	0.00175906	0.00214111	0
Bbc3	0.0121125	0.0678068	0.0694998	0.0385579	0.0898086	0.058074	0.0626503	0.0734409	0.0152876	0.102449	0.0452058	0.0460533	0.0414827	0.0512534	0.078597	0.0483428	0.0909797	0.0175185	0.040559	0.0188529	0	0	0.0399679	0
Mybpc3	0.0840965	0.0407405	0.0636309	0.0669265	0.0566852	0.108555	0.00334599	0	0	0.0126266	0.00689807	0	0.0177238	0.00912436	0	0	0.0224261	0	0	0	0.00490068	0	0	0
Psmc3	6.79817	5.22136	5.21774	6.4815	6.68874	5.06354	8.12173	7.33866	4.39933	7.53862	8.0745	5.63626	9.37218	8.61898	5.18913	7.82891	7.00021	6.25125	8.08164	6.33828	5.21564	7.96999	6.78198	3.8351
Acp2	23.3286	25.0689	23.6575	25.01	27.1484	23.6812	6.65545	5.95254	4.57511	8.04771	6.67958	6.00459	9.13299	9.39599	5.70847	9.57098	8.91046	9.0062	7.19291	7.8445	8.63176	6.97505	7.79049	6.63776
Rapsn	0.658371	0.551198	0.558937	1.16018	0.847927	0.338207	0.00608096	0.0623728	0.0370961	0.00764918	0.0438777	0.00745005	0.0161056	0.0331651	0	0.0234613	0.0135857	0.0425096	0.0131225	0	0	0.0398393	0.0290952	0
Slc39a13	2.74179	4.06859	3.62526	2.76313	4.14198	3.08274	3.28528	3.04915	2.04327	4.42834	4.23858	2.95104	6.20026	6.14097	3.57614	5.41647	6.26504	5.41023	5.49012	4.72863	6.9828	5.04237	6.72855	4.71192
Celf2	0.417004	0.408936	0.434627	0.402761	0.377886	0.349381	0.0672486	0.0648258	0.0494145	0.116562	0.0964333	0.0780406	0.17215	0.20568	0.0908462	0.250774	0.216796	0.196373	0.124193	0.103472	0.129037	0.163026	0.111095	0.126366
Nr1h3	0.0253231	0.0354403	0.0259465	0.0201529	0.0768107	0.0202355	0	0.0143944	0	0.0370708	0.0303782	0.0080235	0.11708	0.049112	0.0445033	0.0505343	0.0731569	0.0457817	0.247319	0.335028	0.235004	0.266016	0.261123	0.160581
Ddb2	0.495783	0.474574	0.578916	0.439226	0.501274	0.426077	0.164507	0.219782	0.138727	0.258665	0.194511	0.2134	0.27872	0.329856	0.161867	0.336014	0.262135	0.273972	0.287132	0.28392	0.265748	0.329669	0.343395	0.241367
Spi1	3.49783	4.12759	2.78832	5.11946	4.85467	2.9004	0.0184237	0.0269961	0.0314696	0.0579374	0.0626706	0.0970581	0.0414762	0.0577767	0.0154088	0.0710813	0.0699735	0.0824274	0.0119272	0.105338	0.0215873	0.0410388	0.041137	0.0342704
Sf3a1	3.59366	3.76268	3.70078	4.64154	3.63887	3.71048	3.43222	3.04432	1.98732	3.50197	3.46368	2.78973	4.06459	3.72794	1.91429	3.74603	3.93303	3.09454	4.65676	3.18853	4.26421	4.95457	4.10438	2.95117
Stat6	8.12114	9.23233	9.14505	7.65776	9.26309	9.10544	0.0478891	0.0751839	0.13355	0.103267	0.0810978	0.209539	0.0679475	0.0839517	0.0178805	0.0659869	0.122275	0.0956497	0.0442896	0.0617612	0.0701404	0.0851592	0.0490997	0.109904
Clgn	1.31797	0.986758	0.808361	0.948637	0.851103	0.633381	3.79942	3.88848	5.01945	1.68903	2.07533	2.1084	2.51466	2.8318	3.89069	1.65838	1.44313	1.4752	0.106302	0.141064	0.0930958	0.0728745	0.0684274	0.021497
Napsa	0.0902724	0.120596	0.100903	0.111028	0.121696	0.0918094	0.00424475	0.0186594	0	0.00533943	0.00875095	0	0.0112423	0.0405134	0.0177506	0.0409422	0.0474166	0	0	0.00638672	0.0124341	0	0	0.0143559
Vrk3	0.890276	0.951617	0.883739	0.858009	1.06254	0.979008	0.853374	0.860454	0.626254	0.964511	1.17578	0.84365	1.25876	1.20676	0.865656	1.11242	1.03114	1.0425	1.37204	1.23633	1.16945	1.16522	1.19595	1.10731
Smg9	1.17519	1.11322	1.21569	1.34365	1.30754	1.23844	0.629085	0.688429	0.557026	0.797997	0.711389	0.458529	1.15997	1.11832	0.685424	0.993371	1.0793	0.838715	1.17997	1.26604	1.27517	1.19991	0.918648	0.592495
Paxip1	1.08921	1.08446	1.20804	1.17836	1.10515	1.13719	1.0934	1.13268	0.986721	1.26302	1.32597	1.06378	1.30915	1.41451	1.06091	1.25912	1.38772	1.28392	0.858474	1.07885	0.983897	1.22512	0.95171	0.690847
Rmnd5a	2.16885	1.72238	2.05504	1.99339	1.64677	1.66736	1.49062	1.60048	1.71339	1.42598	1.33304	1.50616	1.03316	1.0009	1.12089	1.03072	1.01941	1.02633	0.528038	0.535358	0.625017	0.64434	0.641002	0.601684
Mov10	0.996784	1.12163	1.07983	1.10021	1.17157	1.10873	0.137314	0.125279	0.0790249	0.175984	0.149554	0.171403	0.312214	0.314395	0.241062	0.204914	0.263365	0.362229	0.240408	0.113048	0.318749	0.26479	0.144622	0.249725
Ppm1j	0.0718547	0.0670415	0.0785319	0.171552	0.0645782	0.0956976	0	0.018153	0	0	0	0	0	0.0168917	0	0.143392	0.12455	0.0346417	0	0.0372803	0	0	0.0987921	0
Rhoc	0.781379	0.738151	0.384295	0.652937	0.671527	0.499515	1.40445	1.46572	0.936896	1.43619	1.62476	0.755106	3.49225	3.78855	1.45771	3.54741	2.87813	1.69519	4.20815	3.40538	2.01262	3.2436	2.56222	1.81112
Prr27	0	0	0	0	0	0	0	0	0	0	0	0	0	0	0	0	0	0	0	0	0	0	0	0
Tead3	0.111734	0.047781	0.106852	0.108681	0.129708	0.15873	0.0288965	0.0329326	0.011752	0.0726972	0.0463344	0.0157344	0.0340147	0.118199	0.0234964	0.0805184	0.0573853	0.0718237	0.457287	0.439612	0.479661	0.614221	0.619607	0.347482
Ppard	0.660131	0.646949	0.726668	0.649125	0.789747	0.929348	0.418314	0.491148	0.34134	0.507079	0.554659	0.474167	0.598936	0.637392	0.399012	0.537972	0.67796	0.648588	0.632663	0.442464	0.53675	0.609017	0.749843	0.643896
Def6	0.530621	0.566944	0.692174	0.66294	0.480733	0.806997	0.0177069	0.0129729	0.0108019	0.0259856	0.0152102	0.0180779	0.0234486	0.0201192	0.0092558	0.028465	0.00659325	0.0288825	0.0191054	0.00444035	0.0389015	0.0232013	0.0188269	0.00499047
Peg3	0.622474	0.614203	0.880988	0.491819	0.996121	0.880315	5.62631	6.03466	4.04975	9.6413	7.35394	6.12399	16.0057	14.8216	8.03962	17.8823	15.9905	15.0589	3.18404	3.52698	3.67076	3.85451	3.70532	3.73283
Zim1	0.00943947	0.00330269	0.00386874	0	0.00318134	0.0113145	0.0366184	0.0608109	0.0297848	0.0859822	0.0503281	0.0568261	0.145477	0.203042	0.0561477	0.235465	0.169074	0.11946	0.0579486	0.0550966	0.0643594	0.0415834	0.10123	0.0577943
Metrn	0.030357	0.063728	0.0248835	0.024159	0.0613864	0.0485161	0.97351	0.897302	0.363989	0.592533	0.615043	0.327028	1.03966	1.43441	0.623784	0.999567	0.578817	0.526872	2.77847	2.40977	1.49484	2.18084	2.02844	1.03553
Lmf1	0.407319	0.623681	0.566544	0.480023	0.632333	0.709944	1.34043	1.32196	1.07028	1.35092	1.43468	1.18085	0.944892	0.969873	1.27548	0.642906	0.891354	0.910356	0.609882	0.579866	0.707458	0.56365	0.570164	0.551157
Ciao3	1.69143	1.43598	1.25393	1.52425	1.5928	1.41124	0.913467	0.820066	0.557249	1.08431	1.00791	0.709306	1.15856	1.35952	0.807026	0.781797	1.18568	1.01631	1.80464	1.42281	1.40386	1.65208	1.48765	1.07693
Angptl4	0	0.0205854	0	0.0702345	0.0991451	0.0235075	0.0380399	0.0334438	0.0092823	0.00957	0	0.00932086	0.0705246	0.03112	0.0238612	0.117411	0.101983	0.0531844	2.47907	2.67862	2.50717	2.85105	4.17403	3.67947
Dbf4	0.498604	0.500741	0.45033	0.650317	0.37965	0.453768	0.143276	0.150458	0.128192	0.228285	0.142765	0.128724	0.42374	0.416754	0.11983	0.714007	0.205395	0.287121	0.283417	0.183239	0.269305	0.431787	0.140913	0.153446
Daxx	6.85068	5.65565	6.15177	5.88078	5.07169	6.3047	5.67346	4.76921	3.78891	4.97057	4.86323	4.37779	6.01052	4.80424	3.44432	4.41622	4.76989	4.27225	5.39125	4.13341	2.98854	3.74304	3.77815	2.33958
Cd320	0.711343	1.13243	1.12244	0.919926	1.37851	0.682115	2.82389	3.04609	1.52628	3.32073	3.61249	1.73547	4.94548	5.43057	2.28869	5.00389	5.52802	3.72951	12.2869	9.53574	8.04295	10.0277	9.16891	6.67292
Ipo4	1.85752	1.86702	2.29775	2.17709	2.25371	2.23999	2.65525	2.51702	1.36404	3.37663	3.25922	2.83929	3.98661	3.15195	1.47927	3.58327	3.44091	2.36093	2.46285	2.38306	2.26858	2.92982	2.49816	1.68378
Tm9sf1	6.21446	5.33503	9.02004	5.46434	5.44551	6.26191	3.7553	4.45724	3.3574	4.52652	3.9356	4.04369	5.23255	3.80546	3.54894	4.76397	3.96721	3.89119	4.58481	3.68035	4.54712	5.93754	4.67637	3.75185
Rec8	0	0	0.0264797	0.102835	0.0435495	0.0387212	0.033418	0.0244836	0	0.0315272	0.0688944	0.0102355	0.18808	0.261997	0.0174684	0.322329	0.233313	0.093445	0.324516	0.163414	0.159073	0.339353	0.11992	0.084766
Irf9	9.29217	10.9702	12.4734	9.70866	11.6958	13.292	1.21822	1.42246	1.52115	1.67605	1.91304	2.14546	1.44939	1.38851	1.84072	1.26682	1.21199	2.2887	2.56725	3.17903	4.09822	3.49175	3.08134	2.49458
Gmpr2	1.09696	1.11131	1.08705	0.85996	1.35741	0.771903	0.626665	0.645256	0.454614	0.372833	0.593589	0.498003	0.459792	0.727433	0.478078	0.555433	0.785163	0.236798	0.657883	0.764506	0.520937	0.488232	0.499728	0.372329
Mdp1	16.862	11.831	12.4877	13.6351	10.5126	8.92265	14.1698	10.9982	8.10205	12.9709	11.5451	9.73993	12.9741	12.6569	7.82243	10.0588	8.95906	8.23826	8.37608	7.31778	3.83566	8.54798	6.07863	4.07265
Dhrs1	8.3033	5.53602	4.93667	8.56489	6.1253	4.61325	9.35451	12.2351	7.74748	9.41355	8.95859	9.5411	12.3512	10.7692	6.68676	10.4895	10.8614	9.43215	41.9643	30.4379	29.7643	38.2448	35.3066	22.5202
Ncan	0.72708	0.601561	0.476787	0.79647	0.902339	0.724547	16.3017	12.5738	3.74627	22.167	15.1208	7.25264	55.8719	48.0795	20.692	49.5029	48.074	42.5678	143.902	129.209	142.311	172.155	144.68	119.031
Tmem161a	1.13338	0.969341	1.12688	1.09407	1.28033	0.897291	2.38291	2.77583	1.74837	1.91863	2.59617	2.03494	2.34333	2.29431	1.87833	1.69632	2.13434	1.74548	2.29584	2.22145	2.44069	2.45375	2.63175	1.45945
Armc6	0.191234	0.197818	0.333953	0.357315	0.487583	0.292339	0.834312	0.724686	0.393527	1.08193	1.07279	0.890431	1.13332	0.98511	0.48557	1.05361	1.25385	0.883872	0.825961	0.498246	0.522802	0.8847	0.69275	0.385436
Borcs8	2.37088	2.93524	2.42924	3.43497	3.70838	2.24674	4.1034	4.84932	3.42396	2.96645	3.92997	2.44621	4.23684	4.86607	4.28167	3.29066	4.06568	2.71466	4.49534	5.14504	4.73203	4.21276	4.32535	2.858
Slc25a42	0.259242	0.344972	0.337909	0.453211	0.380995	0.285267	0.96061	1.14346	0.941368	0.776989	1.176	0.697513	1.06542	1.29778	1.21109	0.983791	1.46104	1.23548	1.43257	1.7364	2.50805	1.87218	2.5137	2.06304
Snx9	0.965207	0.949802	0.993269	1.00401	0.972361	0.978783	0.315417	0.307126	0.264003	0.354951	0.306253	0.280059	0.4671	0.414342	0.346062	0.392557	0.36295	0.372709	0.1859	0.228616	0.201679	0.239086	0.193648	0.176646
Ranbp3	0.889736	0.804195	1.00534	0.9859	0.984967	1.11338	1.395	1.32526	0.970899	1.67033	1.38854	1.31361	1.55955	1.65367	0.987296	1.40563	1.26021	1.32036	1.0862	0.973732	0.87297	1.04269	0.950595	0.586365
Ndufa11	1.63028	2.37669	1.78178	2.85434	2.78386	1.80213	5.50919	4.83944	2.81211	5.58639	6.17141	3.99463	9.69646	13.2604	4.6723	10.4108	10.2202	6.30742	18.1665	16.515	10.3127	14.2716	13.7177	6.41675
Bmp8b	0.00441255	0.00617547	0.00361695	0	0.00297428	0	0.0410821	0.0535088	0.0751848	0.149288	0.0893998	0.120236	0.0241793	0.0280073	0.0310188	0.0572364	0.0178466	0.0319099	0.0147755	0	0.0200569	0.00897161	0.00364006	0.00385949
Nr2f6	0.318464	0.339579	0.298335	0.337924	0.398655	0.193891	0.188253	0.195391	0.200972	0.217068	0.307247	0.240247	0.35317	0.491968	0.303413	0.469074	0.394295	0.318034	0.67707	0.507487	0.551447	0.431668	0.487892	0.291812
Use1	46.0308	34.431	32.5293	41.9456	32.027	27.0685	11.7019	9.40106	6.89156	11.3414	9.55758	7.59915	16.2585	18.106	6.86337	13.8568	13.7147	10.9072	24.1483	16.9334	15.4846	19.3827	15.7736	10.8853
Ocel1	1.32659	1.09333	0.652439	1.16131	1.27173	1.06007	0.510809	0.625601	0.706942	0.450738	0.840893	0.467026	0.565387	0.613316	0.749227	0.720658	0.698355	0.564943	0.510021	0.607975	0.725821	0.519465	0.82684	0.373879
Dyrk1b	0.85054	1.0947	1.36947	1.32959	1.73016	1.5171	2.24679	1.9454	1.48564	2.50999	2.38886	1.57844	2.5592	2.56002	2.52137	2.4399	2.97491	2.48227	2.25471	2.34038	2.00206	2.69691	1.65386	2.00596
Braf	0.901378	0.81038	1.09832	0.786214	0.730792	0.968926	0.612079	0.638205	0.804463	0.712358	0.654777	0.785623	0.69866	0.790669	0.707724	0.774228	0.814635	0.850839	0.249625	0.257289	0.26887	0.322252	0.30481	0.361456
Ndufb2	0.417858	0.423212	0.360544	0.385051	0.266833	0.202102	0.671146	0.566721	0.478818	0.75122	0.967369	0.452935	1.30303	1.38815	0.564886	0.998449	1.32788	0.69183	1.46058	1.17242	0.858034	1.29674	1.28811	0.634788
Hltf	2.46396	2.13535	2.89147	2.07624	1.66743	1.93763	0.499447	0.55964	0.545089	0.454939	0.442773	0.502671	0.344785	0.417155	0.375986	0.25015	0.323658	0.389511	0.0961917	0.0609717	0.0756736	0.102212	0.12118	0.0839437
Prpf6	1.19422	1.02731	1.19116	0.971149	1.11514	1.06892	1.10722	1.07737	0.676034	1.097	1.02808	0.907878	1.26718	1.04718	0.711247	1.01126	0.923591	0.808371	0.879624	0.807598	0.732511	0.9331	0.802257	0.686035
Rgs19	23.7567	25.7815	18.9825	25.6111	24.4306	20.2824	1.53736	1.42617	0.809654	2.61555	2.32576	1.70734	3.50053	4.01136	1.4916	4.37386	3.81767	3.95865	2.69701	2.52948	1.60372	2.59409	1.99328	1.55235
Rgs20	0.00591617	0.00569237	0.00363709	0.00647386	0.00648016	0.00768229	0.0286881	0.0313873	0.0228677	0.0341619	0.0453431	0.0243686	0.0850988	0.108481	0.0435882	0.115848	0.113231	0.0984019	0.614124	0.694662	0.710382	0.706189	0.708274	0.620957
Abhd3	0.0863625	0.0938643	0.0963962	0.0731169	0.0805069	0.0778216	1.0122	1.09184	0.81635	0.930121	1.17759	1.09687	0.779079	0.679043	0.706461	0.781045	0.748488	0.684336	4.04042	4.70621	3.13207	4.17063	4.17303	3.71904
Snrpd1	0.508565	0.253218	0.264551	0.525372	0.355983	0.339961	1.07749	1.10815	0.546214	1.36172	1.21235	0.982311	1.5776	1.43465	0.42837	1.32227	1.08496	1.03967	1.26083	1.22922	0.714977	1.4052	1.17388	0.607353
Tchp	1.90098	1.36448	2.14673	1.49987	1.48483	2.26228	0.755377	0.605985	0.453085	0.546752	0.722091	0.485988	0.804723	0.845817	0.480882	0.757081	0.735382	0.495604	0.801375	0.939719	0.933296	1.00636	0.821105	0.677928
Tiam1	0.103633	0.111459	0.128378	0.120132	0.105343	0.131275	0.0365397	0.0343473	0.0279683	0.0455293	0.0422843	0.0308296	0.0823966	0.0888319	0.0391012	0.0871122	0.109552	0.0845826	0.0174811	0.0134852	0.0234771	0.0343275	0.0362853	0.0244826
Tsc2	2.4729	2.6047	2.40279	2.52552	2.59821	2.51524	3.14092	3.01931	2.37345	3.58335	3.35985	2.8211	4.35841	4.34632	3.48965	3.86543	4.41327	3.73069	3.05206	2.96718	3.38971	3.63418	2.98806	2.33802
Rpl3l	0	0.00999219	0.0117048	0.011364	0	0	0.0147717	0	0	0.00929059	0	0.0180975	0	0.0302114	0.00772151	0.0427436	0.0247514	0.0103263	0.111568	0.0444515	0.216353	0.16452	0.153134	0.174855
Slc9a3r2	0.516682	0.406749	0.370582	0.325526	0.362781	0.507494	8.32921	7.97877	10.9978	2.63331	7.05338	5.10224	9.30476	8.10759	18.4399	2.66362	5.75919	5.77592	1.8743	1.55816	1.73694	1.41528	1.68715	1.07331
Puf60	4.87915	4.2349	3.82711	4.4641	5.01895	4.10224	13.0018	11.4544	7.17055	11.8342	13.9331	9.75235	15.0428	13.1319	8.82448	10.0348	10.9185	9.4571	11.5218	8.58453	8.48219	10.3027	8.77096	5.71917
Golga2	2.49999	2.75772	2.61846	2.47314	2.74611	2.52952	3.27761	3.12722	2.53083	3.21547	2.97436	3.17943	3.26225	2.49772	2.80071	2.89865	2.71839	2.52352	2.14449	2.00415	1.86322	2.40814	2.11483	1.57924
Uck1	0.622239	0.612812	0.736734	0.531878	0.745636	0.331484	1.53771	1.48466	0.916242	1.21454	1.38847	1.03688	1.57855	1.86909	0.834949	1.31071	1.39814	0.983288	2.44371	1.8294	1.53638	2.32723	2.43345	1.26991
Scin	0.00159615	0	0	0.00127026	0	0	0.00165118	0	0.00100728	0.002077	0.00170203	0.00606878	0	0.00112567	0	0	0	0.00115427	0	0	0	0.00108176	0	0.00139609
Ikzf4	0.0154288	0.0129557	0.0101175	0.0147344	0.0207995	0.0271238	0.217065	0.236209	0.091524	0.373428	0.350432	0.21705	0.551651	0.387364	0.230267	0.578839	0.684637	0.482003	0.134325	0.201723	0.299222	0.202858	0.170551	0.21322
Mien1	10.5601	11.214	7.36526	11.574	10.7395	6.88405	30.9518	25.9765	15.842	23.6859	29.1887	17.7275	31.2171	31.9456	16.3295	21.9054	24.9948	14.8714	45.3901	27.6829	19.1579	27.7489	24.8351	14.0979
Pon1	0	0.00321647	0.00753549	0.0073161	0.00929486	0.0110191	0	0	0	0	0	0	0	0	0	0	0.00265581	0.00332402	0	0	0	0.00623044	0	0
Axl	1.39145	1.33352	2.13855	2.09434	1.75347	2.98519	0.287492	0.263646	0.13601	0.482178	0.352793	0.289922	1.16545	1.0693	0.474349	1.07523	1.20812	1.30155	10.5678	9.48996	11.9677	10.0376	10.8141	9.40563
Tgfb1	5.67444	6.78663	5.82627	7.14275	7.20208	4.98101	0.0272077	0.0498342	0.120334	0.0855608	0.115688	0.1125	0.10809	0.0602829	0.0284442	0.0721679	0.0683838	0.0950993	0.227513	0.163749	0.0846805	0.111407	0.173572	0.10352
Ccdc97	8.30832	9.49177	9.20243	8.57902	10.9596	9.7921	5.04441	6.3872	3.91824	5.51219	6.93831	4.36854	5.74184	6.61543	4.79862	4.81352	7.42434	6.18053	7.37895	6.17621	6.93707	7.52796	8.92959	4.16743
Zfp40	0.931995	0.828089	0.763951	0.73195	0.59928	0.695753	0.450348	0.557656	0.615238	0.474733	0.519792	0.505115	0.356987	0.518907	0.427711	0.581209	0.460555	0.514355	0.116346	0.0715775	0.0836112	0.228556	0.111278	0.0965343
Akap8l	2.04439	2.26272	2.59379	1.94785	2.19331	2.14133	1.1122	0.892018	0.619376	0.99098	1.1052	0.727757	1.25806	1.15171	0.656249	1.17841	0.955333	0.998379	0.740936	0.966666	0.839173	0.822501	0.923872	0.584177
Shh	0	0	0	0	0	0	0.0353256	0.0345083	0.00718331	0	0.0182068	0.0144263	0.155934	0.13647	0.0677069	0.0454305	0.078922	0.107011	0	0	0.00862324	0	0.00939003	0
Pdcd2l	1.59284	1.32659	1.68212	1.68758	1.5018	1.45243	1.24845	0.992443	0.561181	0.998201	0.77631	0.829788	1.31861	1.01997	0.681659	0.828788	0.903387	0.614809	1.47249	1.13315	0.577434	0.960313	1.1447	0.598306
Gtf2f1	9.18156	8.34499	9.88648	11.0144	9.73547	7.32487	15.0581	13.6204	9.75213	12.899	14.8386	11.1302	13.3834	11.5363	9.25308	8.93562	9.49497	7.2612	13.1931	10.7476	8.18918	12.3125	9.01686	5.61757
Clpp	1.39393	1.51261	1.88777	1.39872	1.72937	1.22688	4.13787	3.46031	2.20554	4.61351	4.9331	2.9572	6.51743	6.85291	3.08058	6.10764	5.56773	4.73338	10.4627	8.34838	6.33599	8.50242	7.54933	4.9122
Alkbh7	1.85793	2.34858	1.67032	2.33714	2.74707	1.29309	3.13097	2.49831	1.39941	2.0667	4.40971	1.44321	7.01985	7.52361	2.52787	5.92028	4.98653	4.68087	17.393	14.1327	9.21692	11.0483	11.322	7.33898
Pspn	0	0	0	0.168596	0.285595	0.338575	0.219153	0.160562	0.401075	0.275671	0.112951	0.134247	0.145108	0.298811	0	0	0.244808	0.306403	0.236461	0	0.160491	0.430733	0.699047	0
Dennd1c	11.8763	11.4501	12.2768	10.0441	10.5974	10.9063	0.0633787	0.100012	0.136809	0.0674583	0.0904577	0.131404	0.0387369	0.0265894	0.0458716	0.047024	0.0762441	0.136325	0.0105206	0.0806898	0.0285622	0.0574926	0	0
Med6	0.986196	0.930474	0.953707	0.723115	0.810392	0.858899	1.09184	1.00779	0.727248	0.904793	1.13728	0.891772	0.967713	1.08233	0.716032	1.15539	0.857918	0.86543	0.890509	0.914102	0.805873	0.8749	0.76784	0.794743
Prkd1	0.000772072	0.000810399	0.00189859	0.00215053	0.00208166	0.000616957	0.0351423	0.0336465	0.0131552	0.0612844	0.0440458	0.0281321	0.104974	0.0814024	0.0371569	0.0932142	0.0564308	0.0893331	0.152102	0.134593	0.157337	0.158548	0.122605	0.13371
Lcp2	8.69847	10.7056	8.20573	8.81728	9.74023	9.09831	0.0311596	0.0377175	0.0826457	0.100545	0.0684279	0.162659	0.0556159	0.0387911	0.0155797	0.0418151	0.0348073	0.102283	0.0584705	0.222186	0.0277795	0.0266271	0.0410531	0.0160366
Cse1l	1.87333	2.55169	2.43131	1.81434	2.12836	2.07127	1.89069	1.95335	1.46102	2.46643	2.20647	2.51421	2.33025	2.40757	1.28217	2.54222	2.02012	1.97883	1.29864	1.59316	1.49058	1.41535	1.0837	1.31134
Naa20	0.821299	0.65018	1.08122	1.06955	0.794047	1.10708	1.00838	0.84253	0.643943	1.37098	1.11463	1.18284	0.681884	0.684526	0.426168	0.736707	0.661474	0.629927	0.398168	0.529414	0.314237	0.50602	0.301118	0.471649
Prkra	1.5416	1.65715	1.4626	1.11722	1.25578	1.4835	0.542893	0.755724	0.376723	0.90911	0.748482	0.656808	1.46932	1.21674	0.560471	1.26328	1.15604	1.02944	1.4571	1.23037	0.889569	1.316	1.12019	0.780338
Fkbp7	0.884986	0.86699	0.967225	1.0048	0.787412	1.59352	0.176996	0.14309	0.186162	0.291737	0.195029	0.2318	0.234389	0.249652	0.121233	0.282569	0.115902	0.383992	0.553168	0.541805	0.375445	0.567796	0.243351	0.381871
Plekha3	0.987318	0.999663	1.36541	1.07106	1.00755	1.12393	0.593413	0.639603	0.508198	0.610078	0.76167	0.632644	0.623378	0.661289	0.551781	0.599887	0.493973	0.658147	0.591027	0.746911	0.701997	0.893431	0.741668	0.627172
Ykt6	16.5681	12.7772	13.742	15.6268	12.248	12.6816	8.03053	6.9753	5.18746	6.98598	6.42726	7.19666	6.89661	4.97892	4.09406	5.31754	4.64154	4.50102	7.29838	4.69082	4.38742	6.15082	5.35346	3.86152
Baz1b	4.12681	3.6182	4.49651	3.52204	3.64993	3.793	2.5178	2.64878	2.46542	2.44988	2.34237	2.14941	2.39245	2.17426	1.66711	1.93193	1.80815	1.78126	1.21691	1.48956	1.57694	1.62832	1.31077	1.1973
Pex6	2.33002	2.78241	2.17978	2.17678	2.99314	2.44205	1.65929	1.35004	1.02821	1.55991	2.24152	1.21972	2.42285	2.01236	1.29646	1.53306	2.22912	1.61172	3.06243	2.71998	2.51342	2.56323	3.31493	1.6097
Mrpl2	2.79642	2.85016	2.96492	2.95117	3.52399	2.72038	3.97763	3.66291	2.47446	4.39035	4.68355	2.94701	5.97529	5.10187	2.79418	4.18535	3.45978	4.24235	7.49788	6.24502	5.08895	7.4161	4.86445	4.41328
Mea1	5.47723	5.29652	3.6549	5.41035	5.32454	3.07917	6.94733	5.84092	2.93543	6.33934	6.76507	3.12204	11.1042	11.3166	4.28639	10.8753	9.70076	5.85181	10.6296	7.96832	6.08854	10.5954	9.24104	4.64628
Gnmt	0.135671	0.0474686	0.222418	0.215942	0.0685867	0.216827	0.157892	0.205651	0.278257	0.308949	0.289341	0.3224	0.232322	0.191362	0.091704	0.169214	0.21557	0.318864	0.340723	0.105585	0.15417	0.298833	0.167879	0.118666
Grin2d	0.00511228	0.0107321	0.016762	0.0203425	0.00861483	0.0122555	0.0951934	0.0891163	0.0354882	0.196245	0.149913	0.08099	0.477981	0.448872	0.152044	0.431033	0.466702	0.33273	0.0342372	0.0258609	0.0464748	0.058901	0.059042	0.0223575
Kdelr1	2.64588	2.95175	2.20437	3.14124	3.17221	2.64288	3.30919	2.99155	2.23771	3.64051	3.38798	2.59059	4.97644	4.38201	2.6973	4.40366	4.64892	3.83463	5.15611	4.6415	4.36211	4.85781	5.47457	3.51879
Tmem143	0.220604	0.211244	0.171311	0.272585	0.273918	0.236591	0.168154	0.109998	0.10258	0.0830971	0.210476	0.0662186	0.270398	0.286594	0.153822	0.133229	0.201256	0.218308	0.570224	0.528606	0.426603	0.350171	0.354389	0.350364
Pdxk-ps	0	0	0.00311571	0.00302499	0	0	0	0	0	0	0	0	0	0	0	0	0	0	0.00424265	0.00295815	0	0.00257611	0	0
Ggct	0.137529	0.232573	0.394561	0.136812	0.177677	0.228954	2.38895	2.73614	2.35779	1.5137	2.31587	1.7648	1.35807	1.13964	1.45017	0.754736	0.946926	0.629884	0.332597	0.285416	0.0694583	0.139812	0.217449	0.0701697
Jag2	0.232748	0.329524	0.20853	0.258457	0.33201	0.242216	0.128785	0.118968	0.122969	0.144389	0.0923487	0.15435	0.13347	0.171778	0.0936611	0.20523	0.203282	0.168314	0.11479	0.105311	0.069709	0.0733681	0.0401863	0.0236716
Btbd6	8.78209	6.71938	8.50388	8.02588	8.6842	7.40329	6.86355	5.66856	4.1718	7.78593	6.61184	6.48245	10.279	8.06516	5.60991	8.95526	8.61495	7.99092	7.91728	7.473	6.21437	8.50274	6.48832	5.19124
Nudt14	1.53244	1.21037	0.808404	1.58181	1.42157	0.545597	0.643526	0.712967	0.44045	0.878588	0.76042	0.432665	0.613166	0.75973	0.467659	0.575288	0.517229	0.493753	1.1008	0.85018	1.06898	1.12085	0.513174	0.623735
Epdr1	0.0336906	0.0265223	0.01726	0.0167575	0.039741	0.0302871	1.1719	1.08201	0.433194	1.781	1.40333	0.907348	3.13842	2.93436	1.15456	3.43304	3.36518	2.79878	4.66767	4.96204	4.81426	4.75502	4.63091	4.53436
Flii	11.0346	9.94309	10.1571	8.95439	11.169	9.34525	4.70634	4.99047	3.94982	3.70739	4.6391	3.45613	5.54475	5.28158	4.09366	3.93478	4.5152	3.32272	4.41173	4.83579	5.02937	4.69552	5.43182	3.5758
Top3a	0.541564	0.50603	0.530089	0.499444	0.530383	0.544767	0.115342	0.10865	0.0944875	0.11607	0.125688	0.104974	0.144015	0.11458	0.0999125	0.155753	0.139889	0.124402	0.0924498	0.0595014	0.127908	0.0863614	0.144538	0.0947368
Atg4d	0.914286	0.746413	1.08512	0.712457	0.802441	1.06546	0.733985	0.808433	0.607028	0.724986	0.868301	0.60955	0.93937	0.973906	0.695242	0.798232	0.731864	0.847132	0.797268	0.637419	1.1111	0.651916	0.707085	0.399845
Qtrt1	1.61995	1.69543	1.75509	1.90578	1.75657	2.02615	1.94538	1.82563	1.22676	2.33709	2.43338	2.14235	2.34462	2.24517	1.22637	2.2348	2.00219	2.08829	1.68236	1.57863	1.73945	1.63252	0.859909	0.751575
Plin4	0.0387042	0.0631953	0.0317256	0.0410693	0.0521771	0.0206188	0.0333654	0.0488902	0.0569916	0.033576	0.0825432	0.0408774	0.0530214	0.0727889	0.0767398	0.0643644	0.0223628	0.0746383	0.187203	0.311253	0.645064	0.349749	0.340569	0.406236
Hdgfl2	2.68035	1.89147	3.21896	2.51192	2.30706	2.45882	2.72586	2.7401	1.96326	3.16337	2.69802	2.60342	2.72478	2.60965	1.67307	2.76489	2.07254	1.88915	2.27069	2.46082	2.20226	2.48097	2.3233	1.59597
Chaf1a	0.0820926	0.0548341	0.0887016	0.184117	0.0628801	0.0685814	0.129314	0.161202	0.0965476	0.15538	0.133297	0.115866	0.28115	0.365792	0.117031	0.346261	0.187572	0.202385	0.379014	0.185856	0.237456	0.36164	0.0954248	0.189299
Adprh	6.27606	6.1657	6.08798	5.92163	6.84434	5.36555	6.62709	6.71956	3.57148	7.3376	6.39282	4.85411	10.2496	9.31615	4.23106	10.5691	8.42425	7.05564	10.6148	7.42243	7.21486	8.91563	7.49468	5.84899
Tmem39a	1.09386	1.44391	1.54582	0.975107	1.58236	1.31966	1.08565	1.30009	1.06459	1.17153	1.38608	1.08927	0.953591	0.88415	0.935262	1.05601	1.2702	1.0453	0.95535	1.47594	1.11656	0.953163	1.26858	0.860463
Timmdc1	0.205281	0.19495	0.108172	0.13614	0.16802	0.0898304	0.348873	0.296349	0.175812	0.311643	0.297075	0.275655	0.361564	0.303333	0.195579	0.302363	0.364298	0.27216	0.485536	0.4032	0.322136	0.301439	0.318525	0.183826
Pla1a	0.00641934	0.00449201	0.0210476	0.0051087	0.00865391	0.00769447	0.00996097	0.0145958	0.0121531	0.0062649	0.00513387	0.0122036	0	0	0	0	0.0185451	0.00464222	0.00358255	0	0	0.00652591	0	0
Mcm2	0.87742	0.815024	0.591922	1.86619	0.968262	0.936921	0.807263	0.629691	0.156803	1.02555	0.778305	0.42316	2.47844	2.72707	0.692794	2.99058	2.05925	1.65648	3.14607	2.12105	3.20588	3.33113	1.96646	1.64355
Tpra1	2.79656	3.1394	3.11171	2.46235	3.93849	2.62459	0.701698	0.703502	0.465611	0.820718	1.104	0.595744	1.3857	1.09942	0.675673	1.413	1.80834	1.0413	1.95256	1.93561	1.60471	1.93565	2.1499	1.25945
Nab1	0.528699	0.392966	0.44909	0.416394	0.358216	0.367754	0.558261	0.558494	0.741625	0.449143	0.45861	0.532925	0.446572	0.548666	0.496235	0.333465	0.307058	0.487328	0.250725	0.287807	0.153569	0.224645	0.259877	0.21085
Adgre5	0.77588	0.800593	0.635985	0.832012	0.505254	0.688305	0.0510145	0.109635	0.0248966	0.0770047	0.094654	0.0333334	0.193662	0.111291	0.106666	0.170579	0.189955	0.185444	1.66598	1.42768	1.55414	1.50176	1.36688	1.15022
Il17ra	4.6929	3.73203	4.40372	3.3924	4.36594	4.42585	1.5449	1.27822	1.49002	1.9465	1.14158	1.80289	0.756732	0.596423	1.09701	0.565805	0.519704	0.760052	0.594742	0.566855	0.825842	0.500272	0.487948	0.521638
Lamb1	0.0202969	0.0180765	0.0105874	0.0117476	0.0174124	0.0265404	0.0181335	0.0293678	0.0116443	0.0168073	0.0186919	0.012862	0.0543462	0.0377376	0.0109754	0.0736438	0.0735622	0.0413651	0.0514885	0.0358999	0.0209677	0.0737817	0.0258764	0.0193668
Kcnn1	0	0.0117636	0.0275597	0.0401359	0.0377714	0.0134335	0.260857	0.199611	0.130842	0.295317	0.268891	0.195303	0.387664	0.355673	0.203019	0.369023	0.349673	0.279611	0.575428	0.453544	0.373573	0.334205	0.392923	0.289176
Arrdc2	1.55323	1.105	2.10073	2.32799	1.90196	2.58577	3.11982	3.15882	4.14948	1.179	2.40157	1.78808	2.23418	2.28208	5.7533	0.619917	1.13675	1.75973	3.26508	2.94139	3.60847	4.56159	2.58397	3.23787
Ppp1r17	0	0	0.00641251	0	0	0	0.287292	0.332031	0.469003	0.371562	0.629819	0.961732	0.117886	0.143446	0.368033	0.117086	0.307364	0.40167	0	0.0365294	0.011853	0.0371136	0.00645348	0.013685
Cd36	0.762278	0.729852	0.701235	0.654327	0.505586	0.546178	0.000573914	0	0.00280087	0.00144384	0	0.00421876	0.00380006	0.00313008	0.00239998	0.00221425	0.00320549	0.0104312	0.00123848	0.00086352	0.000840579	0.00375998	0	0.0029115
Map2k7	3.30962	2.63382	3.64909	3.8114	3.17568	3.1114	3.16861	2.7543	3.13699	3.05688	2.7472	1.98213	2.75589	2.62699	2.3441	3.0433	2.85713	2.85329	3.56373	2.7272	2.67441	3.57127	3.0407	1.74823
Timm44	2.644	2.45147	2.65491	2.66528	2.79209	2.5471	2.32108	2.28779	1.7288	2.68074	2.17327	1.70805	2.3493	2.71411	1.7117	2.858	1.98597	1.85892	1.94285	2.22343	1.60241	2.78246	2.25988	1.47749
Ap2a2	2.4495	2.59927	2.58819	2.88402	2.54787	2.46817	1.52471	1.39237	0.959243	1.65593	1.59581	1.25241	2.11909	1.89314	1.105	2.09589	2.06089	1.74105	1.12359	1.09417	1.13373	1.35651	1.27053	0.881939
Pnkp	2.2539	2.10293	1.5812	2.27851	2.36783	1.94711	1.82747	1.58513	0.909802	1.73068	2.2735	1.45401	2.90685	3.3939	1.57014	2.85674	2.13526	2.08514	4.05693	3.00249	1.93823	2.35325	2.36184	1.54515
Med25	1.58742	1.7627	1.67995	1.60138	2.16512	1.57817	2.22807	2.42317	1.72605	2.73964	2.89272	1.78045	3.17005	3.9367	2.06738	3.3909	3.34581	2.74863	6.37196	5.84059	5.95079	5.90958	5.94506	4.0741
Bcam	0.0239532	0.0167615	0.0196343	0.0444795	0.00538188	0.0446619	0.107375	0.0907712	0.0100774	0.103897	0.0936543	0.0303578	0.311731	0.230868	0.0863502	0.430204	0.507461	0.236734	0.490159	0.341759	0.56858	0.357145	0.52034	0.258394
Clptm1	4.05251	5.31369	4.99002	5.44679	6.66261	6.07649	8.25034	7.3838	5.91275	8.82744	8.63509	7.44978	9.03777	8.49135	7.41916	8.71438	8.7811	8.80984	9.76418	8.94464	10.1089	10.7237	10.5683	8.4871
Relb	0.342914	0.232795	0.276889	0.370656	0.344986	0.290379	0.0794184	0.0775809	0.0742872	0.0832496	0.084593	0.0616226	0.0806308	0.140771	0.0996331	0.102136	0.097587	0.114738	0.142818	0.115511	0.108565	0.156092	0.126663	0.0895322
Tomm40	0.445942	0.435696	0.565547	0.669611	0.601174	0.497543	1.08366	1.17337	0.600008	1.17699	1.11703	0.639824	1.33707	1.81577	0.545978	1.93094	1.68208	1.05873	2.13187	1.65013	1.49793	2.338	1.91571	0.96408
Apoe	729.105	531.403	575.464	869.459	919.188	630.585	25.5952	26.4755	12.0089	42.8694	38.608	28.2025	162.362	165.292	40.6803	161.374	195.256	123.127	4349.17	3225.13	2838.73	3556.6	3517.29	2199.59
Apoc2	0	0	0	0	0	0.0149277	0	0	0	0	0	0	0	0	0	0	0	0	0	0	0	0	0	0
Hbp1	2.41308	1.63035	2.73628	1.9165	1.63313	2.35069	1.18231	1.06468	1.32822	1.22608	1.02038	1.51984	0.730877	0.669675	0.788736	0.693508	0.687224	0.799959	0.928764	0.681856	0.882517	0.859178	0.7268	0.933298
Prkar2b	0.01965	0.015368	0.0189494	0.0285164	0.0225945	0.0221677	0.423288	0.350419	0.23415	0.746784	0.480696	0.587441	0.437034	0.427967	0.161884	0.501697	0.325912	0.436334	0.0812804	0.0926544	0.0516639	0.0587535	0.0572114	0.0404401
Cdkn1b	3.04559	3.46521	3.94478	3.27486	3.74533	2.861	3.36704	3.50645	3.24241	3.87233	3.73104	3.21169	4.57031	5.06637	3.40691	4.82505	4.27164	3.93415	6.07223	5.13847	6.21723	7.01163	6.15635	4.83968
Klf4	4.30915	5.07771	4.13614	9.82606	4.59014	5.88769	0.0577423	0.0846095	0.04227	0.26148	0.130945	0.226376	0.122345	0.28343	0.0482932	0.245056	0.180605	0.2099	0.548264	0.764544	1.11635	0.786859	1.03143	1.23031
Ap1m1	2.25145	2.42307	2.22133	2.5161	2.71229	1.86474	3.19627	3.25717	1.68425	3.65991	3.08309	2.25933	5.71859	4.43527	2.17958	4.86166	4.09236	3.24147	3.65876	3.4937	2.89801	3.6918	2.81699	1.99319
Rab8a	2.48646	2.0696	2.25697	2.65784	2.80157	1.98691	1.84114	1.68613	1.36762	2.04689	2.01785	1.31359	1.86805	2.00459	1.20301	1.91165	2.0234	1.83218	1.92228	1.52362	1.66159	2.23505	1.93457	1.29573
Hmgn2	1.7013	1.59442	1.74318	1.98256	1.6587	1.40805	3.5199	3.06238	2.49236	3.2219	2.8832	2.75299	4.72369	3.7066	2.20135	4.39541	2.58034	2.52653	9.25736	6.62012	5.45459	8.07118	4.53616	4.96905
Fam32a	12.0166	10.8923	9.4759	11.6211	10.8852	9.42005	10.7262	9.06902	7.56729	11.7935	11.435	10.0085	13.0235	8.93946	6.51161	9.66286	8.96443	8.2316	11.6865	8.66131	9.56433	11.8037	8.88813	8.02696
Elf3	0	0	0.0195111	0	0.0160443	0	0	0	0	0	0	0	0.0163039	0	0	0	0.013753	0	0	0	0.0180323	0	0	0
Cyp2c29	0	0	0	0	0	0	0	0	0	0	0	0	0	0	0	0	0	0	0	0	0	0	0	0
Stard3nl	1.90186	1.61666	1.73784	1.63762	1.76741	1.26813	1.41268	1.14606	1.00148	0.981809	1.18523	0.815973	1.48422	1.38305	1.08574	1.09504	1.05564	0.983039	0.845645	0.718219	0.625918	0.701531	0.550404	0.469048
Stk11	5.26384	4.72865	5.48673	4.99643	4.70028	4.92117	3.35477	2.86953	1.72393	3.5859	3.63695	2.51059	4.22375	3.43062	2.07756	3.72994	3.23521	2.81885	4.79658	4.08412	4.72596	5.68956	4.52022	3.2487
Efna2	0.0112887	0.0157988	0	0.0179678	0.00760916	0.0180415	0.683157	0.616017	0.427437	0.528822	0.78244	0.350524	1.09799	1.53653	0.677578	1.47555	1.14143	1.13474	1.12142	1.10696	1.00058	0.734472	1.35962	0.533185
Atp5d	8.07093	8.74934	4.85332	10.9113	10.0666	4.55952	12.7376	12.8733	7.81739	15.2262	15.9516	9.45337	18.0801	23.5143	9.46195	19.0931	21.8543	12.4864	37.5295	34.0958	24.9708	37.1799	34.1084	17.4747
Ppp5c	1.65378	1.61444	1.47275	2.20167	1.78908	1.59888	1.03229	1.0948	0.731198	0.95312	1.13756	0.818334	1.54882	1.55509	0.789388	1.46169	1.44805	0.911727	2.01113	1.66839	1.58153	2.25894	2.02112	1.26345
Cdk12	1.92185	1.8497	2.53086	1.70247	1.82315	2.35648	0.959833	0.98976	1.06171	1.11615	0.993592	1.04017	0.889101	0.963203	0.85779	0.840917	0.782757	0.864643	0.443091	0.480576	0.447521	0.480432	0.531498	0.49189
Lipe	1.13377	1.63009	1.43211	1.4693	1.76647	1.47037	0.20509	0.347473	0.234586	0.253949	0.29729	0.129558	0.449825	0.340806	0.351767	0.475997	0.397343	0.389788	0.788336	0.732881	1.03726	0.848174	0.761515	0.747813
Pafah1b2	3.25793	2.70702	3.49747	2.68576	2.53039	2.73108	6.56655	6.80025	6.74288	4.83372	6.07067	5.93813	3.87334	3.8434	4.89176	2.81762	3.07025	2.66991	2.64878	2.42224	2.05073	2.64444	2.21341	1.8128
Tbc1d8	0.406637	0.479934	0.453204	0.369466	0.548187	0.494937	0.376527	0.431637	0.251721	0.534185	0.458422	0.429001	0.152546	0.139872	0.139601	0.173572	0.20294	0.213136	0.0803871	0.0776067	0.0663117	0.0488105	0.0365611	0.0620241
Cnot11	1.3586	1.36313	1.49031	1.39922	1.07064	1.2932	0.992075	0.893409	0.825849	1.03993	0.873494	0.772307	1.06743	1.1695	0.653627	1.44531	1.39104	1.03306	1.34918	1.18171	1.24114	1.34053	1.29381	0.821336
Slc2a3	0.138436	0.103631	0.129309	0.135793	0.132374	0.140209	0.343036	0.278165	0.15644	0.50272	0.375915	0.170351	1.01659	0.857111	0.325548	0.868937	0.928219	0.64025	0.149129	0.107737	0.11585	0.104733	0.126152	0.0844778
Foxj2	4.59477	5.00258	5.3203	5.07993	5.57731	6.17538	2.47561	2.50917	2.13051	2.91657	3.06222	2.23405	3.63018	3.72451	3.03252	3.20084	3.36976	3.58615	2.52259	2.45295	3.40303	2.7944	3.33584	2.02169
Sri	2.23404	2.23073	2.28276	2.4355	2.0078	2.01345	3.76206	3.39411	3.16085	3.82629	4.02749	3.6685	3.57051	3.57194	2.83531	2.77874	3.22405	2.82171	2.44803	2.19908	1.59197	2.31606	2.21741	1.92726
Dgcr2	0.62562	0.578552	0.57053	0.58914	0.669837	0.628527	1.12998	1.02455	0.572536	1.09156	0.989954	0.813294	1.68378	1.27966	0.759272	1.34482	1.16346	1.09105	0.911609	0.710758	0.745214	0.76348	0.705273	0.568319
Irf3	8.11364	8.81229	8.41174	7.53022	10.8456	7.59762	3.41645	5.49113	3.01446	3.4053	5.86132	3.33113	5.33833	7.12439	3.78181	5.24511	5.42747	3.4709	8.85216	7.98637	7.44523	7.89981	7.93757	4.45792
Bcl2l12	0.523628	0.399725	0.390196	0.656648	0.620339	0.380388	0.139524	0.180391	0.170229	0.0412954	0.203041	0.100551	0.07608	0.0671426	0.154445	0.0474973	0.110017	0.103273	0.708437	0.506301	0.913576	0.957102	0.759198	0.416361
Zfp959	0.799853	0.304188	0.384829	0.442815	0.363334	0.291789	0.206857	0.131785	0.131677	0.135758	0.24104	0.198336	0.178652	0.159417	0.0846226	0.121448	0.100466	0.11317	0	0.0947253	0.0263454	0.153199	0.07172	0.0304174
Mpnd	1.24437	1.20855	0.817759	1.62205	1.80045	0.874354	1.94754	1.97566	0.77851	2.05197	2.0018	1.47512	3.94573	3.2531	1.33997	3.41444	2.95649	2.09454	6.40584	4.20762	3.4132	4.44212	3.80519	2.59902
Sh3gl1	2.91068	2.85233	2.30258	2.78729	3.35585	2.26859	2.40202	2.26038	1.91981	2.23986	2.69268	1.57935	2.76333	2.66813	2.35605	2.3556	2.55544	2.12218	2.42161	2.61872	2.82535	2.82735	2.63284	1.54738
Ebi3	5.18026	6.28198	4.44632	5.35291	5.66725	4.59464	0.0841704	0.0616673	0.0171157	0.211754	0.0578417	0.0515604	0.111464	0.172147	0.0586637	0.0811855	0.109694	0.196134	0.0302727	0	0.0205466	0.0367627	0	0
Yju2	0.905654	0.896292	0.996884	0.998749	0.898242	1.13724	0.669197	0.637372	0.408235	0.614497	0.758787	0.541109	1.21408	1.0858	0.706606	1.04565	0.695209	0.776564	0.953105	0.835715	0.901725	1.28896	0.864505	0.678977
Ranbp2	6.38134	4.63021	7.31319	5.52908	4.12233	5.8921	2.15638	2.40588	2.80645	2.22998	1.98368	2.61806	1.7573	1.57787	1.65014	1.73743	1.48235	1.83901	0.948014	0.805283	0.911058	1.36181	1.02307	0.970792
Edar	0	0.00111087	0	0	0	0	0.00246333	0	0	0.0030986	0.0016928	0	0.00543683	0.00447827	0.00515056	0.00633594	0.0082551	0	0.00708768	0.0086482	0.039687	0.0139867	0.0196436	0.0194393
Grk5	0.0247817	0.0274234	0.0278719	0.0266018	0.0330197	0.0184212	0.0593205	0.0528521	0.0327326	0.0738688	0.0543874	0.033599	0.106978	0.089824	0.0585884	0.0897069	0.0779195	0.0866883	0.014152	0.00762477	0.0187738	0.0179671	0.0175907	0.012098
Dvl3	3.01516	4.08792	3.43838	4.02703	3.99888	3.37427	8.96383	8.33149	7.62871	12.2564	10.6949	7.70906	9.07853	8.88962	7.98232	9.8403	10.0051	8.52999	8.11759	9.76092	10.6226	11.031	8.80921	8.14982
Abcf3	2.95216	3.05974	2.76992	2.33464	3.2727	2.55935	3.71658	3.4758	2.43715	3.39455	3.81619	2.75907	4.65465	4.13779	2.27406	3.81636	3.73328	2.77267	3.8754	3.49683	3.09448	3.8191	3.07863	2.04622
Eif2b5	3.31452	3.45927	4.05216	3.52006	3.75917	3.7424	4.92084	4.42403	2.76988	4.72521	4.83716	3.91402	6.02057	5.08994	2.74657	3.75869	3.54259	4.08215	5.24003	3.19577	4.06213	4.53873	3.39682	3.2256
Cyth2	2.82757	2.97317	3.00448	2.92891	2.93452	2.91701	8.84479	8.64015	5.81579	7.51452	8.31155	9.9829	6.65058	6.56266	5.85708	4.538	6.09409	5.55014	5.49389	4.30793	4.27282	4.10644	5.24516	3.41532
Sult2b1	0.0173862	0.00912464	0.01247	0.0121069	0.00732448	0.0173665	0.022482	0.0197656	0.0164578	0.0127259	0.0231743	0.0247893	0.0267948	0.0383171	0.03173	0.0542118	0.0226024	0.0282893	0.00970302	0.00507401	0.0214033	0.0103103	0.00717122	0.00190088
Car11	0.319285	0.532779	0.241584	0.215005	0.397318	0.628032	3.79836	3.83458	1.76692	6.16815	5.25101	2.73921	10.0264	10.2367	3.77177	12.3756	12.2182	9.60876	3.72826	5.73419	5.00506	5.32653	5.34881	3.95269
Dlgap1	0.0125493	0.011416	0.0116582	0.0162013	0.0170117	0.0127022	0.121958	0.111175	0.0740911	0.22635	0.162663	0.168414	0.210023	0.2306	0.105937	0.25071	0.256438	0.238778	0.134625	0.11481	0.140386	0.171709	0.1531	0.145986
Plag1	0.117492	0.0866603	0.124939	0.151627	0.136986	0.126874	0.0821232	0.108301	0.172338	0.0206604	0.0406331	0.0704288	0.0348008	0.0716628	0.0892895	0.0316843	0.0421989	0.0459273	0.0354436	0.0766096	0.0841968	0.0215211	0.0445321	0.074991
Hck	4.14846	4.69307	5.45435	3.72405	4.80771	4.98355	0.0286098	0.0356335	0.0506138	0.0377874	0.0398127	0.0753599	0.0132604	0.00975222	0.0104685	0.0303548	0.031959	0.052	0.0123477	0.0344374	0.00838064	0.0168693	0.0159702	0.00483799
Mrpl4	4.49989	4.2121	3.49692	5.20894	4.45124	3.64253	6.19662	6.65857	4.42556	7.92141	8.6724	6.06105	8.97983	10.5097	5.08778	10.4765	10.096	7.55074	11.1325	12.8862	11.1124	10.7863	11.5702	7.88879
Keap1	1.24635	0.751257	1.02163	0.854395	1.00646	1.02553	1.60846	1.61801	0.91892	1.69408	1.36192	1.29027	1.96097	1.5839	1.3279	1.25591	1.72545	1.42782	1.61153	1.43094	1.30879	1.31304	1.38445	0.85268
Ap1m2	0.00657999	0.00460442	0	0.0104731	0.00443524	0	0.00340341	0	0	0	0.0105247	0	0	0	0	0.0131309	0.00380183	0	0	0	0	0	0	0
Glg1	2.45078	2.54507	3.08725	2.45854	2.89722	2.89003	3.24858	2.94994	2.81196	3.3743	2.6454	2.53545	3.4032	2.79535	2.75045	3.3563	2.85893	3.17228	1.68611	1.7352	2.01644	2.26742	1.86082	1.89165
Atp8b3	0	0	0.00498561	0	0	0	0.0503357	0.0645371	0.0153533	0.039573	0.0551287	0.0501056	0.0374949	0.0815001	0.0427564	0.0303442	0.014057	0.00439846	0	0	0.0138232	0	0	0.0106399
Btbd2	1.17581	0.840051	0.977289	1.00118	1.46873	0.959296	1.2121	1.15289	0.627862	1.34814	1.56069	1.01084	2.4781	2.62687	0.938159	2.19055	2.47044	1.65304	2.49634	2.07331	1.83135	1.81111	2.33335	1.32331
Csnk1g2	3.88174	2.89738	3.02411	3.87603	3.40367	3.29806	2.07299	1.91104	1.59541	2.28381	2.40925	1.93001	2.48612	2.59718	1.84427	2.12527	2.5457	2.07775	2.74034	2.17921	2.33747	2.51387	1.88299	1.77015
Abhd17a	5.50961	4.55188	2.84084	5.61526	4.85184	3.8346	11.1693	10.6953	7.16698	7.01909	9.95922	7.28686	12.125	11.7195	10.4756	7.85601	10.7722	7.68591	9.99821	7.70425	7.1899	8.9015	7.16946	4.52368
Mob3a	0.362427	0.646463	0.407757	0.497684	0.60834	0.56219	0.345516	0.312387	0.201808	0.221934	0.269012	0.144104	0.175233	0.320752	0.222879	0.113451	0.197088	0.16959	0.222096	0.149324	0.323016	0.245629	0.298978	0.242412
Cacnb3	0.329915	0.340218	0.27043	0.352378	0.351125	0.416262	3.04017	3.34928	3.2764	3.19719	4.09199	3.29551	4.94178	5.58409	5.68532	4.59128	6.3557	4.43888	1.20164	1.35134	1.11155	1.30626	1.23187	1.09351
Ccdc65	0.0235669	0	0	0.00625174	0.0158852	0.0125547	0.162529	0.190522	0.128893	0.127777	0.167534	0.149341	0.0807115	0.0831017	0.0722139	0.0940591	0.172477	0.142022	0.184133	0.220089	0.15473	0.340737	0.291616	0.082452
Fkbp11	0.0930436	0.260433	0.127112	0.0493646	0.209053	0.148701	0.128335	0.211555	0.137006	0.221968	0.0992155	0.157229	0.382385	0.503073	0.134167	0.185676	0.394236	0.29157	1.177	0.796517	0.892834	0.987921	0.921056	0.86807
Ddx23	4.43671	3.61037	5.17263	4.2871	3.9784	4.43302	3.20515	3.41333	2.47469	4.09268	3.47155	2.79454	3.73567	3.42628	2.46788	3.34522	3.24011	3.17458	3.1147	2.39043	3.12285	3.40148	2.64976	2.08371
Pld3	6.56469	6.16153	5.66111	8.2957	10.4356	8.64302	2.66251	2.60657	1.56944	3.83749	3.69419	2.72954	8.22957	8.54439	3.87996	9.67995	14.2367	8.06883	6.58335	6.35564	6.60689	6.56358	7.38382	4.9776
Grik5	0.0798695	0.105126	0.0919678	0.105938	0.14869	0.117009	1.33475	1.14725	0.584436	2.27039	1.78041	1.1207	2.99717	2.92768	1.25042	2.979	3.40503	2.69127	1.84028	1.82922	2.03994	1.93709	2.35938	1.47036
Cd79a	0.0246777	0.0863424	0.141597	0.0392785	0.0998039	0.0985987	0	0	0	0	0	0	0.0169032	0.0174037	0	0	0.0142584	0.0356919	0	0.0384105	0	0	0	0
Rabac1	5.93843	9.5022	3.89416	7.84512	10.514	3.32175	11.7334	10.2617	8.01976	9.24713	11.947	6.02099	20.6361	23.7601	14.0435	18.0129	21.662	12.9119	34.2905	27.7293	23.5735	30.2119	24.7226	16.1017
Etv3	3.23932	2.86445	3.08459	2.53306	2.70489	2.57564	1.10866	0.940511	0.864477	1.07477	0.773328	0.903812	1.25842	1.01155	0.688457	1.20603	0.963755	0.90905	0.575626	0.445248	0.390688	0.431434	0.638142	0.42993
Prkcsh	4.96587	5.24517	4.69345	5.5013	6.55414	4.60875	11.3672	9.65769	6.00481	9.25252	10.6849	7.82417	11.1811	10.3963	6.38946	8.88141	9.46179	7.55114	9.84221	8.05339	7.77635	9.40516	9.2064	5.00817
Elavl3	0.112369	0.0718915	0.115793	0.0664311	0.106039	0.133407	8.10046	9.02505	10.3066	4.94016	7.04557	6.22552	3.46575	3.44839	7.53979	2.30648	3.56718	4.06304	0.605615	0.79205	0.544813	0.644064	0.476726	0.384714
Rab3b	0.0110967	0.0181185	0.0151599	0.0250214	0.0236858	0.0325134	0.209497	0.190633	0.164565	0.191326	0.250461	0.158217	0.393974	0.456509	0.227018	0.610816	0.630468	0.308951	0.0743153	0.0705269	0.0700544	0.132864	0.132734	0.0517646
St8sia6	0.00913938	0.014535	0.0238366	0.00330609	0.00896058	0.00531142	0.00429748	0.00125942	0	0.00270288	0.00398685	0.00105301	0.00796738	0.012305	0.00269567	0.0132643	0.00720084	0.00660924	0.00278213	0.00129321	0.004406	0.00337858	0.000685397	0.00363357
Fcgrt	14.5318	10.7201	9.38221	16.0236	13.0922	8.20202	0.0509393	0.116108	0.0759608	0.0854348	0.099182	0.152553	0.127419	0.162061	0.04142	0.152858	0.20232	0.213658	4.97105	2.80177	3.02577	3.49302	4.08919	2.37363
Nosip	1.95055	2.10271	2.00011	2.56519	2.64476	2.004	1.85029	1.48974	1.49232	2.12166	2.27668	1.45557	3.05896	2.71403	1.98325	2.36704	2.12781	1.87893	3.19427	2.35026	2.08243	2.76129	2.12471	1.3833
Pih1d1	3.38268	2.69904	3.3138	3.61127	3.82333	3.01624	1.32291	1.28188	0.689874	1.54329	1.63858	1.05872	2.85386	3.24385	0.914582	2.69605	2.30008	1.59601	3.13104	2.31151	1.95321	2.89366	2.75645	1.26286
Rps11	33.7504	38.6354	26.3409	46.3271	34.2992	30.9345	11.1009	10.5379	5.89814	15.4651	16.8565	12.0646	14.6609	18.2687	7.58091	15.7154	15.5671	13.6429	16.0345	16.1637	13.4616	16.6177	14.2779	10.6979
Supt5	2.96932	2.97379	3.38955	3.31465	3.83168	3.36009	3.59481	3.70798	2.90195	3.47811	3.78255	3.07817	3.66163	3.8052	2.93649	3.2312	3.65005	2.61207	2.44123	2.28372	2.42686	2.52902	1.90699	1.77356
Dll3	0.0136843	0.00957571	0	0.0217807	0	0.010935	0.693644	0.487454	0.0863569	1.0506	0.802558	0.320848	2.83068	3.17508	0.90276	3.236	2.58545	2.53335	0.778975	0.66028	0.673839	0.927428	0.47412	0.287258
Paf1	11.4841	10.3876	11.275	10.8145	10.6406	8.40967	20.8951	18.7931	12.9099	18.6797	18.0735	13.7825	18.2616	16.3805	11.1919	14.1116	11.2225	10.0406	12.7771	10.245	7.03554	11.5621	8.17899	5.66831
Timm50	2.30227	2.43558	1.82772	2.51027	2.72489	1.98458	3.33804	2.84405	1.33849	3.77428	3.36352	1.97586	6.35748	6.11108	2.69573	6.71065	5.16377	4.73254	5.96906	4.93782	4.66931	5.84814	3.45447	3.06019
Med29	0.307896	0.253475	0.25238	0.259446	0.31741	0.217091	0.41219	0.288263	0.205733	0.447786	0.540761	0.241019	0.731931	0.89411	0.391747	0.433715	0.596482	0.576291	0.727762	0.662473	0.672315	0.54009	0.522927	0.55445
Bicd1	0.0192381	0.015616	0.0157694	0.0146979	0.0202292	0.0110686	0.438228	0.500992	0.488051	0.633853	0.465263	0.501294	0.487032	0.572007	0.412787	0.588153	0.432172	0.561498	0.0996352	0.121572	0.153321	0.196096	0.128231	0.171634
Ncstn	11.3239	11.9628	15.4122	13.1825	14.1774	16.1736	6.97435	6.60724	5.62664	6.92069	6.56236	6.46229	8.37727	7.0771	6.44499	7.5467	6.78831	8.54236	5.41464	4.57998	5.94441	6.36429	7.00462	5.0359
Pex19	2.94129	2.81828	2.93117	3.09836	3.2659	2.66244	7.11434	6.36392	4.62113	6.36836	6.52657	6.45779	7.03877	7.30747	5.33901	6.12531	5.62719	6.081	8.0917	5.86983	6.33335	7.90748	7.14821	5.19864
Phyhip	0.282572	0.248997	0.18873	0.108275	0.282174	0.200712	0.243595	0.674216	0.356644	0.483455	1.36708	0.590245	2.22224	3.97087	0.814928	3.00744	6.18599	1.95263	0.572392	0.692309	0.443992	0.496504	1.74395	0.787233
Crhr2	0	0	0	0	0.00186444	0.00221031	0.00143069	0	0	0.0035993	0	0	0	0.00390143	0.00299142	0	0.00639269	0.00200028	0	0.00215264	0	0	0	0.00725799
Inmt	0	0	0.0220554	0	0	0	0	0	0	0	0	0	0	0	0	0	0	0	0	0	0	0	0	0
Cyp4f18	0.0562087	0.0747321	0.0737184	0.0626256	0.0416762	0.0494075	0.00290732	0	0.0106415	0	0	0	0.00385006	0.00792815	0	0	0	0.00812959	0.0125478	0.0262464	0.0127746	0	0	0
Impdh1	0.104449	0.0783098	0.0978469	0.160309	0.105605	0.0894259	0.208381	0.214869	0.0800387	0.354348	0.369931	0.20802	0.521241	0.568247	0.177508	0.803966	0.806092	0.318319	0.0999283	0.203216	0.135646	0.19214	0.160017	0.0978827
Psg18	0	0	0	0	0	0	0	0	0	0	0	0	0	0	0	0	0	0	0	0	0	0	0	0
Dusp3	2.23916	1.68217	1.73107	2.51505	3.02366	2.30993	4.14465	4.30227	5.77985	2.76267	3.35794	3.13684	3.10336	3.40653	5.36968	2.74232	3.39666	3.0165	1.83895	2.14475	2.22961	2.41591	2.0572	1.8013
Prodh	0.127425	0.0863806	0.130562	0.139437	0.13152	0.12728	0.0329545	0.0633781	0.0427199	0.0829062	0.0721849	0.0555142	0.117283	0.14884	0.0301456	0.127143	0.174858	0.118066	5.60914	4.77555	5.77691	5.01969	6.61908	4.89351
Ess2	2.29004	2.09496	2.27088	2.23143	2.30411	2.49053	2.31121	2.13356	1.89635	2.54384	2.40026	1.92546	3.46618	3.37188	2.12026	2.80886	2.63341	2.63356	2.95509	2.86023	2.5219	3.11922	2.68164	1.44608
Slc25a1	4.68092	3.46984	3.83692	4.6723	5.50818	3.51859	26.4274	28.0208	21.4789	15.4858	22.8421	11.9655	25.4053	26.7172	29.8164	14.0513	21.7283	17.9006	24.3968	16.6091	24.4021	21.1584	20.0926	17.8341
Dgcr6	0.183602	0.283537	0.24391	0.292232	0.337132	0.288371	0.726981	0.642984	0.347597	0.87327	0.982282	0.65395	1.50044	1.42879	0.71209	1.30764	1.25837	0.979781	2.61465	1.71958	2.06719	2.50583	2.21966	1.40654
Ddr1	0.0618623	0.0216444	0.0211284	0.0205133	0.0138994	0.0411947	6.15951	6.63042	5.80709	2.94826	4.99416	4.56044	4.22317	4.8027	7.88343	1.9495	3.72623	3.62364	3.02665	3.05714	3.67108	3.32964	3.26181	2.23648
Ier3	4.89204	8.05472	14.2315	8.85518	10.8623	15.1002	1.14114	0.4362	0.1816	2.43398	2.0457	1.27648	4.33637	2.77359	1.14113	3.82841	2.05064	2.49722	0	0.82116	1.16268	0.195029	0.949552	0.503397
Fosb	0.678668	1.80916	1.90732	0.540104	2.35263	1.32997	0.0835792	0.195949	0.0815782	0.6308	0.155076	0.102396	0.121749	0.364667	0.200968	0.16123	0.662879	0.397303	0.486972	0.364688	0.526379	0.197124	0.266598	1.28614
Klc4	1.84469	0.961383	1.41086	1.75676	1.45152	1.15336	0.367286	0.415336	0.272766	0.396722	0.399173	0.391285	0.893463	0.838273	0.429888	0.477482	0.472716	0.401878	1.03381	0.738835	0.877081	0.805576	0.821362	0.513073
Ercc1	0.748743	0.807152	0.688385	0.76497	0.750215	0.679168	1.0467	0.912563	0.517204	1.46804	1.24077	0.679647	1.78807	2.01228	0.776928	1.99896	1.59015	1.25853	1.79569	1.51188	1.14978	2.07779	1.38557	0.849594
Cyp17a1	0.0197849	0.0138447	0.0486527	0	0	0.0158099	0.0102335	0	0	0	0.0105486	0	0.0135518	0.0139531	0	0	0	0.0143076	0	0	0	0	0	0
As3mt	1.20823	0.889968	0.758709	0.998091	1.14779	0.872323	0.308815	0.227591	0.149373	0.28502	0.301373	0.203723	0.43073	0.308945	0.21778	0.296101	0.344966	0.357672	0.863572	0.907301	0.583446	0.823644	0.923845	0.469683
Homer3	0.340036	0.317259	0.304064	0.319813	0.305602	0.395229	0.453022	0.570097	0.643757	0.650302	0.560369	0.718258	0.345836	0.341544	0.362173	0.359847	0.339355	0.417286	0.586561	0.497185	0.624486	0.460908	0.493011	0.279391
Crtc1	0.477684	0.53773	0.524343	0.446269	0.55297	0.423204	1.08606	1.07195	0.706444	1.40128	1.25903	0.814667	1.81236	1.73421	0.956849	1.41745	1.9704	1.5665	1.08722	1.12011	1.29332	1.29778	1.01084	0.826539
Rnf215	4.41946	3.48262	4.6017	4.13501	4.87097	4.50194	1.67839	1.6295	1.18092	1.78743	1.94236	1.69043	2.95896	2.87812	1.66855	2.74116	3.05961	2.15945	10.9546	9.97741	7.96292	10.3349	9.3443	6.12913
Sec14l2	0.117153	0.0788264	0.0960301	0.121922	0.173121	0.140425	0.503414	0.618124	0.400938	0.49252	0.509308	0.434012	0.793192	0.645084	0.553094	0.624936	0.65607	0.596304	1.64461	1.84452	1.4132	1.59409	1.88827	1.3991
Aven	0.0310529	0.0281897	0.02339	0.0207053	0.0299825	0.0147543	0.0230073	0.0235351	0.011652	0.0283946	0.0246108	0.0138277	0.0264436	0.0183485	0.010438	0.028472	0.0198816	0.01578	0.0140515	0.025473	0.012716	0.022752	0.0152314	0.010277
Cp	1.06092	0.961113	0.908901	0.98775	0.667436	0.920696	0.304465	0.266295	0.142541	0.648697	0.429404	0.361447	0.993913	0.960596	0.544074	1.35679	0.768537	1.17639	0.025466	0.0426143	0.0622232	0.044842	0.0432887	0.0219513
Crot	2.82582	2.53819	3.19427	2.4	2.43213	2.54035	1.05692	1.22054	1.28713	1.29737	1.14212	1.29248	1.50891	1.64467	1.08853	1.56138	1.17846	1.32664	3.75186	3.83082	4.54622	4.20613	3.88831	4.30875
Rps6ka1	8.01277	7.69503	6.50549	7.32479	8.48616	6.49438	0.109265	0.104514	0.125906	0.114537	0.150174	0.167332	0.154744	0.113805	0.134856	0.0966081	0.132228	0.178228	0.261989	0.137002	0.257834	0.242594	0.261398	0.156542
Calb2	0.0193513	0.0189578	0	0.0123202	0.010435	0.0123708	0.0720662	0.0703988	0.0244239	0.115832	0.103174	0.0465982	0.418851	0.35483	0.0606916	0.420925	0.474071	0.215509	0.190075	0.114456	0.0791635	0.154757	0.143671	0.10494
Snrnp200	8.08009	6.89908	7.48908	8.68985	7.57996	7.59999	6.63324	5.70819	4.79267	7.83987	6.07077	5.80141	7.3802	6.41725	4.98055	6.89357	6.18907	6.38732	4.4763	4.32103	4.98683	6.04135	4.31424	4.07506
Ciao1	4.85551	4.70358	4.61741	3.67164	4.91511	3.32769	4.2364	3.69311	2.79155	4.15971	4.52348	3.95287	5.75212	4.81353	2.87787	3.41376	4.85213	3.39885	5.55461	4.45115	4.14963	4.87171	4.64691	3.08318
Has1	0.030007	0.00699925	0.00819886	0	0.00674207	0	0.0310415	0.0379041	0.0315608	0.032539	0.0479962	0.0126768	0.123321	0.0634866	0.0324522	0.0798418	0.167597	0.0723329	0.212123	0.031137	0.0530422	0.00677892	0.00825124	0.0787378
Taf6l	3.6262	4.20356	3.51133	3.5518	4.27742	3.60616	1.99412	1.74412	1.2825	1.763	2.01304	1.80548	1.42613	1.88991	1.45986	1.66993	1.99732	1.53449	2.57971	2.26386	2.20371	2.16053	2.80235	1.45515
Insig2	2.25607	1.9351	2.36336	1.6983	1.86116	1.64809	0.984047	0.934696	0.826084	1.10363	1.21633	1.27495	1.05808	0.825222	0.748816	0.776959	0.851184	0.879671	0.798673	1.07115	0.899205	0.987013	0.944441	0.949832
Kpna6	1.82068	2.24763	1.71237	2.07978	2.23183	2.02893	2.40449	2.88183	2.11036	2.55182	2.43892	2.10081	2.91835	2.76603	2.28605	2.73528	2.81239	2.54969	2.57596	2.56718	2.61158	2.68052	2.70416	2.26052
Man1a	1.32388	1.37363	1.60169	1.26111	1.34041	1.51998	0.958808	0.940469	1.51683	0.270017	0.588576	0.754774	0.338748	0.38195	1.35135	0.0676351	0.256572	0.315625	0.0501825	0.0516766	0.0476837	0.0379709	0.050212	0.0362993
Itpkc	0.0884901	0.181896	0.290139	0.171656	0.175212	0.251911	0.057213	0.0628754	0.0488628	0.0611725	0.0442312	0.0385517	0.030306	0.101411	0.0358878	0.055184	0.0926703	0.0439949	0.0925973	0.142038	0.0460881	0.0487278	0.104935	0.120936
Coq8b	0.486319	0.326962	0.406449	0.326317	0.517415	0.380994	0.310729	0.289085	0.2046	0.390862	0.33555	0.314218	0.34617	0.544721	0.26813	0.361554	0.352613	0.206874	0.707791	0.775502	0.715168	0.791673	0.617502	0.5463
Brd8	4.04757	3.60043	4.45369	3.73438	3.37873	3.54869	3.70453	3.59802	3.03052	5.12409	3.54307	3.80823	4.46092	4.23178	2.70805	4.70032	3.05212	3.67782	1.72544	2.72644	2.34564	2.90746	2.31276	2.09615
Kif20a	0.301783	0.249572	0.427276	0.818755	0.379095	0.306921	0.21995	0.363878	0.129849	0.473021	0.212096	0.182544	1.49394	1.83808	0.34121	1.90251	0.824278	0.605114	1.07177	0.886066	1.04958	1.46889	0.7808	0.443929
Farsa	1.42408	1.14565	1.14349	1.16416	1.50842	0.998628	1.81391	1.76949	0.886464	1.75224	1.71482	1.15412	2.0504	2.28876	0.822447	2.07823	1.74079	1.68838	1.48139	1.63603	1.40909	1.71363	1.55038	0.847338
Gcdh	2.33654	1.74549	2.3423	2.24897	1.98996	2.10681	2.84171	2.95545	1.99259	2.5063	2.88714	2.82122	3.44957	3.03957	2.01472	2.55191	2.90072	2.34045	5.83273	5.13574	4.9993	6.3877	5.26151	3.75595
Mast2	0.436371	0.41577	0.35274	0.454224	0.426955	0.401187	0.338952	0.312418	0.169611	0.478431	0.374347	0.286571	0.832046	0.692698	0.413551	0.894165	0.798265	0.703746	0.47864	0.343716	0.394638	0.495294	0.38738	0.351301
Dnase2a	2.20226	2.15516	1.82554	2.33244	2.37733	2.27585	0.0942107	0.131772	0.0626967	0.0915733	0.0573844	0.0682037	0.12476	0.145971	0.107446	0.165218	0.176993	0.173628	0.378882	0.225513	0.363779	0.162721	0.204893	0.311383
Rad23a	2.48568	2.8656	2.75575	3.00285	3.5197	3.04374	3.69982	3.75427	2.92285	3.78134	4.35722	3.81889	4.60555	4.91851	3.5972	4.06822	3.90562	4.34515	4.53094	4.59262	4.61963	5.04177	5.60573	2.87798
Calr	50.5173	61.2614	51.6795	53.7282	74.0585	54.4529	59.3444	63.4815	29.431	63.135	56.5978	39.2265	73.5436	75.0787	32.2974	63.5843	64.7517	53.1668	51.7677	46.5737	40.9267	48.3536	53.5332	32.449
Syce2	0.413127	0.232305	0.356779	0.387489	0.387866	0.324231	0.145	0.184512	0.0744889	0.263992	0.188799	0.102848	0.621532	0.556695	0.183504	0.669847	0.502974	0.51749	0.823432	0.465046	0.391215	0.774972	0.535545	0.290367
Nfat5	3.0552	3.2581	3.76216	2.67434	2.74923	2.98551	1.28164	1.52102	1.80427	1.34707	1.31522	1.39952	1.29705	1.35494	1.50569	1.29408	1.14359	1.51222	0.638245	0.75351	0.764882	0.948252	0.831756	0.907266
Nob1	1.11612	1.05901	1.07769	1.03126	1.16673	1.13375	1.87377	1.49827	0.966984	1.73544	1.91635	1.3666	2.58502	2.52817	1.0434	2.29337	1.80348	1.36802	1.43582	1.26611	1.18948	1.46158	1.4201	0.678393
Nqo1	0.00793323	0.0166541	0.0130057	0	0.00534739	0.0253575	0.0574471	0.0420885	0.0300384	0.0671005	0.0338379	0.025136	0.206489	0.100707	0.055768	0.221639	0.224602	0.195058	1.15113	1.3521	1.68279	1.35491	0.804958	1.18655
Ppfia3	0.0979854	0.0953967	0.0523814	0.0610275	0.137837	0.085108	0.409861	0.33903	0.319931	0.376968	0.511068	0.202475	1.09428	1.14471	0.59896	1.11371	1.39814	0.751723	0.247269	0.222138	0.180735	0.230984	0.499045	0.141598
Gys1	0.305647	0.351375	0.425019	0.447394	0.504017	0.423059	0.601315	0.628769	0.220439	0.855819	0.762425	0.446169	1.00565	1.02389	0.383678	1.07285	0.911378	0.793348	1.6875	1.56738	1.75729	1.76075	1.828	1.13141
Ruvbl2	2.60452	2.33163	2.39731	2.28119	2.6775	1.90103	3.69151	3.04368	1.63904	4.3027	3.93708	3.25021	4.89849	4.26881	1.99455	4.37725	3.9429	3.55653	4.96968	3.55	4.17769	5.52726	3.43889	2.74896
Lin7b	0.088297	0.0926802	0	0.175673	0.267824	0.176394	0.159847	0.234223	0.222886	0.20107	0.447231	0.111906	0.665276	1.52563	0.143238	0.792916	1.04585	0.255412	0.246387	0.274866	0.167227	0.0598418	0.509873	0.0772299
Bax	1.00544	0.543667	0.655578	0.927458	0.646912	0.60258	1.76108	1.80116	1.0527	1.24887	0.852835	1.70869	1.56519	1.43427	0.654894	1.36803	1.00343	1.37157	1.32629	1.49382	1.02136	1.23895	0.79172	0.599604
Il7r	1.45709	1.94034	1.65773	1.38453	1.7705	1.38242	0.00756181	0.00369343	0.0153766	0.0158532	0.0103929	0.0030881	0.00333794	0.00343679	0.00790546	0.00486243	0.00281568	0.0246688	0	0	0	0	0	0
Tfam	2.9953	1.87537	2.95692	2.35423	1.93147	2.00819	2.61891	2.26313	1.89609	2.73318	2.53146	2.4211	3.09971	2.26937	1.47928	2.22995	1.39309	1.77042	1.74927	1.40009	1.06783	1.81633	1.30814	1.2491
Zfp81	0.535169	0.588485	0.50794	0.448319	0.455659	0.527327	0.53905	0.521495	0.644984	0.832528	0.716553	0.627265	0.633914	0.675389	0.539613	0.686553	0.748623	0.771116	0.211091	0.147181	0.164609	0.220894	0.26887	0.190052
Efnb3	0.194418	0.326511	0.318727	0.32492	0.314514	0.388395	43.1705	41.656	52.8553	15.1792	28.5783	26.5867	28.9108	25.7633	63.4041	12.7256	21.5453	20.2457	4.9694	5.25027	5.39063	5.36278	5.45297	2.92486
Mmd	0.403869	0.291176	0.270859	0.334397	0.36847	0.28361	0.196236	0.225706	0.0746586	0.273385	0.337132	0.175789	0.737688	0.604175	0.275745	0.663487	0.740122	0.592975	0.719441	0.603219	0.608827	0.78244	0.528352	0.724338
Hlf	0.533469	0.676226	0.59499	0.309713	0.446533	0.415808	0.506626	0.550139	0.20558	0.761037	0.69475	0.411484	1.53499	1.57428	0.725904	1.62959	1.61695	1.69176	2.49404	2.75475	3.18011	2.79312	2.84787	3.14767
Fam162a	0.187881	0.242028	0.206507	0.186902	0.253283	0.184256	0.598535	0.530749	0.441927	0.777896	0.910655	0.719762	0.731197	0.83717	0.411	0.673173	0.680938	0.645375	1.51085	1.409	1.0772	1.47012	1.3949	0.929971
Rpl8	151.802	158.557	93.1927	198.556	157.711	103.805	80.607	70.2555	36.1588	99.3544	97.0322	55.6087	129.135	145.179	45.6129	128.715	115.41	88.406	167.48	126.412	110.45	161.707	111.02	67.8752
Grm3	0.00892738	0.012147	0.0101635	0.00631526	0.0187211	0.00990805	0.0128266	0.018043	0.0118935	0.0132302	0.0153371	0.0100572	0.0621679	0.0668072	0.0343283	0.115799	0.131532	0.0667113	1.2118	1.38066	1.47323	1.64604	1.52936	1.45193
Ssbp2	0.114377	0.119029	0.129814	0.0956927	0.105101	0.103506	0.0839366	0.0840939	0.0687867	0.0868198	0.101897	0.0656653	0.155683	0.207864	0.110218	0.171187	0.178488	0.177798	0.221504	0.241553	0.209586	0.21632	0.197174	0.167163
Fancl	0.213463	0.151313	0.196562	0.165468	0.143885	0.156177	0.0817329	0.0735386	0.0551085	0.0992036	0.0931184	0.0720266	0.135769	0.117306	0.0831987	0.145221	0.106518	0.110263	0.0742636	0.0949294	0.0651052	0.0967606	0.0846159	0.0400088
Brinp2	0.0171224	0.0142281	0.0105264	0.0110715	0.0158694	0.00513089	0.223623	0.208446	0.0769885	0.387822	0.254474	0.156651	0.776255	0.659621	0.24941	0.982362	0.795777	0.627625	0.204255	0.154908	0.167007	0.24877	0.203927	0.11513
Gstm5	1.86672	1.56751	2.1762	2.40996	2.93594	2.58558	26.327	24.0201	20.5238	21.4299	28.4205	19.0319	32.5338	36.4521	31.9648	26.6558	34.2984	34.1084	280.682	259.011	272.243	210.941	265.413	234.68
Gstm7	0.238432	0.197181	0.0888372	0.155251	0.248378	0.173209	9.30552	7.88549	8.41248	3.93468	7.68523	5.26075	7.17105	8.49935	11.1115	3.82811	6.32458	5.2668	4.23392	4.09916	4.00668	4.31896	3.43314	3.03342
Gstm3	0	0	0	0	0	0	0	0	0.0134242	0	0	0	0	0	0	0	0	0	0.047487	0.0331099	0.0161151	0	0.0175481	0.0186059
Stat3	3.61726	3.25529	3.57344	3.4694	3.56682	3.59527	1.88114	1.82824	1.6752	1.8024	1.55964	1.46221	2.70943	2.31395	2.06933	2.51799	2.23253	2.32854	1.70564	1.83313	2.41287	2.24293	2.26906	1.99532
Stat5a	0.464932	0.450968	0.449022	0.468919	0.42509	0.434057	0.0571438	0.0174443	0.0290499	0.0778707	0.0466321	0.04959	0.0693672	0.0551894	0.0423164	0.0688967	0.0691528	0.15313	0.565188	0.318841	0.387091	0.424293	0.55442	0.318079
Cavin1	0.0419838	0.064633	0.0206483	0.0133648	0.0282992	0.0670978	0.0217156	0.0381837	0.00529893	0.0382421	0.035815	0.00532094	0.126531	0.0769827	0.027243	0.0670256	0.116437	0.103227	0.693547	0.980209	0.585223	0.711346	0.928185	0.609578
Map3k11	4.34224	4.6049	4.5664	5.61213	6.04663	4.98959	3.62576	3.7247	3.05888	2.31051	3.36054	3.10892	2.58229	2.45105	4.20917	1.64573	2.65962	2.48898	1.77524	1.7879	1.74677	1.85926	1.6383	1.3764
Akt2	0.511339	0.474274	0.446821	0.552822	0.554395	0.481848	0.324367	0.2998	0.216141	0.431557	0.336928	0.288876	0.541889	0.462679	0.294763	0.558342	0.536539	0.441294	2.27221	2.16618	2.67325	2.72828	2.80351	2.16451
Dnaja3	0.382666	0.304625	0.290648	0.244468	0.33721	0.230041	0.420373	0.451002	0.316815	0.314072	0.393075	0.268076	0.455687	0.474133	0.283809	0.397584	0.369176	0.308464	0.46043	0.409827	0.405588	0.387829	0.464822	0.307067
Hmox2	1.04188	1.14303	0.88056	0.983746	1.12682	0.84902	0.925565	0.990402	1.15712	0.645321	0.757921	0.682608	0.834598	0.904979	1.17134	0.704797	0.613888	0.753446	0.624165	0.572624	0.568559	0.628324	0.577842	0.465942
Cdip1	1.45793	1.0785	1.51455	1.20762	1.31563	1.34809	3.27954	3.4209	3.86984	2.26301	2.87925	2.45298	2.85727	3.15382	3.87746	2.17612	2.76263	2.40126	3.68301	3.42934	3.67859	3.38571	3.4878	2.66228
Map3k20	0.342219	0.306757	0.334508	0.293437	0.277113	0.260154	0.132756	0.156081	0.154328	0.173397	0.105762	0.15401	0.138465	0.154313	0.144112	0.194906	0.130362	0.170279	0.0870433	0.134343	0.0934922	0.105704	0.0918124	0.107943
Cwc15	6.86119	6.06203	5.63386	7.14117	5.26019	5.19667	8.09141	7.78663	7.24407	8.2139	8.24517	7.94714	9.27664	8.49104	6.96216	7.88185	6.61867	6.3424	7.13886	7.6427	5.00799	7.25409	6.47702	5.32281
Col5a3	0	0.00184741	0	0.00420208	0	0	0.0942222	0.128059	0.056646	0.154593	0.15765	0.0786301	0.365283	0.409614	0.194153	0.397768	0.355417	0.408567	0.132605	0.145877	0.124002	0.125248	0.135028	0.161641
Dnmt1	1.82742	1.82499	1.88813	2.26586	2.00429	1.68383	1.64186	1.29439	0.961022	2.17684	1.78144	1.34387	2.92682	2.72074	1.18702	3.02321	2.40501	1.82565	1.69725	1.42569	1.49207	2.21402	1.11108	1.26094
Ppan	3.47369	2.34765	3.65047	3.42605	2.84175	3.29774	2.5492	2.88025	1.63005	3.80543	2.65936	2.72803	3.57916	3.41296	1.83021	3.16977	3.1907	3.13468	2.45228	3.00375	2.06926	3.13898	2.84107	1.61004
Angptl2	0.195276	0.157669	0.332446	0.158395	0.174657	0.291081	0.188411	0.185	0.206177	0.268763	0.228251	0.173718	0.100317	0.124475	0.109655	0.078687	0.141035	0.1385	0.125747	0.0935212	0.116641	0.173066	0.167285	0.0755461
Cacna1e	0.0146824	0.0173482	0.0258458	0.0114931	0.0360173	0.0315433	0.127858	0.132075	0.0452646	0.238662	0.19365	0.140171	0.395677	0.400944	0.210719	0.468797	0.561287	0.40765	0.0486269	0.0636884	0.033551	0.0453493	0.0700905	0.0530525
Cacna1b	0.016417	0.0109658	0.0269138	0.0130651	0.0236407	0.0143113	0.140109	0.147613	0.0838237	0.168474	0.127714	0.0941023	0.284701	0.28366	0.172302	0.341761	0.370366	0.283851	0.0224888	0.0656243	0.0310925	0.0308503	0.0523248	0.0345928
Trmt10a	1.0743	0.690798	1.06504	0.81452	0.807307	0.922267	0.634511	0.588656	0.577177	0.878432	0.580519	0.887762	0.606577	0.675732	0.427839	0.883611	0.461342	0.551171	0.372694	0.37284	0.21996	0.388641	0.365267	0.24126
Etv1	0.585733	0.507549	0.556044	0.547122	0.471314	0.498285	0.257755	0.300567	0.299661	0.327622	0.294209	0.27528	0.557572	0.533605	0.442295	0.628694	0.531386	0.731122	0.144152	0.118783	0.128475	0.134387	0.130214	0.149473
Kifc2	1.31134	1.52606	1.08659	1.49735	1.96959	1.42376	0.987924	1.48001	1.14238	1.83623	2.50787	1.55358	4.42273	7.01653	2.99826	6.22934	9.49568	5.14357	2.37054	3.71612	3.12068	2.81113	4.09191	2.78018
Psap	38.196	38.8781	44.6949	41.261	44.7418	53.2244	11.4205	11.125	9.39239	11.0182	11.4525	11.787	14.5793	14.5647	11.3733	13.5587	14.7815	13.6302	30.0373	30.3184	36.8182	31.8092	32.2315	27.3304
Ikbkg	1.10088	0.913162	1.22087	0.957319	0.787019	1.18078	0.68817	0.707943	0.679868	0.711154	0.629848	0.75233	0.548403	0.488528	0.529503	0.514957	0.407041	0.464044	0.389878	0.406231	0.466797	0.453513	0.403082	0.344994
Pax2	0.00145244	0	0	0	0	0	0.000751258	0.00110081	0	0	0	0	0	0.00102432	0.0023562	0.00144923	0.00335681	0	0	0	0	0.000984371	0	0
Wars2	0.195015	0.18732	0.200561	0.175442	0.175539	0.191648	0.0745554	0.0651802	0.0665024	0.0740802	0.0891218	0.0621733	0.0746703	0.108489	0.0766336	0.0809759	0.0706857	0.0727035	0.0919355	0.0518466	0.0954327	0.0681364	0.113911	0.0815779
Atn1	0.272041	0.321238	0.376296	0.358575	0.41258	0.495911	0.37376	0.534782	0.348717	0.625021	0.657226	0.533329	0.762813	0.67149	0.473492	0.975485	0.884146	0.774621	0.540867	0.846855	0.88232	0.916094	0.694284	0.535372
Phb2	11.9775	10.3641	10.9792	12.0739	11.5459	11.5059	11.4978	11.2643	6.24195	14.6473	12.1403	12.5358	14.3263	15.8586	7.11747	15.2922	12.8438	11.5675	13.2252	13.3507	12.6252	15.5368	12.7067	7.23199
Ptpn6	13.7942	10.8996	10.9337	12.6219	12.728	9.05031	0.0921729	0.0700313	0.0999624	0.111649	0.144277	0.200755	0.0768532	0.0465466	0.0535343	0.0856114	0.0648285	0.11455	0.0736685	0.0359553	0.0600002	0.0357848	0.0272231	0.0230913
Eno2	0.7289	0.440896	0.546842	0.530921	1.02427	0.760157	1.7381	2.20975	1.0681	2.90976	4.99284	3.33505	5.82194	7.44067	2.34485	5.99088	10.7072	4.15435	1.68232	1.73063	1.04823	1.56573	2.68034	1.48039
Emg1	7.07829	6.29929	6.04279	6.64988	6.25591	6.00825	4.01056	3.07189	1.96469	4.68177	4.13407	3.164	6.38731	5.9965	2.80316	5.93438	4.66672	4.74705	7.70391	6.75436	6.26342	7.93229	6.31157	4.12312
Lpcat3	2.99481	3.26504	3.46218	3.42079	4.22891	3.74686	1.10793	1.13816	0.746549	1.33761	1.21554	1.14449	1.26855	1.12589	0.891227	1.14313	1.00703	1.23548	2.98699	2.77091	3.23023	2.62711	3.14321	2.18245
Atp6v1f	6.67827	7.1735	5.09061	8.02293	7.79876	5.71045	4.0703	3.77194	2.36224	3.81923	5.19353	3.09984	5.85631	6.17973	3.33521	4.54137	6.51296	3.44522	9.02091	7.31598	5.60706	7.75489	6.87763	3.38568
Il12b	0.00850735	0.0119062	0	0	0	0.00679816	0	0	0	0	0	0	0	0	0	0	0	0	0	0	0	0	0	0
Clcn5	0.84282	0.7656	0.929183	0.813002	0.752954	0.722253	0.250274	0.247023	0.262767	0.19571	0.164588	0.154221	0.271929	0.239985	0.269801	0.257158	0.202421	0.204549	0.0705151	0.0748665	0.0505792	0.111906	0.0686978	0.0872813
Clcn3	1.32196	1.2604	1.48578	1.13119	1.10422	1.39503	3.08075	3.16637	3.4738	2.97272	2.80453	3.42729	2.21515	2.23362	2.24853	2.2396	1.9326	2.30805	1.37729	1.67578	1.60039	1.66262	1.51141	1.67808
Hif3a	1.85652	1.75098	1.91246	2.74387	1.45347	2.56776	0.0417504	0.0233054	0.0703437	0.057519	0.0471348	0.0949932	0.179029	0.0948763	0.103923	0.184091	0.26206	0.208472	4.26881	3.79901	4.17272	4.23055	4.48669	3.80236
Gpx6	0	0	0	0	0	0	0.0163948	0	0	0	0	0.020086	0.0108555	0	0	0.0158134	0.0457852	0	0	0	0.0120063	0	0	0
Gpx5	0	0	0	0	0	0	0	0	0	0	0	0	0	0	0	0	0	0	0	0	0	0	0	0
Pde1c	0.00591502	0.000856366	0.00250785	0.00064929	0.00206225	0.00162988	0.0276407	0.0267436	0.0200798	0.0487031	0.0322982	0.0245578	0.0373021	0.0408522	0.0255881	0.0425347	0.0354726	0.0486751	0.00933415	0.00428586	0.00679881	0.0116117	0.0111051	0.00731445
Utp20	0.721708	0.669908	0.881905	0.724138	0.754174	0.885791	0.53273	0.434669	0.392788	0.508131	0.433778	0.374699	0.396892	0.372067	0.314932	0.428815	0.325375	0.359015	0.234884	0.426727	0.199836	0.284236	0.196823	0.238501
Spic	0	0.0243576	0.0190216	0.0184677	0.0938506	0.0463586	0.00600141	0	0	0	0	0	0.00794743	0	0.00627415	0	0.00670396	0	0	0	0	0	0	0
9330159F19Rik	0.117775	0.117116	0.127026	0.0739967	0.171308	0.113927	1.61272	1.60673	1.91678	1.70195	1.55332	1.70085	2.16538	2.78033	2.04466	2.35648	2.28502	2.62235	2.03414	2.33969	2.6626	2.81892	2.71527	3.25306
Cul3	3.04681	2.33347	3.33553	2.64131	1.98903	2.40955	1.98028	2.19117	2.49153	2.58717	2.09913	3.01621	1.49975	1.40328	1.58375	1.72956	1.23329	1.7108	0.728612	0.716123	0.855584	1.02767	0.679932	1.01534
Sst	1.71621	1.86146	1.8288	1.22923	3.93316	2.19426	2.21922	3.51196	1.02889	8.37461	5.62742	4.02392	34.737	38.1864	11.9252	72.6922	86.1209	34.8128	9.09907	11.9539	5.85067	15.8186	18.9712	7.88079
Il11	0	0	0	0	0	0	0.0117247	0.0343602	0.100135	0.044245	0.0181286	0.0502754	0.0232898	0.00799317	0.0122575	0.0113089	0.0196458	0.0491776	0.037952	0.15877	0.0257587	0.0076814	0	0
Large1	0.16495	0.164034	0.18564	0.140398	0.185654	0.179036	0.365796	0.383071	0.255365	0.42254	0.387878	0.516625	0.285933	0.271383	0.183399	0.297265	0.2863	0.311927	0.0782725	0.0798028	0.0858686	0.086833	0.0951414	0.0709801
Ddx56	1.97341	2.06668	1.65061	1.79486	1.95455	1.74858	3.15243	2.71661	1.55034	2.7688	2.98469	2.26287	3.26431	3.24738	1.39378	2.8933	2.45882	2.04841	3.10172	2.90443	2.05435	2.85686	2.28132	1.74955
Tmed4	14.9451	18.1444	17.2285	15.2139	17.3887	18.0403	26.837	25.4356	18.0462	29.2913	29.7893	20.9322	35.0871	34.3757	23.5162	29.6133	31.0924	28.6996	29.7965	27.9471	28.8849	31.9254	28.2296	22.6102
Col26a1	0.00252063	0.000587946	0.000688716	0.00133733	0.00113269	0.00402843	0.0330287	0.0216512	0.00318138	0.0497464	0.0344938	0.0133108	0.178983	0.140435	0.0395274	0.186953	0.144668	0.119699	0.0243834	0.00653888	0.0114573	0.0130971	0.00346558	0.00367449
Bid	1.93128	1.6918	1.93876	1.6698	1.67785	2.03483	0.143057	0.10481	0.0361117	0.242001	0.180514	0.151091	0.235172	0.218596	0.0979863	0.352096	0.223174	0.248289	0.0798388	0.12989	0.24204	0.187447	0.114079	0.133469
Ralb	3.08758	2.50539	2.58737	2.85484	2.99402	2.20291	0.463419	0.446603	0.271829	0.526879	0.510761	0.419265	0.875684	0.524931	0.327955	0.677353	0.587354	0.650408	0.646177	0.65704	0.493394	0.728658	0.463357	0.42498
Ppp1cc	0.510496	0.499137	0.750919	0.53427	0.405378	0.458227	0.48469	0.402808	0.375115	0.500489	0.458604	0.292476	0.502947	0.384683	0.325207	0.390748	0.31112	0.318599	0.22636	0.195924	0.317865	0.327023	0.19614	0.159031
Dnajb11	6.15266	5.74815	6.246	5.4738	6.05535	5.39163	10.512	10.1448	6.75005	8.44623	8.36674	7.51086	7.84204	7.22031	5.41229	6.39485	4.99518	5.14359	5.41846	5.11512	3.81397	4.83896	4.34209	3.27755
Tbccd1	0.687074	0.645415	0.769183	0.665939	0.699188	0.751986	1.09794	1.21168	0.956598	1.00364	1.06476	1.05544	0.675709	0.673095	0.745953	0.581521	0.62405	0.634131	0.41478	0.372425	0.589366	0.632346	0.529297	0.392843
Clec11a	0.0563927	0.0197307	0.0462248	0	0.0950288	0.0225315	0.291684	0.170961	0.284701	0.311871	0.405901	0.464562	0.366953	0.477246	0.274446	0.168804	0.570203	0.489372	0.377665	0.24138	0.61946	0.477741	0.651283	0.271285
Zfp324	0.934026	0.97049	0.823617	0.664488	1.17331	1.00647	1.14922	1.25492	0.669811	1.13254	1.35061	0.869888	1.75451	1.72663	0.788213	1.03081	1.54541	1.36114	0.900372	1.01325	0.868404	0.920758	1.03902	0.594149
Gab2	0.945617	0.844965	0.932798	1.1386	0.881921	1.12698	0.178448	0.168376	0.130632	0.363909	0.183107	0.254399	0.257436	0.224877	0.150942	0.316074	0.239809	0.295231	0.137112	0.186319	0.165133	0.199455	0.130227	0.144021
Coro1c	1.21855	0.922913	1.08403	1.2835	1.19097	1.33458	1.20958	1.10689	0.8538	1.24636	1.29842	1.12307	1.0114	1.04515	0.722875	0.881493	1.09544	1.02116	0.73806	0.527158	0.690992	0.846497	0.421305	0.434163
Tax1bp1	5.45726	4.63395	5.45572	5.00449	3.8944	4.35906	2.95595	3.19375	3.28697	3.74013	3.11626	3.86422	2.78354	2.87388	2.15993	2.96401	2.36356	2.66014	1.34778	1.52379	1.36451	1.96012	1.63738	1.74196
Psg17	0	0	0.0508051	0	0	0	0	0	0	0	0	0.00981911	0	0	0.0167578	0	0	0	0	0	0	0	0	0
Psg19	0	0	0	0	0	0	0	0	0	0	0	0	0	0	0	0	0	0	0	0	0	0	0	0
Ctse	0.0543136	0.0827201	0.167607	0.0940765	0.0990625	0.222114	0	0	0.00403242	0.0020787	0.00170342	0	0	0.0202787	0.0103658	0.00637571	0.0258437	0.0161731	0	0	0	0.0021653	0	0.00558893
Ndrg2	6.1383	5.21244	4.19843	6.21539	7.89645	5.8241	21.2356	19.9469	7.0891	33.2812	26.6454	14.8473	79.5736	64.369	29.9094	77.4332	75.4683	64.0702	786.585	753.928	625.141	684.41	761.527	550.38
Mettl17	1.3629	1.36968	1.27166	1.06156	1.26072	1.2397	1.2074	1.24174	0.93328	1.53764	1.1982	1.17604	1.60885	1.50311	0.885943	1.57689	0.92988	1.36306	1.22993	1.12837	1.2961	1.62136	1.04057	0.659445
Arhgef40	6.08258	5.99443	6.06719	5.85101	6.2876	6.20138	1.09344	1.08766	0.5817	1.87101	1.41257	0.97586	3.27029	3.39049	1.364	3.30994	2.92126	3.01362	3.03113	2.63749	3.51661	3.28069	3.26015	2.37043
Pnpla6	0.757123	0.863813	0.887067	0.605815	1.03454	1.04233	2.0283	1.88677	1.91638	1.74553	1.88892	1.49149	1.54452	1.81661	2.03815	1.43289	1.74031	1.57115	1.41459	1.12081	1.6272	2.12502	1.57162	1.1301
Mcoln1	4.51259	3.77127	5.42645	3.91133	4.6683	6.38277	3.62802	3.63349	3.59396	3.02499	3.00638	3.31834	2.60057	3.16545	3.197	2.43992	2.90477	2.64091	2.1548	1.90932	2.07797	2.14792	2.2362	1.68151
Arhgef18	0.243026	0.315135	0.354985	0.26307	0.34315	0.375515	0.265106	0.219108	0.159181	0.238303	0.249321	0.17152	0.286378	0.2843	0.176258	0.222952	0.290151	0.238216	0.307256	0.315521	0.384796	0.323169	0.303095	0.264951
Pkn2	0.541391	0.523079	0.770993	0.532599	0.4766	0.578566	0.458166	0.466681	0.518656	0.432878	0.4528	0.422436	0.420869	0.416773	0.346366	0.369675	0.354265	0.412268	0.313064	0.295442	0.296487	0.341279	0.305632	0.296671
Cd33	76.7112	72.6316	78.8673	77.0951	60.942	78.8819	0.304138	0.311957	0.782961	0.512647	0.504743	1.44947	0.281931	0.207343	0.15898	0.176012	0.200448	0.871706	0.177206	0.22423	0.142545	0.115568	0.242532	0.164578
Etfb	0.927076	0.951878	0.681797	0.841224	0.79426	0.64389	0.784259	0.577869	0.295258	0.817395	0.863846	0.60395	1.10384	0.91656	0.402922	0.890446	0.846031	0.563909	2.34034	1.62504	1.18804	1.744	1.88692	1.0837
Nkg7	0.505305	0.49503	0.165678	0.241282	0.476841	0.161514	0	0	0	0	0	0	0	0	0	0	0	0	0	0.0786501	0.0765606	0	0	0
Stxbp2	9.19761	7.49134	10.1496	8.29619	8.3651	8.21793	3.87079	3.96817	4.26753	2.62038	3.45068	2.97357	0.801931	0.82568	2.26393	0.457929	0.892926	1.00922	0.407718	0.262411	0.326395	0.291998	0.146803	0.139268
Pcp2	0.109336	0.0382544	0.179244	0.174025	0.147395	0.305792	0.113105	0.207165	0.137996	0.106705	0.204029	0.173212	0.0374451	0.231324	0.177367	0	0.189518	0.158134	0	0.0425448	0.0414146	0.0370502	0.811749	0.0956315
Sgce	2.08963	2.21448	2.42554	1.8694	2.17269	2.17166	1.52295	1.49101	1.26517	1.41476	1.55333	1.25905	1.66259	1.44033	1.48808	1.38349	1.2658	1.34834	0.708274	0.679186	0.590703	0.739614	0.717241	0.576422
Chn2	0.281421	0.266376	0.252968	0.213865	0.252006	0.262543	1.43804	1.52086	1.31267	1.92329	1.9385	2.09923	0.289918	0.378723	0.531026	0.267686	0.435699	0.536802	0.0475473	0.0613663	0.0429138	0.0221135	0.0302809	0.0214042
Wwox	0.0178326	0.0155755	0.0260338	0.0160563	0.0188636	0.0231951	0.0138692	0.0162777	0.0104322	0.0199866	0.0170029	0.0122902	0.022646	0.0194612	0.0152034	0.0293523	0.0256459	0.019485	0.0210666	0.0173223	0.0237648	0.0198489	0.0216902	0.0183299
Slbp	1.36234	1.28367	1.34337	1.15934	1.14559	1.07247	0.408142	0.342472	0.221317	0.500234	0.341603	0.376093	0.716029	0.632595	0.262579	0.868089	0.713107	0.414562	0.986141	0.6036	0.623329	1.01472	0.567484	0.672481
Tyr	0	0	0	0	0	0	0	0	0	0	0	0.0010956	0	0	0	0	0	0	0	0	0	0	0	0
Ghrhr	0	0	0	0	0	0	0	0	0	0	0	0	0	0	0	0	0	0.0070246	0	0	0	0.0131667	0	0.00849623
Aqp1	0	0	0	0	0	0	0.0253537	0	0	0.00637842	0.0313614	0.049699	0.00671497	0.0553107	0	0.00978182	0	0.014179	0.0437696	0.129702	0.371341	0.305631	0.404361	0.497334
Arid3b	1.90402	1.72455	2.17116	1.98167	1.66808	2.30882	0.307098	0.238572	0.331077	0.144861	0.222407	0.205958	0.0964106	0.113704	0.294761	0.0357491	0.144908	0.10734	0.059986	0.153357	0.126018	0.150896	0.118224	0.105205
Cnn2	1.00126	1.0454	0.807699	1.40394	1.19982	0.800097	0.205511	0.192726	0.110325	0.485999	0.440628	0.543846	0.130632	0.336252	0.0687522	0.158578	0.238752	0.229864	0.141915	0.272109	0.0842802	0.0969409	0.183549	0.194613
Polr2e	7.66361	7.93592	7.32035	9.61564	10.0605	5.45721	6.76101	6.2767	4.13422	6.41364	7.41407	4.81719	10.8583	11.6375	4.09392	9.55833	8.46307	6.7264	11.2443	10.293	9.38745	8.92176	8.53974	4.78403
Abca13	0.00651793	0.00658811	0.00593635	0.00576351	0.00536972	0.00540133	0.000249727	0	0.000304686	0.000314129	0.000514836	0.000917855	0.000165352	0	0.000130538	0.000240871	0	0.000349149	0	0	0.000182881	0.000490825	0	0.000211147
Myo9b	2.11092	2.33432	2.78533	2.41188	2.86212	3.20744	1.68143	1.64696	1.47106	1.35673	1.38254	1.38816	1.24052	1.02676	1.40219	0.955429	0.93172	1.23451	0.574342	0.607514	0.631277	0.658114	0.557059	0.511494
Hdac9	0.0754489	0.0773771	0.0751776	0.070487	0.0714936	0.0648779	0.0134325	0.0185431	0.0164749	0.0157405	0.0217167	0.012126	0.0250906	0.0271832	0.015669	0.0256396	0.0339586	0.0213502	0.0225792	0.0287206	0.028993	0.0322368	0.0341645	0.0285727
Ly9	0.379584	0.416135	0.4719	0.604168	0.609796	0.707753	0	0	0.00798477	0.00411613	0.00337302	0.0120269	0	0	0	0	0	0.004575	0	0	0	0	0	0.00553345
Cd244a	0.0305624	0.0296119	0.0558849	0.0336772	0.0396165	0.0131504	0	0	0.00296722	0	0	0.00148978	0	0	0	0	0	0	0	0	0	0	0	0
Adgre1	5.14763	5.98509	5.67176	5.6324	6.11427	5.49573	0.0216667	0.0259758	0.0540716	0.0495534	0.0527895	0.116435	0.019563	0.0181281	0.0123553	0.0180486	0.0115515	0.0750434	0.011689	0.0348229	0.0165883	0.0122592	0.0141365	0.00999244
Mtfp1	0.35969	0.188773	0.417685	0.310107	0.525307	0.574852	0.496121	0.545223	0.189158	0.585061	0.783081	0.189943	2.23788	2.11391	0.259334	1.67484	2.63244	0.888723	3.84749	2.77594	1.2035	2.0924	3.16501	1.15356
Rab23	0.251563	0.282388	0.23198	0.296131	0.374458	0.255465	2.5644	2.85197	2.26554	3.10298	2.73	2.50079	2.33695	2.16222	2.00362	2.38456	2.13482	2.22473	1.39809	1.66003	1.46902	1.83635	1.69044	1.6319
Rab11a	3.11685	3.57337	2.94959	2.76264	2.51467	2.63442	2.53455	2.81949	1.93021	3.39821	3.84273	3.61825	3.42528	3.75437	1.72834	2.50803	2.98108	2.63666	1.51207	1.87382	1.61958	1.12255	1.24849	0.884043
Eif2b2	3.19277	2.65309	3.01239	3.81136	2.40989	2.41844	4.95427	5.31856	3.38958	4.52247	4.47735	4.53119	5.92289	5.93411	3.74968	4.99428	4.61186	3.55954	6.47776	4.14126	5.39179	6.29996	6.5434	3.82527
Dlst	5.01386	4.78999	6.21141	5.60515	4.91091	6.32028	3.85803	3.98009	2.75803	4.34417	3.95573	3.45951	4.9497	4.98109	2.96815	4.37557	3.92932	3.9408	4.55773	4.64157	4.36078	5.32687	4.86287	3.78367
Pgf	0	0.0074554	0.0261996	0.0169579	0.0430888	0	0.0495968	0.0484493	0.0134471	0.0762511	0.0113609	0.0135029	0.102167	0.225414	0.0115224	0.0850453	0.141585	0.0847518	0.78487	0.762825	0.322852	0.577658	0.536129	0.270246
Ulk2	4.89612	4.61772	4.17401	4.73127	4.76678	4.11932	1.85677	1.9121	1.92545	2.10001	2.06714	2.35636	1.55792	1.86789	1.57542	1.76928	1.82514	1.84393	0.875191	1.11912	1.03838	1.20581	0.920865	1.00648
Ccl24	3.89539	7.2422	2.9426	5.106	4.81376	3.1433	0	0.057889	0.0723017	0.0248476	0.0814468	0	0.0261586	0	0	0	0	0.0828528	0	0	0	0	0	0
Dgkq	0.170676	0.199055	0.267087	0.172874	0.254492	0.239709	0.243439	0.254793	0.25132	0.282665	0.33642	0.226144	0.364889	0.291802	0.237722	0.330277	0.233089	0.246853	0.155868	0.386408	0.239007	0.241862	0.238927	0.162855
Tmed11	0	0	0	0	0	0	0	0	0	0	0	0	0	0	0	0	0	0	0	0	0	0	0	0
Grap	3.04441	2.07071	1.95646	2.43737	2.364	2.17489	0.0409418	0.0415328	0.00384246	0.0435771	0.0129854	0.0810269	0.0208529	0.0343527	0.0362174	0.0425275	0.0211083	0.0396288	0.033981	0.0284315	0.0369016	0.0082532	0.0452058	0.0213026
Pou1f1	0	0	0	0	0	0.00655239	0	0	0	0	0	0	0	0	0	0	0	0	0	0	0	0	0	0
Chmp2b	1.37492	1.526	1.45315	1.32266	1.09311	1.16308	1.11754	0.946634	0.988444	1.11411	1.08751	0.954253	1.44887	1.50243	0.947733	1.50254	1.05049	0.939659	0.781381	0.776062	0.541784	1.05812	0.776918	0.72684
Plod3	13.9472	15.8747	13.6987	12.4944	18.2033	12.2695	9.12287	9.13943	7.01795	6.64122	7.88369	6.58565	7.65951	7.14646	8.47627	5.87445	5.74795	6.06058	6.03415	4.02475	4.67521	5.60459	4.67348	3.21711
Ap1s1	0.682665	0.41799	0.262302	0.687595	0.496099	0.272756	1.73791	1.58452	1.01644	1.17286	1.46158	0.790843	1.86308	2.17402	1.14205	2.23504	1.97834	1.53503	1.71444	1.21198	0.880798	1.6627	1.44308	0.5971
Mapk13	0.0108676	0.0076047	0.00890809	0.0345949	0	0.00868419	0	0	0	0.00707074	0	0	0	0	0	0.0216871	0	0	0.0727806	0.0592033	0.123494	0.0441919	0	0.0190109
Srpk1	2.0813	2.4408	2.19784	2.03403	2.30313	2.01528	5.16698	6.25576	4.07295	4.92258	6.13939	4.42282	2.85585	3.52373	2.00528	3.0677	3.34912	2.55919	1.60801	1.90467	1.44833	1.92517	1.87352	1.09404
Pax3	0	0	0	0	0	0	0.00192368	0.00563752	0.00156469	0.00161319	0.00594877	0.00235678	0.00679321	0.00612009	0.0020111	0.00618487	0.0107444	0.00358605	0.0166049	0.014472	0.00845252	0.00756177	0.00818144	0.00433732
Lbr	1.25234	1.27849	1.8105	1.28335	1.16503	1.15153	0.77642	0.799629	0.776778	0.767368	0.734018	0.674011	1.1075	1.01024	0.8233	1.21106	0.820228	0.725754	0.272864	0.287047	0.373644	0.459256	0.297191	0.255086
Crabp2	0.0504661	0.141257	0.103417	0.0200812	0	0.0201635	0.0391544	0.0573728	0.0636951	0.0328346	0.0403603	0.0639597	0.0864178	0.0711817	0.0409338	0.0503546	0.0583174	0.0547427	0.197152	0.137462	0.0191158	0.0855065	0	0.0882814
Nes	2.65008	1.76569	2.03714	3.64283	3.19651	2.23924	0.714872	0.557385	0.272062	1.38597	0.655763	0.634769	3.08322	2.29818	1.17932	3.68166	1.8169	2.02647	2.78812	2.23016	2.37264	4.09911	1.70497	1.94084
Bcan	0.280765	0.412583	0.475626	0.56605	0.586673	0.553414	62.2905	64.5401	36.5821	76.1139	70.8104	57.4259	83.8159	78.9718	35.005	88.731	79.3862	80.1526	127.871	118.953	131.781	126.38	132.714	94.9225
Hapln2	0	0	0.0167013	0.0162151	0.0137338	0.0162815	4.80566	6.79464	8.24201	1.28589	4.97539	2.98255	1.03275	2.41405	5.32154	0.46759	1.08307	1.03141	0.0682264	0.142711	0.200662	0.0276177	0.134464	0.071285
Prcc	0.5652	0.669556	0.507067	0.598556	0.782944	0.451647	0.74812	0.637492	0.379147	0.781798	0.908782	0.682481	1.10045	1.16128	0.572752	1.25224	1.11855	0.836771	0.923939	0.727333	0.623723	0.865644	0.72324	0.572209
Rrnad1	3.00194	3.18683	4.30919	2.21423	2.74401	3.42857	2.36316	2.68583	2.12546	2.08653	2.26417	1.69815	1.68508	1.99317	1.55993	1.97252	2.10676	1.73671	1.55276	2.23368	1.38669	1.59784	2.01736	1.2552
Hdgf	4.44574	3.48393	3.25689	4.37677	3.36408	4.08495	6.20928	6.17885	4.70142	7.26676	7.46618	6.30995	9.84069	9.17529	5.96743	9.11355	7.77606	7.29722	15.3329	12.5668	14.5271	16.3377	12.1315	11.8033
Slc25a18	0.0858809	0.140224	0.154872	0.168588	0.196819	0.155554	0.100687	0.121501	0.0469705	0.156454	0.109893	0.0616781	0.533344	0.516837	0.247678	0.691241	0.757546	0.455442	16.0722	16.7447	12.9991	16.2623	16.8519	11.623
Thop1	0.208771	0.312101	0.16335	0.302084	0.543699	0.288156	1.13383	1.21548	0.658744	1.10518	1.52292	0.78175	1.57949	1.70658	1.01602	1.42976	1.84228	1.08428	1.39815	1.07824	1.25089	1.89727	1.0255	0.813417
Apba3	0.794083	0.754121	0.697399	0.73728	1.1852	0.830952	1.37888	1.63356	0.787475	1.39004	1.81448	1.28197	1.9555	2.7601	1.49266	1.79217	2.51254	1.55868	3.39762	3.01638	2.95057	2.52431	3.94598	1.28988
Matk	4.66047	3.26919	3.8295	4.52509	4.18596	3.35993	0.713151	0.932707	0.409881	1.24551	0.929525	0.85205	2.48978	2.39475	0.640813	2.54679	2.57425	1.74694	0.35612	0.25717	0.233073	0.494249	0.610996	0.269098
Pias4	0.494624	0.522016	0.325682	0.445261	0.541094	0.239742	0.964636	0.67601	0.644752	0.796627	1.0419	0.596047	0.833106	1.05221	0.762933	0.695798	1.10099	0.592246	0.814555	0.530079	0.546711	0.555043	0.702349	0.411352
Map2k1	1.78812	1.85054	1.47576	1.745	1.7247	1.31411	1.0354	1.20125	1.08974	0.740656	1.0318	1.15087	1.05564	1.02515	1.27375	0.858007	1.05238	0.857421	0.834701	0.955442	0.80269	0.898516	0.82061	0.715364
Sgta	1.56437	2.11191	1.33674	1.99665	2.80527	1.24418	3.02286	3.18781	1.70436	3.61519	3.6943	2.49234	5.08974	5.56833	2.44599	5.58835	5.10773	3.77808	6.42436	5.12826	4.88022	5.1711	5.04024	2.96248
Nmrk2	0	0	0	0	0	0	0.0791967	0	0.0773007	0	0.0489814	0.135838	0.0419508	0.0863864	0.0662367	0.0611105	0.0176936	0.0221453	0.0341806	0	0	0	0	0
Tmem242	0.202198	0.14715	0.155796	0.286428	0.190808	0.180963	0.343036	0.422961	0.321553	0.478861	0.388098	0.448457	0.573376	0.578949	0.30833	0.536657	0.436934	0.365553	0.839559	0.802531	0.539188	0.748217	0.660525	0.413839
Dtx2	0.458884	0.491493	0.465703	0.397489	0.462913	0.336756	0.292249	0.326497	0.191088	0.402145	0.421084	0.152318	0.613664	0.583404	0.243074	0.591804	0.701621	0.480839	0.209059	0.352264	0.399663	0.444287	0.388848	0.259387
Zp3	0	0	0	0.0110947	0	0	0	0	0	0	0	0	0	0	0.0150771	0	0	0.0403266	0	0	0.0422453	0.0188967	0.0460018	0.0609686
Hspb1	0	0.354109	0.296286	0	0.341098	0.173303	0.074784	0	0.045621	0.047035	0.0385436	0	0.0990335	0.101966	0.0781826	0.072132	0.0835386	0.0522786	0.161381	0.225043	0.27383	0.244973	0.119272	0
Rasa4	2.18182	2.05055	2.32879	2.01729	2.18735	2.4096	0.0197986	0.0128937	0.0295237	0.0249045	0.0181407	0.0269513	0.0203922	0.0179967	0.00459964	0.0339493	0.0393179	0.0276809	0.0522188	0.043029	0.0257759	0.0403543	0.0385934	0.0297599
Syt5	0.152839	0.224597	0.212978	0.206778	0.381178	0.195412	0.252973	0.451767	0.135033	0.686145	0.684505	0.406781	2.38689	2.52225	0.876056	3.88878	6.07562	2.54213	0.938274	0.939674	0.798924	1.0462	1.34908	0.842199
Hnrnpa2b1	36.4818	30.9294	35.7521	32.2522	26.28	24.3095	32.8146	38.5549	27.5668	38.3004	34.1151	34.5722	26.8142	31.0594	14.9945	27.7607	21.9752	18.528	16.1785	25.0685	14.2558	20.4828	17.6019	11.9703
Fxyd4	0.172535	0.0603666	0.0707129	0.0686541	0	0.137871	0.0148736	0.0217942	0	0.0374186	0.0459949	0.072889	0.0984824	0.141959	0.062198	0	0.0166147	0.145565	0.064193	0.179032	0.0871379	0.0974439	0.237216	0.0503031
Ccdc130	0.783819	0.845858	1.21532	0.789127	1.17124	1.01121	1.12345	0.980558	0.601915	0.940073	1.16309	0.760008	0.957332	0.945723	0.648534	1.13073	1.08037	0.799021	0.906501	1.05097	0.972968	1.10724	0.817984	0.883814
Mri1	1.29739	1.05357	1.27354	1.19822	1.01486	1.21593	1.69008	1.59028	0.636801	1.58403	1.40907	0.913495	1.87606	2.03328	0.727541	1.61416	1.23085	1.38996	1.55539	1.39611	1.32262	1.49805	1.17597	1.14879
Prkacb	2.58024	2.4197	2.3988	2.47296	2.12719	1.9127	1.90867	2.11647	2.5571	1.88735	1.75248	1.88336	2.1948	2.10204	2.21344	2.36698	2.32392	1.98029	0.890557	1.05337	0.978973	1.07472	1.03547	1.04181
Sgsh	1.22665	1.14677	1.27093	1.39012	1.36261	1.4115	1.59379	1.56931	1.36242	1.47488	1.15106	1.15043	0.967914	0.878927	1.21517	0.851862	0.890181	0.950934	0.94198	0.924085	0.929272	1.19713	0.955237	1.10724
Chd5	0.112984	0.095197	0.105843	0.110101	0.158531	0.117923	0.457975	0.445632	0.18771	0.801115	0.587641	0.398897	1.562	1.64241	0.784266	1.52306	1.67865	1.27561	0.404067	0.323005	0.288222	0.367238	0.315753	0.21378
Cstb	20.812	21.5045	15.9122	26.9751	27.0312	22.1257	23.8902	20.2935	20.2	13.3825	20.5054	17.7002	24.5509	28.883	33.4	11.8403	17.4748	19.6712	20.445	18.7542	15.8587	17.4044	18.1223	11.5502
Sh2b2	1.43074	1.42273	1.2825	1.66799	1.49734	1.86872	0.153632	0.129997	0.0765612	0.225915	0.111524	0.143155	0.335262	0.410098	0.149304	0.333936	0.345652	0.360012	0.373557	0.182322	0.244032	0.368585	0.369264	0.354933
Pex5	1.08748	0.961472	1.22768	1.07274	1.00076	0.973067	1.19907	1.24371	0.838321	1.05072	1.14573	1.07289	1.52543	1.49713	0.985947	1.39045	1.34696	1.27146	1.25016	1.24161	1.1001	1.28868	1.20329	0.729044
Jkamp	1.22801	1.07415	1.35031	1.17394	1.28199	1.07703	2.28895	2.05439	1.71531	1.86591	2.39138	2.10203	2.13874	2.09647	1.53053	2.09944	1.59644	1.72195	2.18974	2.15031	1.80388	2.01469	1.99517	1.68318
Cd44	0.153608	0.158018	0.147435	0.221505	0.132743	0.155269	0.00679074	0.0119405	0.0082852	0.017084	0.0650988	0.0640611	0.023381	0.0175921	0.0149086	0.0235797	0.0568927	0.0294323	0.28429	0.315719	0.336175	0.324772	0.215525	0.259522
Slc1a2	1.04433	1.10215	0.889949	1.00363	1.37755	1.2816	2.03784	2.04182	1.14836	3.02455	2.09436	1.58064	8.81183	8.43905	5.50561	11.5798	13.3434	10.7559	116.333	110.178	157.053	145.662	143.81	191.367
Eif2ak4	0.596873	0.557852	0.785056	0.638805	0.580824	0.814664	0.237754	0.283903	0.245916	0.242825	0.226787	0.2252	0.236841	0.244823	0.182524	0.266972	0.225946	0.250051	0.168468	0.227451	0.187106	0.183197	0.139225	0.116414
Wdr1	6.58415	5.89108	6.64657	7.66626	6.47994	6.18736	5.22401	4.90357	2.80368	6.90043	5.69817	4.6998	8.42273	7.45894	3.40147	8.00924	6.05623	7.10079	3.15897	2.57601	2.98238	3.28091	2.81941	2.60107
Slc2a9	0.0733771	0.0913426	0.107631	0.117406	0.0879864	0.100605	0.023571	0.0210744	0.010236	0.0281422	0.0164725	0.0313252	0.0460277	0.0408542	0.0179596	0.0331394	0.0263304	0.0519463	0.0275879	0.0150277	0.0263312	0.0235564	0.0178407	0.0243209
Ccn4	0.00372785	0.0104344	0.0183342	0.0118669	0	0.0029789	0.00192819	0.00282536	0.00470506	0.00970178	0.00993784	0	0.00255342	0.0262904	0.00403163	0.0260373	0.0193852	0.00269584	0.00832187	0	0	0	0.00307523	0.00326061
Ndrg1	0.0176848	0.0165002	0.0169122	0.0117284	0.0397348	0.0353295	2.78838	3.5452	4.5441	0.721056	2.58667	1.94249	1.08616	1.33451	4.84363	0.12352	0.757839	0.694866	0.233582	0.169745	0.26125	0.0938871	0.0753752	0.0696069
4930550C14Rik	0.0148203	0.0207413	0.0182222	0.0294861	0.0199792	0.00592139	0.0210804	0.0028081	0.0210434	0	0.00987711	0.0117393	0.00761345	0.00522595	0.012021	0.00369689	0.00856298	0.00267936	0.0330841	0.0115338	0.0505233	0.0376658	0.0366772	0
Man2b1	117.074	112.826	131.319	121.681	124.78	131.252	6.085	6.34823	5.82542	8.07664	6.77892	8.57375	7.35318	5.80663	5.53103	6.39847	6.1478	8.54193	4.48899	3.72755	4.76206	4.64117	4.55201	3.67694
Klf5	0.0072712	0.0050881	0.00596016	0	0.0147034	0.0232414	0.0376093	0.0220435	0.00917724	0.0662318	0.0620281	0.0460768	0.174316	0.107687	0.0432504	0.174123	0.218463	0.157747	0.00811593	0.096199	0.0605927	0.073919	0.10197	0.0890376
Wdr83	1.81939	1.27314	1.70883	1.76466	1.43075	1.55987	2.82317	2.64294	2.39199	3.18131	2.71812	2.65413	3.466	3.12758	2.56204	2.83651	2.6609	2.60401	2.05191	2.13864	2.38333	1.9395	1.75102	1.37585
Prdx2	7.4294	7.67141	4.95728	7.31856	8.19872	6.13587	34.1631	31.6388	16.5525	48.2788	49.0066	37.1467	35.4976	34.632	14.2201	33.9912	31.213	27.6331	51.9293	41.2488	34.3188	47.6037	41.1075	25.7154
Polr2a	10.978	11.0538	12.8258	11.6079	12.5756	11.7441	11.8354	9.86295	11.9259	11.5424	10.3123	9.89395	8.29253	6.87471	12.1021	6.9351	7.02293	9.11432	4.90457	4.76351	7.48345	6.05084	4.06649	5.30726
Shbg	0	0	0	0	0	0	0	0.0290472	0.0241861	0	0.0613018	0.0242865	0.0525028	0.216231	0.0414487	0	0	0.0277156	0.256669	0	0	0.0779237	0	0.167609
Senp3	3.21998	3.31028	4.13832	2.90001	3.5102	3.64252	2.7347	3.34431	2.3916	3.3796	3.39118	2.99772	3.68499	3.42031	2.15677	3.01454	3.22327	2.64479	3.15035	3.04218	2.73047	3.17914	2.65626	2.27165
Corin	0	0	0	0	0.00156733	0.00046452	0.00390878	0.00660867	0.00770377	0.00189108	0.00433909	0.0062623	0.000796345	0	0.00377208	0.000580025	0.00335874	0.00168152	0.00194653	0.00361921	0.00440382	0	0.000959083	0
Plekha8	0.46154	0.447565	0.453218	0.389681	0.401115	0.381918	0.32234	0.291207	0.371102	0.297242	0.27106	0.26575	0.271202	0.353586	0.253375	0.236104	0.216586	0.201616	0.143826	0.140394	0.0976175	0.133377	0.162346	0.10041
G6pc2	0	0	0	0	0	0	0	0.00537186	0	0	0	0	0	0	0	0	0	0	0	0	0	0	0	0
Spc25	0.193264	0.0946671	0.0871296	0.153805	0.0651348	0.0694961	0.089967	0.0805617	0.0243925	0.150891	0.0875856	0.0306174	0.430227	0.688304	0.0940556	0.588152	0.284747	0.216629	0.560863	0.278252	0.300142	0.432239	0.199287	0.135232
Dnah2	0.0092632	0.0136123	0.022779	0.0147438	0.00999017	0.0288684	0.0100617	0.0119351	0.00292285	0.0265183	0.016792	0.00821799	0.0374349	0.0568353	0.0200361	0.0757903	0.0401412	0.0341638	0.0651379	0.066323	0.0828066	0.109237	0.0657169	0.0429414
Ripk4	0	0.00380548	0	0	0	0	0.0309416	0.00824337	0.078934	0.0141531	0.0318945	0.0689234	0.0186249	0.0115059	0.105865	0	0.00942647	0.0550583	0.0121401	0.0126969	0.00823971	0.0294855	0	0.00951326
Ufd1	2.65714	2.41186	2.74641	2.5295	2.31642	2.59245	4.88492	4.95219	5.21896	4.82091	4.54423	4.88464	4.14273	3.4052	4.56776	3.31788	3.12901	3.47708	2.5252	2.37514	2.7108	2.86419	2.27547	2.51003
Zfp287	0.177053	0.213521	0.287171	0.16189	0.279312	0.24383	0.828102	0.859383	0.782127	0.747545	0.845571	0.856991	0.732802	0.727937	0.735366	0.778063	0.694327	0.730087	0.353197	0.263854	0.410951	0.416152	0.285898	0.316312
Prlr	0.000691208	0	0	0.00165025	0.00139773	0.00110468	0.00357519	0.00157161	0.00348959	0.000899438	0.00221117	0.0039421	0.00568137	0.00487469	0.00261636	0.00275872	0.00519183	0.00599826	0.000771509	0.0037655	0.00104728	0.00796374	0.0039914	0.00120915
Letm1	1.39938	1.40138	1.50834	1.23424	1.40373	1.50125	2.03892	1.80593	1.535	2.11846	2.02828	1.96556	2.24345	1.88637	1.58788	1.93226	1.77943	1.77095	2.45054	2.31103	2.24963	2.51103	2.11335	1.8962
Ubqln1	2.32297	2.253	2.14091	2.36115	2.37507	1.96447	3.98123	3.64434	3.4693	3.61402	3.6049	3.91464	3.21113	3.14495	2.68474	2.68713	2.45487	2.65038	1.95807	1.92024	1.36089	2.24733	1.70282	1.49754
Fgfr4	0	0	0	0	0.00496987	0	0	0.00558815	0	0	0	0.00934457	0.0101006	0	0.00797396	0	0	0	0.057608	0	0	0.0299822	0.0121647	0.019347
Cadm3	0.113888	0.127994	0.195194	0.120848	0.200058	0.25096	4.70545	4.26875	3.41933	7.12472	6.04823	5.38213	5.86247	5.12824	2.58655	6.40153	7.53746	6.12456	1.74115	1.65985	2.16741	2.28517	1.77936	1.61193
Fcer1a	0.0200418	0	0	0.0159498	0	0	0	0	0	0	0	0	0	0	0	0	0	0	0	0	0	0	0	0
Txn2	1.32819	1.69797	0.997987	1.59907	1.56098	1.04094	2.30318	2.34238	1.1713	2.77528	3.47719	1.51607	3.28328	4.04701	1.81855	3.16872	3.78787	2.93075	7.45999	5.0689	4.89554	5.98376	5.9419	3.51494
Casp14	0	0	0	0	0	0	0	0	0	0	0	0	0	0	0	0	0	0	0	0	0	0	0	0
Slc1a6	0	0.00242683	0.00284277	0.00276	0	0.00277132	0.080722	0.0473126	0.0284517	0.0880008	0.0906042	0.0439538	0.251802	0.229909	0.0693877	0.148798	0.226431	0.175559	0.0193549	0.00269901	0.0236458	0.0305557	0.0314703	0.0121336
Slc1a3	0.969204	0.877877	0.91648	0.91201	0.964782	1.21067	0.729103	0.679326	0.336643	1.16937	0.749077	0.462842	2.70431	2.5952	1.22512	3.44119	3.18256	2.68357	36.5268	42.038	53.0038	43.7597	41.2761	46.9233
Crbn	1.5427	1.33894	2.04386	1.52276	1.39857	1.58634	0.88454	0.870118	1.10939	1.00372	0.790636	0.970015	0.880569	0.885563	0.759838	0.98443	0.901717	1.02914	0.473863	0.563071	0.493754	0.518718	0.508063	0.721739
Il5ra	0	0.00215008	0.00503717	0.00489051	0	0.00245528	0	0	0	0.00999555	0	0	0.00210459	0	0.00498445	0.00919739	0.00532591	0.0133319	0	0	0.00465539	0	0.00506935	0
Msh6	2.91301	2.47446	3.26781	2.8321	2.49488	2.60973	1.90669	2.14519	1.45927	2.09067	1.82131	1.96488	2.28326	2.3297	1.24229	2.16494	1.97807	1.38447	1.26537	1.41397	1.29109	1.60789	1.26964	0.794575
Fbxo11	1.44025	1.33744	1.94361	1.40542	1.17529	1.64595	0.98611	1.03348	0.963308	1.3869	1.09735	1.32347	0.849798	0.904242	0.777942	0.947953	0.805403	1.02421	0.399219	0.490844	0.531028	0.467492	0.432039	0.522327
Mlxipl	5.71543	5.43835	5.83002	4.83328	4.96429	5.29963	0.024086	0.0297205	0.08352	0.0398651	0.0444286	0.0729954	0.0419686	0.0155561	0.0198794	0.0440182	0.0368182	0.0496265	0.265353	0.15259	0.31007	0.214274	0.0930029	0.175782
Tbl2	2.28795	2.83018	2.56509	2.26133	2.75604	2.11727	3.17994	2.69057	1.94687	2.65067	2.43971	1.95963	3.85214	3.34683	2.38658	2.95303	2.64816	2.74869	2.8256	2.82021	3.14785	2.91616	2.64236	2.47888
Bud23	1.61408	1.45515	1.25812	1.53671	1.66867	1.11571	1.63387	1.76368	1.13108	1.88772	1.88481	1.66288	1.93984	2.123	1.07092	2.30214	1.84802	1.66851	1.74633	2.14239	1.53034	2.30192	1.64192	0.996035
Nid1	0.0493091	0.0512004	0.0325955	0.0329124	0.0439584	0.0635525	0.176886	0.300179	0.21481	0.124188	0.262052	0.320531	0.0544752	0.0998375	0.101494	0.101574	0.0992561	0.112727	0.339103	0.482776	0.39524	0.735206	0.519612	0.624671
Mcm5	0.560543	0.555315	0.511101	1.00748	0.45425	0.483156	0.426756	0.377104	0.0755177	0.491737	0.476837	0.187583	2.0621	1.77671	0.412093	1.78475	1.1281	0.81528	1.54659	0.985214	1.01153	1.63911	1.13264	0.732673
Hmox1	7.47062	8.1876	5.59236	8.64654	8.22017	6.50127	1.00572	1.16343	0.721163	1.94202	1.3277	1.35104	2.88565	2.35764	1.25433	3.26755	2.3356	2.42987	1.19938	1.08846	1.8865	1.50274	1.81506	1.8648
Mprip	0.939409	0.877179	1.00063	0.936688	0.955509	0.983424	0.929118	0.969653	0.78605	1.0937	1.00066	0.831522	1.34751	1.19462	0.866522	1.2349	1.33656	1.08839	1.25271	1.2386	1.36911	1.69644	1.30224	1.10946
Cic	6.05133	5.59254	6.15335	7.19335	7.07372	7.39515	5.19106	4.78381	4.62679	5.41031	5.08985	4.32716	5.44345	5.14526	5.01157	5.31627	6.3698	5.88026	3.88111	3.62208	5.95924	4.55485	3.86532	3.06491
Pafah1b3	3.92517	4.64388	3.81449	4.18649	4.00956	3.16891	3.11862	2.20818	1.07254	4.29148	4.05609	2.23091	9.6456	9.73149	1.75052	9.60954	8.88461	4.71137	4.56185	2.96026	2.39113	3.86692	2.53699	1.80508
Il27ra	0.00966634	0.0946979	0.0396173	0.0538493	0.0716716	0.0463458	0.00499979	0.0146523	0	0.00628919	0.0206151	0.00612546	0.0331052	0.00681711	0.0209081	0.0385799	0	0	0	0.00752277	0.00732292	0	0.00797408	0.00845477
Prkaca	1.24169	1.44697	1.21306	1.28664	1.74566	1.30002	2.57162	2.9577	2.29641	3.16227	3.73979	2.2096	4.19004	4.22835	3.1352	3.74718	4.83463	3.51114	3.98813	3.81014	4.45377	3.95007	3.54537	2.89025
Asf1b	0.21844	0.249099	0.205581	0.457138	0.239946	0.142229	0.150647	0.0919761	0.0306335	0.131596	0.0948975	0.0358875	0.520907	0.387986	0.11812	0.411697	0.313193	0.146266	0.243818	0.113333	0.0980643	0.252224	0.113458	0.0990687
Myl10	0	0	0	0	0	0	0	0	0	0	0	0	0	0	0	0	0	0	0	0	0	0	0	0
Ddx39	2.36377	2.35687	2.81904	3.01954	2.66005	1.98615	2.03072	1.78382	0.915505	1.90756	2.0013	1.28575	2.48073	1.87451	0.981958	2.29781	1.71159	1.41593	2.75161	2.07644	1.68312	3.039	1.69888	1.31326
Dnajb1	7.11487	8.44703	6.09414	6.10757	8.49589	4.7911	7.85635	10.6636	4.23772	8.54743	9.95949	4.39042	12.1378	10.618	4.7263	8.98693	9.62285	5.74258	8.50657	6.0763	5.49094	6.032	6.04515	4.07881
Msh4	0.01213	0	0.00397717	0	0.0098115	0	0.00250964	0.00367737	0.00153098	0.00157843	0	0.00461201	0	0.00513277	0.0026237	0	0	0.00526318	0.00270785	0	0.00367573	0.00164419	0	0.0063658
Usp40	1.39398	1.21407	1.4498	1.39715	1.06085	1.28909	0.95651	0.896039	0.856046	1.08859	0.912045	0.93084	0.767444	0.796779	0.601811	0.751532	0.609479	0.628688	0.512367	0.580338	0.620277	0.594275	0.506961	0.496552
Evx1	0	0	0	0	0	0	0	0	0	0.0316908	0	0	0	0	0	0	0	0	0	0	0	0	0	0
Kbtbd4	0.362446	0.519329	0.551748	0.769187	0.884157	0.38617	0.580266	0.811018	0.457456	0.819746	0.598136	0.524979	0.93393	1.16851	0.485309	1.39492	1.19667	0.736395	0.943957	1.0074	0.797582	1.2633	0.697651	1.05672
Celf1	2.61385	2.2895	2.70776	2.11246	2.30258	2.32039	0.801088	0.884643	0.601032	1.0976	0.86901	0.828186	1.13699	1.21834	0.631979	1.24558	1.21601	1.07222	0.541585	0.787966	0.648677	0.924436	0.677856	0.68587
Ndufs3	0.979418	0.766949	0.9653	0.974312	0.998124	0.941038	1.12174	1.08695	0.669586	1.41861	1.16872	0.916193	1.82889	2.11329	0.725067	1.83817	1.54947	1.33223	2.77205	2.26853	2.01394	2.30744	2.86631	1.25439
Por	0.551527	0.641955	0.55951	0.55336	0.690756	0.6269	0.84263	1.10916	0.667385	0.897689	1.04133	0.882394	1.44252	1.41078	0.942933	1.28587	1.41138	1.20969	2.26736	2.3671	2.96748	2.18969	2.47157	2.11428
Igf1r	0.379174	0.30827	0.470373	0.429735	0.365973	0.591449	0.206411	0.229004	0.17706	0.275887	0.25496	0.252614	0.262906	0.239952	0.151488	0.258839	0.288034	0.285833	0.225783	0.196617	0.343674	0.282218	0.241926	0.266873
Insr	1.16241	1.03774	1.39677	1.05054	0.974189	1.19288	0.704634	0.623728	0.754027	0.798011	0.659573	0.684981	0.730581	0.746898	0.627749	0.68642	0.63022	0.7326	0.47823	0.508968	0.645738	0.561329	0.580571	0.606992
Fcer2a	0	0.0200591	0.0234971	0.0152086	0.00644069	0	0.0247116	0	0.0542699	0.0186506	0.0152836	0.0181651	0.0392695	0.0673874	0.0310015	0.0286023	0.044167	0.0276398	0.0213306	0.0371814	0	0.00647589	0	0.0167151
Cyp2a5	0	0	0	0	0	0	0	0	0	0	0	0	0	0	0	0	0	0	0	0	0	0	0	0
Atp4a	0	0	0	0.00709813	0.00601195	0	0.258346	0.236596	0.1182	0.394607	0.256791	0.356074	0.390991	0.169834	0.159158	0.32038	0.340123	0.432149	0.109509	0.0277651	0.0945962	0.0544033	0.09565	0.0312049
Trim28	3.63383	3.81682	3.6592	4.45342	4.75571	3.59698	4.41194	4.45283	2.84534	5.4819	5.054	3.66406	5.43452	5.34339	3.34407	5.49441	4.99941	4.39948	3.84404	3.10037	3.92905	4.04742	3.1758	2.07766
Ube2m	1.31844	1.44979	1.66739	2.60814	1.80278	1.71579	2.57191	3.3118	1.33124	2.67147	2.89212	1.93354	3.58649	3.79897	1.46661	3.38277	3.5477	2.04309	4.79323	2.60914	1.96908	3.03807	2.76567	1.68036
Adcy9	0.185017	0.126966	0.167775	0.138706	0.168088	0.152845	0.137305	0.12058	0.134244	0.11398	0.101027	0.104216	0.12428	0.110941	0.143545	0.12218	0.156477	0.117638	0.104752	0.0674727	0.104953	0.0932868	0.131244	0.118829
Mef2c	5.41734	4.57534	6.40453	5.11298	4.19595	4.61204	0.088978	0.137561	0.1357	0.146545	0.241732	0.229569	0.414902	0.489391	0.134803	0.472024	0.719765	0.380586	0.127736	0.12707	0.087801	0.108683	0.185805	0.110935
Ctr9	2.11036	1.91644	1.77958	1.74846	1.88108	1.70369	4.90417	4.29258	5.58966	3.96693	3.83299	3.77304	3.66571	3.487	4.97942	3.00505	2.63147	2.75456	1.03992	0.934165	1.03738	1.41852	0.868666	0.852806
Eif4g2	92.8381	89.9793	82.6403	89.383	82.7359	74.8699	101.462	101.606	94.6986	130.512	110.193	139.797	78.1078	73.4271	68.8968	86.9675	67.9631	85.7491	52.7147	51.7002	52.1062	63.3307	48.2763	52.105
Mrvi1	0.0541187	0.0378701	0.0358299	0.0546648	0.0575241	0.0299394	0.00592143	0.00157757	0.00197034	0.00677136	0.00221956	0.00263803	0.0114058	0.0205513	0.00731608	0.0197304	0.0210465	0.00752625	0	0.000809952	0	0	0.000858543	0
Pcyt1a	0.786055	0.668726	0.8032	0.670555	0.901817	0.755047	2.48262	2.06066	2.24074	2.15256	2.01655	1.91399	1.75538	1.7618	1.86907	1.62773	1.54605	1.5749	1.0186	1.37432	1.3684	1.37563	1.25247	1.2385
Zfp592	2.2577	2.41177	1.90171	2.05211	2.57368	2.14169	0.757018	0.782077	0.540477	0.750982	0.807409	0.624642	1.05941	1.0452	0.773945	0.79697	0.975017	1.015	1.24196	1.31508	1.38508	1.45815	1.33304	1.10043
Psmd4	6.182	5.70083	5.79407	6.46441	6.34737	5.39952	8.0001	7.54562	4.53635	7.42856	8.69361	6.46838	10.3891	9.4209	5.5585	8.71456	7.64216	6.92247	9.53457	6.85302	5.49106	8.50941	6.88859	4.76793
Tmod4	0.125552	0.122999	0.0823316	0.0399673	0.0338514	0.0802622	0.0129881	0	0.0316928	0	0.013388	0.0477367	0.0171996	0.0354179	0	0	0.0435255	0.0181589	0.0840829	0	0.0190229	0.0170182	0.0207144	0.0439262
Insrr	0	0	0	0	0	0.00495928	0	0.00470367	0	0	0	0.00393277	0.0127528	0	0	0	0	0	0	0	0	0	0	0
Cabp5	0	0	0	0	0	0	0	0.0083752	0	0	0.00589174	0	0	0	0	0	0	0	0	0	0	0	0	0
Snx6	3.54467	3.52348	3.01806	3.16208	2.84052	2.38994	1.54696	1.36881	1.42999	1.32391	1.38404	1.57175	1.14305	1.30257	1.13938	1.07643	0.939161	0.963005	0.784845	0.775862	0.501676	0.732781	0.659515	0.673997
Mthfd2	0.423259	0.419589	0.385493	0.411696	0.36851	0.352316	0.307104	0.405444	0.274525	0.240961	0.307159	0.242139	0.322127	0.377271	0.244769	0.328474	0.234364	0.208308	0.38057	0.247049	0.244939	0.561762	0.271569	0.215955
Kit	0.0130752	0.031515	0.0142902	0.0150303	0.0332948	0.0185747	0.187861	0.195993	0.0980992	0.451821	0.516648	0.408757	0.776182	0.861668	0.405365	1.04225	0.789884	0.749083	0.0340531	0.0418334	0.0209113	0.0541536	0.0611215	0.0457454
Tomm40l	0.127931	0.089521	0.0299612	0.1309	0.135507	0.0438122	0.0850765	0.110811	0.0922663	0.0832353	0.126673	0.0231624	0.388063	0.154667	0.168003	0.310002	0.179512	0.0792982	0.244788	0.341353	0.235368	0.359198	0.422137	0.127881
Nr1i3	0	0	0.0144732	0	0.0238031	0	0.00913274	0	0	0	0	0	0	0	0	0.0352355	0	0.0127687	0.0394161	0	0	0	0.0145656	0.0154437
Apoa2	0.179393	0.0627661	0.367618	0	0.0604598	0.143351	0.185577	0.203944	0.113209	0.175077	0.334762	0.0568397	0.122876	0.126515	0	0.0894981	0.621905	0.194595	0.700818	0	0.135902	0.364742	0.22198	0.156908
Pan2	3.82465	3.28083	5.28634	3.85719	3.05805	5.41167	3.25729	3.42349	3.59961	2.93462	3.27674	3.16327	3.25658	3.18096	3.28765	3.64513	2.70514	2.94228	1.86216	1.59603	2.33293	2.35076	2.06168	1.47077
Cs	4.85093	5.04468	3.91723	5.14098	5.23163	4.05288	7.85268	7.7353	6.17709	8.52785	8.1867	6.65015	8.74752	8.29188	6.38116	8.33378	8.34736	7.04726	22.5693	21.9709	23.181	23.2739	22.0251	19.7443
Ampd3	0.516273	0.508033	0.599514	0.436545	0.518366	0.474862	1.95687	1.77913	0.687242	3.11059	2.65224	1.56763	3.63202	3.82492	1.62559	3.80446	3.80949	3.88905	1.23654	1.27651	1.16111	1.49617	1.25771	0.889016
Bcas2	5.28493	4.44004	5.33074	4.33183	4.11692	4.23579	6.44106	6.49991	4.04412	6.94911	6.21761	5.3544	7.47834	7.33156	4.25247	8.16249	5.24775	5.85865	4.94519	4.13759	3.87184	4.622	3.09357	3.08629
Sh2d1a	0	0.00618857	0.0108739	0.0140764	0.00298059	0	0	0	0	0	0	0	0.00302882	0	0	0	0	0.00319775	0	0	0	0	0	0
Ctcf	2.33573	2.14757	2.77835	2.31998	2.21383	2.4012	1.49855	1.64978	1.35103	1.90837	1.60348	1.71409	1.53489	1.59843	1.16737	1.67054	1.30956	1.75771	0.801298	0.96575	0.932324	1.00958	0.905244	0.897022
Pard6a	0.303699	0.531293	0.497882	0.402822	0.750598	0.323578	2.19919	1.99485	1.11799	2.17355	2.83364	1.82829	5.13119	4.39072	1.50538	3.83836	5.11798	3.11133	4.97173	4.49069	3.29771	4.18516	3.88324	4.11733
Agrp	0	0.00117639	0	0	0.00566584	0	0.00347818	0.00127414	0.00318273	0.00218758	0.0035853	0	0.0103635	0.0106705	0.00181812	0.00167742	0.00291401	0.00364719	0.00375288	0.00130833	0	0.00341808	0.00277364	0.00588168
Pvalb	0	0	0	0.00618753	0.0052407	0	0.253354	0.218029	0.137382	0.293398	0.219703	0.236491	0.260949	0.208362	0.105106	0.13964	0.17969	0.202411	0.043391	0.0786604	0.0176701	0.0474241	0.0448966	0.0136009
Tfap4	0.179918	0.240852	0.262896	0.423327	0.237275	0.381306	0.076876	0.0118575	0.0345558	0.091612	0.0959264	0.114012	0.133952	0.0606846	0.0211499	0.1483	0.167231	0.0848542	0.183358	0.176547	0.207414	0.349905	0.161326	0.102631
Ranbp1	1.28836	0.734246	0.958076	1.20501	1.06538	0.965835	1.49078	1.37911	0.80466	1.50365	1.86953	1.15309	2.06516	2.05138	0.79004	2.16019	1.51182	1.36392	2.92054	2.27407	1.68036	2.55648	1.97222	1.03394
Cd247	0.00268291	0.0028161	0.00549793	0.00427028	0.00542525	0.00107195	0	0	0.00084655	0	0	0	0.00183768	0.00473026	0.00145077	0	0.000775077	0.000970089	0	0.00104398	0.00203249	0.0018183	0.00110661	0.00234664
Rfx5	2.09563	2.28854	2.09517	2.21105	2.55759	2.11863	1.46989	1.54016	0.851601	1.95225	1.83681	1.14689	2.1205	2.07134	0.875654	2.53454	2.14647	1.53844	1.36447	1.66798	1.59961	2.35637	1.82043	1.66633
Psmb4	21.134	18.9354	14.674	24.7339	18.2117	10.6957	33.394	29.3341	18.1749	30.5204	30.4014	21.9793	41.9517	40.6808	17.9936	35.3936	27.4627	21.8461	50.6013	38.216	27.9084	45.6939	33.4667	21.3485
Mmp8	0.0237008	0.149264	0.0582823	0.179187	0.0559143	0.0852261	0.0122589	0.017963	0.0224352	0.038551	0.0126365	0.00750948	0	0.0083574	0.0256321	0	0.0273881	0.00856975	0	0	0	0	0	0
Slc30a4	1.4752	1.22244	1.96383	1.20931	1.23734	1.47131	1.76988	1.63085	1.8129	1.72476	1.64993	1.82043	1.77018	1.47451	1.52943	1.79289	1.40349	1.76464	0.891381	0.88047	0.831871	0.943412	0.873816	1.21754
Sqor	3.67545	3.05594	3.22591	2.66048	2.93642	2.71423	0.232955	0.278361	0.241928	0.0907004	0.158657	0.166485	0.13772	0.162596	0.282683	0.077573	0.085193	0.112444	0.556569	0.446481	0.373692	0.457861	0.468843	0.246208
Bloc1s6	1.51647	1.44773	2.10429	1.37926	1.35073	1.48012	1.10933	1.06724	0.772431	1.31789	1.09152	1.03647	1.47646	1.37504	0.732161	1.50231	1.42695	1.43348	1.30575	1.3825	1.09959	1.14522	1.39395	1.18428
Metap1	1.35341	1.4587	1.32298	1.01828	1.20325	1.21203	1.48657	1.53275	1.41859	1.44737	1.29804	1.2914	1.03891	1.23973	0.967388	0.931326	0.941529	0.899988	0.746642	0.808125	0.665859	0.727478	0.548613	0.571479
Gpr108	4.32846	5.10034	4.64134	4.37609	5.31896	4.229	3.22696	3.26752	2.72612	2.56427	2.95471	2.21941	2.73493	2.80379	2.61513	2.17233	2.45618	2.05982	3.80359	3.85748	3.18132	3.19599	3.20865	2.73972
Tnfsf14	0	0.0177513	0.0623813	0.0403767	0.0341982	0.0405423	0	0	0	0	0	0	0	0	0	0	0	0	0	0	0	0	0	0
Gata6	0	0	0.00290188	0	0	0	0	0	0	0	0	0	0.00242488	0.00249669	0	0	0.00204548	0.00256013	0	0	0	0	0	0
Rsl1d1	6.90535	7.75383	7.2493	7.51292	7.09007	7.3604	8.7038	8.73716	7.4487	11.6798	9.74244	10.6271	7.76264	8.11387	5.64445	9.86587	7.31026	7.75596	5.32617	6.06142	5.56149	5.40298	4.73127	4.94624
Cnga2	0.10352	0.0452747	0.137889	0.0720864	0.0479722	0.0775521	0.00669307	0.00980732	0.0122491	0.0463053	0	0	0.00443168	0	0	0.0258229	0	0.0233943	0	0.0151057	0	0.00438495	0	0
Apc	4.91866	4.054	4.65775	4.38161	3.41238	4.52854	4.29523	4.74272	7.84415	3.83858	3.32765	4.00544	4.91823	4.76533	6.52918	3.99647	4.19466	4.22423	1.77651	1.73194	1.89146	2.60359	1.98826	2.22882
Reep5	5.12692	6.20924	5.26399	5.4024	6.5932	4.77699	31.999	31.7771	26.8498	17.5105	27.131	26.1536	14.4625	14.2044	17.9355	9.26007	13.1879	13.2254	9.01335	9.93221	9.68994	8.95305	8.36131	8.19572
Ergic3	15.5615	15.7651	15.8208	15.5173	18.7162	13.4465	13.1907	11.222	6.70568	15.308	13.8198	8.13912	21.1985	19.2792	8.97993	20.3126	17.8013	15.822	22.4634	17.714	17.305	20.1092	17.8187	13.9157
Uqcc1	0.139626	0.179458	0.216056	0.174615	0.172865	0.166223	0.242453	0.257	0.151052	0.245652	0.240044	0.199531	0.269348	0.261248	0.168724	0.248782	0.208272	0.2174	0.297382	0.283855	0.241775	0.3341	0.26915	0.216835
Spo11	0.007486	0.00523841	0.00613624	0	0	0	0	0	0	0.00974119	0.00798257	0.0047438	0	0.0105589	0.00404801	0.00746945	0	0	0.0334227	0.0291297	0.0170135	0.010147	0.0308772	0.00654771
Ncoa2	0.896246	0.898974	0.948161	0.870241	0.83901	0.89725	0.638065	0.593019	0.673157	0.684149	0.610255	0.606403	0.703964	0.718035	0.710276	0.732772	0.666587	0.77066	0.309933	0.378271	0.503862	0.440137	0.35924	0.47247
Prl4a1	0	0	0	0	0	0	0	0	0	0	0	0	0	0	0	0	0	0	0	0	0	0	0	0
Trh	0	0	0	0	0	0.0366822	0	0.0347915	0	0.029867	0.0244749	0	0.0943286	0	0.0248228	0.320624	0.742651	0.19918	0.0512379	0	0	0.0311113	0.265079	0.0401512
Nr2c2	1.31887	1.1476	1.47238	1.22415	1.14988	1.64959	0.891271	0.85399	0.955334	1.17149	0.950056	1.19095	1.00844	0.976631	0.822474	1.12429	0.974899	1.102	0.63364	0.727409	0.733063	0.763655	0.633867	0.917838
Nr2c1	0.490487	0.456505	0.592182	0.426879	0.45276	0.501998	0.521144	0.542049	0.542822	0.432311	0.453458	0.53436	0.367407	0.388512	0.41548	0.39538	0.474655	0.396636	0.196873	0.167354	0.234295	0.204692	0.145503	0.276849
Smpd4	1.34365	1.66826	1.42262	1.50373	1.5881	1.75595	1.31516	1.46389	1.28073	1.81825	1.55715	1.5137	2.0516	2.15842	1.49603	2.23447	1.94086	1.92648	1.53099	1.98971	1.91564	1.98886	1.52793	1.62003
Pex1	0.73042	0.567686	0.783308	0.70536	0.55072	0.867435	0.707816	0.822725	0.94193	0.678097	0.643415	0.739112	0.533924	0.608782	0.754033	0.61646	0.5071	0.611723	0.338356	0.307814	0.345566	0.356109	0.385821	0.303021
Otx1	0.014613	0	0	0.023259	0.0492495	0.0583858	0.166285	0.199355	0.0184436	0.256706	0.241526	0.138902	0.590548	0.587426	0.181744	0.554067	0.861208	0.285324	4.1266	5.47017	7.10717	4.54582	5.93094	4.37125
Kctd20	3.78849	3.43548	3.90805	3.39657	3.74623	3.50762	2.67211	2.88667	1.96463	2.84715	3.07125	2.72168	3.95024	3.11472	2.08877	3.65882	2.57522	2.88131	2.66079	1.89725	2.16404	2.55385	2.0835	1.65387
Itgae	0.522518	0.438765	0.806927	0.490685	0.445185	0.703137	0.00324319	0.00475223	0.00923284	0.00271972	0.00668614	0.0172179	0.0143161	0.0147401	0.0101717	0.0145982	0.00603808	0.00755729	0.00466577	0.0130127	0.00316674	0.0184147	0.010345	0.0237653
Ctns	4.22423	4.8512	4.93843	4.61094	5.30051	4.5991	2.43964	2.45511	1.89857	2.24778	2.15786	2.23315	2.21354	2.15971	1.76414	2.19573	1.96946	2.23684	2.60225	2.14375	2.68719	2.14848	1.97403	2.29493
P2rx5	0	0.0203437	0.0238304	0.0231366	0.0653207	0	0.0100249	0.0293788	0.00611554	0.00630509	0.0103336	0.0307047	0.0597399	0.0410061	0.0262011	0.0193387	0.0615913	0.021024	0	0.0301672	0.05139	0.00656777	0	0.0169523
Shpk	0.104373	0.169311	0.194441	0.158575	0.11832	0.178181	0.198765	0.168997	0.140715	0.101862	0.166945	0.168357	0.168979	0.150562	0.128271	0.11361	0.137058	0.126941	0.26477	0.114457	0.136575	0.196135	0.16046	0.186732
Trpv1	0	0	0.0036148	0.00701911	0	0	0.00228098	0.0133692	0	0.00860767	0	0	0	0	0.00953857	0	0	0	0	0.00686401	0.00334083	0.00298876	0	0
Ephb3	0.256275	0.170365	0.199564	0.203952	0.215928	0.184309	0.42749	0.383609	0.0727772	0.779509	0.604621	0.198939	1.69394	1.85255	0.599355	1.95617	1.8435	1.48726	2.53153	2.32852	2.28607	2.2449	2.12467	1.64193
Tuft1	0.0850477	0.0721371	0.0823883	0.0984487	0.0833838	0.0700204	0	0.0078131	0.00162639	0.0050304	0.00687039	0.00489944	0.00353055	0.00727021	0.00139361	0.0128575	0.00744537	0.0111824	0.0258895	0.0100285	0.00195241	0.0122266	0.0148821	0.00676253
Rcn1	0.492614	0.280877	0.575779	0.326697	0.491921	0.386354	3.51527	3.12512	0.990188	4.82543	3.86672	3.04071	6.75464	7.08978	1.83998	7.18173	4.81229	4.01759	1.70044	1.87427	2.12856	2.08354	1.8362	1.3724
Dnase1	0.462743	0.485714	0.790224	0.552396	0.649816	0.862806	0.877608	1.19828	1.09508	1.00358	1.19247	1.02632	1.37349	0.870255	0.625563	0.961916	1.11403	0.613502	0.0860836	0	1.1101	0.365886	0.604408	0.2361
Trap1	1.11137	1.30714	1.41537	1.21926	1.30144	1.3221	1.77324	1.70604	1.15505	1.44005	1.61193	1.46026	1.66656	1.4613	1.41074	1.1841	1.24074	1.15333	1.62945	1.43176	1.42464	1.65962	1.47621	1.10937
Naa60	1.84536	1.87664	1.61187	1.6029	1.8423	1.55377	0.971567	0.909234	0.636681	1.11471	1.18535	0.883432	1.38964	1.30142	0.876852	1.20068	1.4287	1.17	1.208	0.985026	1.0339	0.875215	1.02596	0.799009
1700037C18Rik	0.290302	0.129272	0.180272	0.196026	0.272763	0.1898	0.100103	0.120012	0.0610667	0.0457887	0.0938055	0.0445966	0.114486	0.130285	0.0808678	0.0965533	0.12707	0.0508933	0.108009	0.157463	0.0266574	0.0596204	0.0507986	0.038472
Ankrd13d	0.486141	0.564832	0.744344	0.430684	0.680097	0.579042	0.531367	0.556149	0.248903	0.602754	0.625978	0.372	0.879585	1.06089	0.342237	1.12572	1.04405	0.749548	0.491428	0.485412	0.597595	0.733546	0.809633	0.433231
Tyrp1	0	0	0	0	0	0	0	0	0	0	0	0	0	0	0	0	0	0	0	0	0	0	0	0
Tpr	12.3974	8.10574	9.70486	10.3433	6.30245	7.29363	2.86169	3.3287	3.89868	4.15359	2.97978	4.03623	2.65045	2.51756	2.67096	2.79551	1.85932	2.6899	0.996706	0.647967	0.687521	1.50663	0.829359	0.917588
Pdc	0.00820262	0	0	0.00652788	0	0	0	0	0.00517641	0	0	0	0	0	0	0	0	0	0	0	0	0	0	0
Odr4	1.56718	1.27463	1.45937	1.49129	1.1572	1.0969	1.02922	1.1651	1.49648	1.25084	1.14467	1.44818	0.722466	0.812445	0.934412	0.877025	0.710999	0.838498	0.559426	0.506489	0.399527	0.712313	0.5739	0.497266
Prg4	0.00709411	0.0148926	0.01163	0.0112914	0.0143454	0.0113377	0.0403627	0.03226	0.0447687	0.0323094	0	0.00899094	0.00971833	0.00500307	0.0191805	0	0.0204944	0.0359113	0	0.00552095	0	0.0192317	0	0
Dhx34	0.778312	0.781865	1.04112	0.953805	1.22948	0.969162	0.385283	0.332942	0.238051	0.512604	0.504074	0.284427	0.608334	0.622982	0.371809	0.438321	0.54626	0.397099	0.639557	0.709766	0.426845	0.601919	0.492373	0.492819
Kptn	0.483438	0.632932	0.370706	0.570896	0.683257	0.37385	0.887281	0.957368	0.787309	1.03493	1.26382	0.96846	2.11499	2.00165	0.910739	1.92948	1.36959	1.0037	1.28808	1.38356	1.70123	1.86016	1.62094	1.18669
Napa	3.31875	3.43449	2.97493	3.50862	4.23183	3.3089	4.23003	4.44446	3.4163	3.55388	4.98691	3.84338	4.46298	5.20497	4.66923	3.53015	4.30653	4.00732	4.03055	3.95713	3.40913	4.03623	3.62186	2.70038
Sra1	9.57336	9.01256	9.68533	7.34422	8.95271	11.027	13.1004	12.5068	8.99867	11.4847	12.8141	12.0966	12.7799	12.1041	11.4728	10.4414	9.81693	10.0208	10.7818	11.8356	10.65	9.99532	10.2452	8.9015
Calcoco2	0	0	0	0	0	0	0	0	0	0	0	0	0	0	0	0	0	0	0	0.0219558	0.00712417	0.0127468	0.00775766	0
Atp5g1	1.04589	0.695278	0.442943	0.846221	0.810727	0.626821	1.35243	1.33435	0.814032	1.67853	2.09112	1.59064	1.74321	2.12676	1.018	1.84365	2.4877	1.42445	2.74338	2.469	1.94121	2.09106	2.30076	1.28072
Snf8	1.71474	1.59767	2.00351	1.81701	1.90295	1.7639	1.86206	1.69452	1.10005	1.92312	1.8992	1.50085	2.1998	2.07119	1.31145	1.95672	1.61477	1.64424	2.27348	1.88008	1.41387	1.79136	1.40673	1.2678
Tbcb	4.59858	4.44378	3.62583	5.10032	5.25468	3.5347	9.91443	9.69242	5.48158	11.0275	10.8969	6.69774	11.6594	12.4988	6.22058	10.7937	9.7339	8.62522	11.5692	9.97524	8.36097	11.1011	8.70702	5.96306
Inpp5k	5.06414	4.22266	5.7036	5.22021	4.96791	5.65584	1.79093	1.58159	1.82438	1.6777	1.77876	1.80248	1.64787	1.79509	2.01247	1.47212	1.69723	1.72536	2.42566	2.61708	2.38644	2.82859	2.40676	2.02288
Crkl	2.82308	2.80368	2.59989	2.70297	3.30182	2.52115	3.46148	3.57282	2.75908	4.1491	3.76651	3.33995	4.57931	4.33896	3.13109	4.32228	4.24639	4.09763	2.8367	3.32949	3.5433	3.0131	3.20563	3.09388
Upk3bl	0	0	0	0	0	0	0	0	0	0	0	0.00765839	0	0	0	0	0	0	0.0134894	0.0282161	0.00915551	0.0163814	0.00996962	0.0105706
Eps8l1	0.935762	1.85529	0.826042	1.94292	1.18872	1.37569	0.170645	0.436442	0.189272	0.405888	0.402971	0.395322	0.225978	0.769928	0.256247	0.526699	0.443628	0.498854	0.241032	0.798275	0.604386	0.906577	0.361228	0.592869
Clint1	4.06823	3.86613	4.37763	3.73745	3.89341	3.59411	2.26667	2.1267	1.66851	2.48081	2.18633	1.79997	1.8998	1.83318	1.36506	2.01547	1.4773	1.40799	1.01084	1.03276	0.816535	1.13143	0.807247	0.861226
Prss16	0.0314038	0.0659255	0.0128708	0.0249921	0.0317516	0	0	0	0	0	0	0.00995014	0	0	0	0	0	0	0	0	0	0	0	0
Cdkal1	0.0379495	0.0321924	0.0426987	0.0293466	0.0330607	0.0482055	0.0174067	0.0210289	0.0155892	0.0221287	0.024051	0.017469	0.0230511	0.023355	0.0172298	0.0255414	0.022961	0.0204532	0.0171831	0.0203394	0.0226469	0.025113	0.0187539	0.0192581
Rhox6	0	0	0	0	0	0	0	0	0	0	0	0	0	0	0	0	0	0	0	0	0	0	0	0
Cdcp3	0	0	0	0	0	0	0	0	0	0	0	0	0	0.000634737	0	0	0	0	0.00401835	0.00490308	0	0.000609979	0.00222738	0
Htra1	0.0671605	0.0386041	0.0294917	0.0362685	0.0533534	0.0517507	0.611635	0.401757	0.157422	0.594584	0.470616	0.334392	2.24753	1.53934	0.741896	1.57957	1.5799	1.98087	32.0065	21.676	25.2213	26.286	23.0931	20.839
Zbtb17	0.587192	0.532376	0.678031	0.755815	0.726201	0.718112	0.581025	0.510824	0.393114	0.584693	0.770428	0.462695	0.758937	0.88224	0.496988	0.621557	0.675594	0.557563	0.712401	0.564269	0.765896	0.775157	0.593909	0.486798
Clcnkb	0	0	0	0	0	0	0	0	0	0	0	0	0	0	0	0	0	0	0	0	0	0	0	0
Fam131c	0	0	0	0.00592808	0	0	0.00385287	0	0	0.00969296	0.0397152	0.0188812	0.0714308	0.152346	0.00805592	0.0891896	0.266842	0.0269339	0.0166286	0	0.0169292	0.0454355	0	0
Fblim1	0.561909	0.767021	0.661698	0.705417	1.06425	0.939141	0.0122806	0.0239929	0.0174804	0.0180222	0.0738429	0.0200606	0.0352358	0.0111629	0.019258	0.0473803	0.0457273	0.022893	0.00441682	0.00307959	0.02698	0.0107275	0.00979303	0.0138445
Hspb7	0	0	0.0214958	0	0.0176764	0	0	0	0	0	0	0	0	0	0	0	0.0303039	0	0	0	0.0397331	0	0	0
Epor	2.60439	2.7427	2.55754	3.11923	2.43335	2.2872	0.146712	0.17589	0.113909	0.452981	0.316209	0.245105	0.158961	0.200039	0.0976053	0.180103	0.104292	0.354301	0	0.0401356	0.214881	0.0524282	0.0425434	0
Ccdc159	0	0	0.0115961	0	0.0476784	0	0.307326	0.375269	0.383888	0.266926	0.309248	0.259977	0.23256	0.369147	0.267744	0.282312	0.269738	0.306913	0.157904	0.286252	0.375102	0.488978	0.268414	0.408332
Mob1b	1.5512	1.28492	1.55457	1.40243	1.06775	1.19137	0.574112	0.670917	0.693541	1.00212	0.656086	0.821465	0.762151	0.87943	0.51573	1.13485	0.718911	0.832407	0.593452	0.678257	0.377872	0.774545	0.605905	0.620856
Atp6v1b1	0.00749119	0.0157261	0.0184215	0	0.00504943	0	0.00774944	0.0170328	0.0094549	0.00487397	0	0.00474709	0.0102623	0.0105662	0.00405081	0	0.00432831	0.00541733	0	0	0	0.00507703	0.00617972	0.00655225
Vax1	0	0	0	0	0	0.0245465	0.0317769	0	0	0.0199859	0	0	0.147283	0	0.0166105	0.3065	0.0887422	0.066642	0.137146	0.23906	0.209438	0.208186	0.101361	0.188074
Atp6v1b2	6.5339	6.73217	5.82997	6.38474	7.36053	6.01687	7.35511	6.5261	5.14968	6.79009	8.08977	6.29483	9.28865	9.36644	5.90228	8.24631	9.7695	7.4682	5.12308	4.19196	4.34281	4.80101	4.83459	3.30952
Eps15l1	1.13588	1.5039	1.44686	1.22841	1.36302	1.41757	1.06655	1.12509	0.910702	1.26664	1.22461	0.959414	1.29907	1.46359	1.10384	1.30138	1.41842	1.27646	1.33214	1.18057	1.4256	1.36746	1.15148	1.11495
Tep1	2.47914	2.46092	2.87432	2.87199	2.4773	2.59376	0.0766737	0.0910419	0.0999992	0.0931213	0.0803977	0.0793599	0.0245087	0.0252345	0.0649558	0.0102006	0.0634987	0.0499031	0.108404	0.161112	0.203301	0.169752	0.143369	0.140834
Ttc5	2.89671	2.07664	2.98498	2.35704	2.20356	2.3667	1.89273	1.99381	1.6676	2.26546	1.86592	1.85434	1.88289	1.70935	1.26908	2.18247	1.44483	1.58178	1.41866	1.12257	1.4555	1.56655	1.33622	0.935893
Osgep	2.48473	1.9555	2.59748	2.39859	2.21861	2.27949	1.3553	1.13481	0.810491	1.27231	1.29037	1.11241	1.61352	1.46559	0.753814	1.34587	1.08885	1.16679	1.1958	1.28078	1.07074	1.5309	1.02221	0.84674
Aamp	9.31758	6.74082	6.20553	8.82487	8.4558	5.62299	8.4967	8.22043	5.43596	7.08844	7.50348	5.78145	10.1715	8.40218	5.18275	9.17593	7.96321	6.87849	12.8917	9.47963	10.2939	11.7581	8.10672	5.83639
Tmbim1	2.77026	1.94331	2.52308	2.16111	2.43901	2.89694	22.3884	23.8214	22.3082	10.6765	15.5797	18.3394	8.33031	9.13659	20.5615	2.62764	6.0547	7.90456	10.9407	9.69374	11.1462	8.67823	9.84645	7.51441
Arpc2	18.2868	16.5812	16.9183	17.6711	16.7151	16.9158	4.06244	3.86658	3.10276	5.30748	5.14026	4.39099	5.31132	4.91027	3.22281	5.70685	4.51236	4.84776	3.97655	3.92139	3.66867	4.7037	3.34485	3.36204
Kmt2b	3.24217	3.76729	3.79025	3.32286	4.04014	4.45024	2.88674	2.84262	2.29518	3.30428	2.9597	2.11139	3.12216	3.10072	2.29984	2.98432	2.8756	2.72529	2.40365	2.33233	2.97731	2.35139	2.64496	1.90448
Zbtb32	0	0.0630857	0.0316706	0.0409981	0.0694489	0.0205831	0.00666151	0.0292833	0.00812754	0.00837945	0	0	0.0176432	0	0.027857	0.0385517	0.0148827	0.00931361	0	0.0501151	0	0.0610999	0.031873	0.0112648
Etv2	0	0	0	0	0	0.0849466	0	0	0	0	0	0	0	0	0	0	0.0307105	0	0	0	0	0	0	0
Upk1a	0.0121833	0.0170507	0.00998656	0.0290874	0.0164242	0.00973555	0.0315082	0.0554025	0.0999501	0.0871944	0.0259828	0.0849245	0.0667601	0.154659	0.0329401	0.13372	0.0351967	0.0352418	0.0271973	0.0758524	0.0461483	0.033028	0.190957	0.0959059
Tmem147	7.94903	9.22548	6.99255	8.58906	8.58158	7.64307	23.3321	21.1596	11.2563	22.4534	22.4312	21.9508	32.5357	32.6788	15.4462	32.6931	25.6154	19.068	32.5325	25.7007	21.6888	28.2944	19.1391	14.5837
Rps9	111.849	107.765	74.3389	136.207	112.798	76.0024	37.7006	34.3366	19.4734	42.8167	45.604	27.1789	51.4111	57.1475	24.2768	49.9413	48.3329	39.3919	71.0781	53.6355	45.2657	67.927	48.4467	28.064
Tfpt	1.33634	1.24683	1.44024	1.21121	1.14263	1.06786	2.01602	1.66928	1.07758	1.74697	1.82081	1.17615	2.37309	1.97215	1.21105	1.93835	1.64433	1.59275	2.41693	1.58889	1.63104	1.67719	1.43923	1.16884
Susd2	0.0325521	0.125283	0.173438	0.12953	0.153592	0.338158	0.0926044	0.0986856	0.0616278	0.137665	0.277691	0.0825117	0.189523	0.71167	0.22883	0.324801	0.545437	0.211864	0.109002	0.0886671	0	0.352987	0.255106	0.042708
Ggt5	1.74048	2.05077	1.96516	1.59901	2.2342	1.86123	0.00882591	0.0193988	0.0161524	0.0194285	0.0136466	0.0243293	0.0146098	0.0150424	0.00922701	0.0170258	0.0419012	0.00925477	0.0285689	0.0265592	0.0193902	0.00867342	0	0
Ggt1	0.00966399	0	0	0	0	0.00386121	0.0824765	0.0915548	0.0701343	0.0220068	0.105627	0.0459298	0.0364068	0.0204463	0.0470316	0.0241066	0.0279186	0.0279545	0.11326	0.255712	0.146423	0.167015	0.0837074	0.164828
Crip2	0.270621	0.331398	0.184856	0.323052	0.167211	0.270314	1.22478	1.5212	0.796974	0.89504	1.22643	0.828867	2.5333	4.40553	1.89018	3.19527	3.896	1.87548	31.1877	24.0445	30.735	29.6358	25.8033	18.226
Crip1	1.17858	1.66044	0.927431	1.85088	1.31344	0.590189	0.178817	0.13101	0.119002	0.112466	0.167567	0.139412	0.150691	0.354638	0.161451	0.156796	0.363182	0.204552	1.36812	1.13735	1.67856	2.20458	1.20558	0.838429
Cbfa2t3	0.456316	0.460979	0.615058	0.493576	0.505773	0.553377	0.00581748	0.0121776	0.0101397	0.0250894	0.0274132	0.0213817	0.0495248	0.0441926	0.0173767	0.0464926	0.0770536	0.0383439	0.0269011	0.0362627	0.0194755	0.0174231	0.0265091	0.0154589
Fbln1	0.0339203	0.0319921	0.0459375	0.0446	0.0337989	0.0306409	0.0190705	0.0111775	0.00279209	0.0297458	0.0149399	0.00467281	0.102027	0.0936078	0.0191396	0.0824059	0.0843596	0.0373279	0.485608	0.36728	0.545221	0.452781	0.44771	0.297977
Pgrmc1	1.91714	2.14435	2.48713	2.09035	2.24872	2.30399	2.03008	2.34541	1.86717	2.99559	2.80892	3.10893	5.65589	5.68499	2.58762	6.31108	5.18962	5.8731	2.05562	2.53758	2.96191	2.60886	2.02981	2.33702
Gcat	0.0476726	0.0111198	0.0130257	0.0885249	0.0856898	0.050793	0.205484	0.264963	0.0601693	0.268815	0.194867	0.221537	0.272114	0.403448	0.257786	0.253692	0.211175	0.172375	0.993271	0.655449	0.746382	0.915431	0.589899	0.403074
Tek	0.00437948	0.00980669	0.00287187	0.00278826	0.00472318	0.0132985	0.00724874	0.0139408	0.00386925	0.00455906	0.000933997	0.00388532	0.00599951	0.00803034	0.00520999	0.0131094	0.00657906	0.00633414	0.0107542	0.00817993	0.00597196	0.00534262	0.00578044	0.00995945
Mpl	0	0	0.0129049	0	0	0.00629026	0.105861	0.0894906	0.243413	0.0512158	0.142696	0.149647	0.124012	0.0721694	0.366068	0.0157087	0.0363856	0.0853881	0	0.00612614	0.0119268	0	0.0454556	0
Elovl1	9.65943	8.64163	9.14054	8.71872	10.7966	9.02804	46.1296	42.1834	39.3832	15.2742	29.0752	25.6311	23.9359	28.4734	53.6741	6.97846	16.6444	16.641	7.53349	7.44127	8.07724	5.96645	6.33435	4.55589
Med8	3.02421	2.86464	2.4487	2.93507	2.82154	1.81247	4.71178	3.60581	3.71223	4.41518	3.99169	3.68091	3.6503	3.84944	2.96153	3.44071	2.82346	2.56038	3.16972	2.49708	1.41095	2.6245	2.78379	1.19355
Hyi	6.43003	5.25444	6.36725	5.7354	5.06137	6.34515	2.09819	2.68198	1.90634	2.27428	2.85306	1.75018	3.754	5.08255	2.14687	3.78921	2.79263	2.99594	1.54138	2.14943	2.02694	1.69634	0.88999	1.50982
Cdc20	0.480624	0.485799	0.525287	1.59373	0.449951	0.4054	0.718169	0.364268	0.168504	0.938122	0.640632	0.406089	4.75521	4.9337	1.28503	5.38175	2.53014	2.66469	5.12618	3.09624	3.03422	5.10319	2.88551	1.56476
Adamts4	0.127968	0.0895473	0.181182	0.166649	0.274454	0.241702	85.7401	92.6852	91.5047	29.6329	50.4456	54.8921	19.2677	19.5511	54.4715	3.54037	15.7758	19.5095	0.831041	1.07739	0.846064	0.473065	1.10364	0.457891
Nectin4	1.85669	1.1374	1.76943	1.86108	1.5633	1.63255	0.116306	0.0925148	0.0364889	0.15884	0.14044	0.0814234	0.356444	0.367	0.0868508	0.37821	0.278402	0.315927	0.0573674	0.0199995	0.00973407	0.0217707	0.0158994	0.0112386
Pfdn2	0.717426	0.465293	0.709987	0.654502	0.719474	0.650194	1.26257	1.18032	0.761936	1.17833	1.16618	0.925883	1.3244	1.28958	0.685997	1.09122	1.0363	0.923742	1.02538	0.721746	0.649548	1.06139	0.80835	0.581589
Rnf114	11.9767	10.3638	11.0139	10.243	11.1134	10.1437	5.60171	5.43254	3.31843	5.2716	6.12434	4.50377	5.83693	5.31512	3.34332	4.60167	4.43043	4.02187	4.45415	4.38325	4.16731	4.2759	3.29193	2.71719
C330007P06Rik	0.703073	0.518399	0.777433	0.604589	0.477087	0.614609	0.312402	0.41127	0.385621	0.343847	0.402529	0.393203	0.27634	0.286188	0.26919	0.320156	0.242646	0.27981	0.202772	0.277253	0.201969	0.289416	0.256907	0.299221
Neurl1a	0.57492	0.474515	0.34559	0.537314	0.518687	0.399337	0.0510866	0.0502771	0.0186058	0.0930351	0.0935303	0.0457736	0.307968	0.323326	0.113194	0.305946	0.470164	0.273975	0.0296174	0.0401538	0.0402038	0.0539505	0.0985022	0.0309452
Srm	9.67128	8.43565	7.9275	10.2984	11.8213	10.395	21.2247	22.9447	13.5603	24.6378	28.0697	21.0185	19.8032	20.3897	15.2471	17.397	19.971	15.9333	21.6657	20.1151	18.8326	22.8948	18.7936	11.944
Epha2	1.05149	0.694421	1.11112	1.27369	0.634749	1.2013	0.00873685	0.00320052	0.0026649	0.027475	0.00900592	0.0214078	0.00578493	0.0268031	0.0091339	0.0337081	0.0317188	0.0488607	0.0235672	0.0065728	0.0223937	0.0114479	0.00696712	0
Rbm14	1.32113	1.56334	1.40868	1.38476	2.00545	1.14153	1.44445	1.63625	0.691378	1.78901	1.71227	1.00734	2.00111	2.09825	1.1558	2.12199	2.03555	1.26608	2.07404	1.57985	1.79826	1.72523	1.88728	1.0428
Actn3	0.0213588	0.0249101	0.0583591	0.039662	0.0143969	0.0341354	0.103111	0.140296	0.103338	0.0880121	0.117674	0.0676744	0.0438897	0.0702947	0.065448	0.0994543	0.0699316	0.164756	0.0397337	0.0498672	0.0862975	0.00965041	0.0822248	0.0186817
A530013C23Rik	0.00625597	0.0109442	0.01282	0.0248934	0.0168673	0.0174968	0	0	0	0	0	0	0	0	0	0	0	0	0.00349138	0	0	0	0	0
Zdhhc24	6.8352	5.83354	5.92128	5.69266	6.21445	5.44784	16.0419	16.7461	13.8098	12.652	14.1158	12.7927	8.27484	8.74411	9.64613	7.22542	7.7353	7.17813	8.47698	9.16815	9.00487	9.0614	7.73665	6.72
Bbs1	0.270792	0.261075	0.295956	0.292128	0.470515	0.293326	1.3166	1.35455	0.934189	1.40556	1.65874	1.29271	2.44011	2.41901	1.66929	2.06548	2.77804	1.95826	2.06203	2.46334	2.65775	2.33689	2.2686	2.05797
Slc34a3	0	0	0	0	0.0146559	0	0.224927	0.263667	0.192099	0.0990266	0.150705	0.206676	0.0297862	0.107339	0.211634	0.0867801	0.0251258	0.0471712	0	0	0.0494156	0	0.0179366	0
Ndor1	1.03982	0.631107	1.11326	0.810635	0.979821	1.44138	0.861635	0.948923	0.957516	0.800801	0.956057	0.954771	0.835786	0.905436	1.01554	0.624633	0.545622	0.721268	0.438196	0.644087	0.683242	0.733489	0.577692	0.464027
Nsmf	2.91334	3.94073	2.82224	4.00473	4.65096	3.84292	9.2288	8.35674	7.37167	11.7721	12.3149	7.01363	15.9068	18.639	10.6959	17.3162	22.9459	17.7114	18.0794	20.7094	21.2469	24.44	22.1703	16.2401
Prl7a1	0	0	0	0	0	0	0	0	0	0	0	0	0.0089192	0	0	0	0	0	0	0	0	0	0	0
Prl8a9	0	0	0	0	0	0	0	0	0	0	0	0	0	0	0	0	0	0	0	0	0	0	0	0
Pdk1	4.74863	4.19707	5.02136	4.23605	4.0507	4.04571	2.48426	2.72278	1.97332	2.70844	2.70556	3.30909	0.916789	0.815345	0.673416	0.812915	0.999747	1.0044	0.55428	0.643106	0.587813	0.741473	0.601677	0.475067
Ptbp1	15.1432	15.3241	12.8931	19.1652	18.2461	15.9202	5.43767	5.81693	3.2483	7.63239	6.59752	6.01394	6.44539	6.10148	3.38603	6.72945	6.31986	6.46423	11.2341	10.4081	14.266	13.3077	11.0704	8.9842
Mvd	0.459853	0.677447	0.545569	0.5971	0.701497	0.551197	11.6673	11.4096	5.91088	4.50364	7.29727	5.30662	6.54825	6.45201	5.95481	2.97036	4.33506	4.15684	7.21288	4.81251	4.27212	6.65143	4.56215	2.5403
Cyba	8.81811	7.92485	6.69053	10.3468	10.6007	7.51237	0.0678504	0.0662806	0.0183961	0.0758652	0.06994	0.184725	0.0798681	0.0925126	0.0157631	0.0581727	0.0336859	0.126484	1.0412	0.975516	0.982725	0.928554	0.865707	0.535438
Itih3	0.0782511	0.0657085	0.0897988	0.0249098	0.0738432	0.0625298	1.76063	1.69618	1.55059	0.361477	1.285	0.71901	1.03981	1.0375	2.01413	0.288889	1.28403	0.729986	17.1627	20.7603	15.7212	12.7068	22.2123	14.0924
Stimate	0.223329	0.244887	0.311393	0.194222	0.277791	0.275969	0.315579	0.286175	0.300759	0.218705	0.268831	0.275747	0.24286	0.264666	0.430765	0.160809	0.268715	0.243086	0.31352	0.265186	0.245931	0.330802	0.24121	0.199364
Sfmbt1	0.991573	0.912046	1.15145	0.996049	0.95354	1.07409	0.139047	0.131933	0.148094	0.235119	0.172113	0.177334	0.180361	0.191142	0.145962	0.204472	0.207524	0.216713	0.106988	0.108893	0.110174	0.182193	0.0990665	0.0992565
Itih1	0	0	0	0	0	0	0	0	0	0	0	0.00533791	0	0	0	0	0	0	0	0.0393334	0	0.0228357	0	0
Ihh	0	0	0	0	0.0126017	0.0149395	0	0	0	0	0	0	0.0128057	0.0263698	0	0.0186542	0	0	0.0208675	0	0	0	0	0
Prkag3	0	0.00807506	0	0	0	0	0.00596878	0	0	0.00750807	0.0061526	0.00731261	0	0	0.0249601	0	0	0.0250352	0	0	0	0.0469252	0	0.0504667
Cryba2	0	0	0.030358	0	0	0	0	0	0	0	0	0	0	0	0	0	0	0	0	0	0	0	0	0
Atp7b	0.0105611	0.00369513	0.0187566	0.00840484	0.00949162	0.012659	0.549902	0.464251	0.354344	0.750122	0.543375	0.736172	0.220634	0.183721	0.197976	0.256419	0.235947	0.260944	0.237726	0.412326	0.289361	0.343566	0.246846	0.21246
Defb2	0	0	0	0	0	0	0	0	0	0	0	0	0	0	0	0	0	0	0	0	0	0	0	0
Slc4a1	0	0	0	0	0	0	0.0141487	0.015549	0	0	0	0.00433354	0	0	0.00739584	0.0136469	0	0	0	0	0	0.00463474	0	0.0358886
Rundc3a	0.415551	0.363484	0.244825	0.279035	0.560205	0.456588	5.03091	5.35413	3.67957	4.89199	6.30056	4.46839	7.7652	8.39813	6.88867	7.08763	8.3885	6.17925	4.8702	3.83027	3.44322	4.06608	4.74566	2.70328
Slc4a3	0.0672469	0.0731994	0.0306233	0.0416244	0.0503642	0.0238829	0.568116	0.622927	0.424374	0.821578	0.677239	0.577652	1.7145	1.6757	0.662621	1.56563	2.15858	1.4481	1.76806	1.62818	1.4321	1.88885	1.47315	1.04566
Cdt1	1.11574	1.06603	1.24873	1.8271	1.17148	1.85174	0.377336	0.227668	0.0135405	0.502567	0.388957	0.244742	1.74892	1.45268	0.545317	2.07668	1.22733	1.13271	2.03569	0.851619	1.57671	2.10856	0.743407	1.23863
Runx1t1	0.028483	0.0226995	0.0233474	0.0226676	0.0277318	0.0271862	0.0339665	0.0467727	0.02846	0.088541	0.0864769	0.0596633	0.153909	0.233237	0.0894172	0.192625	0.278857	0.168787	0.0503374	0.0671159	0.0839138	0.04397	0.0613521	0.0595143
Snai3	0	0	0	0	0	0	0	0	0	0	0	0	0	0.0256909	0	0	0	0	0	0	0	0	0.0450765	0
Aprt	6.11486	6.36355	4.71243	7.19559	7.78547	5.93042	11.1645	9.78391	4.51853	16.7641	14.4063	9.17396	12.7442	15.3332	4.3805	15.5923	12.8641	9.86451	14.7589	10.5752	10.2547	17.0375	12.8049	7.45122
Gtf2h1	1.0942	1.05994	1.55113	1.36255	1.07595	1.43328	2.11071	2.4001	1.92803	2.41773	2.54863	2.6675	1.12275	1.24074	0.974538	1.13032	1.10576	1.24744	0.613056	0.601099	0.445349	0.6776	0.552206	0.585494
Hfe	23.4057	20.6404	20.1796	22.4875	20.7539	19.2632	0.369392	0.490206	0.450686	0.683832	0.625035	0.759957	0.516861	0.437138	0.626631	0.37646	0.334779	0.643133	1.36866	1.14305	1.80683	1.39725	0.8448	1.35538
Abhd1	0.0709539	0	0.0193868	0.0188224	0	0.0188996	0	0	0	0.0461645	0	0	0.0162001	0.0333598	0.0383678	0.023599	0.0136654	0.0684147	0.0791969	0.0736259	0.179175	0.0801464	0.312171	0.124121
Slc5a6	0.341198	0.348457	0.317473	0.249519	0.38538	0.287387	0.543751	0.601061	0.261875	0.713978	0.51133	0.309712	0.896927	0.79342	0.463745	0.745297	0.964388	0.840254	0.31908	0.645897	0.398201	0.487483	0.509681	0.395222
Tcf23	0	0	0	0	0	0.0113655	0	0	0	0	0	0	0	0	0	0	0	0	0	0	0	0.00963944	0	0
Nphs1	0.0205562	0.00575377	0.00673992	0.00981554	0.0138559	0.013141	0.00850595	0.00934779	0.00259447	0.00534977	0.00657593	0.0052105	0.0197122	0.0289942	0.0133388	0.0164086	0.0118771	0.0148654	0.238621	0.185574	0.426693	0.181111	0.237405	0.23014
Aplp1	1.11494	1.387	1.2647	1.07551	2.16347	2.31284	202.702	207.259	222.672	107.456	195.807	160.745	107.502	120.669	290.638	50.1736	121.493	112.838	67.3016	64.963	70.9498	51.4439	71.3965	56.7088
Qrich1	2.65891	2.83118	2.71426	2.92973	2.99137	2.67889	2.19195	1.91548	1.71601	2.62169	2.38953	1.97674	2.39953	2.83789	1.8795	2.80893	2.45013	2.36487	1.61241	1.45063	1.65713	1.76859	1.72308	1.34264
P4htm	0.01264	0.0044225	0.0155414	0.0150889	0.01704	0.0252513	1.39257	1.40346	1.11674	1.2706	1.0311	1.15342	1.37227	1.26583	1.13803	1.154	1.05532	0.927787	0.592556	0.52628	0.497935	0.813824	0.464008	0.486452
Usp19	4.33462	5.08132	5.36281	4.51352	6.52616	4.59677	4.49977	4.65152	3.31704	5.00129	4.83814	3.79932	5.35536	5.7068	3.49945	4.85052	4.92121	4.69462	6.4547	5.32807	5.30928	6.74715	6.87584	4.35825
Pola1	0.0482814	0.0449626	0.0604055	0.0635581	0.0393954	0.0417722	0.0123926	0.0184339	0.0123708	0.0214932	0.0216775	0.0184033	0.0246165	0.0340501	0.0172744	0.0249929	0.0186675	0.0202141	0.0214752	0.0237314	0.0129255	0.0226347	0.0182674	0.0142883
Cdc42	9.99253	9.3261	8.2805	10.2433	9.34159	7.47794	7.46581	7.45732	6.39276	6.94271	8.05069	7.56018	6.63251	6.88404	5.29523	6.32158	5.76814	5.80899	4.63999	5.13982	4.29292	5.02043	4.22858	4.03241
Pknox1	1.40263	1.42677	1.50803	1.33202	1.31654	1.23358	0.482232	0.555645	0.438214	0.449996	0.505934	0.415491	0.46237	0.396069	0.385965	0.380938	0.452367	0.360117	0.395256	0.437067	0.289226	0.545618	0.337766	0.377486
D130043K22Rik	0.00423435	0.00888911	0.00173544	0.00336982	0.00998958	0.0101509	0.0153312	0.0160462	0.0106887	0.0275499	0.0372507	0.014758	0.0841102	0.0821217	0.0469388	0.128862	0.185938	0.0979878	0.0496259	0.0280106	0.017643	0.0301325	0.0279444	0.0148145
Gmnn	0.235856	0.354842	0.19333	0.431712	0.333855	0.235588	0.390379	0.232383	0.215819	0.345272	0.389826	0.366175	0.46042	0.781776	0.242321	0.494202	0.327059	0.40082	0.895071	0.385462	0.366288	0.711321	0.437771	0.226923
Acot13	1.43401	1.51743	1.11811	1.58658	1.93908	1.8027	1.65078	2.10741	1.41261	2.03099	2.43822	1.99474	2.14414	2.83047	1.88656	1.85834	2.17747	1.75155	4.09911	4.36876	3.75589	3.81639	3.98166	2.34028
Zfp184	0.166697	0.196181	0.347814	0.180904	0.301335	0.260358	0.227313	0.246939	0.0908523	0.285935	0.242393	0.192063	0.410012	0.44353	0.0983352	0.279735	0.227655	0.345209	0.253723	0.306638	0.378854	0.200277	0.125013	0.28498
Cyp27b1	0	0.0174863	0.0204834	0.019887	0	0.0599056	0.0258505	0.0378786	0.0157698	0.0325171	0.0799398	0.0475058	0.0342328	0.0176233	0.0135126	0.124669	0.0721916	0.0361421	0	0	0	0	0	0.0655707
Cdk4	8.80655	8.94982	8.72905	12.184	10.5388	8.42304	23.308	23.1863	13.2697	32.3336	31.1627	23.1123	28.2303	26.6011	11.9858	28.362	27.6178	20.7125	31.2734	22.0793	23.8329	32.9094	21.8391	15.4529
B4galnt1	3.74692	3.49984	4.19566	4.45956	5.23163	5.36004	1.9467	1.41991	0.833931	3.68943	2.83607	1.71719	7.87131	7.89207	2.58693	9.26315	9.50054	7.47567	0.89619	0.898238	0.608261	1.06565	1.39369	0.512076
Mettl1	0.480096	0.520726	0.472239	0.458489	0.501593	0.901556	0.893964	0.891474	0.605946	1.12451	0.870301	0.791003	1.23317	0.931105	0.233648	0.862262	0.83218	0.659654	1.15212	0.915397	0.527373	0.9924	0.930709	0.755857
Tspan31	10.674	11.9842	11.0347	10.238	12.1614	9.54795	11.2274	10.8368	7.61572	10.8059	11.1272	11.0546	13.4494	13.314	10.1654	12.7169	12.1505	11.2329	16.2262	15.3741	12.1596	13.6585	15.8036	10.416
Kif5b	4.00951	3.27433	3.11385	3.18859	2.62867	2.40817	1.37213	1.66271	2.56124	2.21241	1.72373	2.21884	1.67865	1.94822	2.09631	1.26442	1.30259	1.65329	0.824824	0.795257	0.855042	1.15034	0.992986	0.891257
Saal1	0.657793	0.599064	0.725527	0.48115	0.756363	0.703426	0.81056	0.83213	0.433426	0.915747	0.902571	0.799959	1.19928	1.22798	0.68001	1.2789	1.01164	1.01434	0.798996	0.858224	0.765806	0.753941	0.658343	0.596498
Tph2	0	0	0	0	0	0.000892737	0.00173356	0.00169345	0.000705022	0.00145375	0.00238259	0.000707951	0.00688704	0.00236367	0.000604113	0.00445888	0.00516398	0.00161582	0.00623489	0.00782501	0.00253904	0.0151431	0.0101377	0.00781729
Krt23	0	0	0	0	0	0	0	0	0	0	0	0	0	0	0	0	0	0	0	0	0	0	0	0
Cnp	2.68423	2.75322	2.86032	3.24363	3.5948	3.43756	301.677	316.765	298.332	195.113	313.488	298.587	147.599	160.2	370.914	35.7059	139.509	141.319	26.7202	28.3222	27.1738	17.8616	25.0566	17.5219
Ttc25	0.0176325	0.0493543	0.126466	0.0385894	0.059426	0.0986302	0.0114003	0.0367504	0.0278183	0.0286805	0.0188022	0.0139669	0.0362326	0.0279792	0.0238367	0.0263903	0.0152818	0.0191267	0.078724	0.0926263	0.0534314	0.107552	0.0909103	0.0424118
Sulf2	1.47959	1.68095	1.41573	2.10644	1.87336	1.98281	18.6545	17.2386	10.1519	27.7064	21.8972	20.8871	28.6458	24.351	13.5453	28.6273	23.2873	27.6685	1.48119	1.86611	1.69115	2.2133	1.45327	1.45276
Sod2	0.873012	0.75361	0.654015	0.797276	0.822388	0.697617	1.40648	1.48602	1.10412	1.70169	1.76074	1.30142	1.79638	1.95808	1.05637	1.98136	1.67036	1.43601	2.97123	2.59793	2.10336	2.4564	2.34647	1.62732
Tmco6	1.16296	1.07375	1.19159	1.324	1.65488	1.13582	1.09444	1.37108	1.00912	0.809197	1.37789	0.829073	1.21699	1.38973	1.17911	1.20874	1.32522	1.09798	1.17186	1.21932	2.08018	1.46688	1.89207	0.805277
Stambp	0.889808	0.915666	0.920789	0.756199	0.719187	0.79469	1.14748	1.11076	1.28059	1.15001	0.974592	0.951677	0.907325	1.05062	1.16697	0.948101	0.92588	0.850201	0.503332	0.56715	0.549033	0.622154	0.441747	0.496549
Ezh1	2.28295	2.05395	2.30125	1.6001	2.06234	1.7813	0.779101	0.960688	0.944196	0.756893	0.758279	0.724405	0.75077	0.799087	0.861779	0.654183	0.648844	0.675936	0.405305	0.641073	0.720832	0.688164	0.660117	0.644035
Hap1	0.0270078	0.245687	0.110691	0.128962	0.218455	0.226608	1.69729	1.84224	0.613575	3.1981	2.26794	1.60877	6.08623	6.66646	2.27097	8.03053	5.5943	4.88274	1.17567	0.809217	0.87979	1.1074	1.11398	0.472453
P3h4	0.167654	0.169459	0.137425	0.163073	0.188345	0.0893137	2.35098	2.06128	1.70457	1.97556	1.88706	1.39293	3.29195	2.79826	2.96148	1.93305	2.70154	2.45175	3.59707	3.72579	3.45747	4.05261	3.41147	2.4277
Ctnnb1	7.69884	6.7189	6.80572	7.59598	7.39624	6.35543	5.99185	5.67379	4.16339	8.34516	6.57127	6.72954	10.1461	8.56888	4.57797	9.32657	8.09339	7.73187	7.90223	7.41926	6.7848	9.42132	7.20952	5.51134
Eif1b	13.1584	11.8385	7.86143	12.7311	11.4553	8.39957	33.6729	33.204	19.416	39.3617	39.5779	29.9014	44.9596	49.1048	21.9061	36.9765	35.2875	36.2593	37.724	33.2292	25.2843	29.0937	29.3364	19.9984
Klk4	0	0	0	0	0	0	0	0	0	0.0499519	0	0	0.0175292	0	0	0	0	0	0	0	0	0	0	0
Chrd	0	0.017968	0.0105238	0	0.00865391	0.0410372	0.325392	0.223802	0.0648167	0.568018	0.369639	0.211529	0.976128	1.17707	0.437373	0.947963	0.778893	0.909874	0.329595	0.399665	0.359869	0.565579	0.391869	0.404262
Psmd2	5.38563	4.41916	4.45599	5.58875	5.18306	4.48933	9.44404	9.25106	6.01309	8.55959	8.80826	8.95786	9.62028	7.96691	5.19068	7.78334	7.35611	6.14526	8.16546	6.36957	6.13912	7.43702	6.2349	4.7813
Syngr3	0.0977567	0.188117	0.140229	0.194494	0.494197	0.429641	1.59275	2.07453	0.431838	2.52823	3.04906	1.34736	9.75929	8.47988	2.55056	11.0709	12.2567	6.50383	1.55487	1.31235	0.42583	0.993795	0.967712	0.384768
Vars	2.23978	1.80051	2.10275	2.55345	2.30376	2.59488	2.12458	2.04997	1.15424	2.70274	2.44207	1.72382	2.99929	2.94601	1.16086	2.76067	2.28821	2.07929	2.846	2.3583	2.36023	2.55272	1.75176	1.48454
Vwa7	0.0467812	0.0409196	0.0862793	0.0465374	0.0551825	0.0841107	0.0302462	0.0354557	0.0221416	0.00760929	0	0.0222336	0.0240323	0.00824802	0.037945	0.0116695	0.0067574	0.0253728	0	0	0	0.00792631	0.00964783	0.0306883
Hspa1l	0.0180565	0.0379057	0.148008	0.0287398	0.0243419	0.0432864	0.018679	0.0957957	0.0683692	0.11748	0.105898	0.0915376	0.0865754	0.191013	0.0488196	0.0180166	0.156492	0.104462	0.181388	0.112419	0.123111	0.0489499	0	0.0789664
Slc44a4	0	0	0	0	0	0	0	0	0	0	0.00793558	0.00471588	0.0101948	0	0	0.00742548	0	0.00538172	0	0	0	0	0	0.0130183
Msh5	0.229309	0.233816	0.27926	0.391052	0.225225	0.397891	0.0542205	0.00496556	0.0496148	0.0383644	0.0593834	0.0705796	0.035901	0.0554464	0.0602274	0.0719093	0.102208	0.104234	0.0511899	0.0764822	0.10423	0.0888061	0.0594517	0.103149
Abhd16a	2.84909	2.9269	2.93875	3.2598	3.18709	2.96177	5.29889	5.32943	3.7107	5.17795	5.656	5.03218	5.17831	4.8614	3.71811	4.59685	4.84343	5.1039	4.00168	4.11782	4.84815	4.56027	4.38628	3.49938
Neu1	7.61131	7.76797	7.9386	6.88239	8.99951	9.03228	4.63005	4.4846	3.4309	4.78761	5.58157	4.80719	5.04022	4.60099	3.33637	4.36494	3.88636	4.05958	3.83852	3.89649	3.8696	4.19873	3.54617	2.54349
Ddah2	11.2245	11.9855	8.02273	14.5583	12.0688	7.01414	14.3637	12.5693	5.09811	18.2701	17.6223	8.04811	24.7143	23.611	6.99367	25.6159	20.5333	17.3015	43.0911	32.1003	27.3048	40.3262	28.9959	15.4908
Clic1	8.22719	7.85916	5.32404	11.6196	9.7959	6.96355	0.153979	0.297414	0.222023	0.290532	0.202008	0.403016	0.50977	0.391264	0.168293	0.783096	0.43001	0.381634	2.35616	1.79025	1.97846	3.20061	2.08741	1.15988
Lsm2	2.80232	3.0756	2.36958	5.00027	3.99652	2.42788	4.39416	4.15835	2.4386	7.27386	7.03014	3.90676	9.17303	13.6886	4.94478	12.2146	13.7883	8.6394	16.9235	11.7079	13.2517	15.9535	9.39289	8.74647
Pole	0.134716	0.108897	0.104715	0.39927	0.144036	0.174469	0.14777	0.172518	0.0703574	0.297708	0.200618	0.111862	0.501148	0.530732	0.175838	0.660505	0.493865	0.278827	0.422583	0.321757	0.425824	0.669022	0.367885	0.34943
Atp1a2	0.604272	0.924582	0.591425	0.886431	0.921006	0.778356	7.31465	6.08705	2.35917	12.2847	8.07608	5.33232	24.3645	22.1062	10.8342	25.9848	23.7702	23.3885	144.71	165.827	163.751	145.425	163.317	146.976
Atp1a4	0	0	0	0	0.00229533	0	0	0	0	0	0	0.00215789	0.00233247	0	0	0	0	0.00492513	0	0	0	0.00230787	0.00842738	0.0148923
Casq1	0.095326	0.00833818	0.0195346	0.00948291	0	0.0571307	0.0801225	0.153527	0.112795	0.0775272	0.0698839	0.0226527	0.0652942	0.100842	0.135311	0.0713365	0.0757325	0.155106	0.239401	0.0556402	0.135405	0.177666	0.127786	0.156334
Stx1a	0.116188	0.135507	0.105821	0.113014	0.118925	0.0928452	0.238162	0.24461	0.130351	0.285582	0.435928	0.174524	0.506979	0.719259	0.141945	0.661239	0.984604	0.2863	0.177718	0.177497	0.247762	0.236234	0.163296	0.143028
Ceacam9	0	0.0197871	0	0	0	0	0	0	0	0.0183977	0	0	0	0	0	0	0	0	0	0	0.0214217	0	0	0
Zfp775	0.235854	0.26721	0.248564	0.245797	0.208184	0.228855	0.307885	0.212803	0.159471	0.277676	0.242516	0.245538	0.388488	0.312866	0.160939	0.347395	0.266057	0.312693	0.482632	0.393325	0.442434	0.414838	0.403024	0.383113
Scube2	0.00177377	0.00248243	0.00581579	0	0.00119561	0	0.00458729	0.0026887	0.0033581	0.00577031	0.00756571	0.0146122	0.00607477	0.00375281	0.0153464	0.0141588	0.0225469	0.0179581	0.0178185	0.0207063	0.00940625	0.0360643	0.00585295	0.0325803
Mrpl49	5.59552	4.39498	3.88459	5.06652	4.67609	3.51319	4.72524	4.82508	2.52225	5.64664	5.5405	4.26946	7.54805	7.67092	3.07205	6.89348	6.16913	4.99614	9.78262	8.30944	7.74264	8.14565	8.90214	5.66826
Dennd2c	0.516691	0.34794	0.377115	0.297133	0.336348	0.308249	0.00549147	0.013411	0.00446667	0.00921023	0.00754746	0.0123344	0.0157563	0.0162229	0.0143526	0.0105935	0.0276045	0.0230332	0.00197506	0.00413128	0.00402153	0.00359773	0.00145971	0.00619081
Mark3	2.0177	1.82316	2.55656	1.88359	1.93659	2.4028	1.7449	1.74642	1.36878	1.86457	1.73504	1.74597	1.70388	1.62712	1.1768	1.68665	1.22632	1.44544	1.17233	1.20345	1.09103	1.37633	1.08004	1.07517
Gatad1	1.70041	1.64252	1.43399	1.74712	1.48308	1.26481	2.87934	2.96376	2.8234	2.46455	3.12217	2.40349	3.03429	3.24856	3.04465	2.68433	3.15695	2.70032	4.26631	4.70223	3.9128	4.35067	4.71753	3.74179
Pcdha11	0	0.000455814	0	0	0.000439066	0.000520516	0.0117922	0.00987375	0.00452175	0.00635713	0.00555674	0.00660441	0.015616	0.00826891	0.00598794	0.0155987	0.0143017	0.00895006	0	0	0	0	0.000537348	0.00170922
2310003L06Rik	0	0	0	0	0	0	0	0	0	0	0	0	0	0	0	0	0	0	0	0	0	0	0	0
M6pr	20.3474	21.7102	26.888	20.426	23.4069	24.1453	10.2911	10.5758	8.8394	9.79515	9.7948	10.5068	9.06727	8.05423	8.86528	7.70273	6.95884	8.60419	6.42547	6.30724	7.28522	7.38948	6.64186	6.63618
Lrrc8a	0.651782	0.75909	0.672498	0.667428	0.869451	0.681091	0.45736	0.469808	0.253119	0.480412	0.55893	0.303272	1.34557	1.10255	0.492933	1.13696	1.29305	1.1833	5.02639	4.29208	6.34649	3.88294	5.4106	5.89623
Mc5r	0.0490094	0	0	0.0390031	0	0	1.92656	1.85722	0.603101	4.04963	1.71153	1.27333	3.92761	3.35266	1.6961	4.5967	3.27061	2.42775	0.410273	0.152565	0.18564	0.348761	0.283006	0.0428666
Ppp2r1a	5.80828	5.48514	5.20072	6.30244	6.4344	5.06078	23.0018	21.1757	13.9264	21.1505	24.888	20.8412	20.145	19.7083	14.1913	17.9331	21.1088	18.3529	14.7237	12.3533	13.3403	14.9328	12.4044	10.1605
Fance	2.03042	1.50363	2.45544	2.21729	1.85344	2.15362	1.16323	1.11102	0.712489	1.32697	1.20877	1.5636	1.50301	1.35488	1.03885	1.21737	1.16263	1.33663	1.15856	0.758193	0.855311	1.20947	1.10412	0.883981
Tinf2	3.01661	3.7903	4.38528	3.31589	3.38142	4.24843	1.40513	1.23789	0.957101	1.74582	1.11963	1.55251	1.94067	2.09218	1.16258	2.01217	1.61777	1.89223	2.12069	2.12716	2.47468	2.47368	1.45735	1.72013
Tssk4	0.706526	0.459085	0.496402	0.281137	0.51025	0.443598	0.130515	0.229491	0.286628	0.164173	0.242162	0.223859	0.24197	0.355908	0.463917	0.302127	0.204111	0.14598	0.056329	0.196375	0.458779	0.205216	0.166524	0.0441407
Hapln4	0.0320993	0.101078	0.0526233	0.0383184	0.0649096	0.0384755	0.265647	0.243282	0.0911558	0.678753	0.573328	0.345797	0.967413	0.656496	0.373186	1.34519	1.62283	1.0794	0.232885	0.22483	0.47419	0.369831	0.688474	0.379026
Dus3l	4.5882	4.83155	5.23973	5.01628	5.2095	5.46399	6.27858	5.28365	4.91948	6.86888	6.12756	4.36124	6.11762	8.01094	5.45588	7.91159	5.97119	6.45884	4.3257	4.19475	4.85948	5.28326	4.51989	2.84425
Gtpbp3	0.579745	0.565059	0.466728	0.494334	0.690838	0.479815	0.53012	0.729704	0.411591	0.404141	0.574044	0.518266	0.588559	0.525678	0.386269	0.464837	0.622086	0.404276	0.242661	0.61232	0.250969	0.357831	0.358688	0.244485
Tgfbr1	27.3734	24.9661	32.7213	22.5769	22.5766	23.3451	0.611646	0.537162	0.83984	0.840809	0.674638	1.12525	0.456438	0.459089	0.349923	0.61686	0.433985	0.739557	0.193472	0.199347	0.199887	0.224507	0.171587	0.21899
Homer1	0.148709	0.161609	0.177303	0.111174	0.153393	0.158443	0.336224	0.388499	0.385335	0.408273	0.487733	0.527575	0.372712	0.442544	0.299113	0.366454	0.402272	0.417127	0.113172	0.186749	0.161305	0.122164	0.116169	0.116275
Rad51c	0.054577	0.0881328	0.0722666	0.0801858	0.0339578	0.0369025	0.0998881	0.0954558	0.021195	0.1475	0.12311	0.0478868	0.198417	0.242783	0.0635647	0.234581	0.164947	0.139656	0.135893	0.104552	0.0858721	0.0995849	0.114287	0.0991447
Gabrb2	0.00567913	0.00755067	0.0102413	0.0058755	0.0195229	0.0140683	0.0746114	0.0959846	0.0336888	0.150756	0.0929572	0.0831324	0.255181	0.27956	0.111476	0.323561	0.345852	0.2612	0.0412029	0.0609925	0.0361396	0.0596585	0.0562187	0.0377516
Cav1	0.0439964	0.0592057	0.0471601	0.0538671	0.0570303	0.0378615	1.76801	1.59543	0.796633	3.26108	2.52257	2.16178	3.46328	3.59687	1.57202	3.80234	2.63787	3.84245	0.358864	0.48726	0.479443	0.692691	0.826387	0.808119
Arpp19	3.1572	3.24614	3.02141	3.27095	2.89394	2.65677	4.90989	5.38888	5.84505	6.82675	6.63554	7.51832	4.36095	4.67103	4.10529	4.58166	4.11123	4.50574	2.39023	2.35112	2.08637	2.71104	2.44466	1.74939
Bcl2l1	0.770439	0.550524	0.578103	0.828014	0.679344	0.567292	0.648916	0.633314	0.640431	0.242305	0.472822	0.342196	0.519746	0.586025	0.801753	0.376239	0.488185	0.309715	0.662495	0.458296	0.528997	0.665705	0.526113	0.508967
Khsrp	2.34949	2.27153	1.87934	3.07115	3.10614	2.24932	2.8884	3.26029	2.46398	4.17238	3.30414	2.26563	4.57134	4.51461	2.49184	4.76786	4.15121	3.29962	4.56076	3.13579	3.25025	4.4539	4.11041	2.71022
Dio2	0.462176	0.610891	0.554234	0.367813	0.553831	0.540303	0.996061	1.08329	0.72376	2.12721	1.20014	1.1715	3.07777	3.31982	1.55968	3.98813	2.98194	3.3299	27.7901	29.1345	30.3251	40.1227	29.5409	37.333
Ccdc124	2.29034	2.20006	1.68964	1.87243	2.30167	1.91338	5.29861	3.42438	1.76071	3.72539	4.39607	2.44093	9.04189	7.59164	2.52201	4.67443	5.90685	3.46314	10.6905	7.50246	4.10112	7.18264	5.90858	2.91384
Cct4	10.5127	10.4419	9.43996	9.2507	9.47828	8.39342	9.52149	8.46345	5.06756	10.0236	9.70482	7.54773	11.1847	10.1255	4.86079	9.69355	7.56024	6.98664	6.26212	5.83091	4.68474	6.06184	4.36199	3.91944
0610009B22Rik	6.74652	9.03657	5.75352	7.40282	7.76288	6.37129	14.2049	13.3512	11.4179	15.4075	16.1139	12.1562	13.3964	13.3847	11.4419	11.6953	11.9895	11.4578	11.7518	14.2398	8.95707	10.8074	14.1103	8.19571
Cpt1c	0.092136	0.0967098	0.106991	0.0916557	0.14491	0.0981668	3.16119	3.27039	2.18525	4.16626	3.90944	2.5787	4.54912	4.33729	2.65302	4.4817	4.17895	3.83117	2.24534	2.0376	2.43134	2.35204	2.08383	1.90724
Twist2	0	0.00892961	0.00209202	0	0.0034406	0	0	0	0	0	0.00136074	0.00161729	0	0.00359982	0	0.00509309	0.00442386	0	0	0.00198622	0	0	0	0
Zfp655	2.14257	1.7714	2.8	1.94177	1.85022	2.86367	1.25414	1.13266	1.32324	1.47835	1.39033	1.58482	1.15421	1.16688	0.927688	1.15641	1.00446	1.29578	0.621274	0.753612	0.895327	0.831981	0.603834	0.626896
Rhoa	5.10815	4.77732	3.93902	5.36478	4.61437	3.97737	3.86172	3.5458	3.61504	3.18006	3.72165	3.94263	3.04327	3.0517	3.20068	2.5503	2.66643	2.82658	3.10313	3.09423	3.15074	3.42145	3.29835	2.60818
Zmiz1	2.74333	2.90736	2.68003	3.18027	3.09116	2.95584	2.03232	1.9312	1.53971	2.45771	2.08209	1.85199	2.10889	1.96338	1.64444	2.36247	2.1455	2.39381	1.4099	1.5013	2.05787	1.94579	1.39723	1.4469
Ankrd26	0.840858	0.753588	1.14181	0.766994	0.644367	0.749872	0.596379	0.692	0.776874	0.817454	0.625148	0.655236	0.565261	0.608143	0.561239	0.58983	0.503872	0.445828	0.228648	0.180679	0.137452	0.325267	0.178643	0.15699
Aldh16a1	1.72714	1.26842	1.40171	1.6603	1.59066	1.59195	0.287461	0.291611	0.17806	0.283713	0.319107	0.249236	0.427526	0.265318	0.161821	0.452159	0.311232	0.284426	0.295849	0.133083	0.213753	0.36507	0.27508	0.172006
Hnrnpa0	33.6965	28.022	25.5101	33.565	26.753	24.3723	45.7886	38.6614	22.1333	48.9892	43.3878	39.1333	67.4781	53.9781	28.232	62.0168	40.0674	48.8643	42.5665	43.0848	31.1777	45.3736	29.8482	33.6667
Prrg2	0.614301	0.6951	0.428544	0.582494	0.969099	0.783325	0.534073	0.554736	0.437155	0.654797	0.815328	0.380994	0.599821	0.543843	0.685562	0.534695	0.558835	0.65218	0.919087	0.579795	0.683211	0.876956	1.82217	0.73165
Hnrnph1	47.9353	29.358	51.4671	36.6014	27.4982	30.0404	23.1634	23.3735	18.6755	30.88	23.4515	24.0909	20.5946	20.9233	9.21745	23.9955	14.5934	14.1742	8.97068	11.5785	6.31512	11.8819	8.39796	6.87705
Ift43	0.0148712	0.0218532	0.0121899	0.00946796	0.0160383	0.00831843	0.218451	0.202877	0.163295	0.182869	0.225179	0.146068	0.188444	0.189829	0.148768	0.123158	0.142634	0.103241	0.250643	0.202535	0.179129	0.292283	0.187696	0.145681
Id3	0.421073	0.552469	0.215719	0.209439	0.17739	0.210297	1.33399	1.19675	0.531451	2.15745	1.37507	0.933903	6.41727	6.16188	2.16308	5.30429	7.05542	4.26304	128.131	106.911	105.506	115.934	94.4809	82.314
Tcap	0	0.072824	0.0853055	0.496931	0.0701482	0	0	0	0	0	0.0554865	0	0.142567	0.293578	0.0562751	0.20768	0.541172	0	0.11616	0.161983	0	0	0	0
Arid1a	5.52354	6.06404	6.21889	6.37718	7.1537	6.46684	3.48545	3.789	3.18769	4.13969	3.93585	3.25517	3.03173	3.0881	3.0893	3.08049	3.2868	3.13893	2.28253	2.37294	3.24892	2.59475	2.56321	2.59207
Crlf1	0.0108805	0.00761375	0.0178374	0	0.007334	0.00869452	0.602175	0.700943	0.302119	0.83534	0.400277	0.999755	0.208675	0.314609	0.158856	0.108564	0.295471	0.236051	0.327903	0.304837	0.288495	0.412949	0.242343	0.256952
Ctsd	195.437	188.508	162.255	187.005	290.024	187.889	13.5242	12.1665	9.27076	12.5805	15.2105	12.7374	16.7685	14.5281	9.96292	13.6314	14.2864	13.7845	38.0998	30.3402	28.0567	31.6888	31.4489	21.1126
Rplp1	68.0209	87.7927	35.0801	87.9663	77.5621	37.0671	37.6751	32.3641	16.5145	42.8426	47.9524	20.7738	54.3567	94.6766	17.2671	52.4112	67.4132	36.9609	94.9041	81.6845	49.5981	83.6845	64.2178	30.6566
Cabs1	0	0	0	0	0	0	0	0	0	0	0	0	0	0	0	0	0	0	0	0	0	0	0	0
Hmgcll1	0.000978211	0.000684514	0.00320734	0.00233547	0.00131872	0	0.030358	0.0185348	0.0160503	0.0528254	0.0354653	0.0272748	0.0663332	0.0758863	0.0243322	0.0722276	0.0757365	0.0594219	0.0163778	0.0296902	0.0296425	0.039115	0.0330853	0.0290905
Ttc9b	0.242476	0.412068	0.22715	0.330805	0.420276	0.22144	0.734588	0.525067	0.371617	0.901493	1.73604	0.285358	4.19959	3.93309	0.580662	2.76502	3.8027	1.12724	1.43055	1.10527	1.39081	1.05643	1.08586	0.39387
Phox2a	0	0	0	0	0	0	0	0	0	0	0.0143589	0	0	0	0	0.0268717	0	0	0	0.0209591	0	0	0	0
Abhd8	0.410409	0.634208	0.406496	0.843758	0.783803	0.409944	0.247659	0.324012	0.248205	0.456165	0.692919	0.249236	1.18302	1.91753	0.388371	1.48445	2.44046	0.766713	7.63481	6.4279	5.32439	8.24014	7.95616	5.14522
Ift22	2.14627	2.3732	1.54441	1.89061	2.3633	1.93763	3.20328	3.12917	2.44006	2.52635	3.37181	2.40867	4.53375	4.27517	2.89703	3.72724	5.11181	2.74876	7.71717	6.47728	7.59603	7.62833	8.16335	5.37383
Fzd3	0.0611095	0.0617674	0.0848766	0.0688963	0.0972561	0.0854562	2.37324	2.70815	2.98444	2.63186	2.32234	3.19907	2.48586	2.39428	2.14973	2.72183	2.54416	3.04311	1.22776	1.37654	1.38884	1.77513	1.51654	1.50551
1700008O03Rik	0.00922122	0.0129053	0.00755859	0.00733852	0.00932334	0.0221058	0.0143087	0.0104832	0.0174577	0.00299979	0.0196658	0.0146085	0.0347388	0.0227612	0.0199453	0.0230021	0.0426232	0.0133369	0	0.0215291	0.0314357	0.0281229	0.0304275	0.0120982
Mid1ip1	7.64874	5.90353	5.26983	7.32069	5.68661	4.81248	10.344	11.3052	8.83591	6.05114	7.96643	6.52161	14.4118	11.4336	10.7729	9.93913	8.19267	7.44241	33.9792	29.3674	23.1008	28.4851	26.8738	19.9146
Ap2s1	3.42872	3.30093	1.70957	4.27551	3.38573	1.6317	2.98213	2.8883	1.61937	3.16151	3.85992	1.92364	6.22284	7.30044	2.47405	5.24066	6.09463	3.44289	6.98376	4.65692	3.44126	5.95741	5.25157	2.24445
Fgfrl1	0.326909	0.366013	0.375152	0.403254	0.446215	0.293884	2.48984	2.90506	1.49569	2.39283	2.89769	1.86961	4.23766	4.91648	2.21851	3.26186	4.19322	2.5532	5.06281	4.783	3.99345	4.99611	5.7711	3.27395
4930432K21Rik	0.0483809	0.0440116	0.0515549	0.0308024	0.02935	0.0541251	0.0675659	0.0220009	0.0457975	0.031478	0.0593287	0.0919755	0.0364527	0.0511804	0.0706365	0.0289644	0.114611	0.0454833	0.0540016	0.0263565	0.0696385	0.055742	0.0718397	0.0423169
Fhl2	0.00482402	0.00337566	0.00131807	0.00895789	0.00650326	0.00770967	0.123926	0.154777	0.108579	0.192503	0.23491	0.18953	0.133271	0.107733	0.0878214	0.120334	0.175597	0.156984	0.0161533	0.00875994	0.00730905	0.0141674	0.0185709	0.00984521
Emc10	4.27289	6.05571	4.71429	6.58577	7.64392	5.44581	17.9606	17.9276	10.6835	17.1496	20.5227	13.0129	26.847	28.0109	17.7141	22.6664	27.1154	21.5647	23.9873	21.243	16.6085	20.8821	21.5209	13.2147
Clstn3	0.0382113	0.0559084	0.0455588	0.0331742	0.0796105	0.0555171	0.447393	0.431776	0.111801	0.872408	0.568592	0.25755	2.49121	2.24895	0.730703	2.54757	2.7718	1.86146	0.255903	0.240605	0.14737	0.21424	0.323814	0.215724
Fbxw9	1.96707	1.47059	1.36433	1.27109	1.58655	1.545	2.03488	1.27423	0.912447	1.40015	1.73003	1.26782	2.16498	2.41881	1.13641	1.94594	1.69025	1.79941	2.23312	2.02806	2.0506	2.42701	1.96942	1.45582
Spib	0.078215	0.13683	0.0961687	0.0155615	0.0527208	0.109377	0	0	0	0.0508888	0.0104254	0.024782	0.0133935	0.0413704	0	0	0.0112979	0.0141405	0	0	0.0296266	0.0265045	0	0
Fnbp4	5.43717	4.045	7.38614	4.76746	4.2177	6.82222	2.1657	2.36741	2.44667	2.89339	2.1062	2.69343	2.04136	2.04069	1.51242	2.17206	1.67189	2.05156	1.04186	1.46064	1.27536	1.64931	1.06426	1.08176
Cers4	0.0461198	0.0839095	0.0856895	0.048938	0.0497393	0.0663372	0.617047	0.594226	0.256122	1.01023	0.675393	0.592307	1.43419	1.21863	0.57526	1.54313	1.15295	1.22958	0.422118	0.36371	0.461194	0.512614	0.393139	0.33616
Scrn3	0.890757	0.623317	0.873088	0.791407	0.714779	0.760756	1.06529	1.17519	1.01124	0.785	0.819177	1.00349	0.768312	0.824304	0.769654	0.719495	0.634485	0.582812	0.378758	0.487826	0.442732	0.450376	0.431557	0.354516
Phax	0.9971	0.750391	0.778765	0.868382	0.802076	0.8757	1.26502	1.11574	0.854814	1.56677	1.29144	1.14747	1.54635	1.45615	0.854542	1.53458	1.26908	1.14622	1.22843	1.18228	0.922836	0.969026	0.935057	0.752824
Tle1	0.0836986	0.0397078	0.0686073	0.0496751	0.073629	0.0804862	0.383758	0.444049	0.410022	0.156909	0.316159	0.250811	0.337178	0.353166	0.497087	0.259034	0.267209	0.255447	0.471862	0.500126	0.566368	0.519181	0.535981	0.500047
1700109H08Rik	0.87347	0.916831	0.898782	1.12405	0.85809	1.06183	0.398922	0.37326	0.574675	0.465525	0.28735	0.44163	0.337334	0.294897	0.306508	0.445041	0.25234	0.456945	0.0933459	0.245875	0.197106	0.384157	0.260626	0.276337
Relt	0.351161	0.326063	0.431767	0.456817	0.382361	0.474878	0.824337	0.609066	0.447474	0.514069	0.6841	0.650464	0.370046	0.39053	0.4309	0.289741	0.327756	0.361384	0.512559	0.325844	0.516709	0.567523	0.46238	0.472533
Snrpb2	6.07923	6.08442	5.00297	5.61867	5.53435	4.79013	3.62671	3.34088	2.33853	3.45893	4.0225	3.7756	4.05618	3.75782	2.60627	3.61289	3.58247	3.36288	3.13592	3.52478	2.09171	3.13522	2.42756	1.95955
Ubc	14.8665	11.3451	9.38091	20.0684	14.653	10.3107	15.1469	12.9894	5.89458	11.7896	13.9832	6.18569	18.5214	25.3408	9.60124	16.0651	19.0917	11.1768	38.04	22.5064	23.1198	33.4393	27.7903	20.0935
Prpf31	3.72677	2.57458	2.6262	3.12476	2.8068	2.46903	4.17979	3.66757	2.43584	4.46597	4.22235	3.48217	4.17414	3.70774	2.15403	3.91773	2.97724	2.7088	4.32951	3.1001	2.45597	4.00126	3.11354	2.16202
Sertad1	0.593192	0.659265	0.743655	0.555388	0.470401	0.362482	0.270724	0.317353	0.132122	0.272433	0.465103	0.13267	0.38241	0.590603	0.150948	0.174082	0.624994	0.277571	0.89579	1.27632	0.634424	0.425675	0.287849	0.305201
Carhsp1	1.86479	1.54996	1.55727	2.12506	1.60514	1.67903	22.7912	21.8569	19.8898	11.1075	16.8275	17.4869	9.65473	8.33533	17.0382	3.78249	6.52036	7.895	8.96092	6.87476	7.30231	8.20602	6.08831	6.46298
Elk3	2.48435	2.67293	2.3804	2.82615	2.63129	2.54711	0.0684946	0.0664387	0.0423728	0.109215	0.0566821	0.0567317	0.185242	0.18152	0.0827015	0.169351	0.133628	0.130832	0.17279	0.134992	0.17662	0.213626	0.147706	0.151716
Herpud2	1.58598	1.53812	1.64788	1.34227	1.59529	1.87384	2.50601	2.30714	2.37425	2.05668	2.35692	2.24448	1.72359	1.83411	2.28156	1.63676	1.68025	1.7371	1.46659	1.60054	1.6013	1.49892	1.48112	1.34436
Rdh13	0.535068	0.406285	0.797865	0.534544	0.510299	0.791457	0.421024	0.517699	0.362809	0.599969	0.610014	0.649277	0.768087	0.85105	0.415534	0.77243	0.628178	0.646272	0.74336	0.841687	0.707208	0.590244	0.976703	0.622344
Adam21	0.012017	0	0.039401	0	0	0	0.00621562	0	0.015167	0.0156371	0.0192211	0.0304601	0.0493866	0.00847486	0.0194943	0.0479616	0.055546	0.0173804	0.0670651	0.0280564	0	0.0407215	0.148698	0.0210215
Nutf2	0.0380313	0.0487901	0.0415654	0.0353108	0.0469974	0.0151952	0.0295068	0.0528442	0.0720009	0.0742326	0.0777285	0.0281167	0.0303914	0.125166	0.0274202	0.120166	0.0476103	0.0870919	0.0353746	0.0591952	0.0432169	0.0300709	0.0313732	0.0166322
Fut1	0	0	0	0	0	0	0	0	0	0.0205108	0	0	0	0	0	0	0.072858	0	0.175935	0	0	0	0.0260056	0
Arpc5	23.2445	23.7326	19.3009	26.0611	20.525	18.7633	19.5721	18.592	17.8578	18.676	18.8872	19.612	15.9575	15.8654	15.5999	13.8818	12.3005	13.3926	5.80136	7.08888	5.64771	7.12515	5.50027	4.37388
Rnf151	0	0	0	0	0.108061	0.128107	0.0276405	0	0	0	0.0284917	0	0.0366032	0.0753745	0.0288966	0.0533206	0.0308762	0	0	0	0	0	0	0.0467407
Elavl2	0.00554541	0.00388047	0.00779237	0.0044132	0.00694179	0.00633042	0.0344195	0.0480331	0.0279963	0.0561817	0.0684248	0.049197	0.0949592	0.104476	0.0394108	0.0932732	0.111227	0.061872	0.0468645	0.0505551	0.036609	0.0612068	0.0352897	0.0540468
Pou2f2	1.07678	1.08298	1.09038	1.20811	1.15158	1.1339	0.0312746	0.0292509	0.0259794	0.0518952	0.037725	0.0301635	0.0678512	0.0626024	0.0500873	0.0962728	0.0817644	0.0651233	0.00430782	0.00200239	0.00584759	0.00523135	0.00636756	0.0033757
Mgst1	0.0144592	0.0657671	0.0770391	0.0863032	0.0877162	0.0635485	0.0149577	0.0164381	0.00456238	0.0987796	0.223566	0.0733014	0.0297119	0.0305918	0.0273656	0.0721364	0.150379	0.125476	2.71136	2.82446	2.88087	3.01335	3.03565	2.93409
Nfib	0.0100094	0.0128076	0.00984557	0.0113797	0.0146502	0.0132545	0.176765	0.180334	0.167119	0.211187	0.166352	0.152047	0.325366	0.292849	0.220212	0.346701	0.276111	0.319317	0.491578	0.333401	0.453451	0.600454	0.375342	0.443744
Htr3b	0	0	0	0	0	0	0	0	0	0	0	0	0	0	0	0	0	0	0	0	0	0	0	0
Rab25	0.0379039	0.0397855	0.108744	0.0904952	0.0383237	0.136299	0.00980266	0	0	0	0	0.036029	0	0.0133657	0	0.0567302	0	0	0	0	0	0.0642219	0	0
Ubqln4	2.26277	1.84904	1.9219	1.9548	2.08213	1.62973	2.69113	3.18736	1.69101	3.38999	3.49231	2.33008	4.78736	4.75066	1.98429	3.59461	4.21895	3.03586	3.14045	3.49881	2.8307	3.48077	3.03942	2.01822
Rbfox1	0.00576261	0.00817389	0.00746837	0.00718895	0.00671877	0.00578719	0.00422928	0.00714148	0.00348917	0.00668796	0.0092173	0.0075995	0.0176021	0.0262515	0.00686383	0.023388	0.0321258	0.0149234	0.0039114	0.0027878	0.00224178	0.00253331	0.00591008	0.00313318
Rps18	7.86973	7.06549	5.84221	7.56282	6.30545	6.69206	4.66957	4.1639	2.00527	5.62263	5.73172	4.14012	7.18045	7.058	2.3606	6.13371	5.90256	5.54075	6.09907	5.13077	5.28693	6.01789	4.75263	2.75334
Rpl10	5.47426	9.66619	11.9939	5.33375	8.69029	9.1577	2.38163	2.59795	1.61431	3.39527	2.07309	2.20459	2.48807	1.37108	1.38326	2.45031	2.15791	1.88689	1.88446	2.03061	1.58909	1.52564	2.23684	1.56621
Rps15a	4.50607	4.88461	3.51222	4.97887	4.26445	4.19554	3.19432	3.01115	1.70745	4.37149	3.98448	3.45459	5.12574	5.3201	2.39312	5.12838	4.33538	4.68426	3.82831	3.27982	3.26888	3.44929	3.05342	2.16419
Ncaph2	1.75767	1.6529	1.68562	1.96828	1.50787	1.51557	1.11396	1.22684	0.640097	1.09387	1.23716	0.823257	1.99386	1.83733	0.833991	1.8647	1.59359	1.33137	2.14797	1.31924	1.5526	1.96342	1.23218	1.17277
Hipk1	6.04711	5.08491	5.787	5.85246	5.443	5.85443	1.97313	2.01219	1.92619	2.42969	1.91145	2.04771	2.07809	2.01329	1.83181	2.28013	2.20014	2.27537	2.23792	2.42009	2.92996	2.85467	2.39476	2.73197
Gprc5b	0.0923527	0.157972	0.0883179	0.102079	0.162543	0.122997	2.11773	2.39537	3.18278	1.07156	2.02702	1.33302	3.23668	3.34701	4.94675	1.89928	2.80438	2.33751	11.4134	12.2663	13.0987	10.7586	15.0846	11.2011
Man1a2	2.67876	2.36959	2.59399	2.50926	2.27018	2.18987	1.7914	1.83884	1.74219	2.0182	1.93599	2.4586	1.08413	0.923173	0.961164	1.20898	1.08159	1.33281	0.328154	0.313572	0.258506	0.343629	0.310119	0.338088
Ceacam5	0	0	0	0	0	0	0	0	0	0	0	0	0	0	0	0	0	0	0	0	0	0	0	0
Tppp2	0	0	0	0	0	0	0	0	0	0	0	0	0	0	0	0	0	0	0	0	0.158304	0	0.0861901	0
Acyp1	0.363063	0.456267	0.279381	0.365593	0.394553	0.248675	0.643851	0.758115	0.720084	0.800252	1.02317	0.680818	0.740973	0.637506	0.765264	0.746701	0.70638	0.551898	1.12475	0.95145	0.572544	0.863722	0.971856	0.654557
Cldn13	0	0	0	0	0	0	0.0481382	0	0	0	0	0	0	0	0	0	0	0	0	0	0	0	0	0
Cd163	10.3683	7.19107	8.86037	8.9095	6.49953	6.98575	0.0142567	0.0348171	0.0173942	0.0418445	0.0367394	0.0291108	0.0471989	0.0194387	0.0223569	0.0320859	0.0265427	0.102985	0.0410204	0.050052	0.0139206	0.0280207	0.0416858	0.0522349
Hdac5	1.55652	1.34753	1.51851	1.36048	1.9459	1.68232	2.02133	1.89558	1.68119	1.18799	1.82468	1.57648	1.68579	2.12039	2.48907	0.882734	1.76985	1.56576	1.64083	1.58925	1.78136	1.75367	2.32661	1.34106
Rala	0.823205	0.813781	0.697729	0.771005	0.700837	0.598151	1.21655	1.31149	1.24868	1.33232	1.31572	1.53422	0.969175	0.962333	0.878173	0.851187	0.692425	0.840993	0.587558	0.549132	0.397373	0.540203	0.40191	0.40981
Clec3a	0	0	0	0	0	0	0	0	0	0	0	0	0	0.0216022	0	0	0	0	0	0	0	0	0	0
Vdac3	0.717148	0.685672	0.646045	0.615933	0.732269	0.743285	1.06506	1.05477	0.824482	1.32587	1.23036	0.949394	1.04566	1.08163	0.57593	1.02021	0.914871	0.816431	1.13333	0.928351	0.731557	0.837328	0.890326	0.608629
Slc1a7	0	0	0	0	0	0	0.00136001	0	0	0	0	0.00333242	0.00180101	0.00741738	0.00568727	0	0.00455766	0	0	0	0.00199193	0	0.00216906	0.00689943
Vps72	1.74878	1.85979	1.45776	1.77701	2.0645	1.01847	1.46156	1.87953	1.02254	2.12776	2.2862	0.838963	2.46335	2.79411	0.983038	2.53357	2.5232	1.75765	3.80463	2.32212	1.89367	3.51544	2.68148	1.27898
Gabpa	4.30017	3.57978	4.03802	4.4482	3.42048	3.26837	2.1539	2.39751	1.82473	3.20247	2.55184	2.35694	2.40938	2.5185	1.54128	3.08648	2.16568	2.53781	1.59991	1.34632	1.50402	1.85358	1.32856	1.71127
Bmp7	0.0115053	0.0103512	0.0148198	0.0143884	0.0221575	0.00656698	0.56194	0.473366	0.125505	1.07579	0.616927	0.319752	1.89247	1.75378	0.844332	2.05325	1.44253	1.69256	0.550367	0.83655	0.739617	0.932359	0.958597	0.943065
Dynll1	4.67568	7.61295	4.13323	4.4993	7.7658	3.27231	36.5294	40.7643	18.8611	38.7523	58.1191	32.1662	34.4336	47.6734	17.3183	23.2047	38.422	23.1827	31.1427	32.0834	17.9654	20.7944	26.546	11.5739
Pdcl	2.09248	1.76966	1.75729	1.97175	1.99884	1.23098	2.20446	2.19886	2.0091	2.88154	2.5119	2.21268	1.74981	1.39422	1.44387	2.36965	2.00265	1.80099	1.81974	1.39868	1.28372	1.60955	1.38728	1.76284
Tmem184b	1.33023	1.4079	1.59014	1.29903	1.84745	1.78491	0.580537	0.623816	0.424979	0.701403	0.762427	0.521577	1.16931	1.27821	0.803233	1.19456	1.20573	1.09624	1.13214	1.03093	1.10432	1.27906	1.41512	0.848385
Gm5965	0	0	0	0	0	0	0	0	0	0	0	0	0	0	0	0	0	0	0	0	0	0	0	0
Rsph14	0	0	0	0	0	0	0	0	0.00299569	0	0	0	0	0	0	0	0	0	0.00883082	0.00246289	0.0251733	0.00857922	0.0065266	0
Nf2	0.866247	0.83174	0.861382	0.915413	0.807879	0.770511	0.975439	0.895468	0.870177	1.07454	0.87298	0.828797	0.882232	0.834248	0.877707	0.735391	0.744196	0.788693	0.908237	1.06759	0.869251	1.07119	1.04729	0.729104
Cabp7	0.0721309	0.0084124	0.0295627	0.0382693	0.0810331	0.0576393	0.149235	0.191339	0.0151732	0.109504	0.160241	0.0990354	0.551707	0.576524	0.292532	0.455819	1.0558	0.486848	0.0670923	0.187118	0.0455368	0.040738	0.158675	0.0736051
Zmat5	0.10447	0.121	0.0354347	0.126144	0.111698	0.0575734	0.154655	0.161088	0.0977552	0.159381	0.240087	0.100444	0.251686	0.243896	0.122723	0.330691	0.301808	0.205806	0.317654	0.350446	0.292012	0.29542	0.368498	0.226865
Ewsr1	4.37587	3.46416	5.42808	4.17318	3.1879	4.68478	2.59591	3.14291	2.58397	3.04314	2.93508	2.5998	3.0716	2.67798	1.70351	2.91481	2.37741	2.22878	1.98689	1.9107	1.85994	2.26306	1.72369	1.41287
Ap1b1	4.25768	3.81299	4.05571	4.66601	4.37426	3.77051	0.617284	0.581006	0.399348	0.78062	0.732531	0.522116	1.09817	1.05581	0.483428	0.938645	1.1337	0.921393	1.306	1.10395	1.08589	1.19884	1.07383	0.878536
Derl3	0.235063	0.164488	0.269752	0.0748279	0.0633776	0.112702	0.413383	0.285048	0.296681	0.305877	0.701834	0.476662	0.644031	0.895191	0.508435	0.703629	0.842061	0.645955	0.262371	0.109762	0.676689	0.509792	0.349039	0.49344
Gstt4	0	0	0	0	0	0	0	0	0	0	0	0	0	0	0	0	0	0	0	0	0	0	0	0
Tbx1	0	0.00858079	0	0	0	0	0	0	0	0	0	0	0.0167985	0.008648	0	0.0122353	0.0141702	0	0.0273741	0	0	0	0	0
Gnat2	0.0275015	0.0192445	0.0112714	0.0328298	0.00926869	0	0	0	0	0.00894661	0	0	0.028256	0.0193952	0.00743563	0	0	0.019888	0.061393	0	0.0520857	0.027958	0.0226869	0.0360817
Bcl2l13	0.463806	0.478753	0.352655	0.414206	0.497942	0.454475	0.826074	0.784163	0.554925	1.14288	0.876131	0.659633	1.31819	1.16334	0.641186	1.32133	1.08405	1.30975	0.850322	0.744774	0.852179	0.989949	0.863899	0.831538
2610028H24Rik	0	0	0	0	0	0	0	0	0	0	0	0	0	0	0	0	0	0	0.0110279	0	0.0149697	0.00669608	0	0.0259252
Spatc1l	0	0.0104887	0	0	0	0	0.0232586	0	0.00945907	0	0.0159833	0	0	0.0105709	0	0.0149559	0	0	0	0.0116651	0	0	0	0
Dqx1	0.376339	0.421355	0.329048	0.459235	0.338228	0.340826	0.00648854	0.0380305	0.0395825	0.0897806	0.0133767	0.0158988	0.0257776	0.044235	0.0203503	0.0375507	0.0289925	0.0635024	0.028004	0.0585766	0.00950341	0.0170038	0.0103485	0.0329168
Ccl8	10.8244	14.4276	4.40618	13.7127	8.83485	5.76647	0	0	0	0	0	0.0466621	0	0	0	0	0	0.266252	0	0	0.167352	0	0	0
Lnpk	0.379789	0.367004	0.469437	0.361417	0.303403	0.428734	0.437575	0.461464	0.575721	0.495509	0.37284	0.476243	0.353734	0.362792	0.321635	0.396994	0.276328	0.276101	0.130089	0.10165	0.0822045	0.151169	0.129298	0.117759
Prr29	0	0	0	0	0.0265131	0	0	0	0.00620561	0	0	0	0	0	0	0	0	0	0.0109759	0	0.00744955	0.013329	0.0162239	0
Mymk	0.529815	0.741488	0.702251	0.950939	0.942194	0.261229	0.244887	0.205047	0.106707	0.139352	0.204347	0.242875	0.0231639	0.00794996	0.0243825	0.089982	0.104211	0.0815195	0.0629113	0.114047	0.0341593	0.0305595	0.0278975	0.039439
Fam163b	0.136943	0.0984171	0.118319	0.167893	0.249476	0.21886	0.132092	0.196359	0.179847	0.228767	0.518986	0.349462	0.760539	1.2007	0.368253	1.07835	2.47636	0.920726	0.21895	0.365811	0.333661	0.183113	0.44882	0.265455
Trpm5	0.00466271	0.00326278	0.00764399	0	0.00628579	0	0.0409993	0.031805	0.0353098	0.0303368	0.03729	0.00295471	0.0287438	0.00328834	0.0529479	0.0139572	0.0107762	0.0236032	0.0364308	0.0108862	0.0353232	0.0347608	0.0307713	0.0163131
Ascl2	0.390465	0.444002	0.0400077	0.310743	0.328991	0.195011	0.0757361	0.147968	0.154006	0.0635118	0.104091	0.185575	0.167157	0.172108	0.158356	0	0.141003	0.0352961	0.0544784	0	0	0.132316	0.0402634	0.0426905
Rarres2	0.115274	0	0.0314966	0.122318	0.129501	0.214934	0.0794988	0.0291223	0.0969945	0.175001	0.245841	0.0243494	0.184235	0.135494	0	0.383398	0.222013	0.111149	11.7086	7.74509	5.12325	9.86982	7.89275	4.77242
Pttg1ip	11.7087	12.4953	12.7758	11.7311	13.0439	12.784	7.0788	6.81972	4.79227	7.99074	6.74182	6.72023	9.71871	8.63193	6.40319	10.463	7.82675	9.18468	17.2096	14.8917	19.4021	16.2401	16.4708	16.2111
Trpm2	0.739477	0.602156	0.948749	0.623115	0.689663	1.19844	0.0107604	0.00860031	0.00477402	0.0172269	0.023192	0.00838924	0.058294	0.0360122	0.0194309	0.0792567	0.0644715	0.0355595	0.0189986	0.0029437	0.00573099	0.0166629	0.0187218	0.00992518
Ube2g2	1.2928	1.02387	0.866657	1.42763	1.02678	1.10915	0.868255	0.964631	0.54706	0.779189	0.753399	0.885918	0.967888	0.78452	0.536499	0.739969	0.917783	0.815324	0.687939	0.651246	0.660517	0.672415	0.826725	0.416367
Mpo	0	0	0.0359745	0.00873177	0	0	0	0	0	0	0	0	0.00751529	0.00773785	0.00593299	0.0218953	0	0	0	0	0	0	0.0452554	0.00959669
Lpo	0	0.00380426	0	0	0.00732897	0.00434428	0.134975	0.152454	0.0857703	0.159172	0.0956528	0.110242	0.372378	0.329729	0.161687	0.509903	0.332962	0.444257	0.709968	0.554253	0.267705	0.75901	0.811741	0.470756
Met	0.01618	0.0241539	0.0185678	0.0266115	0.0210852	0.0181011	0.00836891	0.00899281	0.00340357	0.00842174	0.00747643	0.00615187	0.0251206	0.0296682	0.0116657	0.0355174	0.0504825	0.0288619	0.0433434	0.0176288	0.0261493	0.0190073	0.0409321	0.0990642
Slc16a12	0.0120526	0.0147594	0.00740959	0.0107908	0.0152326	0.00481557	0.0116889	0.0159858	0.00285225	0.022545	0.0224912	0.0143205	0.0381818	0.07225	0.0146641	0.0511103	0.0356897	0.0315954	0.0016816	0.00351745	0.00114133	0.0071474	0	0.00131774
Syn2	0.0444354	0.0310942	0.0397347	0.0327911	0.0615371	0.029052	0.263267	0.239419	0.109108	0.38688	0.342449	0.188404	0.696162	0.668918	0.257757	0.759375	0.831844	0.53576	0.420228	0.368451	0.285216	0.325246	0.385223	0.214822
Elk1	0.448795	0.357533	0.28864	0.357164	0.502632	0.253798	0.910677	1.0466	0.766872	1.01975	1.18169	0.765683	1.56067	1.78706	0.832589	1.6052	1.87101	1.34813	1.6184	1.53679	1.93534	1.78754	1.40116	1.5279
Nav1	0.406902	0.43727	0.514905	0.476037	0.490404	0.536052	3.1189	2.98338	2.78911	3.49654	2.98326	3.09627	2.45541	2.39192	2.47001	2.37193	2.43391	2.68932	0.420686	0.369933	0.411245	0.493719	0.374338	0.33499
Tnpo1	2.07999	1.99809	2.67396	1.80255	1.81831	2.01213	1.31016	1.22795	0.952053	1.8277	1.33745	1.33962	1.76387	1.68659	0.965849	2.04553	1.28353	1.87111	0.684798	0.693442	0.779107	0.814092	0.760854	0.766264
Myod1	0	0	0	0	0	0	0	0	0	0	0	0	0	0.19158	0	0	0	0	0	0	0	0	0.0373491	0
Otog	0	0	0	0	0	0	0.000872606	0.00383587	0.00319393	0.00219528	0.000899479	0	0.00346667	0	0.00364905	0.00673329	0	0.00366003	0	0	0.0178928	0	0	0
Rnmt	2.43546	1.98263	2.2429	2.02316	1.85745	2.12062	2.0853	1.80908	1.68084	2.57257	2.04347	2.22584	1.77785	1.51572	1.13332	2.30422	1.26983	1.47354	1.02888	1.18178	0.904138	1.32837	0.820446	0.971746
Kcnq1	0	0	0	0.000884831	0.000249811	0	0	0.00140444	0.000233881	0	0.000395195	0.000469705	0.000507706	0.000261371	0	0.000739585	0.000428269	0.000536023	0.000413667	0.000288426	0	0.000251176	0	0
Srp14	12.8667	12.5361	8.78057	13.7673	13.0714	9.34698	22.6084	19.9467	14.938	19.8471	25.0771	15.9949	23.3401	24.3352	16.0124	18.1517	20.5063	19.2549	24.6344	19.1405	17.2329	19.5683	18.1812	11.9002
6330409D20Rik	0.127398	0.188201	0.208854	0.191508	0.190827	0.271473	0.00732164	0	0.0267988	0.0184196	0	0.0358802	0.0193915	0.0399316	0.0229631	0.0564959	0.032715	0.0307096	0.0157998	0	0	0.0479676	0.0350314	0.0123811
Cdk9	8.05139	6.14728	8.14941	8.17156	6.22901	7.87946	1.97265	1.79113	1.10054	2.12083	2.07685	1.27036	2.33321	2.11495	1.04878	1.98401	1.45963	1.52044	3.69294	3.12029	2.11136	2.81672	2.52767	1.88173
Tor2a	3.89042	4.36575	3.83064	4.96511	4.79696	3.48793	1.7546	1.83387	1.00301	2.62382	2.66869	1.59344	5.41079	4.55051	1.74455	5.13632	4.9891	3.89416	5.5339	5.50155	4.83423	5.70743	4.44219	3.67253
Fpgs	0.149001	0.169914	0.144753	0.188849	0.182269	0.141115	0.165555	0.129659	0.0557214	0.147212	0.223616	0.111906	0.223019	0.315246	0.143238	0.24228	0.232764	0.195549	0.264866	0.30493	0.217396	0.306689	0.250384	0.173767
Mrtfb	0.374886	0.393496	0.48211	0.397011	0.471559	0.49417	0.32063	0.36355	0.335774	0.448451	0.487494	0.390012	0.707158	0.912338	0.470479	0.800394	1.14399	0.776485	0.322889	0.308982	0.353325	0.361604	0.438315	0.402772
Cbx5	1.87115	1.62292	1.96363	2.36104	1.6529	1.69393	4.30047	4.29739	3.32806	5.79718	4.85954	4.0502	4.6477	5.02148	3.00349	5.59122	4.343	4.14667	4.3447	4.94154	4.5622	5.23109	4.12906	3.78792
Odam	0	0	0	0	0	0	0	0	0	0	0	0	0	0	0	0	0	0	0	0	0	0	0	0
Apobec3	6.96999	5.49129	7.96322	7.72357	5.65955	9.27495	0.139439	0.130022	0.136101	0.235992	0.177707	0.226742	0.292089	0.22469	0.196135	0.361912	0.232228	0.510423	0.486917	0.42342	0.783497	0.574696	0.75208	0.840288
St6galnac1	0	0	0	0	0	0	0	0	0	0	0	0	0	0	0	0	0	0	0	0	0	0	0	0
Taf7l	0	0	0	0.00577709	0.00489307	0	0	0	0.00458105	0	0.00387037	0.0230004	0.00497224	0	0.00785074	0.0289726	0.0125828	0.0472462	0.0243076	0	0.0109987	0	0	0.0126987
Sardh	0.0832711	0.0971165	0.0715072	0.118339	0.168387	0.095059	0.02051	0.0375664	0.0125118	0.0245093	0.026427	0.0113074	0.0624692	0.0377526	0.0300189	0.0415435	0.0652962	0.0544833	0.967072	0.67274	0.817083	1.05884	0.868476	0.664176
Vav2	1.26609	0.849153	1.18666	1.07412	0.951039	1.07852	0.149461	0.12889	0.0636646	0.25083	0.152143	0.122835	0.281834	0.170754	0.106767	0.22433	0.162794	0.218866	0.124669	0.0813163	0.103176	0.0996284	0.105811	0.0611371
Tex15	0	0.00241604	0.00141507	0.00137387	0	0.005518	0.00535754	0.00785038	0.00871547	0.0078624	0.00644296	0.0120336	0.0248318	0.0219147	0.0121355	0.0327278	0.0239389	0.0312104	0.00192689	0.00134351	0.00653908	0.00350998	0.00142411	0.00905973
Ppp2cb	1.78128	2.09004	1.64692	1.93785	1.97282	1.75409	3.24796	2.76826	2.50937	3.89047	3.73172	3.53455	3.44667	3.38379	2.77289	3.44696	2.70295	3.42639	2.26938	2.12841	2.03552	2.08522	1.78608	1.96194
G0s2	0.22509	0.630038	0.461264	0.537401	0.834472	0.359736	11.1186	6.82389	1.70457	11.5695	13.8612	4.99231	31.6834	29.7643	6.14667	15.7215	28.2868	14.1616	10.0496	6.83183	6.47981	6.17833	6.77748	4.92194
Dmap1	4.03882	3.0672	3.36193	4.58461	3.87251	3.84034	4.24283	3.8441	2.21288	5.09257	3.6724	3.24384	7.14122	5.21092	2.77651	6.91954	4.73047	3.63391	5.64377	3.7767	3.90169	4.95462	4.33902	2.39614
Pla2g12b	0	0	0	0	0	0	0	0	0	0.00422175	0.00345958	0.0123355	0	0	0	0	0	0	0	0	0	0	0	0
Mcu	0.0385169	0.061256	0.0464971	0.0473726	0.0481483	0.0453284	0.10251	0.0769611	0.0640815	0.134414	0.102306	0.0763297	0.141026	0.152117	0.0916421	0.16351	0.16347	0.152943	0.118031	0.0986467	0.113003	0.139539	0.123051	0.128631
Oit3	0.00631497	0.00441897	0.00517635	0	0	0	0.0130653	0.00478615	0.00398517	0.00410869	0.0269354	0.00800346	0.0259529	0.00890716	0.00682956	0.00630101	0	0.00456674	0	0.0245729	0.00478402	0.0171195	0.0312565	0
Tex11	0.00268863	0.00413908	0.00264463	0.00299557	0.00724908	0.00429693	0	0	0	0	0.000286698	0	0	0	0	0	0	0	0	0.00167393	0.000814729	0	0.000443588	0
Bcr	0.101327	0.108364	0.110482	0.09205	0.129511	0.094719	0.199751	0.23546	0.121252	0.269301	0.242599	0.190812	0.436724	0.42067	0.215032	0.474992	0.556181	0.373291	0.554822	0.601098	0.713307	0.759934	0.727844	0.550989
Fxyd5	0.91337	0.843666	1.06812	1.36655	1.19027	1.51812	0.0566915	0.0830698	0	0.0475411	0.0779165	0.0540207	0.191857	0.214716	0.0395119	0.218724	0.161838	0.176137	0.0543723	0.530749	0.147614	0.0495217	0	0.0532592
Kcnd1	6.66665	8.56562	7.26179	6.95573	9.14261	6.98424	0.645824	0.563288	0.337694	1.02998	0.863843	0.59342	1.76648	1.7821	0.912289	2.04674	1.94528	1.90263	1.59275	1.42866	1.91433	1.80326	1.77187	1.45614
Tfcp2	0.250919	0.2988	0.303103	0.227716	0.301174	0.265585	0.432616	0.495451	0.372255	0.412434	0.484666	0.408671	0.404043	0.433083	0.324925	0.404097	0.36626	0.37246	0.351316	0.303192	0.316814	0.39829	0.350433	0.202143
Pou6f2	0	0.000300682	0	0	0.000579268	0.000686727	0.0037783	0.00423366	0.00135582	0.00475268	0.00389466	0.00217833	0.00588641	0.00696985	0.00325295	0.0111473	0.00546196	0.00870062	0.00239806	0.00100322	0	0.000873651	0.000354467	0.00075167
Pou6f1	1.40212	1.36552	1.53241	1.43411	1.41278	1.75186	1.50778	1.40229	0.711515	2.48285	1.68009	1.36482	3.90097	3.82961	1.83163	4.09129	3.77224	4.14991	2.03828	1.8299	2.58068	2.53077	2.34113	2.32211
Ubp1	2.66886	2.11921	3.35833	2.36926	2.13657	3.05018	1.21436	1.33552	1.29681	1.67794	1.34762	1.37056	1.25624	1.40213	0.870901	1.5378	1.23185	1.19256	0.625027	0.797625	0.659678	0.985339	0.741645	0.640316
Nuak2	0.403871	0.531697	0.830434	0.63193	0.507546	0.842381	0.00354063	0	0.00431984	0.00890745	0.010949	0.0260267	0	0.00482758	0	0.00683015	0.0118653	0.00495024	0.0764053	0.00532729	0.0155573	0.0139178	0.0338813	0.0239492
Ick	0.544038	0.577654	0.512527	0.523162	0.644287	0.508702	9.95343	9.32179	11.8912	8.56647	8.44808	10.5628	3.92827	3.81414	9.21984	2.29951	3.10518	4.2348	0.712665	0.787983	0.868655	0.769432	0.721499	0.5502
Sdhb	2.23294	2.76909	1.8574	2.56566	2.86773	2.09579	4.74626	4.01559	2.48475	5.23957	5.19183	3.76354	5.57486	6.13132	3.41514	4.8515	4.78276	4.16114	7.28532	5.59891	4.52929	5.98171	5.66231	3.52476
Cox4i2	0.0109396	0.0306204	0.0358685	0.113179	0.0221215	0.0174835	0.0169751	0	0	0	0.00583262	0	0.0224794	0.0617205	0	0.0764079	0.0695283	0.0870219	0.463999	0.340547	0.497249	0.34105	0.559514	0.459284
Snap47	0.283279	0.302061	0.199031	0.352119	0.338244	0.217743	1.52523	1.40883	0.880221	1.54644	1.90736	0.974489	2.53538	2.43351	1.22837	2.48465	2.57983	1.77347	1.49964	1.20308	1.35915	1.32929	1.51339	1.18459
Wnt3a	0	0	0	0	0	0	0.001439	0	0	0	0	0	0	0	0	0.00277593	0	0	0	0	0	0	0	0
Kdsr	0.611369	0.576064	0.76907	0.573257	0.685462	0.769088	1.33377	1.33273	1.22239	1.2012	1.24091	1.16034	1.03239	1.04803	1.09161	1.02072	0.972288	1.04839	1.07764	1.12353	0.97675	1.05843	1.33325	0.870938
Vps4b	3.09338	2.60519	3.52005	2.76591	2.43833	2.78307	1.13507	1.02882	1.27004	1.11287	0.952706	1.26147	0.775244	0.728905	0.779294	0.893282	0.559325	0.765848	0.503696	0.44183	0.424578	0.485892	0.342245	0.350144
Rps25	1.37354	1.41644	1.62957	1.32323	1.46185	1.76192	0.635664	0.602694	0.501831	1.10532	1.13704	0.710064	0.519926	0.943189	0.742735	0.865584	0.939809	0.914875	1.21035	1.26586	1.09532	1.07788	1.19272	0.758769
Nxf2	0	0	0	0	0.0118809	0	0.0182339	0.017812	0.0148311	0	0.0187954	0.0297855	0	0	0.00635418	0.00586242	0.0101842	0.00424886	0	0	0	0	0.00969362	0.00513899
Taz	9.28971	9.0241	9.97955	9.18388	7.69103	8.76046	4.0141	3.78275	3.39548	4.42987	3.83009	3.77523	3.70519	3.5199	2.64428	4.08765	3.42552	3.04603	3.46168	3.42398	3.56251	3.82254	3.09391	2.48555
Kif19a	0.0796975	0.0820136	0.103756	0.156699	0.15168	0.0786705	4.78666	4.36679	2.91412	4.01711	5.29401	3.6927	0.892697	1.26959	1.50075	0.608104	1.76337	1.68834	0.444782	0.569162	0.45815	0.578264	0.444746	0.299335
Aldh3a2	1.78081	1.98061	1.77821	1.98197	1.99514	1.82191	2.34463	2.26584	2.2919	2.26638	2.40964	2.4724	2.08287	1.84009	2.40595	1.78226	1.81622	1.94733	1.26791	1.69459	1.37157	1.61288	1.33105	1.29329
Zmynd10	0.0295568	0.062048	0	0.0705664	0.0398454	0	0.0305757	0.0224012	0.0186523	0	0.0787934	0	0.0404902	0.0833787	0.0319652	0.235931	0.290318	0.14962	1.15467	0.460047	1.11956	1.18187	0.902146	0.439486
Tmem115	1.50822	1.88212	1.7514	1.92046	2.81264	1.58686	3.36746	3.56262	1.85599	3.05835	4.2619	2.32564	5.75073	6.52378	3.13991	5.16677	4.9381	3.94465	7.32295	6.53394	7.6172	7.42778	7.40286	4.35329
Hyal2	1.15553	2.21934	1.4107	1.38919	2.65153	0.923377	2.63235	2.29195	0.837826	4.41495	3.34262	1.075	4.32793	5.54846	1.34276	5.02895	4.54571	3.32476	3.34793	3.3484	2.58893	3.09925	3.85351	2.25794
Ifrd2	0.496665	0.52132	0.424077	0.642298	0.57191	0.347271	0.781384	0.674428	0.352608	0.740538	0.639945	0.681918	0.524466	1.25513	0.414043	0.578161	0.597847	0.64351	1.06253	1.27232	0.517354	0.925668	1.53643	0.398212
Hyal1	0.12424	0.260814	0.611032	0.197747	0.26798	0.734665	0.347012	0.225989	0.313615	0.210168	0.251714	0.220442	0.357415	0.280381	0.524018	0.123965	0.358921	0.37735	2.05236	1.70172	2.97419	2.2566	1.78331	2.02122
Tusc2	3.3695	3.11469	2.0459	2.51602	2.74789	2.49309	4.38935	3.84641	1.91637	4.24925	5.56695	3.26873	7.83568	8.47845	3.9365	6.97315	8.48444	7.55073	4.73601	4.59711	4.15984	4.68002	5.18174	3.45656
Nprl2	3.48347	4.01486	2.93936	2.58199	3.59111	2.45613	3.56823	3.57195	1.85347	3.82184	4.73421	3.76563	6.92415	6.02129	3.0471	5.48626	5.52507	4.98882	5.33669	6.11301	4.08781	4.97633	5.09927	2.77801
Slc38a3	0.0817644	0.0792216	0.0927995	0.0750814	0.122945	0.120623	1.81854	1.53494	0.448513	3.36785	1.91478	0.797127	9.44763	9.01328	2.82627	11.0326	8.16567	7.1182	26.677	25.0076	22.485	31.4158	27.9295	18.5062
Cacna2d2	0.00458054	0.00705163	0.00600744	0.00947786	0.0172901	0.0102488	0.165372	0.141642	0.0398908	0.248551	0.161185	0.102173	0.59612	0.422535	0.218463	0.702016	0.553135	0.475008	0.337437	0.420644	0.431677	0.343346	0.383154	0.34295
Rassf1	0.310655	0.39595	0.636606	0.185421	0.403837	0.381229	0.17216	0.0756794	0.0770174	0.0649674	0.118308	0.161705	0.189987	0.203438	0.131988	0.110703	0.192313	0.16849	0.173373	0.284938	0.134481	0.218061	0.137287	0.223197
Epn3	0.0114552	0.0240477	0	0.0820475	0.0154428	0	0	0	0	0.00745307	0	0.00725904	0.0784632	0.0242361	0	0.0800092	0.0661867	0	0	0.106979	0.0433905	0.0931629	0.0472488	0.0701359
Rnf112	0.167126	0.175423	0.222613	0.166255	0.309792	0.133549	5.53241	5.4308	6.02486	2.63687	3.7536	3.57434	3.66318	4.21366	4.63159	3.60612	4.01945	2.59847	0.373084	0.617809	0.300698	0.254851	0.758273	0.347175
Slc3a2	14.5757	17.4936	15.5993	15.8278	19.8245	17.0102	5.53316	4.81327	3.36178	5.17786	5.2193	4.32133	7.55941	6.93429	5.41041	7.22141	7.44706	7.64741	30.7117	28.1174	30.6307	30.378	32.8905	26.3803
Nxf1	15.5328	16.1478	17.7829	14.8611	15.809	15.9164	9.36136	9.522	7.96638	11.6527	10.7935	8.54873	10.1926	11.0149	6.48276	11.5682	10.5762	9.5137	9.63613	11.1533	9.94035	11.7892	10.5836	6.92809
Stx5a	5.63586	5.0446	5.57021	4.68524	5.78846	4.56189	4.42504	4.11165	3.17792	4.06782	4.87262	3.41209	5.06563	4.77529	3.52552	4.12652	4.51201	3.84106	4.68854	3.40788	4.23883	4.81986	4.04715	2.88675
Slc47a1	0	0	0	0	0.0022925	0.00815335	0.00175917	0	0.00429264	0.00442569	0.00725339	0.00646571	0.0023296	0	0.00183912	0	0.0117906	0	0	0	0	0	0	0
Pifo	0	0	0	0	0	0.00536889	0.00695036	0	0	0	0.00358221	0	0.00460204	0	0.00363311	0.00670388	0	0	0.374964	0.156864	0.274855	0.359728	0.149647	0.152792
Tnfrsf13b	12.5222	9.24791	9.38136	11.2828	8.06866	8.03281	0.0679494	0.043809	0.0829033	0.0957296	0.128877	0.186475	0.0683869	0.0518826	0.0454639	0.0209727	0.0941208	0.125402	0.0469222	0.0408951	0.0278661	0.0142454	0.0173394	0.027577
Spire2	0.00322938	0	0.00529422	0.00514008	0.00435353	0	0.123606	0.107693	0.0529869	0.140775	0.136022	0.0941356	0.347282	0.314294	0.113507	0.28678	0.375045	0.310603	0.0432547	0.0427252	0.0122324	0.0328299	0.0213122	0.0225969
Prox1	1.10773	1.24876	1.30005	1.02879	1.38688	1.10332	2.35836	2.20918	4.06334	1.23301	1.7225	1.94004	1.54686	1.77246	3.76235	1.19082	1.53686	1.55972	0.740343	0.877888	1.02206	0.935759	0.753749	0.872198
Raver1	0	0	0	0	0	0	0	0	0.00420174	0	0	0	0	0	0	0	0	0	0	0	0	0	0	0
2610507B11Rik	11.7567	11.24	10.6054	11.4203	12.4669	11.1381	10.5822	10.0742	8.58572	11.806	10.0302	8.7179	13.007	12.1293	10.5066	12.8562	13.3646	13.0745	14.1886	14.9066	17.3827	17.8805	15.4816	15.4535
AI597479	2.06848	1.88167	1.72378	1.60226	1.61269	1.21764	2.74606	2.49788	2.48451	2.5032	2.67623	2.57348	2.36608	1.99852	1.77471	2.05014	1.82059	1.85484	1.86242	2.22149	1.60358	1.69627	1.67791	1.36897
Tmem86a	40.4412	33.8356	43.064	42.4897	49.8189	52.7385	6.25618	5.06889	2.08336	8.4436	7.37445	5.35628	12.8658	9.93513	3.95508	10.592	9.40577	10.7638	5.90848	3.9646	5.34692	6.26863	3.45117	4.33131
Optc	0	0	0	0	0	0.00879354	0.0284595	0.0583821	0	0.0286391	0.0528047	0.00697339	0.195976	0.139694	0.0773574	0.109801	0.241612	0.135285	0.208809	0.222667	0.383484	0.186452	0.108935	0.211753
Tex14	0.016555	0.026479	0.0252016	0.0194488	0.0175354	0.0151188	0.00244654	0.00238993	0.00248746	0.00359038	0.00126094	0.0024978	0.00485978	0.00111193	0.00170515	0	0.00136647	0.00171028	0.00175984	0	0.00119443	0.00160284	0	0.00482667
Ifi35	2.26355	1.87487	1.61876	1.27752	1.45568	1.70727	0.071681	0.0612698	0.0510161	0.0676251	0.0738886	0.109774	0.0237311	0.0651571	0.0249795	0.0230464	0.0400362	0.058461	0.103123	0.11684	0.148732	0.0860964	0.161957	0.0404048
Rdm1	1.05435	0.915236	0.897063	1.01964	0.971567	0.650554	0.276126	0.384375	0.168447	0.295235	0.313092	0.143775	0.886731	1.1483	0.331976	0.905534	0.67859	0.772115	1.95146	2.27466	1.63792	2.2432	2.16891	1.61093
Nedd8	6.05025	5.6253	3.517	6.78124	5.93853	3.25524	6.60793	6.34848	3.08036	6.23404	7.37691	4.75811	10.8062	10.7182	4.72497	8.93506	8.5862	5.91799	13.5466	9.84861	7.63305	11.6806	9.01769	5.84008
Gosr1	1.13779	0.971612	1.1197	1.20987	1.11789	1.10696	1.68573	1.60775	1.67539	1.63739	1.27153	1.35443	1.13158	1.23309	1.28265	1.0551	0.947103	0.99248	0.699562	0.762912	0.581941	0.825577	0.776864	0.604418
Mrpl52	7.13838	9.08476	6.33034	9.00311	9.70766	7.43884	5.20368	4.58761	1.87041	8.79996	7.189	4.31189	12.8385	17.1931	4.06319	15.1616	13.9894	10.2338	16.4945	13.7098	11.2584	14.0894	13.327	5.95155
Spaca7	0	0	0	0	0	0	0.00221802	0	0.00270615	0	0	0	0	0	0	0	0	0	0	0	0	0	0	0
Kansl3	1.73381	1.49916	2.35604	1.61167	1.6213	2.18326	1.07872	1.12826	0.847519	0.993991	0.979344	0.83528	1.23626	1.14759	0.820353	1.09896	1.00383	0.948075	0.991412	1.34656	1.22735	1.34362	1.14305	1.00064
Eya4	0.260405	0.228532	0.289321	0.296163	0.219488	0.332633	0.0074415	0.0105405	0.0084739	0.015289	0.0130401	0.0161065	0.0203659	0.0199544	0.0119288	0.0296674	0.0224441	0.0298251	0.0454989	0.0358291	0.0396002	0.0533031	0.0427259	0.0364929
Ebf3	0.284395	0.237571	0.218598	0.22868	0.221546	0.188726	0.00407197	0.00223749	0.00869418	0.00512209	0.00314803	0.0118483	0.015503	0.0111041	0.00372489	0.0206197	0.0193318	0.0092513	0.00329517	0.00536091	0	0.00666935	0.011365	0.000860724
Uckl1os	0.28424	0.472387	0.349485	0.26862	0.227515	0.496855	0.0918871	0.188498	0.201796	0.196493	0.132604	0.146347	0.0851777	0.200458	0.124882	0.194983	0.133437	0.179857	0.218117	0.0967784	0.215331	0.120399	0.234478	0.0932299
Myt1	0.018436	0.0129008	0.0256902	0.0220079	0.0124268	0.0220981	1.71549	1.47832	0.581719	3.04792	1.62481	1.34935	3.45877	2.99563	1.66983	4.20515	2.42228	3.20506	0.179027	0.212346	0.202515	0.267387	0.141439	0.211241
Faf1	0.181143	0.166694	0.197976	0.154032	0.160011	0.183416	0.187815	0.168006	0.12397	0.238673	0.204845	0.180569	0.211324	0.169166	0.118526	0.212104	0.173481	0.155818	0.119096	0.0878668	0.0914853	0.132296	0.0774445	0.0803043
Gm266	0	0.13701	0	0	0	0.0782292	0.101273	0.51938	0.3089	0.636949	0.626349	0.55833	1.00583	1.93316	0.476438	1.85594	1.75348	1.34512	18.3575	24.304	14.1654	16.8525	13.729	10.2753
Tsacc	0.133518	0.145986	0.0957635	0.172669	0.20812	0.166708	0.0733768	0.0252985	0.0631942	0.0814411	0.0711873	0.0634567	0.0628747	0.0647367	0.0586617	0.0416321	0.0241078	0.0663815	0.158344	0.0974152	0.0821836	0.130079	0.0619556	0.116783
Mettl16	0.556181	0.562169	0.560587	0.462298	0.587334	0.488884	0.515689	0.56985	0.405586	0.457024	0.546947	0.34592	0.471262	0.546234	0.262879	0.464515	0.485602	0.30687	0.360981	0.39437	0.369848	0.460708	0.472406	0.221614
Dazl	0.0166909	0.00583983	0	0.00664157	0.00562526	0.0133376	0.00863317	0.00632507	0.00526655	0	0.00889904	0.00528843	0.00571628	0.0117711	0	0	0.0144657	0.0120702	0.00931499	0	0	0.011312	0.0137689	0.0145989
Apol7a	0	0	0	0	0	0	0	0	0	0	0	0.00691512	0.00747457	0	0	0	0	0	0	0	0	0	0.0180041	0
Pigyl	8.64633	7.86548	4.96115	8.19465	7.89437	5.02488	28.866	21.7444	14.9804	24.9058	30.0903	16.1882	35.4803	39.6354	20.572	28.5482	29.7019	21.9412	29.7421	24.1019	19.4124	23.7593	24.3806	9.96888
Rbm25	7.83355	4.92383	8.19725	6.72087	4.69505	7.34511	3.54355	3.67335	3.92589	4.40673	2.85522	4.02203	2.23255	2.08544	2.17123	2.77225	1.67678	2.41339	1.08145	0.695204	0.720116	1.40178	0.835166	0.93159
Psen2	0.30989	0.269349	0.264711	0.321904	0.329813	0.284124	0.20078	0.197783	0.12763	0.237703	0.255661	0.183972	0.2994	0.273759	0.156988	0.23109	0.226169	0.26892	0.334969	0.248786	0.296543	0.358144	0.34713	0.259636
Acaa1b	0	0	0.0214816	0	0.00883234	0	0.0135551	0.00993113	0	0	0	0	0.0179505	0.0277232	0.0141711	0.0130744	0.0681387	0.0189517	0.0146257	0.0101976	0	0.0266418	0	0
Plcd1	0.751756	0.764475	0.673842	0.796258	0.605149	0.656905	0.35247	0.319721	0.18089	0.482075	0.38351	0.325583	0.433422	0.389045	0.201791	0.491069	0.406231	0.316798	1.2858	0.984903	1.63477	1.27922	1.36075	1.3056
Fads1	17.5268	15.7187	14.68	18.3702	16.3151	14.5147	24.2919	22.9615	12.594	21.8395	21.6518	17.707	23.1781	20.0179	10.6628	21.1841	18.9429	18.5851	77.5788	65.913	70.6239	76.4648	68.3184	57.3148
Lmbr1	0.0599885	0.0509329	0.0911327	0.0687465	0.0614616	0.0773374	0.282151	0.250364	0.238246	0.350231	0.268238	0.303099	0.420209	0.345221	0.250425	0.411011	0.308711	0.369031	0.138379	0.150017	0.111493	0.142026	0.14582	0.116133
Tnfrsf22	0.200013	0.195946	0.203298	0.197379	0.253459	0.230153	0.852462	0.739764	0.742184	0.983813	0.865919	1.07988	1.0412	0.914053	0.72248	0.894077	0.753483	1.21499	0.20539	0.336223	0.357596	0.244	0.316794	0.237923
Cars	1.00935	1.06721	1.25922	0.964362	1.05417	1.03257	1.16175	0.97515	0.624717	1.10774	0.993507	0.98929	1.04084	0.891747	0.668752	0.971146	0.765834	0.739946	0.708772	0.483395	0.613399	0.78743	0.601607	0.482649
Phlda2	0.0740484	0	0.0606971	0	0	0	0	0	0	0	0	0	0	0	0	0	0	0	0	0	0	0	0	0
Asz1	0	0	0	0	0	0	0	0	0	0	0	0	0	0	0	0	0	0	0	0	0	0	0	0
Wnt2	0	0.001997	0	0	0.00192362	0	0	0	0.00180096	0.00185678	0	0	0.00195475	0.00402528	0.00462957	0.00569504	0.018138	0.00206378	0	0	0	0.00773655	0.0211879	0
Gabra1	0.0525764	0.0415897	0.0412228	0.0327458	0.0662557	0.0730667	0.169079	0.20617	0.0692437	0.313818	0.243756	0.165137	0.897182	0.857655	0.368358	1.1929	1.42776	0.824894	0.183708	0.149437	0.0813921	0.0805611	0.275317	0.119965
Grid2ip	0.0102414	0.00238884	0.0139913	0.0027168	0.00690319	0.0109117	0.105944	0.129366	0.025852	0.151035	0.141969	0.0497555	0.353083	0.474287	0.131065	0.391718	0.424076	0.246872	0.0152416	0.0797028	0.0879301	0.0670956	0.0619552	0.0418027
Kdelr3	0.020983	0.0146831	0.0343993	0.0417472	0.0282872	0.0586857	0.135665	0.127225	0.205246	0.0273042	0.173405	0.159561	0.11498	0.147981	0.289334	0.0209366	0.0242474	0.0986315	0.409862	0.244948	0.286129	0.504842	0.164441	0.119294
Cfap97d1	0	0.0104152	0.0488009	0.011845	0.0300974	0.0237872	0.00769849	0	0	0	0.00793558	0	0.0101948	0	0	0.014851	0	0	0	0	0.0112756	0	0	0
Apip	0.739313	0.982074	0.477619	0.772855	0.891088	0.690911	1.07267	1.07792	0.846128	1.27592	1.56335	0.92905	1.49774	1.50232	0.775842	1.68166	1.62902	1.27317	1.5525	1.55544	1.33375	1.54988	1.45752	1.18369
Pdhx	0.525815	0.447243	0.559195	0.528485	0.464419	0.46183	1.20394	1.32954	1.04267	1.28733	1.28815	1.12169	1.09911	0.952641	0.698572	1.0493	0.855118	0.750663	0.930947	1.2488	0.673058	1.05065	0.854435	0.701758
Vac14	0.936186	0.984293	1.11663	1.06647	1.21565	1.27513	0.536155	0.590104	0.427996	0.616703	0.5981	0.633936	0.558093	0.539221	0.475307	0.552084	0.509217	0.584156	0.495112	0.402445	0.588957	0.579897	0.581624	0.463535
Mcoln2	0.0676454	0.0600798	0.0746423	0.0621164	0.0561186	0.0498968	0	0	0	0	0.00138716	0	0	0	0	0.00259599	0.00150325	0	0	0.00404958	0	0.00176329	0	0
Slc5a1	0	0	0	0.00161263	0	0	0.00104811	0	0	0	0	0	0.00138797	0	0	0	0	0	0	0	0	0	0	0
Akt1s1	0.425116	0.620828	0.409068	0.809026	0.598016	0.487406	1.10899	0.952585	0.536554	1.15447	1.00518	0.855026	1.07612	1.31656	0.649658	1.19876	1.34561	1.01585	2.12495	1.33776	1.38624	2.07944	1.73821	1.05083
Tbrg1	1.51531	1.78023	1.59535	1.55996	1.48993	1.33307	3.87573	3.29788	2.02658	3.9617	3.73567	3.0569	4.18026	3.84326	2.03721	3.64813	3.29327	2.61387	3.91028	2.78051	2.64345	4.31519	2.09867	3.02771
Panx3	0	0	0	0	0	0	0	0	0	0	0	0	0.00872234	0	0	0	0	0	0	0	0	0	0	0
Adssl1	0.362426	0.382368	0.365635	0.430425	0.345768	0.432189	1.63523	1.27623	1.8825	0.344637	0.719422	0.876262	0.672174	0.69208	2.35477	0.061198	0.438139	0.374993	0.0995767	0.112822	0.101377	0.0302311	0.0275978	0.0292615
Cfap161	0	0	0	0.00455183	0.0154212	0	0	0	0	0	0	0	0.0313415	0.0201685	0	0	0.0198283	0.00827239	0.331972	0.418417	0.255647	0.457412	0.297252	0.0900488
Brf1	2.81766	2.47126	3.53518	2.44263	2.23057	3.02079	1.09872	1.13983	1.11341	1.18409	1.06704	1.26451	0.803654	0.769677	0.93348	0.744459	0.747226	0.795581	0.816458	0.799253	0.782453	0.846737	0.801342	0.647473
Vipr2	0.00693647	0.00121347	0.00142145	0.00414019	0.00116888	0.00415716	0.320211	0.325946	0.137888	0.561876	0.331922	0.315382	0.845711	0.781479	0.493237	1.14026	0.671307	0.93301	0.0754875	0.0850226	0.124803	0.168064	0.140192	0.101623
Odc1	1.11569	1.48708	2.97584	1.3389	1.49213	1.88214	3.89298	3.12734	2.034	3.9406	2.76652	2.90656	4.53668	3.1848	1.7716	4.68261	2.54783	3.49624	8.22298	5.69206	5.72866	8.30556	4.49958	3.85694
Thg1l	1.40128	0.711387	1.02475	1.33384	1.22234	0.933126	1.25773	1.2911	0.823615	1.11729	0.930232	0.887976	0.856306	1.14326	0.460583	0.945829	1.05571	0.774915	0.7207	0.641492	0.405892	0.810033	0.38532	0.204274
Adam19	0.254996	0.251268	0.216484	0.285763	0.190296	0.249509	0.983818	1.13295	1.49836	0.310653	0.608331	0.505376	0.642504	0.563357	1.2832	0.331022	0.484096	0.438428	0.0537293	0.0415123	0.0187263	0.0255702	0.0719069	0.0159311
Pabpc4	0.237215	0.172815	0.167807	0.217229	0.186178	0.168783	0.179842	0.152695	0.106635	0.211422	0.190579	0.168853	0.126869	0.0985428	0.0825862	0.197782	0.14457	0.0963467	0.0834216	0.131504	0.135395	0.149757	0.107225	0.113689
Exoc3l2	0.0675453	0.0621915	0.0786788	0.0877048	0.0694915	0.0710196	0	0.00269437	0	0	0.00189541	0.00225278	0.00243503	0	0	0.00354716	0.00616213	0.00771254	0	0	0.00538633	0	0.00293265	0
Zfp296	0.0352769	0.0493707	0.0289163	0.0561487	0.0951134	0.0845684	0.0182465	0.0267365	0.0222621	0	0.112851	0	0.0241631	0.124394	0	0.0703977	0.040765	0.0255108	0	0.054908	0.106899	0.071725	0.058202	0
Plin5	0.0198245	0.0138724	0.01625	0.0315538	0	0.0950495	0.0307619	0	0.0125106	0.0515934	0	0.0125626	0	0	0	0.0197807	0.0229087	0.0143363	0.331914	0	0.180221	0.295586	0.2126	0.0693587
Sugp1	0.857133	0.689897	1.02584	0.723764	0.830007	0.948609	1.12396	1.17726	0.965002	1.39026	0.971918	1.08886	1.16042	1.19762	0.848642	1.34911	1.05791	0.945773	1.11392	0.789196	0.856637	1.17	0.853139	0.728582
Dmrtc2	0	0	0	0	0	0	0.00809487	0	0	0	0.00834417	0	0	0	0	0	0	0	0	0	0	0	0	0
Gm5893	0	0	0	0	0	0	0	0	0	0	0	0	0	0	0	0	0	0	0	0	0	0	0	0
Dhdh	1.50077	1.42358	1.60196	1.53939	1.74444	1.78556	0.510603	0.51564	0.395672	0.893988	0.643685	0.642469	0.671603	0.639748	0.573483	0.545739	0.624331	0.863415	0.595599	0.493141	0.788276	0.632877	0.53373	0.5309
Zfp790	0.94976	0.631096	0.804682	0.635166	0.839235	0.561237	1.0403	0.961787	0.856233	0.675061	0.927655	0.763696	0.912949	0.96813	0.500629	0.820244	0.770108	0.594482	0.400878	0.546595	0.25999	0.438138	0.427955	0.418849
Cpb1	0.0129798	0	0	0	0	0	0.00895154	0.00327916	0	0	0.0138408	0.0137086	0.00592709	0.0183079	0	0.0172682	0	0	0	0.00336716	0.00327771	0	0.0107075	0
Slc25a41	0	0	0	0.01065	0	0	0.00692179	0	0	0	0.00713497	0	0	0	0	0.0667633	0	0	0	0	0.010138	0.0181392	0	0
Fsd1	0.0114585	0.0320729	0.00939249	0.0455951	0.100407	0.0824077	1.29796	1.32004	0.809883	1.7147	1.58231	0.922165	2.11912	2.31117	1.14628	2.60677	2.84023	1.48326	0.844121	0.650979	0.798616	0.962962	1.20992	0.26058
Pinlyp	0.0266475	0	0	0	0	0	0	0	0	0	0	0	0	0	0.0144094	0	0	0.0578112	0	0	0	0	0	0
Fuz	0.43534	0.507723	0.327109	0.519684	0.464614	0.188433	0.516023	0.384937	0.320517	0.542884	0.464217	0.540246	0.894567	0.741964	0.343302	0.524873	0.702198	0.629641	0.62764	1.1858	1.00314	1.09412	1.84052	0.634624
Sptbn4	0.00520674	0.00455434	0.00320095	0.00621551	0.0105288	0.00728116	0.0680013	0.0789243	0.0279293	0.105017	0.0832818	0.0585654	0.214875	0.196453	0.0661645	0.168845	0.223373	0.12049	0.0232465	0.0314039	0.0138056	0.0255837	0.032214	0.0102468
Pgam1	0.0352821	0.123445	0.144603	0.0701963	0.166473	0.0563873	0.346735	0.320886	0.256052	0.321377	0.404441	0.32419	0.507501	0.186618	0.257561	0.264031	0.336361	0.318933	0.728548	0.480516	0.307379	0.478237	0.465685	0.293169
Evi5	0.939385	0.800302	0.946438	0.804204	0.658397	0.627489	0.583062	0.59653	0.568643	1.16601	0.749328	1.02469	0.595337	0.558296	0.389112	0.700706	0.475314	0.746599	0.357311	0.357728	0.323351	0.532193	0.346837	0.410024
Evi5l	0.252641	0.254948	0.213628	0.300531	0.32266	0.303888	2.7772	2.82984	2.34955	3.23041	3.05131	2.58682	3.8945	3.69475	2.77974	3.67245	3.42345	3.35399	0.44525	0.763699	0.707147	0.690301	0.69105	0.502428
Snapc2	3.06582	2.17183	1.67536	2.68084	2.75535	2.08693	4.42445	4.38902	2.07805	5.17146	6.11458	3.66969	11.122	11.3446	4.87113	10.3856	10.191	8.12929	9.46328	10.9577	8.83149	9.77339	10.3037	5.9921
Git1	4.87957	3.88228	4.37645	4.75439	5.15889	4.43337	5.82139	6.16165	7.08143	4.0609	6.4016	5.26299	6.70177	8.22608	10.3646	6.28607	8.08151	7.06348	7.08786	6.54158	7.56413	6.98785	7.17527	6.10232
Gltp	6.67851	7.69775	6.12873	7.51455	7.35925	6.64343	40.4244	40.2556	34.6549	35.7039	49.0492	43.5212	25.4746	30.0576	36.1851	16.717	30.4438	27.3334	5.63534	6.57294	5.44733	4.2949	5.3776	2.97609
Bnip2	16.7008	14.3204	14.196	14.2243	11.7926	11.7838	3.60011	3.51203	2.94418	3.97478	3.49249	3.41186	3.56697	3.28578	2.05913	3.12645	2.28762	2.62156	2.42073	3.30208	1.80539	2.72179	2.35599	1.97414
Ccnt1	3.2409	3.06251	4.16767	2.5704	3.37993	3.73882	2.58026	3.004	2.92707	2.66276	2.50836	2.94624	2.12643	1.87478	2.02364	1.90934	1.96841	2.10906	0.962997	1.20228	1.41614	1.35936	1.12537	1.477
Scarf2	0.215871	0.226587	0.247728	0.163207	0.174609	0.276001	0	0	0	0.0140452	0.0172643	0.0205193	0.00739311	0.0228362	0.0116731	0.0430787	0.0436546	0.0468328	0.19276	0.0756001	0.228952	0.212139	0.0534236	0.0566441
4930579F01Rik	0	0	0	0	0	0	0	0	0	0	0	0	0	0	0	0	0	0	0	0	0	0	0	0
Brms1l	0.736307	0.679518	0.691017	0.588805	0.5035	0.474681	1.54546	1.58249	1.29521	1.90467	1.63288	1.39977	1.82731	1.53525	1.20215	1.60778	1.33589	1.16268	0.710679	0.99103	0.778768	1.07518	0.651418	0.528904
Med15	0.964656	1.20752	1.38108	1.11624	1.29457	1.15686	0.928676	0.934023	0.864022	1.0612	1.0558	0.935841	1.04843	1.22416	0.955145	1.11351	1.12818	1.07849	1.04912	1.22858	1.39655	1.20106	1.10064	1.00282
Dhdds	0.678278	0.633713	0.562091	0.655464	0.786272	0.72069	0.809609	0.813474	0.646763	0.737127	0.780893	0.609302	1.24572	1.0592	0.796021	1.14904	1.21661	0.859729	1.16473	0.954219	0.703004	0.932013	0.91001	0.704092
Crybg2	0.00375044	0.00787324	0.00922265	0.020893	0.00758395	0.0059939	0	0	0.00473357	0	0	0.00475323	0	0.00528994	0	0.00374215	0.00866783	0	0	0.011675	0	0.0076254	0.00928158	0.00328036
Ubxn11	0.0379963	0.079765	0.0856498	0.0680368	0.0544242	0.0569298	0.0491328	0.0467961	0.0179837	0.0525331	0.0658397	0.0481557	0.0260258	0.0502436	0.0436608	0.0710856	0.115257	0.0789976	0.302175	0.188511	0.215886	0.453868	0.36046	0.153707
Mogat1	0	0	0	0	0	0	0.00452303	0.00662757	0	0.00284474	0.013987	0.00277068	0.0119793	0.00616705	0.00709287	0.00436263	0.00505251	0.00948561	0.00976049	0	0.0563093	0.00296325	0.00360685	0.00382427
Tex22	0	0	0	0	0.00555735	0.0065883	0	0	0.0156089	0	0.0175832	0.0104492	0	0	0	0	0	0	0	0	0	0	0	0
Wnt8a	0	0	0	0	0	0	0	0	0	0.0129741	0	0	0	0	0	0	0	0	0	0	0	0	0	0
Tjap1	0.226601	0.294009	0.205092	0.26299	0.365941	0.20371	1.25997	1.38825	1.02484	0.850812	1.34912	0.711992	0.860134	1.07538	1.10535	0.786641	0.706462	0.628165	0.806204	0.7201	0.468505	0.553511	0.494588	0.367494
Ehf	0	0.00626164	0	0	0.0100526	0	0.00154279	0	0	0	0	0	0.00612917	0	0	0	0	0	0.00665854	0	0	0.00404302	0.00246057	0.00521779
Nanog	0	0	0	0	0	0	0	0	0	0	0	0	0.011395	0	0	0	0.00961208	0	0	0	0	0.0225496	0	0
Rpl15	2.99784	2.82034	1.41978	2.33275	2.46974	1.59703	2.61878	2.39831	1.00898	3.20745	2.98358	1.85749	3.05727	2.25515	1.15276	2.89151	2.34798	2.52924	1.5987	2.46266	1.48881	1.30934	1.34642	1.10711
Tmem167	0.574888	0.549535	0.608157	0.5611	0.476702	0.473257	1.55746	1.77573	1.59081	2.30915	1.88996	2.40026	1.14417	1.33258	0.875119	1.28577	1.07169	1.33349	0.498812	0.536883	0.401004	0.445491	0.413397	0.373803
Steap4	0.0163883	0.0152905	0	0.00434742	0	0	0	0	0	0	0	0	0.00748351	0.00385257	0	0.00545068	0.00315631	0	0	0.00425136	0.00413841	0.0111069	0.0045064	0.0238903
Mplkip	3.39118	3.08492	2.75835	1.9722	2.97157	2.04282	1.75404	2.11546	1.44866	2.27428	2.44784	2.11589	2.41215	2.26282	1.84786	1.87404	2.09503	2.28259	1.74699	1.25868	1.73905	1.55578	1.03292	1.48306
Kif11	0.298061	0.201253	0.169309	0.736585	0.130414	0.192214	0.187977	0.200141	0.0428992	0.369141	0.179826	0.102723	1.019	0.971736	0.294072	1.46614	0.564988	0.648528	0.51946	0.372363	0.41595	0.738916	0.312742	0.365897
Rpa3	1.4319	1.54152	0.902863	1.72393	1.55912	1.17356	2.06997	2.11484	1.20484	1.88716	2.56438	1.83803	2.99267	3.52148	1.58829	2.19805	2.22744	2.36305	5.08162	3.08594	2.8927	4.08086	3.60424	2.40851
Mlkl	0.0946096	0.113493	0.110787	0.129074	0.0698451	0.118803	0.0233027	0.0614615	0.0341172	0.0381059	0.0552468	0.0371139	0.0246871	0.0222409	0.0243617	0.00899052	0.0156184	0.013032	0	0	0.00341301	0.00305334	0	0
Phox2b	0	0	0	0	0	0	0	0	0	0	0	0	0.0332132	0	0	0	0	0.0175328	0	0	0	0.0164315	0	0
Tnpo3	1.28554	1.17173	1.51644	1.14496	1.22032	1.15103	0.945319	0.996489	0.80366	1.08162	0.862492	1.08181	0.905292	0.89812	0.613255	0.916947	0.71592	0.685726	0.493662	0.63617	0.512364	0.642651	0.515334	0.41695
Ttll5	0.110715	0.127604	0.153992	0.0988748	0.130345	0.116894	0.432474	0.463221	0.569698	0.261409	0.33361	0.321906	0.216524	0.265687	0.517685	0.158957	0.227801	0.200343	0.136997	0.122422	0.163194	0.162972	0.132246	0.111736
Zfp715	5.72098	5.54531	7.39602	3.87248	5.06979	5.29372	1.01393	0.916717	1.04844	0.940734	0.908029	1.03077	0.799914	1.05892	0.744265	0.880874	0.931809	1.02047	0.488814	0.687053	0.500284	0.494674	0.573441	0.547209
Retn	0	0	0.0224467	0	0.0369167	0	0.0141642	0.0415094	0.0172813	0.017817	0.0584015	0.0347063	0	0	0	0.0546475	0.0158223	0	0	0.0426233	0	0.0185592	0	0
Acp4	0	0	0.0372539	0	0.0459518	0.0181588	0.0587691	0.0516684	0.0143405	0.073925	0.0242316	0.0432003	0.0311302	0	0.024576	0	0.0131298	0.0492998	0.0253642	0	0	0.030802	0	0.019876
Cdh23	0.0784788	0.0927243	0.107132	0.0881587	0.121056	0.117223	0.00249798	0.00114384	0.00152386	0.000785546	0.00193118	0.00248656	0.00144724	0.00106436	0.00163219	0.00271057	0.00470881	0.00283764	0.0040429	0.00211416	0.000685997	0.00327309	0.00298799	0.000792027
Rps5	87.4326	88.273	63.2691	107.815	101.011	76.7799	53.7534	47.9678	25.8648	62.3917	68.108	48.1582	80.4241	101.605	38.5655	71.1618	75.6043	67.8614	99.6722	70.8632	69.5541	87.6564	60.2164	42.7771
Podnl1	0	0.0254405	0.0149004	0.0867995	0.0367586	0	0.00940233	0.0551088	0	0	0.0290757	0.0115192	0.0124511	0.0128199	0.0294889	0.0181378	0.10503	0.0131456	0	0	0.0688554	0.0123198	0	0
Adgrl1	0.570823	0.618039	0.567999	0.531121	0.719756	0.59911	4.00866	3.76022	2.29758	5.21059	4.23356	2.71564	7.46187	6.74953	3.5735	7.0756	8.23716	6.61502	5.18904	5.95856	6.33382	5.84341	5.54995	5.29333
Amotl1	0.374678	0.317849	0.323186	0.305519	0.360566	0.294796	0.282049	0.247272	0.157874	0.372039	0.303644	0.201632	0.533807	0.511403	0.277412	0.570552	0.501577	0.492716	0.621518	0.713275	0.896947	0.954002	0.671424	0.782484
2200002J24Rik	0	0	0	0	0	0.0589878	0	0.0559474	0	0	0	0	0	0	0	0	0	0	0	0	0	0	0	0
Etv5	1.73561	1.49643	1.64783	1.83627	1.54157	1.69421	0.440968	0.363941	0.136109	0.7996	0.621615	0.341685	2.10587	2.00465	0.744875	2.12767	1.9927	1.8128	1.48984	1.58984	1.70791	1.71409	1.74732	1.3757
Tmem190	0	0	0.0693867	0	0	0.135285	0.35027	0.0641562	0.213678	0.0550752	0.361058	0.160924	0.405868	0	0.228868	0	0.538003	0.24486	0	0.0658778	0	0.229479	0	0.444237
Gfod2	0.00530452	0.0278392	0.00652213	0.0211075	0.0232408	0.0127164	0.0507583	0.0723658	0.0318014	0.0569459	0.0650484	0.0285721	0.125351	0.138416	0.0258155	0.108502	0.0812194	0.0843924	0.0976927	0.0825641	0.0783614	0.0790911	0.0678259	0.0463965
Enkd1	0.312826	0.200661	0.384633	0.643136	0.579865	0.416628	0.795542	0.434669	0.213865	0.610599	0.500365	0.462547	1.0535	1.54433	0.563862	1.37859	0.888671	0.923745	1.80404	1.60274	1.87615	2.31447	1.13976	1.09447
4933405L10Rik	0	0	0	0	0	0	0.0237254	0	0	0.0298439	0.0244561	0.029067	0	0.0323491	0	0.045768	0	0.033171	0.0511983	0	0.138997	0.248698	0.0756783	0.0802404
Atp6v0d1	3.05537	3.37004	2.84418	3.36869	3.5718	3.10157	3.92204	3.70638	2.53599	4.5653	5.12021	4.0172	4.6574	4.77517	3.0756	4.20931	4.77751	4.31983	4.59389	3.67238	4.49289	4.2383	4.41141	3.61237
Ptprs	1.50283	1.43072	1.13453	1.51197	1.81461	1.39067	6.44695	5.6022	3.91883	8.47169	7.64063	5.96909	10.356	9.52825	5.3474	10.2263	11.0287	9.80657	7.82796	6.8398	8.08753	9.15911	7.29298	6.19096
Slc41a1	1.04545	1.45146	1.48143	1.19932	1.49933	1.5464	2.29529	2.28434	1.52304	3.23094	2.36302	1.91347	4.13656	3.60804	2.81458	4.05049	4.72314	3.94502	18.4781	16.7527	21.919	17.0765	18.8403	16.9896
Fer1l4	0	0	0	0.00559528	0	0	0	0	0	0	0	0	0	0	0	0	0	0	0	0	0	0	0	0
4931406B18Rik	0.00855266	0.0179545	0	0.00680646	0	0	0	0.0064821	0	0	0	0	0	0	0	0	0	0.0123699	0	0.0199682	0.0259169	0.0347785	0	0.00748067
Iglon5	0.0415285	0.0193734	0.00567345	0.060591	0.0653153	0.0442468	1.29239	1.20128	0.406213	2.40024	1.77502	0.684221	3.53195	3.31927	1.2351	4.26108	3.98311	3.00318	2.09362	1.85297	2.22322	2.35482	2.27246	1.71325
Igf2bp1	0	0	0.00199723	0.00193908	0.00164236	0.00194703	0.00252055	0	0	0.00158529	0	0	0.00333787	0	0.00131755	0.00486233	0.00140781	0	0	0	0	0.004954	0.00200999	0.00426231
B4galnt2	0.0315645	0.0237867	0.031844	0.00772923	0.00981972	0.0116414	0.00251175	0.0073609	0.00306452	0.00157975	0.00129455	0	0.00332621	0.00171236	0.00656474	0.00484535	0	0.00175586	0	0	0	0.00164557	0.00200297	0.00637113
Zfp651	0.191505	0.428824	0.196219	0.228607	0.264621	0.344317	1.87706	1.57479	1.13601	2.09948	1.79192	1.41378	3.97452	2.68764	2.33516	2.56049	2.58365	2.70053	4.60637	4.11343	3.67772	4.16623	3.58611	2.86427
Nelfb	3.35038	2.95883	2.84555	2.60208	3.46231	2.96757	2.62029	2.34806	1.77679	2.60663	2.53419	1.98241	3.08978	3.2738	1.54431	2.81938	2.61217	2.26231	3.1201	2.63097	2.28586	2.69471	2.55572	1.94186
Card14	0.00316025	0.00442285	0.0103618	0.0150901	0	0.00505067	0.00653841	0.0095807	0.017949	0.014393	0.00673977	0.00600786	0	0.00668623	0.0222155	0.00315327	0.00182595	0.00457075	0.0105822	0.00245945	0.00478822	0.00214181	0.002607	0
Tmem175	1.37526	1.74099	1.43986	1.64669	2.04782	1.49359	1.53261	1.63455	1.2466	1.71636	1.71646	1.46569	1.8583	2.45118	1.75775	1.95854	1.80954	2.08401	1.99554	2.27193	3.12083	2.83432	2.77436	2.25268
Bcas1	0.0881943	0.0884581	0.14097	0.125168	0.172397	0.224347	27.7764	29.0822	21.0818	43.83	35.4368	39.4782	10.769	9.88228	8.8911	7.68528	10.2467	11.9224	1.52911	1.80057	0.903092	0.875664	1.32413	0.524552
Tango2	0.585717	0.619191	0.956097	0.604169	0.720133	0.801496	0.299054	0.308647	0.322036	0.317297	0.372597	0.283549	0.358145	0.377615	0.266428	0.280924	0.322443	0.310858	0.176768	0.244544	0.251378	0.245332	0.203224	0.200084
4833413E03Rik	0.358876	0.376691	0.392225	0.142802	0.282217	0.764733	0	0	0	0	0	0	0.0819382	0	0	0	0	0	0	0	0	0	0	0
Aldh1a2	0.0162493	0.0279098	0.0351151	0.0176341	0.0318629	0.0224282	0.00305628	0.00111959	0.00559333	0.00384446	0.003938	0.00187219	0.00809462	0.00520896	0.00319517	0.0191613	0.0119492	0.00427305	0.00329766	0	0	0.00100116	0	0
Ndufs2	9.28644	8.01724	7.68864	8.75753	8.39125	8.01231	14.7816	12.1807	8.8586	11.9765	13.2518	10.025	14.2478	12.2569	9.19975	10.1122	9.96288	8.88828	16.7353	12.8488	9.97004	13.8686	11.7163	8.56255
Snx31	0.00461446	0	0.00189123	0.00183616	0.00155519	0	0	0	0	0.00150115	0.00123014	0	0	0.00650862	0.00124762	0.00230213	0.00399926	0.0016685	0	0	0	0.00312738	0.00761323	0
Atraid	10.4893	10.3841	10.7283	11.0753	10.358	10.0674	10.4613	9.59129	6.01339	11.3091	10.5626	8.06707	13.0925	14.3302	8.1771	14.2054	12.1865	10.7858	19.1489	19.5947	16.2922	17.3321	16.7156	12.403
Cad	0.892649	1.12295	0.961898	1.12945	1.38253	0.87761	1.20616	1.15545	0.575981	1.59226	1.30747	0.746802	1.64536	1.55261	0.810818	1.56118	1.45746	1.12786	1.88076	1.57673	1.79698	2.56946	1.46034	1.19747
Lypd8	0	0	0	0	0	0	0	0	0	0	0	0	0.0139333	0	0	0	0.00587665	0	0	0	0	0	0	0
Sh3bp5l	0.629046	0.410836	0.601563	0.600736	0.593611	0.329525	1.20024	1.43557	0.965962	1.005	1.25583	1.21358	1.41708	1.25202	1.13762	1.01122	1.38517	1.05133	1.02198	0.968223	0.767767	0.961601	1.05514	0.562428
1810065E05Rik	0	0	0	0	0	0	0	0	0	0	0	0	0.0165694	0	0	0	0	0	0	0	0	0	0	0
Atad1	0.964413	0.983609	1.09644	0.839679	0.853427	0.83894	1.42523	1.47376	1.15999	1.77009	1.60952	1.74611	1.28652	1.49681	0.899658	1.63222	1.35427	1.4062	1.00443	1.25408	1.14678	1.00465	1.13654	0.919802
Pten	5.23419	5.08222	4.604	5.24823	4.22346	4.29325	0.920346	0.986508	0.82906	1.34351	1.11849	1.17253	1.4061	1.39525	0.819905	1.80305	1.41312	1.43321	0.801768	0.805536	0.738241	0.987732	0.818165	0.864457
4933402N03Rik	0	0	0	0	0	0	0	0	0.00872003	0	0	0	0	0	0	0	0	0	0	0	0	0	0	0
Pea15a	20.1933	21.1297	15.2761	22.3502	23.3824	18.3607	49.4415	51.2507	47.6162	34.841	43.9899	40.1229	69.5373	62.2717	68.3609	50.1009	56.9195	56.0065	100.808	102.296	107.871	118.215	107.149	92.7268
Timm23	0.0273389	0.0344353	0.0582649	0.0348114	0.0442267	0.0393234	0.0424221	0.0331525	0.0310549	0.0391324	0.0553895	0.0415785	0.0599231	0.0424172	0.0236533	0.0436456	0.0284329	0.0395409	0.048824	0.0553185	0.0248533	0.037057	0.0315738	0.0430421
Tnfaip8l2	19.8847	21.4723	18.221	23.1209	22.4046	15.5217	0.129917	0.0634557	0.0528362	0.299606	0.156238	0.318334	0.200718	0.147616	0	0.08354	0.193501	0.333007	0.23363	0.162896	0.0317137	0.0567433	0.0345337	0
Trnt1	2.59874	1.97419	2.87427	1.96191	1.87166	2.16197	4.92553	4.81607	6.74526	3.54375	4.07601	5.13777	2.99312	2.9374	4.93763	2.47755	2.37569	3.06996	1.19205	1.05278	1.04504	1.47776	1.17467	1.29998
Ly6g6e	1.06226	1.26803	1.02438	1.34265	1.51626	0.748977	0.193919	0.142075	0.0394327	0.16262	0.133261	0.079193	0.2568	0.088135	0.236521	0.374085	0.577655	0.225936	0.27898	0.0972581	0.284023	0.127046	0.670103	0
Ehmt2	4.70571	4.47767	5.48266	4.97707	5.35159	4.97919	4.20915	4.21388	2.70491	4.7488	4.90399	3.58608	5.50087	4.95379	2.69305	4.99209	4.28766	3.80009	4.7246	3.32387	4.47779	5.28779	3.83156	2.86845
Elof1	5.05735	2.66414	1.86314	3.27862	2.27899	1.79361	3.08611	2.71324	1.03994	3.27197	3.21145	1.69242	5.17664	5.51028	2.22773	5.04617	5.20391	2.9176	9.8627	6.50079	6.06979	10.1093	7.05485	3.20577
Med16	1.34608	1.1935	1.2747	1.6967	1.54414	1.60344	1.44438	1.40673	1.08162	1.83318	1.90342	1.70599	2.22197	2.26419	1.46933	2.00214	2.08687	2.02546	2.96759	2.41398	2.97056	2.22687	2.58639	1.58688
St3gal1	0.284444	0.315994	0.308242	0.24811	0.346629	0.297926	0.0182867	0.0207056	0.0192687	0.0303217	0.0454111	0.0437893	0.114477	0.102001	0.0538774	0.14752	0.197775	0.10343	0.286996	0.297657	0.331142	0.330008	0.289	0.272687
Tmem259	2.73621	2.77453	2.95932	3.32682	3.87653	2.84445	3.56438	3.66753	2.24635	3.78304	3.76195	3.19488	5.57917	5.63719	3.45922	4.66402	5.92123	4.37883	6.34854	5.57991	5.62361	5.91526	5.92511	3.5788
Rnf170	0.73313	0.520711	0.643009	0.565943	0.434866	0.61806	0.322322	0.402841	0.469595	0.438835	0.404561	0.527295	0.326406	0.392946	0.299309	0.351125	0.300751	0.368469	0.192301	0.253896	0.141626	0.201231	0.257033	0.259702
Clip3	0.907125	0.94466	0.925066	1.27899	1.49732	1.75797	67.875	68.7028	78.1202	75.5829	83.1648	89.3802	46.9431	44.3135	89.136	38.1006	52.9944	57.8208	34.3297	33.8029	50.3882	37.1391	36.8914	41.3519
Thap8	0.140607	0.0819925	0.240114	0.0279747	0.110572	0.121721	0	0.0177611	0	0	0	0.0148502	0	0.140479	0.00633601	0.0116913	0	0.0254203	0	0	0.0177532	0	0	0
Myl2	0.484085	0.371954	0.435705	0.498558	0.575819	0.250301	0.0098191	0.0143879	0	0	0.00506075	0.0060149	0.0195046	0.0200822	0	0	0.03839	0.0205924	0.0317838	0.014774	0.0575259	0.0192989	0.0783015	0.00830216
Dedd	0.558817	0.479337	0.480223	0.444723	0.589307	0.345713	0.256407	0.280076	0.30146	0.299075	0.288331	0.268443	0.327203	0.425883	0.355789	0.269798	0.390577	0.247683	0.331989	0.25252	0.402858	0.280993	0.260234	0.173436
Mcemp1	0.372989	0.261003	0.611474	0.43176	0.251413	0.514817	0.210462	0.154195	0.320974	0.044123	0.180786	0.0859487	0.0696767	0.0956535	0.110013	0	0.0783665	0.0490419	0	0.0527775	0.0256877	0	0.111887	0
Nit1	2.41181	2.78741	2.5509	2.10514	2.70597	2.1635	3.54123	3.49074	2.53342	3.16875	3.74154	2.47492	3.74095	3.5774	2.69248	3.80379	3.69506	2.92563	2.6399	2.48245	2.42829	3.31131	2.55436	2.17756
Pax5	0.00191968	0.00447774	0.00996586	0.00305548	0.00560717	0.00409068	0	0	0.000403817	0.00208167	0.000341171	0	0.00394471	0.000451281	0.000346019	0.0031924	0.00665502	0.000925494	0.0021427	0	0.000484764	0.000867357	0.00052787	0.000559691
Prdm15	0.273584	0.392528	0.437218	0.255319	0.405966	0.3932	0.359369	0.375917	0.233512	0.344477	0.368338	0.233235	0.29929	0.408095	0.230955	0.35939	0.288854	0.28894	0.129617	0.19147	0.161036	0.141397	0.107161	0.117064
Rnf168	1.58133	1.17593	1.2312	1.15984	1.11602	1.28344	1.22817	1.26237	1.06049	1.37719	1.33207	1.14343	1.59246	1.12221	1.05614	1.30085	1.13708	1.1579	0.796759	0.787006	0.706012	0.873504	0.785148	0.667717
Tctex1d2	1.21415	0.982369	1.04707	1.02665	0.843973	1.01064	0.660713	0.738086	0.534752	0.419666	0.795695	0.665206	1.08287	1.0525	0.738613	1.0348	0.869594	0.777419	0.94582	1.06302	0.843153	1.06288	0.83466	0.475674
Chp1	1.04252	0.932514	0.998215	1.0942	1.0062	1.019	1.37856	1.29628	1.30055	1.40967	1.36946	1.31936	1.40954	1.20194	1.2631	1.02816	1.34963	1.16474	1.27832	1.15233	1.51318	1.30866	1.39347	1.11008
Sval2	0	0	0	0	0	0	0	0	0	0	0	0	0	0	0	0	0	0	0	0	0	0	0	0
Trpv4	0.458758	0.458601	0.424389	0.508522	0.393158	0.586543	0.184745	0.141561	0.150957	0.304876	0.146757	0.215956	0.152626	0.0855057	0.10986	0.173289	0.0889859	0.139811	0.0146301	0.00765054	0.0198594	0.0155458	0.0405476	0.0372596
Klhl3	0.251609	0.227419	0.241476	0.219428	0.231076	0.275619	0.0661554	0.0635654	0.021171	0.0798057	0.0972586	0.0538118	0.178086	0.194451	0.091271	0.210257	0.194441	0.167549	0.063189	0.0489534	0.0730677	0.0561309	0.0804298	0.0485994
Tvp23b	1.13355	1.05391	0.931776	0.78048	0.931478	0.714981	0.802065	0.866364	0.620906	0.710587	0.874301	0.784905	0.634669	0.597325	0.468329	0.571877	0.469136	0.444409	0.916944	0.921827	0.624759	0.867514	0.816901	0.80766
Dnajc7	2.32286	2.38473	2.28745	2.11956	2.08906	1.91212	2.05402	2.12467	2.05224	2.63756	2.12406	2.42976	1.57798	1.70999	1.5503	1.80656	1.48001	1.40367	1.02288	1.20352	0.988339	1.27668	0.889853	0.862783
Zfp385c	0.0457726	0.0384359	0.0300157	0.0728544	0.0234483	0.0365765	0	0	0	0.00119124	0.000976177	0.00232045	0	0	0.00099005	0	0.00105787	0.0145644	0.00204361	0	0.00554814	0.0037226	0	0.0080071
Cacybp	1.01792	1.3138	0.825112	0.9001	1.1283	0.659767	1.33381	1.49154	0.984977	1.94271	1.85731	1.62695	1.46418	2.18554	1.3455	2.31347	1.83631	1.92209	1.08568	1.6812	1.03676	1.41042	0.988997	1.18711
Cluap1	1.08391	0.763619	0.783061	0.731022	0.730608	0.786868	0.803897	0.701755	0.517072	0.805624	0.726787	0.740413	0.885883	0.860293	0.506643	0.700233	0.681464	0.422476	1.17702	1.01511	0.771031	0.918874	0.712289	0.575258
Zswim7	0.34434	0.276218	0.419939	0.253985	0.260408	0.308715	0.547349	0.630164	0.312703	0.601075	0.676151	0.500274	0.661553	0.722606	0.372399	0.662018	0.635686	0.680231	1.03117	0.7059	0.642609	0.887948	0.665109	0.602361
Pigl	0.203896	0.274953	0.243734	0.329603	0.246239	0.298707	0.330668	0.34931	0.337764	0.364815	0.412193	0.337821	0.202216	0.244153	0.341102	0.313644	0.311701	0.301042	0.120904	0.229756	0.25905	0.296526	0.21025	0.180197
Ndufa2	6.83708	7.55026	5.56054	10.4572	9.25307	6.53054	12.6537	11.2544	5.62929	13.5189	15.0654	9.40984	21.8423	26.6706	9.44496	19.6665	20.9555	13.2878	40.4821	35.1264	23.1866	32.4361	26.1297	12.7078
Pam16	0.097599	0.068296	0.114288	0.0665762	0.19736	0.133698	0.223562	0.23248	0.211171	0.29936	0.21558	0.176707	0.448858	0.275324	0.376972	0.236502	0.378628	0.292402	0.233438	0.466586	0.190126	0.302382	0.333552	0.207317
Glis2	0.0747445	0.0798314	0.0612677	0.0751375	0.0875048	0.0691585	0.722344	0.739422	0.839109	0.854879	0.803318	0.680558	1.14789	1.09865	1.36782	1.15009	0.966012	0.944493	0.979181	1.11747	1.07288	1.00781	0.954094	0.829244
Cox6c	1.99041	1.54084	1.19803	1.95134	1.58793	1.11413	3.0786	2.60898	1.66871	3.44712	3.51177	2.68103	4.67621	4.7062	2.09541	3.8377	3.81678	3.33076	8.25336	6.82469	3.98457	6.30822	5.68735	3.97808
Bicc1	0.00250873	0.00280882	0.00123384	0.00359374	0.00101461	0.00160377	0.0430807	0.0361263	0.0601609	0.0440708	0.0425348	0.045785	0.0453651	0.045647	0.0613175	0.0365465	0.0255114	0.0399128	0.029682	0.0171812	0.0171048	0.0306046	0.0173841	0.0206263
Ube2z	3.11085	2.32043	2.66388	2.6706	2.81962	2.7556	1.6022	1.74071	0.948163	1.72686	1.42569	1.1744	2.60229	1.83448	0.98425	1.76332	1.91596	1.48381	1.80262	1.68955	1.59452	1.70461	1.4633	1.30258
Gip	0	0	0.0154978	0	0	0	0	0.0143295	0.0119314	0	0	0	0	0	0	0	0	0	0	0	0	0	0	0
Tmem87b	3.62367	4.00374	5.37188	3.25542	3.45767	4.21471	1.55624	1.54516	1.8344	1.43128	1.26055	1.59198	0.96174	0.846443	1.05797	0.826811	0.824564	1.04629	0.352347	0.319884	0.318859	0.392228	0.360775	0.307744
Anapc1	2.22666	2.27801	2.74407	2.03026	2.08651	2.34209	3.01687	3.04419	2.50466	3.54677	2.87284	2.74309	2.83019	2.81857	2.16945	2.94288	2.55707	2.58104	1.33879	1.49114	1.54821	1.87176	1.11631	1.29389
Mertk	11.9696	10.4402	14.5587	9.43659	10.4173	12.0995	0.184527	0.170725	0.170296	0.252202	0.196307	0.306502	0.374376	0.246761	0.152723	0.362813	0.342227	0.484562	2.61639	2.99979	3.76815	2.98822	3.00902	4.01852
Tsg101	0.662819	0.640762	0.709757	0.853743	0.619801	0.777642	0.693596	0.659158	0.488401	0.802671	0.743555	0.699227	0.761045	0.689013	0.484793	0.737811	0.648611	0.579069	0.654294	0.635103	0.574693	0.498551	0.398233	0.355218
Hps5	1.74609	1.89468	2.14552	1.66591	1.57977	1.85149	1.8201	2.01416	1.70447	1.8355	1.73375	1.70309	1.00848	0.96771	1.13555	0.722876	0.75617	0.972983	0.611141	0.818449	0.766355	0.773839	0.683023	0.531467
Map3k4	0.808177	0.7434	0.925306	0.700227	0.817128	0.81976	0.61759	0.580908	0.440916	0.648797	0.576146	0.44027	0.728565	0.638908	0.476489	0.729654	0.585953	0.570302	0.331728	0.401722	0.2449	0.394895	0.321517	0.225746
Piezo1	0.940459	1.14898	1.08568	1.24831	1.29544	1.23706	0.010594	0.0206977	0.0301594	0.0388677	0.0136503	0.0173055	0.0479331	0.0421303	0.0249197	0.0919646	0.0335301	0.0407321	0.114307	0.0624312	0.0866333	0.123774	0.0872967	0.0895734
Blk	0.0161328	0.0112891	0	0.0106991	0.00543716	0.0042972	0	0	0	0	0	0	0	0	0	0	0	0	0	0	0	0	0	0
Rnf166	5.94418	5.06521	5.38323	5.56031	5.46879	5.79379	1.07857	1.0627	0.71091	1.29435	1.21402	0.85056	1.86337	1.62274	0.661001	1.62625	1.93189	1.36065	1.96635	1.66947	1.98828	1.88433	1.99701	1.03773
Ankrd28	0.234302	0.175306	0.276265	0.243838	0.20774	0.318289	3.70187	3.65129	3.84437	3.68561	3.31187	4.384	1.87584	1.96889	2.13485	1.74169	1.4756	2.0528	0.370154	0.408871	0.503826	0.473329	0.409611	0.450856
Ankrd52	2.33263	2.44843	3.12404	2.64684	2.77691	3.31309	1.89541	1.93615	1.64537	2.06355	1.99792	1.39711	2.43786	2.60027	2.09751	2.3988	3.21942	2.53302	2.21308	2.57371	3.09818	3.07257	3.19055	2.16531
Pkd2l2	0.0700537	0.0746984	0.114845	0.0902632	0.0786994	0.058645	0.0483125	0.0328677	0.0673655	0.0520901	0.0658076	0.0443923	0.038844	0.05411	0.0577235	0.0599133	0.0501133	0.0361858	0.0148937	0.0181729	0.0227445	0.0361735	0.0110075	0.0350132
Srp19	4.09107	4.20741	3.72603	3.66688	4.15031	2.80684	10.4841	10.8679	8.61885	10.1228	11.479	10.3568	9.99171	10.5499	8.48018	8.10221	8.41645	8.27783	7.97959	9.05307	5.7446	7.40776	6.71562	4.66263
Tmbim7	0.00407795	0.00285359	0.00334267	0	0.00274874	0	0	0	0	0.00265322	0.00652268	0	0	0	0	0	0.00706856	0	0	0.00317364	0	0	0	0
Clec4f	0	0	0	0	0	0	0	0	0	0	0	0	0	0	0	0	0	0	0	0	0	0	0	0
Klra17	0	0	0.00214023	0	0	0	0	0	0	0	0	0	0	0	0.00141188	0	0.00150861	0	0	0	0	0	0	0
Wdfy2	1.52122	1.52655	1.6749	1.54823	1.49569	1.27081	0.619039	0.654665	0.712876	0.523909	0.544972	0.599066	0.286623	0.300526	0.497185	0.208765	0.225696	0.237368	0.17033	0.217355	0.21667	0.206846	0.153597	0.167892
Rbsn	1.88299	1.48862	1.59873	1.64605	1.58441	1.30608	2.28128	2.42325	1.75187	2.64211	2.21677	2.18092	2.27657	2.01126	1.45102	2.26973	1.64778	1.89177	1.01561	1.20316	0.919086	1.23905	1.01471	0.969029
Mrps25	0.688117	0.842656	0.658054	0.704088	0.662608	0.379672	1.12708	1.03685	0.604847	1.28983	1.26225	0.840959	1.58233	1.47898	0.704323	1.20972	1.18802	0.764201	2.02073	1.54282	1.09224	1.54343	1.27045	0.838318
Dguok	1.75926	1.36163	1.48211	1.46371	1.17684	1.51586	0.739912	0.666676	0.613981	0.673477	0.701115	0.568673	0.699883	0.667348	0.658228	0.514199	0.65455	0.50118	0.674382	0.643077	0.491371	0.641318	0.388471	0.314745
Camta1	0.020761	0.0217476	0.0211432	0.0205276	0.0232384	0.0257395	0.0311738	0.0411967	0.0376373	0.0495281	0.0557478	0.0483982	0.0965262	0.112607	0.0580369	0.128308	0.155214	0.103912	0.041009	0.0341747	0.0343154	0.0391414	0.0473311	0.0401695
Csf1	1.0648	0.972064	1.36941	1.44642	1.84795	2.47927	3.98822	4.34584	6.14806	2.50041	3.32473	3.92831	1.99521	1.79967	5.97955	1.15404	1.56989	2.21271	2.93028	3.70999	4.2651	4.17646	3.97799	3.57013
Strip1	2.49951	2.62142	2.48097	2.19649	2.88882	2.62182	3.06689	2.43028	1.68304	3.53901	3.04229	2.15381	4.68585	4.11165	1.92175	5.11793	4.21071	3.18003	3.42679	3.8615	3.0964	4.26233	3.32569	2.55511
Kif1a	0.333923	0.328864	0.290611	0.311677	0.514073	0.474374	16.6512	16.4784	18.7808	11.0024	12.445	13.1595	12.3106	11.6711	19.016	9.2949	12.9934	11.5861	6.49263	7.38447	8.45938	7.98049	8.23897	7.30293
Alx3	0	0.00773988	0	0	0.00745549	0.00883856	0	0	0	0	0	0	0.00757614	0.0078005	0	0	0	0	0	0.00860796	0.0586549	0.172414	0.310228	0.357953
Slc25a11	26.8611	28.4732	22.5817	27.5133	29.9159	22.0431	19.0053	17.5596	11.9481	20.7034	22.9104	15.7828	18.2995	16.6969	14.016	17.6631	19.9125	15.2101	28.8503	23.8345	20.0475	24.829	21.0536	18.5232
Chrne	0.0274285	0	0	0.0218284	0.0184882	0	0.014187	0.0415764	0.0865463	0	0.0438719	0.0173812	0.0187873	0.0193437	0.103823	0	0	0	0	0	0.0623369	0.148714	0	0.0239906
Cmc2	0.166829	0.154808	0.0891842	0.155858	0.102673	0.113025	0.333906	0.283117	0.196829	0.377543	0.378995	0.229822	0.489377	0.562698	0.196113	0.481288	0.372994	0.270138	0.595064	0.440306	0.335194	0.439974	0.451762	0.17764
Chfr	1.41775	1.32585	1.65555	1.50526	1.3237	1.48777	2.10296	2.21137	1.85997	2.0439	2.15545	1.9615	1.41722	1.39887	1.54573	1.32272	1.37413	1.2679	0.385518	0.445438	0.441081	0.421351	0.534573	0.330872
Ceacam16	0	0.00903771	0	0.0102785	0	0.0206412	0	0	0	0.00840313	0	0.0163687	0	0	0	0.0128869	0	0	0	0.0100513	0	0	0	0
Hoxa2	0	0	0	0	0	0	0	0	0	0	0	0	0	0	0	0	0	0	0	0	0	0	0	0
Adam28	0.00238578	0	0	0	0	0	0	0	0	0.00465677	0	0	0	0	0	0.00238051	0	0	0	0	0	0	0	0
Ankrd53	0.0209165	0.0292732	0.0171452	0.016646	0	0.0334285	0.0432752	0.0317055	0.145197	0.0408266	0.133824	0	0.0429808	0.0295024	0.0339314	0.125222	0.0483412	0.060504	0.0233465	0.0162782	0	0.0425275	0.0172547	0.0731794
Tex261	13.6894	14.393	11.9946	13.229	16.6393	13.8316	11.2599	10.1153	6.69033	12.8913	11.5426	8.7727	13.5833	10.7795	7.9405	11.5025	11.1706	11.3635	9.95677	9.97285	10.9685	9.59171	9.35411	7.18717
Fam120b	2.6961	2.64528	3.04914	2.48722	2.52665	2.73115	1.79249	1.67712	1.32021	2.21131	2.00025	1.63596	2.04488	2.0763	1.41148	1.96685	1.91599	1.68761	1.28819	1.40789	1.18743	1.49971	1.29826	1.20689
Tbp	1.28062	1.2289	1.30959	1.05899	1.22592	1.18667	1.17374	1.08441	1.21882	1.40316	1.16318	1.16309	1.38862	1.33266	1.12558	1.49423	1.42924	1.20061	1.03364	1.08429	1.19137	1.11105	1.05987	0.820928
Psmb1	1.60034	1.6781	1.25664	2.03852	1.92418	1.50923	3.29113	2.7864	1.96222	2.91417	3.32842	2.51854	3.72958	3.79258	2.35963	3.29909	3.21824	3.09308	4.1572	2.89109	2.6723	3.49808	3.38566	2.17319
Pdcd2	0	0	0	0	0	0	0	0	0	0	0	0	0	0	0	0	0	0	0	0	0	0	0	0
Dll1	0.099893	0.11359	0.0818818	0.188807	0.143082	0.0898017	1.41442	1.14511	0.417635	2.51036	1.90403	1.34515	4.60996	4.46469	1.79605	5.03345	2.89306	3.89186	0.613239	0.349835	0.822974	0.74471	0.50473	0.436862
Nol3	0.0204945	0.0430238	0.100796	0.0326203	0.0276287	0.049131	1.31447	1.42903	2.01762	0.866729	1.43144	0.857153	2.20394	1.76334	3.33577	1.3292	2.14331	1.23013	0.571887	0.653939	0.574462	0.263907	0.912956	0.071703
Fhod1	2.96645	2.9256	2.92931	3.0202	2.93748	2.75459	0.0752457	0.0767006	0.107772	0.15638	0.121403	0.0641299	0.18196	0.147203	0.0855058	0.214576	0.146181	0.118925	0.360053	0.206742	0.325833	0.368656	0.380895	0.199162
Plekhg4	0.0123955	0	0.020321	0.00986468	0.0167103	0.0198102	0.0384684	0.10334	0.0156448	0.0887131	0.0660885	0.0235646	0.178298	0.0961598	0.12065	0.32157	0.272154	0.197206	0.0415065	0	0.00939041	0.0672066	0	0
Slc9a5	0.112984	0.169983	0.162072	0.220294	0.102812	0.185083	0.224992	0.201233	0.0748655	0.415334	0.343364	0.103815	1.0138	0.904379	0.277984	1.05406	0.812744	0.686326	0.182859	0.241805	0.256779	0.256519	0.177088	0.108705
Elmo3	0.783257	0.773778	0.811981	0.623339	0.667707	0.736346	0.440876	0.296817	0.363447	0.434666	0.343911	0.262769	0.347145	0.276193	0.249142	0.367777	0.439245	0.216573	0.411413	0.358567	0.732987	0.90555	0.494102	0.382841
Stc1	0.00945788	0.0132365	0.00775258	0.00752686	0.0127502	0.00755772	0.0391357	0.0430091	0.0238743	0.110764	0.080682	0.0539403	0.181391	0.153412	0.0664857	0.235924	0.360666	0.0889144	0.0950098	0.0809659	0.035825	0.0448695	0.226261	0.0248173
4931428F04Rik	0.188547	0.0967547	0.113338	0.130045	0.194872	0.140622	0.546133	0.552551	0.380756	0.42527	0.583058	0.398269	0.602685	0.886477	0.278679	0.664728	0.479337	0.42723	0.0982109	0.234777	0.314243	0.119266	0.114062	0.109943
Tppp3	0.147344	0.350559	0.26571	0.257974	0.139044	0.329676	19.8303	22.0219	26.8724	5.04256	17.0159	10.5322	11.7072	15.8156	37.0809	1.94064	9.92657	8.63083	5.95352	5.89402	6.49647	6.89034	5.95589	3.19613
Msh3	0.181015	0.158624	0.289267	0.17908	0.14496	0.21498	0.259408	0.271237	0.324357	0.300916	0.23198	0.328862	0.147306	0.161038	0.206092	0.191385	0.147287	0.179541	0.0639497	0.0730216	0.0849205	0.0973559	0.0883619	0.0929622
Adamts13	0	0	0.00807071	0	0.00221223	0.0183583	0	0	0	0	0	0.00415954	0	0.0023146	0.00177472	0	0.00948148	0.00474682	0.00366328	0.00510839	0	0.0155702	0	0.00287063
Tmem208	3.00303	3.28345	2.46157	2.9447	3.64174	2.41041	4.37554	4.32849	2.50426	4.18683	4.05283	2.65059	6.00556	6.38196	3.38548	4.9494	4.57017	3.79074	5.73117	5.08109	3.46329	4.96094	4.91036	2.48592
E2f4	5.61315	5.22277	5.25837	5.17891	5.78965	5.22478	3.19047	3.59974	2.22852	4.2039	5.21264	3.87947	3.73914	4.20876	2.64336	4.00053	3.94709	3.05556	2.99493	2.78426	3.22431	3.21896	3.44741	2.30643
Surf4	7.10279	7.05418	7.204	7.85918	8.91769	6.94087	6.87847	5.84374	4.22313	6.57557	5.84928	4.7233	6.00812	5.99292	4.30354	5.89168	6.19541	5.06839	8.85448	7.41911	7.25443	8.26466	6.35348	5.69607
Surf2	10.4023	10.8315	12.739	9.7656	10.1816	10.9753	8.48951	9.37104	7.25245	11.7326	10.9595	10.8351	9.9197	8.41239	7.25857	7.4271	7.23397	6.44145	6.08349	6.20495	6.60636	7.28217	5.60089	5.12129
Dnajb9	4.66216	7.15286	8.62403	4.16663	7.02448	6.33534	3.84284	3.439	3.41414	4.20124	4.25362	3.50732	4.66199	4.39566	3.73437	4.30359	4.06221	5.01216	6.42821	6.5969	7.25268	5.03525	7.404	7.52323
Naf1	0.0822421	0.137023	0.102725	0.140252	0.0950319	0.0844959	0.13977	0.127632	0.0889721	0.193652	0.150339	0.15883	0.158267	0.223717	0.10165	0.226643	0.190074	0.195415	0.118024	0.173726	0.118674	0.180486	0.0969202	0.195249
Yes1	0.483936	0.473438	0.505799	0.390116	0.411705	0.407984	0.357238	0.379834	0.395335	0.669464	0.529397	0.788993	0.242438	0.237468	0.202404	0.253153	0.219889	0.298998	0.190541	0.191357	0.160171	0.20167	0.195085	0.17123
Ppp1cb	2.37736	2.09651	2.18149	1.94847	1.83626	1.60796	4.29436	5.01341	3.98239	6.27421	6.32899	7.8449	2.2439	2.35327	1.83398	1.90052	2.47179	2.14462	1.82488	1.91647	1.63812	1.6937	1.5194	1.90196
Gorasp2	1.10561	1.22809	1.15621	1.26888	1.27083	1.14388	2.0226	1.84173	1.78616	2.04748	2.04269	2.08415	2.09811	2.00595	2.23409	2.03216	1.81825	1.998	1.33538	1.19556	1.52351	1.45761	1.22312	1.15637
Tsen15	0.424642	0.484821	0.494636	0.361658	0.331424	0.440532	0.231201	0.180681	0.155145	0.315061	0.35351	0.245487	0.510284	0.457094	0.153082	0.520338	0.37879	0.355572	0.740067	0.487016	0.502297	0.580638	0.460922	0.332321
Oc90	0.00654016	0	0	0.00260242	0	0.00261309	0.00169141	0.00743523	0	0	0	0.00207222	0.00223986	0	0.00176827	0	0	0.00236479	0	0	0	0	0	0.00858062
Efr3a	1.52973	1.5084	1.56823	1.45609	1.28681	1.4336	0.444139	0.541809	0.440765	0.589864	0.560041	0.577111	0.632244	0.625856	0.390268	0.661371	0.570511	0.617989	0.394378	0.429518	0.43367	0.524407	0.367166	0.513876
Trappc2l	4.40352	3.71095	3.70657	4.10737	3.95759	4.48366	3.46548	2.8171	1.85261	3.43498	3.95088	2.95549	3.81082	4.05725	2.44519	3.0473	3.33768	2.65371	3.62026	3.62969	2.85172	3.27323	2.55845	1.69801
Acsf3	0.137367	0.0745452	0.126387	0.138324	0.170067	0.152332	0.191404	0.199724	0.152146	0.238941	0.183846	0.200744	0.293793	0.203639	0.11521	0.223777	0.242966	0.162185	0.328555	0.211628	0.261224	0.292595	0.319142	0.147122
Ddx19a	1.0684	0.900796	1.05091	1.25673	0.91688	1.06615	1.07288	0.908495	0.792634	1.59371	1.25042	1.20875	1.36009	1.3967	0.89055	1.50805	1.16234	1.4548	0.942382	0.953154	1.24764	1.04552	0.842663	0.961838
Galns	0.465073	0.435589	0.489719	0.640591	0.610085	0.628923	0.0888197	0.100322	0.0519257	0.083794	0.0877402	0.0861467	0.149476	0.133719	0.110267	0.182049	0.109552	0.100897	0.111807	0.0640356	0.0975669	0.162447	0.079682	0.10326
Gata2	0	0.0443007	0.0222401	0	0.0243845	0.0433621	0.0187117	0.0205636	0.0114148	0.0058843	0.0385758	0.0286556	0.0247791	0.0255129	0.00489051	0.0631683	0.0209021	0.0130806	0.0302842	0.0633462	0.0411089	0	0.0298429	0.0158209
C8g	0.116214	0.379501	0.190519	0.277459	0.235001	0.309551	0.100183	0.411035	0.171123	0.252039	0.227191	0.44186	0.291871	0.300515	0.167578	0.618435	0.290969	0.196096	0.345906	0.994867	0.763011	0.682603	0.671078	0.508237
Entpd2	0.0436379	0.0458041	0.0357697	0.0173641	0.0882423	0.0871767	0.10157	0.214977	0.0137692	0.21294	0.18613	0.165917	0.597801	0.723218	0.271364	0.892599	0.769009	0.646922	32.8776	24.1802	24.3642	31.1127	30.7605	21.0117
Rabl6	2.80075	3.10772	3.52195	3.31185	3.48356	3.60845	4.6111	4.48911	4.24367	4.58441	5.06368	3.44921	4.31878	4.45982	4.48298	3.58503	4.72277	3.56887	2.95968	3.38374	3.06084	3.4647	3.16386	2.40894
Ptgds	1.81637	5.85669	2.53984	2.60761	3.36089	2.476	3.81325	4.66977	3.8658	17.7731	65.1696	34.2371	10.3434	19.5413	4.98799	32.6224	57.5977	22.1755	7.63252	9.28528	6.85315	11.8274	9.98922	7.25822
Edf1	9.03636	13.1572	6.69395	11.9484	13.1655	7.93848	13.6009	13.0593	8.35902	16.9441	20.7079	12.0571	19.5296	23.7298	13.5513	21.3649	25.5542	16.8848	25.2467	26.7977	21.3023	27.2738	27.5025	18.3602
Clic3	0.12265	0.343302	0.45241	0.146413	0.537369	0.245021	0.729549	0.60422	0.348302	0.279298	0.261571	0.38861	0.420049	0.345991	0.364772	0.673083	0.708655	0.79826	0.958291	0.143177	0.882699	0.166248	0.101178	0.590023
Npdc1	0.187475	0.131188	0.115255	0.149198	0.221144	0.187263	6.6727	6.41175	4.09647	8.46213	8.07766	5.50941	13.4512	15.5932	6.76052	14.24	13.3506	10.668	9.62575	9.22828	9.12514	10.9588	9.13428	6.08766
Fbxw5	7.30054	7.73341	6.74772	7.85349	9.07826	7.88569	13.5289	14.0999	10.5329	15.8058	17.3279	13.815	14.9154	14.0256	13.4086	15.3475	14.749	14.8553	18.4891	13.8905	19.2429	20.1837	15.3053	16.0518
Slc25a13	0.0324213	0.0420658	0.0453999	0.0392403	0.0327804	0.0410204	0.0122278	0.00870268	0.01023	0.0153812	0.0147651	0.0111286	0.027759	0.0290574	0.0138792	0.0289799	0.0234158	0.0234458	0.00603131	0.00683358	0.00460525	0.00732434	0.00612915	0.0153604
Ube2i	8.76439	7.1606	13.1415	9.23791	6.71465	13.8277	3.87045	4.17554	4.05522	6.46916	3.42113	5.76136	2.81902	2.55948	2.20526	4.28384	1.77265	3.3077	1.73309	1.7689	2.14707	2.46599	1.34261	1.39082
Tsr3	2.03506	1.55064	2.37245	1.8715	2.34719	1.77075	3.43853	3.35897	1.9692	4.0899	3.32742	3.1237	4.46058	4.40132	2.15199	3.83551	2.53457	3.56473	4.94679	3.83626	3.73434	4.62809	4.47677	2.68976
Unkl	0.100662	0.104755	0.0952059	0.108867	0.165278	0.0928129	0.0974567	0.0762919	0.0716684	0.132666	0.108715	0.116127	0.130826	0.211152	0.0935115	0.121042	0.165535	0.12879	0.12388	0.100435	0.140784	0.173178	0.144786	0.126423
Lrrk1	0.597043	0.603242	0.647496	0.507954	0.644594	0.622397	0.00342703	0.00613752	0.00929161	0.0124535	0.00706514	0.00653115	0.00655529	0.0129797	0.00597128	0.0080801	0.0097832	0.0122447	0.0246512	0.0395321	0.0206352	0.0139702	0.0091095	0.0122343
Aldh1a3	0.00973443	0.0158942	0.021278	0.00774695	0.00656149	0.0129645	0	0.00245926	0	0	0.00519007	0	0.0111128	0.00915351	0	0.00647528	0.00187481	0.00234652	0	0	0	0.00219912	0	0
Actn1	0.340575	0.401383	0.4198	0.391275	0.412525	0.300798	0.0496686	0.0698679	0.0307037	0.0608115	0.0819171	0.0665305	0.139441	0.151697	0.046387	0.158413	0.165709	0.102775	0.161488	0.191314	0.182352	0.255116	0.226028	0.0951895
Sirt2	11.0739	11.6748	10.8011	12.087	12.7292	11.907	279.547	290.82	260.885	321.388	408.175	368.635	131.717	133.817	242.477	68.1839	152.433	156.252	31.2246	34.595	29.3561	24.4147	27.6381	17.5986
Hnrnpl	7.97514	6.65926	9.23439	8.00075	7.75703	10.663	9.74154	9.7196	8.59028	12.7158	9.86611	10.4752	6.98694	7.23661	5.49247	7.80199	6.99445	7.03849	6.45635	6.50985	5.24796	7.0365	6.50751	4.62006
Nolc1	5.00373	4.68002	5.6333	4.13866	4.59093	4.72543	7.07121	6.62497	4.52318	8.23089	6.55484	7.05057	6.08837	5.72244	2.93841	5.49561	4.96529	4.61425	4.37746	4.64998	3.05488	4.51604	3.38738	2.5055
Casd1	2.65839	2.47445	3.06353	2.02887	2.46078	2.43032	1.02512	0.919482	1.04433	1.29494	1.15804	1.22226	0.970755	0.906848	0.7966	1.0571	0.977151	0.994577	0.517939	0.737486	0.660716	0.735071	0.747139	0.740833
Cnksr3	0.0267865	0.0731914	0.061688	0.051771	0.0662032	0.0509639	2.18842	2.22738	1.75963	1.02078	1.73488	1.57619	0.434226	0.496562	0.711125	0.162909	0.547587	0.504566	0.139526	0.135998	0.129486	0.109789	0.144157	0.0892536
Mtmr1	0.646244	0.595826	0.792794	0.655037	0.509182	0.591427	0.568018	0.562598	0.531824	0.715925	0.598316	0.585223	0.70136	0.765243	0.481677	0.81909	0.537381	0.604698	0.341165	0.460457	0.425069	0.421705	0.3476	0.353277
Hmgb3	0.0749355	0.017479	0.102374	0.238544	0.0841838	0.179641	1.18862	0.946567	0.441368	1.9177	1.10537	1.09217	2.77169	1.79682	0.729376	3.11541	1.50095	1.39089	2.53711	1.53571	1.55168	2.67475	1.27755	1.39825
Map2	0.254759	0.231783	0.170923	0.263604	0.266122	0.291686	1.41844	1.51569	1.07573	2.57453	1.85752	1.76145	1.92558	1.88133	1.06481	2.56503	2.06975	2.0108	0.844632	0.760189	0.767612	1.0227	0.791123	0.930589
Cyp2j9	0.0308042	0.0502964	0.012625	0.0408581	0.0657513	0.0451282	1.62517	1.52921	0.84562	2.43845	2.2829	1.89672	3.11218	2.81331	1.21597	2.84821	2.66381	3.05558	9.20315	9.43344	9.4862	7.23738	9.94008	8.32545
Nipsnap3a	0	0	0	0	0	0	0	0	0	0	0	0	0	0	0	0	0	0	0	0	0	0	0	0
Abca1	7.30624	6.05695	8.57474	7.23793	7.5792	8.21063	0.877988	0.691395	0.460086	1.14514	0.792635	0.898912	0.998118	0.911471	0.514197	0.959827	0.828122	1.20091	2.04775	2.04459	2.2225	2.82677	2.1103	2.24073
Nipsnap3b	2.22985	2.38548	1.90436	2.34134	2.24274	1.94045	3.67748	3.49506	3.57323	3.60802	3.95257	3.61767	2.27904	2.40416	2.80928	2.51615	2.14505	2.25418	1.19885	1.17206	0.59257	1.32926	1.1268	0.91902
Lage3	5.83582	5.75266	3.61889	5.12894	4.994	2.83857	9.05551	7.49987	5.70033	10.0702	9.90257	6.52795	10.7405	14.4585	5.92719	11.6458	11.2884	7.70652	14.387	12.4403	8.88051	14.5136	11.3865	7.36803
Ubl4a	3.31189	3.49293	3.57203	3.45541	3.62094	3.69751	6.50788	7.55432	5.27007	6.91806	8.54169	6.94884	7.26138	7.35349	5.72397	6.18223	7.49862	6.71525	8.86134	7.14042	7.8991	8.2695	9.63419	5.61338
Gdi1	39.3562	39.1351	45.4309	36.3503	32.3168	34.673	70.7954	74.6035	65.8772	61.7118	68.5261	60.8404	58.6704	50.3582	55.3621	47.6655	50.7612	46.0407	41.8218	38.0939	38.0525	41.2593	35.7656	33.0452
Sash1	0.203821	0.19186	0.20869	0.262647	0.209256	0.249234	1.43916	1.2545	0.905408	2.04438	1.3346	1.48464	1.18891	1.07782	0.799743	1.31431	1.03013	1.30505	2.06612	2.32627	2.34744	2.70472	2.28093	2.52755
Gadd45b	0.167313	0.7415	0.685726	0.221921	0.827031	0.534793	0.0865403	0.169076	0.0351952	0.435433	1.12994	0.49478	0.267405	1.10129	0.180946	0.779066	1.41784	0.645301	1.18275	1.3021	0.591503	1.09614	2.20834	1.26829
Slamf6	0.36666	0.513148	0.549185	0.305062	0.460592	0.607298	0.00172409	0	0.00420704	0.00433743	0.00177719	0.0147858	0.00228315	0	0	0	0.00192592	0.00482098	0.00372051	0	0.00252518	0	0.00274972	0
Slamf1	0.345477	0.195355	0.283186	0.208289	0.270504	0.281645	0.00180499	0	0	0	0	0.00442274	0	0.00246106	0	0.00348196	0.00201629	0	0	0	0	0	0	0
Zdhhc12	1.93391	1.41479	1.83741	2.02877	2.28122	1.86147	5.86535	6.49582	4.24377	6.1483	7.61606	5.04126	4.63626	5.14553	5.58526	1.97349	4.41877	3.84596	4.90587	3.28376	4.02895	3.54479	3.66204	2.96015
Endog	0.322956	0.193707	0.0378179	0.11015	0.217688	0.221204	0.429544	0.279737	0.203807	0.360212	0.393575	0.409307	0.979648	1.10627	0.324324	0.966726	0.853027	0.367005	3.65625	1.83118	1.18835	2.31385	1.82686	0.928137
Cybb	1.75831	1.65795	2.20736	1.73969	1.25383	1.8083	0.0058524	0	0.00856844	0.013251	0.00723917	0.0129061	0.00310004	0.00478778	0.00244735	0.00451589	0.002615	0.0180012	0.00757753	0	0.00171434	0.0138031	0.00373355	0.00989655
Golga7	2.65231	2.49051	2.96691	2.25511	2.30222	2.5542	17.1543	18.3896	19.7707	12.296	14.6892	19.5225	8.84551	8.13757	14.4934	5.01393	6.04693	8.54651	3.1207	3.2403	2.51307	2.72451	2.66796	3.14604
Xk	0.0968532	0.100634	0.101042	0.0934287	0.098915	0.114919	0.212529	0.233563	0.188919	0.383821	0.34113	0.288276	0.333712	0.380852	0.228536	0.453911	0.354417	0.420243	0.0884497	0.118773	0.0889369	0.0934883	0.104109	0.115519
Pcolce2	0	0.00137474	0.00322072	0.00156348	0.00264846	0	0.111777	0.0982721	0.0867852	0.145716	0.114172	0.0697166	0.289316	0.308969	0.116857	0.223468	0.108971	0.137809	0.0811345	0.062686	0.0506025	0.0292923	0.0664467	0.0189018
Cd48	1.79941	2.74725	2.24597	2.01378	2.67732	2.45095	0.0105764	0.0116231	0.00967796	0.0232818	0.00817656	0.0485908	0.00700293	0.00360516	0.00552851	0	0	0.0258773	0	0.0198917	0	0.00346454	0.00421701	0.00894244
Clpx	1.90689	1.65654	1.94313	1.60331	1.46582	1.42202	1.18392	1.13343	1.04265	1.29379	1.10025	1.37391	1.10485	0.957954	0.89695	1.25759	0.820674	0.977571	0.896563	0.980881	0.734669	1.01575	0.746124	0.971028
Trabd	1.19315	0.855793	0.937268	1.15528	0.918177	1.11234	1.32685	1.40919	0.690212	1.28089	1.37832	0.875801	1.23951	1.46554	0.774226	1.31949	1.10302	1.20798	0.965529	1.10654	0.813504	0.963627	1.37798	0.591374
Mov10l1	0	0	0	0	0	0	0	0	0.00103818	0.00107035	0	0	0	0	0	0	0	0	0	0	0.00124628	0	0	0
Dennd6b	0.665674	0.791882	0.982169	0.893975	0.768394	0.997377	1.45902	1.48202	1.13948	2.1547	1.83225	1.28658	2.65026	2.15952	1.44433	3.2961	2.58175	2.20837	1.37457	1.21743	1.33007	1.55083	1.4003	1.00436
Cd83	2.12355	2.22444	4.89827	2.25675	4.47306	6.05819	0.224364	0.17174	0.0571996	0.41702	0.341733	0.188722	1.39689	1.28302	0.315082	1.25969	0.886554	0.767835	0.0939431	0.120925	0.102998	0.153574	0.0961346	0.107593
Cltrn	0	0	0	0	0	0	0.00204704	0	0.00249753	0	0.00211008	0	0	0	0.00214006	0	0	0	0	0	0	0.00268222	0	0
Ace2	0	0.00338841	0	0.0019268	0	0.00193469	0.00375687	0	0.00305578	0	0.00645429	0.00153424	0.00663344	0.00170747	0	0	0.00839334	0	0	0	0	0.00820436	0.00599177	0.00211765
Gzmb	0.0347305	0	0.0569368	0.0276395	0.0702302	0.0555057	0	0	0	0	0	0	0	0	0	0	0	0	0	0	0	0	0	0
Gzmf	0	0	0	0	0	0	0	0	0	0	0	0	0	0	0	0	0	0	0	0	0	0	0	0
Gzmn	0	0	0	0	0	0	0	0	0	0	0	0	0	0	0	0	0	0	0	0	0	0	0	0
C4a	0.041347	0.0231464	0.0203351	0.0131621	0.0167219	0.046256	0.0213862	0.0188022	0.00521855	0.0161409	0.0176359	0.0157207	0.0339851	0.0291596	0.0223581	0.0330045	0.0191118	0.0239204	0.0461504	0.0257424	0.0438524	0.0336267	0.00682169	0.0216987
Ager	2.78368	1.73148	3.23251	2.61533	1.58968	3.92363	0.259968	0.234418	0.146391	0.301857	0.144294	0.244999	0.26482	0.21813	0.250876	0.424344	0.357417	0.447344	0.172615	0.601773	0.878679	0.838487	0.382725	0.236714
Atf6b	5.21683	5.69609	4.70628	5.61912	6.82061	4.10883	5.07877	5.55586	3.28271	5.92036	5.68276	4.4458	7.12607	6.52305	3.6478	6.10276	7.83869	4.88921	5.25399	5.94995	6.30292	6.63437	6.64079	3.27798
Egfl8	0.589253	0.3489	0.185772	0.324654	0.488844	0.217323	0.164114	0.206122	0.057209	0.0294911	0.145001	0.114893	0.186283	0.0958998	0.073531	0.0904538	0.130947	0.0655576	0.860081	0.811338	1.06449	0.706554	0.860011	0.911854
Notch4	0.671844	0.892218	0.940624	0.710296	0.803241	1.55573	0.0355112	0.0557512	0.0278526	0.0574318	0.0522927	0.0372911	0.0470261	0.0622527	0.0583394	0.0929695	0.0765032	0.11703	0.366737	0.20609	0.237766	0.249269	0.23059	0.321698
Ppt2	0.521614	0.554527	0.394675	0.598725	0.581482	0.368723	0.804206	0.547385	0.462109	0.587382	0.861062	0.508525	1.04437	1.07529	0.520725	0.870771	0.950512	0.703643	0.96289	0.928984	0.843511	0.890587	0.777843	0.526425
Prrt1	0.363853	0.555514	0.433816	0.210593	0.668878	0.607937	3.98639	4.7131	5.48991	5.16508	8.00668	5.8481	10.558	13.0635	8.90747	11.0235	14.4867	7.94157	3.17515	2.80592	4.76112	4.12487	6.05766	3.09569
Rnf5	2.83515	1.88793	1.16198	2.51104	2.18844	0.694281	3.99725	5.96112	4.47293	4.19504	5.41253	2.8398	3.94656	5.64366	3.18982	4.6996	5.49561	3.73678	4.59367	4.6264	5.19634	6.41526	5.09256	3.6397
Fam163a	0.00736697	0.00322195	0.00754834	0.00659571	0.0093107	0.00735861	0.331988	0.331518	0.144702	0.543424	0.550877	0.3192	0.143813	0.116249	0.0637383	0.143338	0.148447	0.159825	0.509816	0.636396	0.820405	0.567936	0.827266	0.819948
Cacfd1	1.68216	1.29631	1.23923	1.17773	1.60032	1.02942	9.66995	8.98897	7.38386	8.34005	7.42473	5.97751	10.4938	7.44834	6.30399	8.12663	7.04957	6.67519	6.28634	4.68967	4.73445	5.64256	4.567	3.37099
Hivep2	0.270022	0.260313	0.229222	0.288394	0.313003	0.31264	0.251796	0.224582	0.150165	0.364304	0.361456	0.27841	0.786383	0.870736	0.396767	0.903632	1.22478	0.860392	0.339335	0.34142	0.39746	0.362964	0.379892	0.376987
2310057J18Rik	0.00848004	0	0	0	0	0	0	0	0	0	0	0	0	0	0	0	0	0	0	0	0	0	0	0
Arnt	2.06866	1.94509	2.41021	2.1745	2.14383	2.0852	0.666053	0.762427	0.779222	0.597916	0.73899	0.54161	0.566	0.492081	0.468305	0.415081	0.456684	0.497746	0.483325	0.544489	0.419722	0.484421	0.458603	0.380399
Itga2	0.00960201	0.0100787	0.0137738	0.0162383	0.00889932	0.0191822	0.0111747	0.00636774	0.00530208	0.00780917	0.0166383	0.0136906	0.00822121	0	0.00584126	0.00598799	0.0138698	0.0104157	0.0214351	0.0149454	0.0181855	0.0211497	0.0217828	0.0157472
Mocs2	3.47934	2.91454	3.74021	3.93448	3.34954	3.38237	7.73277	6.98069	5.73766	8.15722	8.61184	7.80538	7.27716	7.63596	5.64886	6.57163	5.80106	6.29948	6.8222	7.31955	4.85481	7.49876	6.31308	5.35343
Nat9	4.09004	5.01273	3.64328	4.15809	4.20705	3.26832	2.11552	1.98893	1.53672	1.369	2.14286	1.57307	1.87847	2.1842	1.59802	1.76922	1.54358	1.57291	1.71525	0.993554	1.28954	1.60229	1.87228	0.806466
Lpl	1.4064	1.74617	1.34436	1.51573	2.01187	1.45149	0.0501686	0.090219	0.0472982	0.134819	0.098726	0.0894017	0.280844	0.279834	0.140657	0.382717	0.366817	0.255061	0.0393678	0.0240178	0.0367396	0.116531	0.076376	0.0231372
Atp6v0e	0.982347	1.20582	0.944334	1.28306	1.50909	0.964933	1.75896	1.65725	0.743502	2.1786	2.09502	1.33394	2.79429	2.5272	1.06416	2.49114	2.29109	2.13591	4.03618	3.05294	3.48363	3.10324	3.57532	2.85741
Nkx2-5	0	0	0	0	0	0	0	0	0	0	0	0	0	0	0	0	0	0	0	0	0	0	0	0
Zfp318	2.45755	2.39058	2.72696	2.35509	2.3286	2.33155	2.44475	2.44147	2.18011	3.00869	2.42121	2.51521	2.80626	2.46565	2.12037	2.86984	2.32841	2.64616	1.02731	1.17639	1.21051	1.37317	1.07561	1.11809
Ttbk1	0.105112	0.134235	0.114162	0.0982904	0.154101	0.157489	2.90733	2.65683	2.60854	2.45174	2.35097	1.82674	2.50911	2.23315	2.47959	1.86948	2.32454	2.3146	0.727406	0.627837	0.666899	0.671419	0.674173	0.521745
Srf	2.09036	1.77015	1.56446	2.47125	3.72673	2.23929	1.41028	1.53838	0.898559	1.9021	2.24518	1.60301	2.68723	3.77099	1.92487	2.28222	3.84216	3.02334	1.92743	1.6386	3.14423	1.73496	1.96183	2.29207
Gata3	0.014425	0.00252352	0.00295603	0	0.00729239	0	0	0	0.00227579	0	0.00384547	0.00228525	0.0148208	0	0.00195006	0.0143931	0.0208365	0	0.00805042	0.00280655	0	0.00244408	0.00297491	0
Gata5	0	0	0	0	0.00837437	0	0	0	0	0	0	0	0	0	0	0	0	0	0	0	0	0	0	0
Lama5	0.00720493	0.00840288	0.0157489	0.0057339	0.00809414	0.028787	0.0322977	0.0491459	0.0863892	0.0328141	0.0486581	0.0319598	0.0477056	0.0406498	0.138958	0.0407377	0.0693819	0.0434194	0.278788	0.250455	0.402089	0.382504	0.287273	0.252075
Steap1	0	0	0.00748857	0	0	0	0.240994	0.159254	0.167194	0.225872	0.204578	0.23736	0.0438034	0.0837584	0.0592815	0.0820405	0.121407	0.0594599	0.122366	0.0568791	0.048447	0.0990663	0.0527549	0.0479444
Steap2	0.0239701	0.00838667	0.0294722	0.0445109	0.0350069	0.0159619	1.8742	2.29208	2.12531	1.97284	2.38561	2.44806	1.37915	1.38055	1.14279	1.47489	1.63195	2.01944	0.477128	0.320237	0.496346	0.59837	0.454795	0.44028
Hspa8	8.878	12.224	10.0918	8.83172	12.47	7.80378	14.4244	15.288	7.70361	13.6337	14.4161	10.1845	14.3888	14.5203	7.87177	12.3757	12.7938	8.81836	11.4541	10.0997	8.2093	11.4322	10.7594	6.15509
Serac1	0.357699	0.349982	0.508566	0.317416	0.416069	0.445193	0.543584	0.515813	0.703165	0.492231	0.465812	0.525553	0.563736	0.457647	0.710359	0.549575	0.420663	0.531082	0.173128	0.199544	0.189447	0.240279	0.339469	0.19381
Awat1	0	0	0	0.0317711	0	0	0	0	0	0	0	0	0	0	0	0	0	0	0	0	0	0	0	0
Pdzd11	4.5475	5.21333	5.55169	5.69805	6.41309	5.8245	9.84227	10.2664	7.38816	10.1982	11.8821	9.64655	10.8688	9.84871	8.7374	8.84963	11.7398	10.7053	19.4392	16.5909	19.2043	18.798	18.5174	16.6717
Psma2	0.64104	0.669454	0.584552	0.736552	0.604142	0.65238	1.22651	1.13561	0.87179	1.27152	1.40972	1.20261	1.28389	1.33153	0.989342	1.11788	1.2136	1.09342	1.12873	0.938633	1.07754	1.06567	1.08817	0.887905
Mrpl32	1.59863	1.38581	1.27128	1.23426	1.38314	1.18212	2.38189	2.49556	1.59609	2.94958	3.74011	2.1924	3.2523	3.11304	1.78051	3.40447	2.85373	2.32939	2.15721	2.65538	2.20524	1.9405	2.65721	1.94087
Setdb1	4.94419	4.81798	6.01401	4.36444	4.8146	4.48385	2.38939	2.03008	1.59013	2.8196	2.256	1.68842	2.49218	2.19764	1.39688	2.36276	1.89631	1.90895	1.43775	1.60942	1.18168	1.61443	1.45852	1.14517
Anxa9	0.246706	0.105082	0.202223	0.136581	0.180752	0.145713	0.0776728	0.121943	0.101536	0.0348942	0.074346	0.0747688	0.110206	0.166422	0.145005	0.0856209	0.0371852	0.0698117	0.0119725	0.150259	0.0650074	0.130853	0.0973334	0.121965
Arnt2	0.0500341	0.0583532	0.0469566	0.0548228	0.0635408	0.0741693	0.940289	0.933189	0.760544	1.35404	1.02647	0.942453	1.80296	1.52958	1.10614	1.63879	1.59796	1.82015	1.25777	1.4176	1.68042	1.57361	1.47034	1.47081
Prune1	0.372419	0.488999	0.38759	0.336344	0.335646	0.361129	0.815968	0.685032	0.61	0.963779	0.843328	0.729208	0.90285	0.725964	0.441233	0.809995	0.747082	0.856373	0.597839	0.550357	0.817869	0.697648	0.659316	0.775921
Cers2	19.0388	21.5938	20.4726	19.3289	23.7199	22.7614	107.277	98.594	134.785	42.3061	74.869	69.2075	60.398	72.8826	183.488	21.5952	41.5692	48.1446	15.6782	17.8411	17.8885	15.3083	16.1176	10.9994
Nlrp5	0	0	0	0	0	0	0	0	0	0	0	0	0	0	0	0	0	0	0	0	0	0	0	0
Capza2	12.7942	12.5621	14.3856	9.75734	10.357	9.64595	1.46792	1.74653	1.75437	2.15841	2.4078	2.62901	1.67907	2.28779	1.07675	1.49302	1.56603	1.58818	2.08447	2.50956	2.0826	1.3338	1.80849	1.56918
Plekho1	13.7494	20.3849	13.4832	17.3751	18.6308	14.988	0.7063	0.761334	0.534872	1.07226	1.15484	1.34274	2.75222	3.44254	1.12882	2.72501	3.28289	1.90688	2.80306	3.5668	3.85254	4.9358	4.36343	2.48484
Vps45	0.31823	0.343247	0.343925	0.274227	0.318339	0.294788	0.462349	0.427072	0.266061	0.528832	0.478749	0.3057	0.741389	0.621826	0.278398	0.679547	0.556292	0.407494	0.425335	0.309181	0.299432	0.409371	0.290944	0.278343
Prpf3	1.05187	1.11377	1.09668	0.90687	1.2501	0.888469	0.940187	0.947572	0.736588	0.924509	0.959303	0.780578	0.913249	1.0379	0.55133	1.06336	0.829004	0.677266	0.756968	0.78989	0.653569	0.72227	0.61654	0.391417
Anp32e	6.07208	4.49194	5.12222	7.70464	4.5344	4.59567	7.3046	6.83607	5.18773	10.5053	7.08603	8.62957	8.94636	7.86241	4.00955	9.97358	5.88892	6.32374	6.73364	6.22428	5.13098	8.03962	4.62	5.17924
Aph1a	0.687935	0.654691	0.992459	0.985463	1.02015	0.945525	1.13864	1.04278	0.937729	1.27115	1.20305	0.802125	1.03665	1.02854	0.892792	0.658958	0.794961	0.676583	0.982856	1.52048	1.20909	1.36141	1.1123	1.15528
Tab2	10.6589	9.78702	11.2641	10.9567	9.02986	10.996	3.69246	3.93413	4.30784	4.47041	4.30857	4.70099	2.02158	2.08808	2.65695	1.97419	2.03384	2.59655	1.43993	2.16158	2.20028	2.23596	1.63218	2.01626
Ppil4	2.49531	1.63888	2.2451	1.76381	1.2979	1.38166	1.07928	1.11388	1.0217	1.36273	1.04129	1.06828	0.907078	0.947798	0.667225	1.22726	0.794671	0.869577	0.447388	0.455673	0.342351	0.423456	0.453835	0.326524
Cnih1	0.647722	0.848226	0.606782	0.729031	0.885668	0.650684	2.01494	1.66209	1.08029	1.6556	1.80565	1.43073	1.86972	2.01645	1.50108	1.91117	1.94073	1.63942	1.81776	1.7571	1.85062	1.49881	1.46558	1.20591
Eps8	0.341895	0.319305	0.404196	0.345571	0.268788	0.31277	0.591777	0.688124	0.39774	0.675175	0.571832	0.489277	0.624642	0.617661	0.310421	0.713656	0.468922	0.567067	0.501103	0.626402	0.452632	0.565455	0.551386	0.526104
Med22	9.92044	7.35661	6.22473	12.4538	7.47095	9.55841	3.26945	3.52649	2.03604	3.22725	3.67439	3.04588	5.56234	4.69	2.77715	3.65719	3.72827	3.80924	6.54088	4.78262	4.45604	5.9053	5.35923	3.82019
Abo	0	0	0	0	0	0	0	0	0	0.00344036	0	0.0033508	0	0	0	0.00527607	0	0	0	0	0	0	0	0
Surf1	4.34026	4.14637	3.86706	5.43647	5.36775	5.06669	7.04718	6.20716	6.33543	7.58768	8.04898	5.18985	8.89283	8.8634	7.08172	8.20944	9.52944	7.61478	10.6579	9.69277	10.3502	10.743	9.18456	7.65853
Med28	5.189	4.27454	3.55347	4.30728	4.4451	4.01002	4.5593	3.94272	2.66943	4.67526	4.53862	3.12172	5.57881	6.04049	2.51467	5.36103	5.13858	3.41998	5.43992	4.52903	4.23953	4.67417	4.29141	2.64273
Qdpr	1.56851	1.14374	0.925224	1.2541	1.07702	1.1011	3.51813	3.58301	2.53935	2.11256	3.41154	2.54525	2.94697	2.93603	3.00028	1.41878	2.05815	1.79154	2.78154	1.82532	1.89899	2.08633	1.87436	1.34627
Gnrh1	0.111647	0.214846	0.183032	0.310981	0.112883	0.267648	0.0577477	0.126926	0.0880707	0.0726403	0.0744077	0	0.0955913	0.0984223	0.0905582	0.0835498	0.0483809	0	0.0311543	0	0.148015	0.0189167	0.0230252	0.0732396
Tnr	0.0297148	0.026909	0.0484754	0.0419635	0.0536078	0.0693723	13.1572	13.5325	12.7101	17.3721	12.1554	18.6426	5.46568	5.45702	4.73883	5.92111	5.27353	8.86637	0.243875	0.348695	0.211427	0.307017	0.2694	0.230856
Sqstm1	6.83367	4.94883	6.12852	7.04768	6.11601	6.28108	7.42862	7.45846	4.8164	7.12467	8.04441	6.84062	10.0221	8.05913	5.41672	8.6603	8.95731	7.484	9.79199	7.92493	8.50783	9.15037	8.63988	6.93856
Nfe2l2	10.4698	12.6055	9.08703	7.68272	12.6897	8.30436	1.30635	1.39158	1.71229	0.483152	1.03985	0.954077	0.62323	0.912174	1.80478	0.35012	0.662452	0.684547	3.1925	5.20762	5.00746	3.83545	4.63145	4.4003
Rxrg	0.00864578	0.0100833	0.0023623	0.00458704	0.017483	0.0161205	0.0864571	0.0283949	0.0145495	0.0806276	0.104485	0.0237412	0.179634	0.213408	0.0716856	0.163907	0.203147	0.156307	0.0546845	0.0201856	0.0414819	0.0429699	0.0713218	0.0226864
Rxra	0.789873	0.793037	0.780324	0.950012	1.04631	0.945125	0.142105	0.133264	0.111829	0.20914	0.199215	0.126222	0.302976	0.316793	0.218388	0.263166	0.37304	0.272192	0.551981	0.509945	0.771133	0.665663	0.650458	0.654825
Adamtsl4	0.142017	0.198756	0.157986	0.201823	0.177777	0.0891664	0.162653	0.34597	0.416103	0.1254	0.589523	0.327837	0.0972754	0.121618	0.652754	0.080973	0.164111	0.176059	0.407611	0.0631564	0.20749	0.302499	0.158995	0.310541
Fcrls	179.444	199.16	156.981	171.91	222.763	146.121	0.880884	0.832745	1.60634	1.45358	1.96248	2.43112	0.878026	0.53596	0.292119	0.813102	0.624261	2.00629	0.725616	0.548684	0.298268	0.570904	0.513622	0.272292
Cd5l	0.108109	0.094563	0.103386	0.164903	0.0910885	0.100787	0.0419385	0.0614522	0.034112	0.0351693	0.0336234	0.0342537	0.0185125	0.0381215	0.0146148	0.00898916	0	0.01303	0	0	0	0.0183173	0	0.00787988
Prpsap1	2.41186	2.6028	2.8487	1.83034	3.0182	2.11027	2.91347	3.01961	1.55416	2.9365	2.90825	1.9024	4.1649	4.23083	2.2342	3.58441	3.51619	2.48746	3.15209	3.33428	2.65592	3.07608	3.04739	1.98939
Fam184b	0.0108133	0.00454003	0.0115227	0.0103266	0.0153063	0.0164175	0.0525745	0.0336013	0.03139	0.075279	0.061112	0.0438545	0.101471	0.085411	0.0391763	0.108973	0.101839	0.0789794	0.0675893	0.090886	0.0794605	0.129715	0.0776059	0.0491813
Ncapg	0.128056	0.0624546	0.0667971	0.219263	0.0627754	0.111631	0.0762711	0.0794081	0.0538747	0.141386	0.0558616	0.0491805	0.324272	0.240828	0.111212	0.32524	0.125557	0.151536	0.138602	0.184218	0.138168	0.205135	0.105638	0.0950351
Lcorl	0.420027	0.380487	0.486991	0.42388	0.282121	0.420291	0.793915	0.920213	1.05746	1.34134	1.11617	1.69417	0.331338	0.362048	0.433424	0.478231	0.469108	0.592495	0.0570526	0.0634166	0.0482631	0.0833416	0.0452214	0.052483
Lta4h	1.15584	1.43525	1.21371	1.26555	1.38506	1.55145	0.576353	0.543933	0.612613	0.690583	0.636395	0.615158	0.540738	0.708593	0.569866	0.716093	0.665648	0.551776	1.10883	1.12882	1.31917	1.42847	0.900519	0.799524
Amdhd1	0.0142375	0.00996287	0	0	0.0191936	0	0.00368209	0	0.00449242	0.00463166	0	0.00451109	0.00487604	0.0100409	0	0.00710302	0.00822626	0.015444	0	0	0	0.00482462	0.00587249	0
Dstn	2.36813	2.87472	1.86113	2.67495	2.7691	2.06531	5.79734	5.93769	5.59749	6.56621	7.28827	7.03534	5.37491	6.29431	6.23292	5.01374	5.79432	5.57342	4.62331	4.51497	4.23427	4.43809	3.98761	3.5524
Macroh2a1	0.94522	0.914601	1.11638	0.949715	0.981863	1.12011	0.630969	0.635991	0.442293	0.923096	0.769574	0.686602	0.982181	0.891039	0.487563	1.1964	0.803335	0.873953	1.19035	1.08204	1.17384	1.20676	0.929753	0.735622
Gtf2ird2	0.733664	0.694829	0.818747	0.640148	0.673271	0.944146	0.173737	0.180883	0.146893	0.237713	0.227787	0.141902	0.282546	0.28468	0.211905	0.205795	0.217909	0.249298	0.243367	0.222426	0.207588	0.22565	0.274659	0.201017
Bola1	0.20047	0.190638	0.0926956	0.249537	0.16631	0.139656	0.225992	0.198687	0.139485	0.364538	0.304208	0.14658	0.436585	0.623521	0.219585	0.456471	0.558354	0.356854	0.929462	0.708065	0.697042	0.832609	0.754783	0.364174
Castor2	0.442031	0.631676	0.56314	0.483169	0.568978	0.508557	1.39385	1.33603	0.880546	1.65109	1.50918	0.924702	3.1937	2.48828	1.67174	2.6171	2.65554	2.62467	1.64659	1.55425	1.83774	1.73792	1.63871	1.5861
Fcgr1	19.525	26.7091	25.5262	20.2677	25.8943	27.0914	0.127836	0.0488654	0.21022	0.146821	0.183336	0.367711	0.0588829	0.068205	0.0697282	0.0964977	0.0745049	0.303065	0.0959529	0.041814	0.00814062	0.0728274	0.0620514	0.0845897
Ncf1	56.1212	49.8104	51.8237	56.4313	53.3364	56.4146	0.288995	0.423463	0.564153	0.420072	0.417053	0.889085	0.340182	0.192641	0.147707	0.322107	0.208043	0.619544	0.277173	0.212582	0.112873	0.126223	0.143395	0.0651597
Wnt11	0	0.00414107	0.00970163	0	0.00797782	0.00945778	0.00306092	0	0	0.0038503	0	0	0	0.008347	0	0	0.00341925	0	0.00660533	0	0	0.0200536	0	0
Adss	1.2753	1.15517	1.47512	1.13897	1.02438	0.970962	0.668796	0.800097	0.552185	0.898894	0.753611	0.787943	0.924484	1.09427	0.55169	0.975572	0.712293	0.732676	0.77895	0.884977	0.68971	0.636233	0.660447	0.53604
1700016C15Rik	0	0	0	0	0	0	0	0	0	0.00328905	0.00269526	0	0	0	0	0	0	0	0	0	0	0.00342608	0	0
Il17rb	0.0558801	0.0456199	0.145048	0.096354	0.094165	0.0893067	0.101161	0.127056	0.135179	0.157548	0.0844147	0.0472142	0.0956887	0.170772	0.146048	0.16727	0.13991	0.127966	0.176721	0.181201	0.317498	0.214607	0.230487	0.252527
Cacna1d	0.400093	0.349225	0.474671	0.381459	0.385895	0.530679	0.0905376	0.0740127	0.0362118	0.147967	0.0944486	0.0622162	0.164248	0.158716	0.0795648	0.191725	0.15756	0.15761	0.039369	0.0538752	0.0518457	0.0654701	0.0590615	0.0462757
Chdh	0.0679044	0.0527965	0.0834913	0.0720537	0.0355996	0.0633055	0.0663428	0.0600426	0.157125	0.0343626	0.0382157	0.0430303	0.0620154	0.021284	0.175434	0.030113	0.0893669	0.0627463	0.0968468	0.0675256	0.160042	0.14829	0.112033	0.138584
Actr8	1.54832	1.44857	2.02021	1.30985	1.49542	1.59318	1.83208	1.56893	1.21535	1.60077	1.61258	1.59673	1.49347	1.51376	1.32583	1.40523	1.21813	1.30068	1.089	1.28751	1.0862	1.09535	0.990316	0.831107
Lrrc27	0.0396278	0.044368	0.0779585	0.072535	0.0934889	0.075999	0.188572	0.135154	0.147546	0.0979751	0.219733	0.238561	0.119431	0.106199	0.188571	0.0751264	0.132799	0.151883	0.216735	0.366997	0.558386	0.378685	0.454394	0.329278
Stk32c	0.00650217	0.00303331	0.0017766	0	0.00511325	0.00259792	0.0375553	0.0262828	0.0321426	0.0458303	0.0491121	0.0686726	0.02598	0.0236923	0.00937601	0.0346016	0.047587	0.0219432	0.00725756	0.00590365	0.00492584	0.00440674	0.00536385	0.00379146
Fnta	5.406	3.90573	4.3507	3.81057	3.69124	3.7252	21.9918	22.5933	14.9665	16.3942	21.5611	21.2617	9.43031	8.2737	8.02567	5.28196	7.01777	8.05744	4.38839	4.55687	3.52099	4.13013	3.892	2.92302
Mtrex	1.49996	1.37129	1.66804	1.38137	1.19002	1.41553	1.50453	1.61439	1.47926	1.66434	1.67024	1.67375	1.21878	1.42396	1.01574	1.37407	1.14371	1.09618	0.563971	0.652289	0.588427	0.730537	0.627673	0.601386
Lbp	0.0360705	0.0378611	0.0258709	0.107647	0.0334308	0.0324266	0.00466425	0	0.00569073	0.00586711	0.00721184	0.00571437	0.0123534	0.0286182	0.00243811	0.0224942	0.0104205	0.00652119	0.201305	0.308788	0.273259	0.479756	0.371946	0.114367
Celsr1	0	0.00555059	0.0021673	0.00701401	0.000594071	0.00140855	0.0779529	0.0454224	0.0300342	0.02007	0.0413516	0.0173135	0.0289768	0.0441309	0.0266886	0.00791458	0.0351369	0.0140218	0.59516	0.428689	0.684372	0.683332	0.440592	0.452506
Fli1	1.52873	1.66665	1.91678	1.70497	1.81787	1.58681	0.0142655	0.0164239	0.026729	0.0205079	0.0204817	0.0362029	0.0337343	0.0243133	0.00692425	0.0471757	0.0210576	0.0256434	0.00769606	0.00843231	0.00671588	0.0146866	0.00893818	0.00947699
Stard13	0.0030268	0.00423607	0.00347347	0.00337234	0.00612063	0.00677233	0.356011	0.400537	0.301798	0.418283	0.41087	0.31878	0.194054	0.210901	0.188223	0.237984	0.206364	0.246466	0.0912177	0.132855	0.16051	0.158365	0.141325	0.106426
Tenm1	0.000923079	0.00175325	0.00302657	0.00167912	0.00382209	0.003372	0.0220991	0.0220876	0.00981971	0.0399815	0.0273497	0.0181333	0.0692786	0.0722603	0.0318029	0.069341	0.0808396	0.06189	0.00515159	0.00584967	0.00169829	0.00455796	0.00859381	0.0040369
Camk1g	0.0297715	0.0243051	0.016269	0.00789767	0.0167229	0.0198251	0.0641621	0.0940165	0.0344443	0.0871656	0.230161	0.0848964	0.455425	0.545898	0.203917	0.460438	0.670861	0.305002	0.0830754	0.027031	0.0676618	0.0773457	0.0613986	0.0911397
Utp25	0.931532	0.796234	1.22619	0.755829	0.965369	1.1396	0.641908	0.572629	0.436587	0.904185	0.569462	0.613376	0.617276	0.624857	0.456137	0.61763	0.571538	0.61879	0.426739	0.443949	0.604557	0.536734	0.42052	0.400752
Hsd11b1	0.00840091	0.0117573	0.0183632	0.0222856	0.00755018	0.0089508	0.010139	0.0127342	0.00353436	0.00546587	0.00597211	0.0106471	0.0613788	0.0296234	0.0242279	0.100588	0.084135	0.0465766	3.20064	4.06007	3.81856	2.96825	3.64528	3.5907
Syt14	0.00986684	0.00978128	0.0080878	0.00785232	0.00886765	0.00262817	0.12376	0.127128	0.121938	0.146582	0.126694	0.157876	0.153189	0.197738	0.106264	0.159161	0.152025	0.160544	0.0403814	0.0505521	0.069142	0.054054	0.0691855	0.0704794
H2-M3	7.55341	6.31929	7.35668	7.36431	7.38343	10.3567	0.273916	0.105623	0.0879467	0.398959	0.356655	0.423898	0.992751	0.589703	0.256221	0.75089	0.418712	0.725623	0.248883	0.0867659	0.274498	0.13223	0.298906	0.487577
Lonrf3	0.395133	0.28384	0.455737	0.481428	0.348834	0.472225	0.0271298	0.0291523	0.0154468	0.0409515	0.0372871	0.046533	0.10299	0.113439	0.037817	0.0872256	0.0828356	0.0632179	0.425426	0.397314	0.426494	0.469234	0.389419	0.495473
Atp5e	10.5407	11.7358	6.45605	13.347	12.2026	8.67351	17.2074	16.1262	7.76469	19.7329	23.9632	12.7135	29.2555	36.2292	10.1707	25.7266	29.7496	16.9738	55.1526	43.3644	25.9449	45.3061	38.8545	20.5641
Nelfcd	2.03193	1.93374	2.01533	2.32858	2.30097	2.08646	2.41202	1.71711	1.33999	2.55152	2.28047	1.69965	2.74182	2.96632	1.84591	3.37569	2.30109	2.29963	3.58343	2.9571	3.51736	3.71131	3.23508	2.48815
Tubb1	0	0	0	0	0	0	0	0	0	0	0	0	0	0	0	0	0	0	0	0	0	0	0	0
Ctsz	30.9317	29.8778	35.6483	34.4219	44.9808	41.2667	0.9264	0.943973	0.844459	0.904119	1.23482	1.31761	1.12809	1.02357	0.829348	0.811382	1.0408	1.10168	4.58421	3.67695	3.99256	4.17176	3.94848	2.67396
Prelid3b	4.76043	3.55947	4.01151	4.13076	3.85852	3.40111	7.53256	6.96864	5.25961	7.3524	7.17943	6.54075	6.02365	4.96791	3.7129	4.95707	4.09579	3.65705	8.8889	9.31388	5.12305	7.50795	7.59716	4.76044
Sertad4	0.0316421	0.081187	0.129684	0.0503634	0.0142189	0.109568	0.414617	0.455653	0.206339	0.597029	0.691691	0.394342	1.09812	1.30173	0.342205	1.07345	0.938496	0.961057	0.400272	0.541756	0.415498	0.450343	0.556855	0.249085
H2-M2	0.176006	0.0615809	0.0721354	0.0700352	0.177955	0.175806	0	0	0	0	0	0	0	0	0	0	0	0	0	0	0	0	0	0
Ube2a	2.42946	2.86832	1.86872	2.84059	2.73188	2.22658	2.16779	2.19909	1.4169	2.48712	2.55378	2.39319	2.33444	3.28867	2.44064	3.05596	2.84068	2.53958	3.1101	3.7187	2.79997	3.31646	3.40039	2.53786
Slc25a5	37.5824	41.6616	43.6471	46.7218	49.1926	47.9365	29.1001	26.4575	19.2018	29.8914	35.2567	26.9655	34.7444	36.0124	24.0082	34.0049	33.2029	31.4809	73.0947	67.9333	56.6287	68.0159	61.8816	45.0258
Atp1b4	0.011547	0.0282806	0.0804528	0.0137842	0.0233498	0.101498	0	0	0.0109304	0	0	0	0	0	0.00312199	0	0	0	0	0	0	0	0	0.00504986
Ppdpf	1.79363	2.40109	1.78985	2.6066	3.15391	2.49266	15.8118	13.2394	11.3683	15.526	18.3361	13.0463	17.1999	20.0191	15.3918	13.4614	20.6817	12.5761	19.2367	17.6003	16.8373	20.3482	16.0186	9.82218
Kcnq2	0.0875622	0.118368	0.115818	0.0712683	0.11536	0.117677	0.692737	0.515828	0.203449	1.08373	0.792588	0.397238	2.24366	1.85117	0.898549	2.25768	2.38934	2.104	0.168814	0.218373	0.101009	0.196914	0.28729	0.189727
Eef1a2	0.190441	0.142147	0.0520344	0.141454	0.23106	0.162325	0.604152	0.72168	0.248374	1.23906	1.21167	0.466631	3.20022	3.88594	0.665935	3.58504	4.4087	1.59754	0.581012	0.444628	0.230835	0.438832	0.764557	0.433085
Col20a1	0.0373406	0.0444202	0.0306079	0.0326884	0.0302033	0.0268547	1.61658	1.48012	1.85924	1.29977	1.31995	1.38188	0.787763	0.866394	1.82533	0.342774	0.707658	1.04503	0.0458465	0.0377781	0.0424321	0.0455526	0.0523659	0.0424585
Pls3	0.155317	0.149557	0.183895	0.128888	0.141378	0.166544	0.260919	0.263602	0.278129	0.351527	0.304343	0.329758	0.615579	0.70028	0.381169	0.683472	0.536139	0.463675	0.472667	0.518622	0.450538	0.463338	0.452272	0.442381
Mpped2	0.00610913	0.000949985	0.00500762	0.00540203	0.0105234	0.00596659	0.138332	0.145078	0.0822459	0.273817	0.213165	0.202168	0.214339	0.232176	0.0895608	0.20996	0.191392	0.187515	0.0621274	0.0607506	0.0786774	0.0671659	0.0515161	0.0564027
Nkap	1.73178	1.49309	1.62697	1.60724	1.27434	1.2411	1.57845	1.48552	2.23898	1.30431	1.26991	1.61624	1.00266	0.871374	1.46773	0.712966	0.82571	1.11241	0.35447	0.447962	0.281936	0.531353	0.282445	0.364574
Ndufa1	2.75926	2.93113	1.71675	3.54519	2.80102	1.80643	3.8517	2.82194	2.01401	5.58042	4.62613	2.97037	8.17471	7.76034	2.04933	7.66242	6.37706	4.68796	9.68473	6.80434	5.23842	7.8632	6.58179	3.54743
Wt1	0.002524	0.0035324	0	0.00200868	0	0.00201691	0.00391652	0	0	0	0	0.00319887	0.00345767	0	0	0.00251842	0.00145834	0	0	0	0	0.0017106	0	0
E2f3	0.632455	0.428966	0.542932	0.586619	0.478713	0.616504	0.549082	0.563197	0.541598	0.576868	0.534903	0.477525	0.328744	0.412291	0.346847	0.335669	0.445766	0.392492	0.193588	0.201303	0.305826	0.205705	0.197346	0.21055
Cr1l	2.25506	2.46548	2.85102	2.12924	2.27652	2.59333	0.560736	0.708404	0.559152	0.714387	0.728064	0.678174	0.70924	0.80621	0.501668	0.717667	0.730774	0.726184	0.837722	0.738231	0.784426	0.861895	0.920104	0.850964
Ppfibp1	0.104326	0.128625	0.147956	0.119268	0.145107	0.132989	1.98887	2.12609	1.58166	2.83093	2.24789	2.43717	1.2874	1.35881	0.668907	1.43173	1.01756	1.25861	0.0914937	0.101167	0.0577077	0.0510651	0.0792319	0.0492462
Cd46	0.0900638	0.0510187	0.110737	0.0853279	0.0390262	0.13023	0.0354928	0.0406308	0.0608961	0.058598	0.0274394	0.0529959	0.0337825	0.0302461	0.0475418	0.0213964	0.0421257	0.0480726	0.0359025	0.0417212	0.0194941	0.0261597	0.0371482	0.0337608
Cd34	1.59804	1.55518	2.12534	1.57918	1.96171	2.40174	0.0492656	0.0721886	0.0434111	0.055085	0.053604	0.090536	0.126856	0.108222	0.0543658	0.153115	0.155926	0.103319	0.124032	0.0700077	0.0320696	0.100415	0.0698424	0.0786809
Plgrkt	6.86864	5.87745	7.95277	5.32533	5.49523	7.62148	1.97264	1.82154	1.5167	2.64185	2.52572	2.30455	3.43107	4.09916	2.01441	4.05149	3.45335	3.64073	2.41435	2.70227	2.09384	2.40043	1.86785	1.96385
Cd274	0.333971	0.483518	0.807104	0.554481	0.477395	0.717799	0.0923278	0.078554	0.134449	0.0487031	0.0614008	0.0875728	0.0157763	0.0487305	0.102751	0.0459632	0.0998091	0.0374765	0.122114	0.120993	0.248644	0.0624396	0.171002	0.156129
Pdcd1lg2	0.00591851	0.00138052	0.00323425	0.00471013	0.0106383	0	0	0	0	0	0	0	0.00135131	0	0	0	0	0	0	0	0	0	0	0
Gtf3a	0.683327	0.800928	0.630135	0.46224	0.875134	0.737156	0.768737	0.763899	0.485129	0.889183	0.792412	0.801082	0.912697	0.734915	0.452643	1.00568	0.88834	0.815357	1.20127	0.664744	0.802384	0.97254	0.887825	0.522969
Mtif3	0.797049	0.850219	0.613499	0.456397	0.838635	0.660217	0.749112	0.567253	0.325104	0.594472	0.678899	0.52356	1.00534	0.904863	0.593937	0.814684	0.83119	0.688861	0.802851	0.68838	0.795274	0.750991	0.769769	0.527111
Lnx2	0.186409	0.202601	0.195062	0.265136	0.264665	0.193329	0.0830834	0.0841671	0.0525611	0.116122	0.132164	0.113099	0.131757	0.177616	0.0750635	0.124658	0.15812	0.136238	0.0863249	0.0679059	0.189292	0.118272	0.129236	0.100602
Il19	0	0	0	0	0	0	0	0	0	0	0	0	0.0109137	0	0	0	0	0	0.0177845	0.0124001	0.0120707	0.0107986	0	0
Dyrk3	0.0109185	0.00764033	0.0178997	0	0.0441576	0.00872488	0.050827	0.0496511	0.00689031	0.0142077	0.0640351	0.0345947	0.17201	0.107802	0.0531369	0.261464	0.17664	0.0947498	0.292487	0.254917	0.215059	0.170196	0.189147	0.238749
Mapkapk2	1.69682	2.09392	1.52555	2.20348	1.99883	1.71965	0.828902	0.740999	0.690078	1.00411	0.877406	0.848261	0.975922	0.953538	0.852008	0.913722	1.00219	1.10632	1.52117	1.09836	1.39972	1.56618	1.26201	1.09073
Il10	0	0.048644	0.0189937	0	0	0.0185163	0	0	0	0	0	0	0.0158716	0	0	0.0231205	0	0.0167569	0	0	0	0	0	0
Lamp2	8.28097	10.9177	9.83966	8.75837	10.518	10.4042	3.23445	3.45444	4.25119	3.02723	3.64343	4.46022	2.36843	3.0927	3.97865	2.7162	2.6447	3.46143	3.32739	4.73064	4.77491	3.65186	3.93432	4.55638
Atxn10	0.612178	0.644533	0.543999	0.631707	0.684576	0.626817	1.15327	1.07054	0.699403	1.29417	1.3445	1.14007	1.47594	1.51107	0.877689	1.45421	1.39861	1.31389	1.50033	1.15099	1.35655	1.39123	1.22082	1.12084
Foxred2	1.01974	0.959991	0.835878	1.07427	0.954388	0.937978	0.880346	0.706146	0.398153	1.42241	0.954396	0.590413	2.39694	2.18337	0.924322	2.7377	2.03887	2.57838	2.75955	2.12961	3.67366	3.01306	2.37236	2.61804
Eif3d	2.87689	2.57625	2.28396	2.98597	3.29523	2.07383	4.95838	3.91864	2.48205	5.00669	4.44605	3.85646	5.64982	5.76748	2.99709	5.32955	4.24275	4.04452	5.53524	3.89854	4.15313	4.9494	3.75901	2.70986
H3f3b	28.7788	23.7261	21.416	35.019	18.1537	21.4115	14.5705	12.5808	11.3927	21.8045	14.0452	14.3405	17.5728	14.9623	10.7818	24.4814	13.6429	17.0756	14.5372	11.0074	11.8013	18.213	10.3389	9.8625
Nup50	2.05455	1.97789	1.60438	1.87694	1.86425	1.57863	2.42092	2.56608	1.58809	2.29778	2.5052	1.91055	2.73128	2.51638	1.58102	2.10459	2.2056	1.72314	2.38144	2.01523	1.63474	1.89915	2.091	1.52057
Phf21b	0.0184995	0.0282442	0.0289494	0.0107073	0.0260728	0.0161267	0.195722	0.149131	0.156013	0.218842	0.221477	0.152399	0.276467	0.264491	0.267366	0.281914	0.255559	0.287022	0.437377	0.35862	0.494335	0.384111	0.370423	0.233886
Nlrp14	0	0	0	0	0	0	0	0	0	0	0	0	0	0	0	0	0	0	0	0	0	0	0	0
Ift27	0.25159	0.369143	0.232837	0.335857	0.339168	0.207529	0.604482	0.584345	0.368757	0.5914	0.683677	0.560576	1.26745	1.23057	0.64073	1.00413	1.04569	0.856878	4.05827	2.54538	1.7953	2.51366	2.67799	1.4907
Pacsin2	3.10076	2.58188	2.71572	2.87364	2.90737	2.45432	0.585031	0.616365	0.481191	0.810625	0.76182	0.908838	0.512221	0.520798	0.394266	0.485005	0.489173	0.574589	0.317481	0.362699	0.371273	0.41179	0.318362	0.388946
Cmah	0.174341	0.128652	0.140958	0.116042	0.134074	0.0892881	0.00040989	0.00060061	0.000500097	0	0.00169005	0	0.00488521	0	0.000857036	0.00474425	0.00366299	0.00458461	0	0	0	0	0.00130745	0
Ttll12	0.882459	0.804007	0.703929	1.08407	1.22158	0.932334	1.53168	1.40048	0.784881	2.41992	2.42512	1.33233	2.70581	2.91543	1.16894	2.90745	3.16874	2.66828	2.90205	1.82063	2.05044	2.74551	2.57965	1.61623
Bik	0.0200621	0	0.0164448	0.010644	0.00901522	0	0	0	0	0	0	0	0	0	0	0.00667258	0	0	0	0	0.00506613	0	0	0.00584917
Scube1	0.00693151	0.0235591	0.0121751	0.0126087	0.0226935	0.00949529	0.0189505	0.0255167	0.00749872	0.0373672	0.0295652	0.0269821	0.0881732	0.081706	0.0273081	0.0839823	0.136168	0.075189	0.124894	0.0886224	0.0802667	0.15234	0.115177	0.0614933
Tox4	3.80891	3.56181	3.99725	3.51361	3.98805	3.86376	2.69688	2.68843	2.39064	2.81877	2.6257	2.52715	2.59479	2.69106	2.41347	2.44661	2.63452	2.32111	1.73747	1.65098	1.81062	1.72251	1.61366	1.45189
Mrps18c	0.650775	0.469618	0.283388	0.695936	0.438654	0.260014	1.18864	0.909384	0.372181	0.754202	0.759	0.605697	1.29547	1.1187	0.549847	0.750795	0.740268	0.985349	0.930672	0.917961	0.354348	0.826972	0.587174	0.373542
Sulf1	0.00140719	0.00295409	0.00403713	0.00223977	0.00758813	0.00562237	0.107722	0.0975862	0.0257529	0.159765	0.120043	0.0561785	0.340244	0.324022	0.132782	0.357338	0.327255	0.260003	0.0541881	0.0465433	0.0927457	0.0848793	0.0829998	0.0578482
Srsf6	45.0062	39.2852	56.7653	35.479	32.9718	40.9563	33.4235	38.5715	29.8904	39.0706	36.4129	42.4567	25.1654	26.8398	18.5571	21.7749	18.7602	20.407	12.6891	16.8018	12.2827	14.243	12.3757	9.77623
Plcg1	2.58492	2.08941	3.13555	2.59113	2.34778	2.9008	1.16834	1.11024	0.976733	1.36529	1.0903	1.13663	1.50507	1.1726	1.00316	1.28827	1.25877	1.1792	1.6828	1.52074	1.98053	2.03995	1.68915	1.4239
Kctd2	5.09682	3.70833	5.58502	3.94589	4.27642	4.95045	4.65483	4.55791	3.51252	3.50345	4.40023	3.29062	4.59394	4.30136	3.77086	2.84068	2.84015	2.67569	3.18962	3.3442	2.25371	2.76054	2.67401	1.71605
Tmprss6	0	0	0	0	0.00276554	0	0.00424431	0.00932875	0.0129459	0.0133472	0.0131251	0.00779983	0.00281029	0	0.022186	0	0.00711175	0.0207692	0.0137385	0.0223512	0	0.0139033	0.00338458	0.0179431
Kctd5	0.424604	0.442453	0.431275	0.393007	0.413752	0.486819	1.64238	1.28374	0.876676	1.46237	1.41737	1.29854	1.71972	1.59489	1.03071	1.39073	1.21599	1.35172	5.76447	4.66575	4.06629	5.87424	4.79337	3.39898
Pom121l2	0	0	0.0129203	0	0	0	0	0	0	0.0205108	0	0	0.0107965	0.0111162	0.00852336	0.0314549	0	0	0	0	0	0	0	0
Etaa1	0.558118	0.500563	0.650791	0.631843	0.540455	0.540211	0.166702	0.160859	0.183546	0.209693	0.238894	0.219178	0.290753	0.360346	0.255041	0.211773	0.213468	0.358132	0.175481	0.0978821	0.154833	0.250395	0.233447	0.171889
Matn4	0.0150755	0.00527463	0.0247146	0.0119975	0.0101616	0.00602336	1.86363	1.91953	0.689741	2.66792	2.01346	1.12728	4.52282	5.05546	2.06245	4.2795	4.15052	3.65762	0.0420672	0.140789	0.15418	0.112389	0.180326	0.0988946
Svs4	0	0	0	0	0	0	0	0	0	0	0	0	0	0	0	0	0	0	0	0	0	0	0	0
Svs6	0	0	0	0	0	0	0	0	0	0	0	0	0	0	0	0	0	0	0	0	0	0	0	0
Slpi	0.00339323	0.0142467	0.0278141	0.0216034	0.00457441	0.0135575	0.112327	0.0951545	0.0192722	0.119217	0.104931	0.0602071	0.313769	0.358957	0.0880735	0.260701	0.20978	0.284646	0.0113623	0.00792227	0.0077118	0.0114985	0.0167951	0.00296792
Svs3a	0	0	0	0	0	0	0	0	0	0	0	0	0	0	0	0	0	0	0	0	0	0	0	0
Svs5	0	0	0	0	0	0	0	0	0	0	0	0	0	0	0	0	0	0	0	0	0	0	0	0
Rbpjl	0	0	0	0.00768526	0	0	0.5894	0.666032	0.201108	1.03042	0.864989	0.458962	1.32953	1.47106	0.866838	1.71513	1.25542	1.98332	0.0215576	0.0375772	0.065842	0.104717	0.079663	0.0253396
Sdc4	3.38268	3.16315	3.09022	4.12233	3.08364	3.55413	0.0970288	0.151349	0.122201	0.188983	0.112922	0.126544	0.472517	0.499314	0.268321	0.899652	1.20974	0.704547	38.4321	30.5075	36.9814	38.1204	34.9834	33.8424
Ccdc70	0	0	0	0	0	0	0	0	0	0	0	0	0	0	0	0	0	0	0	0	0	0	0	0
Il13ra1	1.38641	1.586	1.78206	1.28404	1.56971	1.20742	0.0124714	0.0137057	0.01268	0.0156876	0.0117842	0.0216456	0.0192679	0.0240897	0.00760559	0.0200485	0.0150923	0.0276078	0.0381263	0.0453479	0.051754	0.0953236	0.0679588	0.0492086
Prl5a1	0	0	0	0	0	0	0	0	0	0	0	0	0	0	0	0	0	0	0	0	0	0	0	0
Nbr1	6.12543	5.68721	6.3318	5.29055	5.64222	5.4429	8.01564	8.57169	7.84689	9.58721	9.16826	9.60045	6.42187	6.04113	6.15663	5.94477	5.4217	5.96967	3.77907	4.40086	3.95162	4.73791	4.41156	3.79502
Cyth1	0.222254	0.236141	0.267421	0.247464	0.276943	0.264773	0.584809	0.470571	0.630514	0.306455	0.468014	0.470974	0.280027	0.268907	0.688568	0.129192	0.245639	0.269842	0.188901	0.158686	0.189998	0.243217	0.173252	0.178346
Rnd3	0.0509175	0.0757139	0.0782565	0.0810432	0.0471912	0.0762895	0.200815	0.207425	0.044182	0.43895	0.264688	0.189562	0.47083	0.426421	0.137666	0.590607	0.456002	0.276161	1.51317	2.30823	1.84188	2.05325	1.51737	1.86492
Brca1	0.07335	0.0539597	0.0570413	0.196077	0.0595834	0.0556076	0.54477	0.538818	0.306218	0.63509	0.72199	0.734164	0.337521	0.334252	0.17696	0.35468	0.306445	0.356346	0.191033	0.172716	0.132507	0.274052	0.107054	0.128313
Gast	0	0	0	0	0	0	0	0	0	0.029867	0	0	0	0	0	0	0.0265232	0	0	0	0	0.0311113	0	0
Cntnap1	0.147081	0.139974	0.197722	0.103006	0.241902	0.197453	0.185625	0.115933	0.0779675	0.21053	0.297992	0.126757	0.959088	1.23644	0.324496	1.41473	2.38289	0.935999	0.288937	0.489911	0.19165	0.354868	0.538715	0.324189
Nt5c3b	0.274447	0.290205	0.194968	0.300925	0.27132	0.1657	0.914816	0.979934	0.446457	1.09915	0.952744	0.680198	1.59578	1.66454	0.557345	1.69172	1.51172	1.00999	1.98094	1.39543	1.53855	2.27749	1.60996	1.15756
Coa3	11.9263	10.0872	5.01546	14.2782	13.3515	7.62414	19.3644	17.6849	8.63886	14.7769	19.4631	10.712	30.1897	34.5944	12.1691	24.938	29.0014	16.9492	31.8325	21.065	17.9913	30.5039	23.9542	12.2456
Zpbp2	0.015704	0	0	0	0	0	0.00812268	0	0	0	0	0.0199029	0	0	0.0169837	0	0	0.022713	0.0350568	0.0977722	0.0118968	0.0319294	0.0259094	0.0274713
Gsdma	0	0	0	0	0	0	0.00460227	0	0	0	0	0	0	0	0	0	0	0	0	0	0	0.0120607	0	0
Med24	1.27726	1.54654	1.27048	1.67891	1.65416	1.44497	1.6875	1.49739	1.04755	2.01998	1.88995	1.50055	2.64755	2.40545	1.52879	2.82095	2.69766	2.3109	2.6484	2.12207	3.03693	2.33757	1.89027	1.91216
Gsdma2	0	0	0	0	0	0	0	0	0	0	0	0	0	0	0	0	0	0	0	0	0	0	0	0
Psmd3	2.08924	2.19915	2.08262	2.76878	2.7449	2.09394	4.51027	3.90494	2.73188	4.76913	4.88517	3.15275	4.88737	4.75116	3.98761	4.08975	5.17125	4.13565	4.18962	3.46545	3.72213	4.33185	3.57842	2.77978
Exosc10	3.28205	3.34436	3.45022	3.67724	3.67596	3.40311	2.93874	2.81438	2.03052	4.03853	3.29622	2.73327	3.20569	3.10133	2.33773	3.5716	2.81584	2.58498	2.34631	2.78959	2.60281	2.46628	2.11035	1.91667
Glod4	0.476406	0.38961	0.350028	0.454657	0.41315	0.343551	1.21705	1.04652	1.27896	0.687336	0.913793	0.895862	0.8662	0.728642	1.30639	0.53139	0.632205	0.634417	0.467985	0.435567	0.336703	0.446908	0.318715	0.32353
Vps53	0.364326	0.362777	0.400859	0.373592	0.369261	0.380818	0.540909	0.556975	0.474444	0.616073	0.581789	0.536814	0.548516	0.510735	0.4417	0.522616	0.479679	0.488282	0.389749	0.381974	0.39747	0.403276	0.348308	0.370083
Taok1	5.79634	5.08699	6.39113	5.43062	4.55073	5.07374	2.64951	3.01881	4.12418	3.59823	2.85678	3.86938	2.36807	2.40943	2.82139	2.66109	2.20098	2.83234	1.28686	1.03367	1.27636	1.82901	1.21659	1.4776
Dnttip1	0.451773	0.510959	0.499496	0.40134	0.463858	0.461754	0.372248	0.306568	0.288414	0.519514	0.400516	0.382821	0.539729	0.526075	0.312468	0.518914	0.546339	0.372291	0.592209	0.494678	0.497454	0.651526	0.520021	0.385958
Tnnc2	0	0	0	0	0	0	0	0	0	0	0	0	0	0	0	0	0	0	0	0	0	0	0	0
Acot8	0.245209	0.356902	0.209036	0.241979	0.310732	0.266484	0.334834	0.319653	0.22283	0.414803	0.350375	0.248618	0.416534	0.553381	0.344747	0.342533	0.476039	0.28372	0.339383	0.404564	0.200623	0.545091	0.550203	0.24879
Cd300lg	0.0421117	0.0353618	0.131171	0.0335138	0.0454166	0.0538418	0.0130691	0	0	0.00547981	0	0	0.00576894	0.00593979	0	0	0	0.00609071	0	0	0	0	0	0.0147334
Spint4	0	0	0	0	0	0	0	0	0	0	0	0	0	0	0	0	0	0	0	0	0	0	0	0
Pyy	0	0	0	0	0	0	0	0	0	0	0	0	0	0	0	0	0	0	0	0	0	0	0	0
Mpp2	0.06414	0.0792048	0.0494826	0.087076	0.162762	0.102508	2.2657	2.53927	2.73099	1.38695	2.58693	1.61623	3.18903	2.72736	3.94574	2.40558	3.2852	2.52108	1.50763	1.35656	2.38665	1.63907	1.87368	1.53782
Ppy	0	0	0	0	0	0	0	0	0	0	0	0	0	0	0	0	0	0	0	0	0	0	0	0
Vtn	1.17635	1.15757	0.482122	1.1117	0.867252	1.11626	0.266197	0.668669	0.115993	0.215258	0.0391993	0.279539	1.1079	1.08886	0.278294	1.28378	2.16647	0.478512	1.18991	2.86089	7.82552	10.1151	12.7366	17.3306
Nlk	0.46734	0.432416	0.436198	0.434395	0.462056	0.446387	0.973513	0.999645	0.837536	1.14084	1.03999	1.00933	0.676478	0.655314	0.58785	0.774143	0.701427	0.714869	0.252666	0.289117	0.242713	0.267243	0.228152	0.213962
Traf4	0.134102	0.234598	0.219845	0.266805	0.225978	0.375059	11.5662	9.92226	4.84492	23.8957	12.9949	11.419	26.2358	22.2486	9.15498	28.6511	18.4117	25.4686	4.58398	3.84842	4.33033	4.26025	3.89953	2.58046
Aldoc	4.17313	3.88783	2.67178	3.12458	5.4427	3.67016	8.40409	8.72119	5.29822	9.68779	11.533	9.24781	32.136	35.6128	18.4533	33.3605	56.7412	40.0177	998.894	909.071	986.572	820.751	1073.97	788.933
Stac2	0.0917525	0.0246942	0.0578531	0.0337012	0.0618457	0.0620389	0.0474578	0.0534921	0.0801721	0.151538	0.142995	0.129703	0.304564	0.283718	0.15266	0.302818	0.493433	0.255199	0.0630227	0.0494348	0.0374278	0.129151	0.133912	0.154331
Rpl19	0.282821	0.571732	0.257586	0.525181	0.360089	0.125556	0.373841	0.238168	0.158648	0.245348	0.385354	0.278788	0.365916	0.620534	0.203912	0.438971	0.562858	0.4545	0.806732	0.562487	0.333288	0.59633	0.362924	0.247372
Nek8	0.0787145	0.259669	0.138261	0.259522	0.151593	0.206672	0.296631	0.357949	0.248371	0.687729	0.425675	0.334913	0.677802	0.444102	0.401321	0.819066	0.4613	0.853849	1.28023	0.936389	1.19263	1.45562	0.899802	1.24911
Cacnb4	0.0344332	0.0220871	0.0250887	0.0232164	0.0277227	0.0374514	0.528862	0.533179	0.840819	0.347872	0.429643	0.560955	0.384244	0.394948	0.641598	0.316849	0.378283	0.414321	0.0240209	0.0305193	0.0173904	0.0288466	0.0299831	0.0221697
Plxdc1	0.601703	0.630257	0.719783	0.594077	0.802284	0.776819	0.00389029	0.00712553	0.00949289	0.00856373	0.0100253	0.0142985	0.0128794	0.0358042	0.00813418	0.045028	0.0597535	0.0271955	0.0125926	0.0087801	0.00284895	0.0203897	0.0155114	0.0115125
Arl5b	0.683012	0.613783	1.05784	0.546422	0.676038	0.654948	0.792089	0.87457	0.812146	0.66658	0.948731	0.715288	0.598335	0.616055	0.5229	0.523681	0.716575	0.621309	0.304944	0.400061	0.389433	0.319158	0.355856	0.393029
Zfp207	15.7042	17.2893	14.8163	14.8988	16.9002	13.2808	19.3967	19.6726	14.9775	22.2017	23.2845	18.5648	18.3737	18.3953	14.1732	18.3153	17.2237	15.8886	12.3533	13.9723	12.6308	14.3237	11.7978	10.134
Psmd11	0.812147	0.685697	0.685357	0.773477	0.757424	0.744731	0.994401	0.916232	0.828434	1.0828	0.979595	0.887559	1.20012	1.11735	0.813532	1.31782	1.21081	1.10145	0.855972	0.951181	1.01669	0.940225	1.14224	0.945584
C1qtnf1	0.00546175	0.0267535	0	0.00434662	0.00368149	0.00872889	0.0169501	0.016558	0.00344674	0.0106607	0.00873607	0.0173053	0.0187053	0.0192593	0.0118136	0.0381477	0.0220901	0.0236983	0.213369	0.136018	0.496518	0.729218	0.477591	0.936327
Pipox	0.00881594	0	0	0.00701599	0.00594238	0	0.00455993	0.00668165	0.0111269	0.0401513	0.0282022	0.00558657	0.0603854	0.00621737	0.0190687	0.0175929	0.0305624	0.0255014	0.905292	1.33789	0.754691	1.24277	0.959977	0.339282
Timp2	8.20636	8.7073	8.37498	8.70379	9.9904	9.58718	4.76861	3.93444	3.79319	3.19084	3.76687	4.04865	4.7008	4.27123	4.40462	3.87829	4.71264	4.86866	2.68119	3.10953	4.28512	3.477	3.83048	3.19245
Zc3h18	0.901179	0.869385	0.901252	0.856444	0.841372	0.850633	0.76933	0.625538	0.655207	0.768493	0.701281	0.593245	0.605283	0.606754	0.610316	0.544168	0.483618	0.470319	0.504564	0.340455	0.424205	0.523791	0.363285	0.392837
Top2b	3.30588	2.56419	3.73414	2.74127	1.79976	2.38091	2.65891	3.00665	2.87805	4.62856	3.33854	5.0792	2.23543	2.24081	1.68979	2.39758	1.81923	2.12166	0.849347	0.63826	0.631552	1.02112	0.672366	0.776496
Rarb	0.000612117	0.000214168	0.000501749	0.00024357	0.00123779	0.00122284	0.00269118	0.0025516	0.00135201	0.00318608	0.00391632	0.00349103	0.00754693	0.0127349	0.00231699	0.0116045	0.0129091	0.00774653	0.00717391	0.00285826	0.00278232	0.00414852	0.00378716	0.00294467
Igfbp4	8.45167	7.96988	4.60124	9.12159	6.58032	4.70951	0.598454	0.554921	0.18254	0.85865	0.650621	0.400964	2.08653	1.77858	0.51323	2.23677	1.95331	1.1897	0.807148	0.766784	0.636848	1.64182	1.0514	1.14641
Cdc6	0.029456	0.0566835	0.0120725	0.046884	0.034746	0.0176536	0.0418983	0.0279061	0.00929438	0.0574947	0.0353362	0.0139995	0.166453	0.296024	0.0238922	0.198389	0.191467	0.111833	0.205488	0.17193	0.217571	0.234569	0.206543	0.12882
Suz12	1.45745	0.94485	1.28492	1.206	0.962866	1.03035	0.377674	0.397485	0.426048	0.624004	0.421747	0.515953	0.488231	0.494516	0.343133	0.51751	0.35492	0.460983	0.368692	0.358542	0.30292	0.459517	0.310734	0.39029
Atad5	0.507217	0.335213	0.644644	0.693151	0.310809	0.569077	0.321977	0.310645	0.421935	0.473347	0.327796	0.396091	0.517624	0.489594	0.31029	0.580221	0.335987	0.414965	0.188714	0.125599	0.155253	0.222228	0.198644	0.228543
Crlf3	3.06955	2.49992	3.53552	2.3551	2.50791	2.7309	0.197792	0.289824	0.20871	0.244318	0.334296	0.18993	0.33508	0.327996	0.193741	0.29562	0.216966	0.209272	0.79213	0.643463	0.735983	0.663093	0.622385	0.542387
Krt27	0.0214565	0	0	0	0	0.0342915	0	0	0	0	0	0	0	0	0	0	0	0	0	0	0	0.0145418	0	0
Tns4	0.291737	0.316779	0.371072	0.300224	0.247502	0.217047	0	0.00381223	0.00634848	0.00327262	0.0026818	0.00637486	0	0	0	0	0	0.00363746	0.0224572	0.00782906	0.0114316	0	0	0
Tnfaip1	3.84347	4.4599	3.57679	3.88657	4.59906	3.34601	2.2114	2.40522	1.36851	3.07995	2.98921	1.86019	4.51649	4.39536	2.11646	5.18073	5.13411	4.18191	6.82855	5.85196	6.59805	6.7272	5.99941	5.53606
Abr	0.736678	0.671918	0.835124	0.777883	0.764591	0.789337	1.49264	1.3771	0.962788	1.30705	1.31435	1.23407	1.23118	1.07393	0.78894	1.10831	1.33105	1.13903	3.1178	2.71542	3.27624	3.14051	3.19735	2.80757
Rab11fip4	0.0500711	0.0537247	0.0729654	0.0549018	0.0862511	0.0773555	0.197981	0.249621	0.346177	0.122347	0.215943	0.115637	0.366592	0.341352	0.362814	0.420778	0.58761	0.283239	1.39969	1.18461	1.3251	1.34835	1.31534	1.0579
Cd40	0.0960607	0.124836	0.0899891	0.152896	0.0693747	0.14804	0	0.00520035	0	0	0	0	0.0281989	0.00483901	0	0.00684631	0	0	0.00765861	0	0.0103961	0	0	0.00600147
Slc35c2	4.40099	3.44714	3.30613	4.35506	4.09927	4.08754	1.04854	1.22595	0.55679	1.00458	1.00243	0.878591	1.63315	1.70374	0.789482	1.75022	1.72961	1.18494	4.05644	2.46047	1.98929	2.87592	3.15396	1.72716
Zfp334	0.271749	0.148562	0.160102	0.155441	0.23469	0.271441	2.23137	2.22694	1.82746	2.35927	2.47667	1.91578	2.64663	2.37165	1.76795	2.43186	2.38464	2.29067	1.59243	1.56633	1.60835	1.62303	1.56222	1.55983
Elmo2	1.62902	1.54226	1.60642	1.55227	1.77937	1.60803	1.1032	1.22762	1.13336	0.921117	1.17838	0.948067	1.22591	1.3952	1.25363	1.18745	1.58419	1.03722	7.1282	7.33724	6.8332	6.71436	8.08851	5.30734
Wsb1	17.572	12.9376	16.9953	10.8437	12.5094	11.3103	4.65694	4.93975	3.30908	6.20667	4.59741	4.11539	4.08119	4.33354	2.29357	5.41031	3.24514	3.80322	2.95675	3.73622	3.17792	4.75944	4.19106	3.38374
Ttpal	1.5017	1.48909	1.79098	1.40466	1.9189	1.94502	2.14246	1.94186	1.70671	1.70404	1.74171	1.86714	2.09132	1.93743	1.44704	1.66171	2.33159	1.75505	0.992985	0.908364	0.97589	1.1094	1.26815	0.628726
Rhot1	1.46319	1.45321	1.71221	1.35237	1.22297	1.38695	1.09295	1.23133	1.2214	1.29471	1.16535	1.31728	0.869517	0.997747	0.946182	0.86188	0.685661	0.777904	0.572177	0.647108	0.466322	0.600465	0.516112	0.471319
Hnf4g	0	0	0	0	0	0	0	0	0	0	0	0.00050201	0	0	0	0.000790451	0	0.000572889	0	0	0	0	0.00326756	0
Rhbdl3	0.0151143	0.00906546	0.0176987	0.01031	0.0116432	0.0189792	0.23453	0.307653	0.211201	0.324514	0.290103	0.309224	0.310578	0.20557	0.184475	0.27361	0.309391	0.234215	0.306073	0.235251	0.302609	0.276573	0.276082	0.168081
Ada	0.271307	0.312902	0.300637	0.347862	0.287858	0.297096	0.129935	0.140891	0.253649	0.166713	0.144652	0.213314	0.137655	0.102755	0.249946	0.165432	0.101602	0.254332	0.056079	0.0430107	0.0304495	0.0238355	0.045591	0.0395503
Serinc3	245.846	283.303	274.751	248.275	273.267	267.319	14.4633	14.6163	20.0824	12.2892	15.2943	20.4001	11.0085	11.9519	17.0669	9.87349	11.6296	14.4613	9.9344	11.8519	11.1128	11.4046	11.5045	11.3657
Tha1	1.59065	1.41391	1.8853	1.0435	1.39094	1.49438	0.333546	0.423577	0.0949551	0.279709	0.469884	0.435884	0.412255	0.485101	0.325457	0.235926	0.285654	0.435248	0.695784	0.518587	0.602515	0.684702	1.0462	0.545232
Pgs1	0.857037	0.795954	1.02794	0.832509	0.932368	1.0726	0.51663	0.558806	0.405636	0.410009	0.55774	0.433278	0.612932	0.684415	0.538405	0.411852	0.538878	0.375967	0.499403	0.539472	0.486948	0.390788	0.400285	0.300398
Birc5	0.530897	0.397122	0.52521	2.19993	0.444229	0.277948	0.624951	0.40237	0.219504	1.06007	0.497789	0.174012	3.43579	4.32509	0.643453	4.56658	2.31646	1.25768	3.51458	2.13707	1.83066	3.25067	1.55549	0.86466
Afmid	0.101986	0.101102	0.125396	0.169091	0.183316	0.183367	0.0879183	0.0579718	0.0429067	0.116121	0.0407817	0.0215425	0.0640347	0.113881	0.0551483	0.0848005	0.108031	0.0860443	0.104348	0.039685	0.20603	0.264958	0.0701096	0.141238
Trp53tg5	0	0.0242959	0	0	0.0702097	0.0277447	0.0359173	0	0.0219109	0.09036	0	0.0220019	0.142692	0.0489725	0.0187748	0	0.0601829	0.0251084	0.038754	0	0.026303	0	0.0572838	0
Pigt	7.84895	8.15374	9.6958	9.82584	10.923	11.117	14.8307	13.5936	12.0491	18.512	15.5519	13.4055	19.3528	18.1067	15.6537	20.723	18.9235	21.6519	23.1571	18.3767	23.9766	24.1245	20.4249	20.9137
Wfdc2	0	0	0	0	0	0	0	0	0	0	0.0311788	0	0	0	0	0.0388995	0	0	0	0.0151702	0	0	0	0
Etv4	0.0456258	0.0106424	0.0124664	0.0363104	0.00512568	0.0243062	0.468054	0.380381	0.0671837	0.761926	0.470306	0.250576	1.94282	2.21487	0.571565	2.32936	1.71353	1.66624	1.5193	1.72214	1.25009	1.54096	2.01992	0.877957
Eppin	0	0	0	0	0	0	0	0	0	0	0	0	0	0	0	0	0	0	0	0	0	0	0	0.0197965
Dbndd2	0.362491	0.380486	0.351156	0.301594	0.388718	0.539828	30.5104	32.6684	43.9421	31.2068	25.7398	46.902	12.2114	11.4691	24.1009	4.80061	7.82555	11.2839	2.04141	3.61609	2.25931	3.47292	2.24273	1.84469
Mmp9	0.709774	0.551858	0.400794	1.2929	0.55816	0.321399	0.00407913	0.00597713	0	0.00513109	0	0.0199901	0.00540183	0.0667417	0.0127935	0.0314758	0.0182266	0.0114062	0	0	0	0.0160346	0	0
Slc12a5	0.122117	0.138861	0.165163	0.111762	0.174916	0.192727	0.153172	0.150399	0.104037	0.272126	0.297873	0.212808	0.911732	1.09591	0.381348	1.59316	2.15025	0.975831	0.218087	0.330254	0.252096	0.250358	0.584284	0.200271
Ghdc	3.90931	4.28912	3.81763	3.84091	5.02615	4.53158	2.65861	2.83486	1.3858	3.10872	3.38379	2.61491	3.43804	3.18247	2.92297	2.81715	3.23475	3.22843	2.2356	2.89215	2.02922	3.45085	2.64761	1.8363
Pltp	1.77687	1.6548	1.44578	1.7832	1.84498	1.43032	0.0844727	0.183191	0.0371027	0.0510035	0.0417956	0.057955	0.125288	0.161247	0.0494545	0.117327	0.21137	0.075586	1.93955	1.42859	1.55395	2.01445	1.49274	1.17705
Slc12a7	0.355151	0.356876	0.39941	0.371954	0.382066	0.443861	0.0146958	0.0118435	0.00896498	0.0258799	0.0212077	0.016204	0.0437874	0.0340636	0.0184364	0.0552811	0.0492484	0.0554755	0.136365	0.164731	0.265823	0.186782	0.192192	0.134195
Ctsa	96.2697	108.148	93.013	102.106	133.817	108.379	16.3118	15.9749	16.6659	12.8892	16.5967	17.7135	14.7665	14.4026	19.2507	11.046	13.2304	14.1154	18.6975	17.5258	20.4701	15.8942	18.0726	16.168
Zswim1	1.24953	0.834631	0.535396	0.700611	0.727396	0.816949	1.24854	1.07617	0.627248	1.47815	1.43841	0.899792	2.54818	2.20306	0.767815	2.18185	2.60892	1.72508	2.82109	1.85648	3.57129	2.65603	2.60038	1.73873
Slc12a4	0.596694	0.498835	0.571346	0.647163	0.658471	0.62028	1.71796	1.73291	0.83975	1.72812	1.74553	1.50578	2.63672	1.95138	1.07648	2.11806	2.0045	1.79476	4.20827	4.10128	3.79631	3.88295	4.02062	2.80351
Spata25	0.110659	0	0	0.0880657	0.0372948	0.13264	0	0.0419345	0	0	0	0.0350617	0	0	0.0598381	0	0	0.0800242	0	0	0	0.0374987	0	0
Myo1c	2.04122	1.80145	2.51809	1.90733	2.2418	2.60087	0.152329	0.134693	0.0865174	0.181702	0.178678	0.173754	0.264326	0.257831	0.178471	0.314119	0.266976	0.290085	0.300381	0.296374	0.311581	0.478341	0.280645	0.302004
Crk	4.23827	3.76286	3.99555	3.10269	3.02775	2.99176	3.57065	3.53799	3.38263	3.76434	3.98542	4.28194	2.95308	3.23152	2.49171	2.81784	2.81887	2.76964	2.22619	2.33163	2.08733	1.97515	2.33676	2.02647
Cox7c	1.42299	1.47371	0.979787	1.40424	0.920796	1.00064	2.2375	1.29419	1.86784	2.7775	2.57954	1.55098	2.7681	3.77334	1.75439	3.18044	4.11091	2.67552	6.16261	6.55598	3.27715	5.5164	6.57365	2.6884
Pitpna	6.40266	5.97582	5.99011	6.4779	5.6736	5.9562	3.56388	3.4298	3.03085	4.06507	4.12973	3.56702	4.94749	4.30952	3.82057	4.64936	4.51752	4.10654	3.20337	3.22646	3.24469	3.98709	3.64641	3.07204
Mlx	2.14553	1.82187	1.87724	1.51562	2.35616	0.982451	1.68332	2.15596	1.27791	1.61552	2.3007	1.51236	2.29521	3.21325	1.53822	1.82809	2.28431	2.14429	2.42169	1.70726	1.49754	1.5848	2.40629	1.4549
Retreg3	1.01851	1.12552	0.884461	1.07138	1.42063	1.00325	0.920613	0.775754	0.820935	0.898868	1.10489	0.805175	1.12588	1.04188	1.1015	0.915637	1.20027	1.03189	0.596556	0.773027	0.718113	0.799628	1.01489	0.745314
Jph2	0	0	0	0	0	0	0.000995489	0	0	0	0	0.00121962	0.00263657	0.00135733	0.00104073	0	0	0.00278363	0.0150376	0.017974	0.0874823	0.0130439	0.0111138	0.016834
Dhx58	1.91179	1.96683	3.45589	2.15624	2.12498	3.56126	0.0785842	0.038383	0.0479393	0.0988502	0.101255	0.152438	0.0953938	0.0625029	0.150618	0.0631645	0.0146306	0.0549351	0.0706588	0.0295598	0.0575489	0.0772264	0.0208887	0.0221479
Rab5a	0.618346	0.643194	0.821927	0.784696	0.670253	0.647692	1.24259	1.11145	1.24448	1.2015	1.27417	1.38468	0.786984	0.925204	0.811065	1.00467	0.885939	0.915476	0.802103	0.721835	0.560228	0.775853	0.589364	0.694325
Hspb9	0.655712	0.458842	0.537483	0.391376	0.331487	0	0.763106	0.372725	0.517248	0.853248	0.786608	0.311638	1.01055	0.115609	0.443215	0.327131	0.757723	0.711277	0.731889	0.127576	0	0	0	0.143381
Nkiras2	2.14588	2.13805	1.63083	2.52205	2.25107	1.74882	3.27834	3.31737	2.81601	3.37485	3.6748	2.59357	3.43611	2.43542	3.9883	2.0986	3.31725	3.0728	3.41035	3.03036	2.66994	2.46563	2.37981	2.05094
Ppp2r5c	0.874253	0.752475	0.766784	0.917703	0.719523	0.762881	0.661563	0.597666	0.69571	0.745145	0.662826	0.686412	0.685057	0.649238	0.613152	0.748451	0.57181	0.63918	0.440095	0.379653	0.347049	0.54748	0.369254	0.394572
Ift52	1.44085	1.21915	1.2589	1.41938	1.19662	1.22725	0.820003	0.851095	0.627896	0.808525	0.744002	0.685445	0.684342	0.701697	0.665276	0.560238	0.601122	0.680713	0.981536	0.880361	0.713101	0.744278	0.626658	0.610268
Mybl2	0.0356531	0.0221766	0.0194831	0.0599003	0.0293724	0.022159	0.0266372	0.0450362	0.0149997	0.0644358	0.0443545	0.0200827	0.113964	0.173215	0.0428427	0.158108	0.119022	0.0544307	0.198976	0.32063	0.267096	0.233579	0.176468	0.135132
Sgk2	0.00443511	0	0.00363544	0	0.00298949	0.0177203	1.58286	1.64708	1.38264	0.805084	1.485	1.05112	0.370619	0.563009	1.35741	0.115058	0.51251	0.458644	0.0693051	0.0069032	0.0235193	0.00601165	0.0256107	0.00387922
Eya2	0.000672615	0.00094134	0	0.000535287	0.00136013	0.00322489	0.070624	0.075957	0.0454178	0.137413	0.0731576	0.140656	0.00783211	0.0175512	0.0116388	0.0147648	0.0159338	0.0301573	0.00450454	0.00785188	0.00560507	0.00774952	0.00277431	0.00470648
Prl3c1	0	0	0	0	0	0	0	0	0	0	0	0	0	0	0	0	0	0	0	0	0	0	0	0
B4galt5	0.484863	0.550729	0.53184	0.452976	0.582596	0.632649	0.201116	0.188178	0.10495	0.281938	0.221047	0.185539	0.569561	0.626075	0.225455	0.645055	0.603603	0.469206	0.386939	0.461196	0.480884	0.449257	0.544899	0.317556
Gdap1l1	0.0705411	0.049362	0.0462578	0.0729803	0.080832	0.0845533	0.682298	0.572059	0.311614	1.05102	0.880078	0.496183	2.74444	2.63667	0.75145	3.06176	2.76745	1.56099	1.66921	1.61401	1.1062	1.29082	1.4257	0.740395
Hnf4a	0	0	0	0	0	0	0	0	0	0	0	0	0	0	0	0	0	0	0	0	0	0	0	0
Ptgis	0.00487091	0	0.00199633	0.00193821	0	0.00194615	0.00629854	0.00553753	0.00307387	0.0142612	0.00908952	0.00308664	0.0583863	0.0532451	0.0105356	0.0315909	0.0253291	0.0299408	0	0.00758151	0	0.0132047	0.00200908	0.010651
Cadps2	0.00453422	0.00432664	0.00219622	0.00360847	0.00291737	0.00395265	0.028996	0.0260862	0.0172985	0.0445195	0.0307681	0.0253372	0.0487038	0.0469484	0.0263017	0.055113	0.0507291	0.0448623	0.0163332	0.0144357	0.0145206	0.0223491	0.0221025	0.0178466
Ddx27	1.66654	1.48193	1.5288	1.61835	1.37071	1.3846	1.9356	1.91058	1.49592	1.601	1.51084	1.9177	1.59069	1.25169	1.20698	1.48877	1.06024	1.15297	1.30949	0.828752	1.00728	1.08054	0.784171	0.684098
Cyth3	0.576622	0.575884	0.771114	0.672181	0.624977	0.726855	0.122521	0.129261	0.158026	0.164686	0.140728	0.174122	0.247546	0.243422	0.215921	0.322789	0.265906	0.277994	0.291589	0.298115	0.361975	0.421986	0.328282	0.432129
Cyth4	22.3732	21.787	23.9919	20.9262	24.8168	23.1303	0.118159	0.169531	0.243276	0.207465	0.172548	0.392065	0.127135	0.097336	0.0540441	0.156708	0.131992	0.261569	0.0903064	0.0407423	0.0648981	0.0806374	0.0981512	0.0749289
Rac3	0.570697	1.1315	0.62373	1.05975	1.37843	0.57005	0.393581	0.576713	0.150062	0.526024	0.735335	0.331508	1.17271	1.20744	0.282884	2.37265	1.42888	0.756627	0.583915	0.703224	0.432342	0.354549	0.470786	0
Rrp7a	0.761194	0.798981	0.759135	0.93896	0.778175	0.750192	0.872741	0.971136	0.40831	0.891456	0.946967	0.514518	1.02539	1.48522	0.610556	0.708877	0.908937	0.889919	0.821305	0.799732	1.02837	0.988783	0.879106	0.388375
Cyb5r3	8.68737	6.80196	6.1263	9.74153	7.66781	6.9619	6.10283	7.03227	6.27561	8.55529	6.7022	8.08413	10.7202	8.6634	7.7363	8.30803	8.70853	9.12203	16.1217	14.6405	16.9812	22.4586	12.2847	15.6433
Ints2	0.66401	0.556869	0.725022	0.661557	0.573991	0.696673	1.07886	1.08527	1.09397	1.2565	1.05668	1.11136	0.713475	0.875806	0.712637	0.935652	0.754134	0.848573	0.376234	0.374751	0.408955	0.456893	0.455773	0.376844
Med13l	1.11326	1.02474	1.17088	1.13864	1.06143	1.14701	0.440721	0.376562	0.368487	0.547581	0.39302	0.417833	0.512465	0.44168	0.386365	0.520072	0.473869	0.542727	0.233229	0.316651	0.359246	0.332009	0.296385	0.327959
H2bc4	0.791499	1.32736	0.872508	0.879686	1.54534	0.992341	4.43274	3.7234	4.10787	2.29073	3.61611	2.51647	3.37437	4.14799	5.88866	1.04846	2.75968	1.99347	8.60604	7.30679	5.91344	7.65794	8.92717	5.81287
Baiap2l2	0	0	0.00356297	0.0172962	0.0175794	0.0173671	0.0292276	0.0461215	0.0329168	0.0537337	0.053303	0.0302991	0.0535916	0.0919645	0.0446586	0.112765	0.0728327	0.0534373	0.0727753	0.0236796	0.0230505	0.032405	0.0179287	0.0152076
Mafk	1.03485	0.828664	1.32049	1.28204	0.963612	1.3896	0.63459	0.509403	0.437618	0.44424	0.494866	0.520563	0.833055	0.55677	0.582664	0.415154	0.419163	0.47062	0.23816	0.340412	0.468765	0.455518	0.281627	0.335929
Med1	4.01561	4.25741	5.00604	3.77742	4.29181	4.45545	3.01692	3.10914	2.7292	3.32128	2.82025	2.6966	2.44183	2.30022	2.10737	2.64906	1.98299	2.27719	1.28337	1.46139	1.51667	1.6192	1.57289	1.25584
Erbb3	0.102043	0.0939548	0.0572301	0.0854829	0.0941227	0.0815417	5.96974	5.6091	7.58178	3.0121	5.63244	3.94788	5.63942	5.20041	10.9545	2.47041	4.1892	5.12281	0.15586	0.213164	0.252257	0.240233	0.30127	0.559005
Stard3	2.2783	2.76802	2.72845	2.4993	3.06785	2.28824	1.08112	1.13267	1.23331	0.724162	1.05869	0.698688	1.00218	1.18664	1.53149	0.896791	0.926894	0.812451	0.723233	0.695402	0.807562	0.79683	0.439686	0.475332
Ikzf3	0.0336932	0.0143513	0.0240158	0.0244824	0.0167863	0.0199003	0	0	0	0	0	0	0	0	0	0	0	0	0	0	0	0.000992828	0	0
Mfng	2.81025	2.30213	2.6967	2.82248	3.04627	3.33608	0.0663887	0.107519	0.0554205	0.052743	0.0792385	0.0856165	0.0555259	0.0571703	0.0620999	0.0741451	0.0546446	0.0928195	0.512734	0.446874	0.419649	0.489885	0.156037	0.389973
Vmp1	0.385178	0.481665	0.555449	0.399254	0.53849	0.539588	1.48684	1.44973	1.54697	0.819889	1.11746	0.960514	1.06021	1.00693	1.7209	0.674944	0.717796	0.783195	0.676736	0.599525	0.599809	0.584942	0.514866	0.500151
Uchl5	0.767547	0.655537	0.758211	0.689149	0.58104	0.65423	0.335926	0.438533	0.317948	0.460973	0.356765	0.451466	0.38554	0.491339	0.304367	0.404526	0.275184	0.281799	0.175737	0.349213	0.241533	0.290774	0.165599	0.199681
Glrx2	0.994616	1.02029	1.14256	0.947584	0.807388	1.02838	1.54889	1.71029	1.36783	1.9089	1.83608	1.66267	1.658	1.79007	1.20482	1.57577	1.42948	1.5365	1.66724	1.91155	1.42326	1.72025	1.71156	1.64324
Ro60	0.936201	0.696259	1.10846	0.637077	0.752987	0.860146	2.21767	2.62568	2.85414	3.07796	2.49334	3.01216	2.10035	1.95204	1.99318	2.04877	1.69594	2.35159	0.913712	0.700434	0.729794	1.29351	0.973772	1.00874
Stk4	2.40759	2.27918	2.59778	2.37894	2.26595	2.36751	0.525245	0.590973	0.562494	0.666146	0.573401	0.551572	0.542691	0.548926	0.460865	0.61518	0.509361	0.533619	0.435945	0.427713	0.46179	0.473629	0.375126	0.430681
Wfdc15b	0	0	0	0	0	0	0	0	0	0	0	0	0	0	0	0	0	0	0	0	0	0	0	0
Pmp22	16.0667	19.8437	16.9435	14.8999	22.8285	19.7491	2.65479	3.03247	2.29923	3.58483	4.45311	2.69809	7.52133	8.9534	4.71404	9.31919	7.32406	8.53133	7.12209	7.93139	8.81942	7.58168	8.79854	8.15218
Gdf9	0.328165	0.25381	0.268996	0.316146	0.430758	0.45546	0.19654	0.104724	0.108997	0.191038	0.211802	0.08756	0.23661	0.280159	0.121415	0.292973	0.229528	0.187355	0.289176	0.376368	0.222439	0.304349	0.29921	0.0604281
Zcchc10	0.661644	0.626969	0.451955	0.548495	0.687554	0.45161	0.335097	0.36565	0.321855	0.439452	0.551197	0.296988	0.58538	0.563831	0.320511	0.797719	0.637149	0.598093	0.600039	1.00838	0.365488	0.579207	0.53444	0.421979
Prl8a2	0	0	0	0	0	0	0	0	0	0	0	0	0	0	0	0	0	0	0	0	0	0	0	0
Tbx5	0	0	0	0	0	0	0.00116977	0.00171405	0	0.00147144	0.00241159	0.00143313	0	0	0.00122293	0.00225657	0	0	0	0	0	0	0	0
Psmb6	15.6014	17.6279	11.4979	19.1367	18.8133	13.0389	34.4996	31.2425	20.7751	29.8003	34.6209	23.2498	45.3597	44.6841	24.7158	42.1308	40.0544	29.2237	49.6324	36.0539	29.8913	49.5376	36.2095	22.9519
Spag7	9.38992	6.74749	6.12643	7.13767	7.22332	4.64337	9.20181	6.79753	3.76001	7.7668	8.03716	4.86964	9.15723	6.7261	3.26738	8.17176	4.81715	3.82151	8.74183	5.29231	3.93954	7.51963	4.5851	3.48039
Pfn1	112.68	123.706	69.56	149.287	130.543	77.2611	44.2232	43.0711	29.4206	46.3289	60.372	31.0792	50.0263	59.6074	35.7903	44.3951	57.5352	39.6508	71.8349	61.3748	57.3919	70.6877	65.8989	36.3495
Tomm34	2.93934	3.50039	2.79619	2.88109	3.13548	2.90368	2.11313	2.48322	1.30185	2.51333	2.58797	1.58494	2.9461	2.87169	1.56391	2.30726	2.66043	2.2475	2.122	2.18259	1.86924	2.4033	2.14113	1.55671
Ywhab	11.2319	11.6962	10.8972	12.101	11.9174	10.3379	13.9788	14.2844	12.2177	15.7871	15.7502	15.5164	12.7958	12.7562	10.5641	13.3953	12.4649	11.1779	6.2375	7.76643	6.62652	7.76222	6.51036	6.01852
Ksr1	0.0795494	0.0806838	0.114294	0.130172	0.118688	0.11785	0.116503	0.116517	0.0868648	0.125031	0.142489	0.101952	0.194075	0.202344	0.15708	0.143586	0.232395	0.171288	0.204519	0.226767	0.313509	0.210201	0.175486	0.216554
Gpx3	3.49464	3.49495	3.38089	4.20155	3.89224	3.57157	1.17142	0.841188	0.321811	2.25419	0.991587	0.560757	5.30102	4.50603	1.11111	6.68949	4.58427	3.66605	0.920749	0.828744	1.04534	1.03683	0.965071	0.537861
Anxa6	1.77822	1.49075	1.62613	1.70585	1.69103	1.5503	0.992167	0.84212	0.253974	1.48427	1.19531	0.612624	2.5289	2.15646	0.616204	2.40064	2.12816	1.55958	2.7343	1.88263	2.43245	3.08183	2.60183	1.89396
Il12rb2	0.0266067	0.0293973	0.0459144	0.0390054	0.0368123	0.0503554	0	0	0.00176743	0.000911106	0.00149324	0.000887387	0	0.00296276	0.00227169	0	0.000809104	0.00202536	0.0203195	0.00108981	0.00424344	0.000949065	0	0.00244966
Zkscan6	0.52249	0.610621	0.525419	0.518695	0.461108	0.606908	0.353834	0.318432	0.265141	0.367983	0.267087	0.31403	0.30992	0.315299	0.20389	0.39772	0.298776	0.272671	0.336687	0.415009	0.244839	0.233639	0.186627	0.179032
Kpna2	0.0980232	0.0685929	0.0982045	0.0953453	0.102779	0.0522197	0.0845021	0.0908017	0.0481128	0.120467	0.104525	0.0897236	0.231266	0.215071	0.0942319	0.304287	0.151031	0.204783	0.145881	0.127143	0.148519	0.199301	0.116801	0.123842
Smurf2	1.61653	1.72198	1.71029	1.59096	1.71602	1.68429	1.51408	1.67444	1.69974	1.78469	1.71936	1.5564	1.12343	0.97183	1.28342	0.973196	1.01179	1.17414	0.56542	0.602838	0.686118	0.77947	0.692579	0.650671
Cep95	1.53799	1.45575	1.77194	1.24556	1.2952	1.51071	0.893693	1.12161	1.28107	0.947729	0.991443	1.07035	0.594395	0.69123	0.877747	0.494781	0.470058	0.479065	0.281067	0.449227	0.267071	0.396461	0.294015	0.328681
Vezf1	3.82914	3.75127	4.05665	3.46707	3.79362	3.83345	6.38267	6.51061	4.78274	11.2862	7.04533	8.12185	10.8821	10.6337	8.01666	14.2014	8.56167	13.4274	4.74977	5.18408	6.31068	6.81101	4.61897	5.90848
Cuedc1	0.00123694	0.00259669	0.00608348	0.00393757	0.00333504	0.00494215	0.33845	0.265308	0.200613	0.392736	0.304687	0.196743	0.573589	0.529512	0.331758	0.644256	0.49385	0.493768	0.447328	0.442815	0.450729	0.449338	0.449993	0.390567
Srsf1	16.2014	12.4578	12.517	10.8187	9.18834	9.03274	13.9281	15.4407	11.9987	17.8108	13.4535	13.9131	11.3396	12.0957	7.38124	14.1588	9.17806	8.94205	8.3351	10.1739	7.37832	8.4182	5.97588	4.70729
Abi3	4.02484	5.57921	6.18196	5.03342	6.15579	6.97613	0.0247833	0.0363148	0.0665224	0.0311746	0.0817489	0.0971618	0.0196917	0.0135166	0.0259096	0.0382471	0.0166107	0.0693001	0.0106962	0.0596629	0.0145195	0.0259788	0.00790528	0.00838183
Shroom1	0.0562673	0.181119	0.138366	0.0626908	0.174464	0.143881	0.820719	0.784673	0.490017	1.2081	0.947994	0.527709	1.17164	0.793641	0.754569	0.752315	0.903792	0.659182	0.213534	0.0875793	0.247233	0.190671	0.148533	0.177173
Kif3a	1.09268	0.868006	1.03367	0.883259	0.919492	1.0022	4.33833	4.57304	3.82291	6.25303	4.31439	4.0979	4.67421	4.34736	3.23672	4.96104	3.63713	4.1174	1.19277	1.28893	0.970948	1.59054	1.08563	1.08796
2021-09-08	3.14099	2.94431	2.70322	2.87418	2.74361	2.42533	13.8794	13.4721	10.1583	16.9689	14.1981	11.4455	12.5568	11.7672	9.27478	10.2786	9.71757	10.6086	5.18224	4.56847	6.41072	6.6281	5.58979	5.58377
Mtmr4	1.89546	1.76734	1.98147	1.62992	2.01767	1.46744	3.48106	3.51495	2.51039	2.56577	2.86904	2.04037	2.46847	2.33325	2.08719	1.65547	2.38378	1.5701	1.47822	1.2529	1.31659	1.34801	2.34747	0.930137
Mrm1	1.10487	0.876235	1.22264	0.981876	1.06746	0.941757	1.42871	1.20026	0.778597	1.40178	0.95235	1.26027	0.920763	0.870111	0.766733	0.826824	0.829897	0.572618	1.39766	0.601903	0.571963	0.911054	0.638013	0.37045
Mapt	0.0295054	0.0256019	0.0251528	0.048841	0.0540956	0.0264068	1.96016	2.11189	1.67058	2.3382	2.23133	2.08661	1.38317	1.46991	1.31659	1.2306	1.45793	1.22219	0.540104	0.660398	0.574903	0.765478	0.583185	0.41498
Kansl1	1.25654	1.27661	1.52486	1.38354	1.38209	1.44803	0.575602	0.601024	0.549656	0.783906	0.626499	0.538613	0.639807	0.613025	0.551535	0.723932	0.661211	0.723652	0.370681	0.445305	0.56823	0.532103	0.434431	0.418467
Gid4	1.02024	0.98965	0.893963	1.01352	0.875032	0.705628	1.43755	1.44251	1.17446	1.80141	1.58123	1.594	1.52777	1.52091	1.06533	1.57964	1.46354	1.39164	0.977771	1.19373	0.975458	1.24462	1.02447	0.812361
Myo1b	0.335163	0.314045	0.375486	0.319624	0.327073	0.352913	0.0255048	0.0270812	0.0144314	0.0390566	0.0243852	0.0330584	0.0949616	0.090718	0.0452127	0.114088	0.11933	0.095607	0.0430734	0.0383749	0.0346485	0.0542451	0.0394981	0.0356285
Dhx40	0.7913	0.784616	0.863998	0.639465	0.794915	0.808102	1.00505	0.967904	1.17418	0.985951	0.959444	1.14421	0.878929	0.833855	1.04247	0.737727	0.903814	1.04284	0.668389	0.71331	0.692045	0.871731	0.723338	0.892539
Ypel2	0.400433	0.421037	0.54252	0.386375	0.380394	0.494067	2.33411	2.50026	4.3928	0.511616	1.37059	1.4686	1.0957	0.948169	4.06025	0.227722	0.710878	0.886737	0.064843	0.125946	0.116312	0.0492153	0.0787315	0.0344799
Akap1	0.284863	0.255938	0.256563	0.237898	0.350837	0.334422	0.954993	0.91424	0.601446	1.16695	0.909402	0.942689	1.16349	0.873036	0.616152	1.16852	0.98551	0.760427	0.435719	0.500862	0.599454	0.612553	0.533811	0.359896
Nol11	1.13522	1.18242	1.26072	1.06998	1.24829	1.17469	1.42059	1.28464	0.957403	1.79376	1.48108	1.33599	1.58741	1.53111	0.743991	1.69124	1.20906	1.32411	0.753256	0.810195	0.828302	0.858016	0.807013	0.718389
Derl2	4.78128	5.24169	4.95663	4.2229	4.87215	3.9855	3.55926	3.6735	2.70967	3.10474	3.274	2.58428	3.41625	2.80997	2.08864	2.29181	2.20463	1.97289	4.16476	3.80126	2.5071	3.19596	3.64262	2.337
C1qbp	6.73241	6.5218	5.0868	8.1279	6.65262	7.13649	9.59397	8.83397	5.96829	12.1873	11.1836	9.76597	10.4306	9.10837	5.20073	9.45938	8.28258	8.19716	12.4476	9.76607	10.9985	12.633	9.653	7.73126
Rpain	3.50928	3.44884	4.21893	3.62442	3.7952	3.21553	2.32337	2.69517	1.83073	2.78047	2.80239	2.1645	2.84172	2.84888	1.77955	2.59891	2.35204	2.06406	2.94208	2.54901	2.10319	2.98088	3.61543	1.70524
6330403K07Rik	2.04128	2.38068	2.41688	2.76768	4.17873	3.0811	24.284	20.9717	6.3455	39.3514	34.2626	16.1453	91.1929	80.3507	21.9944	83.6582	79.5893	59.9763	141.684	101.848	137.859	130.454	98.4155	80.4764
Slc13a3	0.231764	0.229246	0.18569	0.271813	0.259584	0.270142	0.0703037	0.0990535	0.0945732	0.049886	0.0864051	0.0739853	0.0620669	0.087255	0.081037	0.111279	0.18828	0.0529271	3.07509	3.11916	2.42111	3.55956	3.49172	1.99514
Kcnab3	0.29782	0.159367	0.287202	0.390376	0.24798	0.307981	0.253719	0.61077	0.265334	0.695292	0.495044	0.421857	1.39196	1.0996	0.521026	1.55573	1.47783	1.05152	0.488852	0.259044	0.238891	0.736132	0.3902	0.536306
Chd3	2.21478	1.92534	2.72503	2.14261	2.40331	2.88549	7.61908	7.56918	5.47878	11.2232	8.03558	8.4526	4.92801	4.58003	3.49452	5.21841	5.43926	4.56813	2.27411	2.54829	2.09128	3.3935	2.33351	2.11618
Kdm6b	1.76309	2.53876	2.05539	2.58173	2.52471	1.9912	7.85479	7.87498	4.84611	10.2271	9.48375	7.22488	5.27604	4.82993	3.41945	4.94137	5.03006	4.73165	3.58598	3.15281	3.00375	3.98832	3.21913	2.20007
1700125H20Rik	0	0	0	0	0	0	0.0171695	0	0	0.00719911	0	0.0140234	0	0.0546239	0.00598325	0.0110404	0.00639314	0.00800168	0.037051	0	0	0.0224971	0	0.009678
Appbp2	2.11785	1.93718	2.10232	1.83561	1.86768	1.92647	4.02984	4.13043	4.65818	3.73479	3.59003	3.67689	2.81454	2.8296	3.43161	2.8638	2.46168	3.01461	1.06694	1.29653	1.14547	1.31587	1.16745	1.25086
Wnt9b	0	0	0	0	0.00356723	0	0.00547468	0	0	0.0275462	0	0.00335364	0.00362495	0.00746461	0.00286174	0.00528054	0.0122311	0.00765427	0.0177212	0.00411865	0	0.00358673	0.00436573	0.0138867
Adora2b	0.0136067	0.0190429	0.0111533	0.0108286	0.0137574	0.032619	0.387084	0.443441	0.0987476	0.765775	0.536843	0.280229	1.23024	1.4442	0.441464	1.58846	1.2854	1.2841	1.67821	2.22905	1.27304	1.64147	1.84083	1.02351
Ncor1	3.02398	2.91018	3.19097	2.81455	2.72377	2.85215	1.59829	1.63716	1.5558	2.00666	1.6377	1.6974	1.60331	1.54404	1.38015	1.80237	1.62304	1.76531	0.74768	0.734785	0.871115	1.05647	0.958923	0.93188
Trpv2	1.70311	1.6263	1.99112	1.68969	1.81276	2.10526	0.068489	0.0519086	0.0201701	0.101005	0.124156	0.049188	0.253327	0.251169	0.0938228	0.28702	0.250625	0.151889	0.0611571	0.031981	0.0207542	0.0216616	0.0112999	0.0319494
Cenpv	0.489837	0.366007	0.387906	0.363398	0.30779	0.517477	0.549666	0.604068	0.199094	0.896685	0.880877	0.426149	1.93918	2.23081	0.561178	1.94673	1.72691	1.40492	1.32516	1.16948	1.01891	1.35605	1.13691	0.59546
Pcgf2	0.386861	0.220843	0.375522	0.396997	0.377421	0.585734	1.07948	1.33485	0.539668	2.15934	1.76408	1.36768	3.30531	2.72113	1.37076	3.0271	2.62934	3.13629	1.80676	1.25975	1.89727	1.61453	1.12537	0.899357
Cwc25	0.902284	0.75766	0.89214	0.704601	0.752628	0.793109	0.848801	0.820615	0.722429	0.752159	0.998215	0.732578	0.992704	0.970401	0.811141	0.737112	0.915583	0.848245	0.692386	0.715363	0.777529	0.955482	0.758279	0.720138
1700001P01Rik	0	0	0	0	0.0180548	0.0428083	1.03909	1.21806	0.963501	0.348549	0.756903	0.628029	0.458675	0.717833	1.01389	0.0267264	0.417862	0.154962	0.0597948	0	0.0202919	0.072614	0.0441926	0.0234283
Pip4k2b	2.24044	2.25736	2.22553	2.48724	2.54857	2.37852	1.28991	1.39623	1.01027	1.49956	1.34465	1.06289	2.46308	2.35164	1.24413	1.95856	2.39609	1.95762	1.93054	1.65283	1.24325	1.93278	2.06721	1.40375
Trim37	0.364392	0.303853	0.287242	0.333443	0.391107	0.2993	0.404536	0.397422	0.24518	0.565035	0.523274	0.435272	0.870532	0.842587	0.370742	1.03882	0.930929	0.651899	0.691575	0.786531	0.661755	0.943098	0.742594	0.611897
Ybx2	0	0	0.050311	0	0	0.0163488	0.0211646	0.0620247	0	0.0266227	0.0436327	0	0.0980959	0.0721436	0.0442528	0.122484	0.0236422	0	0.182689	0.20699	0.21699	0.37438	0.253162	0.178949
Ctdnep1	3.69944	3.69818	2.82613	3.3547	4.47832	3.08691	3.18915	3.19484	2.09637	3.83149	3.58927	2.67122	3.91298	3.69165	2.70129	3.62849	4.14411	3.33046	4.01686	4.17171	3.73677	3.43679	3.39434	2.92759
Elp5	1.7293	1.63479	1.17216	1.55487	1.55791	1.22907	3.39292	3.41524	2.2823	3.46194	3.53287	2.56574	4.21976	4.30955	2.44117	3.99846	3.96784	3.13843	5.36373	3.73982	2.98543	4.23725	4.20422	2.2761
Slc2a4	0	0.0147221	0	0.0167432	0.0850869	0	0	0	0.0132769	0	0.0336514	0	0.0288212	0.0593496	0.113766	0.104961	0.182339	0.0760719	5.98814	4.55176	5.164	3.82132	4.75541	3.97477
Gabarap	22.7833	29.9857	20.2615	28.2406	29.9568	22.9694	22.3257	22.779	15.4808	22.0118	29.503	16.6526	22.0402	29.7363	23.9648	20.3974	29.4835	23.7886	38.2149	35.5834	31.7772	33.8433	39.4431	26.1243
Cldn7	0	0.0267756	0	0.0304516	0	0.122306	0.0197915	0	0	0	0.020401	0.0242474	0	0	0.020691	0	0.0221084	0	0	0	0	0	0	0.0334679
2810408A11Rik	0.392345	0.297427	0.670006	0.468359	0.352613	0.391899	0.236758	0.2478	0.226963	0.212725	0.400938	0.186469	0.985377	1.03762	0.318237	1.30492	0.415601	0.401948	1.64222	1.5267	1.56045	2.37099	1.888	0.714934
Phf23	7.49819	7.23174	6.6987	5.60969	6.92817	6.01419	3.87834	4.93797	2.65835	3.32544	5.43519	3.14989	5.30906	4.67407	2.88529	3.81086	5.12744	3.10722	7.2095	7.1686	4.12733	5.11984	5.838	3.2669
Acadvl	1.00025	0.779473	0.819899	0.886485	0.873418	0.653965	1.09352	1.03376	0.745993	0.813487	1.11508	0.936365	1.15226	1.07416	0.934244	0.998037	1.52364	1.10145	3.22249	2.5653	2.29049	2.57295	2.51292	1.86906
Dnah11	0.000740344	0	0.000606856	0	0.000249514	0.000295801	0.005744	0.00729443	0.00350405	0.0120422	0.00671035	0.00821009	0.0101421	0.0122699	0.00380319	0.01145	0.00791358	0.0152585	0.0148744	0.0123876	0.0140215	0.0318615	0.0186274	0.0161887
G3bp1	1.81891	1.56616	1.53252	1.63857	1.50634	1.55884	2.09146	2.02428	1.47856	2.24808	1.79536	1.70965	1.9406	1.84786	1.0896	2.14548	1.54125	1.52563	1.36983	1.16823	0.955343	1.47791	0.889687	0.848691
Atox1	3.52521	3.32706	1.9353	4.6585	3.74809	2.38759	1.74336	1.53026	0.945347	1.90162	2.27019	1.10921	3.40166	4.63924	1.59367	3.15187	3.0764	2.21371	4.29824	4.54289	2.68293	4.51898	3.78787	2.15764
Glra2	0.00119821	0	0	0.000953568	0.00242295	0.000957478	0.00154939	0.000908127	0.0015123	0.00272855	0.00159711	0.00531504	0.00943828	0.0109853	0.00259169	0.0155423	0.0200769	0.0112644	0.00267482	0.00186499	0	0.00446636	0.00197688	0.00314407
Sparc	349.843	279.542	316.374	341.316	337.558	316.528	4.78141	6.17711	6.04286	8.36798	9.23875	11.2406	9.88231	8.81909	6.98384	10.125	14.9437	13.3939	113.258	142.378	132.44	100.109	142.398	112.606
Glra4	0.00528988	0.0259116	0.0346887	0.00420984	0.0142626	0.0507252	0.0300973	0.05212	0.0433976	0.0378592	0.0225631	0.0301693	0.0289867	0.0298452	0.0543489	0	0.021395	0.00382543	0.0236177	0.0288177	0.00400745	0	0.0261827	0.0092537
Mief2	1.25295	1.16902	1.19821	0.914041	1.42518	1.08466	1.43116	1.44421	0.477713	1.20582	1.51699	0.744359	2.78921	2.37477	0.748101	2.05759	1.38755	1.3025	3.2632	1.72674	2.63007	1.82217	2.43327	1.66669
Tbx3	0.0253677	0.0355027	0	0.0134589	0.0227988	0.0270282	0.0131211	0.0128175	0.00533625	0.0275082	0.00901681	0	0.0347516	0.0178904	0.00457248	0.00843721	0.0879428	0.0550348	0.245395	0.125034	0.14093	0.0458468	0.167413	0.0739604
Mmp20	0	0	0	0	0	0	0	0	0.00160437	0	0	0	0	0	0	0	0	0	0	0	0	0	0	0
Mmp7	0	0	0	0	0	0	0	0	0	0	0	0	0	0	0	0	0	0	0	0	0	0	0	0
Crhr1	0.00557081	0.00389824	0.00456637	0.00221671	0.00751001	0	0.0129664	0.029555	0.0087889	0.0362452	0.0356421	0.00176508	0.133552	0.159115	0.0180743	0.177872	0.140015	0.0644575	0.003109	0.0151741	0.00633041	0.0207654	0.0137866	0.00730885
Dusp14	0.022403	0.00391918	0.0229545	0.0267434	0.0377518	0.0223775	0.185402	0.135835	0.106033	0.123896	0.250835	0.0993757	0.460352	0.414737	0.205942	0.536483	0.527474	0.202512	0.481358	0.296394	0.36065	0.455497	0.383479	0.23514
Tada2a	0.307203	0.198559	0.319091	0.212755	0.246587	0.314819	0.480329	0.454998	0.451367	0.443997	0.433857	0.459187	0.586287	0.466382	0.361402	0.479675	0.382095	0.391743	0.358597	0.295655	0.230951	0.365545	0.236011	0.1805
Ikzf1	8.31446	8.7239	8.86845	8.68124	8.35688	8.42951	0.0496405	0.0573708	0.0912742	0.0844291	0.0706281	0.135339	0.0398126	0.0295521	0.0190043	0.0620419	0.0437365	0.0928639	0.0286665	0.00946774	0.0235526	0.0293155	0.0223016	0.0141876
Tcaf3	0	0	0	0	0	0	0	0.0140457	0.00584757	0	0	0	0	0.0130698	0.00501061	0	0	0.0134018	0	0	0	0	0	0
Pnpo	3.7809	3.44215	3.00432	3.33134	3.54972	3.26793	0.55875	0.423987	0.194776	0.61499	0.606813	0.611204	0.792783	0.612196	0.18776	0.596678	1.10342	0.59985	0.452159	0.46539	0.365344	0.732128	0.572876	0.320577
Cog1	1.96695	1.8321	2.20602	1.76632	2.70092	2.12933	1.34734	1.15333	0.993863	1.57375	1.52347	1.08642	2.20753	2.39007	1.40139	2.33391	2.19233	1.97986	1.60209	1.75831	1.96834	2.03563	2.0447	1.36587
Cbx1	2.619	2.40805	2.13679	2.33148	2.3442	1.757	1.19398	1.41255	0.976285	1.58907	1.7146	1.35086	1.67292	2.10046	0.767386	1.52538	1.57657	1.04388	1.67238	2.11406	1.5042	1.84103	1.53244	1.07079
Cdk5rap3	6.00135	4.91471	5.80002	5.23489	5.38772	5.50765	4.18175	3.42624	2.39805	3.9899	4.01712	3.1055	4.67611	4.00138	2.89091	3.97462	3.77791	3.08913	6.09891	4.58893	5.59867	5.79904	4.60481	3.49561
Copz2	0.943818	1.27687	1.00574	0.867959	1.31477	0.988837	0.0759388	0.151013	0.0595614	0.0409383	0.212467	0.146199	0.107746	0.0887494	0.0340242	0.104637	0.157539	0.106172	1.28757	1.44456	1.04868	1.20824	1.41876	0.816348
Slc25a39	5.77349	5.74997	3.37755	7.68328	7.37955	4.11583	6.22035	6.04618	3.3411	7.35692	8.34061	5.51068	9.48446	10.2215	4.67649	8.89208	8.83101	7.13762	11.7119	8.07282	7.96724	10.5859	10.6519	5.25938
Sp2	1.28807	1.15125	1.26962	1.60948	1.60933	1.56798	1.15813	1.13742	0.995185	1.48814	1.37137	1.16969	1.68484	1.24799	1.33445	1.4654	1.32385	1.65984	1.09284	1.07114	1.58682	1.48486	1.43	1.26351
Aatf	0.593799	0.477891	0.689809	0.568536	0.573427	0.629525	0.570878	0.536476	0.400371	0.602967	0.501798	0.578133	0.432765	0.308764	0.276438	0.418534	0.281743	0.364953	0.251653	0.188725	0.194634	0.278953	0.155712	0.143315
Lhx1	0	0	0	0.0521763	0.0662882	0.0392926	0.00847779	0.0124225	0	0.0106641	0.0174778	0.0103865	0.0673608	0.0693557	0.0443154	0.0163543	0.113643	0.0592649	0	0.0127558	0.0124169	0.0111084	0	0.0573446
Dync1h1	12.7117	12.3466	14.3913	12.388	13.9075	13.348	24.9642	21.7964	22.3538	20.4374	17.4734	18.3518	15.5657	13.247	18.0563	13.8298	13.0002	14.451	5.12649	5.17307	6.27015	7.05078	5.30527	4.99337
Cpsf4l	0.0301007	0.0772322	0.0740202	0.0319401	0.114973	0.064142	0.0726564	0.121672	0.0253275	0.0261125	0.0641948	0.0508654	0.0893434	0.0778371	0.0651071	0.0700798	0.0869591	0.00725589	0.0895938	0.0468514	0.0532078	0.0884012	0.190371	0
Pex12	1.21182	1.35049	1.65553	1.23824	1.43196	1.96062	1.43157	1.5194	1.09518	1.80076	1.71496	1.28934	1.71132	1.64594	1.33483	1.94059	1.8239	1.61203	1.88696	1.95603	2.67476	1.673	2.45597	1.43941
Ndel1	0.362973	0.418926	0.448223	0.369522	0.403533	0.401171	0.319407	0.323331	0.246909	0.269897	0.314164	0.221051	0.269608	0.347407	0.15804	0.329246	0.405824	0.27101	0.252556	0.357688	0.319616	0.26357	0.26443	0.160801
Slc25a35	0.915093	1.38742	0.937621	1.28962	0.938078	0.685541	3.03714	3.27993	3.06789	2.9025	2.94771	2.06584	2.72919	2.16465	2.35045	2.43485	3.17237	1.75091	3.42596	3.94658	4.41944	3.60485	3.9789	3.21826
Zbtb4	3.38609	3.69653	3.48021	3.30577	3.84379	3.69687	1.49006	1.87501	1.98363	1.6822	2.11324	1.48039	3.034	3.27195	2.62231	2.35716	2.67683	2.5436	2.22666	2.96715	3.27609	2.60618	3.51868	2.41641
Tnfsfm13	0.0175797	0.0184524	0.02882	0.00699523	0.0236992	0.0210717	0.0227322	0.0133238	0.022188	0.0114379	0.00468646	0.00557005	0.0361241	0.0495918	0.0142592	0.0350817	0.0406294	0.012713	0	0.00684065	0.00665892	0.00595719	0.00725104	0.0230644
Mpdu1	2.87873	3.80503	2.81851	3.80239	3.32834	3.22691	3.65009	3.03029	2.30869	4.21421	3.48538	3.83847	6.69593	6.92243	3.02683	6.56257	6.29511	5.85503	7.22963	7.5612	7.54206	6.23241	6.99235	5.21068
Fxr2	0.526729	0.52421	0.570879	0.516997	0.619351	0.453642	0.886957	0.971413	0.709124	0.712064	0.748892	0.775118	0.729591	0.767708	0.547498	0.706593	0.852145	0.537506	0.862286	0.587558	0.483274	0.777428	0.811096	0.353211
Atp5g3	27.6169	28.0491	19.3552	32.0641	26.2393	22.5963	64.9955	54.5958	34.2832	64.6752	71.8613	56.2686	98.173	95.0249	46.4306	79.7843	73.1766	66.5716	190.988	167.958	109.644	139.384	131.21	92.5055
Cd68	349.927	430.872	339.61	433.276	533.263	413.365	2.59832	2.22867	5.21914	4.70331	5.29136	8.15239	2.97928	2.41944	1.75572	3.36195	3.25645	6.02508	3.07705	1.90706	2.69178	2.69874	2.32469	2.30408
Slc35g3	0	0.0800433	0.0468811	0.0455161	0.0385511	0.0457027	0.0295825	0.173388	0	0.0372115	0.121974	0.0362428	0.195875	0	0.0309269	0	0.165228	0.28952	0.319189	0.133531	0	0.116286	0.141542	0.100049
Acsl1	1.42769	1.25488	1.8146	1.21185	1.22356	1.70471	4.59904	4.89904	4.73443	1.73291	2.69197	3.21226	1.42993	1.52255	3.31641	0.536254	1.12909	1.14878	0.146909	0.150801	0.168953	0.105308	0.0934962	0.0991323
Abca5	0.0191278	0.0133849	0.0242311	0.0221417	0.0164093	0.0194534	0.518964	0.502124	0.576112	0.589443	0.452433	0.565282	0.456177	0.45865	0.473907	0.532658	0.416953	0.596053	0.312485	0.23547	0.405736	0.37005	0.289762	0.479095
Smyd4	0.197139	0.172801	0.192211	0.165146	0.195825	0.222203	0.116994	0.125821	0.0942881	0.106662	0.0995758	0.11309	0.116554	0.16391	0.125678	0.134586	0.110307	0.129057	0.0694868	0.0726736	0.0880356	0.154704	0.0650504	0.130683
Lsp1	3.23832	2.58349	3.19505	3.94348	2.47916	3.67523	0.0342938	0.0132238	0.0176172	0.0272449	0.042792	0.0464374	0.0286825	0.0295319	0.0207566	0.0313367	0.0504057	0.0403763	0.175274	0.152081	0.192982	0.205755	0.0949957	0.155662
[truncated: 52,397 more rows]
