# Supplementary material for: Oligodendrocyte-lineage cell exocytosis and L-type prostaglandin D synthase promote oligodendrocyte development and myelination
Source: eLife. 2023 Feb 13;12:e77441. doi: 10.7554/eLife.77441 (PMC9946447; doi:10.7554/eLife.77441)
Supplement: Supplementary file 2. — Genes with adjusted P-values <0.05 are shown. We used DESeq2 to determine differential gene expression. [file elife-77441-supp2.xlsx]

## Sheet: Oligodendrocyte
gene	log2FoldChange	padj	olig_ctrl_1	olig_ctrl_2	olig_ctrl_3	olig_pdibot_1	olig_pdibot_2	olig_pdibot_3	ctrl_average	pdibot_average
Ptgds	2.8852	3.14e-08	3.81325	4.66977	3.8658	17.7731	65.1696	34.2371	4.11627	39.0599
Fcho1	1.47423	9.11e-07	0.340548	0.2547	0.233715	0.91029	0.965349	0.717097	0.276321	0.864245
Pycr1	1.4464	1.05e-10	2.44913	2.25831	1.47079	5.31691	8.59608	5.18785	2.05941	6.36695
Adam5	1.39023	0.0435502	0.0157985	0.00925977	0.00693911	0.0453098	0.0208448	0.0278718	0.0106658	0.0313421
Jhy	1.35202	0.0276033	0.0204112	0.0117033	0.0238205	0.0357219	0.0384206	0.0989396	0.018645	0.057694
Spin2c	1.14786	0.029285	1.88865	0.98199	0.37166	4.32993	2.10381	1.26889	1.08077	2.56754
Mt2	1.03752	0.0146376	4.76004	2.49102	4.31422	7.61281	7.9207	10.997	3.85509	8.84349
Tafa1	1.00129	0.00985014	0.0081354	0.00894057	0.00468718	0.0211775	0.0161895	0.0113513	0.00725439	0.0162395
Dmtn	0.935999	0.00593531	0.178488	0.217517	0.0970258	0.300099	0.495485	0.257645	0.164344	0.351077
Adgre1	0.931511	0.0129486	0.0216667	0.0259758	0.0540716	0.0495534	0.0527895	0.116435	0.0339047	0.0729261
Plaat1	0.891914	0.022289	0.339285	0.341522	0.133185	0.645741	0.477462	0.484348	0.27133	0.53585
S100a13	0.886292	1.11e-05	5.04697	4.11935	1.885	8.94739	7.60063	5.29252	3.68378	7.28018
Dusp9	0.883113	0.0204465	2.38684	2.22164	0.677665	5.04174	2.69246	2.53801	1.76205	3.42407
Dll1	0.882374	0.00396427	1.41442	1.14511	0.417635	2.51036	1.90403	1.34515	0.992388	1.91985
Rgcc	0.867317	3.94e-06	3.92996	3.45933	1.07651	7.09723	6.81393	2.67617	2.82194	5.52911
Ogdhl	0.853932	0.0411001	0.228181	0.182688	0.103323	0.313658	0.436469	0.273791	0.171397	0.341306
2021-09-06	0.852685	0.017614	0.0901445	0.0828351	0.0326221	0.186424	0.137019	0.082362	0.0685339	0.135268
S100a6	0.849047	6.72e-05	6.46878	5.54849	2.60203	10.1217	10.0104	7.81187	4.8731	9.31465
Sapcd2	0.835831	0.00352684	5.26877	3.80664	1.06926	9.40978	5.15141	3.83465	3.38156	6.13195
Col4a3	0.834273	0.0149308	0.0404849	0.0373264	0.0455096	0.0892628	0.0708032	0.0880536	0.041107	0.0827065
S100a1	0.826901	1.04e-07	34.4341	31.1159	14.9868	64.7757	61.5918	32.1615	26.8456	52.843
Lgalsl	0.819047	0.000680102	3.34483	2.56498	1.2333	5.87178	4.30344	3.37296	2.38104	4.51606
Cav1	0.817944	3.65e-05	1.76801	1.59543	0.796633	3.26108	2.52257	2.16178	1.38669	2.64847
Bmerb1	0.807203	3.21e-07	0.860858	0.860802	0.524829	1.64348	1.54587	1.17463	0.74883	1.45466
Tmem255a	0.802359	0.000100095	1.21699	1.11413	0.392015	2.59385	1.56639	1.00163	0.907713	1.72063
Gsdme	0.785673	0.0119263	0.156604	0.19463	0.0820295	0.402233	0.242563	0.187844	0.144421	0.277547
Scrg1	0.783245	1.01e-06	6.15519	5.44311	4.0163	10.534	10.2733	9.0777	5.20487	9.96167
Prkcg	0.773234	0.00231692	0.388602	0.408261	0.363197	0.619785	1.00823	0.657548	0.386687	0.761853
Plpp4	0.771456	0.0376721	0.138607	0.138752	0.0212086	0.241677	0.154664	0.0891101	0.0995225	0.161817
Pxdc1	0.769317	0.000254761	1.80928	1.55908	0.526282	2.91795	2.77157	1.33291	1.29821	2.34081
Adhfe1	0.73721	0.0175456	0.296796	0.346814	0.190224	0.6049	0.474395	0.455673	0.277945	0.511656
Pmel	0.726503	0.0448626	0.532611	0.477242	0.19635	1.00736	0.683304	0.483525	0.402068	0.724729
Asic2	0.725989	0.0314466	0.0105063	0.00753188	0.00337691	0.0174079	0.0117032	0.00885796	0.00713836	0.0126564
Plppr1	0.720528	0.00519657	0.074602	0.0564201	0.0242898	0.144202	0.0825373	0.0557502	0.0517706	0.094163
Brinp3	0.719748	0.000656738	0.237168	0.206347	0.0884827	0.458592	0.268562	0.225913	0.177333	0.317689
Tafa2	0.71936	0.0328471	0.0238311	0.0171767	0.00832981	0.0350001	0.0317354	0.0203587	0.0164459	0.0290314
Plppr4	0.717857	0.00681371	0.33581	0.323725	0.176105	0.66882	0.534411	0.339238	0.278547	0.514156
Mycl	0.707311	0.000507024	23.9125	19.9845	12.1398	38.7703	28.6179	32.7019	18.6789	33.3634
Vxn	0.689998	0.000141029	15.9226	14.7383	7.98461	30.2102	19.9788	18.6424	12.8818	22.9438
Fam163a	0.684184	0.000601109	0.331988	0.331518	0.144702	0.543424	0.550877	0.3192	0.269403	0.471167
Pianp	0.681011	0.00232006	4.90666	5.45911	1.51127	8.40653	8.30424	3.51741	3.95901	6.74273
Ehd3	0.677941	0.000137175	8.41399	7.61581	5.07249	14.9092	10.8125	11.8167	7.0341	12.5128
Camsap3	0.674811	0.0416892	0.406392	0.409396	0.247914	0.844894	0.721452	0.383789	0.354567	0.650045
Brinp1	0.671757	0.000123615	0.514069	0.437107	0.195587	0.885173	0.683647	0.422475	0.382254	0.663765
Sh3bp4	0.653013	0.000924617	3.32876	3.05596	1.48047	6.09448	3.88938	3.53641	2.62173	4.50676
Jpt1	0.651922	0.0193471	1.08264	1.03115	0.32142	1.75678	1.53634	0.769308	0.811739	1.35414
Bend7	0.649641	0.0268713	0.121033	0.141025	0.100522	0.211861	0.206682	0.217065	0.12086	0.211869
Eogt	0.648939	0.0141636	0.521193	0.508367	0.220264	0.864922	0.720101	0.528907	0.416608	0.704643
Clu	0.645583	0.000891404	8.78514	7.99811	2.69255	14.9987	11.0735	6.30679	6.49193	10.793
Timp4	0.619116	0.00117952	15.6647	13.6951	7.1052	25.4028	18.9059	16.5187	12.155	20.2758
Mrgbp	0.617846	0.00833931	5.02845	4.34163	3.21004	7.79442	6.69141	6.98901	4.19337	7.15828
Adgra1	0.615818	0.0131778	0.463346	0.377416	0.259602	0.773009	0.694058	0.433895	0.366788	0.633654
Mettl22	0.615088	0.0316685	0.744615	0.597605	0.452358	1.13874	0.91405	1.00311	0.598193	1.01863
Snx22	0.613651	0.00916742	5.95375	5.65077	2.74052	9.73591	8.24325	5.96798	4.78168	7.98238
Fam8a1	0.613091	0.00483177	2.54274	2.60705	2.61897	4.19519	4.26942	4.95965	2.58959	4.47475
Gpc5	0.611709	0.0145639	0.0309729	0.0289782	0.0124569	0.0601137	0.0330765	0.0288539	0.024136	0.0406814
2021-09-05	0.610647	0.0114811	2.19823	2.33479	1.35687	4.1477	4.02236	2.09556	1.9633	3.42187
Ppp1r18	0.609495	0.00647155	3.6811	3.41283	1.61204	5.7513	5.02339	3.61392	2.90199	4.7962
Wdr83os	0.607167	0.0159295	12.3406	11.4918	8.81813	19.6336	22.7863	14.0828	10.8835	18.8342
Tmem131l	0.606081	0.0474666	0.0927349	0.0632019	0.0489411	0.143236	0.113375	0.089834	0.0682926	0.115482
Atp1a2	0.602639	0.00159895	7.31465	6.08705	2.35917	12.2847	8.07608	5.33232	5.25362	8.56435
Sowahc	0.602605	0.00948305	10.6044	11.1162	5.94183	20.397	13.1652	13.0759	9.2208	15.546
Cyp2j9	0.598877	0.00694239	1.62517	1.52921	0.84562	2.43845	2.2829	1.89672	1.33333	2.20603
Mtss2	0.597816	0.000315416	12.6283	13.2373	5.13458	22.5022	18.7006	10.1266	10.3334	17.1098
Tspoap1	0.591783	0.0201778	0.796646	0.823156	0.392923	1.50162	1.39775	0.587383	0.670908	1.16225
Phf24	0.586868	0.0489859	0.382945	0.564333	0.309701	0.652362	0.746619	0.672912	0.418993	0.690631
Nenf	0.586853	0.0449579	1.3421	1.24786	0.59843	2.03399	1.8668	1.30749	1.0628	1.73609
Susd5	0.586693	0.00833539	1.84323	1.90599	0.753833	2.87638	2.45308	1.84171	1.50102	2.39039
Adgrb3	0.5825	0.0118285	0.0795997	0.0673587	0.0356196	0.133909	0.0818017	0.084281	0.0608593	0.0999973
Zfp469	0.579028	0.0372819	1.51162	1.16848	0.465081	2.32583	1.7027	1.01991	1.04839	1.68281
Ust	0.577494	0.0030824	0.686618	0.713561	0.4394	0.985808	1.01524	1.02489	0.613193	1.00865
Bmp4	0.577231	0.0019592	54.3355	60.025	32.2077	94.5343	76.0139	69.4447	48.8561	79.9977
Epb41l2	0.575203	0.000437972	8.87238	9.33153	7.97465	14.7655	12.9792	16.2906	8.72618	14.6785
Rnaseh2b	0.573016	0.0077038	0.357811	0.37642	0.320888	0.628968	0.524087	0.616341	0.351706	0.589799
Mad2l2	0.561934	0.0245704	1.8504	1.44685	0.876603	2.5447	2.30458	1.86868	1.39128	2.23932
Prr36	0.561876	0.00914481	5.5291	5.24567	1.7149	9.11379	7.34836	3.4726	4.16323	6.64492
Sowaha	0.56137	0.0111969	11.6268	10.8791	7.09277	23.9018	14.4846	11.8229	9.86623	16.7364
Asb18	0.561304	0.0474666	0.241327	0.204062	0.151291	0.371954	0.296937	0.31202	0.198893	0.32697
Pter	0.559053	0.0199847	0.261638	0.28016	0.256885	0.504378	0.437257	0.388825	0.266227	0.443487
H2az2	0.558769	0.0393226	1.56056	1.21921	0.710187	1.93606	2.09452	1.54878	1.16332	1.85979
Minar2	0.5529	0.0204465	2.37718	2.38136	0.744199	4.10434	3.06622	1.54065	1.83425	2.90374
Afap1l2	0.550621	0.00723735	1.28758	1.1773	0.613358	2.06326	1.48455	1.37008	1.02608	1.6393
Tmem108	0.540956	0.00111062	0.672055	0.659844	0.526021	1.04971	0.964492	1.0151	0.619307	1.00977
Epcam	0.537731	0.0325063	2.96204	2.84198	2.04458	4.94067	3.1871	4.77725	2.6162	4.30168
Camsap2	0.5372	0.00271417	5.57801	5.68421	5.1494	10.4286	7.17669	9.5226	5.47054	9.04263
Ndrg2	0.535755	0.00400961	21.2356	19.9469	7.0891	33.2812	26.6454	14.8473	16.0905	24.9246
Lims2	0.529228	0.00108591	4.89357	5.04812	2.58681	8.23722	7.82455	4.25601	4.17617	6.7726
Fyn	0.514508	0.00423342	6.97565	6.74811	4.90552	10.7529	8.75813	10.2239	6.20976	9.91166
Nrep	0.510375	0.0178642	1.42472	1.36063	0.61367	2.31318	1.95188	1.09302	1.13301	1.78603
Inava	0.504449	0.0245396	2.06065	2.19834	1.05268	3.52073	2.7323	2.0342	1.77056	2.76241
Epb41	0.49551	0.0233987	0.72112	0.691984	0.319935	1.1672	0.805481	0.683677	0.57768	0.885454
Lrrc42	0.494275	0.0239949	3.56834	3.64477	2.13935	4.54266	5.39706	4.55984	3.11749	4.83319
Dynll2	0.492611	0.00666863	19.191	18.1095	11.0516	26.9404	26.4683	21.5085	16.1174	24.9724
Bex3	0.492153	0.012975	56.0914	46.5781	23.8264	76.0256	69.794	47.0212	42.1653	64.2803
Nkx2-2	0.488832	0.0124236	3.52702	3.95971	1.50927	5.70552	5.499	2.66573	2.99867	4.62342
Sulf2	0.479927	0.00942752	18.6545	17.2386	10.1519	27.7064	21.8972	20.8871	15.3483	23.4969
Plppr5	0.479704	0.0365806	0.302817	0.297427	0.145289	0.486446	0.34748	0.302101	0.248511	0.378675
Asic1	0.479173	0.0154879	3.98266	3.05112	1.36778	5.92975	3.98996	2.74202	2.80052	4.22058
Tmem94	0.476495	0.0344886	1.06521	0.905186	0.565828	1.54957	1.49763	0.905535	0.845408	1.31758
Syngap1	0.471917	0.0292739	1.45692	1.88927	0.793763	2.36086	2.39392	1.48543	1.37998	2.08007
Wdr89	0.465015	0.0418569	1.34655	1.27916	0.625955	1.668	2.06657	1.18555	1.08389	1.64004
Ccng1	0.458163	0.0154973	8.27636	9.83512	9.96462	11.9552	14.175	17.7278	9.3587	14.6193
Cyp2j6	0.453752	0.0309013	5.97965	5.77569	4.28143	9.2672	6.60794	8.86939	5.34559	8.24818
Rnd2	0.451258	0.0151392	70.8449	65.1712	47.0972	89.8033	112.069	78.9606	61.0378	93.6108
Map2	0.449924	0.0154891	1.41844	1.51569	1.07573	2.57453	1.85752	1.76145	1.33662	2.0645
Bcas1	0.444238	0.0133523	27.7764	29.0822	21.0818	43.83	35.4368	39.4782	25.9802	39.5817
Neu4	0.436621	0.0478693	44.4648	46.0146	17.9344	59.0609	55.7052	39.7438	36.1379	51.5033
Mfsd2a	0.426907	0.0314419	25.7586	22.0696	11.7225	36.484	27.0115	23.5477	19.8502	29.0144
2021-09-03	0.422872	0.0330152	4.72994	5.04341	2.91308	8.01999	6.02136	4.95616	4.22881	6.3325
Luzp2	0.403395	0.0342471	0.590063	0.63038	0.560534	0.967045	0.739385	0.963766	0.593659	0.890065
Klhl5	0.402773	0.0375498	6.86091	6.81554	5.11103	9.04335	8.81283	9.91684	6.26249	9.25767
Lcorl	0.400186	0.0364657	0.793915	0.920213	1.05746	1.34134	1.11617	1.69417	0.923862	1.3839
Cd9	0.39956	0.020944	11.374	9.9559	5.71984	15.5457	13.8863	9.85771	9.01657	13.0966
Cpped1	0.387656	0.0458386	0.659938	0.581054	0.539147	0.983721	0.809122	0.831313	0.593379	0.874719
4833439L19Rik	0.355411	0.045445	15.8686	15.1804	12.6505	21.2826	22.0267	19.4678	14.5665	20.9257
Ick	-0.348476	0.0425777	9.95343	9.32179	11.8912	8.56647	8.44808	10.5628	10.3888	9.19245
Tmcc1	-0.349391	0.0471468	1.40046	1.45357	1.51396	1.18017	1.25409	1.43971	1.456	1.29132
Myrf	-0.352459	0.0406561	33.9579	38.0094	38.8861	27.3363	34.4652	36.5965	36.9511	32.7993
Ptk2	-0.355583	0.0426729	0.935704	1.01273	1.11241	0.822243	0.859966	1.01762	1.02028	0.899942
Arl6ip1	-0.362286	0.0398896	31.3098	28.793	21.2796	25.3277	25.2557	20.1934	27.1275	23.5922
Slc22a23	-0.368323	0.0240882	6.60622	6.27289	5.95404	5.63231	5.27004	5.5256	6.27772	5.47598
Kcna2	-0.369933	0.0449021	14.1539	14.9421	19.1467	13.1284	13.0901	15.6179	16.0809	13.9455
Unc5c	-0.370218	0.034535	0.575803	0.554522	0.543679	0.514098	0.451965	0.494604	0.558002	0.486889
Ubr4	-0.370776	0.0391463	2.50685	2.44885	2.2115	2.1869	2.24034	1.83197	2.38906	2.0864
Ptch1	-0.371497	0.0485037	1.74613	1.80233	1.40419	1.48562	1.47953	1.3281	1.65088	1.43108
Sec62	-0.376565	0.0485037	3.43439	3.55059	4.08981	3.15426	2.92855	3.52845	3.6916	3.20375
Npc1	-0.378861	0.025565	8.70733	8.82471	9.13828	7.96135	7.2607	7.89921	8.8901	7.70709
Abhd17b	-0.383305	0.0424361	3.87944	4.00526	5.42655	3.30966	3.65916	4.49063	4.43708	3.81982
Sorbs3	-0.384119	0.0394344	9.40585	10.016	9.69842	6.91051	8.98589	9.45917	9.70675	8.45186
Ado	-0.384733	0.046334	63.8736	62.778	61.7355	46.7653	60.4734	56.2241	62.7957	54.4876
Myo9b	-0.387293	0.033348	1.68143	1.64696	1.47106	1.35673	1.38254	1.38816	1.59982	1.37581
Phc1	-0.388155	0.0320489	12.4399	13.5133	13.2098	9.34478	11.9015	12.7302	13.0543	11.3255
Abcc5	-0.389226	0.0467963	1.35175	1.55539	1.41261	1.32466	1.26877	1.12386	1.43992	1.23909
Appbp2	-0.389661	0.0367029	4.02984	4.13043	4.65818	3.73479	3.59003	3.67689	4.27282	3.66724
Picalm	-0.390746	0.0215393	3.41949	3.54017	4.42337	2.85889	3.07116	3.87002	3.79434	3.26669
Spns2	-0.391099	0.0491137	2.01931	2.42454	2.20891	1.59234	1.96062	2.19447	2.21759	1.91581
Degs1	-0.39314	0.0365806	48.5783	47.6123	46.449	35.6278	45.0372	42.2616	47.5465	40.9755
Cpm	-0.393417	0.0340397	2.01572	1.92756	2.59934	1.6026	1.69444	2.34717	2.18087	1.8814
Rbl2	-0.39403	0.0409985	1.4869	1.55409	1.65516	1.22054	1.28293	1.53882	1.56538	1.34743
mt-Nd6	-0.394909	0.0383323	708.832	631.744	351.259	721.606	463.988	294.998	563.945	493.531
Prepl	-0.395141	0.040567	3.24687	3.62037	3.5552	2.69777	3.19302	3.04952	3.47415	2.9801
Ldah	-0.396055	0.0449021	1.7139	1.7481	1.74241	1.31146	1.67529	1.49069	1.7348	1.49248
Kif21a	-0.396574	0.0198913	1.89414	2.0984	2.65298	1.55881	1.70156	2.49101	2.21518	1.91713
Cmip	-0.398637	0.034602	1.19867	1.05046	1.34202	0.978196	1.00356	1.07517	1.19705	1.01898
Usp22	-0.398902	0.0295139	21.5801	17.7131	17.8558	15.8306	16.4745	16.328	19.0497	16.211
Cds2	-0.400825	0.0284428	3.67688	3.89942	3.69008	3.51351	2.97508	3.14329	3.75546	3.21062
Mgll	-0.401914	0.0340397	2.15143	2.09703	1.89905	1.5696	1.94154	1.74247	2.04917	1.75121
Abl1	-0.402574	0.0356788	1.82373	1.79527	1.81334	1.33692	1.6994	1.6174	1.81078	1.55124
Aplp2	-0.402828	0.0201778	6.24618	5.60493	5.51382	5.33571	4.96275	4.50971	5.78831	4.93606
Trappc10	-0.403525	0.0247368	2.48051	2.22871	2.3815	2.03341	1.89826	2.10791	2.36357	2.01319
Zdhhc24	-0.405144	0.0310787	16.0419	16.7461	13.8098	12.652	14.1158	12.7927	15.5326	13.1868
Gan	-0.405798	0.0390024	1.62441	1.41506	1.66303	1.30297	1.28348	1.40702	1.5675	1.33115
Selenoi	-0.406406	0.0245499	5.21913	4.93938	4.34052	4.42265	3.6258	4.28484	4.83301	4.1111
Bbx	-0.406914	0.033348	0.325065	0.340386	0.448673	0.289956	0.278176	0.3779	0.371374	0.315344
Rap2a	-0.409379	0.0182257	49.0133	47.3592	48.4702	36.2933	39.2404	48.2105	48.2809	41.2481
Pigq	-0.410608	0.0298265	6.90922	6.92288	6.50967	5.38335	6.29036	5.59709	6.78059	5.75693
Arhgef10	-0.411683	0.025899	4.37901	4.64469	5.42575	3.24445	4.4345	4.65913	4.81648	4.1127
Rnf141	-0.411781	0.0336361	3.01742	3.18767	4.26241	2.47126	3.01392	3.34609	3.48917	2.94375
Pdcd6ip	-0.412926	0.0235399	2.59856	2.97727	3.20096	2.31505	2.53732	2.55462	2.9256	2.46899
Trp53bp2	-0.414736	0.0220301	3.83424	3.50932	3.74442	2.90806	3.14092	3.3301	3.69599	3.12636
Prkacb	-0.415226	0.0370423	1.90867	2.11647	2.5571	1.88735	1.75248	1.88336	2.19408	1.84106
Tgoln1	-0.41575	0.0205261	20.9428	20.1955	22.4705	16.5337	18.0231	19.2149	21.2029	17.9239
Capn5	-0.416105	0.0186161	6.16621	6.63713	5.87022	4.5715	5.87234	5.38469	6.22452	5.27618
Mpp5	-0.41791	0.0185098	1.7215	1.94363	2.55539	1.49333	1.65994	2.06971	2.07351	1.74099
Rab6b	-0.418081	0.0227198	4.19163	4.32181	4.39765	3.47018	4.02324	3.41981	4.3037	3.63774
Rb1	-0.418094	0.0424567	0.385314	0.400478	0.546617	0.349776	0.32764	0.441865	0.444136	0.373094
Map6	-0.41978	0.0257863	1.51366	1.56782	1.50131	1.16837	1.2584	1.44703	1.5276	1.29127
Stx16	-0.420923	0.0323506	2.74311	3.40139	3.13263	2.44866	2.59534	2.74121	3.09238	2.59507
Rab33b	-0.42094	0.0401745	4.86807	5.31877	4.96473	4.40892	4.26143	4.07393	5.05053	4.24809
Rdx	-0.421316	0.0219178	4.25312	4.60772	5.4312	3.64064	4.17721	4.1677	4.76401	3.99518
Slc35e2	-0.421688	0.0370903	3.1712	3.18822	3.25675	2.45478	2.82955	2.82027	3.20539	2.70153
Agps	-0.422507	0.0125103	1.89302	2.2089	2.44273	1.63114	1.79159	2.07622	2.18155	1.83298
Gpatch8	-0.422565	0.0167882	3.02562	3.17536	3.45383	2.57601	2.79361	2.73823	3.21827	2.70262
Hadh	-0.422813	0.0443677	2.14698	2.01891	2.04167	1.52524	1.87728	1.83404	2.06918	1.74552
Dicer1	-0.423191	0.0104583	4.43165	3.70907	4.6734	3.65614	2.99608	4.15914	4.27137	3.60378
Fech	-0.423665	0.0284428	2.65074	2.71888	3.5314	2.15593	2.4829	2.81991	2.96701	2.48625
Wdfy2	-0.42415	0.0264667	0.619039	0.654665	0.712876	0.523909	0.544972	0.599066	0.662193	0.555982
Dram2	-0.424626	0.0440925	2.46398	2.70624	3.12638	1.74239	2.51279	2.80961	2.76553	2.35493
Smyd3	-0.424729	0.0402132	0.114891	0.101201	0.121627	0.103268	0.0845127	0.0957903	0.112573	0.0945237
St18	-0.425324	0.0247098	0.279309	0.292611	0.463201	0.223467	0.267394	0.374639	0.34504	0.2885
Plod3	-0.426492	0.0343958	9.12287	9.13943	7.01795	6.64122	7.88369	6.58565	8.42675	7.03685
Sh3gl3	-0.427207	0.0308066	2.48137	2.4161	2.64061	1.64285	2.13228	2.6544	2.51269	2.14318
Tjp1	-0.427568	0.0182643	1.28961	1.36426	1.66992	1.23759	1.08037	1.29154	1.44126	1.20317
App	-0.427884	0.0184687	4.95086	5.05485	5.3275	3.52912	4.00586	5.53784	5.11107	4.35761
Actn4	-0.428075	0.0352255	1.89332	1.78477	2.02124	1.57915	1.70401	1.49008	1.89978	1.59108
Clcn6	-0.433385	0.00916742	7.44884	6.982	5.86128	6.18837	5.59917	5.10771	6.76404	5.63175
Far1	-0.434185	0.0123224	2.35223	2.86732	2.68265	1.95469	2.19726	2.44178	2.63407	2.19791
Parl	-0.434607	0.0352092	2.99341	2.70996	2.34617	2.251	2.30226	2.129	2.68318	2.22742
Ctso	-0.434864	0.0324311	4.22999	4.32753	4.70699	2.91365	3.58802	4.76089	4.4215	3.75419
Pafah1b2	-0.434882	0.0132998	6.56655	6.80025	6.74288	4.83372	6.07067	5.93813	6.70323	5.61417
Mpdz	-0.43532	0.045445	0.379351	0.427037	0.477443	0.360475	0.36134	0.343299	0.427944	0.355038
Ppp1r15b	-0.435427	0.0116878	20.5193	19.7874	15.7641	16.4406	15.7314	14.3129	18.6903	15.495
9330182L06Rik	-0.435721	0.0436752	0.288401	0.296901	0.303541	0.231575	0.204749	0.315974	0.296281	0.250766
Cul1	-0.435776	0.0108068	2.80822	2.75151	3.54585	2.44071	2.24834	2.88553	3.03519	2.52486
Cacfd1	-0.435941	0.0202708	9.66995	8.98897	7.38386	8.34005	7.42473	5.97751	8.68093	7.24743
Cyld	-0.43655	0.0318344	1.41153	1.42042	1.60198	1.36721	1.06038	1.27676	1.47798	1.23479
Ankrd13a	-0.438933	0.0267103	4.28043	3.96614	4.21365	2.94359	3.58207	3.89189	4.1534	3.47252
Dnajc18	-0.440437	0.00942044	6.75174	6.91903	6.68779	5.73035	5.78274	5.39346	6.78619	5.63552
Cc2d1b	-0.442436	0.0467963	2.79558	3.13101	2.80798	2.1808	2.40363	2.67096	2.91152	2.41846
Zfp532	-0.443575	0.0148813	1.40364	1.38241	1.31608	1.15355	1.21315	1.03689	1.36738	1.13453
Tprn	-0.444081	0.0337424	21.5877	19.3488	20.5693	13.918	17.884	19.5769	20.5019	17.1263
Lamp1	-0.444465	0.0119263	87.8254	80.3088	79.3683	63.2247	74.5957	67.3563	82.5009	68.3922
Tacc1	-0.445214	0.0407973	0.566311	0.563213	0.604941	0.514564	0.480664	0.441383	0.578155	0.47887
Golga7	-0.44583	0.01254	17.1543	18.3896	19.7707	12.296	14.6892	19.5225	18.4382	15.5025
Lcor	-0.446968	0.0416892	0.366235	0.447347	0.482205	0.335651	0.326894	0.406648	0.431929	0.356398
Ddrgk1	-0.447126	0.0345505	9.76182	7.61081	5.43983	6.62749	6.88203	5.01192	7.60415	6.17382
Mical3	-0.447835	0.00629843	2.32544	2.49581	2.44619	1.77549	2.11217	2.13287	2.42248	2.00684
Fam234b	-0.447929	0.0142182	4.69634	4.21443	3.72466	3.87632	3.77	2.83917	4.21181	3.49516
Erbin	-0.448899	0.0226888	1.53852	1.5469	2.9233	1.46401	1.29999	2.05889	2.00291	1.60763
Trip12	-0.453124	0.00516885	2.65977	2.6941	3.1213	2.23046	2.16021	2.58706	2.82505	2.32591
Iffo1	-0.453258	0.0108891	9.59195	8.85996	10.6555	7.54043	7.73443	8.65541	9.70246	7.97676
Mat2a	-0.453869	0.0072749	39.4355	38.874	39.0484	30.1569	33.2531	33.216	39.1193	32.2087
Igf2r	-0.456545	0.0204465	0.779167	0.786603	0.801943	0.68058	0.624521	0.639559	0.789237	0.64822
Dst	-0.456746	0.0117656	3.71903	3.69604	5.22506	3.62108	2.88823	3.79839	4.21338	3.4359
Golga4	-0.45682	0.0271794	1.84533	2.08024	2.61341	1.90241	1.57475	1.85289	2.17966	1.77668
Adam22	-0.458953	0.00646706	0.840392	0.869365	0.968039	0.738991	0.684622	0.769654	0.892599	0.731089
Tbc1d32	-0.459747	0.0306418	0.165153	0.194943	0.25887	0.134529	0.148073	0.229736	0.206322	0.170779
Ugp2	-0.461712	0.0236279	1.1972	1.30265	1.206	0.86959	1.067	1.10871	1.23528	1.0151
Ctsl	-0.461728	0.0223003	92.6317	88.859	76.1695	57.9624	73.0243	81.0166	85.8868	70.6678
Atp2c1	-0.463839	0.00740691	1.37913	1.42994	1.54874	1.19193	1.14875	1.21566	1.4526	1.18545
Gnao1	-0.46488	0.00556368	3.0277	3.27311	3.02362	2.25445	2.8606	2.52645	3.10814	2.54717
Timm17a	-0.464886	0.0211221	4.84098	4.57048	3.19557	3.38208	3.87054	2.94111	4.20234	3.39791
Dusp16	-0.464964	0.0287233	0.834962	0.682946	0.742651	0.579263	0.574879	0.692051	0.75352	0.615398
Frmd4b	-0.465	0.0200732	0.52331	0.42467	0.597651	0.346321	0.39954	0.522014	0.51521	0.422625
Osbp	-0.465499	0.0120152	3.50885	3.55236	3.77521	2.91779	2.97585	2.94342	3.61214	2.94569
Prnp	-0.466095	0.011437	4.12822	4.41195	4.08149	3.62468	3.57058	3.11281	4.20722	3.43602
Lnpep	-0.467573	0.0200272	0.615674	0.695294	0.932808	0.525253	0.596728	0.690341	0.747925	0.604107
Tbcel	-0.467773	0.0187345	0.668844	0.637648	0.714721	0.503665	0.536823	0.609643	0.673738	0.550044
Fkbp1a	-0.468171	0.0188808	29.9506	29.0966	23.9891	19.6887	28.7387	19.9563	27.6788	22.7946
Snx13	-0.468365	0.00633918	1.34477	1.47112	1.69007	1.08633	1.09113	1.52213	1.50199	1.2332
Cdh10	-0.468965	0.0123736	0.453279	0.422497	0.409015	0.363882	0.350753	0.330885	0.428263	0.348507
Dync1h1	-0.469323	0.00232006	24.9642	21.7964	22.3538	20.4374	17.4734	18.3518	23.0382	18.7542
Slc26a11	-0.469409	0.0400273	1.18744	1.43643	1.40175	1.00891	1.08746	1.17445	1.34188	1.09027
Git1	-0.469435	0.0390501	5.82139	6.16165	7.08143	4.0609	6.4016	5.26299	6.35482	5.24183
Rab3gap1	-0.470564	0.0485037	0.37328	0.44141	0.399499	0.315089	0.318959	0.352017	0.40473	0.328688
Fam53c	-0.470664	0.0477996	4.34537	4.19632	4.05452	3.73249	4.03127	2.62636	4.19873	3.46337
Zer1	-0.470782	0.0212714	3.13194	3.16395	3.26354	2.27428	2.96381	2.57644	3.18648	2.60484
Dlg1	-0.471432	0.0119671	0.911549	0.865069	1.17983	0.654224	0.808811	0.943871	0.985482	0.802302
Nde1	-0.472484	0.028749	2.70534	2.56985	2.54699	1.73672	2.17323	2.50678	2.6074	2.13891
Spop	-0.472966	0.00554074	2.13417	2.05413	2.62276	1.74486	1.68946	2.08679	2.27035	1.84037
Sppl2b	-0.4737	0.0398832	5.64249	4.6067	3.66825	3.51715	4.02846	3.5994	4.63915	3.715
Hid1	-0.473871	0.0255267	5.51287	6.27189	6.55777	3.556	6.09036	5.57454	6.11418	5.07363
Cd47	-0.474345	0.00373216	4.35388	4.16633	5.81522	3.56242	3.49439	4.51966	4.77847	3.85882
Atp6ap2	-0.474549	0.0312671	1.44812	1.34891	1.37191	1.23465	1.07891	1.07119	1.38965	1.12825
Bach2	-0.474969	0.0206013	0.146024	0.139015	0.171466	0.115776	0.115673	0.138567	0.152168	0.123338
Pdia6	-0.475009	0.0208842	13.6605	13.3	5.8725	9.39363	9.33187	6.51676	10.9444	8.41409
Klhl20	-0.475062	0.0292035	1.00611	1.1819	1.16841	0.90347	0.943081	0.867729	1.11881	0.90476
Sptlc1	-0.475232	0.0131778	2.13128	1.91049	1.86289	1.55001	1.65052	1.57882	1.96822	1.59312
1600012H06Rik	-0.475251	0.0283966	3.02748	3.05088	3.32758	2.10939	2.68374	2.88638	3.13531	2.55984
Reep3	-0.475347	0.00972194	3.39459	3.7013	5.01767	3.20472	2.92726	3.577	4.03785	3.23632
Col20a1	-0.475406	0.0280965	1.61658	1.48012	1.85924	1.29977	1.31995	1.38188	1.65198	1.33387
Glul	-0.47638	0.0323943	13.1192	15.8615	26.161	10.7381	16.0569	16.7892	18.3806	14.5281
Mta3	-0.477089	0.0122991	0.843592	0.851925	0.951873	0.641514	0.759159	0.744945	0.882464	0.715206
Syt11	-0.47745	0.00286815	48.6166	50.1026	54.9631	37.5003	42.8899	44.1013	51.2274	41.4972
Mfsd14b	-0.478021	0.028655	0.940308	0.928496	0.653573	0.726648	0.752854	0.551843	0.840792	0.677115
Gna12	-0.478068	0.0163125	3.4388	3.30796	3.81237	2.55522	3.25261	2.76267	3.51971	2.85683
Gnptab	-0.478109	0.00250126	5.64634	5.74024	6.658	4.36308	4.49061	5.82649	6.01486	4.89339
Cdk5	-0.478833	0.0376021	13.0872	12.0748	10.6496	8.47965	11.8249	8.85695	11.9372	9.7205
Nrd1	-0.478939	0.00213279	9.62588	9.61735	9.72576	7.54887	7.66127	8.22226	9.65633	7.8108
Kcnj10	-0.479499	0.00300283	28.5307	27.7473	29.6262	21.9522	23.7792	23.7037	28.6347	23.1451
Atxn2	-0.480146	0.0078298	2.10859	2.38731	2.46352	1.91924	1.90658	1.78477	2.31981	1.8702
Ccnl2	-0.481704	0.018949	10.939	12.442	13.0415	10.0458	10.6976	8.65963	12.1408	9.80101
Pigm	-0.482014	0.0204465	7.03194	6.43991	6.83181	5.32362	5.43637	5.61379	6.76789	5.45793
Foxn3	-0.482047	0.00833052	0.764489	0.737235	1.10121	0.667457	0.630426	0.77429	0.867644	0.690724
Pip4p1	-0.482877	0.0207105	13.6349	14.4105	12.8448	9.25388	12.4931	11.4196	13.6301	11.0555
Ttbk1	-0.483184	0.0139542	2.90733	2.65683	2.60854	2.45174	2.35097	1.82674	2.72423	2.20982
Rnf103	-0.484162	0.00883864	4.47283	4.46479	5.00242	3.61432	3.46913	4.1631	4.64668	3.74885
Mapk3	-0.484362	0.0188281	38.2102	36.4763	37.2954	24.1005	35.4024	31.7941	37.3273	30.4323
Mfn1	-0.484662	0.0116898	2.09708	2.06123	2.42148	1.90774	1.62953	1.7567	2.19326	1.76465
Rtn4	-0.484835	0.00239468	22.5772	27.3676	31.0665	16.5248	21.1021	28.7127	27.0038	22.1132
Atxn1l	-0.485438	0.00983562	7.51524	7.19773	7.64096	6.08302	5.95596	5.94468	7.45131	5.99455
Slc6a6	-0.485963	0.012285	2.43553	2.21427	3.36546	2.08124	1.97751	2.29714	2.67175	2.11863
Arhgef12	-0.486447	0.0110076	1.058	1.04462	1.4331	0.978184	0.840474	1.00209	1.17857	0.940248
Dlg2	-0.487112	0.0265351	0.0569047	0.0648426	0.0832679	0.0524108	0.0582717	0.0521918	0.0683384	0.0542914
Pacs2	-0.488157	0.00248971	17.7655	18.509	18.5896	13.1082	15.7988	15.2931	18.288	14.7334
Tmem165	-0.49099	0.0190556	1.85399	1.81465	1.86283	1.41756	1.4839	1.53505	1.84382	1.47884
Cacna2d1	-0.491967	0.0146856	0.104825	0.109159	0.135569	0.0847413	0.0812565	0.115755	0.116518	0.0939175
Ankib1	-0.495006	0.00446607	1.64398	1.5993	2.23027	1.41812	1.27882	1.65264	1.82452	1.44986
Ubl3	-0.495147	0.0120122	11.1624	10.7502	9.38096	6.85033	9.82447	8.53159	10.4312	8.40213
Pea15a	-0.495991	0.00319501	49.4415	51.2507	47.6162	34.841	43.9899	40.1229	49.4361	39.6513
Nkap	-0.49787	0.0264412	1.57845	1.48552	2.23898	1.30431	1.26991	1.61624	1.76765	1.39682
Phlpp1	-0.499189	0.00858482	1.2861	1.19994	1.43565	0.898723	1.14116	1.09467	1.30723	1.04485
Psd3	-0.500263	0.00883864	0.337605	0.382042	0.533667	0.299724	0.322435	0.360041	0.417772	0.3274
Cdc42bpa	-0.503383	0.0051247	1.25953	1.38627	1.94768	1.11655	1.12657	1.3577	1.53116	1.20027
9530068E07Rik	-0.504505	0.00223859	17.882	16.5944	14.8173	13.7111	13.3274	12.05	16.4312	13.0295
Amph	-0.505199	0.00911824	0.48883	0.471003	0.38108	0.332241	0.398544	0.331394	0.446971	0.35406
Morf4l2	-0.5062	0.00480048	13.3206	13.3336	8.8064	9.38871	10.4116	7.99513	11.8202	9.26514
Acat2	-0.506531	0.0300206	9.05029	8.5248	6.01453	5.05775	6.95862	6.56671	7.86321	6.19436
Cdk19	-0.506651	0.00197161	1.60911	1.56667	2.25283	1.19536	1.2787	1.85287	1.80954	1.44231
Cpeb3	-0.507975	0.0411001	0.129305	0.144267	0.154559	0.106921	0.117049	0.114591	0.14271	0.112854
Pgap1	-0.507982	0.0042754	1.8052	1.98466	2.2379	1.64348	1.41112	1.71897	2.00925	1.59119
Kif5a	-0.509374	0.0236279	3.29142	3.57172	3.464	3.10518	3.11342	2.07824	3.44238	2.76561
Pigc	-0.509444	0.038105	12.037	8.81886	7.62542	8.28034	8.61975	5.61875	9.49375	7.50628
Herc2	-0.510373	0.00351782	1.50936	1.3516	1.60365	1.2761	1.11027	1.1421	1.4882	1.17616
Ncoa3	-0.510878	0.0249057	0.68179	0.822463	0.935116	0.68782	0.60924	0.618526	0.813123	0.638529
Btbd3	-0.511674	0.0161152	0.20212	0.19979	0.24029	0.142693	0.187968	0.17859	0.214067	0.16975
Ddhd2	-0.512767	0.00734521	2.06169	2.29423	2.12823	1.57295	1.78074	1.76888	2.16138	1.70752
Mgat5	-0.513895	0.00467359	0.430905	0.354806	0.4082	0.303493	0.295446	0.342111	0.39797	0.313683
Mtmr4	-0.515725	0.00623021	3.48106	3.51495	2.51039	2.56577	2.86904	2.04037	3.1688	2.49173
Tmc7	-0.517415	0.013922	0.966813	1.02427	1.20259	0.653144	0.802195	1.10439	1.06456	0.853243
Ctr9	-0.517631	0.008495	4.90417	4.29258	5.58966	3.96693	3.83299	3.77304	4.9288	3.85766
Msl1	-0.521572	0.00129581	17.7051	19.7986	17.0018	13.3	14.626	14.8087	18.1685	14.2449
Slc2a1	-0.522801	0.0121475	2.10424	2.55098	2.12151	1.59026	2.28594	1.50512	2.25891	1.79377
Arhgef1	-0.522901	0.0220809	2.31281	2.6853	3.00232	1.85461	2.51515	1.924	2.66681	2.09792
Tpst1	-0.523027	0.00941007	1.57122	1.37849	1.37014	1.02848	1.23374	1.12722	1.43995	1.12981
Nbeal1	-0.523522	0.016605	0.222928	0.276401	0.366139	0.204922	0.185603	0.286011	0.288489	0.225512
Tmem159	-0.524736	0.0373245	3.60148	3.59547	3.06217	1.97888	2.83189	3.38197	3.41971	2.73091
Arl2	-0.525316	0.0385119	8.83442	8.21149	6.70137	4.85036	7.98474	5.99435	7.91576	6.27649
Gfod1	-0.526012	0.0110076	0.484208	0.43662	0.446176	0.342874	0.325185	0.405163	0.455668	0.357741
Exog	-0.526245	0.0285387	2.01084	1.70309	1.50921	1.27786	1.47527	1.31414	1.74104	1.35576
Baz2a	-0.526522	0.00763144	2.51749	2.37091	2.71368	1.98202	2.08106	1.87852	2.53403	1.98054
Pmm1	-0.526579	0.0349205	4.59385	4.37446	3.31403	2.9995	4.32244	2.44601	4.09411	3.25598
Asxl3	-0.526798	0.0108891	0.225092	0.240225	0.262934	0.177119	0.187391	0.204904	0.24275	0.189804
Zfp169	-0.526874	0.0109092	2.32034	2.17474	2.94144	1.93883	1.81227	2.02262	2.47884	1.92457
Tmem19	-0.527825	0.0104262	2.72259	2.60041	2.49379	1.81907	2.19574	2.10824	2.6056	2.04102
Nkd1	-0.529951	0.0379656	0.559297	0.561057	0.616083	0.527913	0.473971	0.36463	0.578812	0.455505
Etnk1	-0.531416	0.000860229	5.01614	5.61466	5.75131	4.22115	4.04225	4.49543	5.4607	4.25294
Nab1	-0.531788	0.0319222	0.558261	0.558494	0.741625	0.449143	0.45861	0.532925	0.61946	0.480226
Rrbp1	-0.531808	0.00114158	2.81337	2.77272	2.83362	2.26645	1.99419	2.31357	2.80657	2.1914
Tmem260	-0.532276	0.0101408	0.531142	0.603023	0.57507	0.394932	0.441244	0.499372	0.569745	0.445183
St8sia3	-0.534966	0.0024763	5.83029	4.96178	5.20065	4.25334	4.16549	3.99349	5.3309	4.13744
Ppfibp2	-0.536602	0.0199424	0.230458	0.260754	0.298779	0.145701	0.223921	0.256319	0.26333	0.208647
Relch	-0.538034	0.00100527	1.74059	1.9025	2.02099	1.2937	1.44035	1.67728	1.88803	1.47044
Prickle2	-0.540397	0.0409862	0.168145	0.160135	0.20694	0.139545	0.162361	0.113897	0.178407	0.138601
Igsf11	-0.540885	0.00516609	2.89518	2.89807	3.19772	1.71339	2.40198	3.02117	2.99699	2.37885
Lap3	-0.541188	0.00774639	6.54599	6.51422	4.7873	3.95495	5.24849	4.56156	5.94917	4.58833
Rhog	-0.541337	0.0112302	8.16922	7.86849	8.24386	5.23847	7.82199	6.00063	8.09386	6.3537
Bin1	-0.542039	0.00291859	5.95529	6.11823	7.79789	4.29535	5.57767	5.49652	6.6238	5.12318
Trnt1	-0.542107	0.00502231	4.92553	4.81607	6.74526	3.54375	4.07601	5.13777	5.49562	4.25251
Arfgef2	-0.542313	0.00265838	0.862944	0.894285	1.00175	0.633899	0.704489	0.801475	0.919661	0.713287
Polr3e	-0.542595	0.00943691	3.30885	2.80044	3.39788	2.19308	2.65944	2.50129	3.16906	2.45127
Add1	-0.542725	0.00256461	12.1427	11.1373	10.8299	7.79928	9.98935	8.69554	11.37	8.82806
Dazap1	-0.543888	0.029531	1.34033	1.53906	1.17842	0.956445	1.4734	0.788877	1.3526	1.07291
Flvcr1	-0.54408	0.022482	1.61316	1.39253	1.57306	1.17258	0.926571	1.49431	1.52625	1.19782
Errfi1	-0.544176	0.0189309	3.90028	3.80803	3.37612	2.37559	3.60143	2.69602	3.69481	2.89101
Tpcn1	-0.544578	0.0218801	0.555868	0.603035	0.51037	0.424071	0.498603	0.37159	0.556424	0.431421
Edem1	-0.544838	0.00272157	2.28158	2.31383	2.80811	1.72198	1.76182	2.25092	2.46784	1.91157
Tjap1	-0.545203	0.0376021	1.25997	1.38825	1.02484	0.850812	1.34912	0.711992	1.22435	0.97064
Rft1	-0.546385	0.0287249	0.705261	0.697068	0.728559	0.466586	0.562381	0.625618	0.710296	0.551528
Dnmt3a	-0.546994	0.00168247	2.35491	2.36909	2.57575	1.82981	1.99734	1.80232	2.43325	1.87649
Cebpg	-0.548015	0.00667289	4.25117	4.98693	4.82471	3.24507	3.83277	3.76155	4.6876	3.61313
Phactr2	-0.548245	0.040567	0.0631562	0.0780194	0.0944912	0.0550886	0.055835	0.0694685	0.0785556	0.0601307
Jpt2	-0.548937	0.00819613	2.75266	2.67478	1.88228	1.78776	2.13488	1.66031	2.43657	1.86098
Reep5	-0.549266	0.00860916	31.999	31.7771	26.8498	17.5105	27.131	26.1536	30.2086	23.5984
Tnrc6b	-0.549355	0.00519366	0.995504	1.07649	1.19435	0.937914	0.823192	0.755512	1.08878	0.838873
Acsl3	-0.549383	0.00527695	15.6446	15.5401	15.7731	10.0487	10.1907	17.0984	15.6526	12.4459
Fasn	-0.550099	0.000993005	39.9747	38.4702	31.2621	26.3927	31.9386	25.9754	36.569	28.1022
Gclm	-0.550616	0.0191843	2.01449	1.84623	3.09835	1.27161	1.83741	2.24965	2.31969	1.78623
Mdm4	-0.552119	0.00272157	3.21905	3.85003	4.55639	3.04616	2.65847	3.165	3.87516	2.95654
Carmil1	-0.553069	0.00339233	0.724294	0.723754	0.585589	0.460294	0.523776	0.57652	0.677879	0.520197
G2e3	-0.553095	0.00850383	1.20076	1.33906	1.78654	0.962393	1.00991	1.34092	1.44212	1.1044
4930402H24Rik	-0.553831	0.000437972	2.92768	3.02747	3.50494	2.01805	2.32977	2.9857	3.15336	2.44451
Hecw2	-0.553894	0.0449847	0.0755163	0.0723772	0.110292	0.0736829	0.0595646	0.0620668	0.0860619	0.0651047
Foxo1	-0.55414	0.0236775	0.287502	0.319405	0.367561	0.242311	0.244848	0.257297	0.324822	0.248152
Fam53b	-0.554242	0.00587829	0.609266	0.61316	0.755874	0.419274	0.533421	0.57037	0.659434	0.507688
Strn	-0.554319	0.00027392	11.3884	12.0175	16.2199	9.33935	8.23551	13.0308	13.2086	10.2019
Zfp101	-0.554742	0.0343114	0.569089	0.63333	1.1162	0.552746	0.406547	0.809741	0.772874	0.589678
Als2	-0.555738	0.00833012	0.560909	0.640061	0.584423	0.388163	0.465616	0.521983	0.595131	0.458588
Metap1d	-0.556152	0.0157041	0.612861	0.628741	0.788408	0.517167	0.535698	0.493231	0.67667	0.515365
Lgi3	-0.557114	0.00225796	64.3292	61.0446	62.0803	39.2955	51.9517	53.5637	62.4847	48.2703
Znfx1	-0.55761	0.00768044	1.49492	1.72725	1.55116	1.06521	1.37104	1.22837	1.59111	1.22154
Mbnl2	-0.557645	0.0040662	0.919952	1.09745	1.63723	0.730001	0.968183	1.04984	1.21821	0.916009
Cpeb2	-0.558404	0.00152482	2.19677	2.3222	2.66563	1.63254	1.91596	1.94694	2.39487	1.83181
Cdh11	-0.560032	0.00129581	1.69508	1.88602	1.5528	1.09129	1.5298	1.32578	1.7113	1.31563
C2cd2	-0.560159	0.0190496	0.313691	0.307831	0.272378	0.208095	0.264936	0.212496	0.297966	0.228509
Atp11b	-0.560271	0.0120028	0.413346	0.482247	0.634979	0.401121	0.310719	0.453335	0.510191	0.388392
Acly	-0.560314	0.00344728	4.84548	5.34379	3.97608	2.90905	4.09907	3.84678	4.72178	3.6183
Fitm2	-0.561185	0.0239396	4.62273	4.46774	2.94004	3.22912	3.33557	2.51845	4.01017	3.02771
Samd8	-0.561528	0.00783898	1.24871	1.34006	1.78029	1.17284	0.959786	1.17825	1.45635	1.10362
Sh3kbp1	-0.562541	0.00363395	0.212912	0.223136	0.234968	0.157606	0.188401	0.166814	0.223672	0.17094
Stxbp3	-0.562852	0.00120333	2.3797	2.33987	3.42296	1.67716	1.89093	2.66735	2.71418	2.07848
Qsox2	-0.563082	0.00347934	2.8387	2.62855	2.21462	1.88442	1.9566	1.98918	2.56062	1.9434
Adi1	-0.563217	0.00766527	16.1826	15.1639	16.7305	9.98863	14.4909	12.5702	16.0256	12.3499
Gpr107	-0.564373	0.00462954	1.14511	1.05582	0.833984	0.737664	0.822831	0.735459	1.01164	0.765318
Ywhaq	-0.564579	0.0234639	2.5935	2.82649	2.75343	1.3156	2.56074	2.62007	2.72447	2.16547
Iars	-0.565388	0.000891404	4.4472	4.35121	4.47559	3.04755	3.62214	3.46195	4.42467	3.37721
Ptgr2	-0.56543	0.046556	0.526333	0.574009	0.671577	0.373993	0.488702	0.489778	0.59064	0.450824
Fbxl5	-0.56664	0.00140015	1.6002	1.61853	2.11011	1.21275	1.32781	1.49505	1.77628	1.3452
Spg20	-0.568747	0.0023017	3.43762	3.82607	4.25662	2.44115	3.23438	3.10641	3.84011	2.92731
Nap1l3	-0.569174	0.0448626	6.58943	7.49569	8.11894	5.53494	6.30081	5.01907	7.40135	5.61827
Fkbp14	-0.570012	0.0136006	1.59734	1.62285	1.4883	1.12629	1.30886	1.14284	1.5695	1.19266
Dclre1c	-0.570143	0.00978179	0.857562	0.997609	1.73257	0.804206	0.632088	1.27658	1.19591	0.904291
Heatr5a	-0.571405	0.0014106	1.00726	1.02768	1.08985	0.682118	0.797298	0.903435	1.0416	0.794284
Npat	-0.571584	0.00220428	2.30099	2.58669	4.197	1.84528	2.09491	2.82309	3.02823	2.25443
Zfhx2	-0.571599	0.0485037	1.07944	1.44966	1.90181	1.08288	1.27672	0.93254	1.47697	1.09738
Csrp1	-0.571798	0.015769	9.86166	8.44727	9.97573	5.25182	8.97373	7.68085	9.42822	7.30213
Vps37c	-0.573767	0.0182678	1.33904	1.54463	1.30641	1.11992	1.28728	0.805715	1.39669	1.07097
Mon2	-0.574135	0.000771487	2.68981	2.70722	3.16719	2.07221	2.20011	2.19218	2.85474	2.15483
Bcl2l2	-0.574197	0.0040662	9.82142	11.7764	11.3497	7.25972	7.77556	10.0634	10.9825	8.36622
Pcdh17	-0.574748	0.000189141	4.50614	4.66331	5.0216	3.29026	3.59523	3.86036	4.73035	3.58195
Pdk3	-0.575675	0.00770782	0.690262	0.691616	0.787802	0.436997	0.591528	0.627289	0.723227	0.551938
Il1rap	-0.575689	0.000683929	1.08272	1.08396	1.4918	0.780482	0.883369	1.09762	1.21949	0.920491
Tenm3	-0.576882	0.0423886	0.0360095	0.0339097	0.0216629	0.0297373	0.0203586	0.0188199	0.0305274	0.0229719
Tjp2	-0.578355	0.00224027	0.812411	0.732196	0.831461	0.545026	0.631108	0.617964	0.792023	0.598033
Prdx6	-0.580201	0.00528378	6.17105	5.65252	5.93552	4.20498	5.04324	4.17687	5.91969	4.47503
Sema3e	-0.580913	0.0460513	0.0937708	0.0856329	0.0913962	0.0517925	0.0742054	0.0810362	0.0902666	0.0690114
Atrn	-0.581709	0.000241718	5.25284	5.11119	7.07627	4.19291	3.89441	4.96314	5.81343	4.35015
Slc6a8	-0.582026	0.00033373	38.7884	39.8366	41.35	25.6153	30.1651	35.2323	39.9916	30.3376
Inpp4a	-0.582462	0.000937095	1.39001	1.43232	1.29071	0.901787	1.05789	1.14663	1.37101	1.03544
Leprot	-0.582562	0.0018568	8.96803	7.96647	7.08407	5.73667	6.20271	6.05941	8.00619	5.9996
Ssh2	-0.583488	0.0043384	0.445294	0.343045	0.501476	0.340453	0.304706	0.3143	0.429938	0.31982
Lpar1	-0.584193	0.00192507	2.06216	2.11896	2.95723	1.33087	1.93873	2.12652	2.37945	1.79871
Tcaim	-0.584721	0.0493859	0.509027	0.599625	0.555292	0.429377	0.475319	0.349722	0.554648	0.41814
Tmod2	-0.585091	0.000156433	13.4057	13.8314	20.7096	10.0413	10.7781	15.0315	15.9822	11.9503
Tmem170	-0.587727	0.016891	2.42536	2.83785	2.26447	1.44365	2.53703	1.77956	2.50923	1.92008
Borcs8	-0.588117	0.0106298	4.1034	4.84932	3.42396	2.96645	3.92997	2.44621	4.12556	3.11421
Slc25a51	-0.588492	0.00133351	8.69699	8.66176	9.37877	5.85827	7.29225	6.95482	8.91251	6.70178
Tkt	-0.58916	0.00197161	4.00862	4.37717	2.88498	2.6752	2.90134	2.74555	3.75692	2.77403
Gabbr1	-0.589322	0.0182649	4.60711	4.88123	5.70091	4.36303	4.2852	2.85712	5.06308	3.83512
Fbxw17	-0.591371	0.0345505	1.08917	1.21677	0.970734	0.79677	0.816157	0.828079	1.09223	0.813669
Ube2d1	-0.591983	0.00642662	2.15586	2.60868	3.31885	1.62659	2.37292	2.01948	2.69446	2.00633
Lipa	-0.592006	0.00272763	1.9444	2.11634	1.79844	1.2977	1.78619	1.33033	1.95306	1.47141
Gdpd5	-0.592023	0.0377342	0.211624	0.244043	0.207862	0.165293	0.194516	0.138527	0.221176	0.166112
Inpp5f	-0.592971	0.00702782	0.892141	0.997108	1.24095	0.763288	0.84143	0.715096	1.0434	0.773271
Shisa4	-0.59397	0.00100527	99.2383	84.6234	77.2079	59.6036	70.8543	63.8175	87.0232	64.7585
Snx33	-0.595137	0.0256196	2.73871	2.88486	3.41524	1.82626	2.89108	2.1156	3.01293	2.27765
Slc35a2	-0.596325	0.0258386	3.40143	3.43464	2.35812	1.7883	2.86429	2.21677	3.06473	2.28979
Nebl	-0.596378	0.0113931	0.0750254	0.093665	0.100439	0.0652436	0.0698149	0.0641281	0.0897097	0.0663955
Kctd9	-0.596677	0.0470101	0.564074	0.713826	0.813342	0.5131	0.550212	0.479753	0.697081	0.514355
Myo18a	-0.596734	0.00129081	1.24939	1.30377	1.38126	0.760957	1.00846	1.20959	1.31147	0.993
Atl3	-0.597264	0.000240316	2.98512	3.41873	4.04473	2.29262	2.28974	3.24626	3.48286	2.60954
Zbtb7a	-0.598607	0.0228596	1.41101	1.49999	1.46415	0.944003	1.36891	0.982983	1.45839	1.09863
Stxbp2	-0.60012	0.00502231	3.87079	3.96817	4.26753	2.62038	3.45068	2.97357	4.0355	3.01488
Insig1	-0.600223	0.00681371	20.5414	21.4606	19.9653	11.8547	13.7427	22.1635	20.6558	15.9203
Klf7	-0.600933	0.00311073	0.633696	0.64038	0.903227	0.513921	0.507826	0.5768	0.725768	0.532849
Lingo2	-0.602039	0.00124709	0.0824998	0.0748035	0.0880664	0.0511736	0.0581187	0.0746412	0.0817899	0.0613112
Usp30	-0.603809	0.00224916	1.74794	1.62643	1.68458	1.03999	1.37405	1.36368	1.68631	1.25924
Baz2b	-0.605577	0.000351469	0.537752	0.546296	0.804904	0.386284	0.44043	0.564706	0.629651	0.463807
Itch	-0.605756	0.000470048	2.38591	2.61601	2.88206	1.71722	2.17224	1.95652	2.62799	1.94866
E130308A19Rik	-0.607566	0.000105693	1.38103	1.34286	1.7199	1.02012	0.942322	1.34109	1.48126	1.10118
Nceh1	-0.607661	0.00152097	0.807392	0.618563	0.67369	0.543941	0.504342	0.496438	0.699882	0.514907
Ggct	-0.608356	0.0160451	2.38895	2.73614	2.35779	1.5137	2.31587	1.7648	2.49429	1.86479
Sv2a	-0.608795	8.66e-05	21.4918	22.7037	22.3542	15.7126	17.0166	16.4461	22.1832	16.3918
Dop1b	-0.609251	0.00376824	1.40653	1.30158	1.62715	0.825864	1.23988	1.1722	1.44509	1.07932
Dcun1d4	-0.610623	0.000461943	1.15713	1.18981	1.28677	0.784943	0.875115	1.03539	1.21123	0.898483
Atf7	-0.610794	0.000905819	1.54364	1.74144	1.92179	1.29915	1.31611	1.21235	1.73562	1.27587
Mvk	-0.610893	0.00627546	3.68338	3.37189	2.83057	2.11767	2.93108	2.27017	3.29528	2.43964
Slc11a2	-0.611283	0.000643681	2.00256	2.19288	1.80572	1.48103	1.4932	1.43842	2.00039	1.47089
Ank	-0.614548	0.00061502	1.10306	1.05226	1.26979	0.713365	0.876619	0.939117	1.1417	0.843033
Abcd4	-0.615813	0.0136928	1.77298	1.87504	1.45779	1.05693	1.40645	1.29385	1.70194	1.25241
Tfdp2	-0.616094	0.00191288	0.383204	0.375517	0.595905	0.290189	0.293021	0.402074	0.451542	0.328428
Auts2	-0.617715	0.00079478	0.0580259	0.0667821	0.0723556	0.0399908	0.0516201	0.0537261	0.0657212	0.0484457
Smim13	-0.617889	0.000231501	5.80853	5.67751	7.14295	4.2115	4.42538	5.00337	6.20966	4.54675
Hdac11	-0.621174	0.013152	2.22674	2.06863	2.0636	1.33401	1.98951	1.40373	2.11966	1.57575
Map7d1	-0.621317	0.000615021	17.5548	16.4532	17.1557	11.5368	14.5466	11.604	17.0546	12.5625
Scrib	-0.623077	0.00364152	2.27404	2.17365	2.26733	1.49005	1.87638	1.56776	2.23834	1.64473
Enoph1	-0.624659	0.00409456	2.94811	2.97069	2.6612	1.59623	2.57426	2.20376	2.86	2.12475
Zfyve1	-0.624723	0.00338729	0.902722	1.0614	1.09991	0.604392	0.913013	0.743255	1.02134	0.753554
Faah	-0.624873	0.0035866	0.841326	0.823043	0.778352	0.526863	0.64138	0.621413	0.81424	0.596552
Pcyt1b	-0.624911	0.00617035	0.583125	0.540899	0.546606	0.478162	0.445148	0.313644	0.556877	0.412318
Cyth1	-0.625318	0.0111208	0.584809	0.470571	0.630514	0.306455	0.468014	0.470974	0.561965	0.415148
Mfsd14a	-0.62628	0.00027392	4.13354	4.74201	5.75484	2.81447	3.80841	4.09149	4.8768	3.57146
Alox5	-0.628686	0.026068	1.18852	1.11402	0.901168	0.515998	0.978366	0.901965	1.0679	0.798776
Map4k2	-0.629558	0.00379071	1.88917	2.57536	2.35155	1.39912	1.80732	1.74758	2.27203	1.65134
Paqr4	-0.631417	0.00518042	9.40275	9.31349	7.27418	5.84774	7.9867	5.22892	8.66347	6.35445
Tmem189	-0.631536	0.00283243	1.17961	1.10271	1.11515	0.71898	0.932755	0.831064	1.13249	0.8276
Tmem98	-0.634785	0.0101879	6.1742	6.28962	5.82526	3.03225	6.00098	4.71259	6.09636	4.58194
Gca	-0.635689	0.00284142	1.11097	1.44065	1.50636	0.860787	0.858359	1.24242	1.35266	0.987187
Sbf1	-0.636921	0.000495392	5.69202	5.86529	7.16076	3.47572	4.93819	5.29344	6.23936	4.56912
Fggy	-0.6372	0.0262397	0.046924	0.0453507	0.0406034	0.0297219	0.0343044	0.03221	0.0442927	0.0320787
Trak2	-0.638156	0.00476104	1.61218	1.77235	2.64935	1.53208	1.34058	1.39623	2.0113	1.42296
Nacad	-0.638515	0.000671801	18.5538	17.1504	13.8519	11.0022	14.2361	10.6609	16.5187	11.9664
Bicd2	-0.63866	0.000186801	3.64038	3.80592	3.16238	2.29385	2.67876	2.70151	3.53623	2.55804
Usp25	-0.638715	7.78e-05	1.18443	1.26102	1.8111	0.844719	0.906769	1.33858	1.41885	1.03002
Mtmr2	-0.640689	0.000752873	2.62844	2.72532	3.67443	1.61653	2.40277	2.5575	3.0094	2.19226
Slain1	-0.641103	0.00214258	4.05289	3.93716	5.20682	2.53703	3.80224	3.25332	4.39896	3.19753
Kat2b	-0.641739	0.0016565	0.39778	0.398221	0.62277	0.262965	0.320842	0.441094	0.472924	0.341634
Pak1	-0.642372	0.00403578	1.82025	1.78492	2.33954	1.00653	1.81184	1.57023	1.98157	1.46287
Srcin1	-0.642418	0.000243708	2.38548	2.62763	2.81397	1.68079	2.12432	1.85673	2.60903	1.88728
Icmt	-0.642484	0.00189276	7.16992	6.11791	6.06436	4.14998	4.97626	4.8412	6.45073	4.65581
Nbas	-0.646011	7.04e-05	0.531158	0.578789	0.694767	0.381863	0.432737	0.482494	0.601571	0.432365
Ppip5k2	-0.646769	0.00111211	0.809916	0.792111	1.16062	0.624727	0.595625	0.747708	0.920882	0.65602
Mgat3	-0.649013	0.000240316	4.0812	3.59672	4.09116	2.71208	2.95316	2.78201	3.92303	2.81575
Cpd	-0.649753	3.68e-05	5.10284	5.24741	6.1001	4.03571	3.58333	4.18208	5.48345	3.93371
Mpp2	-0.650779	0.00701466	2.2657	2.53927	2.73099	1.38695	2.58693	1.61623	2.51198	1.86337
Slc29a3	-0.651414	0.000112777	5.2563	5.3286	6.77038	3.39327	4.27759	4.82147	5.7851	4.16411
Nfasc	-0.651618	0.000169362	78.5084	77.9444	82.8328	45.3871	64.3857	63.9562	79.7619	57.9097
Cdip1	-0.652457	0.000490141	3.27954	3.4209	3.86984	2.26301	2.87925	2.45298	3.52343	2.53174
Prkcz	-0.653095	0.00219161	0.813099	0.85153	0.801634	0.435392	0.71921	0.648733	0.822088	0.601112
Wdr91	-0.653786	0.00766464	0.79137	0.831237	0.864543	0.505346	0.661749	0.623276	0.82905	0.596791
Tmod1	-0.659424	0.00527835	0.328504	0.387888	0.801598	0.195578	0.348483	0.543131	0.505997	0.362398
Gucy1a1	-0.659816	0.000275139	1.39967	1.32171	1.51514	0.933205	0.997472	1.09239	1.41217	1.00769
Fa2h	-0.659947	0.000107091	23.9772	28.037	33.0633	15.2844	23.6028	22.3437	28.3591	20.4103
Aplp1	-0.661545	0.00129581	202.702	207.259	222.672	107.456	195.807	160.745	210.878	154.669
Stx6	-0.662207	0.00032229	1.27931	1.3891	1.22779	0.900605	1.00789	0.866518	1.29873	0.925006
Tob1	-0.66284	0.013152	9.3555	8.04682	8.89024	5.10911	8.02851	5.87069	8.76419	6.3361
Kctd3	-0.663822	0.00111062	1.71974	1.94878	2.09617	1.28995	1.55888	1.25432	1.92157	1.36772
Gpd1	-0.663981	0.00071999	12.2699	14.6357	13.2879	7.28863	12.4955	9.39145	13.3978	9.72518
Gnai1	-0.664018	2.06e-05	2.57846	2.97981	3.49642	1.87832	2.14346	2.3989	3.01823	2.14023
Vwa5a	-0.664923	0.00654287	0.826368	0.944984	1.16081	0.518198	0.727963	0.859204	0.977388	0.701788
Bpgm	-0.665069	3.65e-05	9.5451	9.12516	7.58018	6.17953	6.94509	5.51667	8.75015	6.21376
Stard3	-0.667738	0.0154463	1.08112	1.13267	1.23331	0.724162	1.05869	0.698688	1.14903	0.827181
Pex5l	-0.668488	0.00260084	0.430348	0.457256	0.586577	0.217011	0.404046	0.465461	0.491394	0.362173
Dmpk	-0.668748	0.0396946	1.24523	1.53558	1.80508	1.20967	1.01034	1.00447	1.52863	1.07483
Frmd8	-0.669283	0.00152753	5.71166	6.71373	5.34674	2.86962	5.20613	4.85356	5.92404	4.30977
Tmem117	-0.671165	0.00799163	0.0522732	0.0499704	0.0787174	0.0435599	0.0371888	0.0451683	0.0603203	0.0419723
2021-09-09	-0.672142	0.0448626	0.059332	0.0753101	0.0705451	0.043734	0.0549264	0.0462995	0.0683957	0.04832
Cacnb4	-0.672547	0.000131484	0.528862	0.533179	0.840819	0.347872	0.429643	0.560955	0.634287	0.446157
Fgfr1op	-0.674674	0.0047499	0.887632	0.972605	1.23153	0.795414	0.566795	0.827637	1.03059	0.729949
Sgk2	-0.674853	0.00693873	1.58286	1.64708	1.38264	0.805084	1.485	1.05112	1.53753	1.11374
Acot7	-0.674995	0.000585415	1.59911	1.56948	1.30922	0.923244	1.36709	0.913674	1.4926	1.068
Fntb	-0.675219	0.00218212	0.802022	0.817957	0.758082	0.411383	0.753525	0.561619	0.792687	0.575509
Cep104	-0.675987	0.000623294	2.15185	2.22113	2.50465	1.30036	1.8478	1.74482	2.29254	1.631
Aga	-0.67657	0.00933611	1.98705	1.97189	1.53286	1.18362	1.38175	1.28805	1.8306	1.28448
Kif1a	-0.677315	7.56e-06	16.6512	16.4784	18.7808	11.0024	12.445	13.1595	17.3035	12.2023
Gm13889	-0.677554	0.0237272	13.8766	12.2388	9.43578	8.44967	10.5685	6.22642	11.8504	8.41487
Klf6	-0.677788	0.00470606	3.82134	4.12373	4.68756	2.2212	3.69017	3.13521	4.21088	3.01553
Rell1	-0.679033	0.00165474	1.19666	1.12744	1.08376	0.811919	0.595637	1.04936	1.13596	0.81897
Bcorl1	-0.679334	0.00465474	0.36317	0.472723	0.363247	0.230733	0.369604	0.252958	0.399713	0.284431
Jam3	-0.679343	0.000723451	4.48251	4.15945	3.63652	2.29297	3.42175	3.0015	4.09283	2.90541
Kif3c	-0.67985	0.000461943	2.03016	2.07756	2.17231	1.34977	1.71581	1.37472	2.09334	1.4801
Rcan2	-0.680085	0.00399711	0.235137	0.235244	0.345458	0.174998	0.20992	0.180878	0.271946	0.188599
Kmt5a	-0.682341	0.000137217	7.81797	7.53512	7.69181	4.70629	6.13892	5.42514	7.68163	5.42345
Plcl1	-0.68263	0.000307123	0.184225	0.177894	0.25943	0.121638	0.139695	0.173384	0.207183	0.144906
Glod4	-0.683365	0.000543384	1.21705	1.04652	1.27896	0.687336	0.913793	0.895862	1.18084	0.83233
Nsdhl	-0.684647	0.000481011	3.73539	3.26874	3.21162	2.11713	2.81488	2.26558	3.40525	2.39919
Coro7	-0.684899	0.00165474	1.13677	1.16868	1.37855	0.795685	1.0064	0.786202	1.228	0.862764
Acaca	-0.686087	0.000482135	0.220143	0.211627	0.238257	0.154379	0.163552	0.150914	0.223342	0.156281
Tm7sf2	-0.686814	0.00517835	8.03837	7.88483	5.24142	4.1504	6.82504	4.00166	7.05487	4.99237
Hacd2	-0.692008	0.00166979	0.561231	0.509827	0.723649	0.395769	0.425851	0.417588	0.598235	0.413069
Dock10	-0.692889	0.000127046	1.5119	1.62339	3.10341	1.08696	1.32021	1.79788	2.07957	1.40168
Slc25a38	-0.693685	0.00272763	3.5587	3.36587	3.18476	1.83874	2.83419	2.46245	3.36978	2.37846
Ptn	-0.695894	0.000178376	17.9635	15.6139	17.477	14.4831	11.8631	9.58054	17.0181	11.9756
Dact1	-0.696607	0.0243936	1.35296	1.55955	1.01244	0.884974	0.954544	0.854569	1.30832	0.898029
Josd2	-0.696854	0.00254922	27.2636	30.3105	23.364	14.8687	29.6865	14.6452	26.9794	19.7335
Tspan15	-0.697773	5.46e-05	4.3703	4.16442	5.00007	2.53452	3.19212	3.76604	4.5116	3.16423
Cep97	-0.69803	0.00840228	0.771768	0.710978	0.920165	0.55727	0.614321	0.493224	0.800971	0.554938
Ccdc74a	-0.698275	0.029285	4.42175	4.26317	4.02419	2.01105	3.04357	4.0762	4.23637	3.0436
Fam228b	-0.698706	0.0409862	0.364077	0.386313	0.605032	0.344792	0.25882	0.320435	0.451807	0.308016
Tmprss5	-0.701635	0.0487026	0.311364	0.384333	0.26427	0.157516	0.251181	0.263294	0.319989	0.223997
Gpd2	-0.701788	2.57e-05	0.830509	0.838593	0.915787	0.53106	0.588024	0.678517	0.86163	0.5992
Carhsp1	-0.703581	0.000583024	22.7912	21.8569	19.8898	11.1075	16.8275	17.4869	21.5126	15.1407
Bace2	-0.70425	0.000661097	1.2709	1.1349	1.19035	0.651303	0.810137	1.0721	1.19872	0.844513
Elovl7	-0.704277	4.57e-05	7.33144	6.99205	10.0634	4.10283	5.50279	7.54827	8.12896	5.71796
Tmeff2	-0.707949	0.000230961	4.06938	4.10209	4.36389	2.0444	3.32256	3.51098	4.17845	2.95931
Mapk8ip1	-0.709339	0.00376824	12.0904	11.6672	9.11765	5.19256	10.899	7.38266	10.9584	7.82475
Cnksr3	-0.709354	0.00112089	2.18842	2.22738	1.75963	1.02078	1.73488	1.57619	2.05848	1.44395
Ablim2	-0.712415	0.00020019	1.27692	1.23178	1.80225	0.701505	1.04203	1.25982	1.43698	1.00112
5031439G07Rik	-0.713745	9.68e-05	10.6549	9.83429	11.8129	5.62069	7.81578	9.12056	10.7673	7.51901
Ttyh1	-0.714352	0.000137175	43.1586	40.5391	49.2058	23.0815	34.5434	34.9529	44.3012	30.8593
Rnf220	-0.71553	0.000255957	0.826485	0.757053	0.966483	0.489136	0.665989	0.60026	0.850007	0.585128
Phgdh	-0.717006	0.00907105	0.793045	0.725439	0.84453	0.441119	0.623733	0.567231	0.787671	0.544028
Aacs	-0.71745	0.00231692	1.50592	1.59596	0.95383	0.724997	1.14252	0.888991	1.3519	0.918836
Hivep3	-0.718112	0.000267722	0.149628	0.146389	0.190164	0.101185	0.114267	0.115877	0.162061	0.110443
Agpat4	-0.718922	3.01e-05	2.48774	2.29425	1.57297	1.4034	1.66667	1.23107	2.11832	1.43372
Apc	-0.719065	0.000454799	4.29523	4.74272	7.84415	3.83858	3.32765	4.00544	5.62737	3.72389
Lzts2	-0.724158	0.0375498	1.283	1.12798	1.15777	0.578556	1.12288	0.806687	1.18958	0.836043
Tarsl2	-0.725499	0.000137175	1.2622	1.1471	1.47005	0.770094	0.853952	1.02453	1.29312	0.882859
Parp4	-0.725663	0.0121734	0.177461	0.201178	0.187113	0.103805	0.124209	0.162838	0.188584	0.130284
Fgfr2	-0.726148	8.36e-05	0.0963953	0.0962844	0.116647	0.0499591	0.0716713	0.0952567	0.103109	0.0722957
Slc43a2	-0.72622	0.000584895	2.68099	2.35589	3.01272	1.97186	1.95009	1.5594	2.6832	1.82712
Pigk	-0.726304	0.000191902	0.232679	0.198207	0.209535	0.135889	0.144192	0.155824	0.213474	0.145302
Kank2	-0.727203	0.00804791	0.634728	0.811692	0.654733	0.329045	0.51549	0.61975	0.700385	0.488095
Hmox2	-0.727825	0.000785932	0.925565	0.990402	1.15712	0.645321	0.757921	0.682608	1.02436	0.695283
Sqle	-0.728334	1.17e-05	23.7612	23.6884	19.3611	13.469	17.5804	14.4643	22.2702	15.1712
Nectin1	-0.730175	0.00207688	0.409012	0.410384	0.427978	0.305207	0.319422	0.229316	0.415791	0.284649
Tmem178b	-0.731756	0.00132165	0.512526	0.550985	0.772315	0.449819	0.420798	0.358025	0.611942	0.409547
Nkain1	-0.732741	0.00517835	0.818747	0.791341	1.19273	0.52857	0.750189	0.608572	0.934272	0.62911
Thsd7a	-0.734168	6.8e-06	0.276472	0.28722	0.373634	0.204706	0.18121	0.248576	0.312442	0.211497
Dip2b	-0.73506	5.91e-06	4.20834	4.14435	4.98972	2.39321	3.10785	3.62674	4.44747	3.0426
Slc8a3	-0.735093	0.00129581	0.341299	0.281683	0.533959	0.289832	0.196283	0.280616	0.385647	0.255577
Plod1	-0.735502	4.05e-05	5.28162	5.49175	5.76931	3.29465	4.34651	3.61871	5.51422	3.75329
H2bc4	-0.738461	0.00563992	4.43274	3.7234	4.10787	2.29073	3.61611	2.51647	4.088	2.80777
Dnajc16	-0.738831	0.000345862	1.44773	1.47674	1.35647	0.870296	1.11099	0.921135	1.42698	0.967474
Clcn5	-0.740247	0.000548764	0.250274	0.247023	0.262767	0.19571	0.164588	0.154221	0.253355	0.171506
Csf1	-0.741138	4.7e-05	3.98822	4.34584	6.14806	2.50041	3.32473	3.92831	4.82738	3.25115
Map4	-0.741668	4.43e-05	2.88628	3.29362	4.88236	2.19156	2.4462	2.64615	3.68742	2.42797
Sema4f	-0.742004	0.00110138	4.91621	4.25115	3.4644	2.19908	3.23827	3.09256	4.21059	2.8433
Mid1ip1	-0.743543	0.00020019	10.344	11.3052	8.83591	6.05114	7.96643	6.52161	10.1617	6.84639
Ilvbl	-0.743676	0.00415926	2.80246	3.1929	2.82103	1.43901	1.9092	2.77342	2.9388	2.04054
Ninj2	-0.744083	0.00563992	0.206845	0.175118	0.215212	0.13443	0.143328	0.123187	0.199058	0.133648
D1Ertd622e	-0.74558	0.00288416	0.51929	0.471734	0.594563	0.29124	0.40686	0.372808	0.528529	0.356969
D16Ertd472e	-0.746042	0.000386664	1.34709	1.36215	2.07454	0.73775	1.1133	1.40189	1.59459	1.08431
Nrbp2	-0.74817	0.00136223	23.2346	27.3514	48.3719	15.2778	26.1387	23.2632	32.9859	21.5599
Ap5z1	-0.748979	0.000218841	3.24306	3.1782	2.89012	1.92188	2.33877	1.99426	3.10379	2.08497
Acap2	-0.749631	8.12e-05	1.03929	1.02877	1.85516	0.794336	0.74467	1.01101	1.30774	0.850007
Phactr4	-0.749816	9.27e-05	1.19406	1.28145	1.58416	0.861935	0.94621	0.893804	1.35323	0.90065
Rap1a	-0.750319	7.78e-05	1.7495	1.80104	2.7036	0.969845	1.48771	1.77328	2.08471	1.41028
Oxr1	-0.751657	0.00108946	0.125155	0.122187	0.237934	0.0918036	0.101124	0.118004	0.161758	0.103644
Nipa1	-0.752142	0.000172267	1.70406	1.6618	2.01362	0.88295	1.1496	1.67195	1.79316	1.23484
Eml2	-0.752198	0.0068309	0.558264	0.623255	0.933115	0.398705	0.501681	0.488538	0.704878	0.462975
Rps6ka5	-0.752554	0.000921194	0.159066	0.157404	0.210875	0.091382	0.119247	0.144683	0.175782	0.118437
Zfp14	-0.752722	0.00516885	1.49374	1.78699	2.09709	0.978088	1.56505	1.088	1.79261	1.21038
Klf13	-0.754666	0.000140149	2.81026	2.60472	3.44584	1.7447	2.21932	1.94142	2.95361	1.96848
Plch2	-0.755858	0.00180338	0.331273	0.306898	0.332912	0.191034	0.204713	0.2566	0.323695	0.217449
Lcp1	-0.758593	0.00957078	0.132509	0.129142	0.243634	0.0689985	0.106731	0.166118	0.168428	0.113949
Lrrc75b	-0.760443	0.0109956	1.67428	1.94147	2.16766	1.18182	1.65755	1.04775	1.9278	1.29571
Cep72	-0.761567	0.0314419	0.383622	0.321211	0.412812	0.239779	0.2407	0.259809	0.372548	0.246763
Dcbld2	-0.761925	0.00013566	1.35114	1.36251	1.0733	0.695229	0.986404	0.843033	1.26231	0.841555
Spata13	-0.763119	6.62e-06	0.720408	0.765835	0.705459	0.506995	0.44313	0.506487	0.730567	0.485537
Usp31	-0.763146	0.00163615	0.908442	1.27452	1.51193	0.743242	1.00733	0.680021	1.23163	0.810197
Ctnna1	-0.76755	7.04e-05	0.914489	0.958276	1.07657	0.475036	0.766429	0.749136	0.98311	0.663534
Dhcr7	-0.767891	8.54e-05	7.01465	5.87192	4.34005	3.79206	4.89569	2.78715	5.74221	3.82497
Stard4	-0.768637	0.00231692	3.2713	2.88723	2.81247	1.56176	1.7166	2.85011	2.99033	2.04282
Sema7a	-0.768868	0.0094084	0.691643	0.874902	0.830671	0.533561	0.66003	0.407131	0.799072	0.533574
Ipo13	-0.769302	6.82e-05	12.011	11.5223	11.9121	6.05773	9.42159	8.33053	11.8151	7.93662
Elavl3	-0.771353	6.83e-06	8.10046	9.02505	10.3066	4.94016	7.04557	6.22552	9.14404	6.07042
Sytl5	-0.771815	0.00284142	0.184551	0.175319	0.279564	0.0993893	0.141949	0.183924	0.213145	0.141754
Sec61a2	-0.773672	0.000314612	1.91622	1.97506	2.23055	1.55315	1.26498	1.2262	2.04061	1.34811
Magt1	-0.774243	3.25e-05	1.37893	1.47584	1.78337	0.91756	1.04833	1.07928	1.54605	1.01506
Kctd13	-0.775659	0.0094084	1.43113	1.32274	1.79533	0.853942	1.30499	0.867677	1.5164	1.00887
Snx15	-0.776315	0.000360227	12.3221	11.6526	12.3977	5.58342	9.17218	9.82742	12.1241	8.19434
Ddr1	-0.776569	0.000104365	6.15951	6.63042	5.80709	2.94826	4.99416	4.56044	6.19901	4.16762
Ankrd13b	-0.777826	0.00231692	1.82243	1.75523	2.28993	1.17239	1.555	1.13795	1.95586	1.28845
Wnk1	-0.778254	6.15e-06	7.83526	8.38849	13.7123	5.60748	6.11487	7.44636	9.97869	6.38957
Tecpr2	-0.778794	0.000105787	0.838563	0.805076	1.05288	0.456717	0.646386	0.681283	0.898841	0.594795
Arc	-0.779461	0.00937646	6.8577	8.55031	6.1515	2.72757	7.17792	5.05396	7.1865	4.98648
Stk39	-0.779849	1.98e-06	0.649654	0.612032	0.79234	0.375667	0.439019	0.539626	0.684675	0.451437
Itgb3	-0.77993	0.00332636	0.243033	0.371974	0.255702	0.173276	0.207919	0.182025	0.290236	0.18774
Dusp3	-0.780531	0.000122745	4.14465	4.30227	5.77985	2.76267	3.35794	3.13684	4.74226	3.08582
Fam107b	-0.783157	0.000371204	1.75367	1.87042	1.32565	0.759541	1.27417	1.25572	1.64991	1.09648
Ugt8a	-0.785763	8.07e-07	32.6395	32.9941	48.006	18.4954	24.7085	31.5746	37.8799	24.9262
Fez1	-0.785999	8.07e-07	10.0332	10.1362	10.4299	5.69033	7.43263	6.99406	10.1998	6.70568
Heatr3	-0.786672	8.71e-07	3.52587	4.03826	4.01869	2.29904	2.68319	2.583	3.86094	2.52174
Mbp	-0.786959	4.76e-05	119.34	125.733	160.45	64.4003	110.31	94.5642	135.174	89.7583
Plpp2	-0.788832	0.00133351	6.3926	5.66181	6.66924	3.34875	5.19588	3.84436	6.24122	4.12966
Slc5a3	-0.79163	0.000519022	1.14927	1.52953	1.46138	0.870049	1.07381	0.754392	1.38006	0.899417
Hhip	-0.791795	6.22e-07	1.45551	1.65773	2.54493	0.891105	1.14898	1.65327	1.88606	1.23112
Arid3b	-0.79473	0.0199847	0.307098	0.238572	0.331077	0.144861	0.222407	0.205958	0.292249	0.191075
Sort1	-0.795254	0.000738118	1.74345	1.81014	2.79938	0.864843	1.78814	1.56891	2.11765	1.4073
Slc25a27	-0.796104	0.00220894	1.09725	1.45839	1.7356	0.894696	1.07098	0.788131	1.43041	0.917937
Stat2	-0.796839	0.000738118	1.8781	2.20238	1.92802	0.881144	1.39296	1.75358	2.00283	1.34256
Lpgat1	-0.797269	0.000194108	0.877372	0.808252	1.42841	0.611191	0.625824	0.724541	1.03801	0.653852
Lmo2	-0.799547	0.0233987	0.506867	0.418481	0.430066	0.239498	0.275826	0.371961	0.451805	0.295762
Perm1	-0.80065	0.00528378	3.19851	2.9313	2.882	1.67759	2.22519	1.95239	3.00394	1.95173
Slc4a2	-0.800795	0.000728643	2.85576	2.8318	3.60695	1.45948	2.54381	2.12123	3.09817	2.04151
Notch2	-0.800901	0.0015429	0.163976	0.136264	0.218699	0.0983283	0.106509	0.127141	0.172979	0.11066
Plekhg1	-0.802084	1.39e-06	1.25253	1.17923	1.77209	0.713495	0.884286	1.1197	1.40128	0.905828
Shcbp1l	-0.803595	0.00104254	0.713127	0.772205	0.998663	0.468264	0.536292	0.590698	0.827999	0.531751
Plec	-0.804075	0.000816987	0.945039	0.871508	0.628255	0.421776	0.576051	0.570957	0.814934	0.522928
Nav2	-0.8055	1.34e-07	0.87006	0.870606	0.873975	0.516405	0.616334	0.55708	0.871547	0.563273
Slc25a1	-0.805848	0.000100095	26.4274	28.0208	21.4789	15.4858	22.8421	11.9655	25.309	16.7645
Mtm1	-0.8071	0.0276385	0.0937402	0.112461	0.213729	0.0810664	0.0905879	0.0825449	0.139977	0.0847331
Slc16a1	-0.807553	0.000126149	1.77641	1.75655	1.72403	1.07429	1.19727	1.11481	1.75233	1.12879
Abcb10	-0.80971	0.000102607	1.07055	1.18385	1.19119	0.625403	0.739813	0.864561	1.14853	0.743259
Rffl	-0.81009	9.27e-05	1.4304	1.53136	2.16077	0.700598	1.28278	1.3932	1.70751	1.12552
Anxa5	-0.811263	0.00172568	1.67977	2.00717	1.13735	0.696679	1.3791	1.04713	1.6081	1.04097
Rapgef4	-0.812217	0.0318988	0.0525189	0.0479343	0.0996451	0.0478677	0.041061	0.0332621	0.0666994	0.0407303
Vmp1	-0.812425	7.23e-06	1.48684	1.44973	1.54697	0.819889	1.11746	0.960514	1.49451	0.965954
Tssc4	-0.814957	0.000136944	33.1365	33.2653	28.4304	16.5638	19.9306	24.8728	31.6107	20.4557
Erbb3	-0.815214	0.000834285	5.96974	5.6091	7.58178	3.0121	5.63244	3.94788	6.38687	4.19747
Rims2	-0.818992	1.51e-06	0.421357	0.430817	0.405623	0.218562	0.290425	0.301646	0.419266	0.270211
Rasal2	-0.81927	2.4e-05	0.425456	0.432822	0.681574	0.318319	0.298997	0.343424	0.513284	0.320247
Parm1	-0.821727	6.67e-05	1.06149	0.87455	1.26421	0.502395	0.70568	0.855958	1.06675	0.688011
Gstm7	-0.821742	0.00256231	9.30552	7.88549	8.41248	3.93468	7.68523	5.26075	8.53449	5.62689
Fbxo36	-0.821838	0.0489749	0.0861584	0.0861453	0.162008	0.0459012	0.0616458	0.109282	0.111437	0.0722763
Nmral1	-0.822529	0.00220894	5.77234	4.94121	6.71193	3.70118	4.65513	2.85956	5.80849	3.73862
Larp6	-0.823142	0.00181038	0.669214	0.649078	0.903661	0.380457	0.478704	0.557287	0.740651	0.472149
Tmbim1	-0.825396	7.18e-06	22.3884	23.8214	22.3082	10.6765	15.5797	18.3394	22.8393	14.8652
Tppp	-0.826011	7.73e-06	50.4641	49.7626	58.8598	23.6385	37.5658	42.6474	53.0288	34.6172
Rapgef5	-0.826345	6.67e-05	0.258264	0.293638	0.286428	0.137004	0.234439	0.172757	0.279443	0.1814
Mob3b	-0.826965	2.95e-08	1.17453	1.24215	1.71767	0.730922	0.810883	1.08338	1.37812	0.875061
Utp14b	-0.829699	2.92e-07	12.2954	16.2047	16.6601	8.55666	8.39451	11.7658	15.0534	9.57234
Fkbp9	-0.830289	0.000105746	7.47693	7.33377	5.91775	3.28763	4.44908	5.63662	6.90948	4.45778
Bace1	-0.830343	3.29e-08	14.864	15.6016	17.0661	8.3588	10.104	11.9128	15.8439	10.1252
Eml1	-0.830793	6.82e-05	2.68108	2.61959	2.3186	1.13976	1.8522	1.95091	2.53976	1.64762
Klhl2	-0.831994	3.17e-06	3.85909	3.6147	4.80898	1.90963	2.74786	3.23796	4.09426	2.63182
Sema4d	-0.832415	4.04e-05	13.4717	11.8485	10.9322	5.82346	9.22689	8.1988	12.0842	7.74972
Bcl2l11	-0.83317	0.00236458	0.405787	0.347876	0.583425	0.239333	0.241251	0.363062	0.445696	0.281215
Tmem268	-0.833582	0.00240557	1.0232	0.917869	1.24294	0.420614	0.769781	0.895798	1.06134	0.695398
Pdzrn3	-0.836109	3.78e-05	0.188224	0.181896	0.206321	0.101955	0.125184	0.138889	0.192147	0.122009
Rgs3	-0.837744	0.00264469	0.115564	0.139343	0.190944	0.0557866	0.117804	0.11546	0.148617	0.0963505
Pmvk	-0.838399	4.53e-05	6.39276	6.11207	3.6692	2.99749	4.26466	2.80497	5.39135	3.3557
Hspa2	-0.838837	0.000101756	52.1692	41.7438	42.5512	22.257	30.6734	33.757	45.4881	28.8958
Zfp57	-0.841401	4.34e-05	4.01726	4.05111	7.76773	2.99604	2.50198	4.22202	5.2787	3.24001
Exoc6b	-0.841449	8.25e-06	0.49952	0.517254	0.716376	0.348374	0.375114	0.351661	0.577717	0.358383
Daam1	-0.84214	1.02e-06	1.00488	1.01384	1.72555	0.618586	0.738752	0.956498	1.24809	0.771279
Npc2	-0.844289	3.18e-05	16.7553	15.9509	13.2694	7.27085	11.8142	10.1605	15.3252	9.74851
Rhob	-0.844946	3.09e-05	69.7718	66.7125	85.542	33.4924	55.2965	53.0203	74.0088	47.2697
Enpp2	-0.845537	6.31e-08	22.6177	24.3942	31.4503	12.9537	17.5564	18.8091	26.154	16.4398
Ttll5	-0.846572	1.81e-06	0.432474	0.463221	0.569698	0.261409	0.33361	0.321906	0.488465	0.305642
Arhgap23	-0.846912	3.64e-08	3.84535	4.70653	5.12762	2.26007	3.23579	3.11761	4.55983	2.87116
Tmem74	-0.848326	0.0384446	0.969417	1.77143	1.86459	0.832075	1.1521	0.824386	1.53514	0.936188
Fdft1	-0.851296	2.26e-06	5.11735	5.22744	4.39401	2.48184	3.53565	3.25506	4.91293	3.09085
Grhl1	-0.853525	0.010759	0.220771	0.241623	0.236103	0.116568	0.165761	0.156943	0.232832	0.146424
Ehhadh	-0.854667	0.00434039	0.551676	0.638543	0.599555	0.27408	0.344067	0.53389	0.596591	0.384012
Zbtb7b	-0.855893	0.00704856	0.599224	0.604638	0.86681	0.347541	0.432744	0.505542	0.690224	0.428609
Atg4c	-0.860105	9.48e-05	0.474208	0.506095	0.817741	0.299425	0.367571	0.428868	0.599348	0.365288
Limch1	-0.860715	6.37e-07	0.510212	0.48751	0.810643	0.316921	0.347225	0.438332	0.602788	0.367493
Itih5	-0.860806	0.00712533	0.0997096	0.119858	0.201055	0.074353	0.0855477	0.091436	0.140208	0.0837789
Jup	-0.86204	0.00126732	0.712786	0.900597	0.846218	0.373139	0.739137	0.462778	0.819867	0.525018
Rasal1	-0.862491	0.00924766	0.44729	0.450596	0.560345	0.170802	0.362266	0.418335	0.486077	0.317134
Elovl6	-0.863102	7.84e-09	3.95164	4.32894	5.75262	2.33492	2.8859	3.47045	4.67773	2.89709
Map1a	-0.865149	2.48e-08	77.9842	79.5795	87.626	41.0337	54.6332	57.3783	81.7299	51.0151
Sccpdh	-0.866657	9.06e-07	20.7651	20.6453	23.0666	10.2264	15.4449	14.7578	21.4923	13.4764
Pcyt2	-0.868677	3.17e-06	12.531	14.1385	11.7055	6.26565	10.2205	7.58019	12.7916	8.02212
Rras	-0.870823	0.00260084	6.42075	5.30286	5.45314	2.72716	4.36649	3.61647	5.72558	3.57004
Myorg	-0.870968	0.000464524	2.4023	2.80883	2.87075	1.33498	1.75544	1.92515	2.69396	1.67186
Hspg2	-0.875759	0.000278202	0.419428	0.439495	0.503634	0.326425	0.29611	0.220331	0.454186	0.280955
Kcna1	-0.875801	0.000180384	18.7179	16.5497	39.8243	12.2569	14.0342	16.6299	25.0306	14.307
Arid5b	-0.876694	0.00202667	0.15383	0.170264	0.259374	0.112529	0.139172	0.0994893	0.194489	0.117063
Hmgcr	-0.877889	1.95e-06	27.1252	24.8016	22.0131	12.2558	15.682	17.7234	24.6466	15.2204
Fam57a	-0.879756	5.94e-06	3.32402	3.30775	3.23633	1.57704	2.48553	2.07797	3.28937	2.04685
Plk3	-0.880763	3.33e-05	11.2684	10.2837	12.8722	5.08414	7.35366	9.08064	11.4748	7.17281
Kif13b	-0.881129	7.03e-06	0.441491	0.491011	0.602865	0.258622	0.36649	0.315441	0.511789	0.313518
Ptpdc1	-0.881495	1.67e-07	2.45031	2.17687	3.18258	1.45293	1.47569	1.81379	2.60325	1.5808
Tyro3	-0.884158	5.18e-06	5.71844	6.19928	6.59402	2.60017	4.45435	4.56585	6.17058	3.87346
Selenop	-0.884361	2.27e-05	10.2274	14.6097	22.0407	4.68052	12.2165	13.0464	15.6259	9.98112
Ccdc13	-0.885118	0.0163242	0.301235	0.275605	0.274302	0.110903	0.234777	0.192629	0.283714	0.179437
Bmp2	-0.88796	0.0376889	0.567385	0.562656	0.720222	0.338831	0.419444	0.365118	0.616754	0.374464
Tmeff1	-0.889255	1.61e-07	2.26233	2.15607	2.91318	1.26368	1.53381	1.65103	2.44386	1.48284
Enpp4	-0.890912	4.81e-08	10.7468	11.2061	15.0381	6.07145	7.26961	9.20302	12.3303	7.51469
Jph1	-0.891232	0.00528378	0.0972833	0.0925554	0.177758	0.0556762	0.0812691	0.0802105	0.122532	0.0723853
Stn1	-0.891572	0.0260506	0.22247	0.219792	0.211797	0.0954009	0.165042	0.144538	0.21802	0.134994
Ippk	-0.895059	2.62e-07	1.41039	1.49072	1.8385	0.788891	0.876097	1.24119	1.57987	0.968725
Mvd	-0.895612	0.000170129	11.6673	11.4096	5.91088	4.50364	7.29727	5.30662	9.6626	5.70251
Pi4k2b	-0.895825	0.0264311	0.243534	0.275747	0.32144	0.103041	0.209956	0.21428	0.280241	0.175759
Slk	-0.895977	2e-07	3.10044	2.94811	5.56262	1.88573	2.07682	2.88648	3.87039	2.28301
Arhgap29	-0.896067	0.000399678	0.422185	0.455903	0.44852	0.184246	0.276309	0.370628	0.442203	0.277061
Adipor2	-0.896736	1.08e-05	1.8731	1.68419	2.36317	1.03494	1.35263	1.18183	1.97349	1.1898
Sspn	-0.897015	0.000189617	0.944547	0.807357	1.09435	0.649331	0.55286	0.513566	0.948752	0.571919
Afap1l1	-0.898909	2.69e-05	0.842999	0.855413	1.00593	0.387717	0.61411	0.66718	0.901447	0.556336
Retreg1	-0.899648	7.28e-05	0.298632	0.302996	0.497681	0.15879	0.242767	0.257953	0.366436	0.219837
Amy1	-0.902621	0.0172448	0.143467	0.187256	0.375086	0.131937	0.119302	0.143272	0.235269	0.131504
Sft2d2	-0.904552	0.000260458	1.1774	1.16061	1.90665	0.688587	0.882661	0.940424	1.41489	0.837224
Rbms2	-0.906689	0.0213417	0.172792	0.175571	0.149266	0.126922	0.110509	0.0679898	0.165877	0.101807
Myo6	-0.907924	1.59e-09	2.15178	2.22152	2.9873	1.15805	1.4224	1.87591	2.45353	1.48545
Usp54	-0.90994	1.81e-06	2.31278	2.57271	3.85459	1.3728	1.95424	1.84377	2.91336	1.7236
Mink1	-0.910121	6.41e-05	1.28658	1.37202	1.62205	0.711787	1.14201	0.757475	1.42689	0.870424
Atp10b	-0.910826	3.52e-08	1.98131	1.84545	1.92894	0.977508	1.18887	1.30448	1.91856	1.15695
Ano4	-0.910886	9.11e-07	0.238734	0.232376	0.332775	0.11801	0.167953	0.20019	0.267962	0.162051
Slc10a7	-0.912642	4.24e-05	0.155694	0.149152	0.124525	0.0767553	0.0981551	0.0821322	0.143124	0.0856809
Chchd7	-0.914759	0.0330152	0.490445	0.644559	0.493509	0.286203	0.469066	0.241585	0.542838	0.332285
Trim13	-0.915011	0.000377122	4.47929	5.17123	4.20839	1.88819	4.29625	2.52379	4.61964	2.90275
Kif24	-0.91508	0.0105758	0.113589	0.087473	0.147692	0.0646622	0.0538431	0.0904052	0.116251	0.0696368
Lss	-0.918109	8.83e-07	13.0115	13.6259	13.4826	5.65037	8.54878	10.4524	13.3733	8.21718
2021-09-04	-0.919637	0.04853	25.9211	26.9932	33.6038	9.92225	22.687	22.0143	28.8394	18.2079
Sall1	-0.920304	9.08e-07	3.6861	3.71434	4.8695	2.09679	2.5493	2.63396	4.08998	2.42668
Desi1	-0.920721	2.88e-05	5.85445	5.52798	6.66933	2.88061	4.88206	3.2465	6.01725	3.66972
Lrrc8c	-0.92211	1.47e-06	0.751746	0.763856	1.10062	0.431927	0.544797	0.565468	0.872075	0.514064
Fgf1	-0.924858	0.000567302	0.123894	0.187494	0.272584	0.0655742	0.12771	0.156765	0.194657	0.116683
Bmp2k	-0.931568	3.15e-05	0.398163	0.397878	0.70081	0.189664	0.308155	0.391045	0.49895	0.296288
Prima1	-0.932069	0.000921903	0.623665	0.545525	0.658136	0.230736	0.432783	0.452788	0.609109	0.372102
Napepld	-0.933816	0.00152097	0.397627	0.430546	0.609827	0.231003	0.340737	0.271943	0.479333	0.281228
Abca2	-0.933827	4.21e-07	44.1869	45.2216	50.1607	20.9715	34.9682	28.068	46.5231	28.0026
Tbc1d22b	-0.934269	2.03e-07	1.08709	1.24279	1.04006	0.634982	0.777744	0.581529	1.12331	0.664751
AA986860	-0.935094	0.020587	0.5736	0.576949	0.711697	0.2507	0.465997	0.40497	0.620749	0.373889
Rnf13	-0.935875	1.1e-07	3.20593	3.35974	5.58059	1.76295	2.4555	2.83948	4.04875	2.35264
Pik3c2b	-0.938325	0.000137175	1.10518	1.21349	1.47812	0.688347	1.00247	0.579603	1.2656	0.756806
Cryab	-0.939715	3.56e-05	45.951	51.5079	53.9453	19.3642	45.9821	29.1125	50.4681	31.4863
Paqr8	-0.946547	4.81e-08	7.03667	7.40159	7.5943	3.15962	4.83214	5.16273	7.34419	4.38483
Arap2	-0.949005	4.33e-07	0.492263	0.505633	0.907082	0.222463	0.344862	0.581472	0.634993	0.382932
Kif1b	-0.950364	1.05e-10	16.5578	16.7783	23.5489	9.6629	10.5466	12.7214	18.9617	10.977
Creb5	-0.951363	1.21e-06	0.163835	0.176398	0.254175	0.0838571	0.129306	0.133996	0.198136	0.11572
Mboat1	-0.952626	0.000855218	0.19519	0.186315	0.21297	0.118554	0.14429	0.0881384	0.198158	0.116994
Trp53inp2	-0.953224	1.94e-05	41.5294	43.8849	57.1188	26.3352	34.7282	22.3256	47.5111	27.7963
Rnf112	-0.955045	2.64e-05	5.53241	5.4308	6.02486	2.63687	3.7536	3.57434	5.66269	3.3216
Usp6nl	-0.955579	1.21e-09	1.51442	1.40366	1.90044	0.811862	0.894739	1.09082	1.60617	0.932475
Meis1	-0.957688	0.00184143	0.102919	0.122976	0.143893	0.0844554	0.0701189	0.0595279	0.123263	0.0713674
Mettl7a1	-0.959877	0.036465	0.195533	0.231414	0.379256	0.104059	0.204139	0.156632	0.268734	0.154943
Prox1	-0.960719	1.81e-06	2.35836	2.20918	4.06334	1.23301	1.7225	1.94004	2.87696	1.63185
Tesk2	-0.962163	0.0047499	0.216941	0.175895	0.226746	0.0936916	0.174425	0.101884	0.206528	0.123334
Ell2	-0.963021	3.94e-08	1.918	2.02099	2.41441	0.892214	1.32416	1.52446	2.1178	1.24694
Ptpn13	-0.964171	2.31e-06	0.324565	0.350184	0.362633	0.154105	0.251836	0.203605	0.345794	0.203182
Aim2	-0.964194	0.0220301	0.031494	0.0422371	0.0976906	0.0221581	0.0198085	0.0575499	0.0571406	0.0331721
Smad7	-0.966502	7.3e-05	1.23568	1.26523	1.12478	0.558042	0.977052	0.612448	1.20856	0.715848
Pip4k2a	-0.967158	9.54e-07	1.14331	1.19391	1.99446	0.566531	0.937043	0.983739	1.44389	0.829104
Dhcr24	-0.967374	8.98e-08	22.9271	20.524	20.1614	10.4083	15.0723	11.5725	21.2042	12.3511
Scd1	-0.969072	4.33e-07	7.43678	8.08557	10.107	4.51604	5.52278	4.63971	8.54313	4.89284
Cdon	-0.972892	8.7e-05	0.240848	0.272754	0.3684	0.157289	0.172834	0.168862	0.294001	0.166329
Inpp5j	-0.973042	0.0410033	0.559055	0.526	0.761067	0.273889	0.50348	0.302808	0.615374	0.360059
Ppp2r2c	-0.977333	1.99e-06	0.969328	1.05408	1.32301	0.447526	0.809593	0.69775	1.11547	0.651623
Tmem88b	-0.978652	2.73e-08	132.231	138.131	170.648	64.6336	100.219	89.9953	147.003	84.9493
BC034090	-0.978697	0.0123744	0.180728	0.281723	0.410508	0.0967386	0.23584	0.169596	0.290986	0.167392
Dip2a	-0.978959	3.43e-09	3.60979	3.78295	4.63308	1.72371	2.53796	2.69894	4.00861	2.32021
Shroom3	-0.979827	0.000952461	0.033584	0.0425	0.0572053	0.0186536	0.0227042	0.0358017	0.0444298	0.0257198
Pdgfc	-0.98342	0.000205585	0.137741	0.122214	0.198033	0.0605113	0.098817	0.103032	0.152663	0.0874534
Entpd5	-0.987142	5.25e-10	3.90451	4.20515	5.2116	2.00283	2.58709	3.02989	4.44042	2.53994
Cpox	-0.987528	3.29e-08	4.00563	4.15521	4.62261	1.74597	2.72768	2.95403	4.26115	2.47589
Asah2	-0.989529	0.000921903	0.0905345	0.0989571	0.13673	0.0523244	0.0645692	0.0665507	0.108741	0.0611481
H1f2	-0.989566	0.000319413	19.6759	10.6889	25.738	15.5246	6.38127	9.9515	18.7009	10.6191
Srd5a1	-0.991344	2.44e-07	1.98366	2.21436	3.47634	1.03798	1.57109	1.70674	2.55812	1.4386
Insc	-0.992636	9.07e-05	0.334187	0.377393	0.464674	0.137707	0.314782	0.242832	0.392085	0.231774
Rab11fip4	-0.993584	0.00144822	0.197981	0.249621	0.346177	0.122347	0.215943	0.115637	0.264593	0.151309
Tle1	-0.994343	3.45e-05	0.383758	0.444049	0.410022	0.156909	0.316159	0.250811	0.41261	0.241293
Shtn1	-0.995464	0.00372931	0.132824	0.184106	0.246733	0.128695	0.100527	0.0835634	0.187888	0.104262
Gprc5b	-0.997651	5.78e-05	2.11773	2.39537	3.18278	1.07156	2.02702	1.33302	2.56529	1.4772
Apbb2	-0.998819	1.15e-07	0.591331	0.559733	0.891817	0.303426	0.410783	0.425173	0.68096	0.379794
Slc6a9	-0.998919	2.93e-05	1.56506	1.52959	1.9998	0.832316	1.24888	0.823604	1.69815	0.968265
Rassf8	-1.00095	1.21e-05	0.486282	0.518656	0.652832	0.228863	0.387026	0.330305	0.55259	0.315398
Slc48a1	-1.0014	1.46e-06	15.9407	15.5464	18.6762	6.56929	12.3002	10.2085	16.7211	9.69269
Fdps	-1.0041	0.0218601	1.16762	1.02224	0.743648	0.360255	0.605573	0.701754	0.977834	0.555861
Arrdc3	-1.00809	3.89e-07	4.85641	4.6041	8.36636	2.73065	3.14375	3.84952	5.94229	3.24131
Zfp536	-1.01141	5.77e-07	0.211422	0.19849	0.346677	0.103187	0.149507	0.165133	0.252196	0.139276
Adap1	-1.01327	0.000431564	0.725143	0.712276	0.7703	0.25897	0.66141	0.399362	0.735906	0.439914
Daam2	-1.0146	3.72e-07	0.965322	1.01118	1.5842	0.459723	0.758134	0.770362	1.1869	0.66274
Otud7b	-1.01886	7.73e-11	7.87493	8.37066	10.8337	3.70084	5.19222	6.38271	9.02642	5.09192
Olfml1	-1.02251	0.00733714	0.228754	0.308529	0.669199	0.0948259	0.254556	0.324843	0.402161	0.224741
Igf2bp2	-1.02259	0.00704856	0.0854685	0.0682323	0.0755116	0.0452283	0.0449617	0.0368294	0.0764041	0.0423398
Msmo1	-1.02479	6.79e-07	11.1886	11.6759	9.444	4.16441	7.16117	6.97651	10.7695	6.10069
Phlda3	-1.02638	0.000336442	12.1641	11.196	11.0376	5.02347	10.2704	4.8927	11.4659	6.72886
Mtf1	-1.02756	3.27e-08	1.98739	1.9924	2.66378	0.979215	1.36307	1.33427	2.21452	1.22552
Il23a	-1.03418	0.00261194	7.17532	7.44595	5.82671	2.04189	4.87428	4.95743	6.81599	3.95787
Omp	-1.0353	0.0109889	3.44223	4.62356	2.30988	1.58765	2.09937	1.86261	3.45855	1.84988
Plekhg3	-1.0356	7.02e-08	3.21387	2.98756	4.26291	1.31898	2.08889	2.45995	3.48811	1.95594
Ebp	-1.03843	1.46e-05	12.1998	11.1507	13.5557	4.52633	9.331	7.18797	12.3021	7.0151
Plat	-1.04061	6.1e-07	15.2133	12.6128	16.501	5.37834	8.15627	11.775	14.7757	8.43654
Aatk	-1.04082	1.22e-08	11.6115	11.5493	9.37559	4.69534	7.70964	5.69181	10.8455	6.03226
Aldh1a1	-1.04331	0.0132559	0.0350689	0.0555688	0.0487569	0.0276987	0.0260608	0.0214822	0.0464649	0.0250806
Tspan9	-1.04735	3.14e-08	1.06853	1.04067	0.841815	0.426102	0.678875	0.522482	0.983671	0.542486
Stmn4	-1.05024	1.03e-05	5.76746	5.93801	6.0962	2.01498	4.73128	3.49616	5.93389	3.41414
Tspan14	-1.05119	4.34e-05	0.549934	0.502889	0.583984	0.19856	0.363217	0.354342	0.545602	0.305373
Sis	-1.05151	0.0270033	0.0480581	0.0488392	0.10592	0.0165755	0.0303621	0.0731227	0.0676058	0.0400201
Thsd4	-1.05523	2.26e-06	0.0772953	0.0780491	0.104439	0.0359385	0.0569602	0.0489769	0.0865945	0.0472919
Sh3tc2	-1.05603	0.0328213	0.0775656	0.0669311	0.113563	0.0314389	0.0666287	0.0443469	0.0860199	0.0474715
Kndc1	-1.06241	1.19e-07	26.0399	24.0087	31.9628	9.51032	17.0964	19.2458	27.3371	15.2842
Sqor	-1.0642	0.00140015	0.232955	0.278361	0.241928	0.0907004	0.158657	0.166485	0.251081	0.138614
Nfe2l2	-1.06433	1.36e-05	1.30635	1.39158	1.71229	0.483152	1.03985	0.954077	1.47007	0.825693
Sema6a	-1.06449	7.18e-11	18.5678	16.7043	19.8718	7.90535	10.2985	11.8254	18.3813	10.0097
Prrg1	-1.06798	0.000164891	0.136419	0.143548	0.210007	0.0858002	0.0957919	0.0773973	0.163325	0.0863298
Ccnyl1	-1.06888	6.37e-08	1.78361	1.77391	2.12498	0.720759	1.02821	1.39329	1.89417	1.04742
Pcdh9	-1.06944	6.65e-10	0.780047	0.824188	1.34011	0.393032	0.554658	0.612017	0.98145	0.519902
Dnajb2	-1.07055	2.2e-07	12.0284	12.1445	10.4675	4.52162	8.22948	6.30173	11.5468	6.35094
Pla2g4a	-1.07275	1.6e-09	0.605985	0.621836	0.750169	0.264267	0.358523	0.456433	0.65933	0.359741
Cers2	-1.07347	8.98e-08	107.277	98.594	134.785	42.3061	74.869	69.2075	113.552	62.1275
Gss	-1.07509	1.18e-08	5.78023	4.85505	6.16887	2.44277	3.34696	3.23832	5.60138	3.00935
Arsg	-1.07538	6.12e-08	0.5947	0.639816	1.05423	0.263023	0.438049	0.531187	0.762915	0.410753
Rhou	-1.0779	2.73e-08	29.6031	26.3666	34.4605	11.2862	18.039	20.0329	30.1434	16.4527
Scd2	-1.07806	3.25e-10	421.839	418	363.974	169.19	260.577	220.936	401.271	216.901
Rab7b	-1.07875	2.38e-06	2.11237	2.18587	2.20426	0.740179	1.4216	1.44464	2.1675	1.20214
Plekha1	-1.08078	8.41e-11	15.3397	14.7228	23.1977	6.48445	9.2285	13.2188	17.7534	9.64392
Bcl2l1	-1.08144	2.67e-05	0.648916	0.633314	0.640431	0.242305	0.472822	0.342196	0.640887	0.352441
Itpk1	-1.08241	8.79e-09	0.738943	0.75774	1.03633	0.311916	0.503308	0.555117	0.844338	0.45678
Atp8b1	-1.08364	0.00048068	0.069232	0.0837435	0.164401	0.0321459	0.0598693	0.0745725	0.105792	0.0555292
Elovl1	-1.08486	9.11e-07	46.1296	42.1834	39.3832	15.2742	29.0752	25.6311	42.5654	23.3268
Secisbp2l	-1.09114	6.67e-12	35.2927	32.4109	47.3521	15.9929	20.186	24.8208	38.3519	20.3332
Elmsan1	-1.09374	5.24e-07	0.466522	0.467789	0.573496	0.205225	0.296352	0.301445	0.502602	0.267674
Fah	-1.09764	1.33e-05	1.45677	1.74194	1.71824	0.491286	1.14313	1.10019	1.63899	0.911535
Ninj1	-1.10521	8.33e-05	3.13012	3.3525	1.79817	1.0682	2.33669	1.06619	2.76026	1.49036
Gng8	-1.10607	0.00858482	1.90312	1.94958	1.86989	0.826219	1.42356	0.825343	1.90753	1.02504
Cldn14	-1.10832	0.0035925	0.147853	0.122366	0.11525	0.0404684	0.0797309	0.0880545	0.128489	0.0694179
1700001P01Rik	-1.11043	0.0290702	1.03909	1.21806	0.963501	0.348549	0.756903	0.628029	1.07355	0.577827
Igsf8	-1.11043	7.35e-07	2.21385	1.78293	2.41885	0.848987	1.40014	1.14392	2.13854	1.13102
Acsl1	-1.11391	1.32e-09	4.59904	4.89904	4.73443	1.73291	2.69197	3.21226	4.74417	2.54571
Ctsk	-1.1152	0.0024763	1.5876	1.3637	1.29875	0.405527	0.921705	0.998603	1.41668	0.775278
Ldb3	-1.11588	0.00420758	0.101003	0.114627	0.210219	0.0548064	0.0826788	0.0764299	0.14195	0.071305
Grb14	-1.12285	0.0181725	1.15174	1.11923	1.65919	0.445352	0.919134	0.728285	1.31005	0.69759
Epb41l3	-1.12314	3.1e-10	1.65825	1.74639	2.74378	0.772873	1.16409	1.22366	2.04947	1.05354
Tmem229a	-1.12348	0.028749	10.6587	15.7405	24.9906	7.25865	10.053	7.87306	17.1299	8.39489
Padi2	-1.12388	1.73e-06	2.07381	2.26542	2.62103	0.650483	1.59778	1.60912	2.32009	1.28579
Celsr1	-1.12431	0.0252395	0.0779529	0.0454224	0.0300342	0.02007	0.0413516	0.0173135	0.0511365	0.026245
E330034G19Rik	-1.12825	0.00229485	0.57979	0.473175	0.470099	0.226179	0.283693	0.27424	0.507688	0.261371
Tnni1	-1.12899	3.82e-05	1.66173	1.39302	1.72083	0.4901	1.09241	0.997644	1.59186	0.86005
B3galt5	-1.12969	2.6e-09	0.988731	0.96657	1.42314	0.389121	0.597035	0.794716	1.12615	0.593624
Stxbp6	-1.13124	8.81e-09	0.226277	0.235499	0.300038	0.101953	0.146848	0.14505	0.253938	0.131284
Col6a2	-1.13139	0.00175493	0.551461	0.707855	0.702428	0.158158	0.684407	0.326999	0.653914	0.389855
Nkain2	-1.13213	1.03e-08	0.120166	0.123285	0.191132	0.0472521	0.0860946	0.0944266	0.144861	0.0759245
Fam171a1	-1.13221	6.73e-07	0.557994	0.472653	0.653721	0.235554	0.353141	0.281804	0.561456	0.290166
Tmem151a	-1.133	0.0236279	12.4101	11.7199	12.1304	4.08974	9.2984	6.29316	12.0868	6.56043
Itgad	-1.13678	0.00324034	0.15315	0.131014	0.219257	0.0400882	0.106765	0.129064	0.167807	0.0919724
Etnk2	-1.13739	0.0193471	0.344692	0.263284	0.304227	0.129153	0.181433	0.157238	0.304068	0.155941
Ank3	-1.14329	9.17e-11	2.81545	2.60999	4.26218	1.2589	1.73607	1.90478	3.22921	1.63325
Tmem125	-1.14454	0.0215554	42.7316	37.9692	37.5367	12.6841	24.8929	25.2417	39.4125	20.9396
Dnajc6	-1.14605	1.46e-06	0.364205	0.372212	0.715795	0.147067	0.292621	0.298328	0.484071	0.246005
Xrcc3	-1.14683	0.0321729	10.2099	10.55	12.3164	3.17092	8.3827	6.5575	11.0254	6.03704
Acy3	-1.14767	0.0120044	1.44873	1.83453	2.20399	0.494956	1.45647	1.00797	1.82908	0.986464
Grm4	-1.14825	0.000255393	0.157071	0.142824	0.137101	0.0577896	0.100473	0.0684549	0.145665	0.0755724
Slco3a1	-1.14943	1.65e-07	0.323909	0.354354	0.472513	0.163032	0.250867	0.173346	0.383592	0.195748
Cyp3a13	-1.1512	0.00665152	0.126429	0.131877	0.509819	0.0781693	0.0817279	0.189023	0.256042	0.116307
Sc5d	-1.15359	1.79e-11	16.3768	17.6152	19.9868	6.47993	10.1597	11.3376	17.993	9.32576
Pde8a	-1.15386	1.14e-05	0.207387	0.262919	0.671639	0.0812022	0.215346	0.271516	0.380648	0.189355
Sytl2	-1.15781	3.26e-10	2.37577	2.28703	4.6985	1.00233	1.53467	2.14133	3.12043	1.55945
Vps37a	-1.15958	2.85e-15	8.09612	8.79398	10.1781	3.71212	4.21419	5.93627	9.02272	4.62086
Tshb	-1.16057	0.000529852	1.21199	1.01836	2.04746	0.458431	0.585344	1.18374	1.42594	0.742503
Mag	-1.16077	7.54e-08	138.065	128.029	119.556	42.9756	87.3765	71.6038	128.55	67.3186
Birc2	-1.16173	1.59e-09	7.372	6.30723	5.94848	2.70108	3.82138	3.4104	6.54257	3.31095
Emilin2	-1.16214	6.88e-05	0.290886	0.284658	0.359918	0.126708	0.205547	0.144817	0.311821	0.159024
Ptprb	-1.16283	4.24e-09	1.18619	1.15347	1.04398	0.424568	0.588016	0.725303	1.12788	0.579295
Atp8a1	-1.16437	7.18e-11	1.52626	1.4975	2.35247	0.833641	0.8846	0.925255	1.79208	0.881165
Arrdc2	-1.16903	0.000201952	3.11982	3.15882	4.14948	1.179	2.40157	1.78808	3.47604	1.78955
Fads6	-1.17033	1.12e-05	0.889325	1.09343	1.08504	0.480044	0.618167	0.442499	1.0226	0.51357
Rnf130	-1.17115	1.61e-09	1.65604	1.71135	1.77241	0.577787	1.01892	1.06096	1.71327	0.88589
Gas7	-1.17165	1.26e-10	2.47861	2.45636	3.35517	0.921737	1.56818	1.76582	2.76338	1.41858
Gpr62	-1.17343	4.28e-07	19.5057	18.325	25.9619	7.70908	12.6988	11.7771	21.2642	10.7283
Fgd3	-1.1826	1.34e-08	0.41744	0.473701	0.695671	0.193455	0.243726	0.35633	0.528937	0.264504
Slc12a2	-1.18396	8.47e-15	19.2357	18.6699	26.4682	7.88655	9.71365	15.116	21.4579	10.9054
Efnb3	-1.18556	4.51e-09	43.1705	41.656	52.8553	15.1792	28.5783	26.5867	45.8939	23.4481
Zdhhc9	-1.18824	5.08e-09	16.7534	14.8039	21.4503	5.91637	10.5	10.3657	17.6692	8.92736
Pfkp	-1.18914	1.64e-12	2.33298	2.36906	3.56806	1.25946	1.26898	1.48968	2.7567	1.33938
Kcnk13	-1.18937	8.86e-05	0.116455	0.147705	0.126806	0.0448913	0.0780913	0.0736381	0.130322	0.0655402
Pon2	-1.18989	1.59e-11	2.07847	2.26842	3.18516	1.07509	1.219	1.38297	2.51068	1.22569
Mtus1	-1.1924	3.07e-08	0.535041	0.561347	0.763601	0.195464	0.389568	0.359129	0.619996	0.31472
Jcad	-1.19445	1.05e-08	3.04218	2.79286	4.01799	1.0602	1.92245	1.99302	3.28434	1.65856
Ctps	-1.20265	5.33e-10	2.80192	2.81115	2.06198	1.11126	1.71292	0.995648	2.55835	1.27328
Spef2	-1.2046	0.0200732	0.0147671	0.0226936	0.0457015	0.0113264	0.00965289	0.0172093	0.0277207	0.0127295
Lpar6	-1.20601	0.000551495	1.49155	1.81852	2.43104	0.529922	1.20886	1.1578	1.9137	0.965528
St6galnac3	-1.20614	4.89e-09	0.18095	0.192149	0.286676	0.064278	0.128196	0.140074	0.219925	0.11085
Cd82	-1.20753	0.000477523	0.178711	0.22504	0.304917	0.0597122	0.14104	0.160789	0.236223	0.120514
Rcbtb1	-1.20786	8.23e-12	4.50439	4.34938	6.78745	2.1253	2.58341	2.81357	5.21374	2.50743
Micall1	-1.21058	8.42e-11	4.82524	5.13071	6.77371	1.92472	3.24047	3.09835	5.57655	2.75451
Coro2b	-1.21092	3.41e-08	1.40461	1.2605	1.61739	0.441383	0.857618	0.866192	1.4275	0.721731
Slc24a2	-1.21142	3.3e-09	0.552214	0.628171	1.20376	0.22977	0.438571	0.478633	0.794715	0.382325
Ston2	-1.21307	6.37e-08	0.159044	0.20522	0.297826	0.0870907	0.111742	0.11536	0.220697	0.104731
Tmem182	-1.21516	0.00272157	0.190581	0.151045	0.150628	0.0542784	0.103785	0.085172	0.164084	0.0810784
Cyp51	-1.21537	8.41e-11	31.3705	31.1472	26.3191	10.5368	17.0462	16.2904	29.6123	14.6245
Wnt3	-1.21814	2.09e-05	0.457462	0.419462	0.479382	0.148272	0.27483	0.251002	0.452102	0.224701
Adamts4	-1.21961	1.37e-11	85.7401	92.6852	91.5047	29.6329	50.4456	54.8921	89.9767	44.9902
Hs3st1	-1.22002	8.02e-06	0.302281	0.277468	0.400599	0.108171	0.230111	0.152711	0.326783	0.163664
Gk5	-1.22085	0.000587734	0.124366	0.173949	0.227603	0.0746638	0.104887	0.0704115	0.175306	0.0833209
4933428G20Rik	-1.22243	0.00680914	0.347338	0.70688	0.816166	0.250821	0.245321	0.378257	0.623461	0.291466
Gpr176	-1.22575	4.68e-07	0.329993	0.317993	0.234405	0.113208	0.170407	0.14154	0.29413	0.141718
Igsf3	-1.22781	7.18e-11	0.632771	0.750139	0.698751	0.250929	0.393566	0.371412	0.693887	0.338636
Plekhh2	-1.22878	2.17e-05	0.163379	0.182205	0.338121	0.100302	0.109783	0.101789	0.227902	0.103958
Evi2a	-1.23159	1.42e-10	16.9129	20.1996	28.6371	6.26396	12.0346	14.2106	21.9165	10.8364
Sypl	-1.23207	8.41e-11	4.50232	4.65135	7.28667	1.80145	2.93782	3.1814	5.48011	2.64023
Hmgcs1	-1.23244	1.65e-11	58.0965	53.7399	58.8733	20.0352	31.961	31.5807	56.9032	27.859
Fam214a	-1.24093	1.43e-09	2.73206	2.13576	4.32002	1.00271	1.48334	1.84345	3.06261	1.44317
Cemip2	-1.24388	6.65e-10	10.8536	10.8134	7.61651	3.43055	5.22807	5.34975	9.76116	4.66946
Tspan2	-1.24625	4.76e-12	49.8532	49.2682	105.95	18.6284	30.9506	48.4207	68.3572	32.6666
Nudt4	-1.24879	1.35e-09	15.8138	15.2464	24.0901	5.4095	10.4778	10.9284	18.3834	8.93856
Neurog2	-1.25219	0.0341911	1.57622	1.55178	1.86301	0.526657	0.431577	1.90092	1.66367	0.953051
Piezo2	-1.26065	3.94e-06	0.0564222	0.043727	0.0555091	0.0186663	0.02555	0.029568	0.0518861	0.0245948
Gm10277	-1.26288	0.0309128	1.39345	1.60989	1.86358	0.404493	1.16014	0.853586	1.62231	0.806072
Endod1	-1.26618	1.48e-09	5.41294	5.05419	7.95337	1.95864	3.4749	3.29255	6.14017	2.9087
Prr18	-1.27782	9.79e-11	13.4789	13.7807	21.416	5.76398	8.49446	8.16056	16.2252	7.473
Clgn	-1.28105	1.32e-14	3.79942	3.88848	5.01945	1.68903	2.07533	2.1084	4.23578	1.95759
Ccp110	-1.28301	1.38e-14	8.70391	10.0595	21.0458	3.73483	5.62398	8.71856	13.2697	6.02579
Adamts2	-1.28335	0.00217901	0.0338042	0.034191	0.0430686	0.0120416	0.0252859	0.0157597	0.0370212	0.0176957
Apod	-1.28355	0.0100415	37.0829	42.7732	51.2671	10.3054	29.2014	26.6685	43.7077	22.0584
Plin3	-1.28539	0.00144134	0.578912	0.707872	0.7258	0.135597	0.555586	0.352179	0.670862	0.347788
Ttc12	-1.28867	0.0213384	0.0761199	0.0822823	0.155294	0.0204058	0.0836094	0.0519798	0.104565	0.0519983
Plp1	-1.29176	3.96e-13	1146.18	1277.28	2333.66	443.183	781.594	963.173	1585.71	729.317
Jakmip3	-1.29272	6.65e-10	0.398238	0.464691	0.668086	0.129014	0.274701	0.333853	0.510338	0.245856
Inf2	-1.29411	1.05e-10	2.78053	3.69076	5.08728	0.984874	2.28394	2.23353	3.85286	1.83411
Ldlrap1	-1.29986	4.15e-09	2.06224	1.82397	2.56709	0.689416	1.14666	1.16369	2.1511	0.999922
Trim59	-1.3001	1.94e-06	1.77268	2.49284	2.81244	0.522746	1.4993	1.4399	2.35932	1.15398
Tmtc1	-1.30054	1.27e-11	0.435901	0.398618	0.606847	0.151763	0.227503	0.291004	0.480455	0.223423
Fth1	-1.30268	0.00504653	341.268	341.946	386.955	114.648	243.521	155.094	356.723	171.088
Arhgef37	-1.30579	0.0186883	0.0629266	0.0681523	0.146874	0.0240906	0.0493535	0.0502788	0.092651	0.0412409
Fgd6	-1.30763	2.9e-06	0.143367	0.142522	0.190696	0.0594062	0.0851922	0.0723245	0.158861	0.0723076
Muc1	-1.30883	0.000443367	1.10889	1.83317	2.96604	0.518604	1.02581	1.07988	1.96937	0.874762
Cyp27a1	-1.31084	4.29e-08	1.08445	1.28901	1.1689	0.362494	0.703541	0.588428	1.18079	0.551488
Erp27	-1.31138	0.0276177	0.181908	0.212027	0.282471	0.057205	0.123586	0.136757	0.225469	0.105849
Tmem63a	-1.3146	1.05e-10	6.7198	7.17458	9.41174	2.0719	4.44186	4.55764	7.76871	3.69047
Dnah14	-1.31779	0.0466179	0.0084802	0.00677782	0.0191253	0.00323247	0.00344357	0.00913013	0.0114611	0.00526872
Map7	-1.32462	6.98e-13	1.49342	1.49676	2.56015	0.539053	0.886802	1.08964	1.85011	0.838499
Deptor	-1.32544	1.04e-07	0.104578	0.120138	0.185264	0.0431475	0.0625231	0.0784111	0.13666	0.0613606
Acss2	-1.32864	1.44e-09	2.03711	2.08257	2.05274	0.563604	1.18736	1.15787	2.05747	0.96961
Tenm4	-1.33044	1.27e-11	0.12995	0.127958	0.20812	0.0503765	0.0769109	0.0804179	0.155343	0.0692351
Man1a	-1.33774	8.96e-10	0.958808	0.940469	1.51683	0.270017	0.588576	0.754774	1.1387	0.537789
Lmod1	-1.33958	4.99e-05	0.250108	0.214475	0.256603	0.0875897	0.109862	0.125353	0.240395	0.107602
Mast3	-1.34323	1.02e-12	10.5272	11.0082	14.381	3.76911	6.65249	5.82381	11.9721	5.41514
BC049715	-1.34546	0.000431564	0.457412	0.331667	0.926293	0.177951	0.165268	0.421741	0.571791	0.254987
Chdh	-1.35176	0.043044	0.0663428	0.0600426	0.157125	0.0343626	0.0382157	0.0430303	0.0945034	0.0385362
Gjb1	-1.35343	0.0384855	3.24274	3.60262	3.55101	0.877655	2.97273	1.36769	3.46546	1.73936
Clic4	-1.35346	5.58e-11	4.79286	4.38246	6.07579	1.45072	2.7319	2.75423	5.0837	2.31228
Litaf	-1.35667	1.04e-11	1.15891	1.26413	2.35426	0.451443	0.772491	0.84415	1.59244	0.689362
Calr3	-1.37825	0.0226019	0.15919	0.187523	0.140908	0.0588953	0.0933078	0.0611862	0.162541	0.0711298
Ndrg1	-1.38313	0.01599	2.78838	3.5452	4.5441	0.721056	2.58667	1.94249	3.6259	1.75007
Sorl1	-1.38426	6.05e-13	1.17801	1.1944	1.5087	0.373116	0.678618	0.671587	1.2937	0.57444
Plau	-1.38562	0.00681371	1.11519	1.51353	0.680306	0.160975	0.829171	0.571144	1.10301	0.52043
Tmem123	-1.3921	4.59e-11	3.91661	4.07973	6.19726	1.18699	2.5081	2.61799	4.7312	2.10436
Dcst1	-1.39236	0.0121444	0.118578	0.2097	0.424044	0.0565772	0.0927261	0.165313	0.250774	0.104872
Myo1d	-1.39487	1.2e-10	0.459962	0.43662	0.593162	0.130304	0.268225	0.266212	0.496581	0.22158
Gpr37	-1.39982	0.0051247	7.91318	8.10826	12.048	1.96029	5.0563	6.0187	9.35647	4.3451
Stmn1	-1.40286	0.000683929	1.70293	1.36997	1.67031	0.42002	0.986682	0.695445	1.58107	0.700715
Adamtsl1	-1.40414	0.000161672	0.00779994	0.0111336	0.0159976	0.00338326	0.0071391	0.00436612	0.0116437	0.00496283
Bag3	-1.40625	0.000307145	0.255203	0.4125	0.272848	0.0893555	0.200687	0.119262	0.313517	0.136435
Ptprd	-1.40628	3.94e-17	0.511656	0.535044	0.949137	0.19155	0.284413	0.366659	0.665279	0.280874
Tppp3	-1.40808	0.0249744	19.8303	22.0219	26.8724	5.04256	17.0159	10.5322	22.9082	10.8635
Rhpn2	-1.41326	9.3e-05	0.149136	0.156534	0.197442	0.0518883	0.0959441	0.0686792	0.167704	0.0721705
Frmpd2	-1.41643	0.00543355	0.0421398	0.0443537	0.0441723	0.0164248	0.0128477	0.0283586	0.0435553	0.0192104
Spock3	-1.41783	3.2e-07	0.0413254	0.0465799	0.0746142	0.0163755	0.0280866	0.0233675	0.0541732	0.0226099
Hapln2	-1.44416	0.0122898	4.80566	6.79464	8.24201	1.28589	4.97539	2.98255	6.6141	3.08128
Depdc1b	-1.44432	0.000236166	0.112257	0.103422	0.12302	0.024521	0.0706757	0.0543535	0.112899	0.0498501
Heg1	-1.45069	9.79e-11	0.827565	0.866605	1.2161	0.262463	0.540605	0.429218	0.970091	0.410762
Fam178b	-1.45754	0.039912	0.0229582	0.0239222	0.024276	0.00385053	0.0184063	0.0106258	0.0237188	0.0109609
Gpr15	-1.45947	0.00231692	3.75519	4.0168	3.39039	0.850251	1.43221	2.66837	3.72079	1.65028
Thbs3	-1.45948	3.46e-08	2.9373	2.17133	4.47805	0.815909	1.43506	1.67333	3.19556	1.3081
D7Ertd443e	-1.46019	9.14e-07	0.0624176	0.0650554	0.133509	0.0174112	0.0425343	0.0489539	0.0869939	0.0362998
Itgb4	-1.46417	3.6e-07	0.840839	1.01292	1.20391	0.222549	0.723846	0.422339	1.01923	0.456245
Cd59a	-1.4735	0.000137175	0.304957	0.617301	0.410428	0.0870027	0.359719	0.150217	0.444229	0.198979
Gng11	-1.49219	8.34e-06	1.94936	2.93573	2.03152	0.681133	1.45123	0.729741	2.30553	0.954034
Gm12689	-1.49372	0.0184283	1.53907	1.92355	3.92126	0.797171	1.0732	0.887335	2.4613	0.919236
Plekhh1	-1.50329	0.00372931	5.54976	5.58552	9.53158	1.43921	3.7156	3.49217	6.88895	2.88233
Galnt6	-1.50398	1.03e-10	1.99819	2.22532	2.41597	0.467293	1.12517	1.24508	2.21316	0.94585
Car2	-1.50763	0.00415926	10.6051	12.2155	19.4163	2.8003	8.24361	6.83148	14.079	5.95846
Ctnna3	-1.52544	0.00181038	0.00152356	0.00263316	0.00519526	0.000589683	0.0012886	0.00167513	0.00311733	0.00118447
Ttll7	-1.5268	0.00129581	1.25801	1.26448	2.73871	0.38533	0.812516	0.839273	1.75374	0.679039
Angpt4	-1.52725	0.0262772	0.0450321	0.0712642	0.131862	0.0203924	0.0408487	0.0308957	0.0827195	0.0307122
Myh6	-1.54494	6.51e-06	0.361371	0.500699	0.590866	0.10823	0.29648	0.183719	0.484312	0.196143
Adssl1	-1.54572	3.14e-08	1.63523	1.27623	1.8825	0.344637	0.719422	0.876262	1.59799	0.646774
Adam19	-1.54647	2.17e-14	0.983818	1.13295	1.49836	0.310653	0.608331	0.505376	1.20504	0.474787
9930012K11Rik	-1.54669	0.017614	0.506542	0.371117	0.824025	0.151708	0.211343	0.280741	0.567228	0.214598
S1pr5	-1.55242	0.00230666	20.5501	21.4318	18.1163	4.47373	11.846	8.42858	20.0327	8.24943
Gp2	-1.55306	0.000382609	0.50285	0.430262	0.331387	0.124659	0.264843	0.116917	0.4215	0.168806
Cntn3	-1.55588	3.28e-11	0.0489748	0.0542059	0.0847869	0.0171439	0.0248556	0.0297253	0.0626559	0.0239082
Ldlr	-1.56436	6.84e-13	5.16689	5.25746	4.50528	1.2402	2.67739	2.0113	4.97654	1.9763
Tsc22d3	-1.5663	4.99e-08	0.519888	0.505404	0.558235	0.118902	0.324442	0.203278	0.527842	0.215541
Tex52	-1.568	5.49e-05	0.564724	0.790297	1.33156	0.143669	0.451303	0.466428	0.895528	0.3538
Ccdc187	-1.57046	2.67e-05	0.131156	0.165735	0.23636	0.039353	0.0917839	0.0751828	0.17775	0.0687732
Piga	-1.57138	7.68e-14	4.76413	4.62203	7.18213	1.2095	2.11682	3.29949	5.52276	2.2086
Nipal4	-1.57289	0.00403578	8.5344	8.02938	7.68685	1.76535	4.50219	3.55368	8.08354	3.27374
Trf	-1.57348	0.017544	4.82844	4.65654	4.67143	0.964998	3.15354	1.86551	4.7188	1.99468
Crybg3	-1.57567	1.03e-13	0.310698	0.390694	0.598217	0.113669	0.18572	0.185883	0.433203	0.161757
Rftn1	-1.57804	5.37e-06	0.0697083	0.0735431	0.0903412	0.0148091	0.0482227	0.0326428	0.0778642	0.0318915
Kcnj2	-1.59051	1.75e-05	0.80179	0.929744	1.5483	0.232187	0.606483	0.416951	1.09328	0.41854
Cnmd	-1.59268	7.89e-06	0.419359	0.349557	0.306377	0.129508	0.150131	0.119983	0.358431	0.133207
Fam186a	-1.59435	0.036856	0.0265006	0.0443784	0.0908394	0.00158737	0.0325199	0.0386512	0.0539061	0.0242528
Gsn	-1.59534	0.00104254	17.8097	16.6032	17.7951	3.79933	9.74496	7.33651	17.4027	6.96027
Unc5b	-1.60801	0.000659833	2.97525	2.93122	3.85616	0.679239	1.65147	1.50979	3.25421	1.28016
Klhl4	-1.61463	6.87e-12	0.483985	0.560263	1.14891	0.155552	0.313546	0.318678	0.731053	0.262592
Casr	-1.6216	3.33e-18	2.70068	2.45965	3.02765	0.733206	1.11558	1.20157	2.72933	1.01678
Fnbp1	-1.62597	8.36e-05	2.89415	3.03668	5.40088	0.80663	1.72036	1.67402	3.77724	1.40034
Myo5c	-1.63105	0.000891404	0.0527402	0.0576533	0.0980525	0.0105304	0.0284766	0.0420506	0.069482	0.0270192
Ppp1r14a	-1.63343	3.03e-05	1.806	1.90455	2.58739	0.413046	1.15646	0.83811	2.09932	0.802539
Fam83d	-1.66925	3.54e-07	0.692825	0.602315	0.780586	0.204322	0.317785	0.21931	0.691909	0.247139
Slc45a3	-1.66972	0.00693873	1.61656	1.62119	1.51862	0.30154	0.966229	0.59491	1.58546	0.620893
Plaat3	-1.67088	0.000285987	2.72301	3.19317	5.17281	0.68903	1.8366	1.58203	3.69633	1.36922
Onecut2	-1.6747	3.9e-16	0.667489	0.661895	1.53405	0.183906	0.298291	0.538591	0.954477	0.340263
Apln	-1.67522	1.43e-09	1.98217	2.12499	2.9747	0.541685	1.13584	0.87672	2.36062	0.851416
Opalin	-1.6889	0.00415926	11.3782	9.85957	16.9206	2.17373	5.75939	6.43455	12.7195	4.78922
Plag1	-1.7039	0.000638395	0.0821232	0.108301	0.172338	0.0206604	0.0406331	0.0704288	0.120921	0.0439074
Nod1	-1.71478	8.42e-14	0.717514	0.827398	0.782946	0.171612	0.351576	0.303337	0.775952	0.275508
Trim36	-1.71605	1.38e-14	1.81142	1.90787	2.46056	0.389023	0.897435	0.961566	2.05995	0.749341
Ypel2	-1.71843	0.000324871	2.33411	2.50026	4.3928	0.511616	1.37059	1.4686	3.07572	1.11693
Anln	-1.71861	3.04e-16	2.63303	3.74789	5.52905	0.731656	1.9328	1.54772	3.96999	1.40406
Myo1e	-1.72593	6.39e-15	0.324908	0.328158	0.501264	0.0827845	0.163341	0.154996	0.384777	0.133707
Synj2	-1.72595	0.000113598	0.864708	0.895419	1.49696	0.207182	0.487806	0.454756	1.0857	0.383248
Cdh19	-1.74479	1.6e-06	0.0812672	0.103943	0.208387	0.0155937	0.0575031	0.0666573	0.131199	0.0465847
Mobp	-1.75065	0.000426839	235.943	232.594	354.52	50.2201	127.918	114.276	274.352	97.4713
Cdc42ep2	-1.75213	0.0330429	4.81467	4.75888	4.63241	0.783364	3.51341	1.45211	4.73532	1.91629
Prob1	-1.78464	0.00840228	0.528308	0.46079	0.798046	0.189873	0.246357	0.138697	0.595715	0.191642
BC028528	-1.79321	2.47e-05	0.946787	0.872671	1.31352	0.163276	0.503714	0.411595	1.04433	0.359528
Aspa	-1.81441	0.00282629	3.68525	4.66412	9.28825	0.747988	2.84326	2.50083	5.8792	2.03069
Cldn11	-1.83873	2.01e-06	222.515	189.819	229.924	45.2766	83.1355	80.4261	214.086	69.6127
Prr5l	-1.85177	1.66e-14	0.297268	0.342703	0.494697	0.0627799	0.168607	0.141929	0.378222	0.124439
Sec14l5	-1.86725	7.48e-05	2.45663	2.83266	5.22142	0.567976	1.461	1.29953	3.50357	1.1095
Efhd1	-1.8714	0.000757132	0.462935	0.779118	1.56696	0.0931714	0.430836	0.408356	0.936337	0.310788
Carns1	-1.88435	4.18e-16	3.40014	4.22316	7.96066	0.852626	1.92568	1.96468	5.19465	1.58099
Ermn	-1.88964	0.000273534	60.608	77.7337	146.548	12.0513	40.9657	39.6919	94.9631	30.903
Sspo	-1.90152	8.56e-07	0.171591	0.161392	0.4569	0.0350015	0.105169	0.0923279	0.263294	0.0774995
Il12rb1	-1.90733	2.61e-11	1.93774	2.01324	1.70522	0.321817	0.776504	0.679119	1.8854	0.59248
Naaa	-1.95201	9.17e-11	0.818194	0.922228	1.26153	0.128179	0.37999	0.436946	1.00065	0.315038
Dcst2	-1.95252	0.00340101	0.0907838	0.0925392	0.438236	0.0148951	0.0488242	0.111223	0.207186	0.0583141
Dapk2	-1.95604	2.75e-05	0.0447488	0.0418701	0.0539391	0.0142418	0.0144494	0.0118895	0.0468527	0.0135269
Slc35g2	-1.99618	0.000122364	0.201634	0.171554	0.309495	0.0409087	0.0569895	0.0996093	0.227561	0.0658358
Cyp2j12	-2.05381	0.00231202	0.452587	0.583506	1.03804	0.0591485	0.287791	0.307846	0.691379	0.218262
Sp7	-2.09156	3.61e-08	1.2613	1.04759	1.83673	0.160851	0.563197	0.448628	1.38187	0.390892
Dock5	-2.1785	8.01e-05	0.191903	0.263807	0.376025	0.041796	0.116731	0.0602311	0.277245	0.0729193
Ankub1	-2.19057	2.2e-07	0.157996	0.183173	0.31351	0.0262076	0.0751668	0.0638134	0.218226	0.0550626
Mal	-2.1982	0.000387903	127.01	142.472	291.407	17.2483	65.9684	69.1673	186.963	50.7947
Pdk4	-2.25967	0.000958527	0.142319	0.180735	0.40516	0.0238696	0.0880214	0.0581205	0.242738	0.0566705
Lama2	-2.27318	1.57e-13	0.0342089	0.0281608	0.05522	0.0045932	0.0116881	0.0118904	0.0391966	0.00939058
Mgp	-2.50687	1.1e-05	24.6216	20.6578	41.5295	2.96704	7.68692	7.26895	28.9363	5.9743
Cxcl12	-2.78484	1.87e-05	1.91143	1.53729	4.09723	0.204884	0.533314	0.487137	2.51532	0.408445

## Sheet: OPC
gene	log2FoldChange	padj	OPC_ctrl_1	OPC_ctrl_2	OPC_ctrl_3	OPC_pdibot_1	OPC_pdibot_2	OPC_pdibot_3	ctrl_average	pdibot_average
Ptgds	1.67872	1.79e-12	10.3434	19.5413	4.98799	32.6224	57.5977	22.1755	11.6242	37.4652
Hmgcs1	-1.32844	3.25e-06	24.2473	28.556	47.1151	10.1203	14.5356	17.616	33.3061	14.0906
Cers2	-1.51856	1.18e-05	60.398	72.8826	183.488	21.5952	41.5692	48.1446	105.59	37.103
Map7	-1.53195	3.23e-05	0.51735	0.530153	1.65156	0.168365	0.315697	0.447424	0.899689	0.310495
Plaat3	-1.59006	0.000128209	1.37745	1.85773	4.73427	0.556952	1.02276	0.970438	2.65648	0.850051
Rab7b	-1.65908	0.000293426	0.706181	0.846187	2.00892	0.141891	0.562311	0.581672	1.1871	0.428624
Ccp110	-1.43892	0.000327913	3.11691	4.60661	13.3879	1.41496	2.71061	3.12569	7.03714	2.41708
Fam214a	-1.32699	0.000378888	1.3676	1.33438	3.92296	0.606455	0.82488	1.13826	2.20831	0.856531
Desi1	-1.38901	0.000475187	4.79308	4.74241	9.04163	1.64944	3.46176	2.551	6.19237	2.55407
D16Ertd472e	-1.32003	0.000503079	0.537183	0.666014	1.36413	0.25432	0.334186	0.47262	0.855776	0.353709
Mgp	-3.49374	0.000615489	17.4441	23.8238	76.0647	0.665028	5.85751	7.20445	39.1109	4.57566
H2bc4	-1.3857	0.000773145	3.37437	4.14799	5.88866	1.04846	2.75968	1.99347	4.47034	1.93387
Cnmd	-1.56951	0.00101504	0.458904	0.404017	0.412164	0.193766	0.126229	0.150967	0.425028	0.156988
Pdgfc	-1.22796	0.00147374	0.113201	0.1057	0.187779	0.0567475	0.0518038	0.0759668	0.13556	0.061506
Plpp2	-1.34986	0.00151948	2.86235	2.51472	7.46834	0.998136	1.66871	2.48527	4.2818	1.71737
Clgn	-1.09945	0.00197868	2.51466	2.8318	3.89069	1.65838	1.44313	1.4752	3.07905	1.52557
Slc17a7	0.969341	0.00208477	5.42793	6.97725	1.53906	8.00422	14.5639	4.72974	4.64808	9.09928
Cstb	-0.956351	0.00351013	24.5509	28.883	33.4	11.8403	17.4748	19.6712	28.9446	16.3288
Polr3e	-1.18823	0.00407287	1.61232	1.67983	3.10204	0.774909	1.14494	1.00456	2.1314	0.974802
Ctsl	-0.844899	0.00626415	40.3117	42.0352	54.3756	20.0978	29.3742	33.938	45.5742	27.8033
Plau	-2.4157	0.00626415	0.363148	0.473609	0.659385	0.0352669	0.112321	0.178921	0.498714	0.108836
Msmo1	-0.943794	0.00675554	5.32025	6.55945	9.26651	3.31823	4.02721	4.27726	7.04874	3.87423
Pycr1	1.24691	0.00716927	0.990163	0.967472	0.885384	1.41295	3.23869	3.0295	0.947673	2.56038
Jcad	-1.06012	0.00974726	2.07114	2.04865	4.55572	0.82778	1.72562	1.90012	2.89184	1.48451
Tubb4a	-1.04607	0.0115672	349.582	375.219	987.854	137.335	338.556	405.838	570.885	293.909
Kmt5a	-0.974984	0.0119459	3.39402	3.64435	5.76666	1.89711	2.58681	2.40425	4.26835	2.29605
H1f2	-1.24168	0.0133624	11.7487	11.344	27.2894	7.37828	6.5189	7.16676	16.794	7.02132
Ly6a	-1.59953	0.0136218	1.21308	1.43503	5.60342	0.375983	0.892649	1.36249	2.75051	0.877041
Vps37a	-0.883429	0.0147603	2.87407	3.33769	5.39371	2.06902	1.97863	2.53159	3.86849	2.19308
Kcnj4	1.76544	0.0161027	0.0756311	0.132381	0.0208976	0.198312	0.405116	0.139737	0.0763031	0.247721
Fkbp9	-0.815362	0.0164485	2.78644	2.60138	3.58838	1.4742	1.87718	2.17323	2.99206	1.84153
Tmem268	-1.07349	0.0166062	0.454615	0.495433	1.48687	0.262318	0.291349	0.613989	0.812304	0.389219
Pdgfrl	2.1109	0.019193	0.00882473	0.0129801	0.0139335	0.0514206	0.0701862	0.0465846	0.0119128	0.0560638
Elovl6	-0.888117	0.0217493	1.90437	2.04448	4.36252	1.23568	1.44273	1.88184	2.77045	1.52008
Cntnap1	0.899789	0.0225319	0.959088	1.23644	0.324496	1.41473	2.38289	0.935999	0.840007	1.57787
Tex52	-2.03524	0.0250186	0.260484	0.224941	1.10781	0.0122404	0.148848	0.283884	0.531078	0.148324
H4c4	0.902196	0.0263075	18.9732	24.4741	4.18267	39.0069	32.0695	13.1527	15.8766	28.0764
Tenm2	0.742422	0.0263793	0.0487384	0.051	0.0207545	0.0707087	0.0912188	0.0470522	0.0401643	0.0696599
BC049715	-2.1386	0.0273623	0.143628	0.102874	0.542289	0.0272902	0.0474086	0.0988946	0.26293	0.0578645
Kcnh3	1.08189	0.032798	0.312819	0.476123	0.178954	0.58117	1.13199	0.473861	0.322632	0.729005
Ccn3	1.09768	0.0329299	0.839736	0.894765	0.31605	1.70687	2.21565	0.752556	0.683517	1.55836
Camk2a	0.785292	0.0372669	2.89907	4.12823	2.53533	3.8211	10.1454	5.05363	3.18754	6.34003
Shank3	0.841563	0.0388027	0.492692	0.504518	0.225744	0.619932	1.07581	0.605214	0.407652	0.766987
Tnfaip6	-1.02271	0.0400024	0.671224	0.861635	1.61379	0.412701	0.540467	0.639637	1.04888	0.530935
Atg3	-0.675297	0.042348	3.83867	3.72417	2.82742	2.49103	2.41874	2.07116	3.46342	2.32698
Slc16a1	-0.768711	0.042348	2.10978	2.19344	2.23376	1.58161	1.13095	1.47629	2.17899	1.39628
Prob1	-1.81716	0.043718	0.666303	0.737488	1.68325	0.169858	0.533949	0.246213	1.02902	0.316673
Epb41l3	-0.937204	0.0437947	1.10044	1.18036	2.38195	0.734841	0.923781	0.801285	1.55425	0.819969
Plppr4	0.699254	0.0452907	1.71249	1.72906	0.7237	2.29857	3.02565	1.65768	1.38842	2.3273
Calr3	-1.79291	0.0454415	0.128139	0.217053	0.176215	0.048171	0.0523017	0.061097	0.173802	0.0538566
Map7d1	-0.893976	0.0461447	9.83224	9.54098	19.8971	5.6114	8.28819	7.84947	13.0901	7.24969
Arrdc3	-0.992267	0.0481846	2.21232	2.79432	6.91503	1.69568	1.80107	2.22707	3.97389	1.90794

## Sheet: Microglia
gene	log2FoldChange	padj	microglia_ctrl_1	microglia_ctrl_2	microglia_ctrl_3	microglia_pdibot_1	microglia_pdibot_2	microglia_pdibot_3	ctrl_average	pdibot_average
Hpgd	-0.921168	6.34e-19	11.3242	13.293	10.3428	5.12629	7.36359	5.85443	11.6533	6.11477
Ivns1abp	-0.446195	3.15e-05	86.4618	67.7121	95.6116	66.2196	53.4678	60.3391	83.2618	60.0088
Pld3	0.587722	3.15e-05	6.56469	6.16153	5.66111	8.2957	10.4356	8.64302	6.12911	9.12476
Pcm1	-0.489638	7.66e-05	2.97402	2.37481	3.12798	2.19418	1.74768	2.00932	2.8256	1.98372
Kctd12	-0.45785	0.000479138	84.7006	77.0677	74.7371	66.6263	59.5925	45.7131	78.8351	57.3106
Atrx	-0.399693	0.000479138	4.28901	2.9407	3.95255	3.22457	2.24971	2.88828	3.72742	2.78752
Capza2	-0.398266	0.00256572	12.7942	12.5621	14.3856	9.75734	10.357	9.64595	13.2473	9.92011
Rock1	-0.511301	0.00366965	1.08903	0.849719	0.896813	0.75493	0.589019	0.622404	0.945187	0.655451
Arhgap12	-0.428069	0.00367199	2.38396	2.20739	2.95735	1.81337	1.80992	1.88034	2.51623	1.83454
Nav3	-0.378433	0.00367199	0.682004	0.877319	0.799394	0.522987	0.749463	0.535793	0.786239	0.602747
Eif4a2	-0.541864	0.0038139	20.0507	22.6802	33.1183	13.2998	19.6203	18.0375	25.2831	16.9859
Ccr5	-0.362836	0.00660042	25.3635	29.179	27.4051	19.7149	25.3106	18.4342	27.3159	21.1532
Rock2	-0.377266	0.00660042	7.17859	5.94151	8.32895	6.02337	4.41718	5.8825	7.14968	5.44102
Top2b	-0.459707	0.00660042	3.30588	2.56419	3.73414	2.74127	1.79976	2.38091	3.2014	2.30731
Lgals9	0.378577	0.00914023	10.4773	9.33392	10.0691	14.072	12.2031	12.1674	9.96012	12.8141
Csf1	0.765783	0.00914023	1.0648	0.972064	1.36941	1.44642	1.84795	2.47927	1.13543	1.92455
Pnisr	-0.361318	0.0111482	16.7256	12.5876	16.6568	13.8083	9.98177	11.5837	15.3233	11.7912
Ttc14	-0.503285	0.0111482	7.66326	6.09847	8.38186	5.80913	3.88073	5.87719	7.3812	5.18902
Cd68	0.316516	0.0127102	349.927	430.872	339.61	433.276	533.263	413.365	373.47	459.968
Cfh	-0.328081	0.0156051	6.39015	6.45718	7.14886	5.28408	5.2632	5.17727	6.6654	5.24151
Chordc1	-0.626606	0.0162347	1.68998	2.57868	2.01248	1.18803	1.82577	1.05785	2.09372	1.35722
Stk17b	-0.465533	0.0162461	4.07117	3.95984	5.38266	3.26542	2.95713	3.30437	4.47122	3.17564
Capns1	0.342153	0.0164779	21.6778	22.6279	21.6824	27.3194	29.831	25.664	21.996	27.6048
mt-Nd6	-0.332016	0.0185813	1573.01	731.627	447.6	1155.26	606.696	356.964	917.413	706.306
Srsf1	-0.480968	0.0202613	16.2014	12.4578	12.517	10.8187	9.18834	9.03274	13.7254	9.67994
Tmem104	0.388025	0.0202613	2.84463	2.9181	2.94043	3.62691	3.63705	4.00548	2.90105	3.75648
Clk1	-0.443031	0.020554	18.6018	16.3789	30.1516	11.7436	15.7309	19.0871	21.7108	15.5205
Tpr	-0.328118	0.020554	12.3974	8.10574	9.70486	10.3433	6.30245	7.29363	10.0693	7.97981
Atp13a2	0.384782	0.020554	7.0529	6.64279	9.78617	8.29915	9.7508	12.1446	7.82729	10.0649
Zscan29	-0.515849	0.020554	8.07299	5.99213	7.26927	4.64376	4.96164	5.02488	7.11146	4.87676
Arid4b	-0.482481	0.020554	0.696331	0.529345	0.573636	0.477868	0.395932	0.395562	0.599771	0.423121
C1qc	0.282245	0.0216585	601.856	658.766	544.094	703.554	813.449	654.366	601.572	723.79
Tubb4a	0.659539	0.0259444	2.71089	2.95324	4.07806	3.75094	4.71353	6.94184	3.2474	5.13544
Ddx5	-0.324071	0.0275201	76.7732	60.702	75.552	59.6952	54.888	52.8521	71.0091	55.8118
Asah1	-0.304328	0.0275201	13.8145	14.2802	16.9474	10.8052	11.8486	13.3847	15.014	12.0129
Sec62	-0.466453	0.0293366	5.06572	3.52722	4.49895	3.61831	3.0872	2.62617	4.36396	3.11056
Tubb5	0.41162	0.0313678	86.3509	74.7821	55.541	137.528	88.1476	67.1831	72.2247	97.6194
Srsf6	-0.338931	0.031529	45.0062	39.2852	56.7653	35.479	32.9718	40.9563	47.0189	36.469
Zfp871	-0.321488	0.0327185	16.1759	14.3954	19.7351	13.3588	11.7189	14.5304	16.7688	13.2027
Rab11fip5	0.438281	0.0377602	1.98319	1.48629	1.99641	2.45564	2.10006	2.73621	1.82196	2.43064
Hnrnph1	-0.403325	0.0379576	47.9353	29.358	51.4671	36.6014	27.4982	30.0404	42.9202	31.38
Wsb1	-0.426393	0.0379576	17.572	12.9376	16.9953	10.8437	12.5094	11.3103	15.835	11.5545
Prpf4b	-0.34453	0.0379576	8.29098	6.16398	8.85453	6.34301	5.39843	6.23318	7.76983	5.99154
Clptm1	0.361108	0.0379576	4.05251	5.31369	4.99002	5.44679	6.66261	6.07649	4.78541	6.06196
Arhgap5	-0.349692	0.0379576	4.66806	3.85967	3.77911	3.32554	3.03459	3.14924	4.10228	3.16979
Scoc	-0.462247	0.0379576	2.94317	3.07311	2.42282	2.10503	2.4423	1.56679	2.81304	2.03804
Mtus1	-0.341319	0.0379576	2.10379	1.76158	1.99596	1.50008	1.56054	1.49825	1.95378	1.51962
Smc6	-0.491425	0.0379576	1.61186	1.24981	1.57608	1.28628	0.869477	0.984961	1.47925	1.0469
Dock11	-0.348313	0.0379576	1.16676	0.982582	1.3513	0.933079	0.808646	0.961186	1.16688	0.90097
Esf1	-0.700245	0.0379576	0.73868	0.487362	0.567048	0.479622	0.278196	0.342921	0.597697	0.366913
Creb1	-0.402574	0.0383881	1.82148	1.77889	1.75049	1.38382	1.48068	1.15439	1.78362	1.33963
Lgals3bp	0.325492	0.0398685	28.5637	36.3163	51.8121	38.153	43.172	62.1206	38.8973	47.8152
Washc4	-0.362854	0.0398685	3.87285	3.97046	4.43292	3.19874	3.25628	2.97227	4.09207	3.14243
Usp9x	-0.326525	0.0398685	3.53637	2.9728	4.01519	2.94717	2.4954	2.81096	3.50812	2.75118
Ash1l	-0.304909	0.0398685	3.1292	2.94284	3.87321	2.55128	2.53295	2.82728	3.31508	2.63717
Ucp2	0.298246	0.0408253	72.4337	77.0352	64.557	88.4825	90.9037	80.4343	71.342	86.6069
Macf1	-0.269723	0.0410657	11.4148	9.63166	13.0266	9.11361	8.86492	9.76467	11.3577	9.24773
Tgfbr1	-0.286365	0.0427142	27.3734	24.9661	32.7213	22.5769	22.5766	23.3451	28.3536	22.8329
Rbm39	-0.328212	0.0432077	12.2309	10.3808	14.4686	9.53879	9.4726	9.9175	12.3601	9.64296
Ctsz	0.336367	0.0432235	30.9317	29.8778	35.6483	34.4219	44.9808	41.2667	32.1526	40.2232
Rbm12b1	-0.79967	0.0432235	3.4366	3.75509	3.23876	1.71117	2.6509	1.65945	3.47682	2.00717
Isyna1	0.610361	0.0438682	11.1636	11.7178	14.4943	18.1902	22.5745	15.823	12.4586	18.8625
Pip4k2a	-0.271405	0.0438682	5.7483	5.32163	6.39559	4.6226	4.72573	4.91573	5.82184	4.75469
Ppil4	-0.495255	0.0438682	2.49531	1.63888	2.2451	1.76381	1.2979	1.38166	2.12643	1.48112
Bod1l	-0.301403	0.0446821	7.04165	4.55396	6.39141	5.54065	3.84906	4.95618	5.99567	4.78196
Dock10	-0.266261	0.0471019	4.87247	4.52014	5.55595	4.01175	4.01738	4.21264	4.98285	4.08059
Cfap74	-0.410379	0.0471019	1.9941	2.29006	2.31237	1.30797	1.75834	1.88019	2.19884	1.64883
Commd8	-0.37729	0.0480909	18.2764	15.9327	16.7258	15.5792	12.671	10.8512	16.9783	13.0338
Man2b2	0.34949	0.049046	6.75066	7.54134	6.55151	7.82741	11.0145	7.69543	6.94784	8.84578

## Sheet: Astrocyte
gene	log2FoldChange	padj	Astro_ctrl_1	Astro_ctrl_2	Astro_ctrl_3	Astro_pdibot_1	Astro_pdibot_2	Astro_pdibot_3	ctrl_average	pdibot_average
mt-Nd2	0.619613	0.0135679	131.759	128.972	101.583	172.435	200.526	167.605	120.771	180.189
Gfap	0.413628	0.0412292	60.3865	57.3786	55.967	97.2249	75.8419	57.5423	57.9107	76.8697
Tubb4a	-0.581771	0.002784	39.3185	49.6506	43.3607	24.6569	39.2114	24.1287	44.1099	29.3323
Cnbp	-0.62708	0.000833084	34.9174	39.2584	35.1404	20.8791	29.7207	19.4779	36.4387	23.3592
Serpinf1	0.560162	0.035692	5.10842	4.57027	4.23999	8.88186	6.33796	5.21686	4.63956	6.81223
Vtn	2.09798	9.68e-12	1.18991	2.86089	7.82552	10.1151	12.7366	17.3306	3.95877	13.3941
Mfap3l	0.667926	0.000753453	1.79484	1.8919	2.3687	2.92819	3.42124	2.9787	2.01848	3.10937
Kctd12	1.45549	2.55e-06	1.24857	1.78693	2.126	3.07239	4.64628	6.16224	1.7205	4.62697
Prex2	0.528189	0.0209381	0.887313	0.925473	1.12843	1.21567	1.20286	1.75757	0.980406	1.39203
Zfp267	0.85815	0.0476807	0.775679	0.641345	1.02032	1.22957	1.27847	1.76435	0.812449	1.42413
Arhgap5	0.859677	0.002784	0.854416	0.586213	0.654051	1.22237	1.02218	1.44914	0.698227	1.23123
Ccdc88a	0.82138	4.98e-05	0.712844	0.379681	0.506141	1.11057	0.784187	0.807205	0.532889	0.900654
Pcm1	0.644226	0.0209381	0.527227	0.369602	0.527034	0.881223	0.635312	0.650033	0.474621	0.722189
Cav1	0.859406	0.0309667	0.358864	0.48726	0.479443	0.692691	0.826387	0.808119	0.441855	0.775732
Frzb	1.87632	4.62e-06	0.115336	0.267192	0.924216	1.02788	0.970651	1.48981	0.435581	1.16278
Nrxn1	0.508996	0.00163313	0.364117	0.329744	0.3922	0.551203	0.437902	0.520424	0.362021	0.503177
C1qtnf1	1.51211	0.000753453	0.213369	0.136018	0.496518	0.729218	0.477591	0.936327	0.281969	0.714379
Plppr4	1.08614	0.0209381	0.190701	0.32798	0.258865	0.416853	0.512088	0.669979	0.259182	0.532973
Nkd2	1.2893	0.0254736	0.159567	0.241586	0.278488	0.722507	0.417813	0.500161	0.226547	0.546827
Igf1	2.36126	1.85e-08	0.0218911	0.0363973	0.157722	0.26073	0.197882	0.382674	0.0720035	0.280429
Alox12	3.29753	0.000943472	0	0.0266242	0.187897	0.202875	0.48682	0.538608	0.0715072	0.409434
Fndc1	1.90631	2.02e-05	0.0179399	0.0406524	0.128864	0.136162	0.149162	0.275304	0.0624854	0.186876
Smtnl2	3.08949	0.0264237	0.0117659	0.00410184	0.103815	0.164316	0.226092	0.189011	0.0398941	0.19314
Alx4	3.19873	0.00018631	0.00340534	0.0118717	0.0554703	0.10752	0.158557	0.205474	0.0235825	0.157184
Alx3	4.11006	0.00956954	0	0.00860796	0.0586549	0.172414	0.310228	0.357953	0.022421	0.280198
Crybg1	2.61583	0.00161148	0.00133848	0.00606609	0.0149895	0.0203179	0.0588593	0.0330392	0.00746467	0.0374055
Clca3a1	4.0648	0.0209381	0	0.00295503	0.0172592	0.0797751	0.0720431	0.106276	0.00673806	0.0860315
