# Supplementary material for: Oligodendrocyte-lineage cell exocytosis and L-type prostaglandin D synthase promote oligodendrocyte development and myelination
Source: eLife. 2023 Feb 13;12:e77441. doi: 10.7554/eLife.77441 (PMC9946447; doi:10.7554/eLife.77441)
Supplement: Supplementary file 3. — No gene ontology terms were significantly enriched in genes downregulated in OPCs, astrocytes, or upregulated in microglia in PD:ibot mice. [file elife-77441-supp3.xlsx]

## Sheet: OLG_upregulated
#term ID	term description	observed gene count	background gene count	strength	false discovery rate	-LOG10(fdr)	matching proteins in your network (IDs)	matching proteins in your network (labels)
GO:0007399	nervous system development	99	1888	0.33	1.01e-09	8.99568	10090.ENSMUSP00000000707,10090.ENSMUSP00000001304,10090.ENSMUSP00000001347,10090.ENSMUSP00000001569,10090.ENSMUSP00000001963,10090.ENSMUSP00000002412,10090.ENSMUSP00000002765,10090.ENSMUSP00000004133,10090.ENSMUSP00000004560,10090.ENSMUSP00000004673,10090.ENSMUSP00000006112,10090.ENSMUSP00000007799,10090.ENSMUSP00000014917,10090.ENSMUSP00000020283,10090.ENSMUSP00000021674,10090.ENSMUSP00000021950…	Loxl3,Ckb,Rnd2,Flot1,Ace,Ncan,Prkd1,Brinp2,Bid,Ndrg2,Ephb3,Cav1,Dll1,H2afy2,Fos,Dbn1,Ndufs4,Clu,Nefm,Nptxr,Mapk8ip2,Cpne5,Vim,Mdk,Brinp1,Mycl,Mfsd2a,Gabrb1,Dfna5,Timp4,Cd9,Fgf13,Cox7b,Jhy,Acat1,Dscaml1,Ptchd2,Htr5a,Micall2,Pcdha1,Camsap2,Lppr5,Dagla,Myo16,Tenm2,Ust,D3Bwg0562e,Gli2,Dscam,Sall2,Sall3,Nrep,Flrt2,Pcp4,Ptprs,Kbp,Stx3,Nkx2-2,Dtnbp1,Bmp4,Cpne6,Brinp3,Srrm4,Lppr1,Map2,Dchs1,Stk24,Rac1,Sy…
GO:0045664	regulation of neuron differentiation	43	595	0.47	1.54e-06	5.81248	10090.ENSMUSP00000001347,10090.ENSMUSP00000002765,10090.ENSMUSP00000004133,10090.ENSMUSP00000006112,10090.ENSMUSP00000007799,10090.ENSMUSP00000014917,10090.ENSMUSP00000021950,10090.ENSMUSP00000022638,10090.ENSMUSP00000024805,10090.ENSMUSP00000028062,10090.ENSMUSP00000030036,10090.ENSMUSP00000030407,10090.ENSMUSP00000033473,10090.ENSMUSP00000038490,10090.ENSMUSP00000041920,10090.ENSMUSP00000045121…	Rnd2,Prkd1,Brinp2,Ephb3,Cav1,Dll1,Dbn1,Nefm,Cpne5,Vim,Brinp1,Mycl,Fgf13,Ptchd2,Camsap2,Lppr5,Ust,Gli2,Dscam,Nrep,Pcp4,Ptprs,Nkx2-2,Dtnbp1,Bmp4,Cpne6,Brinp3,Map2,Stk24,Rac1,Syngap1,Fgfr1,Sdk1,Akap5,Cpeb1,Fyn,Vwc2,Neurl1a,Ttc3,Bai3,Nme1,H2-D1,Asap1
GO:0048699	generation of neurons	70	1318	0.34	1.55e-06	5.80967	10090.ENSMUSP00000001347,10090.ENSMUSP00000001569,10090.ENSMUSP00000001963,10090.ENSMUSP00000002765,10090.ENSMUSP00000004133,10090.ENSMUSP00000006112,10090.ENSMUSP00000007799,10090.ENSMUSP00000014917,10090.ENSMUSP00000021950,10090.ENSMUSP00000022616,10090.ENSMUSP00000022638,10090.ENSMUSP00000023057,10090.ENSMUSP00000023291,10090.ENSMUSP00000024805,10090.ENSMUSP00000028062,10090.ENSMUSP00000030036…	Rnd2,Flot1,Ace,Prkd1,Brinp2,Ephb3,Cav1,Dll1,Dbn1,Clu,Nefm,Nptxr,Mapk8ip2,Cpne5,Vim,Brinp1,Mycl,Gabrb1,Dfna5,Fgf13,Dscaml1,Ptchd2,Micall2,Camsap2,Lppr5,Dagla,Myo16,Tenm2,Ust,D3Bwg0562e,Gli2,Dscam,Sall3,Nrep,Flrt2,Pcp4,Ptprs,Stx3,Nkx2-2,Dtnbp1,Bmp4,Cpne6,Brinp3,Map2,Stk24,Rac1,Syngap1,Fgfr1,Sdk1,Fry,Smarca1,Akap5,Cpeb1,Fyn,Stmn3,Vwc2,Neurl1a,Tenm1,Syn1,Hdac6,Ttc3,Lphn3,Bai3,Nme1,Abi1,Camsap3,Matn2,…
GO:0022008	neurogenesis	72	1420	0.32	4.29e-06	5.36754	10090.ENSMUSP00000001347,10090.ENSMUSP00000001569,10090.ENSMUSP00000001963,10090.ENSMUSP00000002765,10090.ENSMUSP00000004133,10090.ENSMUSP00000006112,10090.ENSMUSP00000007799,10090.ENSMUSP00000014917,10090.ENSMUSP00000021950,10090.ENSMUSP00000022616,10090.ENSMUSP00000022638,10090.ENSMUSP00000023057,10090.ENSMUSP00000023291,10090.ENSMUSP00000024805,10090.ENSMUSP00000028062,10090.ENSMUSP00000030036…	Rnd2,Flot1,Ace,Prkd1,Brinp2,Ephb3,Cav1,Dll1,Dbn1,Clu,Nefm,Nptxr,Mapk8ip2,Cpne5,Vim,Brinp1,Mycl,Gabrb1,Dfna5,Cd9,Fgf13,Dscaml1,Ptchd2,Micall2,Camsap2,Lppr5,Dagla,Myo16,Tenm2,Ust,D3Bwg0562e,Gli2,Dscam,Sall3,Nrep,Flrt2,Pcp4,Ptprs,Stx3,Nkx2-2,Dtnbp1,Bmp4,Cpne6,Brinp3,Map2,Dchs1,Stk24,Rac1,Syngap1,Fgfr1,Sdk1,Fry,Smarca1,Akap5,Cpeb1,Fyn,Stmn3,Vwc2,Neurl1a,Tenm1,Syn1,Hdac6,Ttc3,Lphn3,Bai3,Nme1,Abi1,Cams…
GO:0050767	regulation of neurogenesis	45	727	0.41	2.15e-05	4.66756	10090.ENSMUSP00000001347,10090.ENSMUSP00000001963,10090.ENSMUSP00000002765,10090.ENSMUSP00000004133,10090.ENSMUSP00000006112,10090.ENSMUSP00000007799,10090.ENSMUSP00000014917,10090.ENSMUSP00000021950,10090.ENSMUSP00000022638,10090.ENSMUSP00000024805,10090.ENSMUSP00000028062,10090.ENSMUSP00000030036,10090.ENSMUSP00000030407,10090.ENSMUSP00000033473,10090.ENSMUSP00000038490,10090.ENSMUSP00000041920…	Rnd2,Ace,Prkd1,Brinp2,Ephb3,Cav1,Dll1,Dbn1,Nefm,Cpne5,Vim,Brinp1,Mycl,Fgf13,Ptchd2,Camsap2,Lppr5,Ust,Gli2,Dscam,Nrep,Flrt2,Pcp4,Ptprs,Nkx2-2,Dtnbp1,Bmp4,Cpne6,Brinp3,Map2,Stk24,Rac1,Syngap1,Fgfr1,Sdk1,Akap5,Cpeb1,Fyn,Vwc2,Neurl1a,Ttc3,Bai3,Nme1,H2-D1,Asap1
GO:0051960	regulation of nervous system development	48	806	0.39	2.15e-05	4.66756	10090.ENSMUSP00000001347,10090.ENSMUSP00000001963,10090.ENSMUSP00000002765,10090.ENSMUSP00000004133,10090.ENSMUSP00000006112,10090.ENSMUSP00000007799,10090.ENSMUSP00000014917,10090.ENSMUSP00000021045,10090.ENSMUSP00000021950,10090.ENSMUSP00000022638,10090.ENSMUSP00000024805,10090.ENSMUSP00000028062,10090.ENSMUSP00000030036,10090.ENSMUSP00000030407,10090.ENSMUSP00000033473,10090.ENSMUSP00000038490…	Rnd2,Ace,Prkd1,Brinp2,Ephb3,Cav1,Dll1,Asic2,Dbn1,Nefm,Cpne5,Vim,Brinp1,Mycl,Fgf13,Ptchd2,Camsap2,Lppr5,Ust,Gli2,Dscam,Nrep,Flrt2,Pcp4,Ptprs,Nkx2-2,Dtnbp1,Bmp4,Cpne6,Brinp3,Map2,Stk24,Rac1,Syngap1,Fgfr1,Sdk1,Akap5,Cpeb1,Fyn,Vwc2,Neurl1a,Lrtm2,Ttc3,Lphn3,Bai3,Nme1,H2-D1,Asap1
GO:0060284	regulation of cell development	48	841	0.37	5.37e-05	4.27003	10090.ENSMUSP00000001347,10090.ENSMUSP00000001963,10090.ENSMUSP00000002765,10090.ENSMUSP00000004133,10090.ENSMUSP00000006112,10090.ENSMUSP00000007799,10090.ENSMUSP00000014917,10090.ENSMUSP00000021950,10090.ENSMUSP00000022638,10090.ENSMUSP00000024805,10090.ENSMUSP00000028062,10090.ENSMUSP00000030036,10090.ENSMUSP00000030407,10090.ENSMUSP00000033473,10090.ENSMUSP00000034049,10090.ENSMUSP00000038490…	Rnd2,Ace,Prkd1,Brinp2,Ephb3,Cav1,Dll1,Dbn1,Nefm,Cpne5,Vim,Brinp1,Mycl,Fgf13,Slc25a4,Ptchd2,Camsap2,Lppr5,Ust,S1pr2,Gli2,Dscam,Nrep,Flrt2,Pcp4,Ptprs,Nkx2-2,Dtnbp1,Bmp4,Cpne6,Brinp3,Map2,Stk24,Rac1,Syngap1,Fgfr1,Sdk1,Akap5,Cpeb1,Fyn,Vwc2,Dmtn,Neurl1a,Ttc3,Bai3,Nme1,H2-D1,Asap1
GO:0007275	multicellular organism development	142	3901	0.18	5.37e-05	4.27003	10090.ENSMUSP00000000707,10090.ENSMUSP00000001304,10090.ENSMUSP00000001347,10090.ENSMUSP00000001569,10090.ENSMUSP00000001963,10090.ENSMUSP00000002412,10090.ENSMUSP00000002765,10090.ENSMUSP00000004051,10090.ENSMUSP00000004133,10090.ENSMUSP00000004560,10090.ENSMUSP00000004673,10090.ENSMUSP00000006112,10090.ENSMUSP00000007799,10090.ENSMUSP00000014917,10090.ENSMUSP00000020158,10090.ENSMUSP00000020283…	Loxl3,Ckb,Rnd2,Flot1,Ace,Ncan,Prkd1,Hlf,Brinp2,Bid,Ndrg2,Ephb3,Cav1,Dll1,Myb,H2afy2,Gnb2l1,Nxn,Fos,Gpld1,Dbn1,Cxcl14,Ndufs4,Rnaseh2b,Clu,Nefm,Nptxr,Mapk8ip2,Cpne5,Prkar1b,Smyd2,Vim,Mdk,Brinp1,Fmn2,Mycl,Mfsd2a,Ptpru,Fosl2,Ugdh,Gabrb1,Prkab1,Asns,Dfna5,Timp4,Cd9,Mfge8,Fgf13,Cox7b,Jhy,Acat1,Dscaml1,Ptchd2,Htr5a,Micall2,Pcdha1,Sobp,Camsap2,Lppr5,Dagla,Myo16,Tenm2,Ust,D3Bwg0562e,Gli2,Dscam,Pnlip,Sall2…
GO:0048731	system development	129	3446	0.19	5.55e-05	4.25571	10090.ENSMUSP00000000707,10090.ENSMUSP00000001304,10090.ENSMUSP00000001347,10090.ENSMUSP00000001569,10090.ENSMUSP00000001963,10090.ENSMUSP00000002412,10090.ENSMUSP00000002765,10090.ENSMUSP00000004051,10090.ENSMUSP00000004133,10090.ENSMUSP00000004560,10090.ENSMUSP00000004673,10090.ENSMUSP00000006112,10090.ENSMUSP00000007799,10090.ENSMUSP00000014917,10090.ENSMUSP00000020158,10090.ENSMUSP00000020283…	Loxl3,Ckb,Rnd2,Flot1,Ace,Ncan,Prkd1,Hlf,Brinp2,Bid,Ndrg2,Ephb3,Cav1,Dll1,Myb,H2afy2,Nxn,Fos,Gpld1,Dbn1,Cxcl14,Ndufs4,Clu,Nefm,Nptxr,Mapk8ip2,Cpne5,Prkar1b,Smyd2,Vim,Mdk,Brinp1,Mycl,Mfsd2a,Ptpru,Fosl2,Gabrb1,Asns,Dfna5,Timp4,Cd9,Mfge8,Fgf13,Cox7b,Jhy,Acat1,Dscaml1,Ptchd2,Htr5a,Micall2,Pcdha1,Sobp,Camsap2,Lppr5,Dagla,Myo16,Tenm2,Ust,D3Bwg0562e,Gli2,Dscam,Sall2,Sall3,Nrep,Mettl21c,Epcam,Flrt2,Pcp4,V…
GO:0023052	signaling	121	3187	0.19	7.36e-05	4.13312	10090.ENSMUSP00000001347,10090.ENSMUSP00000001569,10090.ENSMUSP00000002087,10090.ENSMUSP00000002765,10090.ENSMUSP00000002848,10090.ENSMUSP00000004560,10090.ENSMUSP00000004673,10090.ENSMUSP00000006112,10090.ENSMUSP00000007799,10090.ENSMUSP00000014917,10090.ENSMUSP00000017288,10090.ENSMUSP00000020165,10090.ENSMUSP00000020301,10090.ENSMUSP00000020640,10090.ENSMUSP00000021045,10090.ENSMUSP00000021204…	Rnd2,Flot1,Pnck,Prkd1,Grin2d,Bid,Ndrg2,Ephb3,Cav1,Dll1,Rnd3,Pde7b,Vsir,Gnb2l1,Asic2,Nxn,Fos,Gpld1,Cxcl14,Adcy2,Ndufs4,Clu,Nptxr,Mapk8ip2,Gpr123,Vim,Prkcq,Ptpru,Mad2l2,Nsg1,Gabrb1,Sparcl1,Timp4,Cd9,Fgf13,Gabrq,Bgn,Mt2,Pik3r2,Chn2,Abhd2,Htr5a,Pcdha1,Fam65a,Gpr26,Ddx58,Lppr5,Dagla,Kcnh5,Kcnh2,Kcnh8,Myo16,Kiaa0922,Tenm2,D3Bwg0562e,S1pr2,Gli2,Sall2,Lcp2,Mettl21c,Epcam,Flrt2,Pcp4,Gabra3,Vav2,Ngfrap1,Ad…
GO:0048856	anatomical structure development	147	4157	0.16	0.00012	3.92082	10090.ENSMUSP00000000707,10090.ENSMUSP00000001304,10090.ENSMUSP00000001347,10090.ENSMUSP00000001569,10090.ENSMUSP00000001963,10090.ENSMUSP00000002412,10090.ENSMUSP00000002765,10090.ENSMUSP00000004051,10090.ENSMUSP00000004133,10090.ENSMUSP00000004560,10090.ENSMUSP00000004673,10090.ENSMUSP00000006112,10090.ENSMUSP00000007799,10090.ENSMUSP00000014917,10090.ENSMUSP00000020158,10090.ENSMUSP00000020283…	Loxl3,Ckb,Rnd2,Flot1,Ace,Ncan,Prkd1,Hlf,Brinp2,Bid,Ndrg2,Ephb3,Cav1,Dll1,Myb,H2afy2,Ccng1,Gnb2l1,Nxn,Fos,Gpld1,Dbn1,Cxcl14,Ndufs4,Rnaseh2b,Clu,Nefm,Nptxr,Mapk8ip2,Cpne5,Prkar1b,Smyd2,Vim,Mdk,Brinp1,Fmn2,Mycl,Mfsd2a,Ptpru,Fosl2,Ugdh,Gabrb1,Sparcl1,Prkab1,Asns,Dfna5,Timp4,Cd9,Mfge8,Fgf13,Cox7b,Jhy,Acat1,Dscaml1,Abhd2,Ptchd2,Htr5a,Micall2,Pcdha1,Sobp,Camsap2,Lppr5,Dagla,Myo16,Tenm2,Ust,D3Bwg0562e,Gl…
GO:0007154	cell communication	123	3301	0.19	0.00013	3.88606	10090.ENSMUSP00000001347,10090.ENSMUSP00000001569,10090.ENSMUSP00000002087,10090.ENSMUSP00000002765,10090.ENSMUSP00000002848,10090.ENSMUSP00000004560,10090.ENSMUSP00000004673,10090.ENSMUSP00000006112,10090.ENSMUSP00000007799,10090.ENSMUSP00000014917,10090.ENSMUSP00000017288,10090.ENSMUSP00000020165,10090.ENSMUSP00000020301,10090.ENSMUSP00000020640,10090.ENSMUSP00000021045,10090.ENSMUSP00000021204…	Rnd2,Flot1,Pnck,Prkd1,Grin2d,Bid,Ndrg2,Ephb3,Cav1,Dll1,Rnd3,Pde7b,Vsir,Gnb2l1,Asic2,Nxn,Fos,Gpld1,Dbn1,Cxcl14,Adcy2,Ndufs4,Clu,Nptxr,Mapk8ip2,Gpr123,Vim,Prkcq,Ptpru,Mad2l2,Nsg1,Gabrb1,Sparcl1,Asns,Timp4,Cd9,Fgf13,Gabrq,Bgn,Mt2,Pik3r2,Chn2,Abhd2,Htr5a,Pcdha1,Fam65a,Gpr26,Ddx58,Lppr5,Dagla,Kcnh5,Kcnh2,Kcnh8,Myo16,Kiaa0922,Tenm2,D3Bwg0562e,S1pr2,Gli2,Sall2,Lcp2,Mettl21c,Epcam,Flrt2,Pcp4,Gabra3,Vav2,…
GO:0050794	regulation of cellular process	237	7704	0.1	0.00013	3.88606	10090.ENSMUSP00000000707,10090.ENSMUSP00000001347,10090.ENSMUSP00000001569,10090.ENSMUSP00000001963,10090.ENSMUSP00000002087,10090.ENSMUSP00000002412,10090.ENSMUSP00000002765,10090.ENSMUSP00000002848,10090.ENSMUSP00000004051,10090.ENSMUSP00000004133,10090.ENSMUSP00000004560,10090.ENSMUSP00000004673,10090.ENSMUSP00000006112,10090.ENSMUSP00000007799,10090.ENSMUSP00000014917,10090.ENSMUSP00000015234…	Loxl3,Rnd2,Flot1,Ace,Pnck,Ncan,Prkd1,Grin2d,Hlf,Brinp2,Bid,Ndrg2,Ephb3,Cav1,Dll1,Ptgds,Capza2,Lcorl,Rnd3,Arfgef3,Myb,Pde7b,H2afy2,Vsir,Ccng1,Gnb2l1,Rnf144a,Asic2,Nxn,Nova1,Fos,Gpld1,Nqo2,Dbn1,Cxcl14,Adcy2,Ndufs4,Rnaseh2b,Rgcc,Clu,Nefm,Nptxr,Grina,Mapk8ip2,Pros1,Asic1,Leprel2,Cpne5,Ehd3,Lims2,Pycr1,Rps26,Shmt2,Gpr123,Prkar1b,Smyd2,Vim,Prkcq,Mdk,Mrgbp,Nmd3,Brinp1,Fmn2,Cyp2j6,Mycl,Ptpru,Mad2l2,Nsg1,…
GO:0120035	regulation of plasma membrane bounded cell projection organization	37	604	0.4	0.00019	3.72125	10090.ENSMUSP00000001347,10090.ENSMUSP00000002765,10090.ENSMUSP00000006112,10090.ENSMUSP00000007799,10090.ENSMUSP00000021950,10090.ENSMUSP00000022638,10090.ENSMUSP00000024805,10090.ENSMUSP00000028062,10090.ENSMUSP00000028118,10090.ENSMUSP00000033473,10090.ENSMUSP00000041920,10090.ENSMUSP00000045121,10090.ENSMUSP00000052014,10090.ENSMUSP00000052017,10090.ENSMUSP00000056040,10090.ENSMUSP00000062539…	Rnd2,Prkd1,Ephb3,Cav1,Dbn1,Nefm,Cpne5,Vim,Prkcq,Fgf13,Camsap2,Lppr5,Tenm2,Ust,Dscam,Pcp4,Ptprs,Dtnbp1,Bmp4,Cpne6,Map2,Stk24,Rac1,Syngap1,Fgfr1,Sdk1,Akap5,Cpeb1,Fyn,Myo10,Dmtn,Neurl1a,Tenm1,Bai3,Nme1,H2-D1,Asap1
GO:0010975	regulation of neuron projection development	31	461	0.44	0.00023	3.63827	10090.ENSMUSP00000001347,10090.ENSMUSP00000002765,10090.ENSMUSP00000006112,10090.ENSMUSP00000021950,10090.ENSMUSP00000022638,10090.ENSMUSP00000024805,10090.ENSMUSP00000028062,10090.ENSMUSP00000033473,10090.ENSMUSP00000041920,10090.ENSMUSP00000045121,10090.ENSMUSP00000052017,10090.ENSMUSP00000056040,10090.ENSMUSP00000062539,10090.ENSMUSP00000064048,10090.ENSMUSP00000072170,10090.ENSMUSP00000073720…	Rnd2,Prkd1,Ephb3,Dbn1,Nefm,Cpne5,Vim,Fgf13,Camsap2,Lppr5,Ust,Dscam,Pcp4,Ptprs,Dtnbp1,Bmp4,Cpne6,Map2,Stk24,Rac1,Syngap1,Fgfr1,Sdk1,Akap5,Cpeb1,Fyn,Neurl1a,Bai3,Nme1,H2-D1,Asap1
GO:0032501	multicellular organismal process	164	4861	0.14	0.00023	3.63827	10090.ENSMUSP00000000707,10090.ENSMUSP00000001304,10090.ENSMUSP00000001347,10090.ENSMUSP00000001569,10090.ENSMUSP00000001963,10090.ENSMUSP00000002412,10090.ENSMUSP00000002765,10090.ENSMUSP00000002848,10090.ENSMUSP00000004051,10090.ENSMUSP00000004133,10090.ENSMUSP00000004560,10090.ENSMUSP00000004673,10090.ENSMUSP00000006112,10090.ENSMUSP00000007799,10090.ENSMUSP00000014917,10090.ENSMUSP00000020158…	Loxl3,Ckb,Rnd2,Flot1,Ace,Ncan,Prkd1,Grin2d,Hlf,Brinp2,Bid,Ndrg2,Ephb3,Cav1,Dll1,Myb,H2afy2,Gnb2l1,Asic2,Nxn,Fos,Gpld1,Nqo2,Dbn1,Cxcl14,Ndufs4,Rnaseh2b,Rgcc,Clu,Nefm,Nptxr,Mapk8ip2,Pros1,Asic1,Cpne5,Prkar1b,Smyd2,Vim,Mdk,Brinp1,Fmn2,Cyp2j6,Mycl,Mfsd2a,Ptpru,Fosl2,Ugdh,Gabrb1,Prkab1,Asns,Dfna5,Timp4,Cd9,Mfge8,Fgf13,Cox7b,Bgn,Jhy,Acat1,Dscaml1,Abhd2,Ptchd2,Htr5a,Micall2,Pcdha1,Sobp,Camsap2,Lppr5,Asi…
GO:0007165	signal transduction	111	2971	0.19	0.00038	3.42022	10090.ENSMUSP00000001347,10090.ENSMUSP00000001569,10090.ENSMUSP00000002087,10090.ENSMUSP00000002765,10090.ENSMUSP00000002848,10090.ENSMUSP00000004560,10090.ENSMUSP00000004673,10090.ENSMUSP00000006112,10090.ENSMUSP00000007799,10090.ENSMUSP00000014917,10090.ENSMUSP00000017288,10090.ENSMUSP00000020165,10090.ENSMUSP00000020301,10090.ENSMUSP00000020640,10090.ENSMUSP00000021045,10090.ENSMUSP00000021204…	Rnd2,Flot1,Pnck,Prkd1,Grin2d,Bid,Ndrg2,Ephb3,Cav1,Dll1,Rnd3,Pde7b,Vsir,Gnb2l1,Asic2,Nxn,Fos,Gpld1,Adcy2,Ndufs4,Clu,Nptxr,Mapk8ip2,Gpr123,Vim,Prkcq,Ptpru,Mad2l2,Nsg1,Gabrb1,Sparcl1,Timp4,Cd9,Fgf13,Gabrq,Bgn,Mt2,Pik3r2,Chn2,Abhd2,Htr5a,Fam65a,Gpr26,Ddx58,Lppr5,Dagla,Kcnh5,Kcnh2,Kcnh8,Myo16,Kiaa0922,Tenm2,D3Bwg0562e,S1pr2,Gli2,Sall2,Lcp2,Mettl21c,Epcam,Flrt2,Pcp4,Gabra3,Vav2,Ngfrap1,Adcyap1r1,Eya2,I…
GO:0032502	developmental process	150	4414	0.15	0.00054	3.26761	10090.ENSMUSP00000000707,10090.ENSMUSP00000001304,10090.ENSMUSP00000001347,10090.ENSMUSP00000001569,10090.ENSMUSP00000001963,10090.ENSMUSP00000002412,10090.ENSMUSP00000002765,10090.ENSMUSP00000004051,10090.ENSMUSP00000004133,10090.ENSMUSP00000004560,10090.ENSMUSP00000004673,10090.ENSMUSP00000006112,10090.ENSMUSP00000007799,10090.ENSMUSP00000014917,10090.ENSMUSP00000020158,10090.ENSMUSP00000020283…	Loxl3,Ckb,Rnd2,Flot1,Ace,Ncan,Prkd1,Hlf,Brinp2,Bid,Ndrg2,Ephb3,Cav1,Dll1,Myb,H2afy2,Vsir,Ccng1,Gnb2l1,Nxn,Fos,Gpld1,Dbn1,Cxcl14,Ndufs4,Rnaseh2b,Clu,Nefm,Nptxr,Mapk8ip2,Cpne5,Prkar1b,Smyd2,Vim,Mdk,Brinp1,Fmn2,Mycl,Mfsd2a,Ptpru,Fosl2,Ugdh,Gabrb1,Sparcl1,Prkab1,Asns,Dfna5,Timp4,Cd9,Mfge8,Fgf13,Cox7b,Jhy,Acat1,Dscaml1,Abhd2,Ptchd2,Htr5a,Micall2,Pcdha1,Sobp,Camsap2,Lppr5,Dagla,Myo16,Arxes2,Tenm2,Ust,D…
GO:0051239	regulation of multicellular organismal process	94	2415	0.2	0.00057	3.24413	10090.ENSMUSP00000000707,10090.ENSMUSP00000001347,10090.ENSMUSP00000001569,10090.ENSMUSP00000001963,10090.ENSMUSP00000002765,10090.ENSMUSP00000002848,10090.ENSMUSP00000004133,10090.ENSMUSP00000004673,10090.ENSMUSP00000006112,10090.ENSMUSP00000007799,10090.ENSMUSP00000014917,10090.ENSMUSP00000015234,10090.ENSMUSP00000020158,10090.ENSMUSP00000020283,10090.ENSMUSP00000020301,10090.ENSMUSP00000020640…	Loxl3,Rnd2,Flot1,Ace,Prkd1,Grin2d,Brinp2,Ndrg2,Ephb3,Cav1,Dll1,Ptgds,Myb,H2afy2,Vsir,Gnb2l1,Asic2,Fos,Gpld1,Dbn1,Rgcc,Clu,Nefm,Pros1,Cpne5,Ehd3,Lims2,Vim,Prkcq,Brinp1,Cyp2j6,Mycl,Mad2l2,Cd9,Fgf13,Slc25a4,Pik3r2,Ptchd2,Camsap2,Ddx58,Lppr5,Kcnh2,Kiaa0922,Ust,S1pr2,Gli2,Dscam,Nrep,S100a1,Flrt2,Pcp4,Ptprs,Zfp580,Nkx2-2,Rai1,Dtnbp1,Bmp4,Cpne6,Brinp3,Map2,Kcnk2,Stk24,Rac1,Syngap1,Fgfr1,Sdk1,Atp1a2,Pxn,…
GO:0051962	positive regulation of nervous system development	31	503	0.4	0.00096	3.01773	10090.ENSMUSP00000001347,10090.ENSMUSP00000001963,10090.ENSMUSP00000002765,10090.ENSMUSP00000004133,10090.ENSMUSP00000006112,10090.ENSMUSP00000021045,10090.ENSMUSP00000021950,10090.ENSMUSP00000024805,10090.ENSMUSP00000028062,10090.ENSMUSP00000030036,10090.ENSMUSP00000045121,10090.ENSMUSP00000054837,10090.ENSMUSP00000056040,10090.ENSMUSP00000062171,10090.ENSMUSP00000062539,10090.ENSMUSP00000069666…	Rnd2,Ace,Prkd1,Brinp2,Ephb3,Asic2,Dbn1,Cpne5,Vim,Brinp1,Lppr5,Gli2,Dscam,Flrt2,Pcp4,Nkx2-2,Bmp4,Cpne6,Brinp3,Stk24,Rac1,Fgfr1,Akap5,Cpeb1,Fyn,Vwc2,Neurl1a,Lrtm2,Lphn3,Bai3,Nme1
GO:0050789	regulation of biological process	242	8160	0.09	0.0013	2.88606	10090.ENSMUSP00000000707,10090.ENSMUSP00000001347,10090.ENSMUSP00000001569,10090.ENSMUSP00000001963,10090.ENSMUSP00000002087,10090.ENSMUSP00000002412,10090.ENSMUSP00000002765,10090.ENSMUSP00000002848,10090.ENSMUSP00000004051,10090.ENSMUSP00000004133,10090.ENSMUSP00000004560,10090.ENSMUSP00000004673,10090.ENSMUSP00000006112,10090.ENSMUSP00000007236,10090.ENSMUSP00000007799,10090.ENSMUSP00000014917…	Loxl3,Rnd2,Flot1,Ace,Pnck,Ncan,Prkd1,Grin2d,Hlf,Brinp2,Bid,Ndrg2,Ephb3,Syngr3,Cav1,Dll1,Ptgds,Capza2,Lcorl,Rnd3,Arfgef3,Myb,Pde7b,H2afy2,Vsir,Ccng1,Gnb2l1,Rnf144a,Asic2,Nxn,Nova1,Fos,Gpld1,Nqo2,Dbn1,Cxcl14,Adcy2,Ndufs4,Rnaseh2b,Rgcc,Clu,Nefm,Nptxr,Grina,Mapk8ip2,Pros1,Asic1,Leprel2,Cpne5,Ehd3,Lims2,Pycr1,Rps26,Shmt2,Gpr123,Prkar1b,Smyd2,Vim,Prkcq,Mdk,Mrgbp,Nmd3,Brinp1,Fmn2,Cyp2j6,Mycl,Ptpru,Mad2l…
GO:2000026	regulation of multicellular organismal development	69	1644	0.24	0.0014	2.85387	10090.ENSMUSP00000000707,10090.ENSMUSP00000001347,10090.ENSMUSP00000001569,10090.ENSMUSP00000001963,10090.ENSMUSP00000002765,10090.ENSMUSP00000004133,10090.ENSMUSP00000006112,10090.ENSMUSP00000007799,10090.ENSMUSP00000014917,10090.ENSMUSP00000020158,10090.ENSMUSP00000020283,10090.ENSMUSP00000020640,10090.ENSMUSP00000021045,10090.ENSMUSP00000021674,10090.ENSMUSP00000021950,10090.ENSMUSP00000022595…	Loxl3,Rnd2,Flot1,Ace,Prkd1,Brinp2,Ephb3,Cav1,Dll1,Myb,H2afy2,Gnb2l1,Asic2,Fos,Dbn1,Rgcc,Nefm,Cpne5,Lims2,Vim,Brinp1,Mycl,Mad2l2,Fgf13,Slc25a4,Pik3r2,Ptchd2,Camsap2,Lppr5,Kiaa0922,Ust,S1pr2,Gli2,Dscam,Nrep,S100a1,Flrt2,Pcp4,Ptprs,Nkx2-2,Dtnbp1,Bmp4,Cpne6,Brinp3,Map2,Kcnk2,Stk24,Rac1,Syngap1,Fgfr1,Sdk1,Pxn,Ccnd1,Akap5,Cpeb1,Fyn,Sapcd2,Sulf2,Vwc2,Akt3,Neurl1a,Lrtm2,Col4a3,Ttc3,Lphn3,Bai3,Nme1,H2-D1,…
GO:0051716	cellular response to stimulus	145	4344	0.14	0.002	2.69897	10090.ENSMUSP00000001347,10090.ENSMUSP00000001569,10090.ENSMUSP00000002087,10090.ENSMUSP00000002765,10090.ENSMUSP00000002848,10090.ENSMUSP00000004133,10090.ENSMUSP00000004560,10090.ENSMUSP00000004673,10090.ENSMUSP00000006112,10090.ENSMUSP00000007799,10090.ENSMUSP00000014917,10090.ENSMUSP00000017288,10090.ENSMUSP00000020158,10090.ENSMUSP00000020165,10090.ENSMUSP00000020301,10090.ENSMUSP00000020576…	Rnd2,Flot1,Pnck,Prkd1,Grin2d,Brinp2,Bid,Ndrg2,Ephb3,Cav1,Dll1,Rnd3,Myb,Pde7b,Vsir,Ccng1,Gnb2l1,Asic2,Nxn,Fos,Gpld1,Dbn1,Cxcl14,Adcy2,Ndufs4,Rgcc,Clu,Nptxr,Mapk8ip2,Asic1,Pycr1,Gpr123,Vim,Prkcq,Brinp1,Fmn2,Ptpru,Mad2l2,Nsg1,Gabrb1,Sparcl1,Asns,Dfna5,Timp4,Cd9,Fgf13,Gabrq,Bgn,Mt2,Pik3r2,Chn2,Abhd2,Htr5a,Fam65a,Gpr26,Ddx58,Lppr5,Dagla,Kcnh5,Kcnh2,Kcnh8,Myo16,Kiaa0922,Tenm2,D3Bwg0562e,S1pr2,Gli2,Sall…
GO:0050793	regulation of developmental process	82	2106	0.2	0.0024	2.61979	10090.ENSMUSP00000000707,10090.ENSMUSP00000001347,10090.ENSMUSP00000001569,10090.ENSMUSP00000001963,10090.ENSMUSP00000002765,10090.ENSMUSP00000004133,10090.ENSMUSP00000006112,10090.ENSMUSP00000007799,10090.ENSMUSP00000014917,10090.ENSMUSP00000020158,10090.ENSMUSP00000020283,10090.ENSMUSP00000020301,10090.ENSMUSP00000020640,10090.ENSMUSP00000021045,10090.ENSMUSP00000021674,10090.ENSMUSP00000021950…	Loxl3,Rnd2,Flot1,Ace,Prkd1,Brinp2,Ephb3,Cav1,Dll1,Myb,H2afy2,Vsir,Gnb2l1,Asic2,Fos,Dbn1,Cxcl14,Rgcc,Clu,Nefm,Cpne5,Lims2,Vim,Brinp1,Mycl,Mad2l2,Fgf13,Slc25a4,Pik3r2,Ptchd2,Camsap2,Lppr5,Fmnl1,S100a13,Kiaa0922,Ust,S1pr2,Gli2,Epb4.1l2,Dscam,Nrep,S100a1,Flrt2,Pcp4,Ptprs,Nkx2-2,Rai1,Dtnbp1,Bmp4,Cpne6,Brinp3,Map2,Kcnk2,Stk24,Rac1,Syngap1,Fgfr1,Sdk1,Pxn,Ccnd1,Akap5,Cpeb1,Fyn,Sapcd2,Fndc5,Epb4.1,Sulf2,V…
GO:0051489	regulation of filopodium assembly	8	41	0.9	0.0029	2.5376	10090.ENSMUSP00000021950,10090.ENSMUSP00000028118,10090.ENSMUSP00000045121,10090.ENSMUSP00000052014,10090.ENSMUSP00000106087,10090.ENSMUSP00000106612,10090.ENSMUSP00000107439,10090.ENSMUSP00000110711	Dbn1,Prkcq,Lppr5,Tenm2,Myo10,Dmtn,Neurl1a,Tenm1
GO:0048666	neuron development	36	677	0.34	0.0029	2.5376	10090.ENSMUSP00000001569,10090.ENSMUSP00000006112,10090.ENSMUSP00000022616,10090.ENSMUSP00000022638,10090.ENSMUSP00000023057,10090.ENSMUSP00000023291,10090.ENSMUSP00000031122,10090.ENSMUSP00000034592,10090.ENSMUSP00000039707,10090.ENSMUSP00000041920,10090.ENSMUSP00000049345,10090.ENSMUSP00000052014,10090.ENSMUSP00000052306,10090.ENSMUSP00000054837,10090.ENSMUSP00000056040,10090.ENSMUSP00000056967…	Flot1,Ephb3,Clu,Nefm,Nptxr,Mapk8ip2,Gabrb1,Dscaml1,Micall2,Camsap2,Myo16,Tenm2,D3Bwg0562e,Gli2,Dscam,Sall3,Nrep,Flrt2,Stx3,Dtnbp1,Map2,Stk24,Rac1,Syngap1,Fgfr1,Fry,Fyn,Stmn3,Tenm1,Syn1,Hdac6,Bai3,Abi1,Camsap3,Matn2,Tmem108
GO:0050896	response to stimulus	175	5532	0.11	0.0029	2.5376	10090.ENSMUSP00000000707,10090.ENSMUSP00000001347,10090.ENSMUSP00000001569,10090.ENSMUSP00000001963,10090.ENSMUSP00000002087,10090.ENSMUSP00000002765,10090.ENSMUSP00000002848,10090.ENSMUSP00000004133,10090.ENSMUSP00000004560,10090.ENSMUSP00000004673,10090.ENSMUSP00000006112,10090.ENSMUSP00000007799,10090.ENSMUSP00000014917,10090.ENSMUSP00000015234,10090.ENSMUSP00000017288,10090.ENSMUSP00000020158…	Loxl3,Rnd2,Flot1,Ace,Pnck,Prkd1,Grin2d,Brinp2,Bid,Ndrg2,Ephb3,Cav1,Dll1,Ptgds,Rnd3,Myb,Pde7b,Vsir,Ccng1,Gnb2l1,Asic2,Nxn,Abcc3,Fos,Gpld1,Dbn1,Cxcl14,Adcy2,Ndufs4,Rgcc,Clu,Nptxr,Mapk8ip2,Pros1,Asic1,Pycr1,Shmt2,Gpr123,Vim,Prkcq,Mdk,Brinp1,Fmn2,Cyp2j6,Ptpru,Mad2l2,Nsg1,Fosl2,Gabrb1,Sparcl1,Asns,Dfna5,Timp4,Cd9,Fgf13,Gabrq,Bgn,Slc25a4,Mt2,Pik3r2,Acat1,Chn2,Hnrnpul1,Abhd2,Htr5a,Fam65a,Gpr26,Ddx58,Lpp…
GO:0007417	central nervous system development	39	768	0.32	0.0031	2.50864	10090.ENSMUSP00000000707,10090.ENSMUSP00000001304,10090.ENSMUSP00000002412,10090.ENSMUSP00000004560,10090.ENSMUSP00000004673,10090.ENSMUSP00000006112,10090.ENSMUSP00000014917,10090.ENSMUSP00000020283,10090.ENSMUSP00000022286,10090.ENSMUSP00000022616,10090.ENSMUSP00000028062,10090.ENSMUSP00000028672,10090.ENSMUSP00000030408,10090.ENSMUSP00000031122,10090.ENSMUSP00000032462,10090.ENSMUSP00000032492…	Loxl3,Ckb,Ncan,Bid,Ndrg2,Ephb3,Dll1,H2afy2,Ndufs4,Clu,Vim,Mdk,Mfsd2a,Gabrb1,Timp4,Cd9,Fgf13,Cox7b,Jhy,Acat1,Dscaml1,Htr5a,Myo16,Gli2,Sall3,Ptprs,Nkx2-2,Bmp4,Map2,Rac1,Fgfr1,Smarca1,Fyn,Macrod2,Akt3,Neurl1a,Nme1,Kcnc1,Tmem108
GO:0065007	biological regulation	251	8648	0.08	0.0031	2.50864	10090.ENSMUSP00000000707,10090.ENSMUSP00000001304,10090.ENSMUSP00000001347,10090.ENSMUSP00000001569,10090.ENSMUSP00000001963,10090.ENSMUSP00000002087,10090.ENSMUSP00000002412,10090.ENSMUSP00000002765,10090.ENSMUSP00000002848,10090.ENSMUSP00000004051,10090.ENSMUSP00000004133,10090.ENSMUSP00000004554,10090.ENSMUSP00000004560,10090.ENSMUSP00000004673,10090.ENSMUSP00000006112,10090.ENSMUSP00000007236…	Loxl3,Ckb,Rnd2,Flot1,Ace,Pnck,Ncan,Prkd1,Grin2d,Hlf,Brinp2,Rps5,Bid,Ndrg2,Ephb3,Syngr3,Cav1,Dll1,Ptgds,Capza2,Lcorl,Rnd3,Arfgef3,Myb,Pde7b,H2afy2,Vsir,Ccng1,Gnb2l1,Dynll2,Rnf144a,Asic2,Nxn,Nova1,Fos,Gpld1,Nqo2,Dbn1,Cxcl14,Adcy2,Ndufs4,Rnaseh2b,Rgcc,Clu,Nefm,Nptxr,Grina,Mapk8ip2,Pros1,Asic1,Leprel2,Cpne5,Ehd3,Lims2,Pycr1,Rps26,Shmt2,Gpr123,Prkar1b,Smyd2,Vim,Prkcq,Mdk,Mrgbp,Nmd3,Brinp1,Fmn2,Cyp2j6,…
GO:0045595	regulation of cell differentiation	62	1477	0.24	0.0034	2.46852	10090.ENSMUSP00000000707,10090.ENSMUSP00000001347,10090.ENSMUSP00000001569,10090.ENSMUSP00000001963,10090.ENSMUSP00000002765,10090.ENSMUSP00000004133,10090.ENSMUSP00000006112,10090.ENSMUSP00000007799,10090.ENSMUSP00000014917,10090.ENSMUSP00000020158,10090.ENSMUSP00000020283,10090.ENSMUSP00000020301,10090.ENSMUSP00000021674,10090.ENSMUSP00000021950,10090.ENSMUSP00000021970,10090.ENSMUSP00000022595…	Loxl3,Rnd2,Flot1,Ace,Prkd1,Brinp2,Ephb3,Cav1,Dll1,Myb,H2afy2,Vsir,Fos,Dbn1,Cxcl14,Rgcc,Clu,Nefm,Cpne5,Vim,Brinp1,Mycl,Mad2l2,Fgf13,Slc25a4,Ptchd2,Camsap2,Lppr5,Kiaa0922,Ust,S1pr2,Gli2,Dscam,Nrep,Flrt2,Pcp4,Ptprs,Nkx2-2,Dtnbp1,Bmp4,Cpne6,Brinp3,Map2,Stk24,Rac1,Syngap1,Fgfr1,Sdk1,Ccnd1,Akap5,Cpeb1,Fyn,Fndc5,Vwc2,Dmtn,Neurl1a,Hdac6,Ttc3,Bai3,Nme1,H2-D1,Asap1
GO:0030182	neuron differentiation	41	836	0.3	0.0037	2.4318	10090.ENSMUSP00000001569,10090.ENSMUSP00000006112,10090.ENSMUSP00000014917,10090.ENSMUSP00000022616,10090.ENSMUSP00000022638,10090.ENSMUSP00000023057,10090.ENSMUSP00000023291,10090.ENSMUSP00000031122,10090.ENSMUSP00000031845,10090.ENSMUSP00000034592,10090.ENSMUSP00000039707,10090.ENSMUSP00000041920,10090.ENSMUSP00000049345,10090.ENSMUSP00000052014,10090.ENSMUSP00000052306,10090.ENSMUSP00000054837…	Flot1,Ephb3,Dll1,Clu,Nefm,Nptxr,Mapk8ip2,Gabrb1,Dfna5,Dscaml1,Micall2,Camsap2,Myo16,Tenm2,D3Bwg0562e,Gli2,Dscam,Sall3,Nrep,Flrt2,Stx3,Nkx2-2,Dtnbp1,Bmp4,Map2,Stk24,Rac1,Syngap1,Fgfr1,Fry,Smarca1,Fyn,Stmn3,Tenm1,Syn1,Hdac6,Bai3,Abi1,Camsap3,Matn2,Tmem108
GO:0048813	dendrite morphogenesis	9	59	0.8	0.0043	2.36653	10090.ENSMUSP00000006112,10090.ENSMUSP00000023291,10090.ENSMUSP00000056040,10090.ENSMUSP00000072170,10090.ENSMUSP00000076577,10090.ENSMUSP00000079380,10090.ENSMUSP00000097547,10090.ENSMUSP00000111306,10090.ENSMUSP00000118491	Ephb3,Mapk8ip2,Dscam,Dtnbp1,Map2,Rac1,Fyn,Hdac6,Abi1
GO:0022604	regulation of cell morphogenesis	26	427	0.4	0.0043	2.36653	10090.ENSMUSP00000001347,10090.ENSMUSP00000006112,10090.ENSMUSP00000021950,10090.ENSMUSP00000022638,10090.ENSMUSP00000024805,10090.ENSMUSP00000028062,10090.ENSMUSP00000033473,10090.ENSMUSP00000046296,10090.ENSMUSP00000047737,10090.ENSMUSP00000052017,10090.ENSMUSP00000055122,10090.ENSMUSP00000056040,10090.ENSMUSP00000064048,10090.ENSMUSP00000072170,10090.ENSMUSP00000073847,10090.ENSMUSP00000076577…	Rnd2,Ephb3,Dbn1,Nefm,Cpne5,Vim,Fgf13,Fmnl1,S100a13,Ust,Epb4.1l2,Dscam,Ptprs,Dtnbp1,Cpne6,Map2,Rac1,Syngap1,Pxn,Akap5,Fyn,Epb4.1,Myo10,Dmtn,Ttc3,Bai3
GO:0045666	positive regulation of neuron differentiation	23	353	0.43	0.0045	2.34679	10090.ENSMUSP00000001347,10090.ENSMUSP00000002765,10090.ENSMUSP00000004133,10090.ENSMUSP00000021950,10090.ENSMUSP00000024805,10090.ENSMUSP00000030036,10090.ENSMUSP00000045121,10090.ENSMUSP00000054837,10090.ENSMUSP00000056040,10090.ENSMUSP00000062539,10090.ENSMUSP00000069666,10090.ENSMUSP00000073720,10090.ENSMUSP00000073847,10090.ENSMUSP00000074201,10090.ENSMUSP00000078746,10090.ENSMUSP00000079380…	Rnd2,Prkd1,Brinp2,Dbn1,Cpne5,Brinp1,Lppr5,Gli2,Dscam,Pcp4,Nkx2-2,Bmp4,Cpne6,Brinp3,Stk24,Rac1,Fgfr1,Akap5,Cpeb1,Fyn,Vwc2,Neurl1a,Nme1
GO:0030154	cell differentiation	103	2908	0.16	0.0051	2.29243	10090.ENSMUSP00000000707,10090.ENSMUSP00000001347,10090.ENSMUSP00000001569,10090.ENSMUSP00000001963,10090.ENSMUSP00000002765,10090.ENSMUSP00000004051,10090.ENSMUSP00000004133,10090.ENSMUSP00000004673,10090.ENSMUSP00000006112,10090.ENSMUSP00000007799,10090.ENSMUSP00000014917,10090.ENSMUSP00000020158,10090.ENSMUSP00000020301,10090.ENSMUSP00000021204,10090.ENSMUSP00000021674,10090.ENSMUSP00000021773…	Loxl3,Rnd2,Flot1,Ace,Prkd1,Hlf,Brinp2,Ndrg2,Ephb3,Cav1,Dll1,Myb,Vsir,Nxn,Fos,Gpld1,Dbn1,Clu,Nefm,Nptxr,Mapk8ip2,Cpne5,Vim,Mdk,Brinp1,Fmn2,Mycl,Mfsd2a,Ptpru,Fosl2,Gabrb1,Dfna5,Cd9,Fgf13,Dscaml1,Abhd2,Ptchd2,Micall2,Camsap2,Lppr5,Dagla,Myo16,Arxes2,Tenm2,Ust,D3Bwg0562e,Gli2,Dscam,Sall3,Nrep,Epcam,Flrt2,Pcp4,Adcyap1r1,Ptprs,Kbp,Eya2,Ackr3,Stx3,Nkx2-2,Dtnbp1,Bmp4,Cpne6,Brinp3,Rnf2,Srrm4,Map2,Dchs1,St…
GO:0010522	regulation of calcium ion transport into cytosol	10	81	0.71	0.0072	2.14267	10090.ENSMUSP00000002765,10090.ENSMUSP00000007799,10090.ENSMUSP00000061229,10090.ENSMUSP00000063784,10090.ENSMUSP00000073720,10090.ENSMUSP00000077273,10090.ENSMUSP00000093270,10090.ENSMUSP00000097547,10090.ENSMUSP00000108413,10090.ENSMUSP00000116028	Prkd1,Cav1,Mettl21c,Adcyap1r1,Bmp4,Asph,Akap5,Fyn,Cacna1c,Myo5a
GO:0031175	neuron projection development	30	554	0.35	0.0074	2.13077	10090.ENSMUSP00000001569,10090.ENSMUSP00000006112,10090.ENSMUSP00000022616,10090.ENSMUSP00000022638,10090.ENSMUSP00000023057,10090.ENSMUSP00000023291,10090.ENSMUSP00000039707,10090.ENSMUSP00000041920,10090.ENSMUSP00000049345,10090.ENSMUSP00000052014,10090.ENSMUSP00000052306,10090.ENSMUSP00000054837,10090.ENSMUSP00000056040,10090.ENSMUSP00000058132,10090.ENSMUSP00000062171,10090.ENSMUSP00000069529…	Flot1,Ephb3,Clu,Nefm,Nptxr,Mapk8ip2,Micall2,Camsap2,Myo16,Tenm2,D3Bwg0562e,Gli2,Dscam,Nrep,Flrt2,Stx3,Dtnbp1,Map2,Stk24,Rac1,Syngap1,Fgfr1,Fry,Fyn,Stmn3,Hdac6,Abi1,Camsap3,Matn2,Tmem108
GO:0048869	cellular developmental process	104	2976	0.16	0.0074	2.13077	10090.ENSMUSP00000000707,10090.ENSMUSP00000001347,10090.ENSMUSP00000001569,10090.ENSMUSP00000001963,10090.ENSMUSP00000002765,10090.ENSMUSP00000004051,10090.ENSMUSP00000004133,10090.ENSMUSP00000004673,10090.ENSMUSP00000006112,10090.ENSMUSP00000007799,10090.ENSMUSP00000014917,10090.ENSMUSP00000020158,10090.ENSMUSP00000020301,10090.ENSMUSP00000021204,10090.ENSMUSP00000021674,10090.ENSMUSP00000021773…	Loxl3,Rnd2,Flot1,Ace,Prkd1,Hlf,Brinp2,Ndrg2,Ephb3,Cav1,Dll1,Myb,Vsir,Nxn,Fos,Gpld1,Dbn1,Clu,Nefm,Nptxr,Mapk8ip2,Cpne5,Vim,Mdk,Brinp1,Fmn2,Mycl,Mfsd2a,Ptpru,Fosl2,Gabrb1,Dfna5,Cd9,Fgf13,Dscaml1,Abhd2,Ptchd2,Micall2,Camsap2,Lppr5,Dagla,Myo16,Arxes2,Tenm2,Ust,D3Bwg0562e,Gli2,Dscam,Sall3,Nrep,Epcam,Flrt2,Pcp4,Adcyap1r1,Ptprs,Kbp,Eya2,Ackr3,Stx3,Nkx2-2,Dtnbp1,Bmp4,Cpne6,Brinp3,Rnf2,Srrm4,Map2,Dchs1,St…
GO:0016358	dendrite development	11	100	0.66	0.0075	2.12494	10090.ENSMUSP00000006112,10090.ENSMUSP00000023291,10090.ENSMUSP00000056040,10090.ENSMUSP00000072170,10090.ENSMUSP00000076577,10090.ENSMUSP00000079380,10090.ENSMUSP00000080038,10090.ENSMUSP00000097547,10090.ENSMUSP00000111306,10090.ENSMUSP00000118491,10090.ENSMUSP00000128202	Ephb3,Mapk8ip2,Dscam,Dtnbp1,Map2,Rac1,Syngap1,Fyn,Hdac6,Abi1,Matn2
GO:0051924	regulation of calcium ion transport	16	203	0.51	0.0078	2.10791	10090.ENSMUSP00000001963,10090.ENSMUSP00000002765,10090.ENSMUSP00000007799,10090.ENSMUSP00000024860,10090.ENSMUSP00000058237,10090.ENSMUSP00000061229,10090.ENSMUSP00000063784,10090.ENSMUSP00000073720,10090.ENSMUSP00000077273,10090.ENSMUSP00000083077,10090.ENSMUSP00000093270,10090.ENSMUSP00000097547,10090.ENSMUSP00000107869,10090.ENSMUSP00000108413,10090.ENSMUSP00000116028,10090.ENSMUSP00000132978	Ace,Prkd1,Cav1,Ehd3,S100a1,Mettl21c,Adcyap1r1,Bmp4,Asph,Atp1a2,Akap5,Fyn,Cacna1d,Cacna1c,Myo5a,Dos
GO:1904062	regulation of cation transmembrane transport	18	252	0.47	0.009	2.04576	10090.ENSMUSP00000002765,10090.ENSMUSP00000007799,10090.ENSMUSP00000021045,10090.ENSMUSP00000023291,10090.ENSMUSP00000024860,10090.ENSMUSP00000034049,10090.ENSMUSP00000047705,10090.ENSMUSP00000058237,10090.ENSMUSP00000061229,10090.ENSMUSP00000073720,10090.ENSMUSP00000077273,10090.ENSMUSP00000083077,10090.ENSMUSP00000097547,10090.ENSMUSP00000107869,10090.ENSMUSP00000108413,10090.ENSMUSP00000116028…	Prkd1,Cav1,Asic2,Mapk8ip2,Ehd3,Slc25a4,Kcnh2,S100a1,Mettl21c,Bmp4,Asph,Atp1a2,Fyn,Cacna1d,Cacna1c,Myo5a,Kcnc1,Dos
GO:0010720	positive regulation of cell development	28	509	0.35	0.009	2.04576	10090.ENSMUSP00000001347,10090.ENSMUSP00000001963,10090.ENSMUSP00000002765,10090.ENSMUSP00000004133,10090.ENSMUSP00000021950,10090.ENSMUSP00000024805,10090.ENSMUSP00000028062,10090.ENSMUSP00000030036,10090.ENSMUSP00000034049,10090.ENSMUSP00000045121,10090.ENSMUSP00000053394,10090.ENSMUSP00000054837,10090.ENSMUSP00000056040,10090.ENSMUSP00000062539,10090.ENSMUSP00000069666,10090.ENSMUSP00000073720…	Rnd2,Ace,Prkd1,Brinp2,Dbn1,Cpne5,Vim,Brinp1,Slc25a4,Lppr5,S1pr2,Gli2,Dscam,Pcp4,Nkx2-2,Bmp4,Cpne6,Brinp3,Stk24,Rac1,Fgfr1,Akap5,Cpeb1,Fyn,Vwc2,Dmtn,Neurl1a,Nme1
GO:0051128	regulation of cellular component organization	78	2084	0.19	0.009	2.04576	10090.ENSMUSP00000001347,10090.ENSMUSP00000001569,10090.ENSMUSP00000001963,10090.ENSMUSP00000002412,10090.ENSMUSP00000002765,10090.ENSMUSP00000004560,10090.ENSMUSP00000006112,10090.ENSMUSP00000007799,10090.ENSMUSP00000014917,10090.ENSMUSP00000015877,10090.ENSMUSP00000020158,10090.ENSMUSP00000020640,10090.ENSMUSP00000021045,10090.ENSMUSP00000021950,10090.ENSMUSP00000022595,10090.ENSMUSP00000022616…	Rnd2,Flot1,Ace,Ncan,Prkd1,Bid,Ephb3,Cav1,Dll1,Capza2,Myb,Gnb2l1,Asic2,Dbn1,Rgcc,Clu,Nefm,Pros1,Cpne5,Ehd3,Vim,Prkcq,Fmn2,Mad2l2,Mfge8,Fgf13,Slc25a4,Pik3r2,Camsap2,Lppr5,Fmnl1,S100a13,Trim37,Tenm2,Ust,Epb4.1l2,Dscam,Flrt2,Pcp4,Ptprs,Sh3bp4,Iqgap2,Dtnbp1,Bmp4,Cpne6,Map2,Asph,Stk24,Rac1,Syngap1,Fgfr1,Sdk1,Pxn,Gda,Tbc1d9,Akap5,Cpeb1,Fyn,Prkcg,Stmn3,Nsf,Stam,Epb4.1,Myo10,Dmtn,Neurl1a,Lrtm2,Tenm1,Hdac6…
GO:0044093	positive regulation of molecular function	58	1422	0.22	0.0095	2.02228	10090.ENSMUSP00000001569,10090.ENSMUSP00000001963,10090.ENSMUSP00000002765,10090.ENSMUSP00000004560,10090.ENSMUSP00000007236,10090.ENSMUSP00000007799,10090.ENSMUSP00000020640,10090.ENSMUSP00000020775,10090.ENSMUSP00000021045,10090.ENSMUSP00000021773,10090.ENSMUSP00000022595,10090.ENSMUSP00000022616,10090.ENSMUSP00000023291,10090.ENSMUSP00000024860,10090.ENSMUSP00000028118,10090.ENSMUSP00000029358…	Flot1,Ace,Prkd1,Bid,Syngr3,Cav1,Gnb2l1,Dynll2,Asic2,Gpld1,Rgcc,Clu,Mapk8ip2,Ehd3,Prkcq,Nmd3,Fgf13,Slc25a4,Chn2,Fam65a,Ddx58,Trim37,Eef1a2,Pnlip,Lcp2,S100a1,Vav2,Adcyap1r1,Nkx2-2,Bmp4,Asph,Stk24,Rac1,Syngap1,Fgfr1,Pxn,Tbc1d9,Arhgap42,Ccnd1,Akap5,Fyn,Epb4.1,Sipa1l2,Afap1l2,Neurl1a,Cacna1d,Col4a3,Eda2r,Tenm1,Zcchc12,Inava,Bai3,Nme1,Abi1,Kcnc1,Ctbp2,Plce1,Asap1
GO:0042221	response to chemical	101	2902	0.16	0.0096	2.01773	10090.ENSMUSP00000001569,10090.ENSMUSP00000001963,10090.ENSMUSP00000002765,10090.ENSMUSP00000004133,10090.ENSMUSP00000004560,10090.ENSMUSP00000006112,10090.ENSMUSP00000007799,10090.ENSMUSP00000015234,10090.ENSMUSP00000020158,10090.ENSMUSP00000020301,10090.ENSMUSP00000020640,10090.ENSMUSP00000021045,10090.ENSMUSP00000021204,10090.ENSMUSP00000021231,10090.ENSMUSP00000021674,10090.ENSMUSP00000021773…	Flot1,Ace,Prkd1,Brinp2,Bid,Ephb3,Cav1,Ptgds,Myb,Vsir,Gnb2l1,Asic2,Nxn,Abcc3,Fos,Gpld1,Dbn1,Cxcl14,Adcy2,Ndufs4,Rgcc,Clu,Asic1,Pycr1,Shmt2,Vim,Prkcq,Mdk,Brinp1,Fmn2,Cyp2j6,Ptpru,Fosl2,Gabrb1,Asns,Dfna5,Timp4,Cd9,Fgf13,Bgn,Slc25a4,Mt2,Pik3r2,Acat1,Abhd2,Htr5a,Fam65a,Ddx58,Kcnh2,Tenm2,Eef1a2,Gli2,Mettl21c,Flrt2,Adcyap1r1,Zfp580,Sh3bp4,Ackr3,Nkx2-2,Bsg,Bmp4,Cpne6,Brinp3,Abtb2,Map2,Asph,Kcnk2,Stk24,Ra…
GO:0065009	regulation of molecular function	93	2620	0.16	0.0098	2.00877	10090.ENSMUSP00000001569,10090.ENSMUSP00000001963,10090.ENSMUSP00000002765,10090.ENSMUSP00000004560,10090.ENSMUSP00000006112,10090.ENSMUSP00000007236,10090.ENSMUSP00000007799,10090.ENSMUSP00000019999,10090.ENSMUSP00000020640,10090.ENSMUSP00000020775,10090.ENSMUSP00000021045,10090.ENSMUSP00000021773,10090.ENSMUSP00000021950,10090.ENSMUSP00000021970,10090.ENSMUSP00000022013,10090.ENSMUSP00000022595…	Flot1,Ace,Prkd1,Bid,Ephb3,Syngr3,Cav1,Arfgef3,Gnb2l1,Dynll2,Asic2,Gpld1,Dbn1,Cxcl14,Adcy2,Rgcc,Clu,Mapk8ip2,Ehd3,Prkar1b,Prkcq,Mdk,Nmd3,Mad2l2,Prkab1,Timp4,Fgf13,Bgn,Slc25a4,Pik3r2,Chn2,Fam65a,Ddx58,Nenf,Trim37,Eef1a2,Pnlip,Lcp2,S100a1,Flrt2,Pcp4,Vav2,Adcyap1r1,Sh3bp4,Iqgap2,Nkx2-2,Dtnbp1,Bmp4,Rnf2,Asph,Kcnk2,Stk24,Rac1,Syngap1,Fgfr1,Atp1a2,Pxn,Fry,Tbc1d9,Arhgef40,Arhgap42,Ccnd1,Akap5,Fyn,Stmn3,F…
GO:0022603	regulation of anatomical structure morphogenesis	40	866	0.28	0.011	1.95861	10090.ENSMUSP00000001347,10090.ENSMUSP00000001569,10090.ENSMUSP00000002765,10090.ENSMUSP00000006112,10090.ENSMUSP00000014917,10090.ENSMUSP00000020640,10090.ENSMUSP00000021950,10090.ENSMUSP00000022595,10090.ENSMUSP00000022638,10090.ENSMUSP00000024805,10090.ENSMUSP00000025254,10090.ENSMUSP00000028062,10090.ENSMUSP00000033473,10090.ENSMUSP00000034296,10090.ENSMUSP00000046296,10090.ENSMUSP00000047737…	Rnd2,Flot1,Prkd1,Ephb3,Dll1,Gnb2l1,Dbn1,Rgcc,Nefm,Cpne5,Lims2,Vim,Fgf13,Pik3r2,Fmnl1,S100a13,Ust,Epb4.1l2,Dscam,S100a1,Ptprs,Dtnbp1,Bmp4,Cpne6,Map2,Rac1,Syngap1,Fgfr1,Pxn,Akap5,Fyn,Sapcd2,Epb4.1,Sulf2,Myo10,Dmtn,Akt3,Col4a3,Ttc3,Bai3
GO:0044089	positive regulation of cellular component biogenesis	25	444	0.36	0.0137	1.86328	10090.ENSMUSP00000001569,10090.ENSMUSP00000004560,10090.ENSMUSP00000006112,10090.ENSMUSP00000007799,10090.ENSMUSP00000020640,10090.ENSMUSP00000021045,10090.ENSMUSP00000022595,10090.ENSMUSP00000022616,10090.ENSMUSP00000028118,10090.ENSMUSP00000030039,10090.ENSMUSP00000045121,10090.ENSMUSP00000052014,10090.ENSMUSP00000062171,10090.ENSMUSP00000067685,10090.ENSMUSP00000079380,10090.ENSMUSP00000083709…	Flot1,Bid,Ephb3,Cav1,Gnb2l1,Asic2,Rgcc,Clu,Prkcq,Fmn2,Lppr5,Tenm2,Flrt2,Iqgap2,Rac1,Pxn,Gda,Stam,Neurl1a,Lrtm2,Tenm1,Hdac6,Lphn3,Bai3,Asap1
GO:0048583	regulation of response to stimulus	104	3045	0.15	0.0138	1.86012	10090.ENSMUSP00000000707,10090.ENSMUSP00000001569,10090.ENSMUSP00000001963,10090.ENSMUSP00000002765,10090.ENSMUSP00000004560,10090.ENSMUSP00000004673,10090.ENSMUSP00000007799,10090.ENSMUSP00000014917,10090.ENSMUSP00000019999,10090.ENSMUSP00000020158,10090.ENSMUSP00000020301,10090.ENSMUSP00000020640,10090.ENSMUSP00000021204,10090.ENSMUSP00000021773,10090.ENSMUSP00000021843,10090.ENSMUSP00000021950…	Loxl3,Flot1,Ace,Prkd1,Bid,Ndrg2,Cav1,Dll1,Arfgef3,Myb,Vsir,Gnb2l1,Nxn,Gpld1,Nqo2,Dbn1,Cxcl14,Rnaseh2b,Rgcc,Clu,Grina,Mapk8ip2,Pros1,Lims2,Pycr1,Smyd2,Prkcq,Mdk,Cyp2j6,Mad2l2,Dfna5,Cd9,Fgf13,Bgn,Slc25a4,Pik3r2,Fam65a,Ddx58,Nenf,S100a13,Kiaa0922,S1pr2,Gli2,Dscam,Lcp2,Sall3,Nrep,Samhd1,Flrt2,Pcp4,Vav2,Adcyap1r1,Ptprs,Zfp580,Eya2,Sh3bp4,Ackr3,Stx3,Dtnbp1,Bmp4,Asph,Kcnk2,Stk24,Rac1,Syngap1,Fgfr1,Pxn,G…
GO:1902903	regulation of supramolecular fiber organization	19	291	0.43	0.0143	1.84466	10090.ENSMUSP00000007799,10090.ENSMUSP00000015877,10090.ENSMUSP00000021950,10090.ENSMUSP00000022595,10090.ENSMUSP00000022616,10090.ENSMUSP00000028118,10090.ENSMUSP00000030039,10090.ENSMUSP00000033473,10090.ENSMUSP00000034296,10090.ENSMUSP00000041920,10090.ENSMUSP00000067685,10090.ENSMUSP00000076577,10090.ENSMUSP00000079380,10090.ENSMUSP00000083709,10090.ENSMUSP00000084882,10090.ENSMUSP00000106612…	Cav1,Capza2,Dbn1,Rgcc,Clu,Prkcq,Fmn2,Fgf13,Pik3r2,Camsap2,Iqgap2,Map2,Rac1,Pxn,Gda,Dmtn,Tenm1,Hdac6,Camsap3
GO:0050769	positive regulation of neurogenesis	25	448	0.36	0.0147	1.83268	10090.ENSMUSP00000001347,10090.ENSMUSP00000001963,10090.ENSMUSP00000002765,10090.ENSMUSP00000004133,10090.ENSMUSP00000021950,10090.ENSMUSP00000024805,10090.ENSMUSP00000028062,10090.ENSMUSP00000030036,10090.ENSMUSP00000045121,10090.ENSMUSP00000054837,10090.ENSMUSP00000056040,10090.ENSMUSP00000062539,10090.ENSMUSP00000069666,10090.ENSMUSP00000073720,10090.ENSMUSP00000073847,10090.ENSMUSP00000074201…	Rnd2,Ace,Prkd1,Brinp2,Dbn1,Cpne5,Vim,Brinp1,Lppr5,Gli2,Dscam,Pcp4,Nkx2-2,Bmp4,Cpne6,Brinp3,Stk24,Rac1,Fgfr1,Akap5,Cpeb1,Fyn,Vwc2,Neurl1a,Nme1
GO:2000047	regulation of cell-cell adhesion mediated by cadherin	4	9	1.26	0.016	1.79588	10090.ENSMUSP00000001569,10090.ENSMUSP00000022595,10090.ENSMUSP00000030860,10090.ENSMUSP00000061935	Flot1,Rgcc,Mad2l2,Epcam
GO:0051240	positive regulation of multicellular organismal process	57	1432	0.21	0.0171	1.767	10090.ENSMUSP00000001347,10090.ENSMUSP00000001569,10090.ENSMUSP00000001963,10090.ENSMUSP00000002765,10090.ENSMUSP00000004133,10090.ENSMUSP00000006112,10090.ENSMUSP00000007799,10090.ENSMUSP00000014917,10090.ENSMUSP00000020158,10090.ENSMUSP00000020283,10090.ENSMUSP00000020640,10090.ENSMUSP00000021045,10090.ENSMUSP00000021674,10090.ENSMUSP00000021773,10090.ENSMUSP00000021950,10090.ENSMUSP00000022595…	Rnd2,Flot1,Ace,Prkd1,Brinp2,Ephb3,Cav1,Dll1,Myb,H2afy2,Gnb2l1,Asic2,Fos,Gpld1,Dbn1,Rgcc,Clu,Cpne5,Vim,Prkcq,Brinp1,Cyp2j6,Mad2l2,Slc25a4,Ddx58,Lppr5,Gli2,Dscam,S100a1,Flrt2,Pcp4,Zfp580,Nkx2-2,Bmp4,Cpne6,Brinp3,Stk24,Rac1,Fgfr1,Pxn,Ccnd1,Akap5,Cpeb1,Fyn,Sulf2,Vwc2,Dmtn,Akt3,Afap1l2,Neurl1a,Lrtm2,Hdac6,Lphn3,Inava,Bai3,Nme1,Fcgr3
GO:0031110	regulation of microtubule polymerization or depolymerization	9	78	0.68	0.0179	1.74715	10090.ENSMUSP00000007799,10090.ENSMUSP00000033473,10090.ENSMUSP00000041920,10090.ENSMUSP00000076577,10090.ENSMUSP00000079380,10090.ENSMUSP00000084882,10090.ENSMUSP00000099334,10090.ENSMUSP00000111306,10090.ENSMUSP00000125993	Cav1,Fgf13,Camsap2,Map2,Rac1,Gda,Stmn3,Hdac6,Camsap3
GO:0051130	positive regulation of cellular component organization	45	1053	0.24	0.019	1.72125	10090.ENSMUSP00000001347,10090.ENSMUSP00000001569,10090.ENSMUSP00000002765,10090.ENSMUSP00000004560,10090.ENSMUSP00000006112,10090.ENSMUSP00000007799,10090.ENSMUSP00000014917,10090.ENSMUSP00000020158,10090.ENSMUSP00000020640,10090.ENSMUSP00000021045,10090.ENSMUSP00000021950,10090.ENSMUSP00000022595,10090.ENSMUSP00000022616,10090.ENSMUSP00000023629,10090.ENSMUSP00000024805,10090.ENSMUSP00000028118…	Rnd2,Flot1,Prkd1,Bid,Ephb3,Cav1,Dll1,Myb,Gnb2l1,Asic2,Dbn1,Rgcc,Clu,Pros1,Cpne5,Prkcq,Fmn2,Mfge8,Lppr5,Tenm2,Dscam,Flrt2,Pcp4,Iqgap2,Dtnbp1,Bmp4,Cpne6,Stk24,Rac1,Fgfr1,Pxn,Gda,Akap5,Cpeb1,Fyn,Dmtn,Neurl1a,Lrtm2,Tenm1,Hdac6,Lphn3,Bai3,Nme1,Fcgr3,Asap1
GO:0044854	plasma membrane raft assembly	3	3	1.61	0.0199	1.70115	10090.ENSMUSP00000001569,10090.ENSMUSP00000007799,10090.ENSMUSP00000130098	Flot1,Cav1,Pacsin2
GO:0120036	plasma membrane bounded cell projection organization	39	871	0.27	0.0199	1.70115	10090.ENSMUSP00000001569,10090.ENSMUSP00000006112,10090.ENSMUSP00000020775,10090.ENSMUSP00000022616,10090.ENSMUSP00000022638,10090.ENSMUSP00000023057,10090.ENSMUSP00000023291,10090.ENSMUSP00000024860,10090.ENSMUSP00000034521,10090.ENSMUSP00000039707,10090.ENSMUSP00000041920,10090.ENSMUSP00000049345,10090.ENSMUSP00000052014,10090.ENSMUSP00000052306,10090.ENSMUSP00000053394,10090.ENSMUSP00000054837…	Flot1,Ephb3,Dynll2,Clu,Nefm,Nptxr,Mapk8ip2,Ehd3,Jhy,Micall2,Camsap2,Myo16,Tenm2,D3Bwg0562e,S1pr2,Gli2,Dscam,Nrep,Flrt2,Vav2,Stx3,Dtnbp1,Map2,Stk24,Rac1,Syngap1,Fgfr1,Pxn,Fry,Fyn,Stmn3,Ssx2ip,Neurl1a,Hdac6,Abi1,Camsap3,Matn2,Asap1,Tmem108
GO:0030030	cell projection organization	40	907	0.26	0.0219	1.65956	10090.ENSMUSP00000001569,10090.ENSMUSP00000006112,10090.ENSMUSP00000020775,10090.ENSMUSP00000022616,10090.ENSMUSP00000022638,10090.ENSMUSP00000023057,10090.ENSMUSP00000023291,10090.ENSMUSP00000024860,10090.ENSMUSP00000034521,10090.ENSMUSP00000039707,10090.ENSMUSP00000041920,10090.ENSMUSP00000049345,10090.ENSMUSP00000052014,10090.ENSMUSP00000052306,10090.ENSMUSP00000053394,10090.ENSMUSP00000054837…	Flot1,Ephb3,Dynll2,Clu,Nefm,Nptxr,Mapk8ip2,Ehd3,Jhy,Micall2,Camsap2,Myo16,Tenm2,D3Bwg0562e,S1pr2,Gli2,Dscam,Nrep,Flrt2,Vav2,Stx3,Dtnbp1,Map2,Stk24,Rac1,Syngap1,Fgfr1,Pxn,Fry,Fyn,Stmn3,Ssx2ip,Neurl1a,Hdac6,Abi1,Camsap3,Matn2,Pacsin2,Asap1,Tmem108
GO:1903169	regulation of calcium ion transmembrane transport	11	121	0.57	0.0228	1.64207	10090.ENSMUSP00000002765,10090.ENSMUSP00000024860,10090.ENSMUSP00000058237,10090.ENSMUSP00000061229,10090.ENSMUSP00000073720,10090.ENSMUSP00000077273,10090.ENSMUSP00000083077,10090.ENSMUSP00000097547,10090.ENSMUSP00000108413,10090.ENSMUSP00000116028,10090.ENSMUSP00000132978	Prkd1,Ehd3,S100a1,Mettl21c,Bmp4,Asph,Atp1a2,Fyn,Cacna1c,Myo5a,Dos
GO:0050890	cognition	17	257	0.43	0.0228	1.64207	10090.ENSMUSP00000021674,10090.ENSMUSP00000021843,10090.ENSMUSP00000023291,10090.ENSMUSP00000023758,10090.ENSMUSP00000026973,10090.ENSMUSP00000028672,10090.ENSMUSP00000030036,10090.ENSMUSP00000033473,10090.ENSMUSP00000040072,10090.ENSMUSP00000071687,10090.ENSMUSP00000078416,10090.ENSMUSP00000080038,10090.ENSMUSP00000083077,10090.ENSMUSP00000097874,10090.ENSMUSP00000108413,10090.ENSMUSP00000109089…	Fos,Nqo2,Mapk8ip2,Asic1,Prkar1b,Mdk,Brinp1,Fgf13,Sobp,Nptx2,Kcnk2,Syngap1,Atp1a2,Prkcg,Cacna1c,Nrxn2,Bai3
GO:0007611	learning or memory	16	234	0.45	0.0234	1.63078	10090.ENSMUSP00000021674,10090.ENSMUSP00000021843,10090.ENSMUSP00000023291,10090.ENSMUSP00000023758,10090.ENSMUSP00000026973,10090.ENSMUSP00000028672,10090.ENSMUSP00000030036,10090.ENSMUSP00000033473,10090.ENSMUSP00000071687,10090.ENSMUSP00000078416,10090.ENSMUSP00000080038,10090.ENSMUSP00000083077,10090.ENSMUSP00000097874,10090.ENSMUSP00000108413,10090.ENSMUSP00000109089,10090.ENSMUSP00000116231	Fos,Nqo2,Mapk8ip2,Asic1,Prkar1b,Mdk,Brinp1,Fgf13,Nptx2,Kcnk2,Syngap1,Atp1a2,Prkcg,Cacna1c,Nrxn2,Bai3
GO:0007420	brain development	30	612	0.3	0.0235	1.62893	10090.ENSMUSP00000001304,10090.ENSMUSP00000004560,10090.ENSMUSP00000004673,10090.ENSMUSP00000006112,10090.ENSMUSP00000014917,10090.ENSMUSP00000020283,10090.ENSMUSP00000022286,10090.ENSMUSP00000028672,10090.ENSMUSP00000030408,10090.ENSMUSP00000032492,10090.ENSMUSP00000033473,10090.ENSMUSP00000034521,10090.ENSMUSP00000034547,10090.ENSMUSP00000034592,10090.ENSMUSP00000038884,10090.ENSMUSP00000049345…	Ckb,Bid,Ndrg2,Ephb3,Dll1,H2afy2,Ndufs4,Mdk,Mfsd2a,Cd9,Fgf13,Jhy,Acat1,Dscaml1,Htr5a,Myo16,Gli2,Sall3,Ptprs,Bmp4,Rac1,Fgfr1,Smarca1,Fyn,Macrod2,Akt3,Neurl1a,Nme1,Kcnc1,Tmem108
GO:0051094	positive regulation of developmental process	49	1201	0.22	0.0242	1.61618	10090.ENSMUSP00000001347,10090.ENSMUSP00000001569,10090.ENSMUSP00000001963,10090.ENSMUSP00000002765,10090.ENSMUSP00000004133,10090.ENSMUSP00000006112,10090.ENSMUSP00000014917,10090.ENSMUSP00000020158,10090.ENSMUSP00000020283,10090.ENSMUSP00000020301,10090.ENSMUSP00000020640,10090.ENSMUSP00000021045,10090.ENSMUSP00000021674,10090.ENSMUSP00000021950,10090.ENSMUSP00000022595,10090.ENSMUSP00000022616…	Rnd2,Flot1,Ace,Prkd1,Brinp2,Ephb3,Dll1,Myb,H2afy2,Vsir,Gnb2l1,Asic2,Fos,Dbn1,Rgcc,Clu,Cpne5,Vim,Brinp1,Mad2l2,Slc25a4,Lppr5,S1pr2,Gli2,Dscam,S100a1,Flrt2,Pcp4,Nkx2-2,Bmp4,Cpne6,Brinp3,Stk24,Rac1,Fgfr1,Pxn,Ccnd1,Akap5,Cpeb1,Fyn,Fndc5,Vwc2,Dmtn,Akt3,Neurl1a,Lrtm2,Lphn3,Bai3,Nme1
GO:0010769	regulation of cell morphogenesis involved in differentiation	17	263	0.42	0.027	1.56864	10090.ENSMUSP00000001347,10090.ENSMUSP00000006112,10090.ENSMUSP00000021950,10090.ENSMUSP00000022638,10090.ENSMUSP00000028062,10090.ENSMUSP00000033473,10090.ENSMUSP00000052017,10090.ENSMUSP00000056040,10090.ENSMUSP00000064048,10090.ENSMUSP00000072170,10090.ENSMUSP00000076577,10090.ENSMUSP00000079380,10090.ENSMUSP00000080038,10090.ENSMUSP00000093270,10090.ENSMUSP00000106612,10090.ENSMUSP00000112801…	Rnd2,Ephb3,Dbn1,Nefm,Vim,Fgf13,Ust,Dscam,Ptprs,Dtnbp1,Map2,Rac1,Syngap1,Akap5,Dmtn,Ttc3,Bai3
GO:0022610	biological adhesion	29	591	0.3	0.0278	1.55596	10090.ENSMUSP00000002412,10090.ENSMUSP00000006112,10090.ENSMUSP00000025254,10090.ENSMUSP00000030741,10090.ENSMUSP00000032492,10090.ENSMUSP00000032825,10090.ENSMUSP00000034592,10090.ENSMUSP00000039707,10090.ENSMUSP00000039888,10090.ENSMUSP00000052014,10090.ENSMUSP00000054774,10090.ENSMUSP00000056040,10090.ENSMUSP00000061935,10090.ENSMUSP00000062171,10090.ENSMUSP00000064048,10090.ENSMUSP00000069114…	Ncan,Ephb3,Lims2,Ptpru,Cd9,Mfge8,Dscaml1,Micall2,Pcdha1,Tenm2,Pcdh20,Dscam,Epcam,Flrt2,Ptprs,Ackr3,Dchs1,Rac1,Sdk1,Pxn,Selplg,Ssx2ip,Gbp3,Col4a3,Nrxn2,Tenm1,Lphn3,Cdh8,Camsap3
GO:0023051	regulation of signaling	92	2692	0.15	0.0278	1.55596	10090.ENSMUSP00000000707,10090.ENSMUSP00000001569,10090.ENSMUSP00000002765,10090.ENSMUSP00000004560,10090.ENSMUSP00000004673,10090.ENSMUSP00000007799,10090.ENSMUSP00000014917,10090.ENSMUSP00000019999,10090.ENSMUSP00000020301,10090.ENSMUSP00000020640,10090.ENSMUSP00000021204,10090.ENSMUSP00000021773,10090.ENSMUSP00000021843,10090.ENSMUSP00000021950,10090.ENSMUSP00000021970,10090.ENSMUSP00000022616…	Loxl3,Flot1,Prkd1,Bid,Ndrg2,Cav1,Dll1,Arfgef3,Vsir,Gnb2l1,Nxn,Gpld1,Nqo2,Dbn1,Cxcl14,Clu,Grina,Mapk8ip2,Asic1,Ehd3,Lims2,Smyd2,Prkcq,Mdk,Cyp2j6,Mad2l2,Nsg1,Dfna5,Fgf13,Bgn,Pik3r2,Fam65a,Nenf,S100a13,Kiaa0922,S1pr2,Gli2,Sall3,Nrep,Pfkm,Flrt2,Vav2,Adcyap1r1,Ptprs,Eya2,Sh3bp4,Ackr3,Stx3,Dtnbp1,Bmp4,Asph,Stk24,Rac1,Syngap1,Fgfr1,Pxn,Grb10,Arhgef40,Arhgap42,Ccnd1,Akap5,Cpeb1,Fyn,Stmn3,Nsf,Fgf11,Fndc5,…
GO:2000048	negative regulation of cell-cell adhesion mediated by cadherin	3	4	1.49	0.0283	1.54821	10090.ENSMUSP00000022595,10090.ENSMUSP00000030860,10090.ENSMUSP00000061935	Rgcc,Mad2l2,Epcam
GO:0010959	regulation of metal ion transport	19	318	0.39	0.0299	1.52433	10090.ENSMUSP00000001963,10090.ENSMUSP00000002765,10090.ENSMUSP00000007799,10090.ENSMUSP00000024860,10090.ENSMUSP00000047705,10090.ENSMUSP00000058237,10090.ENSMUSP00000061229,10090.ENSMUSP00000063784,10090.ENSMUSP00000073720,10090.ENSMUSP00000077273,10090.ENSMUSP00000083077,10090.ENSMUSP00000093270,10090.ENSMUSP00000097547,10090.ENSMUSP00000106789,10090.ENSMUSP00000107869,10090.ENSMUSP00000108413…	Ace,Prkd1,Cav1,Ehd3,Kcnh2,S100a1,Mettl21c,Adcyap1r1,Bmp4,Asph,Atp1a2,Akap5,Fyn,Akt3,Cacna1d,Cacna1c,Myo5a,Kcnc1,Dos
GO:0043269	regulation of ion transport	27	540	0.31	0.0314	1.50307	10090.ENSMUSP00000001963,10090.ENSMUSP00000002765,10090.ENSMUSP00000007799,10090.ENSMUSP00000021045,10090.ENSMUSP00000023291,10090.ENSMUSP00000024860,10090.ENSMUSP00000034049,10090.ENSMUSP00000046864,10090.ENSMUSP00000047705,10090.ENSMUSP00000049206,10090.ENSMUSP00000058237,10090.ENSMUSP00000061229,10090.ENSMUSP00000062539,10090.ENSMUSP00000063784,10090.ENSMUSP00000072170,10090.ENSMUSP00000073720…	Ace,Prkd1,Cav1,Asic2,Mapk8ip2,Ehd3,Slc25a4,Kcnh5,Kcnh2,Kcnh8,S100a1,Mettl21c,Pcp4,Adcyap1r1,Dtnbp1,Bmp4,Asph,Fgfr1,Atp1a2,Akap5,Fyn,Akt3,Cacna1d,Cacna1c,Myo5a,Kcnc1,Dos
GO:0060322	head development	31	657	0.29	0.0314	1.50307	10090.ENSMUSP00000001304,10090.ENSMUSP00000004560,10090.ENSMUSP00000004673,10090.ENSMUSP00000006112,10090.ENSMUSP00000014917,10090.ENSMUSP00000020283,10090.ENSMUSP00000022286,10090.ENSMUSP00000028672,10090.ENSMUSP00000030408,10090.ENSMUSP00000032492,10090.ENSMUSP00000033473,10090.ENSMUSP00000034521,10090.ENSMUSP00000034547,10090.ENSMUSP00000034592,10090.ENSMUSP00000038884,10090.ENSMUSP00000049345…	Ckb,Bid,Ndrg2,Ephb3,Dll1,H2afy2,Ndufs4,Mdk,Mfsd2a,Cd9,Fgf13,Jhy,Acat1,Dscaml1,Htr5a,Myo16,Gli2,Sall3,Ptprs,Bmp4,Asph,Rac1,Fgfr1,Smarca1,Fyn,Macrod2,Akt3,Neurl1a,Nme1,Kcnc1,Tmem108
GO:0045937	positive regulation of phosphate metabolic process	39	903	0.25	0.0317	1.49894	10090.ENSMUSP00000001569,10090.ENSMUSP00000001963,10090.ENSMUSP00000002765,10090.ENSMUSP00000007799,10090.ENSMUSP00000020640,10090.ENSMUSP00000021773,10090.ENSMUSP00000021843,10090.ENSMUSP00000022595,10090.ENSMUSP00000022616,10090.ENSMUSP00000023291,10090.ENSMUSP00000030860,10090.ENSMUSP00000031845,10090.ENSMUSP00000033473,10090.ENSMUSP00000046311,10090.ENSMUSP00000053394,10090.ENSMUSP00000054556…	Flot1,Ace,Prkd1,Cav1,Gnb2l1,Gpld1,Nqo2,Rgcc,Clu,Mapk8ip2,Mad2l2,Dfna5,Fgf13,Nenf,S1pr2,Eef1a2,Dscam,Lcp2,Vav2,Adcyap1r1,Ackr3,Dtnbp1,Bmp4,Stk24,Rac1,Fgfr1,Pxn,Grb10,Ccnd1,Akap5,Fyn,Afap1l2,Neurl1a,Eda2r,Tenm1,Hdac6,Inava,Abi1,Plce1
GO:0032879	regulation of localization	78	2210	0.16	0.0317	1.49894	10090.ENSMUSP00000001569,10090.ENSMUSP00000001963,10090.ENSMUSP00000002765,10090.ENSMUSP00000007236,10090.ENSMUSP00000007799,10090.ENSMUSP00000014917,10090.ENSMUSP00000020640,10090.ENSMUSP00000021045,10090.ENSMUSP00000021773,10090.ENSMUSP00000021950,10090.ENSMUSP00000021970,10090.ENSMUSP00000022595,10090.ENSMUSP00000022616,10090.ENSMUSP00000023291,10090.ENSMUSP00000023629,10090.ENSMUSP00000023758…	Flot1,Ace,Prkd1,Syngr3,Cav1,Dll1,Gnb2l1,Asic2,Gpld1,Dbn1,Cxcl14,Rgcc,Clu,Mapk8ip2,Pros1,Asic1,Ehd3,Vim,Prkcq,Nmd3,Cyp2j6,Ptpru,Cd9,Mfge8,Fgf13,Slc25a4,Pik3r2,Abhd2,Fam65a,Ddx58,Kcnh5,Kcnh2,Kcnh8,Epb4.1l2,Dscam,S100a1,Pfkm,Mettl21c,Epcam,Flrt2,Pcp4,Adcyap1r1,Zfp580,Ackr3,Stx3,Syt5,Dtnbp1,Bmp4,Map2,Asph,Stk24,Rac1,Fgfr1,Atp1a2,Grb10,Tbc1d9,Akap5,Cpeb1,Fyn,Prkcg,Sapcd2,Nsf,Stam,Epb4.1,Ssx2ip,Dmtn,Ak…
GO:0042327	positive regulation of phosphorylation	37	846	0.25	0.0341	1.46725	10090.ENSMUSP00000001569,10090.ENSMUSP00000001963,10090.ENSMUSP00000002765,10090.ENSMUSP00000007799,10090.ENSMUSP00000020640,10090.ENSMUSP00000021843,10090.ENSMUSP00000022595,10090.ENSMUSP00000022616,10090.ENSMUSP00000023291,10090.ENSMUSP00000030860,10090.ENSMUSP00000031845,10090.ENSMUSP00000033473,10090.ENSMUSP00000046311,10090.ENSMUSP00000053394,10090.ENSMUSP00000054556,10090.ENSMUSP00000056040…	Flot1,Ace,Prkd1,Cav1,Gnb2l1,Nqo2,Rgcc,Clu,Mapk8ip2,Mad2l2,Dfna5,Fgf13,Nenf,S1pr2,Eef1a2,Dscam,Lcp2,Vav2,Ackr3,Dtnbp1,Bmp4,Stk24,Rac1,Fgfr1,Pxn,Grb10,Ccnd1,Akap5,Fyn,Afap1l2,Neurl1a,Eda2r,Tenm1,Hdac6,Inava,Abi1,Plce1
GO:0032409	regulation of transporter activity	14	200	0.46	0.0358	1.44612	10090.ENSMUSP00000007236,10090.ENSMUSP00000007799,10090.ENSMUSP00000021045,10090.ENSMUSP00000023291,10090.ENSMUSP00000024860,10090.ENSMUSP00000034049,10090.ENSMUSP00000058237,10090.ENSMUSP00000073720,10090.ENSMUSP00000077273,10090.ENSMUSP00000083077,10090.ENSMUSP00000107869,10090.ENSMUSP00000116028,10090.ENSMUSP00000124938,10090.ENSMUSP00000132978	Syngr3,Cav1,Asic2,Mapk8ip2,Ehd3,Slc25a4,S100a1,Bmp4,Asph,Atp1a2,Cacna1d,Myo5a,Kcnc1,Dos
GO:0098742	cell-cell adhesion via plasma-membrane adhesion molecules	11	133	0.53	0.0376	1.42481	10090.ENSMUSP00000034592,10090.ENSMUSP00000039888,10090.ENSMUSP00000052014,10090.ENSMUSP00000054774,10090.ENSMUSP00000056040,10090.ENSMUSP00000061935,10090.ENSMUSP00000077574,10090.ENSMUSP00000082928,10090.ENSMUSP00000110711,10090.ENSMUSP00000113482,10090.ENSMUSP00000117326	Dscaml1,Pcdha1,Tenm2,Pcdh20,Dscam,Epcam,Dchs1,Sdk1,Tenm1,Lphn3,Cdh8
GO:0050803	regulation of synapse structure or activity	12	155	0.5	0.0376	1.42481	10090.ENSMUSP00000002412,10090.ENSMUSP00000006112,10090.ENSMUSP00000021045,10090.ENSMUSP00000021950,10090.ENSMUSP00000062171,10090.ENSMUSP00000072170,10090.ENSMUSP00000080038,10090.ENSMUSP00000097547,10090.ENSMUSP00000107439,10090.ENSMUSP00000108376,10090.ENSMUSP00000113482,10090.ENSMUSP00000116231	Ncan,Ephb3,Asic2,Dbn1,Flrt2,Dtnbp1,Syngap1,Fyn,Neurl1a,Lrtm2,Lphn3,Bai3
GO:0000160	phosphorelay signal transduction system	3	5	1.39	0.0384	1.41567	10090.ENSMUSP00000046864,10090.ENSMUSP00000047705,10090.ENSMUSP00000049206	Kcnh5,Kcnh2,Kcnh8
GO:0034765	regulation of ion transmembrane transport	20	358	0.36	0.0406	1.39147	10090.ENSMUSP00000002765,10090.ENSMUSP00000007799,10090.ENSMUSP00000021045,10090.ENSMUSP00000023291,10090.ENSMUSP00000024860,10090.ENSMUSP00000034049,10090.ENSMUSP00000046864,10090.ENSMUSP00000047705,10090.ENSMUSP00000049206,10090.ENSMUSP00000058237,10090.ENSMUSP00000061229,10090.ENSMUSP00000073720,10090.ENSMUSP00000077273,10090.ENSMUSP00000083077,10090.ENSMUSP00000097547,10090.ENSMUSP00000107869…	Prkd1,Cav1,Asic2,Mapk8ip2,Ehd3,Slc25a4,Kcnh5,Kcnh2,Kcnh8,S100a1,Mettl21c,Bmp4,Asph,Atp1a2,Fyn,Cacna1d,Cacna1c,Myo5a,Kcnc1,Dos
GO:0007155	cell adhesion	28	584	0.29	0.0406	1.39147	10090.ENSMUSP00000002412,10090.ENSMUSP00000006112,10090.ENSMUSP00000025254,10090.ENSMUSP00000030741,10090.ENSMUSP00000032492,10090.ENSMUSP00000032825,10090.ENSMUSP00000034592,10090.ENSMUSP00000039707,10090.ENSMUSP00000039888,10090.ENSMUSP00000052014,10090.ENSMUSP00000054774,10090.ENSMUSP00000056040,10090.ENSMUSP00000061935,10090.ENSMUSP00000062171,10090.ENSMUSP00000064048,10090.ENSMUSP00000069114…	Ncan,Ephb3,Lims2,Ptpru,Cd9,Mfge8,Dscaml1,Micall2,Pcdha1,Tenm2,Pcdh20,Dscam,Epcam,Flrt2,Ptprs,Ackr3,Dchs1,Rac1,Sdk1,Pxn,Selplg,Ssx2ip,Col4a3,Nrxn2,Tenm1,Lphn3,Cdh8,Camsap3
GO:0010976	positive regulation of neuron projection development	17	280	0.4	0.0419	1.37779	10090.ENSMUSP00000001347,10090.ENSMUSP00000002765,10090.ENSMUSP00000021950,10090.ENSMUSP00000024805,10090.ENSMUSP00000045121,10090.ENSMUSP00000056040,10090.ENSMUSP00000062539,10090.ENSMUSP00000073720,10090.ENSMUSP00000073847,10090.ENSMUSP00000078746,10090.ENSMUSP00000079380,10090.ENSMUSP00000081041,10090.ENSMUSP00000093270,10090.ENSMUSP00000095936,10090.ENSMUSP00000097547,10090.ENSMUSP00000107439…	Rnd2,Prkd1,Dbn1,Cpne5,Lppr5,Dscam,Pcp4,Bmp4,Cpne6,Stk24,Rac1,Fgfr1,Akap5,Cpeb1,Fyn,Neurl1a,Nme1
GO:0010646	regulation of cell communication	90	2676	0.14	0.0436	1.36051	10090.ENSMUSP00000000707,10090.ENSMUSP00000001569,10090.ENSMUSP00000002765,10090.ENSMUSP00000004560,10090.ENSMUSP00000004673,10090.ENSMUSP00000007799,10090.ENSMUSP00000014917,10090.ENSMUSP00000019999,10090.ENSMUSP00000020301,10090.ENSMUSP00000020640,10090.ENSMUSP00000021204,10090.ENSMUSP00000021773,10090.ENSMUSP00000021843,10090.ENSMUSP00000021950,10090.ENSMUSP00000021970,10090.ENSMUSP00000022616…	Loxl3,Flot1,Prkd1,Bid,Ndrg2,Cav1,Dll1,Arfgef3,Vsir,Gnb2l1,Nxn,Gpld1,Nqo2,Dbn1,Cxcl14,Clu,Grina,Mapk8ip2,Asic1,Lims2,Smyd2,Prkcq,Mdk,Cyp2j6,Mad2l2,Nsg1,Dfna5,Fgf13,Bgn,Pik3r2,Fam65a,Nenf,S100a13,Kiaa0922,S1pr2,Gli2,Sall3,Nrep,Pfkm,Flrt2,Vav2,Adcyap1r1,Ptprs,Eya2,Sh3bp4,Ackr3,Stx3,Dtnbp1,Bmp4,Asph,Stk24,Rac1,Syngap1,Fgfr1,Pxn,Grb10,Arhgef40,Arhgap42,Ccnd1,Akap5,Cpeb1,Fyn,Stmn3,Fgf11,Fndc5,Ssx2ip,N2…
GO:0065008	regulation of biological quality	97	2939	0.13	0.0472	1.32606	10090.ENSMUSP00000001304,10090.ENSMUSP00000001347,10090.ENSMUSP00000001569,10090.ENSMUSP00000001963,10090.ENSMUSP00000002412,10090.ENSMUSP00000002765,10090.ENSMUSP00000002848,10090.ENSMUSP00000004554,10090.ENSMUSP00000004560,10090.ENSMUSP00000006112,10090.ENSMUSP00000007799,10090.ENSMUSP00000014917,10090.ENSMUSP00000015877,10090.ENSMUSP00000020158,10090.ENSMUSP00000020640,10090.ENSMUSP00000021045…	Ckb,Rnd2,Flot1,Ace,Ncan,Prkd1,Grin2d,Rps5,Bid,Ephb3,Cav1,Dll1,Capza2,Myb,Gnb2l1,Asic2,Nxn,Gpld1,Dbn1,Clu,Nefm,Grina,Mapk8ip2,Pros1,Asic1,Ehd3,Pycr1,Shmt2,Vim,Prkcq,Fmn2,Nsg1,Cd9,Fgf13,Slc25a4,Mt2,Pik3r2,Jhy,Lmo1,Fmnl1,Nenf,Dagla,Kcnh5,Kcnh2,S100a13,Kcnh8,S1pr2,Epb4.1l2,Dscam,Pfkm,Mettl21c,Flrt2,Vav2,Adcyap1r1,Ptprs,Eya2,Iqgap2,Stx3,Syt5,Dtnbp1,Bmp4,Map2,Asph,Kcnk2,Rac1,Syngap1,Fgfr1,Atp1a2,Pxn,Ar…
GO:0007267	cell-cell signaling	29	625	0.28	0.0499	1.3019	10090.ENSMUSP00000002848,10090.ENSMUSP00000004673,10090.ENSMUSP00000007799,10090.ENSMUSP00000014917,10090.ENSMUSP00000021204,10090.ENSMUSP00000021970,10090.ENSMUSP00000023291,10090.ENSMUSP00000030741,10090.ENSMUSP00000031009,10090.ENSMUSP00000039888,10090.ENSMUSP00000046358,10090.ENSMUSP00000049808,10090.ENSMUSP00000054837,10090.ENSMUSP00000062638,10090.ENSMUSP00000069529,10090.ENSMUSP00000070322…	Grin2d,Ndrg2,Cav1,Dll1,Nxn,Cxcl14,Mapk8ip2,Ptpru,Nsg1,Pcdha1,Dagla,Kiaa0922,Gli2,Gabra3,Stx3,Syt5,Bmp4,Rac1,Fgfr1,Ccnd1,Slc5a7,Prkcg,Cacna1d,Cacna1c,Nrxn2,Syn1,Myo5a,Cdh8,Dlgap2
GO:0044087	regulation of cellular component biogenesis	34	777	0.26	0.0499	1.3019	10090.ENSMUSP00000001569,10090.ENSMUSP00000001963,10090.ENSMUSP00000004560,10090.ENSMUSP00000006112,10090.ENSMUSP00000007799,10090.ENSMUSP00000015877,10090.ENSMUSP00000020640,10090.ENSMUSP00000021045,10090.ENSMUSP00000021950,10090.ENSMUSP00000022595,10090.ENSMUSP00000022616,10090.ENSMUSP00000028118,10090.ENSMUSP00000030039,10090.ENSMUSP00000034296,10090.ENSMUSP00000041920,10090.ENSMUSP00000045121…	Flot1,Ace,Bid,Ephb3,Cav1,Capza2,Gnb2l1,Asic2,Dbn1,Rgcc,Clu,Prkcq,Fmn2,Pik3r2,Camsap2,Lppr5,Trim37,Tenm2,Flrt2,Iqgap2,Rac1,Pxn,Gda,Stam,Myo10,Dmtn,Neurl1a,Lrtm2,Tenm1,Hdac6,Lphn3,Bai3,Camsap3,Asap1

## Sheet: OLG_downregulated
#term ID	term description	observed gene count	background gene count	strength	false discovery rate	-LOG10(FDR)	matching proteins in your network (IDs)	matching proteins in your network (labels)
GO:0006629	lipid metabolic process	126	815	0.34	1.06e-10	9.97469	10090.ENSMUSP00000001507,10090.ENSMUSP00000004137,10090.ENSMUSP00000005406,10090.ENSMUSP00000006557,10090.ENSMUSP00000006692,10090.ENSMUSP00000006912,10090.ENSMUSP00000007005,10090.ENSMUSP00000015858,10090.ENSMUSP00000018311,10090.ENSMUSP00000021424,10090.ENSMUSP00000021668,10090.ENSMUSP00000021920,10090.ENSMUSP00000022176,10090.ENSMUSP00000022207,10090.ENSMUSP00000022292,10090.ENSMUSP00000022977…	Cyp51,Gstm7,App,Elovl1,Mvd,Pip4k2a,Acat2,Cers2,Stard3,Sptlc2,Npc2,Sptlc1,Hmgcr,Elovl7,Samd8,Sqle,Ehhadh,Gpd1,Agpat4,Stard4,Npc1,St8sia3,Atp8b1,Fech,Tm7sf2,Pcyt2,Scd2,Alox5,Pigq,Cyp27a1,Acss2,Pmvk,Hadh,Pi4k2b,Cds1,Aacs,Cyp3a13,Adipor2,Etnk1,Ebp,Nsdhl,Piga,Plp1,Ddhd2,Asah1,Msmo1,Acsl1,Mtmr2,St3gal4,Ldlr,Plekha1,Gdpd5,Ldlrap1,Scd1,Mvk,Plcl1,Dhcr24,Faah,Agps,Fa2h,Pcyt1b,Spns2,Slc16a1,Acsl3,Pigk,Mboat…
GO:0008610	lipid biosynthetic process	71	345	0.46	5.03e-10	9.29843	10090.ENSMUSP00000001507,10090.ENSMUSP00000006557,10090.ENSMUSP00000006692,10090.ENSMUSP00000015858,10090.ENSMUSP00000018311,10090.ENSMUSP00000021424,10090.ENSMUSP00000021920,10090.ENSMUSP00000022176,10090.ENSMUSP00000022207,10090.ENSMUSP00000022292,10090.ENSMUSP00000022977,10090.ENSMUSP00000024594,10090.ENSMUSP00000025477,10090.ENSMUSP00000025713,10090.ENSMUSP00000026129,10090.ENSMUSP00000026221…	Cyp51,Elovl1,Mvd,Cers2,Stard3,Sptlc2,Sptlc1,Hmgcr,Elovl7,Samd8,Sqle,Agpat4,St8sia3,Tm7sf2,Pcyt2,Scd2,Pigq,Cyp27a1,Acss2,Pmvk,Cds1,Etnk1,Ebp,Nsdhl,Piga,Plp1,Msmo1,Acsl1,St3gal4,Scd1,Mvk,Dhcr24,Agps,Fa2h,Pcyt1b,Acsl3,Pigk,Mboat1,Lss,Degs1,Ugt8a,Pigm,Fasn,Fdft1,Sc5d,Fads6,Ptplb,Insig1,Far1,Cept1,Elovl6,Sphk2,Dhcr7,Acot7,Fdps,Aldh1a1,Srd5a1,Pgap1,Cds2,Acaca,Acly,Fitm2,Lpgat1,Pigc,Mgll,Inpp4a,Etnk2,Ep…
GO:0007399	nervous system development	218	1888	0.21	1.12e-08	7.95078	10090.ENSMUSP00000000127,10090.ENSMUSP00000000641,10090.ENSMUSP00000000724,10090.ENSMUSP00000002603,10090.ENSMUSP00000003369,10090.ENSMUSP00000003501,10090.ENSMUSP00000004036,10090.ENSMUSP00000004968,10090.ENSMUSP00000005014,10090.ENSMUSP00000005066,10090.ENSMUSP00000005164,10090.ENSMUSP00000005256,10090.ENSMUSP00000005406,10090.ENSMUSP00000006828,10090.ENSMUSP00000008878,10090.ENSMUSP00000014743…	Wnt3,Sema4f,Kat2b,Scrib,Plag1,Elavl3,Efnb3,Plod3,Hapln2,Map2k1,Prkacb,Ndrg1,App,Aplp1,Gprc5b,Csf1,Gdi1,Cers2,Celsr1,Nrbp2,Sema6a,Rab21,Dnmt3a,Kif3c,Aspa,Sema4d,Ptch1,Ctsl,Rb1,Slc38a2,Arc,Prkdc,Nde1,Slc11a2,Bin1,Atp8b1,Als2,Epha4,Efhd1,Slc45a3,Kif5c,Gsn,Tyro3,Atrn,Bmp2,Mal,Tspan2,Neurog2,Slc2a1,Stmn1,Cdk5,Prkcz,Scarb2,Rasal1,Cntn3,Sh3gl3,Pak1,Bag3,Atp6ap2,Plp1,Sall1,Mtmr2,Jam3,Pvrl1,Fez1,Ldlr,Tmem…
GO:0022008	neurogenesis	168	1420	0.22	7.71e-07	6.11295	10090.ENSMUSP00000000127,10090.ENSMUSP00000000641,10090.ENSMUSP00000000724,10090.ENSMUSP00000002603,10090.ENSMUSP00000003369,10090.ENSMUSP00000004036,10090.ENSMUSP00000005066,10090.ENSMUSP00000005256,10090.ENSMUSP00000005406,10090.ENSMUSP00000008878,10090.ENSMUSP00000014743,10090.ENSMUSP00000015435,10090.ENSMUSP00000015858,10090.ENSMUSP00000016172,10090.ENSMUSP00000019516,10090.ENSMUSP00000019791…	Wnt3,Sema4f,Kat2b,Scrib,Plag1,Efnb3,Map2k1,Ndrg1,App,Gprc5b,Csf1,Gdi1,Cers2,Celsr1,Nrbp2,Sema6a,Rab21,Dnmt3a,Kif3c,Aspa,Sema4d,Ptch1,Rb1,Arc,Nde1,Slc11a2,Bin1,Atp8b1,Als2,Epha4,Efhd1,Slc45a3,Kif5c,Gsn,Bmp2,Tspan2,Neurog2,Stmn1,Cdk5,Prkcz,Scarb2,Rasal1,Sh3gl3,Pak1,Plp1,Sall1,Mtmr2,Jam3,Pvrl1,Fez1,Ldlr,Tmem30a,Map4,Trf,Ntng2,Gdpd5,Myo6,Lzts3,Git1,Mmd2,Shtn1,Micall1,Sema7a,Ssh2,Fa2h,Dicer1,Hdac11,Tt…
GO:0016125	sterol metabolic process	30	97	0.64	8.17e-07	6.08778	10090.ENSMUSP00000001507,10090.ENSMUSP00000005406,10090.ENSMUSP00000006692,10090.ENSMUSP00000021668,10090.ENSMUSP00000022176,10090.ENSMUSP00000022977,10090.ENSMUSP00000025279,10090.ENSMUSP00000025484,10090.ENSMUSP00000025713,10090.ENSMUSP00000027356,10090.ENSMUSP00000029564,10090.ENSMUSP00000033509,10090.ENSMUSP00000033715,10090.ENSMUSP00000034015,10090.ENSMUSP00000034713,10090.ENSMUSP00000036749…	Cyp51,App,Mvd,Npc2,Hmgcr,Sqle,Npc1,Fech,Tm7sf2,Cyp27a1,Pmvk,Ebp,Nsdhl,Msmo1,Ldlr,Ldlrap1,Mvk,Dhcr24,Lss,Lipa,Fdft1,Sc5d,Sorl1,Insig1,Aplp2,Dhcr7,Fdps,Vldlr,Idi1,Hmgcs1
GO:0044255	cellular lipid metabolic process	93	634	0.31	8.17e-07	6.08778	10090.ENSMUSP00000004137,10090.ENSMUSP00000006557,10090.ENSMUSP00000006692,10090.ENSMUSP00000006912,10090.ENSMUSP00000007005,10090.ENSMUSP00000015858,10090.ENSMUSP00000021424,10090.ENSMUSP00000021920,10090.ENSMUSP00000022176,10090.ENSMUSP00000022207,10090.ENSMUSP00000022292,10090.ENSMUSP00000023559,10090.ENSMUSP00000023760,10090.ENSMUSP00000024594,10090.ENSMUSP00000025236,10090.ENSMUSP00000025477…	Gstm7,Elovl1,Mvd,Pip4k2a,Acat2,Cers2,Sptlc2,Sptlc1,Hmgcr,Elovl7,Samd8,Ehhadh,Gpd1,Agpat4,Stard4,St8sia3,Pcyt2,Scd2,Alox5,Pigq,Acss2,Pmvk,Hadh,Pi4k2b,Cds1,Aacs,Cyp3a13,Adipor2,Etnk1,Piga,Plp1,Ddhd2,Acsl1,Mtmr2,St3gal4,Scd1,Mvk,Faah,Agps,Fa2h,Pcyt1b,Spns2,Acsl3,Pigk,Mboat1,Inpp5f,Gde1,Inpp5j,Degs1,Ugt8a,Mapk3,Pigm,Fasn,Lipa,Napepld,Fdft1,Fads6,Ptplb,Insig1,Far1,Cept1,St6galnac3,Ppap2c,Pla2g4a,Elovl…
GO:0048731	system development	337	3446	0.14	8.17e-07	6.08778	10090.ENSMUSP00000000127,10090.ENSMUSP00000000641,10090.ENSMUSP00000000724,10090.ENSMUSP00000001592,10090.ENSMUSP00000002081,10090.ENSMUSP00000002418,10090.ENSMUSP00000002603,10090.ENSMUSP00000003369,10090.ENSMUSP00000003501,10090.ENSMUSP00000004036,10090.ENSMUSP00000004968,10090.ENSMUSP00000005014,10090.ENSMUSP00000005066,10090.ENSMUSP00000005164,10090.ENSMUSP00000005256,10090.ENSMUSP00000005406…	Wnt3,Sema4f,Kat2b,Jup,Srpk3,Borcs8,Scrib,Plag1,Elavl3,Efnb3,Plod3,Hapln2,Map2k1,Prkacb,Ndrg1,App,Aplp1,Pip4k2a,Bcl2l1,Gprc5b,Adam19,Csf1,Gdi1,Cers2,Qdpr,Celsr1,Nkap,Rab11fip4,Nrbp2,Sema6a,Arid5b,Rab21,Dnmt3a,Kif3c,Aspa,Sema4d,Ptch1,Ctsl,Plau,Lect1,Bmp1,Rb1,Bcl2l2,Slc38a2,Arc,Prkdc,Nde1,Slc11a2,Igf2r,Bin1,Atp8b1,Fech,Smad7,Als2,Epha4,Efhd1,Slc45a3,Kif5c,Gsn,Tyro3,Atrn,Bmp2,Mal,Angpt4,Car2,Fam83d,T…
GO:0016126	sterol biosynthetic process	19	36	0.87	8.39e-07	6.07624	10090.ENSMUSP00000001507,10090.ENSMUSP00000006692,10090.ENSMUSP00000022176,10090.ENSMUSP00000022977,10090.ENSMUSP00000025713,10090.ENSMUSP00000029564,10090.ENSMUSP00000033509,10090.ENSMUSP00000033715,10090.ENSMUSP00000034015,10090.ENSMUSP00000036971,10090.ENSMUSP00000038063,10090.ENSMUSP00000046856,10090.ENSMUSP00000055313,10090.ENSMUSP00000057354,10090.ENSMUSP00000061877,10090.ENSMUSP00000073541…	Cyp51,Mvd,Hmgcr,Sqle,Tm7sf2,Pmvk,Ebp,Nsdhl,Msmo1,Mvk,Dhcr24,Lss,Fdft1,Sc5d,Insig1,Dhcr7,Fdps,Idi1,Hmgcs1
GO:0008366	axon ensheathment	29	92	0.65	8.39e-07	6.07624	10090.ENSMUSP00000005256,10090.ENSMUSP00000021119,10090.ENSMUSP00000028781,10090.ENSMUSP00000028854,10090.ENSMUSP00000029451,10090.ENSMUSP00000033800,10090.ENSMUSP00000034396,10090.ENSMUSP00000034472,10090.ENSMUSP00000042181,10090.ENSMUSP00000043597,10090.ENSMUSP00000043676,10090.ENSMUSP00000046185,10090.ENSMUSP00000050852,10090.ENSMUSP00000052581,10090.ENSMUSP00000054356,10090.ENSMUSP00000055000…	Ndrg1,Aspa,Atrn,Mal,Tspan2,Plp1,Mtmr2,Jam3,Cldn11,Fa2h,Dicer1,Mbp,Ugt8a,Lpar1,Kcnj10,Adam22,Sh3tc2,Nab1,Mpp5,Arhgef10,Cntn2,Nfasc,Mpdz,Tenm4,Epb4.1l3,Pou3f1,Slc8a3,Myrf,Mag
GO:0008203	cholesterol metabolic process	28	88	0.65	9.94e-07	6.00261	10090.ENSMUSP00000001507,10090.ENSMUSP00000005406,10090.ENSMUSP00000006692,10090.ENSMUSP00000021668,10090.ENSMUSP00000022176,10090.ENSMUSP00000022977,10090.ENSMUSP00000025279,10090.ENSMUSP00000025484,10090.ENSMUSP00000025713,10090.ENSMUSP00000027356,10090.ENSMUSP00000029564,10090.ENSMUSP00000033509,10090.ENSMUSP00000033715,10090.ENSMUSP00000034713,10090.ENSMUSP00000036749,10090.ENSMUSP00000036971…	Cyp51,App,Mvd,Npc2,Hmgcr,Sqle,Npc1,Fech,Tm7sf2,Cyp27a1,Pmvk,Ebp,Nsdhl,Ldlr,Ldlrap1,Mvk,Dhcr24,Lss,Fdft1,Sc5d,Sorl1,Insig1,Aplp2,Dhcr7,Fdps,Vldlr,Idi1,Hmgcs1
GO:0006066	alcohol metabolic process	46	220	0.47	1.11e-06	5.95468	10090.ENSMUSP00000001507,10090.ENSMUSP00000005406,10090.ENSMUSP00000006692,10090.ENSMUSP00000015950,10090.ENSMUSP00000020217,10090.ENSMUSP00000021424,10090.ENSMUSP00000021668,10090.ENSMUSP00000021817,10090.ENSMUSP00000021920,10090.ENSMUSP00000022176,10090.ENSMUSP00000022977,10090.ENSMUSP00000023760,10090.ENSMUSP00000025279,10090.ENSMUSP00000025484,10090.ENSMUSP00000025713,10090.ENSMUSP00000027356…	Cyp51,App,Mvd,Qdpr,Nudt4,Sptlc2,Npc2,Ippk,Sptlc1,Hmgcr,Sqle,Gpd1,Npc1,Fech,Tm7sf2,Cyp27a1,Pmvk,Ebp,Nsdhl,Mtmr2,Ldlr,Ldlrap1,Mvk,Dhcr24,Itpk1,Gde1,Lss,Napepld,Fdft1,Sc5d,Sorl1,Insig1,Aplp2,Sphk2,Dhcr7,Synj2,Fdps,Aldh1a1,Asah2,Gpd2,Ppip5k2,Slc5a3,Gk5,Vldlr,Idi1,Hmgcs1
GO:0006695	cholesterol biosynthetic process	17	29	0.91	1.24e-06	5.90658	10090.ENSMUSP00000001507,10090.ENSMUSP00000006692,10090.ENSMUSP00000022176,10090.ENSMUSP00000025713,10090.ENSMUSP00000029564,10090.ENSMUSP00000033509,10090.ENSMUSP00000033715,10090.ENSMUSP00000036971,10090.ENSMUSP00000038063,10090.ENSMUSP00000046856,10090.ENSMUSP00000055313,10090.ENSMUSP00000057354,10090.ENSMUSP00000061877,10090.ENSMUSP00000073541,10090.ENSMUSP00000080531,10090.ENSMUSP00000132780…	Cyp51,Mvd,Hmgcr,Tm7sf2,Pmvk,Ebp,Nsdhl,Mvk,Dhcr24,Lss,Fdft1,Sc5d,Insig1,Dhcr7,Fdps,Idi1,Hmgcs1
GO:0042552	myelination	28	90	0.64	1.24e-06	5.90658	10090.ENSMUSP00000005256,10090.ENSMUSP00000021119,10090.ENSMUSP00000028781,10090.ENSMUSP00000028854,10090.ENSMUSP00000029451,10090.ENSMUSP00000033800,10090.ENSMUSP00000034396,10090.ENSMUSP00000034472,10090.ENSMUSP00000043597,10090.ENSMUSP00000043676,10090.ENSMUSP00000046185,10090.ENSMUSP00000050852,10090.ENSMUSP00000052581,10090.ENSMUSP00000054356,10090.ENSMUSP00000055000,10090.ENSMUSP00000055094…	Ndrg1,Aspa,Atrn,Mal,Tspan2,Plp1,Mtmr2,Jam3,Fa2h,Dicer1,Mbp,Ugt8a,Lpar1,Kcnj10,Adam22,Sh3tc2,Nab1,Mpp5,Arhgef10,Cntn2,Nfasc,Mpdz,Tenm4,Epb4.1l3,Pou3f1,Slc8a3,Myrf,Mag
GO:0016192	vesicle-mediated transport	118	926	0.25	2.66e-06	5.57512	10090.ENSMUSP00000000384,10090.ENSMUSP00000002063,10090.ENSMUSP00000002603,10090.ENSMUSP00000003345,10090.ENSMUSP00000004428,10090.ENSMUSP00000004683,10090.ENSMUSP00000005406,10090.ENSMUSP00000006828,10090.ENSMUSP00000007803,10090.ENSMUSP00000010536,10090.ENSMUSP00000018311,10090.ENSMUSP00000018315,10090.ENSMUSP00000019268,10090.ENSMUSP00000019516,10090.ENSMUSP00000021028,10090.ENSMUSP00000022217…	Trappc10,Ap4e1,Scrib,Amph,Clcn5,Mcoln1,App,Aplp1,Bcl2l1,Gosr1,Stard3,Vmp1,Scrn1,Nrbp2,Itgb3,Zfyve16,Arc,Tbc1d5,Bin1,Npc1,Map4k2,Als2,Stx6,Gsn,Tyro3,Leprot,Cdk5,Cdc7,Uso1,Scarb2,Stx2,Sh3gl3,Pak1,Gp2,Lamp1,Ddhd2,Ldlr,Myo1e,Rab6b,Myo6,Ldlrap1,Myo1d,Stard3nl,Fam21,Bicd2,Ap5z1,Cbl,Micall1,Rab3gap1,Atp8a1,Usp6nl,Sft2d2,Dnajc6,Inpp5f,Lgi3,Coro7,Rims2,Mapk8ip1,Picalm,Mapk3,Itsn2,Pdia6,Ston2,Tmed2,Gpr107,…
GO:0046165	alcohol biosynthetic process	24	74	0.66	6.49e-06	5.18776	10090.ENSMUSP00000001507,10090.ENSMUSP00000006692,10090.ENSMUSP00000015950,10090.ENSMUSP00000021424,10090.ENSMUSP00000021817,10090.ENSMUSP00000021920,10090.ENSMUSP00000022176,10090.ENSMUSP00000025713,10090.ENSMUSP00000027356,10090.ENSMUSP00000029564,10090.ENSMUSP00000033509,10090.ENSMUSP00000033715,10090.ENSMUSP00000036971,10090.ENSMUSP00000038063,10090.ENSMUSP00000046856,10090.ENSMUSP00000055313…	Cyp51,Mvd,Qdpr,Sptlc2,Ippk,Sptlc1,Hmgcr,Tm7sf2,Cyp27a1,Pmvk,Ebp,Nsdhl,Mvk,Dhcr24,Lss,Fdft1,Sc5d,Insig1,Sphk2,Dhcr7,Fdps,Ppip5k2,Idi1,Hmgcs1
GO:0006644	phospholipid metabolic process	46	240	0.43	7.3e-06	5.13668	10090.ENSMUSP00000006692,10090.ENSMUSP00000006912,10090.ENSMUSP00000021424,10090.ENSMUSP00000021920,10090.ENSMUSP00000022292,10090.ENSMUSP00000024594,10090.ENSMUSP00000026129,10090.ENSMUSP00000026823,10090.ENSMUSP00000029564,10090.ENSMUSP00000031081,10090.ENSMUSP00000031273,10090.ENSMUSP00000032413,10090.ENSMUSP00000033754,10090.ENSMUSP00000034396,10090.ENSMUSP00000036971,10090.ENSMUSP00000044280…	Mvd,Pip4k2a,Sptlc2,Sptlc1,Samd8,Agpat4,Pcyt2,Pigq,Pmvk,Pi4k2b,Cds1,Etnk1,Piga,Mtmr2,Mvk,Pcyt1b,Pigk,Mboat1,Inpp5f,Gde1,Inpp5j,Pigm,Napepld,Fdft1,Far1,Cept1,Ppap2c,Pla2g4a,Prdx6,Sphk2,Synj2,Fdps,Pgap1,Mtm1,Cds2,Plch2,Fitm2,Lpgat1,Pigc,Inpp4a,Etnk2,Ept1,Tmem55b,Enpp2,Idi1,Pign
GO:0007010	cytoskeleton organization	108	842	0.26	7.3e-06	5.13668	10090.ENSMUSP00000001479,10090.ENSMUSP00000002099,10090.ENSMUSP00000002889,10090.ENSMUSP00000014990,10090.ENSMUSP00000018851,10090.ENSMUSP00000022057,10090.ENSMUSP00000022327,10090.ENSMUSP00000022682,10090.ENSMUSP00000023268,10090.ENSMUSP00000023359,10090.ENSMUSP00000024636,10090.ENSMUSP00000025893,10090.ENSMUSP00000027677,10090.ENSMUSP00000028239,10090.ENSMUSP00000029571,10090.ENSMUSP00000030033…	Kpnb1,Ift46,Flii,Tppp3,Dync1h1,Tppp,Ldb3,Sorbs3,Arc,Nde1,Fgfr1op,Arl2,Csrp1,Gsn,Sass6,Murc,Stmn1,Cdk5,Prkcz,Kctd13,Pak1,Cryab,Map4,Trf,Spef2,Cep72,Trim36,Foxj1,Rhou,Atp2c1,Bicd2,Thsd7a,Tesk2,Shtn1,Coro2b,Ssh2,AK129341,Dicer1,Slc16a1,Dync1li2,Pak7,Coro7,Ttll5,Ctnna1,Slk,Ugt8a,Daam2,Ccdc187,Map7d1,Rap2a,Cdc42ep2,Lmod1,Dlg1,Map6,Rtkn,Cenpj,Actn4,Tubb3,Mink1,Lrrc16a,Stmn4,Abl1,Plec,Plk3,Mical3,Apc,My…
GO:0008202	steroid metabolic process	37	168	0.49	7.51e-06	5.12436	10090.ENSMUSP00000001507,10090.ENSMUSP00000005406,10090.ENSMUSP00000006692,10090.ENSMUSP00000018311,10090.ENSMUSP00000021668,10090.ENSMUSP00000022176,10090.ENSMUSP00000022977,10090.ENSMUSP00000025236,10090.ENSMUSP00000025279,10090.ENSMUSP00000025482,10090.ENSMUSP00000025484,10090.ENSMUSP00000025713,10090.ENSMUSP00000027356,10090.ENSMUSP00000029564,10090.ENSMUSP00000031741,10090.ENSMUSP00000033509…	Cyp51,App,Mvd,Stard3,Npc2,Hmgcr,Sqle,Stard4,Npc1,Atp8b1,Fech,Tm7sf2,Cyp27a1,Pmvk,Cyp3a13,Ebp,Nsdhl,Msmo1,Ldlr,Plekha1,Ldlrap1,Scd1,Mvk,Dhcr24,Lss,Lipa,Fdft1,Sc5d,Sorl1,Insig1,Aplp2,Dhcr7,Fdps,Srd5a1,Vldlr,Idi1,Hmgcs1
GO:0048699	generation of neurons	151	1318	0.21	8.46e-06	5.07263	10090.ENSMUSP00000000127,10090.ENSMUSP00000000641,10090.ENSMUSP00000000724,10090.ENSMUSP00000002603,10090.ENSMUSP00000003369,10090.ENSMUSP00000004036,10090.ENSMUSP00000005066,10090.ENSMUSP00000005406,10090.ENSMUSP00000008878,10090.ENSMUSP00000014743,10090.ENSMUSP00000015435,10090.ENSMUSP00000015858,10090.ENSMUSP00000016172,10090.ENSMUSP00000019516,10090.ENSMUSP00000019791,10090.ENSMUSP00000020343…	Wnt3,Sema4f,Kat2b,Scrib,Plag1,Efnb3,Map2k1,App,Gprc5b,Csf1,Gdi1,Cers2,Celsr1,Nrbp2,Sema6a,Rab21,Dnmt3a,Kif3c,Aspa,Sema4d,Ptch1,Rb1,Arc,Nde1,Slc11a2,Bin1,Atp8b1,Als2,Epha4,Efhd1,Slc45a3,Kif5c,Bmp2,Tspan2,Neurog2,Stmn1,Cdk5,Prkcz,Scarb2,Rasal1,Sh3gl3,Pak1,Plp1,Sall1,Mtmr2,Jam3,Pvrl1,Fez1,Ldlr,Tmem30a,Map4,Trf,Ntng2,Gdpd5,Myo6,Lzts3,Git1,Mmd2,Shtn1,Micall1,Sema7a,Ssh2,Dicer1,Ttbk1,Inpp5f,Inpp5j,Rims…
GO:0007275	multicellular organism development	362	3901	0.11	1e-05	5	10090.ENSMUSP00000000127,10090.ENSMUSP00000000153,10090.ENSMUSP00000000641,10090.ENSMUSP00000000724,10090.ENSMUSP00000001592,10090.ENSMUSP00000002081,10090.ENSMUSP00000002418,10090.ENSMUSP00000002603,10090.ENSMUSP00000002889,10090.ENSMUSP00000003369,10090.ENSMUSP00000003501,10090.ENSMUSP00000003612,10090.ENSMUSP00000004036,10090.ENSMUSP00000004968,10090.ENSMUSP00000005014,10090.ENSMUSP00000005066…	Wnt3,Gna12,Sema4f,Kat2b,Jup,Srpk3,Borcs8,Scrib,Flii,Plag1,Elavl3,Dusp3,Efnb3,Plod3,Hapln2,Map2k1,Prkacb,Ndrg1,App,Ctr9,Aplp1,Pip4k2a,Bcl2l1,Gprc5b,Adam19,Csf1,Gdi1,Cers2,Qdpr,Celsr1,Nkap,Rab11fip4,Vmp1,Nrbp2,Sema6a,Arid5b,Rab21,Dnmt3a,Kif3c,Itgb3,Aspa,Sema4d,Ptch1,Ctsl,Plau,Lect1,Bmp1,Rb1,Bcl2l2,Slc38a2,Arc,Prkdc,Nde1,Kmt2d,Slc11a2,Igf2r,Bin1,Atp8b1,Fech,Smad7,Als2,Epha4,Efhd1,Slc45a3,Kif5c,Gsn,T…
GO:0030030	cell projection organization	113	907	0.24	1.14e-05	4.9431	10090.ENSMUSP00000000127,10090.ENSMUSP00000000590,10090.ENSMUSP00000000641,10090.ENSMUSP00000002099,10090.ENSMUSP00000002603,10090.ENSMUSP00000004036,10090.ENSMUSP00000005066,10090.ENSMUSP00000005406,10090.ENSMUSP00000019791,10090.ENSMUSP00000021028,10090.ENSMUSP00000021921,10090.ENSMUSP00000022566,10090.ENSMUSP00000022701,10090.ENSMUSP00000023270,10090.ENSMUSP00000023774,10090.ENSMUSP00000024636…	Wnt3,Rdx,Sema4f,Ift46,Scrib,Efnb3,Map2k1,App,Sema6a,Itgb3,Ptch1,Spata13,Rb1,Cep97,Slc11a2,Fgfr1op,Als2,Epha4,Efhd1,Kif5c,Gsn,Tspan2,Neurog2,Stmn1,Cdk5,Prkcz,Stx2,Pak1,Plp1,Mtmr2,Jam3,Pvrl1,Fez1,Map4,Plekha1,Ntng2,Spef2,Gdpd5,Myo6,Git1,Foxj1,Shtn1,Micall1,Sema7a,Rpgrip1l,AK129341,Dicer1,Ptpdc1,Ick,Ttll5,Ctnna1,Ugt8a,D1Ertd622e,Picalm,Lpar1,Rap2a,Atxn2,Tapt1,Fam161a,Phgdh,Map6,Cenpj,Tubb3,Prdx6,Min…
GO:0120036	plasma membrane bounded cell projection organization	109	871	0.24	1.58e-05	4.80134	10090.ENSMUSP00000000127,10090.ENSMUSP00000000590,10090.ENSMUSP00000000641,10090.ENSMUSP00000002099,10090.ENSMUSP00000002603,10090.ENSMUSP00000004036,10090.ENSMUSP00000005066,10090.ENSMUSP00000005406,10090.ENSMUSP00000019791,10090.ENSMUSP00000021921,10090.ENSMUSP00000022566,10090.ENSMUSP00000022701,10090.ENSMUSP00000023774,10090.ENSMUSP00000027178,10090.ENSMUSP00000027451,10090.ENSMUSP00000027472…	Wnt3,Rdx,Sema4f,Ift46,Scrib,Efnb3,Map2k1,App,Sema6a,Ptch1,Spata13,Rb1,Slc11a2,Als2,Epha4,Efhd1,Kif5c,Gsn,Tspan2,Neurog2,Stmn1,Cdk5,Prkcz,Stx2,Pak1,Plp1,Mtmr2,Jam3,Pvrl1,Fez1,Map4,Plekha1,Ntng2,Spef2,Gdpd5,Myo6,Git1,Foxj1,Shtn1,Micall1,Sema7a,Rpgrip1l,AK129341,Dicer1,Ptpdc1,Ick,Ttll5,Ctnna1,Ugt8a,D1Ertd622e,Picalm,Lpar1,Rap2a,Atxn2,Fam161a,Phgdh,Map6,Cenpj,Tubb3,Prdx6,Mink1,Lrrc16a,Cxcl12,Stmn4,Cd…
GO:0044283	small molecule biosynthetic process	64	421	0.33	2.77e-05	4.55752	10090.ENSMUSP00000001507,10090.ENSMUSP00000004968,10090.ENSMUSP00000006557,10090.ENSMUSP00000006692,10090.ENSMUSP00000015950,10090.ENSMUSP00000018311,10090.ENSMUSP00000019199,10090.ENSMUSP00000020217,10090.ENSMUSP00000020957,10090.ENSMUSP00000021424,10090.ENSMUSP00000021817,10090.ENSMUSP00000021920,10090.ENSMUSP00000022176,10090.ENSMUSP00000022207,10090.ENSMUSP00000023760,10090.ENSMUSP00000025713…	Cyp51,Plod3,Elovl1,Mvd,Qdpr,Stard3,Plod1,Nudt4,Adi1,Sptlc2,Ippk,Sptlc1,Hmgcr,Elovl7,Gpd1,Tm7sf2,Scd2,Pde8a,Alox5,Cyp27a1,Acss2,Pmvk,Ctps,Mmab,Bcat1,Ebp,Nsdhl,Plp1,Scd1,Mvk,Dhcr24,Fa2h,Acsl3,Lss,Bpgm,Degs1,Fasn,Fdft1,Sc5d,Fads6,Ptplb,Insig1,Phgdh,Pla2g4a,Elovl6,Sphk2,Nudt7,Dhcr7,Acot7,Fdps,Glul,Aldh1a1,Cnp,Acaca,Gamt,Acly,Gpd2,Ppip5k2,Mgll,Pfkp,Enoph1,Carns1,Idi1,Hmgcs1
GO:0048856	anatomical structure development	378	4157	0.11	3.07e-05	4.51286	10090.ENSMUSP00000000127,10090.ENSMUSP00000000153,10090.ENSMUSP00000000590,10090.ENSMUSP00000000641,10090.ENSMUSP00000000724,10090.ENSMUSP00000001592,10090.ENSMUSP00000002081,10090.ENSMUSP00000002418,10090.ENSMUSP00000002603,10090.ENSMUSP00000002889,10090.ENSMUSP00000003369,10090.ENSMUSP00000003501,10090.ENSMUSP00000003612,10090.ENSMUSP00000004036,10090.ENSMUSP00000004968,10090.ENSMUSP00000005014…	Wnt3,Gna12,Rdx,Sema4f,Kat2b,Jup,Srpk3,Borcs8,Scrib,Flii,Plag1,Elavl3,Dusp3,Efnb3,Plod3,Hapln2,Map2k1,Prkacb,Ndrg1,App,Ctr9,Aplp1,Pip4k2a,Bcl2l1,Gprc5b,Adam19,Csf1,Nol3,Gdi1,Cers2,Qdpr,Celsr1,Nkap,Rab11fip4,Vmp1,Plod1,Nrbp2,Sema6a,Arid5b,Rab21,Dnmt3a,Kif3c,Itgb3,Aspa,Sema4d,Ptch1,Ctsl,Hmgcr,Ldb3,Plau,Lect1,Bmp1,Rb1,Bcl2l2,Slc38a2,Arc,Prkdc,Nde1,Kmt2d,Slc11a2,Igf2r,Bin1,Atp8b1,Fech,Smad7,Als2,Epha4…
GO:0008654	phospholipid biosynthetic process	30	130	0.51	4.86e-05	4.31336	10090.ENSMUSP00000006692,10090.ENSMUSP00000021424,10090.ENSMUSP00000021920,10090.ENSMUSP00000022292,10090.ENSMUSP00000024594,10090.ENSMUSP00000026129,10090.ENSMUSP00000026823,10090.ENSMUSP00000029564,10090.ENSMUSP00000031273,10090.ENSMUSP00000032413,10090.ENSMUSP00000033754,10090.ENSMUSP00000036971,10090.ENSMUSP00000044280,10090.ENSMUSP00000045351,10090.ENSMUSP00000045441,10090.ENSMUSP00000052838…	Mvd,Sptlc2,Sptlc1,Samd8,Agpat4,Pcyt2,Pigq,Pmvk,Cds1,Etnk1,Piga,Mvk,Pcyt1b,Pigk,Mboat1,Pigm,Far1,Cept1,Sphk2,Fdps,Pgap1,Cds2,Fitm2,Lpgat1,Pigc,Inpp4a,Etnk2,Ept1,Idi1,Pign
GO:0032501	multicellular organismal process	430	4861	0.09	4.86e-05	4.31336	10090.ENSMUSP00000000127,10090.ENSMUSP00000000153,10090.ENSMUSP00000000641,10090.ENSMUSP00000000724,10090.ENSMUSP00000001592,10090.ENSMUSP00000002081,10090.ENSMUSP00000002418,10090.ENSMUSP00000002572,10090.ENSMUSP00000002603,10090.ENSMUSP00000002889,10090.ENSMUSP00000003345,10090.ENSMUSP00000003369,10090.ENSMUSP00000003501,10090.ENSMUSP00000003612,10090.ENSMUSP00000004036,10090.ENSMUSP00000004968…	Wnt3,Gna12,Sema4f,Kat2b,Jup,Srpk3,Borcs8,Slc9a3r2,Scrib,Flii,Amph,Plag1,Elavl3,Dusp3,Efnb3,Plod3,Hapln2,Map2k1,Prkacb,Cstb,Ndrg1,App,Ctr9,Aplp1,Pip4k2a,Bcl2l1,Gprc5b,Adam19,Csf1,Nol3,Gdi1,Ctsk,Cers2,Qdpr,Celsr1,Nkap,Mpp2,Rab11fip4,Vmp1,Nrbp2,Sema6a,Calr3,Arid5b,Rab21,Dnmt3a,Kif3c,Itgb3,Aspa,Sema4d,Ptch1,Ctsl,Hmgcr,Plau,Lect1,Bmp1,Rb1,Bcl2l2,Fam134b,Slc38a2,Arc,Prkdc,Nde1,Kmt2d,Slc11a2,Igf2r,Enpp4…
GO:0031175	neuron projection development	76	554	0.28	6.57e-05	4.18243	10090.ENSMUSP00000000127,10090.ENSMUSP00000000641,10090.ENSMUSP00000002603,10090.ENSMUSP00000004036,10090.ENSMUSP00000005066,10090.ENSMUSP00000005406,10090.ENSMUSP00000019791,10090.ENSMUSP00000021921,10090.ENSMUSP00000022701,10090.ENSMUSP00000023774,10090.ENSMUSP00000027178,10090.ENSMUSP00000027451,10090.ENSMUSP00000027472,10090.ENSMUSP00000028102,10090.ENSMUSP00000029451,10090.ENSMUSP00000029587…	Wnt3,Sema4f,Scrib,Efnb3,Map2k1,App,Sema6a,Ptch1,Rb1,Slc11a2,Als2,Epha4,Efhd1,Kif5c,Tspan2,Neurog2,Stmn1,Cdk5,Prkcz,Pak1,Plp1,Jam3,Pvrl1,Fez1,Map4,Ntng2,Gdpd5,Myo6,Git1,Shtn1,Micall1,Sema7a,Dicer1,Ctnna1,Ugt8a,Picalm,Atxn2,Phgdh,Map6,Tubb3,Mink1,Cxcl12,Stmn4,Cdh11,Btbd3,Abl1,Unc5b,Dock10,Apc,Cntn2,Ank3,Lama2,Nfasc,Srgap2,Dst,Kif5a,Cnp,Rtn4,Zswim6,Unc5c,Gas7,Ptk2,Epb4.1l3,Prickle2,Klf7,Tprn,Fgfr2,D…
GO:0032990	cell part morphogenesis	60	398	0.33	7.48e-05	4.1261	10090.ENSMUSP00000000127,10090.ENSMUSP00000000641,10090.ENSMUSP00000004036,10090.ENSMUSP00000005066,10090.ENSMUSP00000005406,10090.ENSMUSP00000007803,10090.ENSMUSP00000019791,10090.ENSMUSP00000021028,10090.ENSMUSP00000021921,10090.ENSMUSP00000023774,10090.ENSMUSP00000027178,10090.ENSMUSP00000027451,10090.ENSMUSP00000028102,10090.ENSMUSP00000029587,10090.ENSMUSP00000030636,10090.ENSMUSP00000030814…	Wnt3,Sema4f,Efnb3,Map2k1,App,Bcl2l1,Sema6a,Itgb3,Ptch1,Slc11a2,Als2,Epha4,Kif5c,Neurog2,Stmn1,Cdk5,Prkcz,Pak1,Pvrl1,Fez1,Ntng2,Shtn1,Sema7a,Dicer1,Ugt8a,Picalm,Atxn2,Map6,Tubb3,Mink1,Cxcl12,Cdh11,Btbd3,Abl1,Unc5b,Dock10,Apc,Cntn2,Mfn1,Ank3,Lama2,Nfasc,Srgap2,Dst,Kif5a,Mtm1,Cnp,Zswim6,Unc5c,Gas7,Ptk2,Epb4.1l3,Klf7,Fgfr2,Ddr1,Dact1,Apbb2,Vldlr,Myo9b,Auts2
GO:0051179	localization	346	3785	0.11	7.72e-05	4.11238	10090.ENSMUSP00000000384,10090.ENSMUSP00000000590,10090.ENSMUSP00000001479,10090.ENSMUSP00000001592,10090.ENSMUSP00000002063,10090.ENSMUSP00000002099,10090.ENSMUSP00000002603,10090.ENSMUSP00000003345,10090.ENSMUSP00000003436,10090.ENSMUSP00000003622,10090.ENSMUSP00000004428,10090.ENSMUSP00000004683,10090.ENSMUSP00000004968,10090.ENSMUSP00000005066,10090.ENSMUSP00000005406,10090.ENSMUSP00000006061…	Trappc10,Rdx,Kpnb1,Jup,Ap4e1,Ift46,Scrib,Amph,Abhd17a,Slc25a1,Clcn5,Mcoln1,Plod3,Map2k1,App,Pex1,Aplp1,Bcl2l1,Gosr1,Pea15a,Nol3,Gdi1,Rrbp1,Celsr1,Casc3,Stard3,Vmp1,Appbp2,Dync1h1,Scrn1,Nrbp2,Sema6a,Arid5b,Gnptab,Rab21,Nipal4,Kif3c,Itgb3,Rffl,Abcd4,Npc2,Ptch1,Zfyve16,Plau,Spata13,Rb1,Ank,Slc38a2,Pmm1,Arc,Nde1,Slc11a2,Igf2r,Tbc1d5,Stard4,Bin1,Npc1,Atp8b1,Fth1,Osbp,Snx15,Arl2,Map4k2,Slco3a1,Slc25a10…
GO:0006694	steroid biosynthetic process	22	78	0.6	0.0001	4	10090.ENSMUSP00000001507,10090.ENSMUSP00000006692,10090.ENSMUSP00000018311,10090.ENSMUSP00000022176,10090.ENSMUSP00000022977,10090.ENSMUSP00000025713,10090.ENSMUSP00000027356,10090.ENSMUSP00000029564,10090.ENSMUSP00000033509,10090.ENSMUSP00000033715,10090.ENSMUSP00000034015,10090.ENSMUSP00000036971,10090.ENSMUSP00000038063,10090.ENSMUSP00000046856,10090.ENSMUSP00000055313,10090.ENSMUSP00000057354…	Cyp51,Mvd,Stard3,Hmgcr,Sqle,Tm7sf2,Cyp27a1,Pmvk,Ebp,Nsdhl,Msmo1,Mvk,Dhcr24,Lss,Fdft1,Sc5d,Insig1,Dhcr7,Fdps,Srd5a1,Idi1,Hmgcs1
GO:0048858	cell projection morphogenesis	57	376	0.33	0.00011	3.95861	10090.ENSMUSP00000000127,10090.ENSMUSP00000000641,10090.ENSMUSP00000004036,10090.ENSMUSP00000005066,10090.ENSMUSP00000005406,10090.ENSMUSP00000019791,10090.ENSMUSP00000021028,10090.ENSMUSP00000021921,10090.ENSMUSP00000023774,10090.ENSMUSP00000027178,10090.ENSMUSP00000027451,10090.ENSMUSP00000028102,10090.ENSMUSP00000029587,10090.ENSMUSP00000030636,10090.ENSMUSP00000030814,10090.ENSMUSP00000030922…	Wnt3,Sema4f,Efnb3,Map2k1,App,Sema6a,Itgb3,Ptch1,Slc11a2,Als2,Epha4,Kif5c,Neurog2,Stmn1,Cdk5,Prkcz,Pak1,Pvrl1,Fez1,Ntng2,Shtn1,Sema7a,Dicer1,Ugt8a,Picalm,Atxn2,Map6,Tubb3,Mink1,Cxcl12,Cdh11,Btbd3,Abl1,Unc5b,Dock10,Apc,Cntn2,Ank3,Lama2,Nfasc,Srgap2,Dst,Kif5a,Cnp,Zswim6,Unc5c,Gas7,Ptk2,Epb4.1l3,Klf7,Fgfr2,Ddr1,Dact1,Apbb2,Vldlr,Myo9b,Auts2
GO:0016043	cellular component organization	368	4092	0.1	0.00012	3.92082	10090.ENSMUSP00000000127,10090.ENSMUSP00000000384,10090.ENSMUSP00000000590,10090.ENSMUSP00000000641,10090.ENSMUSP00000000724,10090.ENSMUSP00000000958,10090.ENSMUSP00000001181,10090.ENSMUSP00000001479,10090.ENSMUSP00000001592,10090.ENSMUSP00000002081,10090.ENSMUSP00000002099,10090.ENSMUSP00000002603,10090.ENSMUSP00000002889,10090.ENSMUSP00000004036,10090.ENSMUSP00000004683,10090.ENSMUSP00000004968…	Wnt3,Trappc10,Rdx,Sema4f,Kat2b,Top1mt,Col6a2,Kpnb1,Jup,Srpk3,Ift46,Scrib,Flii,Efnb3,Mcoln1,Plod3,Hapln2,Map2k1,Ndrg1,App,Ctr9,Pex1,Aplp1,Bcl2l1,Gosr1,Nol3,Tppp3,Gdi1,Mpp2,Stard3,Vmp1,Dync1h1,Sema6a,Reep3,Gnptab,Rab21,Dnmt3a,Itgb3,Xrcc3,Sema4d,Ptch1,Tppp,Hmgcr,Ldb3,Spata13,Lect1,Sorbs3,Rb1,Fam134b,Arc,Cep97,Prkdc,Nde1,Kmt2d,Slc11a2,Fgfr1op,Bin1,Npc1,Atp8b1,Fech,Atl3,Arl2,Apool,Smad7,Als2,Epha4,Efh…
GO:0032989	cellular component morphogenesis	84	651	0.26	0.00013	3.88606	10090.ENSMUSP00000000127,10090.ENSMUSP00000000641,10090.ENSMUSP00000002603,10090.ENSMUSP00000004036,10090.ENSMUSP00000004968,10090.ENSMUSP00000005066,10090.ENSMUSP00000005406,10090.ENSMUSP00000007803,10090.ENSMUSP00000019791,10090.ENSMUSP00000021028,10090.ENSMUSP00000021921,10090.ENSMUSP00000022327,10090.ENSMUSP00000022603,10090.ENSMUSP00000022701,10090.ENSMUSP00000023774,10090.ENSMUSP00000027178…	Wnt3,Sema4f,Scrib,Efnb3,Plod3,Map2k1,App,Bcl2l1,Sema6a,Itgb3,Ptch1,Ldb3,Lect1,Rb1,Slc11a2,Als2,Epha4,Kif5c,Tyro3,Neurog2,Murc,Stmn1,Cdk5,Prkcz,Pak1,Mtmr2,Pvrl1,Fez1,Ntng2,Shtn1,Clic4,Sema7a,Dicer1,Ugt8a,Picalm,Lipa,Atxn2,Lmod1,Map6,Tubb3,Mink1,Cxcl12,Cdh11,Btbd3,Abl1,Unc5b,Dock10,Apc,Myh6,Mpp5,Cntn2,Mfn1,Ank3,Lama2,Nfasc,Srgap2,Dst,Tmod2,Kif5a,Mtm1,Cnp,Zswim6,Unc5c,Tenm4,Srcin1,Tmod1,Gas7,Ptk2,Ep…
GO:0050767	regulation of neurogenesis	91	727	0.24	0.00013	3.88606	10090.ENSMUSP00000000127,10090.ENSMUSP00000000641,10090.ENSMUSP00000000724,10090.ENSMUSP00000003369,10090.ENSMUSP00000004036,10090.ENSMUSP00000005066,10090.ENSMUSP00000005406,10090.ENSMUSP00000008878,10090.ENSMUSP00000014743,10090.ENSMUSP00000015435,10090.ENSMUSP00000015858,10090.ENSMUSP00000019791,10090.ENSMUSP00000020343,10090.ENSMUSP00000020999,10090.ENSMUSP00000021119,10090.ENSMUSP00000021900…	Wnt3,Sema4f,Kat2b,Plag1,Efnb3,Map2k1,App,Gprc5b,Csf1,Gdi1,Cers2,Sema6a,Rab21,Kif3c,Aspa,Sema4d,Arc,Bin1,Epha4,Slc45a3,Bmp2,Neurog2,Cdk5,Scarb2,Rasal1,Sh3gl3,Pak1,Sall1,Fez1,Ldlr,Tmem30a,Trf,Gdpd5,Lzts3,Mmd2,Shtn1,Sema7a,Ssh2,Dicer1,Ttbk1,Inpp5f,Inpp5j,Rims2,Ctnna1,Kndc1,Picalm,Daam2,Lpar1,Itsn2,Rap2a,Rnf112,Zfp536,Sorl1,Kctd11,Map6,Cxcl12,Abl1,Cyb5d2,Golga4,Smurf1,Cntn2,Dlg5,Rap1a,Mfn1,Il1rap,Srg…
GO:0051641	cellular localization	171	1632	0.17	0.00013	3.88606	10090.ENSMUSP00000000384,10090.ENSMUSP00000000590,10090.ENSMUSP00000001479,10090.ENSMUSP00000001592,10090.ENSMUSP00000002063,10090.ENSMUSP00000002099,10090.ENSMUSP00000002603,10090.ENSMUSP00000003345,10090.ENSMUSP00000003436,10090.ENSMUSP00000004683,10090.ENSMUSP00000005066,10090.ENSMUSP00000005406,10090.ENSMUSP00000006061,10090.ENSMUSP00000007803,10090.ENSMUSP00000010536,10090.ENSMUSP00000014920…	Trappc10,Rdx,Kpnb1,Jup,Ap4e1,Ift46,Scrib,Amph,Abhd17a,Mcoln1,Map2k1,App,Pex1,Bcl2l1,Gosr1,Nol3,Celsr1,Casc3,Stard3,Appbp2,Dync1h1,Nrbp2,Sema6a,Gnptab,Rab21,Kif3c,Rffl,Npc2,Ptch1,Zfyve16,Rb1,Pmm1,Nde1,Slc11a2,Tbc1d5,Stard4,Bin1,Npc1,Fth1,Snx15,Arl2,Map4k2,Smad7,Als2,Stx6,Kif5c,Gsn,Mal,Fam83d,Sec62,Leprot,Slc6a9,Atg4c,Cdk5,Prkcz,Uso1,Scarb2,Stx2,Sh3gl3,Arl6ip1,Pak1,Lamp1,Ddhd2,Heatr3,Fez1,Ldlr,Tmem…
GO:0032502	developmental process	392	4414	0.1	0.00013	3.88606	10090.ENSMUSP00000000127,10090.ENSMUSP00000000153,10090.ENSMUSP00000000590,10090.ENSMUSP00000000641,10090.ENSMUSP00000000724,10090.ENSMUSP00000001592,10090.ENSMUSP00000002081,10090.ENSMUSP00000002418,10090.ENSMUSP00000002603,10090.ENSMUSP00000002889,10090.ENSMUSP00000003369,10090.ENSMUSP00000003501,10090.ENSMUSP00000003612,10090.ENSMUSP00000004036,10090.ENSMUSP00000004968,10090.ENSMUSP00000005014…	Wnt3,Gna12,Rdx,Sema4f,Kat2b,Jup,Srpk3,Borcs8,Scrib,Flii,Plag1,Elavl3,Dusp3,Efnb3,Plod3,Hapln2,Map2k1,Prkacb,Ndrg1,App,Ctr9,Aplp1,Pip4k2a,Bcl2l1,Gprc5b,Adam19,Csf1,Nol3,Gdi1,Cers2,Qdpr,Celsr1,Nkap,Rab11fip4,Vmp1,Plod1,Nrbp2,Sema6a,Calr3,Arid5b,Rab21,Dnmt3a,Kif3c,Itgb3,Aspa,Sema4d,Ptch1,Ctsl,Hmgcr,Ldb3,Plau,Lect1,Bmp1,Rb1,Bcl2l2,Slc38a2,Litaf,Arc,Prkdc,Nde1,Kmt2d,Slc11a2,Igf2r,Bin1,Gabbr1,Atp8b1,Fe…
GO:0030029	actin filament-based process	61	420	0.31	0.00014	3.85387	10090.ENSMUSP00000002889,10090.ENSMUSP00000022327,10090.ENSMUSP00000022682,10090.ENSMUSP00000027677,10090.ENSMUSP00000028239,10090.ENSMUSP00000030033,10090.ENSMUSP00000030814,10090.ENSMUSP00000030922,10090.ENSMUSP00000032924,10090.ENSMUSP00000033040,10090.ENSMUSP00000035158,10090.ENSMUSP00000037192,10090.ENSMUSP00000038351,10090.ENSMUSP00000038915,10090.ENSMUSP00000039103,10090.ENSMUSP00000040176…	Flii,Ldb3,Sorbs3,Csrp1,Gsn,Murc,Cdk5,Prkcz,Kctd13,Pak1,Trf,Kcnj2,Foxj1,Rhou,Atp2c1,Thsd7a,Tesk2,Shtn1,Coro2b,Ssh2,Pak7,Coro7,Ctnna1,Cacna2d1,Daam2,Rap2a,Cdc42ep2,Acap2,Lmod1,Dlg1,Actn4,Mobp,Mink1,Lrrc16a,Abl1,Mical3,Myh6,Daam1,Arpc1b,Ermn,Srgap2,Rhog,Tmod2,Inf2,Limch1,Phactr4,Tmod1,Gas7,Cdc42bpa,Pdcd6ip,Epb4.1l3,Shroom3,Add1,Lcp1,Ablim2,Apbb2,Myl6,Myo9b,Myo18a,Prox1,Auts2
GO:0120039	plasma membrane bounded cell projection morphogenesis	56	373	0.32	0.00015	3.82391	10090.ENSMUSP00000000127,10090.ENSMUSP00000000641,10090.ENSMUSP00000004036,10090.ENSMUSP00000005066,10090.ENSMUSP00000005406,10090.ENSMUSP00000019791,10090.ENSMUSP00000021921,10090.ENSMUSP00000023774,10090.ENSMUSP00000027178,10090.ENSMUSP00000027451,10090.ENSMUSP00000028102,10090.ENSMUSP00000029587,10090.ENSMUSP00000030636,10090.ENSMUSP00000030814,10090.ENSMUSP00000030922,10090.ENSMUSP00000033040…	Wnt3,Sema4f,Efnb3,Map2k1,App,Sema6a,Ptch1,Slc11a2,Als2,Epha4,Kif5c,Neurog2,Stmn1,Cdk5,Prkcz,Pak1,Pvrl1,Fez1,Ntng2,Shtn1,Sema7a,Dicer1,Ugt8a,Picalm,Atxn2,Map6,Tubb3,Mink1,Cxcl12,Cdh11,Btbd3,Abl1,Unc5b,Dock10,Apc,Cntn2,Ank3,Lama2,Nfasc,Srgap2,Dst,Kif5a,Cnp,Zswim6,Unc5c,Gas7,Ptk2,Epb4.1l3,Klf7,Fgfr2,Ddr1,Dact1,Apbb2,Vldlr,Myo9b,Auts2
GO:0051960	regulation of nervous system development	98	806	0.23	0.00015	3.82391	10090.ENSMUSP00000000127,10090.ENSMUSP00000000641,10090.ENSMUSP00000000724,10090.ENSMUSP00000003369,10090.ENSMUSP00000004036,10090.ENSMUSP00000005066,10090.ENSMUSP00000005164,10090.ENSMUSP00000005406,10090.ENSMUSP00000008878,10090.ENSMUSP00000014743,10090.ENSMUSP00000015435,10090.ENSMUSP00000015858,10090.ENSMUSP00000016172,10090.ENSMUSP00000019791,10090.ENSMUSP00000020343,10090.ENSMUSP00000020999…	Wnt3,Sema4f,Kat2b,Plag1,Efnb3,Map2k1,Prkacb,App,Gprc5b,Csf1,Gdi1,Cers2,Celsr1,Sema6a,Rab21,Kif3c,Aspa,Sema4d,Arc,Bin1,Epha4,Slc45a3,Bmp2,Neurog2,Cdk5,Scarb2,Rasal1,Sh3gl3,Pak1,Sall1,Mtmr2,Pvrl1,Fez1,Ldlr,Tmem30a,Trf,Gdpd5,Lzts3,Mmd2,Shtn1,Sema7a,Ssh2,Dicer1,Ttbk1,Inpp5f,Inpp5j,Rims2,Ctnna1,Kndc1,Picalm,Daam2,Lpar1,Itsn2,Rap2a,Rnf112,Zfp536,Sorl1,Kctd11,Dlg1,Map6,Lingo2,Cxcl12,Abl1,Cyb5d2,Golga4,S…
GO:0060284	regulation of cell development	101	841	0.23	0.00016	3.79588	10090.ENSMUSP00000000127,10090.ENSMUSP00000000641,10090.ENSMUSP00000000724,10090.ENSMUSP00000003369,10090.ENSMUSP00000004036,10090.ENSMUSP00000005066,10090.ENSMUSP00000005406,10090.ENSMUSP00000008878,10090.ENSMUSP00000014743,10090.ENSMUSP00000015435,10090.ENSMUSP00000015858,10090.ENSMUSP00000019791,10090.ENSMUSP00000020343,10090.ENSMUSP00000020999,10090.ENSMUSP00000021028,10090.ENSMUSP00000021119…	Wnt3,Sema4f,Kat2b,Plag1,Efnb3,Map2k1,App,Gprc5b,Csf1,Gdi1,Cers2,Sema6a,Rab21,Kif3c,Itgb3,Aspa,Sema4d,Arc,Bin1,Epha4,Slc45a3,Grb14,Bmp2,Neurog2,Cdk5,Scarb2,Rasal1,Sh3gl3,Pak1,Sall1,Fez1,Ldlr,Tmem30a,Trf,Gdpd5,Dock5,Lzts3,Mmd2,Shtn1,Sema7a,Ssh2,Dicer1,Ttbk1,Inpp5f,Inpp5j,Rims2,Ctnna1,Kndc1,Picalm,Daam2,Lpar1,Itsn2,Rap2a,Rnf112,Zfp536,Sorl1,Kctd11,Map6,Actn4,Lrrc16a,Cxcl12,Abl1,Cyb5d2,Notch2,Fdps,Go…
GO:0006810	transport	267	2819	0.12	0.00016	3.79588	10090.ENSMUSP00000000384,10090.ENSMUSP00000001479,10090.ENSMUSP00000002063,10090.ENSMUSP00000002099,10090.ENSMUSP00000002603,10090.ENSMUSP00000003345,10090.ENSMUSP00000003622,10090.ENSMUSP00000004428,10090.ENSMUSP00000004683,10090.ENSMUSP00000005066,10090.ENSMUSP00000005406,10090.ENSMUSP00000006061,10090.ENSMUSP00000006828,10090.ENSMUSP00000007803,10090.ENSMUSP00000010536,10090.ENSMUSP00000013842…	Trappc10,Kpnb1,Ap4e1,Ift46,Scrib,Amph,Slc25a1,Clcn5,Mcoln1,Map2k1,App,Pex1,Aplp1,Bcl2l1,Gosr1,Pea15a,Nol3,Gdi1,Rrbp1,Casc3,Stard3,Vmp1,Appbp2,Dync1h1,Scrn1,Nrbp2,Gnptab,Rab21,Nipal4,Kif3c,Itgb3,Rffl,Abcd4,Npc2,Zfyve16,Ank,Slc38a2,Pmm1,Arc,Nde1,Slc11a2,Igf2r,Tbc1d5,Stard4,Bin1,Npc1,Atp8b1,Fth1,Osbp,Snx15,Arl2,Map4k2,Slco3a1,Slc25a10,Als2,Agap1,Slc45a3,Stx6,Tmem63a,Kif5c,Gsn,Tyro3,Car2,Sec62,Anxa5,…
GO:0051234	establishment of localization	277	2942	0.12	0.00016	3.79588	10090.ENSMUSP00000000384,10090.ENSMUSP00000000590,10090.ENSMUSP00000001479,10090.ENSMUSP00000002063,10090.ENSMUSP00000002099,10090.ENSMUSP00000002603,10090.ENSMUSP00000003345,10090.ENSMUSP00000003622,10090.ENSMUSP00000004428,10090.ENSMUSP00000004683,10090.ENSMUSP00000005066,10090.ENSMUSP00000005406,10090.ENSMUSP00000006061,10090.ENSMUSP00000006828,10090.ENSMUSP00000007803,10090.ENSMUSP00000010536…	Trappc10,Rdx,Kpnb1,Ap4e1,Ift46,Scrib,Amph,Slc25a1,Clcn5,Mcoln1,Map2k1,App,Pex1,Aplp1,Bcl2l1,Gosr1,Pea15a,Nol3,Gdi1,Rrbp1,Casc3,Stard3,Vmp1,Appbp2,Dync1h1,Scrn1,Nrbp2,Gnptab,Rab21,Nipal4,Kif3c,Itgb3,Rffl,Abcd4,Npc2,Zfyve16,Ank,Slc38a2,Pmm1,Arc,Nde1,Slc11a2,Igf2r,Tbc1d5,Stard4,Bin1,Npc1,Atp8b1,Fth1,Osbp,Snx15,Arl2,Map4k2,Slco3a1,Slc25a10,Als2,Agap1,Slc45a3,Stx6,Tmem63a,Kif5c,Gsn,Tyro3,Mal,Car2,Fam8…
GO:1901615	organic hydroxy compound metabolic process	50	321	0.34	0.0002	3.69897	10090.ENSMUSP00000001507,10090.ENSMUSP00000005406,10090.ENSMUSP00000006692,10090.ENSMUSP00000015950,10090.ENSMUSP00000020217,10090.ENSMUSP00000021424,10090.ENSMUSP00000021668,10090.ENSMUSP00000021817,10090.ENSMUSP00000021920,10090.ENSMUSP00000022176,10090.ENSMUSP00000022977,10090.ENSMUSP00000023760,10090.ENSMUSP00000025279,10090.ENSMUSP00000025482,10090.ENSMUSP00000025484,10090.ENSMUSP00000025713…	Cyp51,App,Mvd,Qdpr,Nudt4,Sptlc2,Npc2,Ippk,Sptlc1,Hmgcr,Sqle,Gpd1,Npc1,Atp8b1,Fech,Tm7sf2,Cyp27a1,Pmvk,Ebp,Nsdhl,Msmo1,Mtmr2,Ldlr,Ldlrap1,Mvk,Dhcr24,Itpk1,Gde1,Lss,Gpr37,Lipa,Napepld,Fdft1,Sc5d,Sorl1,Insig1,Aplp2,Sphk2,Dhcr7,Synj2,Fdps,Aldh1a1,Asah2,Gpd2,Ppip5k2,Slc5a3,Gk5,Vldlr,Idi1,Hmgcs1
GO:0048812	neuron projection morphogenesis	55	368	0.32	0.0002	3.69897	10090.ENSMUSP00000000127,10090.ENSMUSP00000000641,10090.ENSMUSP00000004036,10090.ENSMUSP00000005066,10090.ENSMUSP00000005406,10090.ENSMUSP00000019791,10090.ENSMUSP00000021921,10090.ENSMUSP00000023774,10090.ENSMUSP00000027178,10090.ENSMUSP00000027451,10090.ENSMUSP00000028102,10090.ENSMUSP00000029587,10090.ENSMUSP00000030636,10090.ENSMUSP00000030814,10090.ENSMUSP00000030922,10090.ENSMUSP00000033040…	Wnt3,Sema4f,Efnb3,Map2k1,App,Sema6a,Ptch1,Slc11a2,Als2,Epha4,Kif5c,Neurog2,Stmn1,Cdk5,Prkcz,Pak1,Pvrl1,Fez1,Ntng2,Shtn1,Sema7a,Dicer1,Ugt8a,Picalm,Atxn2,Map6,Tubb3,Mink1,Cxcl12,Cdh11,Btbd3,Abl1,Unc5b,Dock10,Apc,Cntn2,Ank3,Lama2,Nfasc,Srgap2,Dst,Kif5a,Cnp,Zswim6,Unc5c,Gas7,Ptk2,Epb4.1l3,Klf7,Fgfr2,Ddr1,Dact1,Apbb2,Vldlr,Auts2
GO:0048468	cell development	145	1346	0.18	0.00021	3.67778	10090.ENSMUSP00000000127,10090.ENSMUSP00000000590,10090.ENSMUSP00000000641,10090.ENSMUSP00000002603,10090.ENSMUSP00000004036,10090.ENSMUSP00000004968,10090.ENSMUSP00000005014,10090.ENSMUSP00000005066,10090.ENSMUSP00000005256,10090.ENSMUSP00000005406,10090.ENSMUSP00000006912,10090.ENSMUSP00000007803,10090.ENSMUSP00000019791,10090.ENSMUSP00000020106,10090.ENSMUSP00000021028,10090.ENSMUSP00000021119…	Wnt3,Rdx,Sema4f,Scrib,Efnb3,Plod3,Hapln2,Map2k1,Ndrg1,App,Pip4k2a,Bcl2l1,Sema6a,Arid5b,Itgb3,Aspa,Ptch1,Ldb3,Lect1,Rb1,Prkdc,Kmt2d,Slc11a2,Bin1,Atp8b1,Als2,Epha4,Efhd1,Kif5c,Gsn,Tyro3,Tspan2,Neurog2,Murc,Stmn1,Cdk5,Prkcz,Pak1,Plp1,Mtmr2,Jam3,Pvrl1,Fez1,Myo1e,Map4,Ntng2,Spef2,Gdpd5,Myo6,Git1,Foxj1,Shtn1,Clic4,Micall1,Sema7a,Fa2h,Dicer1,Hdac11,Psme4,Bpgm,Ttll5,Ctnna1,Ugt8a,Picalm,Mapk3,Lpar1,Fasn,K…
GO:0010001	glial cell differentiation	31	156	0.45	0.00029	3.5376	10090.ENSMUSP00000005066,10090.ENSMUSP00000005256,10090.ENSMUSP00000005406,10090.ENSMUSP00000021119,10090.ENSMUSP00000028239,10090.ENSMUSP00000029451,10090.ENSMUSP00000030814,10090.ENSMUSP00000033800,10090.ENSMUSP00000043597,10090.ENSMUSP00000043676,10090.ENSMUSP00000043828,10090.ENSMUSP00000051619,10090.ENSMUSP00000052581,10090.ENSMUSP00000054356,10090.ENSMUSP00000055000,10090.ENSMUSP00000055094…	Map2k1,Ndrg1,App,Aspa,Gsn,Tspan2,Cdk5,Plp1,Fa2h,Dicer1,Hdac11,Mapk3,Lpar1,Kcnj10,Adam22,Sh3tc2,Phgdh,Nab1,Abl1,Mpp5,Erbb3,Arhgef10,Cntn2,Lama2,Cnp,Tenm4,Stat3,Pou3f1,Slc8a3,Myrf,Mag
GO:0050769	positive regulation of neurogenesis	62	448	0.29	0.00038	3.42022	10090.ENSMUSP00000000127,10090.ENSMUSP00000000724,10090.ENSMUSP00000003369,10090.ENSMUSP00000005066,10090.ENSMUSP00000005406,10090.ENSMUSP00000008878,10090.ENSMUSP00000014743,10090.ENSMUSP00000015435,10090.ENSMUSP00000019791,10090.ENSMUSP00000020343,10090.ENSMUSP00000020999,10090.ENSMUSP00000021119,10090.ENSMUSP00000021900,10090.ENSMUSP00000025239,10090.ENSMUSP00000027451,10090.ENSMUSP00000028836…	Wnt3,Kat2b,Plag1,Map2k1,App,Gprc5b,Csf1,Gdi1,Sema6a,Rab21,Kif3c,Aspa,Sema4d,Bin1,Epha4,Bmp2,Neurog2,Scarb2,Rasal1,Sh3gl3,Pak1,Sall1,Fez1,Tmem30a,Trf,Gdpd5,Mmd2,Shtn1,Sema7a,Dicer1,Ttbk1,Rims2,Picalm,Lpar1,Itsn2,Rnf112,Kctd11,Map6,Cxcl12,Cyb5d2,Golga4,Smurf1,Dlg5,Rap1a,Mfn1,Il1rap,Hspa5,Ptn,Nfe2l2,Ptprd,Rtn4,Tenm4,Ptk2,Eurl,Cdon,Cpeb3,Vldlr,Zfyve27,Enpp2,Prox1,Mag,Tenm3
GO:0010720	positive regulation of cell development	68	509	0.27	0.00038	3.42022	10090.ENSMUSP00000000127,10090.ENSMUSP00000000724,10090.ENSMUSP00000003369,10090.ENSMUSP00000005066,10090.ENSMUSP00000005406,10090.ENSMUSP00000008878,10090.ENSMUSP00000014743,10090.ENSMUSP00000015435,10090.ENSMUSP00000019791,10090.ENSMUSP00000020343,10090.ENSMUSP00000020999,10090.ENSMUSP00000021028,10090.ENSMUSP00000021119,10090.ENSMUSP00000021900,10090.ENSMUSP00000025239,10090.ENSMUSP00000027451…	Wnt3,Kat2b,Plag1,Map2k1,App,Gprc5b,Csf1,Gdi1,Sema6a,Rab21,Kif3c,Itgb3,Aspa,Sema4d,Bin1,Epha4,Bmp2,Neurog2,Scarb2,Rasal1,Sh3gl3,Pak1,Sall1,Fez1,Tmem30a,Trf,Gdpd5,Dock5,Mmd2,Shtn1,Sema7a,Dicer1,Ttbk1,Rims2,Picalm,Lpar1,Itsn2,Rnf112,Kctd11,Map6,Lrrc16a,Cxcl12,Abl1,Cyb5d2,Fdps,Golga4,Smurf1,Dlg5,Rap1a,Mfn1,Il1rap,Hspa5,Ptn,Nfe2l2,Ptprd,Rtn4,Tenm4,Ptk2,Eurl,Add1,Cdon,Cpeb3,Vldlr,Zfyve27,Enpp2,Prox1,Ma…
GO:1901617	organic hydroxy compound biosynthetic process	27	127	0.47	0.00041	3.38722	10090.ENSMUSP00000001507,10090.ENSMUSP00000006692,10090.ENSMUSP00000015950,10090.ENSMUSP00000021424,10090.ENSMUSP00000021817,10090.ENSMUSP00000021920,10090.ENSMUSP00000022176,10090.ENSMUSP00000022977,10090.ENSMUSP00000025713,10090.ENSMUSP00000027356,10090.ENSMUSP00000029564,10090.ENSMUSP00000033509,10090.ENSMUSP00000033715,10090.ENSMUSP00000034015,10090.ENSMUSP00000036971,10090.ENSMUSP00000038063…	Cyp51,Mvd,Qdpr,Sptlc2,Ippk,Sptlc1,Hmgcr,Sqle,Tm7sf2,Cyp27a1,Pmvk,Ebp,Nsdhl,Msmo1,Mvk,Dhcr24,Lss,Gpr37,Fdft1,Sc5d,Insig1,Sphk2,Dhcr7,Fdps,Ppip5k2,Idi1,Hmgcs1
GO:0021782	glial cell development	22	89	0.54	0.00042	3.37675	10090.ENSMUSP00000005256,10090.ENSMUSP00000005406,10090.ENSMUSP00000021119,10090.ENSMUSP00000028239,10090.ENSMUSP00000029451,10090.ENSMUSP00000030814,10090.ENSMUSP00000033800,10090.ENSMUSP00000043597,10090.ENSMUSP00000043676,10090.ENSMUSP00000043828,10090.ENSMUSP00000052581,10090.ENSMUSP00000054356,10090.ENSMUSP00000055000,10090.ENSMUSP00000055094,10090.ENSMUSP00000064755,10090.ENSMUSP00000080683…	Ndrg1,App,Aspa,Gsn,Tspan2,Cdk5,Plp1,Fa2h,Dicer1,Hdac11,Lpar1,Kcnj10,Adam22,Sh3tc2,Phgdh,Mpp5,Arhgef10,Cntn2,Tenm4,Pou3f1,Myrf,Mag
GO:0042063	gliogenesis	35	195	0.4	0.00045	3.34679	10090.ENSMUSP00000002603,10090.ENSMUSP00000005066,10090.ENSMUSP00000005256,10090.ENSMUSP00000005406,10090.ENSMUSP00000021119,10090.ENSMUSP00000027451,10090.ENSMUSP00000028239,10090.ENSMUSP00000029451,10090.ENSMUSP00000030814,10090.ENSMUSP00000033800,10090.ENSMUSP00000043597,10090.ENSMUSP00000043676,10090.ENSMUSP00000043828,10090.ENSMUSP00000051619,10090.ENSMUSP00000052581,10090.ENSMUSP00000054356…	Scrib,Map2k1,Ndrg1,App,Aspa,Epha4,Gsn,Tspan2,Cdk5,Plp1,Fa2h,Dicer1,Hdac11,Mapk3,Lpar1,Kcnj10,Adam22,Sh3tc2,Phgdh,Nab1,Abl1,Mpp5,Erbb3,Arhgef10,Cntn2,Lama2,Srgap2,Cnp,Rtn4,Tenm4,Stat3,Pou3f1,Slc8a3,Myrf,Mag
GO:0000902	cell morphogenesis	73	568	0.26	0.00051	3.29243	10090.ENSMUSP00000000127,10090.ENSMUSP00000000641,10090.ENSMUSP00000002603,10090.ENSMUSP00000004036,10090.ENSMUSP00000004968,10090.ENSMUSP00000005066,10090.ENSMUSP00000005406,10090.ENSMUSP00000019791,10090.ENSMUSP00000021028,10090.ENSMUSP00000021921,10090.ENSMUSP00000022603,10090.ENSMUSP00000022701,10090.ENSMUSP00000023774,10090.ENSMUSP00000027178,10090.ENSMUSP00000027451,10090.ENSMUSP00000028102…	Wnt3,Sema4f,Scrib,Efnb3,Plod3,Map2k1,App,Sema6a,Itgb3,Ptch1,Lect1,Rb1,Slc11a2,Als2,Epha4,Kif5c,Tyro3,Neurog2,Stmn1,Cdk5,Prkcz,Pak1,Pvrl1,Fez1,Ntng2,Shtn1,Clic4,Sema7a,Dicer1,Ugt8a,Picalm,Lipa,Atxn2,Map6,Tubb3,Mink1,Cxcl12,Cdh11,Btbd3,Abl1,Unc5b,Dock10,Apc,Cntn2,Ank3,Lama2,Nfasc,Srgap2,Dst,Kif5a,Cnp,Zswim6,Unc5c,Tenm4,Srcin1,Gas7,Ptk2,Epb4.1l3,Shroom3,Klf7,Add1,Map7,Fgfr2,Ddr1,Dact1,Heg1,Apbb2,Vld…
GO:0030154	cell differentiation	270	2908	0.11	0.00051	3.29243	10090.ENSMUSP00000000127,10090.ENSMUSP00000000153,10090.ENSMUSP00000000590,10090.ENSMUSP00000000641,10090.ENSMUSP00000000724,10090.ENSMUSP00000002081,10090.ENSMUSP00000002603,10090.ENSMUSP00000003369,10090.ENSMUSP00000003501,10090.ENSMUSP00000004036,10090.ENSMUSP00000004968,10090.ENSMUSP00000005014,10090.ENSMUSP00000005066,10090.ENSMUSP00000005256,10090.ENSMUSP00000005406,10090.ENSMUSP00000005749…	Wnt3,Gna12,Rdx,Sema4f,Kat2b,Srpk3,Scrib,Plag1,Elavl3,Efnb3,Plod3,Hapln2,Map2k1,Ndrg1,App,Ctr9,Pip4k2a,Bcl2l1,Gprc5b,Csf1,Nol3,Gdi1,Cers2,Celsr1,Nkap,Nrbp2,Sema6a,Calr3,Arid5b,Rab21,Dnmt3a,Kif3c,Itgb3,Aspa,Sema4d,Ptch1,Ctsl,Hmgcr,Ldb3,Lect1,Bmp1,Rb1,Arc,Prkdc,Nde1,Kmt2d,Slc11a2,Bin1,Gabbr1,Atp8b1,Fech,Als2,Epha4,Efhd1,Slc45a3,Kif5c,Gsn,Tyro3,Bmp2,Fam83d,Tspan2,Neurog2,Zbtb7b,Murc,Stmn1,Cdk5,Prkcz,…
GO:0031344	regulation of cell projection organization	77	613	0.25	0.00059	3.22915	10090.ENSMUSP00000000127,10090.ENSMUSP00000000590,10090.ENSMUSP00000000641,10090.ENSMUSP00000000724,10090.ENSMUSP00000002099,10090.ENSMUSP00000004036,10090.ENSMUSP00000005066,10090.ENSMUSP00000008878,10090.ENSMUSP00000015435,10090.ENSMUSP00000015858,10090.ENSMUSP00000020343,10090.ENSMUSP00000020999,10090.ENSMUSP00000021900,10090.ENSMUSP00000023268,10090.ENSMUSP00000023270,10090.ENSMUSP00000025482…	Wnt3,Rdx,Sema4f,Kat2b,Ift46,Efnb3,Map2k1,Gprc5b,Gdi1,Cers2,Rab21,Kif3c,Sema4d,Arc,Cep97,Atp8b1,Epha4,Cdk5,Scarb2,Rasal1,Pak1,Fez1,Tmem30a,Map4,Lzts3,Cyld,Shtn1,Sema7a,Ssh2,Anln,Inpp5f,Inpp5j,Rims2,Kndc1,Picalm,Lpar1,Itsn2,Abhd17b,Rap2a,Cdc42ep2,Tapt1,Map6,Cenpj,Lrrc16a,Cxcl12,Abl1,Apc,Golga4,Smurf1,Cntn2,Dlg5,Rap1a,Ermn,Mfn1,Prnp,Il1rap,Rhog,Hspa5,Ptn,Aatk,Nfe2l2,Rapgef4,Ptprd,Rtn4,Ccp110,Srcin1,…
GO:0120035	regulation of plasma membrane bounded cell projection organization	76	604	0.25	0.00063	3.20066	10090.ENSMUSP00000000127,10090.ENSMUSP00000000590,10090.ENSMUSP00000000641,10090.ENSMUSP00000000724,10090.ENSMUSP00000002099,10090.ENSMUSP00000004036,10090.ENSMUSP00000005066,10090.ENSMUSP00000008878,10090.ENSMUSP00000015435,10090.ENSMUSP00000015858,10090.ENSMUSP00000020343,10090.ENSMUSP00000020999,10090.ENSMUSP00000021900,10090.ENSMUSP00000023268,10090.ENSMUSP00000023270,10090.ENSMUSP00000025482…	Wnt3,Rdx,Sema4f,Kat2b,Ift46,Efnb3,Map2k1,Gprc5b,Gdi1,Cers2,Rab21,Kif3c,Sema4d,Arc,Cep97,Atp8b1,Epha4,Cdk5,Scarb2,Rasal1,Pak1,Fez1,Tmem30a,Map4,Lzts3,Cyld,Shtn1,Sema7a,Ssh2,Anln,Inpp5f,Inpp5j,Rims2,Kndc1,Picalm,Lpar1,Itsn2,Abhd17b,Rap2a,Cdc42ep2,Tapt1,Map6,Cenpj,Lrrc16a,Cxcl12,Abl1,Apc,Golga4,Smurf1,Cntn2,Dlg5,Rap1a,Mfn1,Prnp,Il1rap,Rhog,Hspa5,Ptn,Aatk,Nfe2l2,Rapgef4,Ptprd,Rtn4,Ccp110,Srcin1,Ptk2,…
GO:0045664	regulation of neuron differentiation	75	595	0.25	0.00067	3.17393	10090.ENSMUSP00000000127,10090.ENSMUSP00000000641,10090.ENSMUSP00000000724,10090.ENSMUSP00000004036,10090.ENSMUSP00000005066,10090.ENSMUSP00000005406,10090.ENSMUSP00000008878,10090.ENSMUSP00000015435,10090.ENSMUSP00000015858,10090.ENSMUSP00000020343,10090.ENSMUSP00000020999,10090.ENSMUSP00000021900,10090.ENSMUSP00000023268,10090.ENSMUSP00000025239,10090.ENSMUSP00000027451,10090.ENSMUSP00000028836…	Wnt3,Sema4f,Kat2b,Efnb3,Map2k1,App,Gprc5b,Gdi1,Cers2,Rab21,Kif3c,Sema4d,Arc,Bin1,Epha4,Bmp2,Neurog2,Cdk5,Scarb2,Rasal1,Sh3gl3,Pak1,Sall1,Fez1,Tmem30a,Gdpd5,Lzts3,Mmd2,Shtn1,Sema7a,Ssh2,Dicer1,Inpp5f,Inpp5j,Rims2,Kndc1,Picalm,Lpar1,Itsn2,Rap2a,Rnf112,Zfp536,Kctd11,Map6,Cxcl12,Abl1,Cyb5d2,Golga4,Smurf1,Cntn2,Dlg5,Rap1a,Mfn1,Il1rap,Hspa5,Ptn,Aatk,Nfe2l2,Rapgef4,Ptprd,Rtn4,Srcin1,Ptk2,Mgll,Eurl,Spg20…
GO:0048869	cellular developmental process	274	2976	0.11	0.00072	3.14267	10090.ENSMUSP00000000127,10090.ENSMUSP00000000153,10090.ENSMUSP00000000590,10090.ENSMUSP00000000641,10090.ENSMUSP00000000724,10090.ENSMUSP00000002081,10090.ENSMUSP00000002603,10090.ENSMUSP00000003369,10090.ENSMUSP00000003501,10090.ENSMUSP00000004036,10090.ENSMUSP00000004968,10090.ENSMUSP00000005014,10090.ENSMUSP00000005066,10090.ENSMUSP00000005256,10090.ENSMUSP00000005406,10090.ENSMUSP00000005749…	Wnt3,Gna12,Rdx,Sema4f,Kat2b,Srpk3,Scrib,Plag1,Elavl3,Efnb3,Plod3,Hapln2,Map2k1,Ndrg1,App,Ctr9,Pip4k2a,Bcl2l1,Gprc5b,Csf1,Nol3,Gdi1,Cers2,Celsr1,Nkap,Nrbp2,Sema6a,Calr3,Arid5b,Rab21,Dnmt3a,Kif3c,Itgb3,Aspa,Sema4d,Ptch1,Ctsl,Hmgcr,Ldb3,Lect1,Bmp1,Rb1,Arc,Prkdc,Nde1,Kmt2d,Slc11a2,Bin1,Gabbr1,Atp8b1,Fech,Als2,Epha4,Efhd1,Slc45a3,Kif5c,Gsn,Tyro3,Bmp2,Fam83d,Tspan2,Neurog2,Zbtb7b,Murc,Stmn1,Cdk5,Prkcz,…
GO:0030036	actin cytoskeleton organization	53	371	0.3	0.00074	3.13077	10090.ENSMUSP00000002889,10090.ENSMUSP00000022327,10090.ENSMUSP00000022682,10090.ENSMUSP00000027677,10090.ENSMUSP00000028239,10090.ENSMUSP00000030033,10090.ENSMUSP00000030814,10090.ENSMUSP00000030922,10090.ENSMUSP00000032924,10090.ENSMUSP00000033040,10090.ENSMUSP00000035158,10090.ENSMUSP00000038351,10090.ENSMUSP00000038915,10090.ENSMUSP00000039103,10090.ENSMUSP00000040176,10090.ENSMUSP00000041009…	Flii,Ldb3,Sorbs3,Csrp1,Gsn,Murc,Cdk5,Prkcz,Kctd13,Pak1,Trf,Foxj1,Rhou,Atp2c1,Thsd7a,Tesk2,Shtn1,Coro2b,Ssh2,Pak7,Coro7,Ctnna1,Daam2,Rap2a,Cdc42ep2,Lmod1,Dlg1,Actn4,Mink1,Lrrc16a,Abl1,Mical3,Myh6,Daam1,Arpc1b,Ermn,Rhog,Tmod2,Inf2,Limch1,Phactr4,Tmod1,Gas7,Cdc42bpa,Pdcd6ip,Epb4.1l3,Shroom3,Add1,Lcp1,Ablim2,Myo18a,Prox1,Auts2
GO:0061564	axon development	44	286	0.33	0.00086	3.0655	10090.ENSMUSP00000000127,10090.ENSMUSP00000000641,10090.ENSMUSP00000004036,10090.ENSMUSP00000005406,10090.ENSMUSP00000019791,10090.ENSMUSP00000021921,10090.ENSMUSP00000027178,10090.ENSMUSP00000027451,10090.ENSMUSP00000028102,10090.ENSMUSP00000029451,10090.ENSMUSP00000029587,10090.ENSMUSP00000030636,10090.ENSMUSP00000030814,10090.ENSMUSP00000033800,10090.ENSMUSP00000034472,10090.ENSMUSP00000034510…	Wnt3,Sema4f,Efnb3,App,Sema6a,Ptch1,Als2,Epha4,Kif5c,Tspan2,Neurog2,Stmn1,Cdk5,Plp1,Jam3,Pvrl1,Fez1,Ntng2,Shtn1,Sema7a,Ctnna1,Picalm,Tubb3,Cxcl12,Cdh11,Abl1,Unc5b,Apc,Cntn2,Ank3,Lama2,Nfasc,Dst,Kif5a,Cnp,Rtn4,Unc5c,Ptk2,Klf7,Fgfr2,Ddr1,Apod,Apbb2,Auts2
GO:0022604	regulation of cell morphogenesis	58	427	0.28	0.001	3	10090.ENSMUSP00000000127,10090.ENSMUSP00000000153,10090.ENSMUSP00000000590,10090.ENSMUSP00000000641,10090.ENSMUSP00000004036,10090.ENSMUSP00000005066,10090.ENSMUSP00000015435,10090.ENSMUSP00000020343,10090.ENSMUSP00000021028,10090.ENSMUSP00000021900,10090.ENSMUSP00000023268,10090.ENSMUSP00000027451,10090.ENSMUSP00000030814,10090.ENSMUSP00000031221,10090.ENSMUSP00000031606,10090.ENSMUSP00000033040…	Wnt3,Gna12,Rdx,Sema4f,Efnb3,Map2k1,Gdi1,Rab21,Itgb3,Sema4d,Arc,Epha4,Cdk5,Cdc7,Rasal1,Pak1,Dock5,Lzts3,Rhou,Shtn1,Sema7a,Ssh2,Ttbk1,Rims2,Kndc1,Picalm,Lpar1,Itsn2,Rap2a,Cdc42ep2,Dlg1,Map6,Actn4,Lrrc16a,Cxcl12,Sema3e,Abl1,Golga4,Smurf1,Cntn2,Ermn,Mfn1,Ptn,Aatk,Ptprd,Rtn4,Srcin1,Gas7,Fitm2,Ptk2,Sh3kbp1,Epb4.1l3,Shroom3,Mgll,Spg20,Zfyve27,Enpp2,Mag
GO:0044281	small molecule metabolic process	137	1304	0.17	0.001	3	10090.ENSMUSP00000001507,10090.ENSMUSP00000002603,10090.ENSMUSP00000004137,10090.ENSMUSP00000004968,10090.ENSMUSP00000005406,10090.ENSMUSP00000006557,10090.ENSMUSP00000006692,10090.ENSMUSP00000006697,10090.ENSMUSP00000007005,10090.ENSMUSP00000015950,10090.ENSMUSP00000018311,10090.ENSMUSP00000019199,10090.ENSMUSP00000019721,10090.ENSMUSP00000020217,10090.ENSMUSP00000020957,10090.ENSMUSP00000021119…	Cyp51,Scrib,Gstm7,Plod3,App,Elovl1,Mvd,Itih3,Acat2,Qdpr,Stard3,Plod1,Pdk4,Nudt4,Adi1,Aspa,Sptlc2,Abcd4,Npc2,Ippk,Sptlc1,Hmgcr,Elovl7,Tkt,Sqle,Pmm1,Ehhadh,Gpd1,Agpat4,Enpp4,Npc1,Atp8b1,Fech,Tm7sf2,Scd2,Pde8a,Alox5,Itih5,Cyp27a1,Kif5c,Acss2,Pmvk,Hadh,Gclm,Ctps,Cds1,Aacs,Mmab,Adipor2,Bcat1,Tarsl2,Fah,Ebp,Nsdhl,Plp1,Acsl1,Mtmr2,Ldlr,Gclc,Pdk3,Ldlrap1,Scd1,Mvk,Dhcr24,Faah,Agps,Icmt,Fa2h,Acsl3,Itpk1,Gd…
GO:0071840	cellular component organization or biogenesis	371	4257	0.09	0.0011	2.95861	10090.ENSMUSP00000000127,10090.ENSMUSP00000000384,10090.ENSMUSP00000000590,10090.ENSMUSP00000000641,10090.ENSMUSP00000000724,10090.ENSMUSP00000000958,10090.ENSMUSP00000001181,10090.ENSMUSP00000001479,10090.ENSMUSP00000001592,10090.ENSMUSP00000002081,10090.ENSMUSP00000002099,10090.ENSMUSP00000002603,10090.ENSMUSP00000002889,10090.ENSMUSP00000004036,10090.ENSMUSP00000004683,10090.ENSMUSP00000004968…	Wnt3,Trappc10,Rdx,Sema4f,Kat2b,Top1mt,Col6a2,Kpnb1,Jup,Srpk3,Ift46,Scrib,Flii,Efnb3,Mcoln1,Plod3,Hapln2,Map2k1,Ndrg1,App,Ctr9,Pex1,Aplp1,Bcl2l1,Gosr1,Nol3,Tppp3,Gdi1,Mpp2,Stard3,Vmp1,Dync1h1,Sema6a,Reep3,Gnptab,Rab21,Dnmt3a,Itgb3,Xrcc3,Sema4d,Ptch1,Tppp,Hmgcr,Ldb3,Spata13,Lect1,Sorbs3,Rb1,Fam134b,Arc,Cep97,Prkdc,Nde1,Kmt2d,Slc11a2,Fgfr1op,Bin1,Npc1,Atp8b1,Fech,Atl3,Arl2,Apool,Smad7,Als2,Epha4,Efh…
GO:0007264	small GTPase mediated signal transduction	32	182	0.39	0.0014	2.85387	10090.ENSMUSP00000000153,10090.ENSMUSP00000001479,10090.ENSMUSP00000015435,10090.ENSMUSP00000016172,10090.ENSMUSP00000022701,10090.ENSMUSP00000027178,10090.ENSMUSP00000030033,10090.ENSMUSP00000033040,10090.ENSMUSP00000036674,10090.ENSMUSP00000038063,10090.ENSMUSP00000038915,10090.ENSMUSP00000041378,10090.ENSMUSP00000047285,10090.ENSMUSP00000050586,10090.ENSMUSP00000053842,10090.ENSMUSP00000056433…	Gna12,Kpnb1,Gdi1,Celsr1,Rb1,Als2,Murc,Pak1,Dock5,Dhcr24,Rhou,Shtn1,Pak7,Kndc1,Dnaja3,Rap2a,Cdc42ep2,Rtkn,Rhob,Dock10,Rap1a,Psd3,Rhog,Aatk,Phactr4,Rapgef4,Ywhaq,Ralgapb,Rapgef5,Arhgef12,Myo9b,Arhgef37
GO:0048666	neuron development	81	677	0.22	0.0014	2.85387	10090.ENSMUSP00000000127,10090.ENSMUSP00000000641,10090.ENSMUSP00000002603,10090.ENSMUSP00000004036,10090.ENSMUSP00000005066,10090.ENSMUSP00000005406,10090.ENSMUSP00000019791,10090.ENSMUSP00000021921,10090.ENSMUSP00000022701,10090.ENSMUSP00000023774,10090.ENSMUSP00000025482,10090.ENSMUSP00000027178,10090.ENSMUSP00000027451,10090.ENSMUSP00000027472,10090.ENSMUSP00000028102,10090.ENSMUSP00000029451…	Wnt3,Sema4f,Scrib,Efnb3,Map2k1,App,Sema6a,Ptch1,Rb1,Slc11a2,Atp8b1,Als2,Epha4,Efhd1,Kif5c,Tspan2,Neurog2,Stmn1,Cdk5,Prkcz,Pak1,Plp1,Mtmr2,Jam3,Pvrl1,Fez1,Map4,Ntng2,Gdpd5,Myo6,Git1,Shtn1,Micall1,Sema7a,Dicer1,Ctnna1,Ugt8a,Picalm,Atxn2,Phgdh,Map6,Tubb3,Mink1,Cxcl12,Stmn4,Cdh11,Btbd3,Abl1,Unc5b,Dock10,Apc,Cntn2,Ank3,Lama2,Nfasc,Srgap2,Dst,Kif5a,Cnp,Rtn4,Zswim6,Unc5c,Tenm4,Dlg2,Gas7,Ptk2,Epb4.1l3,Pr…
GO:0046486	glycerolipid metabolic process	37	230	0.35	0.0017	2.76955	10090.ENSMUSP00000006912,10090.ENSMUSP00000023760,10090.ENSMUSP00000024594,10090.ENSMUSP00000026129,10090.ENSMUSP00000026823,10090.ENSMUSP00000031081,10090.ENSMUSP00000031273,10090.ENSMUSP00000032413,10090.ENSMUSP00000033754,10090.ENSMUSP00000033975,10090.ENSMUSP00000034046,10090.ENSMUSP00000034396,10090.ENSMUSP00000036936,10090.ENSMUSP00000044280,10090.ENSMUSP00000045351,10090.ENSMUSP00000045910…	Pip4k2a,Gpd1,Agpat4,Pcyt2,Pigq,Pi4k2b,Cds1,Etnk1,Piga,Ddhd2,Acsl1,Mtmr2,Scd1,Pcyt1b,Pigk,Inpp5f,Inpp5j,Pigm,Napepld,Insig1,Far1,Cept1,Prdx6,Synj2,Pgap1,Mtm1,Cds2,Plch2,Pigc,Mgll,Inpp4a,Gk5,Etnk2,Ept1,Tmem55b,Enpp2,Pign
GO:0007422	peripheral nervous system development	16	57	0.6	0.0018	2.74473	10090.ENSMUSP00000005014,10090.ENSMUSP00000005256,10090.ENSMUSP00000030814,10090.ENSMUSP00000043597,10090.ENSMUSP00000043676,10090.ENSMUSP00000055000,10090.ENSMUSP00000055094,10090.ENSMUSP00000066696,10090.ENSMUSP00000080683,10090.ENSMUSP00000080716,10090.ENSMUSP00000081225,10090.ENSMUSP00000090304,10090.ENSMUSP00000092148,10090.ENSMUSP00000109608,10090.ENSMUSP00000110798,10090.ENSMUSP00000137374	Hapln2,Ndrg1,Cdk5,Fa2h,Dicer1,Adam22,Sh3tc2,Nab1,Mpp5,Erbb3,Arhgef10,Lama2,Nfasc,Slc5a3,Onecut2,Pou3f1
GO:0051649	establishment of localization in cell	123	1160	0.17	0.0019	2.72125	10090.ENSMUSP00000000384,10090.ENSMUSP00000001479,10090.ENSMUSP00000002063,10090.ENSMUSP00000002099,10090.ENSMUSP00000002603,10090.ENSMUSP00000003345,10090.ENSMUSP00000004683,10090.ENSMUSP00000005066,10090.ENSMUSP00000005406,10090.ENSMUSP00000006061,10090.ENSMUSP00000007803,10090.ENSMUSP00000010536,10090.ENSMUSP00000014920,10090.ENSMUSP00000018311,10090.ENSMUSP00000018625,10090.ENSMUSP00000018851…	Trappc10,Kpnb1,Ap4e1,Ift46,Scrib,Amph,Mcoln1,Map2k1,App,Pex1,Bcl2l1,Gosr1,Nol3,Stard3,Appbp2,Dync1h1,Nrbp2,Gnptab,Rab21,Kif3c,Rffl,Npc2,Zfyve16,Pmm1,Nde1,Slc11a2,Tbc1d5,Stard4,Bin1,Snx15,Map4k2,Als2,Stx6,Kif5c,Fam83d,Sec62,Leprot,Slc6a9,Atg4c,Cdk5,Prkcz,Uso1,Scarb2,Stx2,Sh3gl3,Arl6ip1,Pak1,Lamp1,Ddhd2,Heatr3,Fez1,Ldlr,Map4,Rab6b,Ipo13,Myo6,Ldlrap1,Fkbp1a,Myo1d,Stard3nl,Snx13,Fam21,Bicd2,Ap5z1,Cbl…
GO:0051962	positive regulation of nervous system development	64	503	0.25	0.0021	2.67778	10090.ENSMUSP00000000127,10090.ENSMUSP00000000724,10090.ENSMUSP00000003369,10090.ENSMUSP00000005066,10090.ENSMUSP00000005406,10090.ENSMUSP00000008878,10090.ENSMUSP00000014743,10090.ENSMUSP00000015435,10090.ENSMUSP00000019791,10090.ENSMUSP00000020343,10090.ENSMUSP00000020999,10090.ENSMUSP00000021119,10090.ENSMUSP00000021900,10090.ENSMUSP00000025239,10090.ENSMUSP00000027451,10090.ENSMUSP00000028836…	Wnt3,Kat2b,Plag1,Map2k1,App,Gprc5b,Csf1,Gdi1,Sema6a,Rab21,Kif3c,Aspa,Sema4d,Bin1,Epha4,Bmp2,Neurog2,Scarb2,Rasal1,Sh3gl3,Pak1,Sall1,Fez1,Tmem30a,Trf,Gdpd5,Mmd2,Shtn1,Sema7a,Dicer1,Ttbk1,Rims2,Picalm,Lpar1,Itsn2,Rnf112,Kctd11,Map6,Lingo2,Cxcl12,Cyb5d2,Golga4,Smurf1,Dlg5,Rap1a,Mfn1,Il1rap,Hspa5,Ptn,Nfe2l2,Ptprd,Rtn4,Tenm4,Ptk2,Eurl,Cdon,Cpeb3,Vldlr,Zfyve27,Enpp2,Prox1,Myrf,Mag,Tenm3
GO:0051128	regulation of cellular component organization	199	2084	0.13	0.0022	2.65758	10090.ENSMUSP00000000127,10090.ENSMUSP00000000153,10090.ENSMUSP00000000590,10090.ENSMUSP00000000641,10090.ENSMUSP00000000724,10090.ENSMUSP00000002099,10090.ENSMUSP00000004036,10090.ENSMUSP00000005066,10090.ENSMUSP00000005406,10090.ENSMUSP00000005749,10090.ENSMUSP00000006912,10090.ENSMUSP00000007803,10090.ENSMUSP00000008878,10090.ENSMUSP00000014920,10090.ENSMUSP00000015435,10090.ENSMUSP00000015858…	Wnt3,Gna12,Rdx,Sema4f,Kat2b,Ift46,Efnb3,Map2k1,App,Ctr9,Pip4k2a,Bcl2l1,Gprc5b,Nol3,Gdi1,Cers2,Celsr1,Sgk2,Dync1h1,Rab21,Kif3c,Itgb3,Xrcc3,Sema4d,Ctsl,Tppp,Sorbs3,Rb1,Arc,Cep97,Fgfr1op,Tbc1d5,Bin1,Atp8b1,Atl3,Arl2,Trip12,Epha4,Gsn,Zbtb7b,Stmn1,Padi2,Cdk5,Prkcz,Cdc7,Scarb2,Usp30,Rasal1,Adipor2,Dmpk,Sh3gl3,Pak1,Bag3,Ddhd2,Mtmr2,Jam3,Pvrl1,Cryab,Phldb1,Fez1,Ldlr,Kank2,Tmem30a,Map4,Trf,Shcbp1l,Dock5,L…
GO:0014037	Schwann cell differentiation	12	33	0.71	0.0024	2.61979	10090.ENSMUSP00000005256,10090.ENSMUSP00000030814,10090.ENSMUSP00000043597,10090.ENSMUSP00000043676,10090.ENSMUSP00000055000,10090.ENSMUSP00000055094,10090.ENSMUSP00000066696,10090.ENSMUSP00000080683,10090.ENSMUSP00000080716,10090.ENSMUSP00000081225,10090.ENSMUSP00000090304,10090.ENSMUSP00000137374	Ndrg1,Cdk5,Fa2h,Dicer1,Adam22,Sh3tc2,Nab1,Mpp5,Erbb3,Arhgef10,Lama2,Pou3f1
GO:0007417	central nervous system development	88	768	0.21	0.0024	2.61979	10090.ENSMUSP00000000127,10090.ENSMUSP00000002603,10090.ENSMUSP00000005014,10090.ENSMUSP00000005066,10090.ENSMUSP00000005406,10090.ENSMUSP00000006828,10090.ENSMUSP00000016172,10090.ENSMUSP00000021119,10090.ENSMUSP00000021921,10090.ENSMUSP00000023099,10090.ENSMUSP00000023352,10090.ENSMUSP00000023359,10090.ENSMUSP00000027451,10090.ENSMUSP00000028239,10090.ENSMUSP00000028763,10090.ENSMUSP00000028781…	Wnt3,Scrib,Hapln2,Map2k1,App,Aplp1,Celsr1,Aspa,Ptch1,Slc38a2,Prkdc,Nde1,Epha4,Gsn,Tyro3,Atrn,Bmp2,Tspan2,Neurog2,Slc2a1,Stmn1,Cdk5,Pak1,Bag3,Plp1,Sall1,Fez1,Spef2,Gdpd5,Myo1d,Foxj1,Rab3gap1,Sema7a,Rpgrip1l,Fa2h,Dicer1,Hdac11,Acsl3,Mbp,Kndc1,Mapk3,Daam2,Lpar1,Kcnj10,Kcna1,Atxn2,Phgdh,Aplp2,Sphk2,Cxcl12,Cdh11,Btbd3,Abl1,Tacc1,Cntn2,Dlg5,Atxn1l,Srgap2,Pgap1,Hspa5,Ptn,Aatk,Cnp,Stxbp3a,Rtn4,Unc5c,Tenm…
GO:0045666	positive regulation of neuron differentiation	49	353	0.29	0.0026	2.58503	10090.ENSMUSP00000000127,10090.ENSMUSP00000000724,10090.ENSMUSP00000005066,10090.ENSMUSP00000008878,10090.ENSMUSP00000015435,10090.ENSMUSP00000020343,10090.ENSMUSP00000020999,10090.ENSMUSP00000021900,10090.ENSMUSP00000027451,10090.ENSMUSP00000028836,10090.ENSMUSP00000029587,10090.ENSMUSP00000031377,10090.ENSMUSP00000031606,10090.ENSMUSP00000032874,10090.ENSMUSP00000033040,10090.ENSMUSP00000034090…	Wnt3,Kat2b,Map2k1,Gprc5b,Gdi1,Rab21,Kif3c,Sema4d,Epha4,Bmp2,Neurog2,Scarb2,Rasal1,Sh3gl3,Pak1,Sall1,Fez1,Tmem30a,Gdpd5,Mmd2,Shtn1,Sema7a,Rims2,Picalm,Lpar1,Itsn2,Rnf112,Kctd11,Map6,Cxcl12,Cyb5d2,Golga4,Smurf1,Dlg5,Rap1a,Mfn1,Il1rap,Hspa5,Ptn,Nfe2l2,Ptprd,Rtn4,Eurl,Cdon,Cpeb3,Vldlr,Zfyve27,Prox1,Tenm3
GO:0009653	anatomical structure morphogenesis	172	1764	0.14	0.003	2.52288	10090.ENSMUSP00000000127,10090.ENSMUSP00000000153,10090.ENSMUSP00000000641,10090.ENSMUSP00000002603,10090.ENSMUSP00000003369,10090.ENSMUSP00000004036,10090.ENSMUSP00000004968,10090.ENSMUSP00000005066,10090.ENSMUSP00000005164,10090.ENSMUSP00000005406,10090.ENSMUSP00000005749,10090.ENSMUSP00000007803,10090.ENSMUSP00000014743,10090.ENSMUSP00000016172,10090.ENSMUSP00000019791,10090.ENSMUSP00000020106…	Wnt3,Gna12,Sema4f,Scrib,Plag1,Efnb3,Plod3,Map2k1,Prkacb,App,Ctr9,Bcl2l1,Csf1,Celsr1,Sema6a,Arid5b,Itgb3,Sema4d,Ptch1,Ctsl,Ldb3,Plau,Lect1,Rb1,Prkdc,Slc11a2,Atp8b1,Smad7,Als2,Epha4,Kif5c,Tyro3,Bmp2,Angpt4,Car2,Neurog2,Pdgfc,Thbs3,Murc,Stmn1,Errfi1,Cdk5,Prkcz,Stx2,Cul1,Adipor2,Mgp,Pak1,Stim1,Atp6ap2,Sall1,Mtmr2,Jam3,Pvrl1,Cryab,Fez1,Myo1e,Plekha1,Ntng2,Spef2,Foxn3,Myo6,Ninj1,Fkbp1a,Foxj1,Thsd7a,Sht…
GO:0065008	regulation of biological quality	265	2939	0.1	0.0035	2.45593	10090.ENSMUSP00000000127,10090.ENSMUSP00000000153,10090.ENSMUSP00000000590,10090.ENSMUSP00000000641,10090.ENSMUSP00000000724,10090.ENSMUSP00000001592,10090.ENSMUSP00000002099,10090.ENSMUSP00000002572,10090.ENSMUSP00000002603,10090.ENSMUSP00000004137,10090.ENSMUSP00000004172,10090.ENSMUSP00000004683,10090.ENSMUSP00000004968,10090.ENSMUSP00000005066,10090.ENSMUSP00000005406,10090.ENSMUSP00000007803…	Wnt3,Gna12,Rdx,Sema4f,Kat2b,Jup,Ift46,Slc9a3r2,Scrib,Gstm7,Hmox2,Mcoln1,Plod3,Map2k1,App,Bcl2l1,Carhsp1,Gprc5b,Csf1,Nol3,Gdi1,Ctsk,Celsr1,Mpp2,Stard3,Pdk4,Rab21,Itgb3,Npc2,Xrcc3,Sema4d,Ptch1,Hmgcr,Plau,Txndc16,Rb1,Arc,Prkdc,Slc11a2,Enpp4,Tmem178,Stard4,Bin1,Npc1,Gabbr1,Atp8b1,Fech,Fth1,Arl2,Alox5,Smad7,Als2,Cyp27a1,Epha4,Gsn,Tyro3,Bmp2,Car2,Anxa5,Hadh,Pdgfc,Zbtb7b,Gclm,Slc6a9,Stmn1,Cdk5,Prkcz,Tme…
GO:0050793	regulation of developmental process	199	2106	0.12	0.0037	2.4318	10090.ENSMUSP00000000127,10090.ENSMUSP00000000153,10090.ENSMUSP00000000590,10090.ENSMUSP00000000641,10090.ENSMUSP00000000724,10090.ENSMUSP00000001592,10090.ENSMUSP00000003369,10090.ENSMUSP00000004036,10090.ENSMUSP00000005066,10090.ENSMUSP00000005164,10090.ENSMUSP00000005406,10090.ENSMUSP00000005749,10090.ENSMUSP00000008878,10090.ENSMUSP00000014691,10090.ENSMUSP00000014743,10090.ENSMUSP00000015435…	Wnt3,Gna12,Rdx,Sema4f,Kat2b,Jup,Plag1,Efnb3,Map2k1,Prkacb,App,Ctr9,Gprc5b,Wdfy2,Csf1,Gdi1,Cers2,Celsr1,Tmbim1,Nkap,Sema6a,Rab21,Kif3c,Itgb3,Aspa,Sema4d,Ptch1,Hmgcr,Plau,Lect1,Bmp1,Rb1,Ank,Arc,Prkdc,Tmem178,Bin1,Il23a,Smad7,Trip12,Epha4,Slc45a3,Grb14,Atrn,Bmp2,Angpt4,Car2,Neurog2,Zbtb7b,Errfi1,Cdk5,Prkcz,Cdc7,Scarb2,Rasal1,Mgp,Dmpk,Sh3gl3,Pak1,Stim1,Morf4l2,Ddhd2,Nkd1,Sall1,Mtmr2,Pvrl1,Phldb1,Fez1…
GO:0006650	glycerophospholipid metabolic process	30	177	0.38	0.0039	2.40894	10090.ENSMUSP00000006912,10090.ENSMUSP00000024594,10090.ENSMUSP00000026129,10090.ENSMUSP00000026823,10090.ENSMUSP00000031081,10090.ENSMUSP00000031273,10090.ENSMUSP00000032413,10090.ENSMUSP00000033754,10090.ENSMUSP00000034396,10090.ENSMUSP00000044280,10090.ENSMUSP00000045351,10090.ENSMUSP00000045910,10090.ENSMUSP00000046625,10090.ENSMUSP00000052838,10090.ENSMUSP00000054458,10090.ENSMUSP00000064334…	Pip4k2a,Agpat4,Pcyt2,Pigq,Pi4k2b,Cds1,Etnk1,Piga,Mtmr2,Pcyt1b,Pigk,Inpp5f,Inpp5j,Pigm,Napepld,Far1,Cept1,Prdx6,Synj2,Pgap1,Mtm1,Cds2,Plch2,Pigc,Inpp4a,Etnk2,Ept1,Tmem55b,Enpp2,Pign
GO:0007265	Ras protein signal transduction	23	117	0.44	0.004	2.39794	10090.ENSMUSP00000000153,10090.ENSMUSP00000001479,10090.ENSMUSP00000015435,10090.ENSMUSP00000016172,10090.ENSMUSP00000022701,10090.ENSMUSP00000027178,10090.ENSMUSP00000030033,10090.ENSMUSP00000033040,10090.ENSMUSP00000038063,10090.ENSMUSP00000038915,10090.ENSMUSP00000041378,10090.ENSMUSP00000047285,10090.ENSMUSP00000056433,10090.ENSMUSP00000059883,10090.ENSMUSP00000065571,10090.ENSMUSP00000088174…	Gna12,Kpnb1,Gdi1,Celsr1,Rb1,Als2,Murc,Pak1,Dhcr24,Rhou,Shtn1,Pak7,Rap2a,Cdc42ep2,Rtkn,Rap1a,Psd3,Rhog,Aatk,Phactr4,Ralgapb,Arhgef12,Myo9b
GO:0090407	organophosphate biosynthetic process	49	361	0.28	0.004	2.39794	10090.ENSMUSP00000002603,10090.ENSMUSP00000006692,10090.ENSMUSP00000021424,10090.ENSMUSP00000021817,10090.ENSMUSP00000021920,10090.ENSMUSP00000022292,10090.ENSMUSP00000022529,10090.ENSMUSP00000024594,10090.ENSMUSP00000026129,10090.ENSMUSP00000026823,10090.ENSMUSP00000029135,10090.ENSMUSP00000029564,10090.ENSMUSP00000030381,10090.ENSMUSP00000031273,10090.ENSMUSP00000032413,10090.ENSMUSP00000033754…	Scrib,Mvd,Sptlc2,Ippk,Sptlc1,Samd8,Tkt,Agpat4,Pcyt2,Pigq,Acss2,Pmvk,Ctps,Cds1,Etnk1,Piga,Acsl1,Mvk,Pcyt1b,Pigk,Mboat1,Bpgm,Gucy1a3,Pigm,Dlg1,Far1,Cept1,Sphk2,Acot7,Fdps,Mpp5,Pgap1,Cds2,Acaca,Dlg2,Acly,Fitm2,Lpgat1,Pigc,Ppip5k2,Adcy5,Inpp4a,Gk5,Etnk2,Pfkp,Ept1,Idi1,Adssl1,Pign
GO:0019637	organophosphate metabolic process	81	703	0.21	0.004	2.39794	10090.ENSMUSP00000002603,10090.ENSMUSP00000006692,10090.ENSMUSP00000006912,10090.ENSMUSP00000020217,10090.ENSMUSP00000021424,10090.ENSMUSP00000021817,10090.ENSMUSP00000021920,10090.ENSMUSP00000022176,10090.ENSMUSP00000022292,10090.ENSMUSP00000022529,10090.ENSMUSP00000023559,10090.ENSMUSP00000023760,10090.ENSMUSP00000024594,10090.ENSMUSP00000026129,10090.ENSMUSP00000026672,10090.ENSMUSP00000026823…	Scrib,Mvd,Pip4k2a,Nudt4,Sptlc2,Ippk,Sptlc1,Hmgcr,Samd8,Tkt,Ehhadh,Gpd1,Agpat4,Pcyt2,Pde8a,Pigq,Kif5c,Acss2,Pmvk,Ctps,Pi4k2b,Cds1,Etnk1,Piga,Acsl1,Mtmr2,Mvk,Pcyt1b,Pigk,Mboat1,Inpp5f,Itpk1,Gde1,Inpp5j,Bpgm,Gucy1a3,Pigm,Fasn,Napepld,Fdft1,Dlg1,Far1,Cept1,Ppap2c,Pla2g4a,Prdx6,Entpd5,Sphk2,Nudt7,Acot7,Cacnb4,Synj2,Fdps,Myh6,Mpp5,Mfn1,Pgap1,Mtm1,Cnp,Cds2,Acaca,Ugp2,Plch2,Dlg2,Acly,Fitm2,Lpgat1,Pigc,Gp…
GO:2000026	regulation of multicellular organismal development	161	1644	0.14	0.0041	2.38722	10090.ENSMUSP00000000127,10090.ENSMUSP00000000641,10090.ENSMUSP00000000724,10090.ENSMUSP00000001592,10090.ENSMUSP00000003369,10090.ENSMUSP00000004036,10090.ENSMUSP00000005066,10090.ENSMUSP00000005164,10090.ENSMUSP00000005406,10090.ENSMUSP00000005749,10090.ENSMUSP00000008878,10090.ENSMUSP00000014743,10090.ENSMUSP00000015435,10090.ENSMUSP00000015858,10090.ENSMUSP00000016172,10090.ENSMUSP00000016553…	Wnt3,Sema4f,Kat2b,Jup,Plag1,Efnb3,Map2k1,Prkacb,App,Ctr9,Gprc5b,Csf1,Gdi1,Cers2,Celsr1,Nkap,Sema6a,Rab21,Kif3c,Itgb3,Aspa,Sema4d,Ptch1,Hmgcr,Plau,Lect1,Bmp1,Rb1,Ank,Arc,Tmem178,Bin1,Il23a,Smad7,Trip12,Epha4,Slc45a3,Bmp2,Angpt4,Car2,Neurog2,Zbtb7b,Errfi1,Cdk5,Prkcz,Scarb2,Rasal1,Mgp,Sh3gl3,Pak1,Stim1,Nkd1,Sall1,Mtmr2,Pvrl1,Phldb1,Fez1,Ldlr,Tmem30a,Trf,Gdpd5,Lzts3,Bmp2k,Foxj1,Jcad,Mmd2,Cyld,Shtn1,R…
GO:0048667	cell morphogenesis involved in neuron differentiation	46	332	0.29	0.0042	2.37675	10090.ENSMUSP00000000127,10090.ENSMUSP00000000641,10090.ENSMUSP00000002603,10090.ENSMUSP00000004036,10090.ENSMUSP00000005406,10090.ENSMUSP00000019791,10090.ENSMUSP00000021921,10090.ENSMUSP00000022701,10090.ENSMUSP00000023774,10090.ENSMUSP00000027178,10090.ENSMUSP00000027451,10090.ENSMUSP00000028102,10090.ENSMUSP00000029587,10090.ENSMUSP00000030636,10090.ENSMUSP00000030814,10090.ENSMUSP00000034510…	Wnt3,Sema4f,Scrib,Efnb3,App,Sema6a,Ptch1,Rb1,Slc11a2,Als2,Epha4,Kif5c,Neurog2,Stmn1,Cdk5,Pvrl1,Fez1,Ntng2,Shtn1,Sema7a,Picalm,Map6,Tubb3,Mink1,Cxcl12,Cdh11,Btbd3,Abl1,Unc5b,Dock10,Apc,Cntn2,Ank3,Lama2,Nfasc,Dst,Kif5a,Cnp,Unc5c,Ptk2,Klf7,Fgfr2,Dact1,Apbb2,Vldlr,Auts2
GO:0046467	membrane lipid biosynthetic process	20	94	0.47	0.0046	2.33724	10090.ENSMUSP00000006557,10090.ENSMUSP00000015858,10090.ENSMUSP00000021424,10090.ENSMUSP00000021920,10090.ENSMUSP00000022207,10090.ENSMUSP00000022292,10090.ENSMUSP00000025477,10090.ENSMUSP00000026823,10090.ENSMUSP00000033754,10090.ENSMUSP00000034537,10090.ENSMUSP00000045351,10090.ENSMUSP00000048519,10090.ENSMUSP00000050852,10090.ENSMUSP00000052838,10090.ENSMUSP00000060462,10090.ENSMUSP00000071351…	Elovl1,Cers2,Sptlc2,Sptlc1,Elovl7,Samd8,St8sia3,Pigq,Piga,St3gal4,Pigk,Degs1,Ugt8a,Pigm,Ptplb,Elovl6,Sphk2,Pgap1,Pigc,Pign
GO:0000904	cell morphogenesis involved in differentiation	56	437	0.25	0.0047	2.3279	10090.ENSMUSP00000000127,10090.ENSMUSP00000000641,10090.ENSMUSP00000002603,10090.ENSMUSP00000004036,10090.ENSMUSP00000004968,10090.ENSMUSP00000005406,10090.ENSMUSP00000019791,10090.ENSMUSP00000021028,10090.ENSMUSP00000021921,10090.ENSMUSP00000022603,10090.ENSMUSP00000022701,10090.ENSMUSP00000023774,10090.ENSMUSP00000027178,10090.ENSMUSP00000027451,10090.ENSMUSP00000028102,10090.ENSMUSP00000028763…	Wnt3,Sema4f,Scrib,Efnb3,Plod3,App,Sema6a,Itgb3,Ptch1,Lect1,Rb1,Slc11a2,Als2,Epha4,Kif5c,Tyro3,Neurog2,Stmn1,Cdk5,Pvrl1,Fez1,Ntng2,Shtn1,Clic4,Sema7a,Picalm,Map6,Tubb3,Mink1,Cxcl12,Cdh11,Btbd3,Abl1,Unc5b,Dock10,Apc,Cntn2,Ank3,Lama2,Nfasc,Srgap2,Dst,Kif5a,Cnp,Unc5c,Srcin1,Ptk2,Klf7,Fgfr2,Dact1,Heg1,Apbb2,Vldlr,Nbeal2,Prox1,Auts2
GO:0032879	regulation of localization	206	2210	0.12	0.005	2.30103	10090.ENSMUSP00000000127,10090.ENSMUSP00000000153,10090.ENSMUSP00000000590,10090.ENSMUSP00000001592,10090.ENSMUSP00000003436,10090.ENSMUSP00000004137,10090.ENSMUSP00000004683,10090.ENSMUSP00000004715,10090.ENSMUSP00000005066,10090.ENSMUSP00000005406,10090.ENSMUSP00000007005,10090.ENSMUSP00000007803,10090.ENSMUSP00000010536,10090.ENSMUSP00000013842,10090.ENSMUSP00000014743,10090.ENSMUSP00000014920…	Wnt3,Gna12,Rdx,Jup,Abhd17a,Gstm7,Mcoln1,Mospd2,Map2k1,App,Acat2,Bcl2l1,Gosr1,Pea15a,Csf1,Nol3,Cnksr3,Gdi1,Cers2,Celsr1,Tmbim1,Sgk2,Dync1h1,Sema6a,Rab21,Itgb3,Rffl,Sema4d,Ptch1,Hmgcr,Plau,Spata13,Rb1,Arc,Fgfr1op,Tbc1d5,Bin1,Gabbr1,Il23a,Stx6,Gsn,Bmp2,Angpt4,Car2,Anxa5,Hadh,Pdgfc,Leprot,Stmn1,Padi2,Cdk5,Prkcz,Aacs,Adipor2,Dmpk,Sh3gl3,Arl6ip1,Pak1,Bag3,Stim1,Lamp1,Mtmr2,Jam3,Cryab,Fez1,Ldlr,Tmem30a,…
GO:0010975	regulation of neuron projection development	58	461	0.25	0.0053	2.27572	10090.ENSMUSP00000000127,10090.ENSMUSP00000000641,10090.ENSMUSP00000000724,10090.ENSMUSP00000004036,10090.ENSMUSP00000005066,10090.ENSMUSP00000008878,10090.ENSMUSP00000015435,10090.ENSMUSP00000015858,10090.ENSMUSP00000020343,10090.ENSMUSP00000020999,10090.ENSMUSP00000021900,10090.ENSMUSP00000023268,10090.ENSMUSP00000027451,10090.ENSMUSP00000030814,10090.ENSMUSP00000031377,10090.ENSMUSP00000031606…	Wnt3,Sema4f,Kat2b,Efnb3,Map2k1,Gprc5b,Gdi1,Cers2,Rab21,Kif3c,Sema4d,Arc,Epha4,Cdk5,Scarb2,Rasal1,Pak1,Fez1,Tmem30a,Lzts3,Shtn1,Sema7a,Ssh2,Inpp5f,Inpp5j,Rims2,Kndc1,Picalm,Lpar1,Itsn2,Rap2a,Map6,Cxcl12,Abl1,Golga4,Smurf1,Cntn2,Dlg5,Rap1a,Mfn1,Il1rap,Hspa5,Ptn,Aatk,Nfe2l2,Rapgef4,Ptprd,Rtn4,Srcin1,Ptk2,Mgll,Eurl,Spg20,Cpeb3,Vldlr,Zfyve27,Mag,Tenm3
GO:0030182	neuron differentiation	92	836	0.19	0.0053	2.27572	10090.ENSMUSP00000000127,10090.ENSMUSP00000000641,10090.ENSMUSP00000002603,10090.ENSMUSP00000004036,10090.ENSMUSP00000005066,10090.ENSMUSP00000005406,10090.ENSMUSP00000019516,10090.ENSMUSP00000019791,10090.ENSMUSP00000020991,10090.ENSMUSP00000021921,10090.ENSMUSP00000022701,10090.ENSMUSP00000023774,10090.ENSMUSP00000025482,10090.ENSMUSP00000027178,10090.ENSMUSP00000027451,10090.ENSMUSP00000027472…	Wnt3,Sema4f,Scrib,Efnb3,Map2k1,App,Nrbp2,Sema6a,Dnmt3a,Ptch1,Rb1,Slc11a2,Atp8b1,Als2,Epha4,Efhd1,Kif5c,Tspan2,Neurog2,Stmn1,Cdk5,Prkcz,Pak1,Plp1,Sall1,Mtmr2,Jam3,Pvrl1,Fez1,Map4,Ntng2,Gdpd5,Myo6,Git1,Shtn1,Micall1,Sema7a,Dicer1,Ctnna1,Kndc1,Ugt8a,Picalm,Rnf112,Atxn2,Phgdh,Map6,Tubb3,Mink1,Cxcl12,Stmn4,Cdh11,Btbd3,Abl1,Unc5b,Dock10,Apc,Cntn2,Ank3,Lama2,Nfasc,Srgap2,Dst,Kif5a,Hspa5,Ptn,Cnp,Ptprd,Rt…
GO:0022603	regulation of anatomical structure morphogenesis	94	866	0.18	0.0068	2.16749	10090.ENSMUSP00000000127,10090.ENSMUSP00000000153,10090.ENSMUSP00000000590,10090.ENSMUSP00000000641,10090.ENSMUSP00000001592,10090.ENSMUSP00000004036,10090.ENSMUSP00000005066,10090.ENSMUSP00000014743,10090.ENSMUSP00000015435,10090.ENSMUSP00000016172,10090.ENSMUSP00000016309,10090.ENSMUSP00000019791,10090.ENSMUSP00000020343,10090.ENSMUSP00000021028,10090.ENSMUSP00000021900,10090.ENSMUSP00000022368…	Wnt3,Gna12,Rdx,Sema4f,Jup,Efnb3,Map2k1,Csf1,Gdi1,Celsr1,Tmbim1,Sema6a,Rab21,Itgb3,Sema4d,Plau,Lect1,Arc,Epha4,Bmp2,Angpt4,Cdk5,Cdc7,Rasal1,Pak1,Stim1,Ddhd2,Nkd1,Sall1,Phldb1,Dock5,Lzts3,Foxj1,Jcad,Rhou,Shtn1,Rras,Sema7a,Ssh2,Dicer1,Ttbk1,Fgf1,Mbp,Cd59a,Rims2,Kndc1,Picalm,Lpar1,Itsn2,Rap2a,Cdc42ep2,Dlg1,Map6,Actn4,Rhob,Lrrc16a,Cxcl12,Sema3e,Abl1,Hhip,Apc,Golga4,Smurf1,Cntn2,Rap1a,Ermn,Mfn1,Inf2,Pt…
GO:0046907	intracellular transport	102	960	0.17	0.0071	2.14874	10090.ENSMUSP00000000384,10090.ENSMUSP00000001479,10090.ENSMUSP00000002063,10090.ENSMUSP00000002099,10090.ENSMUSP00000002603,10090.ENSMUSP00000004683,10090.ENSMUSP00000005066,10090.ENSMUSP00000005406,10090.ENSMUSP00000006061,10090.ENSMUSP00000007803,10090.ENSMUSP00000010536,10090.ENSMUSP00000018625,10090.ENSMUSP00000018851,10090.ENSMUSP00000019516,10090.ENSMUSP00000020251,10090.ENSMUSP00000020343…	Trappc10,Kpnb1,Ap4e1,Ift46,Scrib,Mcoln1,Map2k1,App,Pex1,Bcl2l1,Gosr1,Appbp2,Dync1h1,Nrbp2,Gnptab,Rab21,Kif3c,Rffl,Npc2,Zfyve16,Pmm1,Nde1,Tbc1d5,Stard4,Bin1,Snx15,Als2,Stx6,Kif5c,Sec62,Leprot,Atg4c,Cdk5,Prkcz,Uso1,Scarb2,Stx2,Arl6ip1,Lamp1,Ddhd2,Heatr3,Ldlr,Rab6b,Ipo13,Myo6,Ldlrap1,Myo1d,Snx13,Fam21,Bicd2,Ap5z1,Cbl,Micall1,Rab3gap1,Usp6nl,Rftn1,Ick,Coro7,Rims2,Picalm,Tmed2,Sorl1,Snx33,Kif1b,Map6,S…
GO:0010769	regulation of cell morphogenesis involved in differentiation	38	263	0.31	0.0077	2.11351	10090.ENSMUSP00000000127,10090.ENSMUSP00000000641,10090.ENSMUSP00000004036,10090.ENSMUSP00000005066,10090.ENSMUSP00000015435,10090.ENSMUSP00000020343,10090.ENSMUSP00000021028,10090.ENSMUSP00000021900,10090.ENSMUSP00000023268,10090.ENSMUSP00000027451,10090.ENSMUSP00000030814,10090.ENSMUSP00000033040,10090.ENSMUSP00000036674,10090.ENSMUSP00000037109,10090.ENSMUSP00000041378,10090.ENSMUSP00000042211…	Wnt3,Sema4f,Efnb3,Map2k1,Gdi1,Rab21,Itgb3,Sema4d,Arc,Epha4,Cdk5,Pak1,Dock5,Lzts3,Shtn1,Sema7a,Ssh2,Kndc1,Picalm,Rap2a,Map6,Actn4,Lrrc16a,Cxcl12,Abl1,Golga4,Cntn2,Mfn1,Aatk,Ptprd,Rtn4,Srcin1,Ptk2,Mgll,Spg20,Zfyve27,Enpp2,Mag
GO:0048638	regulation of developmental growth	43	315	0.28	0.0088	2.05552	10090.ENSMUSP00000000127,10090.ENSMUSP00000000641,10090.ENSMUSP00000005406,10090.ENSMUSP00000014743,10090.ENSMUSP00000015435,10090.ENSMUSP00000020343,10090.ENSMUSP00000021900,10090.ENSMUSP00000021921,10090.ENSMUSP00000023352,10090.ENSMUSP00000028781,10090.ENSMUSP00000030814,10090.ENSMUSP00000031606,10090.ENSMUSP00000033040,10090.ENSMUSP00000034086,10090.ENSMUSP00000041378,10090.ENSMUSP00000042211…	Wnt3,Sema4f,App,Csf1,Gdi1,Rab21,Sema4d,Ptch1,Prkdc,Atrn,Cdk5,Rasal1,Pak1,Nkd1,Shtn1,Sema7a,Rims2,Picalm,Itsn2,Atxn2,Dlg1,Cxcl12,Abl1,Apc,Fdps,Myh6,Golga4,Mfsd7b,Smurf1,Mtm1,Aatk,Rtn4,Gamt,Ptk2,Bcl2l11,Mgll,Fgfr2,Spg20,Stat3,Zfyve27,Prox1,Meis1,Mag
GO:0014013	regulation of gliogenesis	22	117	0.42	0.0089	2.05061	10090.ENSMUSP00000003369,10090.ENSMUSP00000005406,10090.ENSMUSP00000014743,10090.ENSMUSP00000015858,10090.ENSMUSP00000021119,10090.ENSMUSP00000025239,10090.ENSMUSP00000027451,10090.ENSMUSP00000027695,10090.ENSMUSP00000028836,10090.ENSMUSP00000034713,10090.ENSMUSP00000035158,10090.ENSMUSP00000043676,10090.ENSMUSP00000044580,10090.ENSMUSP00000052085,10090.ENSMUSP00000056464,10090.ENSMUSP00000083707…	Plag1,App,Csf1,Cers2,Aspa,Bin1,Epha4,Slc45a3,Bmp2,Ldlr,Trf,Dicer1,Ttbk1,Daam2,Rnf112,Cntn2,Ptn,Rtn4,Tenm4,Ptk2,Enpp2,Mag
GO:0007017	microtubule-based process	66	560	0.22	0.0093	2.03152	10090.ENSMUSP00000001479,10090.ENSMUSP00000002099,10090.ENSMUSP00000004156,10090.ENSMUSP00000005066,10090.ENSMUSP00000005406,10090.ENSMUSP00000006061,10090.ENSMUSP00000014990,10090.ENSMUSP00000018851,10090.ENSMUSP00000020343,10090.ENSMUSP00000020999,10090.ENSMUSP00000022057,10090.ENSMUSP00000023359,10090.ENSMUSP00000024636,10090.ENSMUSP00000025893,10090.ENSMUSP00000028102,10090.ENSMUSP00000029571…	Kpnb1,Ift46,Map3k11,Map2k1,App,Pex1,Tppp3,Dync1h1,Rab21,Kif3c,Tppp,Nde1,Fgfr1op,Arl2,Kif5c,Sass6,Stmn1,Prkcz,Cryab,Myo1e,Map4,Spef2,Myo6,Cep72,Myo1d,Trim36,Bicd2,AK129341,Dicer1,Slc16a1,Dync1li2,Ick,Ttll5,Slk,Ccdc187,Map7d1,Kif1b,Dlg1,Map6,Cenpj,Tubb3,Stmn4,Plk3,Apc,Myh6,Tacc1,Arhgef10,Cntn2,Kif21a,Map1a,Srgap2,Dst,Kif5a,Tbc1d32,Cnp,Ccp110,Dlg2,Kif24,Eml1,Ptk2,Cdc42bpa,Kif1a,Map7,Ccdc13,Myo9b,Myo…
GO:0051056	regulation of small GTPase mediated signal transduction	32	210	0.33	0.0108	1.96658	10090.ENSMUSP00000005066,10090.ENSMUSP00000014743,10090.ENSMUSP00000017276,10090.ENSMUSP00000020208,10090.ENSMUSP00000022566,10090.ENSMUSP00000027178,10090.ENSMUSP00000030033,10090.ENSMUSP00000030636,10090.ENSMUSP00000031606,10090.ENSMUSP00000032924,10090.ENSMUSP00000037210,10090.ENSMUSP00000039357,10090.ENSMUSP00000042070,10090.ENSMUSP00000042327,10090.ENSMUSP00000043390,10090.ENSMUSP00000052581…	Map2k1,Csf1,Cyth1,Fgd6,Spata13,Als2,Murc,Stmn1,Rasal1,Kctd13,Git1,Mmd2,Rab3gap1,Lpar6,Icmt,Lpar1,Itsn2,Plekhg3,Abl1,Notch2,Arhgef10,Psd3,Arhgef1,Arfgef2,Ralgapb,Fgd3,Cdc42bpa,Cdon,Arhgef12,Myo9b,Arhgef37,Auts2
GO:0006633	fatty acid biosynthetic process	17	78	0.49	0.0109	1.96257	10090.ENSMUSP00000006557,10090.ENSMUSP00000022207,10090.ENSMUSP00000026221,10090.ENSMUSP00000029135,10090.ENSMUSP00000033800,10090.ENSMUSP00000036936,10090.ENSMUSP00000043597,10090.ENSMUSP00000045291,10090.ENSMUSP00000048519,10090.ENSMUSP00000052872,10090.ENSMUSP00000058783,10090.ENSMUSP00000060462,10090.ENSMUSP00000071351,10090.ENSMUSP00000074827,10090.ENSMUSP00000099490,10090.ENSMUSP00000103012…	Elovl1,Elovl7,Scd2,Acss2,Plp1,Scd1,Fa2h,Acsl3,Degs1,Fasn,Fads6,Ptplb,Elovl6,Acot7,Acaca,Acly,Mgll
GO:0097435	supramolecular fiber organization	45	342	0.27	0.0125	1.90309	10090.ENSMUSP00000001479,10090.ENSMUSP00000004968,10090.ENSMUSP00000005406,10090.ENSMUSP00000014990,10090.ENSMUSP00000018851,10090.ENSMUSP00000022057,10090.ENSMUSP00000022327,10090.ENSMUSP00000022682,10090.ENSMUSP00000023359,10090.ENSMUSP00000028239,10090.ENSMUSP00000030033,10090.ENSMUSP00000030636,10090.ENSMUSP00000032924,10090.ENSMUSP00000035158,10090.ENSMUSP00000037206,10090.ENSMUSP00000040171…	Kpnb1,Plod3,App,Tppp3,Dync1h1,Tppp,Ldb3,Sorbs3,Nde1,Gsn,Murc,Stmn1,Kctd13,Trf,Fkbp1a,Adamts2,Shtn1,AK129341,Coro7,Ctnna1,Slk,Lmod1,Dlg1,Cenpj,Actn4,Lrrc16a,Stmn4,Abl1,Plk3,Mical3,Apc,Myh6,Arpc1b,Ermn,Dst,Tmod2,Thsd4,Mtm1,Tmod1,Kif24,Gas7,Add1,Ccdc13,Lcp1,Prox1
GO:0046578	regulation of Ras protein signal transduction	29	184	0.34	0.0126	1.89963	10090.ENSMUSP00000005066,10090.ENSMUSP00000014743,10090.ENSMUSP00000017276,10090.ENSMUSP00000020208,10090.ENSMUSP00000022566,10090.ENSMUSP00000027178,10090.ENSMUSP00000030033,10090.ENSMUSP00000030636,10090.ENSMUSP00000031606,10090.ENSMUSP00000032924,10090.ENSMUSP00000037210,10090.ENSMUSP00000039357,10090.ENSMUSP00000042070,10090.ENSMUSP00000042327,10090.ENSMUSP00000043390,10090.ENSMUSP00000052581…	Map2k1,Csf1,Cyth1,Fgd6,Spata13,Als2,Murc,Stmn1,Rasal1,Kctd13,Git1,Mmd2,Rab3gap1,Lpar6,Icmt,Lpar1,Itsn2,Plekhg3,Abl1,Notch2,Arhgef10,Psd3,Arhgef1,Arfgef2,Fgd3,Arhgef12,Myo9b,Arhgef37,Auts2
GO:0022010	central nervous system myelination	8	18	0.79	0.0132	1.87943	10090.ENSMUSP00000021119,10090.ENSMUSP00000033800,10090.ENSMUSP00000043597,10090.ENSMUSP00000054356,10090.ENSMUSP00000083707,10090.ENSMUSP00000102783,10090.ENSMUSP00000139601,10090.ENSMUSP00000139881	Aspa,Plp1,Fa2h,Kcnj10,Cntn2,Tenm4,Myrf,Mag
GO:0034329	cell junction assembly	19	96	0.44	0.0132	1.87943	10090.ENSMUSP00000001592,10090.ENSMUSP00000018315,10090.ENSMUSP00000021028,10090.ENSMUSP00000025893,10090.ENSMUSP00000026999,10090.ENSMUSP00000041009,10090.ENSMUSP00000049007,10090.ENSMUSP00000050852,10090.ENSMUSP00000064280,10090.ENSMUSP00000066068,10090.ENSMUSP00000075772,10090.ENSMUSP00000080683,10090.ENSMUSP00000087879,10090.ENSMUSP00000092148,10090.ENSMUSP00000099815,10090.ENSMUSP00000102068…	Jup,Vmp1,Itgb3,Arl2,Smad7,Tesk2,Ctnna1,Ugt8a,Dlg1,Actn4,Plec,Mpp5,Dlg5,Nfasc,Pkp4,Itgb4,Pdcd6ip,Epb4.1l3,Heg1
GO:0051640	organelle localization	49	385	0.25	0.0132	1.87943	10090.ENSMUSP00000001479,10090.ENSMUSP00000002603,10090.ENSMUSP00000005066,10090.ENSMUSP00000006061,10090.ENSMUSP00000007803,10090.ENSMUSP00000018311,10090.ENSMUSP00000018851,10090.ENSMUSP00000019791,10090.ENSMUSP00000020999,10090.ENSMUSP00000023359,10090.ENSMUSP00000025239,10090.ENSMUSP00000025897,10090.ENSMUSP00000027743,10090.ENSMUSP00000029183,10090.ENSMUSP00000030814,10090.ENSMUSP00000030922…	Kpnb1,Scrib,Map2k1,Pex1,Bcl2l1,Stard3,Dync1h1,Sema6a,Kif3c,Nde1,Bin1,Map4k2,Stx6,Fam83d,Cdk5,Prkcz,Uso1,Stx2,Fez1,Map4,Stard3nl,Bicd2,Cbl,Rab3gap1,Dync1li2,Rims2,Kif1b,Dlg1,Map6,Sytl5,Actn4,Mobp,Synj2,Tacc1,Stx16,Mfn1,Exoc8,Mtm1,Wipi1,Stxbp3a,Sytl2,Syt11,Ptk2,Cdc42bpa,Klhl12,Kif1a,Fgfr2,Exoc6b,Stxbp2
GO:0065007	biological regulation	678	8648	0.04	0.0132	1.87943	10090.ENSMUSP00000000080,10090.ENSMUSP00000000127,10090.ENSMUSP00000000153,10090.ENSMUSP00000000590,10090.ENSMUSP00000000641,10090.ENSMUSP00000000724,10090.ENSMUSP00000000808,10090.ENSMUSP00000001479,10090.ENSMUSP00000001583,10090.ENSMUSP00000001592,10090.ENSMUSP00000002081,10090.ENSMUSP00000002099,10090.ENSMUSP00000002572,10090.ENSMUSP00000002603,10090.ENSMUSP00000002889,10090.ENSMUSP00000003369…	Klf6,Wnt3,Gna12,Rdx,Sema4f,Kat2b,Il12rb1,Kpnb1,Ell2,Jup,Srpk3,Ift46,Slc9a3r2,Scrib,Flii,Plag1,Abhd17a,Dusp3,Efnb3,Gstm7,Map3k11,Hmox2,Cdip1,Mcoln1,Mospd2,Plod3,Map2k1,Prkacb,Cstb,Ndrg1,App,Ctr9,Mvd,Itih3,Aplp1,Pip4k2a,Acat2,Bcl2l1,Carhsp1,Gprc5b,Gosr1,Adam19,Pea15a,Wdfy2,Csf1,Nol3,Cnksr3,Gdi1,Ctsk,Cers2,Rrbp1,Celsr1,Tmbim1,Nkap,Cyth1,Casc3,Mpp2,Rab11fip4,Sgk2,Stard3,Dync1h1,Nrbp2,Pdk4,Sema6a,Ube2…
GO:0007409	axonogenesis	37	263	0.3	0.0133	1.87615	10090.ENSMUSP00000000127,10090.ENSMUSP00000000641,10090.ENSMUSP00000004036,10090.ENSMUSP00000005406,10090.ENSMUSP00000019791,10090.ENSMUSP00000021921,10090.ENSMUSP00000027178,10090.ENSMUSP00000027451,10090.ENSMUSP00000028102,10090.ENSMUSP00000029587,10090.ENSMUSP00000030636,10090.ENSMUSP00000030814,10090.ENSMUSP00000034510,10090.ENSMUSP00000034630,10090.ENSMUSP00000035468,10090.ENSMUSP00000041378…	Wnt3,Sema4f,Efnb3,App,Sema6a,Ptch1,Als2,Epha4,Kif5c,Neurog2,Stmn1,Cdk5,Pvrl1,Fez1,Ntng2,Shtn1,Sema7a,Picalm,Tubb3,Cxcl12,Cdh11,Abl1,Unc5b,Apc,Cntn2,Ank3,Lama2,Nfasc,Dst,Kif5a,Cnp,Unc5c,Ptk2,Klf7,Fgfr2,Apbb2,Auts2
GO:0050770	regulation of axonogenesis	26	158	0.36	0.0137	1.86328	10090.ENSMUSP00000000127,10090.ENSMUSP00000000641,10090.ENSMUSP00000004036,10090.ENSMUSP00000005066,10090.ENSMUSP00000015435,10090.ENSMUSP00000020343,10090.ENSMUSP00000021900,10090.ENSMUSP00000027451,10090.ENSMUSP00000030814,10090.ENSMUSP00000033040,10090.ENSMUSP00000041378,10090.ENSMUSP00000042211,10090.ENSMUSP00000042625,10090.ENSMUSP00000051092,10090.ENSMUSP00000064787,10090.ENSMUSP00000072800…	Wnt3,Sema4f,Efnb3,Map2k1,Gdi1,Rab21,Sema4d,Epha4,Cdk5,Pak1,Shtn1,Sema7a,Ssh2,Picalm,Map6,Cxcl12,Abl1,Golga4,Cntn2,Aatk,Rtn4,Ptk2,Mgll,Spg20,Zfyve27,Mag
GO:0008299	isoprenoid biosynthetic process	9	24	0.72	0.0138	1.86012	10090.ENSMUSP00000006692,10090.ENSMUSP00000022176,10090.ENSMUSP00000029564,10090.ENSMUSP00000036971,10090.ENSMUSP00000055313,10090.ENSMUSP00000080531,10090.ENSMUSP00000084918,10090.ENSMUSP00000132780,10090.ENSMUSP00000136944	Mvd,Hmgcr,Pmvk,Mvk,Fdft1,Fdps,Aldh1a1,Idi1,Hmgcs1
GO:0048709	oligodendrocyte differentiation	15	65	0.51	0.0138	1.86012	10090.ENSMUSP00000021119,10090.ENSMUSP00000028239,10090.ENSMUSP00000029451,10090.ENSMUSP00000030814,10090.ENSMUSP00000033800,10090.ENSMUSP00000043597,10090.ENSMUSP00000043828,10090.ENSMUSP00000052581,10090.ENSMUSP00000054356,10090.ENSMUSP00000083707,10090.ENSMUSP00000099409,10090.ENSMUSP00000102783,10090.ENSMUSP00000138735,10090.ENSMUSP00000139601,10090.ENSMUSP00000139881	Aspa,Gsn,Tspan2,Cdk5,Plp1,Fa2h,Hdac11,Lpar1,Kcnj10,Cntn2,Cnp,Tenm4,Slc8a3,Myrf,Mag
GO:0045685	regulation of glial cell differentiation	16	73	0.49	0.0142	1.84771	10090.ENSMUSP00000005406,10090.ENSMUSP00000021119,10090.ENSMUSP00000025239,10090.ENSMUSP00000027451,10090.ENSMUSP00000027695,10090.ENSMUSP00000028836,10090.ENSMUSP00000034713,10090.ENSMUSP00000043676,10090.ENSMUSP00000044580,10090.ENSMUSP00000052085,10090.ENSMUSP00000056464,10090.ENSMUSP00000083707,10090.ENSMUSP00000099907,10090.ENSMUSP00000102783,10090.ENSMUSP00000132640,10090.ENSMUSP00000139881	App,Aspa,Bin1,Epha4,Slc45a3,Bmp2,Ldlr,Dicer1,Ttbk1,Daam2,Rnf112,Cntn2,Rtn4,Tenm4,Enpp2,Mag
GO:0006643	membrane lipid metabolic process	24	141	0.38	0.0146	1.83565	10090.ENSMUSP00000006557,10090.ENSMUSP00000015858,10090.ENSMUSP00000021424,10090.ENSMUSP00000021920,10090.ENSMUSP00000022207,10090.ENSMUSP00000022292,10090.ENSMUSP00000025477,10090.ENSMUSP00000026823,10090.ENSMUSP00000033754,10090.ENSMUSP00000034537,10090.ENSMUSP00000044418,10090.ENSMUSP00000045351,10090.ENSMUSP00000048519,10090.ENSMUSP00000050852,10090.ENSMUSP00000052838,10090.ENSMUSP00000060462…	Elovl1,Cers2,Sptlc2,Sptlc1,Elovl7,Samd8,St8sia3,Pigq,Piga,St3gal4,Spns2,Pigk,Degs1,Ugt8a,Pigm,Ptplb,St6galnac3,Elovl6,Sphk2,Asah2,Pgap1,Pigc,Map7,Pign
GO:0099612	protein localization to axon	6	9	0.97	0.0152	1.81816	10090.ENSMUSP00000028854,10090.ENSMUSP00000050852,10090.ENSMUSP00000083707,10090.ENSMUSP00000090089,10090.ENSMUSP00000092148,10090.ENSMUSP00000108300	Mal,Ugt8a,Cntn2,Ank3,Nfasc,Epb4.1l3
GO:0031346	positive regulation of cell projection organization	47	371	0.25	0.0173	1.76195	10090.ENSMUSP00000000127,10090.ENSMUSP00000000724,10090.ENSMUSP00000005066,10090.ENSMUSP00000008878,10090.ENSMUSP00000015435,10090.ENSMUSP00000020343,10090.ENSMUSP00000020999,10090.ENSMUSP00000021900,10090.ENSMUSP00000027451,10090.ENSMUSP00000031377,10090.ENSMUSP00000031606,10090.ENSMUSP00000033040,10090.ENSMUSP00000034630,10090.ENSMUSP00000034878,10090.ENSMUSP00000041378,10090.ENSMUSP00000042211…	Wnt3,Kat2b,Map2k1,Gprc5b,Gdi1,Rab21,Kif3c,Sema4d,Epha4,Scarb2,Rasal1,Pak1,Fez1,Tmem30a,Shtn1,Sema7a,Anln,Rims2,Picalm,Lpar1,Itsn2,Cdc42ep2,Tapt1,Map6,Cenpj,Lrrc16a,Cxcl12,Apc,Golga4,Smurf1,Dlg5,Rap1a,Mfn1,Il1rap,Hspa5,Ptn,Nfe2l2,Ptprd,Rtn4,Ccp110,Eurl,Cpeb3,Vldlr,Zfyve27,Enpp2,Auts2,Tenm3
GO:0014015	positive regulation of gliogenesis	15	67	0.5	0.0175	1.75696	10090.ENSMUSP00000003369,10090.ENSMUSP00000005406,10090.ENSMUSP00000014743,10090.ENSMUSP00000021119,10090.ENSMUSP00000025239,10090.ENSMUSP00000028836,10090.ENSMUSP00000035158,10090.ENSMUSP00000043676,10090.ENSMUSP00000044580,10090.ENSMUSP00000056464,10090.ENSMUSP00000099907,10090.ENSMUSP00000102783,10090.ENSMUSP00000105663,10090.ENSMUSP00000132640,10090.ENSMUSP00000139881	Plag1,App,Csf1,Aspa,Bin1,Bmp2,Trf,Dicer1,Ttbk1,Rnf112,Rtn4,Tenm4,Ptk2,Enpp2,Mag
GO:0014003	oligodendrocyte development	11	38	0.61	0.0176	1.75449	10090.ENSMUSP00000021119,10090.ENSMUSP00000028239,10090.ENSMUSP00000033800,10090.ENSMUSP00000043597,10090.ENSMUSP00000043828,10090.ENSMUSP00000052581,10090.ENSMUSP00000054356,10090.ENSMUSP00000083707,10090.ENSMUSP00000102783,10090.ENSMUSP00000139601,10090.ENSMUSP00000139881	Aspa,Gsn,Plp1,Fa2h,Hdac11,Lpar1,Kcnj10,Cntn2,Tenm4,Myrf,Mag
GO:0060322	head development	73	657	0.19	0.0176	1.75449	10090.ENSMUSP00000000127,10090.ENSMUSP00000002603,10090.ENSMUSP00000005066,10090.ENSMUSP00000005406,10090.ENSMUSP00000006828,10090.ENSMUSP00000020106,10090.ENSMUSP00000021921,10090.ENSMUSP00000023099,10090.ENSMUSP00000023352,10090.ENSMUSP00000023359,10090.ENSMUSP00000028763,10090.ENSMUSP00000028781,10090.ENSMUSP00000028836,10090.ENSMUSP00000029451,10090.ENSMUSP00000029587,10090.ENSMUSP00000030398…	Wnt3,Scrib,Map2k1,App,Aplp1,Arid5b,Ptch1,Slc38a2,Prkdc,Nde1,Tyro3,Atrn,Bmp2,Tspan2,Neurog2,Slc2a1,Stmn1,Cdk5,Pak1,Bag3,Atp6ap2,Sall1,Fez1,Plekha1,Spef2,Gdpd5,Myo1d,Foxj1,Rab3gap1,Rras,Sema7a,Rpgrip1l,Dicer1,Acsl3,Kndc1,Mapk3,Lpar1,Kcna1,Atxn2,Aplp2,Sphk2,Cxcl12,Btbd3,Abl1,Tacc1,Mfsd7b,Cntn2,Dlg5,Atxn1l,Srgap2,Pgap1,Hspa5,Ptn,Aatk,Cnp,Stxbp3a,Rtn4,Unc5c,Eml1,Bcl2l11,Kif1a,Eurl,Sema4c,Fgfr2,Cdon,Gn…
GO:0010976	positive regulation of neuron projection development	38	280	0.28	0.0189	1.72354	10090.ENSMUSP00000000127,10090.ENSMUSP00000000724,10090.ENSMUSP00000005066,10090.ENSMUSP00000008878,10090.ENSMUSP00000015435,10090.ENSMUSP00000020343,10090.ENSMUSP00000020999,10090.ENSMUSP00000021900,10090.ENSMUSP00000027451,10090.ENSMUSP00000031377,10090.ENSMUSP00000031606,10090.ENSMUSP00000033040,10090.ENSMUSP00000034630,10090.ENSMUSP00000034878,10090.ENSMUSP00000041378,10090.ENSMUSP00000042211…	Wnt3,Kat2b,Map2k1,Gprc5b,Gdi1,Rab21,Kif3c,Sema4d,Epha4,Scarb2,Rasal1,Pak1,Fez1,Tmem30a,Shtn1,Sema7a,Rims2,Picalm,Lpar1,Itsn2,Map6,Cxcl12,Golga4,Smurf1,Dlg5,Rap1a,Mfn1,Il1rap,Hspa5,Ptn,Nfe2l2,Ptprd,Rtn4,Eurl,Cpeb3,Vldlr,Zfyve27,Tenm3
GO:0010256	endomembrane system organization	38	281	0.28	0.02	1.69897	10090.ENSMUSP00000005066,10090.ENSMUSP00000005256,10090.ENSMUSP00000018315,10090.ENSMUSP00000020023,10090.ENSMUSP00000025239,10090.ENSMUSP00000025482,10090.ENSMUSP00000025668,10090.ENSMUSP00000027178,10090.ENSMUSP00000027743,10090.ENSMUSP00000031081,10090.ENSMUSP00000031355,10090.ENSMUSP00000031378,10090.ENSMUSP00000032568,10090.ENSMUSP00000032888,10090.ENSMUSP00000034431,10090.ENSMUSP00000041378…	Map2k1,Ndrg1,Vmp1,Reep3,Bin1,Atp8b1,Atl3,Als2,Stx6,Pi4k2b,Uso1,Stx2,Dmpk,Arl6ip1,Tmem170,Shtn1,Micall1,Usp6nl,Fa2h,Coro7,Tmed2,Sh3tc2,Snx33,Plk3,Mpp5,Stx16,Tmcc1,Ank3,Exoc8,Arfgef2,Rtn4,Syt11,Epb4.1l3,Nbeal2,Zfyve27,Myo18a,Tjap1,Myrf
GO:0040008	regulation of growth	68	605	0.2	0.0204	1.69037	10090.ENSMUSP00000000127,10090.ENSMUSP00000000641,10090.ENSMUSP00000005406,10090.ENSMUSP00000007803,10090.ENSMUSP00000014743,10090.ENSMUSP00000015435,10090.ENSMUSP00000018012,10090.ENSMUSP00000020343,10090.ENSMUSP00000021900,10090.ENSMUSP00000021921,10090.ENSMUSP00000022529,10090.ENSMUSP00000022701,10090.ENSMUSP00000023352,10090.ENSMUSP00000023478,10090.ENSMUSP00000024636,10090.ENSMUSP00000025590…	Wnt3,Sema4f,App,Bcl2l1,Csf1,Gdi1,Sgk2,Rab21,Sema4d,Ptch1,Tkt,Rb1,Prkdc,Igsf11,Fgfr1op,Osbp,Atrn,Cdk5,Rasal1,Adipor2,Pak1,Morf4l2,Nkd1,Cryab,Scd1,Dcbld2,Shtn1,Sema7a,Rftn1,Tspyl2,Rims2,Picalm,Itsn2,Atxn2,Kctd11,Dlg1,Cxcl12,Abl1,Apc,Notch2,Fdps,Myh6,Golga4,Mfsd7b,Smurf1,Cdkn2d,Ncoa3,Mtm1,Aatk,Rtn4,Gamt,Ptk2,Bcl2l11,Epb4.1l3,Mgll,Fgfr2,Ddr1,Spg20,Sbf1,Stat3,Sepp1,Apbb2,Zfyve27,D7Ertd443e,Prox1,Meis1…
GO:0007626	locomotory behavior	28	184	0.33	0.0223	1.6517	10090.ENSMUSP00000004036,10090.ENSMUSP00000005185,10090.ENSMUSP00000005406,10090.ENSMUSP00000008878,10090.ENSMUSP00000016172,10090.ENSMUSP00000025279,10090.ENSMUSP00000027178,10090.ENSMUSP00000027451,10090.ENSMUSP00000033975,10090.ENSMUSP00000036181,10090.ENSMUSP00000039473,10090.ENSMUSP00000045910,10090.ENSMUSP00000047285,10090.ENSMUSP00000052185,10090.ENSMUSP00000054356,10090.ENSMUSP00000055000…	Efnb3,Cstb,App,Gprc5b,Celsr1,Npc1,Als2,Epha4,Ddhd2,Myo6,Rcan2,Inpp5f,Pak7,Gpr37,Kcnj10,Adam22,Aplp2,Cxcl12,Cacnb4,Cntn2,Cnp,Tmod1,Oxr1,Adcy5,Gnao1,Strn,Sepp1,Meis1
GO:0009987	cellular process	822	10775	0.03	0.0241	1.61798	10090.ENSMUSP00000000080,10090.ENSMUSP00000000127,10090.ENSMUSP00000000153,10090.ENSMUSP00000000384,10090.ENSMUSP00000000590,10090.ENSMUSP00000000641,10090.ENSMUSP00000000724,10090.ENSMUSP00000000808,10090.ENSMUSP00000000958,10090.ENSMUSP00000001181,10090.ENSMUSP00000001479,10090.ENSMUSP00000001583,10090.ENSMUSP00000001592,10090.ENSMUSP00000002081,10090.ENSMUSP00000002099,10090.ENSMUSP00000002292…	Klf6,Wnt3,Gna12,Trappc10,Rdx,Sema4f,Kat2b,Il12rb1,Top1mt,Col6a2,Kpnb1,Ell2,Jup,Srpk3,Ift46,Rmnd5a,Scrib,Flii,Plag1,Abhd17a,Elavl3,Dusp3,Man1a,Efnb3,Gstm7,Map3k11,Hmox2,Cdip1,Mcoln1,Plod3,Hapln2,Map2k1,Prkacb,Ndrg1,App,Ctr9,Pex1,Elovl1,Tmem189,Mvd,Itih3,Aplp1,Pip4k2a,Acat2,Bcl2l1,Gprc5b,Gosr1,Pea15a,Csf1,Nol3,Tppp3,Gdi1,Ctsk,Cers2,Qdpr,Rrbp1,Celsr1,Nkap,Cyth1,Casc3,Mpp2,Rab11fip4,Sgk2,Stard3,Vmp1,…
GO:0050789	regulation of biological process	640	8160	0.04	0.0243	1.61439	10090.ENSMUSP00000000080,10090.ENSMUSP00000000127,10090.ENSMUSP00000000153,10090.ENSMUSP00000000590,10090.ENSMUSP00000000641,10090.ENSMUSP00000000724,10090.ENSMUSP00000000808,10090.ENSMUSP00000001479,10090.ENSMUSP00000001583,10090.ENSMUSP00000001592,10090.ENSMUSP00000002081,10090.ENSMUSP00000002099,10090.ENSMUSP00000002572,10090.ENSMUSP00000002603,10090.ENSMUSP00000002889,10090.ENSMUSP00000003369…	Klf6,Wnt3,Gna12,Rdx,Sema4f,Kat2b,Il12rb1,Kpnb1,Ell2,Jup,Srpk3,Ift46,Slc9a3r2,Scrib,Flii,Plag1,Abhd17a,Dusp3,Efnb3,Gstm7,Map3k11,Cdip1,Mcoln1,Mospd2,Map2k1,Prkacb,Cstb,Ndrg1,App,Ctr9,Mvd,Itih3,Aplp1,Pip4k2a,Acat2,Bcl2l1,Carhsp1,Gprc5b,Gosr1,Adam19,Pea15a,Wdfy2,Csf1,Nol3,Cnksr3,Gdi1,Cers2,Rrbp1,Celsr1,Tmbim1,Nkap,Cyth1,Casc3,Mpp2,Rab11fip4,Sgk2,Dync1h1,Nrbp2,Pdk4,Sema6a,Ube2d1,Arid5b,Fgd6,Rab21,Dnm…
GO:0014044	Schwann cell development	9	27	0.67	0.0247	1.6073	10090.ENSMUSP00000005256,10090.ENSMUSP00000030814,10090.ENSMUSP00000043597,10090.ENSMUSP00000043676,10090.ENSMUSP00000055000,10090.ENSMUSP00000055094,10090.ENSMUSP00000080683,10090.ENSMUSP00000081225,10090.ENSMUSP00000137374	Ndrg1,Cdk5,Fa2h,Dicer1,Adam22,Sh3tc2,Mpp5,Arhgef10,Pou3f1
GO:0007043	cell-cell junction assembly	13	55	0.52	0.0257	1.59007	10090.ENSMUSP00000001592,10090.ENSMUSP00000025893,10090.ENSMUSP00000049007,10090.ENSMUSP00000050852,10090.ENSMUSP00000064280,10090.ENSMUSP00000066068,10090.ENSMUSP00000080683,10090.ENSMUSP00000087879,10090.ENSMUSP00000092148,10090.ENSMUSP00000099815,10090.ENSMUSP00000107492,10090.ENSMUSP00000108300,10090.ENSMUSP00000119790	Jup,Arl2,Ctnna1,Ugt8a,Dlg1,Actn4,Mpp5,Dlg5,Nfasc,Pkp4,Pdcd6ip,Epb4.1l3,Heg1
GO:1902531	regulation of intracellular signal transduction	134	1395	0.13	0.0264	1.5784	10090.ENSMUSP00000000153,10090.ENSMUSP00000002572,10090.ENSMUSP00000003612,10090.ENSMUSP00000004137,10090.ENSMUSP00000004156,10090.ENSMUSP00000005066,10090.ENSMUSP00000005406,10090.ENSMUSP00000006828,10090.ENSMUSP00000007803,10090.ENSMUSP00000008878,10090.ENSMUSP00000014743,10090.ENSMUSP00000014920,10090.ENSMUSP00000015346,10090.ENSMUSP00000016309,10090.ENSMUSP00000017276,10090.ENSMUSP00000020208…	Gna12,Slc9a3r2,Dusp3,Gstm7,Map3k11,Map2k1,App,Aplp1,Bcl2l1,Gprc5b,Csf1,Nol3,Cnksr3,Tmbim1,Cyth1,Fgd6,Itgb3,Rffl,Sema4d,Hmgcr,Spata13,Sorbs3,Bcl2l2,Litaf,Map4k2,Il23a,Pde8a,Als2,Epha4,Bmp2,Fam83d,Pdgfc,Murc,Leprot,Stmn1,Errfi1,Cdk5,Prkcz,Rasal1,Kctd13,Pak1,Atp6ap2,Dapk2,Trf,Plekha1,Fkbp1a,Git1,Jcad,Atp2c1,Mmd2,Rcan2,Cyld,Phlda3,Cbl,Rab3gap1,Rras,Sema7a,Lpar6,Icmt,Parl,Fgf1,Inpp5f,Pak7,Ptpn13,Mapk8…
GO:0006796	phosphate-containing compound metabolic process	149	1581	0.12	0.0267	1.57349	10090.ENSMUSP00000000808,10090.ENSMUSP00000002081,10090.ENSMUSP00000002603,10090.ENSMUSP00000003612,10090.ENSMUSP00000004036,10090.ENSMUSP00000004156,10090.ENSMUSP00000005066,10090.ENSMUSP00000005164,10090.ENSMUSP00000005406,10090.ENSMUSP00000006692,10090.ENSMUSP00000006912,10090.ENSMUSP00000018012,10090.ENSMUSP00000019516,10090.ENSMUSP00000019721,10090.ENSMUSP00000020217,10090.ENSMUSP00000020251…	Il12rb1,Srpk3,Scrib,Dusp3,Efnb3,Map3k11,Map2k1,Prkacb,App,Mvd,Pip4k2a,Sgk2,Nrbp2,Pdk4,Nudt4,Gnptab,Sptlc2,Ippk,Sptlc1,Hmgcr,Samd8,Tkt,Prkdc,Ehhadh,Gpd1,Agpat4,Map4k2,Pcyt2,Pde8a,Pigq,Smad7,Epha4,Kif5c,Tyro3,Bmp2,Acss2,Pmvk,Alpk1,Ctps,Cdk5,Prkcz,Ppp2r2c,Pi4k2b,Cdc7,Cds1,Etnk1,Dmpk,Pak1,Piga,Acsl1,Mtmr2,Cryab,Dapk2,Trf,Pdk3,Mvk,Bmp2k,Mmd2,Cdk19,Tesk2,Cbl,Ssh2,Rps6ka5,Dnajc6,Pcyt1b,Ttbk1,Pigk,Mboat1…
GO:0050794	regulation of cellular process	607	7704	0.04	0.0267	1.57349	10090.ENSMUSP00000000080,10090.ENSMUSP00000000127,10090.ENSMUSP00000000153,10090.ENSMUSP00000000590,10090.ENSMUSP00000000641,10090.ENSMUSP00000000724,10090.ENSMUSP00000000808,10090.ENSMUSP00000001479,10090.ENSMUSP00000001583,10090.ENSMUSP00000001592,10090.ENSMUSP00000002081,10090.ENSMUSP00000002099,10090.ENSMUSP00000002572,10090.ENSMUSP00000002603,10090.ENSMUSP00000002889,10090.ENSMUSP00000003369…	Klf6,Wnt3,Gna12,Rdx,Sema4f,Kat2b,Il12rb1,Kpnb1,Ell2,Jup,Srpk3,Ift46,Slc9a3r2,Scrib,Flii,Plag1,Dusp3,Efnb3,Gstm7,Map3k11,Cdip1,Mcoln1,Mospd2,Map2k1,Prkacb,Cstb,Ndrg1,App,Ctr9,Mvd,Itih3,Aplp1,Pip4k2a,Bcl2l1,Carhsp1,Gprc5b,Gosr1,Pea15a,Wdfy2,Csf1,Nol3,Cnksr3,Gdi1,Cers2,Rrbp1,Celsr1,Tmbim1,Nkap,Cyth1,Casc3,Mpp2,Rab11fip4,Sgk2,Dync1h1,Nrbp2,Pdk4,Sema6a,Ube2d1,Arid5b,Fgd6,Rab21,Dnmt3a,Kif3c,Itgb3,Rffl,…
GO:0051239	regulation of multicellular organismal process	215	2415	0.1	0.0272	1.56543	10090.ENSMUSP00000000127,10090.ENSMUSP00000000641,10090.ENSMUSP00000000724,10090.ENSMUSP00000000808,10090.ENSMUSP00000001592,10090.ENSMUSP00000003369,10090.ENSMUSP00000004036,10090.ENSMUSP00000005066,10090.ENSMUSP00000005164,10090.ENSMUSP00000005406,10090.ENSMUSP00000005749,10090.ENSMUSP00000007005,10090.ENSMUSP00000008878,10090.ENSMUSP00000014743,10090.ENSMUSP00000014920,10090.ENSMUSP00000015435…	Wnt3,Sema4f,Kat2b,Il12rb1,Jup,Plag1,Efnb3,Map2k1,Prkacb,App,Ctr9,Acat2,Gprc5b,Csf1,Nol3,Gdi1,Cers2,Celsr1,Tmbim1,Nkap,Pdk4,Sema6a,Rab21,Kif3c,Itgb3,Aspa,Sema4d,Ptch1,Hmgcr,Plau,Lect1,Bmp1,Rb1,Ank,Litaf,Arc,Enpp4,Tmem178,Bin1,Il23a,Alox5,Smad7,Trip12,Epha4,Slc45a3,Grb14,Atrn,Bmp2,Angpt4,Car2,Anxa5,Neurog2,Zbtb7b,Errfi1,Cdk5,Prkcz,Scarb2,Rasal1,Mgp,Dmpk,Sh3gl3,Pak1,Stim1,Atp6ap2,Plat,Nkd1,Sall1,Mtm…
GO:0051270	regulation of cellular component movement	83	788	0.17	0.0288	1.54061	10090.ENSMUSP00000000127,10090.ENSMUSP00000000153,10090.ENSMUSP00000000590,10090.ENSMUSP00000001592,10090.ENSMUSP00000004715,10090.ENSMUSP00000005066,10090.ENSMUSP00000005406,10090.ENSMUSP00000014743,10090.ENSMUSP00000015858,10090.ENSMUSP00000019791,10090.ENSMUSP00000021028,10090.ENSMUSP00000021036,10090.ENSMUSP00000021900,10090.ENSMUSP00000022368,10090.ENSMUSP00000022566,10090.ENSMUSP00000024636…	Wnt3,Gna12,Rdx,Jup,Mospd2,Map2k1,App,Csf1,Cers2,Sema6a,Itgb3,Rffl,Sema4d,Plau,Spata13,Fgfr1op,Bin1,Il23a,Bmp2,Angpt4,Anxa5,Pdgfc,Stmn1,Padi2,Cdk5,Pak1,Lamp1,Jam3,Fez1,Dapk2,Trf,Dock5,Kcnj2,Jcad,Igsf8,Shtn1,Clic4,Rras,Atp8a1,Ssh2,Fgf1,Inpp5f,Ctnna1,Slk,D1Ertd622e,Mapk3,Lpar1,Rap2a,Sorl1,Dlg1,Actn4,Rhob,Tnfaip6,Mink1,Lrrc16a,Cxcl12,Abl1,Dock10,Apc,Tmeff2,Ddrgk1,Dlg5,Lama2,Mtus1,Srgap2,Hspa5,Limch1,…
GO:0048513	animal organ development	223	2521	0.09	0.0288	1.54061	10090.ENSMUSP00000000127,10090.ENSMUSP00000000724,10090.ENSMUSP00000001592,10090.ENSMUSP00000002081,10090.ENSMUSP00000002418,10090.ENSMUSP00000002603,10090.ENSMUSP00000003369,10090.ENSMUSP00000004968,10090.ENSMUSP00000005066,10090.ENSMUSP00000005406,10090.ENSMUSP00000006828,10090.ENSMUSP00000006912,10090.ENSMUSP00000007803,10090.ENSMUSP00000011400,10090.ENSMUSP00000014743,10090.ENSMUSP00000015950…	Wnt3,Kat2b,Jup,Srpk3,Borcs8,Scrib,Plag1,Plod3,Map2k1,App,Aplp1,Pip4k2a,Bcl2l1,Adam19,Csf1,Qdpr,Celsr1,Nkap,Rab11fip4,Arid5b,Sema4d,Ptch1,Ctsl,Lect1,Bmp1,Rb1,Bcl2l2,Slc38a2,Prkdc,Nde1,Slc11a2,Igf2r,Atp8b1,Fech,Smad7,Epha4,Tyro3,Atrn,Bmp2,Car2,Fam83d,Tspan2,Neurog2,Pdgfc,Zbtb7b,Thbs3,Murc,Slc2a1,Stmn1,Errfi1,Cdk5,Aacs,Cul1,Adipor2,Mgp,Pak1,Bag3,Stim1,Ebp,Nsdhl,Slc6a8,Asah1,Sall1,Jam3,Pvrl1,Cryab,Fe…
GO:0006793	phosphorus metabolic process	150	1598	0.12	0.029	1.5376	10090.ENSMUSP00000000808,10090.ENSMUSP00000002081,10090.ENSMUSP00000002603,10090.ENSMUSP00000003612,10090.ENSMUSP00000004036,10090.ENSMUSP00000004156,10090.ENSMUSP00000005066,10090.ENSMUSP00000005164,10090.ENSMUSP00000005406,10090.ENSMUSP00000006692,10090.ENSMUSP00000006912,10090.ENSMUSP00000018012,10090.ENSMUSP00000019516,10090.ENSMUSP00000019721,10090.ENSMUSP00000020217,10090.ENSMUSP00000020251…	Il12rb1,Srpk3,Scrib,Dusp3,Efnb3,Map3k11,Map2k1,Prkacb,App,Mvd,Pip4k2a,Sgk2,Nrbp2,Pdk4,Nudt4,Gnptab,Sptlc2,Ippk,Sptlc1,Hmgcr,Samd8,Tkt,Prkdc,Ehhadh,Gpd1,Agpat4,Map4k2,Pcyt2,Pde8a,Pigq,Smad7,Epha4,Kif5c,Tyro3,Bmp2,Acss2,Pmvk,Alpk1,Ctps,Cdk5,Prkcz,Ppp2r2c,Pi4k2b,Cdc7,Cds1,Etnk1,Dmpk,Pak1,Piga,Acsl1,Mtmr2,Cryab,Dapk2,Trf,Pdk3,Mvk,Bmp2k,Mmd2,Cdk19,Tesk2,Cbl,Ssh2,Rps6ka5,Dnajc6,Pcyt1b,Ttbk1,Pigk,Mboat1…
GO:0045595	regulation of cell differentiation	140	1477	0.12	0.0309	1.51004	10090.ENSMUSP00000000127,10090.ENSMUSP00000000641,10090.ENSMUSP00000000724,10090.ENSMUSP00000003369,10090.ENSMUSP00000004036,10090.ENSMUSP00000005066,10090.ENSMUSP00000005406,10090.ENSMUSP00000005749,10090.ENSMUSP00000008878,10090.ENSMUSP00000014691,10090.ENSMUSP00000014743,10090.ENSMUSP00000015435,10090.ENSMUSP00000015858,10090.ENSMUSP00000016553,10090.ENSMUSP00000019791,10090.ENSMUSP00000020343…	Wnt3,Sema4f,Kat2b,Plag1,Efnb3,Map2k1,App,Ctr9,Gprc5b,Wdfy2,Csf1,Gdi1,Cers2,Nkap,Sema6a,Rab21,Kif3c,Itgb3,Aspa,Sema4d,Ptch1,Rb1,Arc,Tmem178,Bin1,Il23a,Smad7,Epha4,Slc45a3,Grb14,Bmp2,Car2,Neurog2,Zbtb7b,Errfi1,Cdk5,Prkcz,Scarb2,Rasal1,Dmpk,Sh3gl3,Pak1,Morf4l2,Sall1,Phldb1,Fez1,Ldlr,Tmem30a,Trf,Tob1,Gdpd5,Adamts20,Dock5,Lzts3,Foxj1,Mmd2,Cyld,Shtn1,Sema7a,Ssh2,Dicer1,Ttbk1,Tcta,Inpp5f,Inpp5j,Zbtb7a,R…
GO:0045687	positive regulation of glial cell differentiation	11	42	0.57	0.0311	1.50724	10090.ENSMUSP00000005406,10090.ENSMUSP00000021119,10090.ENSMUSP00000025239,10090.ENSMUSP00000028836,10090.ENSMUSP00000043676,10090.ENSMUSP00000044580,10090.ENSMUSP00000056464,10090.ENSMUSP00000099907,10090.ENSMUSP00000102783,10090.ENSMUSP00000132640,10090.ENSMUSP00000139881	App,Aspa,Bin1,Bmp2,Dicer1,Ttbk1,Rnf112,Rtn4,Tenm4,Enpp2,Mag
GO:1903828	negative regulation of cellular protein localization	19	107	0.4	0.033	1.48149	10090.ENSMUSP00000003436,10090.ENSMUSP00000007803,10090.ENSMUSP00000014920,10090.ENSMUSP00000015435,10090.ENSMUSP00000016309,10090.ENSMUSP00000030254,10090.ENSMUSP00000030814,10090.ENSMUSP00000033136,10090.ENSMUSP00000037627,10090.ENSMUSP00000045478,10090.ENSMUSP00000051092,10090.ENSMUSP00000056099,10090.ENSMUSP00000060225,10090.ENSMUSP00000061877,10090.ENSMUSP00000088291,10090.ENSMUSP00000092223…	Abhd17a,Bcl2l1,Nol3,Gdi1,Tmbim1,Leprot,Cdk5,Bag3,Trp53inp2,Lzts2,Picalm,Abhd17b,Snx33,Insig1,Otud7b,Map1a,Svip,Gpm6b,Apod
GO:0001952	regulation of cell-matrix adhesion	17	90	0.42	0.0337	1.47237	10090.ENSMUSP00000001592,10090.ENSMUSP00000014743,10090.ENSMUSP00000021028,10090.ENSMUSP00000022368,10090.ENSMUSP00000030922,10090.ENSMUSP00000036740,10090.ENSMUSP00000049977,10090.ENSMUSP00000072649,10090.ENSMUSP00000073612,10090.ENSMUSP00000075167,10090.ENSMUSP00000098723,10090.ENSMUSP00000105663,10090.ENSMUSP00000107848,10090.ENSMUSP00000110798,10090.ENSMUSP00000113062,10090.ENSMUSP00000119827…	Jup,Csf1,Itgb3,Plau,Prkcz,Ninj1,Slk,Mink1,Sema3e,Abl1,Limch1,Ptk2,Gpm6b,Onecut2,Ddr1,Apod,Enpp2
GO:0007266	Rho protein signal transduction	12	50	0.53	0.034	1.46852	10090.ENSMUSP00000000153,10090.ENSMUSP00000016172,10090.ENSMUSP00000030033,10090.ENSMUSP00000033040,10090.ENSMUSP00000041378,10090.ENSMUSP00000047285,10090.ENSMUSP00000059883,10090.ENSMUSP00000065571,10090.ENSMUSP00000095832,10090.ENSMUSP00000099628,10090.ENSMUSP00000126598,10090.ENSMUSP00000129220	Gna12,Celsr1,Murc,Pak1,Shtn1,Pak7,Cdc42ep2,Rtkn,Rhog,Phactr4,Arhgef12,Myo9b
GO:0046474	glycerophospholipid biosynthetic process	18	99	0.41	0.0347	1.45967	10090.ENSMUSP00000024594,10090.ENSMUSP00000026129,10090.ENSMUSP00000026823,10090.ENSMUSP00000031273,10090.ENSMUSP00000032413,10090.ENSMUSP00000033754,10090.ENSMUSP00000044280,10090.ENSMUSP00000045351,10090.ENSMUSP00000052838,10090.ENSMUSP00000064334,10090.ENSMUSP00000065743,10090.ENSMUSP00000095346,10090.ENSMUSP00000099470,10090.ENSMUSP00000107221,10090.ENSMUSP00000110583,10090.ENSMUSP00000114272…	Agpat4,Pcyt2,Pigq,Cds1,Etnk1,Piga,Pcyt1b,Pigk,Pigm,Far1,Cept1,Pgap1,Cds2,Pigc,Inpp4a,Etnk2,Ept1,Pign
GO:0061387	regulation of extent of cell growth	18	99	0.41	0.0347	1.45967	10090.ENSMUSP00000000127,10090.ENSMUSP00000000641,10090.ENSMUSP00000015435,10090.ENSMUSP00000020343,10090.ENSMUSP00000021900,10090.ENSMUSP00000030814,10090.ENSMUSP00000033040,10090.ENSMUSP00000041378,10090.ENSMUSP00000042211,10090.ENSMUSP00000072800,10090.ENSMUSP00000075167,10090.ENSMUSP00000081880,10090.ENSMUSP00000099309,10090.ENSMUSP00000099907,10090.ENSMUSP00000109215,10090.ENSMUSP00000113621…	Wnt3,Sema4f,Gdi1,Rab21,Sema4d,Cdk5,Pak1,Shtn1,Sema7a,Cxcl12,Abl1,Golga4,Aatk,Rtn4,Mgll,Spg20,Zfyve27,Mag
GO:0016482	cytosolic transport	19	108	0.39	0.0351	1.45469	10090.ENSMUSP00000000384,10090.ENSMUSP00000010536,10090.ENSMUSP00000024717,10090.ENSMUSP00000027743,10090.ENSMUSP00000033824,10090.ENSMUSP00000035155,10090.ENSMUSP00000037819,10090.ENSMUSP00000038983,10090.ENSMUSP00000048489,10090.ENSMUSP00000061472,10090.ENSMUSP00000065456,10090.ENSMUSP00000068487,10090.ENSMUSP00000073462,10090.ENSMUSP00000079974,10090.ENSMUSP00000085218,10090.ENSMUSP00000099349…	Trappc10,Gosr1,Tbc1d5,Stx6,Lamp1,Rab6b,Myo1d,Fam21,Coro7,Kif1b,Rab7b,Tgoln1,Mon2,Wdr91,Stx16,Wipi1,Sort1,Tmem87b,Klhl20
GO:0007420	brain development	67	612	0.19	0.0362	1.44129	10090.ENSMUSP00000000127,10090.ENSMUSP00000002603,10090.ENSMUSP00000005066,10090.ENSMUSP00000005406,10090.ENSMUSP00000006828,10090.ENSMUSP00000021921,10090.ENSMUSP00000023099,10090.ENSMUSP00000023352,10090.ENSMUSP00000023359,10090.ENSMUSP00000028763,10090.ENSMUSP00000028781,10090.ENSMUSP00000028836,10090.ENSMUSP00000029451,10090.ENSMUSP00000029587,10090.ENSMUSP00000030398,10090.ENSMUSP00000030636…	Wnt3,Scrib,Map2k1,App,Aplp1,Ptch1,Slc38a2,Prkdc,Nde1,Tyro3,Atrn,Bmp2,Tspan2,Neurog2,Slc2a1,Stmn1,Cdk5,Pak1,Bag3,Sall1,Fez1,Spef2,Gdpd5,Myo1d,Foxj1,Rab3gap1,Sema7a,Rpgrip1l,Dicer1,Acsl3,Kndc1,Lpar1,Kcna1,Atxn2,Aplp2,Sphk2,Cxcl12,Btbd3,Abl1,Tacc1,Cntn2,Dlg5,Atxn1l,Srgap2,Pgap1,Hspa5,Ptn,Aatk,Cnp,Stxbp3a,Rtn4,Unc5c,Eml1,Bcl2l11,Kif1a,Eurl,Sema4c,Fgfr2,Cdon,Gnao1,Apod,Sepp1,Pafah1b2,Prox1,Hmgcs1,Pou3…
GO:0043217	myelin maintenance	6	12	0.85	0.0376	1.42481	10090.ENSMUSP00000005256,10090.ENSMUSP00000043597,10090.ENSMUSP00000055094,10090.ENSMUSP00000080683,10090.ENSMUSP00000108300,10090.ENSMUSP00000139601	Ndrg1,Fa2h,Sh3tc2,Mpp5,Epb4.1l3,Myrf
GO:1905048	regulation of metallopeptidase activity	6	12	0.85	0.0376	1.42481	10090.ENSMUSP00000046185,10090.ENSMUSP00000051092,10090.ENSMUSP00000051619,10090.ENSMUSP00000058613,10090.ENSMUSP00000086988,10090.ENSMUSP00000120152	Mbp,Picalm,Mapk3,Sorl1,Ddrgk1,Stat3
GO:0030516	regulation of axon extension	16	83	0.43	0.0376	1.42481	10090.ENSMUSP00000000127,10090.ENSMUSP00000000641,10090.ENSMUSP00000015435,10090.ENSMUSP00000020343,10090.ENSMUSP00000030814,10090.ENSMUSP00000033040,10090.ENSMUSP00000041378,10090.ENSMUSP00000042211,10090.ENSMUSP00000072800,10090.ENSMUSP00000075167,10090.ENSMUSP00000081880,10090.ENSMUSP00000099309,10090.ENSMUSP00000099907,10090.ENSMUSP00000109215,10090.ENSMUSP00000130684,10090.ENSMUSP00000139881	Wnt3,Sema4f,Gdi1,Rab21,Cdk5,Pak1,Shtn1,Sema7a,Cxcl12,Abl1,Golga4,Aatk,Rtn4,Mgll,Zfyve27,Mag
GO:0046394	carboxylic acid biosynthetic process	31	223	0.29	0.0376	1.42481	10090.ENSMUSP00000004968,10090.ENSMUSP00000006557,10090.ENSMUSP00000019199,10090.ENSMUSP00000020957,10090.ENSMUSP00000022207,10090.ENSMUSP00000026221,10090.ENSMUSP00000026795,10090.ENSMUSP00000029135,10090.ENSMUSP00000032402,10090.ENSMUSP00000033800,10090.ENSMUSP00000036936,10090.ENSMUSP00000043597,10090.ENSMUSP00000045291,10090.ENSMUSP00000047393,10090.ENSMUSP00000048519,10090.ENSMUSP00000052872…	Plod3,Elovl1,Plod1,Adi1,Elovl7,Scd2,Alox5,Acss2,Bcat1,Plp1,Scd1,Fa2h,Acsl3,Bpgm,Degs1,Fasn,Fads6,Ptplb,Phgdh,Pla2g4a,Elovl6,Acot7,Glul,Aldh1a1,Acaca,Gamt,Acly,Mgll,Pfkp,Enoph1,Carns1
GO:0034330	cell junction organization	22	137	0.35	0.0394	1.4045	10090.ENSMUSP00000001592,10090.ENSMUSP00000018315,10090.ENSMUSP00000021028,10090.ENSMUSP00000025893,10090.ENSMUSP00000026999,10090.ENSMUSP00000034510,10090.ENSMUSP00000041009,10090.ENSMUSP00000049007,10090.ENSMUSP00000050852,10090.ENSMUSP00000064280,10090.ENSMUSP00000066068,10090.ENSMUSP00000075772,10090.ENSMUSP00000080683,10090.ENSMUSP00000082689,10090.ENSMUSP00000087879,10090.ENSMUSP00000092148…	Jup,Vmp1,Itgb3,Arl2,Smad7,Pvrl1,Tesk2,Ctnna1,Ugt8a,Dlg1,Actn4,Plec,Mpp5,Grhl1,Dlg5,Nfasc,Pkp4,Itgb4,Rassf8,Pdcd6ip,Epb4.1l3,Heg1
GO:0045017	glycerolipid biosynthetic process	19	110	0.38	0.04	1.39794	10090.ENSMUSP00000024594,10090.ENSMUSP00000026129,10090.ENSMUSP00000026823,10090.ENSMUSP00000031273,10090.ENSMUSP00000032413,10090.ENSMUSP00000033754,10090.ENSMUSP00000034046,10090.ENSMUSP00000044280,10090.ENSMUSP00000045351,10090.ENSMUSP00000052838,10090.ENSMUSP00000064334,10090.ENSMUSP00000065743,10090.ENSMUSP00000095346,10090.ENSMUSP00000099470,10090.ENSMUSP00000107221,10090.ENSMUSP00000110583…	Agpat4,Pcyt2,Pigq,Cds1,Etnk1,Piga,Acsl1,Pcyt1b,Pigk,Pigm,Far1,Cept1,Pgap1,Cds2,Pigc,Inpp4a,Etnk2,Ept1,Pign
GO:0031331	positive regulation of cellular catabolic process	39	307	0.25	0.04	1.39794	10090.ENSMUSP00000000590,10090.ENSMUSP00000005066,10090.ENSMUSP00000006912,10090.ENSMUSP00000021424,10090.ENSMUSP00000021920,10090.ENSMUSP00000022701,10090.ENSMUSP00000023760,10090.ENSMUSP00000026999,10090.ENSMUSP00000034713,10090.ENSMUSP00000034905,10090.ENSMUSP00000036039,10090.ENSMUSP00000037210,10090.ENSMUSP00000037627,10090.ENSMUSP00000040946,10090.ENSMUSP00000042070,10090.ENSMUSP00000042188…	Rdx,Map2k1,Pip4k2a,Sptlc2,Sptlc1,Rb1,Gpd1,Smad7,Ldlr,Gclc,Tob1,Git1,Trp53inp2,Ankib1,Rab3gap1,Tpcn1,Fbxl5,Mapk3,Foxo1,Nod1,Snx33,Tnrc6b,Nrd1,Entpd5,Plk3,Smurf1,Edem1,Ddrgk1,Tnrc6a,Svip,Itch,Ptk2,Dact1,Cpeb3,Rc3h1,Pafah1b2,Trim13,Prr5l,Dnajb2
GO:0045597	positive regulation of cell differentiation	89	872	0.16	0.04	1.39794	10090.ENSMUSP00000000127,10090.ENSMUSP00000000724,10090.ENSMUSP00000003369,10090.ENSMUSP00000005066,10090.ENSMUSP00000005406,10090.ENSMUSP00000008878,10090.ENSMUSP00000014691,10090.ENSMUSP00000014743,10090.ENSMUSP00000015435,10090.ENSMUSP00000016553,10090.ENSMUSP00000019791,10090.ENSMUSP00000020343,10090.ENSMUSP00000020999,10090.ENSMUSP00000021028,10090.ENSMUSP00000021119,10090.ENSMUSP00000021900…	Wnt3,Kat2b,Plag1,Map2k1,App,Gprc5b,Wdfy2,Csf1,Gdi1,Nkap,Sema6a,Rab21,Kif3c,Itgb3,Aspa,Sema4d,Ptch1,Rb1,Bin1,Il23a,Epha4,Bmp2,Car2,Neurog2,Zbtb7b,Prkcz,Scarb2,Rasal1,Sh3gl3,Pak1,Morf4l2,Sall1,Fez1,Tmem30a,Trf,Gdpd5,Adamts20,Dock5,Foxj1,Mmd2,Cyld,Shtn1,Sema7a,Dicer1,Ttbk1,Rims2,Picalm,Lpar1,Itsn2,Napepld,Rnf112,Kctd11,Map6,Rab7b,Lrrc16a,Cxcl12,Abl1,Sp7,Apc,Cyb5d2,Notch2,Fdps,Golga4,Smurf1,Ncoa3,Dlg…
GO:0051336	regulation of hydrolase activity	95	945	0.15	0.0413	1.38405	10090.ENSMUSP00000000590,10090.ENSMUSP00000002603,10090.ENSMUSP00000005066,10090.ENSMUSP00000005185,10090.ENSMUSP00000005406,10090.ENSMUSP00000006697,10090.ENSMUSP00000007803,10090.ENSMUSP00000014920,10090.ENSMUSP00000015435,10090.ENSMUSP00000020208,10090.ENSMUSP00000021036,10090.ENSMUSP00000021900,10090.ENSMUSP00000023359,10090.ENSMUSP00000023774,10090.ENSMUSP00000024717,10090.ENSMUSP00000025239…	Rdx,Scrib,Map2k1,Cstb,App,Itih3,Bcl2l1,Nol3,Gdi1,Fgd6,Rffl,Sema4d,Nde1,Slc11a2,Tbc1d5,Bin1,Arl2,Itih5,Als2,Epha4,Agap1,Gsn,Bmp2,Murc,Prkcz,Ppp2r2c,Scarb2,Rasal1,Dmpk,Arl6ip1,Cryab,Ppp1r14a,Fkbp1a,Git1,Myo1d,Dhcr24,Foxj1,Snx13,Rcan2,Rab3gap1,Zfyve1,Usp6nl,Ttbk1,Arhgap29,Psme4,Mbp,Picalm,Mapk3,Lpar1,Dnaja3,Tmed2,Nod1,Ppp1r15b,Sorl1,Depdc1b,Cdc42ep2,Acap2,Wnk1,Rtkn,Nrd1,Casr,Abl1,Arap2,Dock10,Hspa2,…
GO:0022011	myelination in peripheral nervous system	8	24	0.67	0.0415	1.38195	10090.ENSMUSP00000005256,10090.ENSMUSP00000043597,10090.ENSMUSP00000043676,10090.ENSMUSP00000055000,10090.ENSMUSP00000055094,10090.ENSMUSP00000080683,10090.ENSMUSP00000081225,10090.ENSMUSP00000137374	Ndrg1,Fa2h,Dicer1,Adam22,Sh3tc2,Mpp5,Arhgef10,Pou3f1
GO:0035264	multicellular organism growth	17	93	0.41	0.0415	1.38195	10090.ENSMUSP00000003369,10090.ENSMUSP00000020106,10090.ENSMUSP00000035375,10090.ENSMUSP00000041453,10090.ENSMUSP00000043390,10090.ENSMUSP00000043676,10090.ENSMUSP00000054834,10090.ENSMUSP00000073541,10090.ENSMUSP00000078741,10090.ENSMUSP00000082777,10090.ENSMUSP00000085416,10090.ENSMUSP00000108237,10090.ENSMUSP00000109979,10090.ENSMUSP00000111023,10090.ENSMUSP00000112430,10090.ENSMUSP00000114272…	Plag1,Arid5b,Plekha1,Clic4,Icmt,Dicer1,Tmed2,Dhcr7,Notch2,Mfsd7b,Ncoa3,Gpd2,Add1,Slc12a2,Fgfr2,Etnk2,Heg1
GO:0046488	phosphatidylinositol metabolic process	18	102	0.39	0.0415	1.38195	10090.ENSMUSP00000006912,10090.ENSMUSP00000026823,10090.ENSMUSP00000031081,10090.ENSMUSP00000031273,10090.ENSMUSP00000033754,10090.ENSMUSP00000034396,10090.ENSMUSP00000045351,10090.ENSMUSP00000045910,10090.ENSMUSP00000046625,10090.ENSMUSP00000052838,10090.ENSMUSP00000079164,10090.ENSMUSP00000095346,10090.ENSMUSP00000099040,10090.ENSMUSP00000101256,10090.ENSMUSP00000107221,10090.ENSMUSP00000110583…	Pip4k2a,Pigq,Pi4k2b,Cds1,Piga,Mtmr2,Pigk,Inpp5f,Inpp5j,Pigm,Synj2,Pgap1,Mtm1,Plch2,Pigc,Inpp4a,Tmem55b,Pign
GO:0000226	microtubule cytoskeleton organization	46	383	0.23	0.0415	1.38195	10090.ENSMUSP00000001479,10090.ENSMUSP00000002099,10090.ENSMUSP00000014990,10090.ENSMUSP00000018851,10090.ENSMUSP00000022057,10090.ENSMUSP00000023359,10090.ENSMUSP00000024636,10090.ENSMUSP00000025893,10090.ENSMUSP00000029571,10090.ENSMUSP00000030636,10090.ENSMUSP00000030922,10090.ENSMUSP00000034562,10090.ENSMUSP00000035055,10090.ENSMUSP00000035762,10090.ENSMUSP00000037788,10090.ENSMUSP00000037978…	Kpnb1,Ift46,Tppp3,Dync1h1,Tppp,Nde1,Fgfr1op,Arl2,Sass6,Stmn1,Prkcz,Cryab,Map4,Spef2,Cep72,Trim36,Bicd2,AK129341,Dicer1,Slc16a1,Dync1li2,Ttll5,Slk,Ccdc187,Map7d1,Dlg1,Map6,Cenpj,Stmn4,Plk3,Apc,Tacc1,Arhgef10,Cntn2,Map1a,Srgap2,Dst,Tbc1d32,Cnp,Ccp110,Kif24,Eml1,Ptk2,Cdc42bpa,Map7,Ccdc13
GO:0006928	movement of cell or subcellular component	103	1044	0.14	0.0435	1.36151	10090.ENSMUSP00000000127,10090.ENSMUSP00000000641,10090.ENSMUSP00000001479,10090.ENSMUSP00000001592,10090.ENSMUSP00000002099,10090.ENSMUSP00000002603,10090.ENSMUSP00000004036,10090.ENSMUSP00000005066,10090.ENSMUSP00000005406,10090.ENSMUSP00000016172,10090.ENSMUSP00000018851,10090.ENSMUSP00000019791,10090.ENSMUSP00000020106,10090.ENSMUSP00000020343,10090.ENSMUSP00000020999,10090.ENSMUSP00000021028…	Wnt3,Sema4f,Kpnb1,Jup,Ift46,Scrib,Efnb3,Map2k1,App,Celsr1,Dync1h1,Sema6a,Arid5b,Rab21,Kif3c,Itgb3,Ptch1,Plau,Spata13,Arc,Nde1,Epha4,Kif5c,Tyro3,Fam83d,Neurog2,Cdk5,Prkcz,Kctd13,Pak1,Plat,Jam3,Pvrl1,Fez1,Myo1e,Dapk2,Map4,Spef2,Myo6,Kcnj2,Myo1d,Foxj1,Bicd2,Shtn1,Spns2,Dync1li2,Anln,Pak7,Ick,Coro7,Ttll5,Cacna2d1,Lpar1,Fut8,Sorl1,Depdc1b,Kif1b,Map6,Actn4,Mobp,Tubb3,Lrrc16a,Cxcl12,Abl1,Megf10,Unc5b,Ap…
GO:0019751	polyol metabolic process	15	77	0.44	0.0447	1.34969	10090.ENSMUSP00000015950,10090.ENSMUSP00000020217,10090.ENSMUSP00000021424,10090.ENSMUSP00000021817,10090.ENSMUSP00000021920,10090.ENSMUSP00000027356,10090.ENSMUSP00000034396,10090.ENSMUSP00000046027,10090.ENSMUSP00000072615,10090.ENSMUSP00000079164,10090.ENSMUSP00000093830,10090.ENSMUSP00000108237,10090.ENSMUSP00000108466,10090.ENSMUSP00000109608,10090.ENSMUSP00000112717	Qdpr,Nudt4,Sptlc2,Ippk,Sptlc1,Cyp27a1,Mtmr2,Itpk1,Sphk2,Synj2,Asah2,Gpd2,Ppip5k2,Slc5a3,Gk5
GO:0007411	axon guidance	23	149	0.34	0.0452	1.34486	10090.ENSMUSP00000000127,10090.ENSMUSP00000000641,10090.ENSMUSP00000004036,10090.ENSMUSP00000005406,10090.ENSMUSP00000019791,10090.ENSMUSP00000021921,10090.ENSMUSP00000027451,10090.ENSMUSP00000028102,10090.ENSMUSP00000029587,10090.ENSMUSP00000030814,10090.ENSMUSP00000034510,10090.ENSMUSP00000034630,10090.ENSMUSP00000071134,10090.ENSMUSP00000072800,10090.ENSMUSP00000077080,10090.ENSMUSP00000083707…	Wnt3,Sema4f,Efnb3,App,Sema6a,Ptch1,Epha4,Kif5c,Neurog2,Cdk5,Pvrl1,Fez1,Tubb3,Cxcl12,Unc5b,Cntn2,Ank3,Lama2,Nfasc,Kif5a,Unc5c,Klf7,Apbb2
GO:0006895	Golgi to endosome transport	6	13	0.81	0.0461	1.3363	10090.ENSMUSP00000048489,10090.ENSMUSP00000068487,10090.ENSMUSP00000073462,10090.ENSMUSP00000099349,10090.ENSMUSP00000099692,10090.ENSMUSP00000107238	Coro7,Tgoln1,Mon2,Wipi1,Sort1,Klhl20
GO:0046337	phosphatidylethanolamine metabolic process	6	13	0.81	0.0461	1.3363	10090.ENSMUSP00000026129,10090.ENSMUSP00000032413,10090.ENSMUSP00000054458,10090.ENSMUSP00000065743,10090.ENSMUSP00000114272,10090.ENSMUSP00000118368	Pcyt2,Etnk1,Napepld,Cept1,Etnk2,Ept1

## Sheet: OPC_upregulated
#term ID	term description	observed gene count	background gene count	strength	false discovery rate	-LOG10(FDR)	matching proteins in your network (IDs)	matching proteins in your network (labels)
GO:0098970	postsynaptic neurotransmitter receptor diffusion trapping	2	4	2.17	0.0039	2.40894	10090.ENSMUSP00000019290,10090.ENSMUSP00000099952	Cacng2,Camk2a
GO:0097107	postsynaptic density assembly	2	5	2.07	0.005	2.30103	10090.ENSMUSP00000104932,10090.ENSMUSP00000124052	Shank3,Reln
GO:2000969	positive regulation of AMPA receptor activity	3	8	2.04	0.00027	3.56864	10090.ENSMUSP00000019290,10090.ENSMUSP00000104932,10090.ENSMUSP00000124052	Cacng2,Shank3,Reln
GO:0097114	NMDA glutamate receptor clustering	2	6	1.99	0.0057	2.24413	10090.ENSMUSP00000104932,10090.ENSMUSP00000124052	Shank3,Reln
GO:2000822	regulation of behavioral fear response	2	7	1.92	0.0068	2.16749	10090.ENSMUSP00000064536,10090.ENSMUSP00000104932	Gja1,Shank3
GO:0007196	adenylate cyclase-inhibiting G protein-coupled glutamate receptor signaling pathway	2	9	1.81	0.0091	2.04096	10090.ENSMUSP00000004076,10090.ENSMUSP00000037255	Grm3,Grm1
GO:0051001	negative regulation of nitric-oxide synthase activity	2	9	1.81	0.0091	2.04096	10090.ENSMUSP00000055797,10090.ENSMUSP00000119242	Cnr1,Atp2b4
GO:0051938	L-glutamate import	2	9	1.81	0.0091	2.04096	10090.ENSMUSP00000079100,10090.ENSMUSP00000082489	Slc1a2,Slc17a7
GO:0060080	inhibitory postsynaptic potential	2	12	1.69	0.0126	1.89963	10090.ENSMUSP00000034230,10090.ENSMUSP00000101060	Cx3cl1,Adora2a
GO:0014049	positive regulation of glutamate secretion	2	13	1.65	0.014	1.85387	10090.ENSMUSP00000025110,10090.ENSMUSP00000101060	Syt4,Adora2a
GO:1900273	positive regulation of long-term synaptic potentiation	3	22	1.6	0.0021	2.67778	10090.ENSMUSP00000101060,10090.ENSMUSP00000104932,10090.ENSMUSP00000124052	Adora2a,Shank3,Reln
GO:0007214	gamma-aminobutyric acid signaling pathway	3	23	1.58	0.0023	2.63827	10090.ENSMUSP00000020707,10090.ENSMUSP00000063276,10090.ENSMUSP00000067632	Gabra1,Gabra5,Gabrg3
GO:0060307	regulation of ventricular cardiac muscle cell membrane repolarization	2	16	1.56	0.0185	1.73283	10090.ENSMUSP00000062507,10090.ENSMUSP00000064536	Scn4b,Gja1
GO:0033604	negative regulation of catecholamine secretion	2	17	1.54	0.0201	1.6968	10090.ENSMUSP00000025110,10090.ENSMUSP00000055797	Syt4,Cnr1
GO:0035249	synaptic transmission, glutamatergic	3	27	1.51	0.0035	2.45593	10090.ENSMUSP00000004076,10090.ENSMUSP00000082489,10090.ENSMUSP00000101060	Grm3,Slc17a7,Adora2a
GO:0048172	regulation of short-term neuronal synaptic plasticity	2	18	1.51	0.0214	1.66959	10090.ENSMUSP00000025110,10090.ENSMUSP00000069429	Syt4,Syp
GO:0097120	receptor localization to synapse	3	28	1.5	0.0037	2.4318	10090.ENSMUSP00000019290,10090.ENSMUSP00000099952,10090.ENSMUSP00000124052	Cacng2,Camk2a,Reln
GO:0051968	positive regulation of synaptic transmission, glutamatergic	3	29	1.48	0.0039	2.40894	10090.ENSMUSP00000101060,10090.ENSMUSP00000104932,10090.ENSMUSP00000124052	Adora2a,Shank3,Reln
GO:0051966	regulation of synaptic transmission, glutamatergic	6	63	1.45	1.17e-05	4.93181	10090.ENSMUSP00000004076,10090.ENSMUSP00000037255,10090.ENSMUSP00000055797,10090.ENSMUSP00000101060,10090.ENSMUSP00000104932,10090.ENSMUSP00000124052	Grm3,Grm1,Cnr1,Adora2a,Shank3,Reln
GO:0046697	decidualization	2	23	1.41	0.0317	1.49894	10090.ENSMUSP00000064536,10090.ENSMUSP00000064680	Gja1,Junb
GO:0048169	regulation of long-term neuronal synaptic plasticity	3	35	1.4	0.0055	2.25964	10090.ENSMUSP00000069429,10090.ENSMUSP00000080038,10090.ENSMUSP00000104932	Syp,Syngap1,Shank3
GO:0060004	reflex	2	24	1.39	0.0337	1.47237	10090.ENSMUSP00000019290,10090.ENSMUSP00000064536	Cacng2,Gja1
GO:0007616	long-term memory	3	37	1.38	0.006	2.22185	10090.ENSMUSP00000020706,10090.ENSMUSP00000082489,10090.ENSMUSP00000124052	Adcy1,Slc17a7,Reln
GO:0014059	regulation of dopamine secretion	2	25	1.37	0.0349	1.45717	10090.ENSMUSP00000025110,10090.ENSMUSP00000055797	Syt4,Cnr1
GO:0035813	regulation of renal sodium excretion	2	25	1.37	0.0349	1.45717	10090.ENSMUSP00000101060,10090.ENSMUSP00000103015	Adora2a,Anpep
GO:0048168	regulation of neuronal synaptic plasticity	5	65	1.35	0.00019	3.72125	10090.ENSMUSP00000025110,10090.ENSMUSP00000069429,10090.ENSMUSP00000080038,10090.ENSMUSP00000099952,10090.ENSMUSP00000104932	Syt4,Syp,Syngap1,Camk2a,Shank3
GO:0098801	regulation of renal system process	3	39	1.35	0.0066	2.18046	10090.ENSMUSP00000064536,10090.ENSMUSP00000101060,10090.ENSMUSP00000103015	Gja1,Adora2a,Anpep
GO:0045187	regulation of circadian sleep/wake cycle, sleep	2	26	1.35	0.0362	1.44129	10090.ENSMUSP00000015234,10090.ENSMUSP00000101060	Ptgds,Adora2a
GO:0060384	innervation	2	26	1.35	0.0362	1.44129	10090.ENSMUSP00000063276,10090.ENSMUSP00000097874	Gabra5,Prkcg
GO:0061900	glial cell activation	2	26	1.35	0.0362	1.44129	10090.ENSMUSP00000034230,10090.ENSMUSP00000101060	Cx3cl1,Adora2a
GO:0050795	regulation of behavior	6	83	1.33	3.92e-05	4.40671	10090.ENSMUSP00000015234,10090.ENSMUSP00000055797,10090.ENSMUSP00000064536,10090.ENSMUSP00000101060,10090.ENSMUSP00000104932,10090.ENSMUSP00000124052	Ptgds,Cnr1,Gja1,Adora2a,Shank3,Reln
GO:0007215	glutamate receptor signaling pathway	3	42	1.32	0.0078	2.10791	10090.ENSMUSP00000004076,10090.ENSMUSP00000037255,10090.ENSMUSP00000099952	Grm3,Grm1,Camk2a
GO:0099565	chemical synaptic transmission, postsynaptic	5	72	1.31	0.00027	3.56864	10090.ENSMUSP00000020707,10090.ENSMUSP00000034230,10090.ENSMUSP00000037255,10090.ENSMUSP00000082489,10090.ENSMUSP00000101060	Gabra1,Cx3cl1,Grm1,Slc17a7,Adora2a
GO:0050885	neuromuscular process controlling balance	4	60	1.29	0.0018	2.74473	10090.ENSMUSP00000022819,10090.ENSMUSP00000087959,10090.ENSMUSP00000099398,10090.ENSMUSP00000104932	Jph4,Gpr88,Cntnap1,Shank3
GO:0043113	receptor clustering	3	45	1.29	0.0087	2.06048	10090.ENSMUSP00000080038,10090.ENSMUSP00000104932,10090.ENSMUSP00000124052	Syngap1,Shank3,Reln
GO:0086065	cell communication involved in cardiac conduction	2	30	1.29	0.0428	1.36856	10090.ENSMUSP00000062507,10090.ENSMUSP00000064536	Scn4b,Gja1
GO:0043278	response to morphine	2	31	1.28	0.045	1.34679	10090.ENSMUSP00000055797,10090.ENSMUSP00000097874	Cnr1,Prkcg
GO:0048520	positive regulation of behavior	2	31	1.28	0.045	1.34679	10090.ENSMUSP00000064536,10090.ENSMUSP00000101060	Gja1,Adora2a
GO:2000463	positive regulation of excitatory postsynaptic potential	2	31	1.28	0.045	1.34679	10090.ENSMUSP00000104932,10090.ENSMUSP00000124052	Shank3,Reln
GO:0060078	regulation of postsynaptic membrane potential	5	78	1.27	0.00035	3.45593	10090.ENSMUSP00000020707,10090.ENSMUSP00000034230,10090.ENSMUSP00000037255,10090.ENSMUSP00000082489,10090.ENSMUSP00000101060	Gabra1,Cx3cl1,Grm1,Slc17a7,Adora2a
GO:0051930	regulation of sensory perception of pain	3	47	1.27	0.0094	2.02687	10090.ENSMUSP00000004076,10090.ENSMUSP00000037255,10090.ENSMUSP00000054389	Grm3,Grm1,Nov
GO:0050433	regulation of catecholamine secretion	3	50	1.25	0.0105	1.97881	10090.ENSMUSP00000025110,10090.ENSMUSP00000055797,10090.ENSMUSP00000101060	Syt4,Cnr1,Adora2a
GO:0051899	membrane depolarization	3	52	1.23	0.0113	1.94692	10090.ENSMUSP00000019290,10090.ENSMUSP00000062507,10090.ENSMUSP00000101060	Cacng2,Scn4b,Adora2a
GO:0035637	multicellular organismal signaling	5	93	1.2	0.00068	3.16749	10090.ENSMUSP00000019290,10090.ENSMUSP00000062507,10090.ENSMUSP00000064536,10090.ENSMUSP00000087959,10090.ENSMUSP00000099398	Cacng2,Scn4b,Gja1,Gpr88,Cntnap1
GO:0019226	transmission of nerve impulse	3	55	1.2	0.0126	1.89963	10090.ENSMUSP00000019290,10090.ENSMUSP00000087959,10090.ENSMUSP00000099398	Cacng2,Gpr88,Cntnap1
GO:1902476	chloride transmembrane transport	4	76	1.19	0.0037	2.4318	10090.ENSMUSP00000020707,10090.ENSMUSP00000063276,10090.ENSMUSP00000067632,10090.ENSMUSP00000082489	Gabra1,Gabra5,Gabrg3,Slc17a7
GO:0051668	localization within membrane	5	100	1.17	0.0009	3.04576	10090.ENSMUSP00000019290,10090.ENSMUSP00000080038,10090.ENSMUSP00000099952,10090.ENSMUSP00000104932,10090.ENSMUSP00000124052	Cacng2,Syngap1,Camk2a,Shank3,Reln
GO:0060135	maternal process involved in female pregnancy	3	59	1.17	0.0144	1.84164	10090.ENSMUSP00000055797,10090.ENSMUSP00000064536,10090.ENSMUSP00000064680	Cnr1,Gja1,Junb
GO:0046928	regulation of neurotransmitter secretion	3	62	1.15	0.016	1.79588	10090.ENSMUSP00000025110,10090.ENSMUSP00000099952,10090.ENSMUSP00000101060	Syt4,Camk2a,Adora2a
GO:0031644	regulation of neurological system process	6	129	1.13	0.00027	3.56864	10090.ENSMUSP00000004076,10090.ENSMUSP00000019290,10090.ENSMUSP00000037255,10090.ENSMUSP00000054389,10090.ENSMUSP00000104932,10090.ENSMUSP00000124052	Grm3,Cacng2,Grm1,Nov,Shank3,Reln
GO:0099537	trans-synaptic signaling	14	313	1.12	5.28e-09	8.27737	10090.ENSMUSP00000004076,10090.ENSMUSP00000020707,10090.ENSMUSP00000025110,10090.ENSMUSP00000034230,10090.ENSMUSP00000037255,10090.ENSMUSP00000055797,10090.ENSMUSP00000063276,10090.ENSMUSP00000069429,10090.ENSMUSP00000082489,10090.ENSMUSP00000087959,10090.ENSMUSP00000097874,10090.ENSMUSP00000101060,10090.ENSMUSP00000105588,10090.ENSMUSP00000123078	Grm3,Gabra1,Syt4,Cx3cl1,Grm1,Cnr1,Gabra5,Syp,Slc17a7,Gpr88,Prkcg,Adora2a,Sstr4,Dlgap2
GO:0007613	memory	6	133	1.12	0.00031	3.50864	10090.ENSMUSP00000020706,10090.ENSMUSP00000025110,10090.ENSMUSP00000055797,10090.ENSMUSP00000082489,10090.ENSMUSP00000104932,10090.ENSMUSP00000124052	Adcy1,Syt4,Cnr1,Slc17a7,Shank3,Reln
GO:0050905	neuromuscular process	5	112	1.12	0.0014	2.85387	10090.ENSMUSP00000022819,10090.ENSMUSP00000087959,10090.ENSMUSP00000099398,10090.ENSMUSP00000101060,10090.ENSMUSP00000104932	Jph4,Gpr88,Cntnap1,Adora2a,Shank3
GO:2001023	regulation of response to drug	4	90	1.11	0.0055	2.25964	10090.ENSMUSP00000025110,10090.ENSMUSP00000026133,10090.ENSMUSP00000055797,10090.ENSMUSP00000101060	Syt4,Pycr1,Cnr1,Adora2a
GO:0097755	positive regulation of blood vessel diameter	3	69	1.11	0.0201	1.6968	10090.ENSMUSP00000034230,10090.ENSMUSP00000064536,10090.ENSMUSP00000101060	Cx3cl1,Gja1,Adora2a
GO:0007268	chemical synaptic transmission	13	306	1.1	1.41e-08	7.85078	10090.ENSMUSP00000004076,10090.ENSMUSP00000020707,10090.ENSMUSP00000025110,10090.ENSMUSP00000034230,10090.ENSMUSP00000037255,10090.ENSMUSP00000063276,10090.ENSMUSP00000069429,10090.ENSMUSP00000082489,10090.ENSMUSP00000087959,10090.ENSMUSP00000097874,10090.ENSMUSP00000101060,10090.ENSMUSP00000105588,10090.ENSMUSP00000123078	Grm3,Gabra1,Syt4,Cx3cl1,Grm1,Gabra5,Syp,Slc17a7,Gpr88,Prkcg,Adora2a,Sstr4,Dlgap2
GO:0048167	regulation of synaptic plasticity	8	188	1.1	2.35e-05	4.62893	10090.ENSMUSP00000022819,10090.ENSMUSP00000025110,10090.ENSMUSP00000069429,10090.ENSMUSP00000080038,10090.ENSMUSP00000099952,10090.ENSMUSP00000101060,10090.ENSMUSP00000104932,10090.ENSMUSP00000124052	Jph4,Syt4,Syp,Syngap1,Camk2a,Adora2a,Shank3,Reln
GO:0015698	inorganic anion transport	5	120	1.09	0.0018	2.74473	10090.ENSMUSP00000020707,10090.ENSMUSP00000063276,10090.ENSMUSP00000067632,10090.ENSMUSP00000082489,10090.ENSMUSP00000121744	Gabra1,Gabra5,Gabrg3,Slc17a7,Slc4a4
GO:0007611	learning or memory	11	271	1.08	4.27e-07	6.36957	10090.ENSMUSP00000020706,10090.ENSMUSP00000022819,10090.ENSMUSP00000025110,10090.ENSMUSP00000055797,10090.ENSMUSP00000063276,10090.ENSMUSP00000080038,10090.ENSMUSP00000082489,10090.ENSMUSP00000087959,10090.ENSMUSP00000097874,10090.ENSMUSP00000104932,10090.ENSMUSP00000124052	Adcy1,Jph4,Syt4,Cnr1,Gabra5,Syngap1,Slc17a7,Gpr88,Prkcg,Shank3,Reln
GO:0042391	regulation of membrane potential	15	383	1.06	5.28e-09	8.27737	10090.ENSMUSP00000019290,10090.ENSMUSP00000020707,10090.ENSMUSP00000026133,10090.ENSMUSP00000034230,10090.ENSMUSP00000037255,10090.ENSMUSP00000040548,10090.ENSMUSP00000055797,10090.ENSMUSP00000062507,10090.ENSMUSP00000064536,10090.ENSMUSP00000082489,10090.ENSMUSP00000087959,10090.ENSMUSP00000099398,10090.ENSMUSP00000101060,10090.ENSMUSP00000104932,10090.ENSMUSP00000124052	Cacng2,Gabra1,Pycr1,Cx3cl1,Grm1,Kcnh3,Cnr1,Scn4b,Gja1,Slc17a7,Gpr88,Cntnap1,Adora2a,Shank3,Reln
GO:0007612	learning	6	155	1.05	0.00061	3.21467	10090.ENSMUSP00000022819,10090.ENSMUSP00000063276,10090.ENSMUSP00000080038,10090.ENSMUSP00000087959,10090.ENSMUSP00000104932,10090.ENSMUSP00000124052	Jph4,Gabra5,Syngap1,Gpr88,Shank3,Reln
GO:0042752	regulation of circadian rhythm	4	104	1.05	0.0079	2.10237	10090.ENSMUSP00000015234,10090.ENSMUSP00000020706,10090.ENSMUSP00000097874,10090.ENSMUSP00000101060	Ptgds,Adcy1,Prkcg,Adora2a
GO:0016358	dendrite development	4	108	1.04	0.0086	2.0655	10090.ENSMUSP00000080038,10090.ENSMUSP00000099952,10090.ENSMUSP00000104932,10090.ENSMUSP00000124052	Syngap1,Camk2a,Shank3,Reln
GO:0033555	multicellular organismal response to stress	3	84	1.02	0.0317	1.49894	10090.ENSMUSP00000063276,10090.ENSMUSP00000097874,10090.ENSMUSP00000124052	Gabra5,Prkcg,Reln
GO:0007187	G protein-coupled receptor signaling pathway, coupled to cyclic nucleotide second messenger	6	173	1.01	0.00099	3.00436	10090.ENSMUSP00000004076,10090.ENSMUSP00000020706,10090.ENSMUSP00000037255,10090.ENSMUSP00000055797,10090.ENSMUSP00000101060,10090.ENSMUSP00000105588	Grm3,Adcy1,Grm1,Cnr1,Adora2a,Sstr4
GO:0050804	modulation of chemical synaptic transmission	12	351	1	4.32e-07	6.36452	10090.ENSMUSP00000004076,10090.ENSMUSP00000019290,10090.ENSMUSP00000022819,10090.ENSMUSP00000025110,10090.ENSMUSP00000037255,10090.ENSMUSP00000055797,10090.ENSMUSP00000069429,10090.ENSMUSP00000080038,10090.ENSMUSP00000099952,10090.ENSMUSP00000101060,10090.ENSMUSP00000104932,10090.ENSMUSP00000124052	Grm3,Cacng2,Jph4,Syt4,Grm1,Cnr1,Syp,Syngap1,Camk2a,Adora2a,Shank3,Reln
GO:0035725	sodium ion transmembrane transport	4	117	1	0.0103	1.98716	10090.ENSMUSP00000062507,10090.ENSMUSP00000079100,10090.ENSMUSP00000082489,10090.ENSMUSP00000121744	Scn4b,Slc1a2,Slc17a7,Slc4a4
GO:0001508	action potential	3	87	1	0.0337	1.47237	10090.ENSMUSP00000062507,10090.ENSMUSP00000087959,10090.ENSMUSP00000099398	Scn4b,Gpr88,Cntnap1
GO:0001649	osteoblast differentiation	3	88	1	0.0343	1.46471	10090.ENSMUSP00000031278,10090.ENSMUSP00000064536,10090.ENSMUSP00000064680	Bmp3,Gja1,Junb
GO:0019233	sensory perception of pain	3	91	0.99	0.0362	1.44129	10090.ENSMUSP00000004076,10090.ENSMUSP00000037255,10090.ENSMUSP00000055797	Grm3,Grm1,Cnr1
GO:0008306	associative learning	3	92	0.98	0.0362	1.44129	10090.ENSMUSP00000063276,10090.ENSMUSP00000080038,10090.ENSMUSP00000124052	Gabra5,Syngap1,Reln
GO:0007188	adenylate cyclase-modulating G protein-coupled receptor signaling pathway	5	161	0.96	0.005	2.30103	10090.ENSMUSP00000004076,10090.ENSMUSP00000020706,10090.ENSMUSP00000037255,10090.ENSMUSP00000055797,10090.ENSMUSP00000101060	Grm3,Adcy1,Grm1,Cnr1,Adora2a
GO:0099504	synaptic vesicle cycle	3	98	0.95	0.041	1.38722	10090.ENSMUSP00000025110,10090.ENSMUSP00000069429,10090.ENSMUSP00000082489	Syt4,Syp,Slc17a7
GO:0043270	positive regulation of ion transport	7	266	0.89	0.0011	2.95861	10090.ENSMUSP00000019290,10090.ENSMUSP00000025110,10090.ENSMUSP00000062507,10090.ENSMUSP00000099952,10090.ENSMUSP00000101060,10090.ENSMUSP00000104932,10090.ENSMUSP00000124052	Cacng2,Syt4,Scn4b,Camk2a,Adora2a,Shank3,Reln
GO:0007267	cell-cell signaling	18	705	0.87	6.12e-09	8.21325	10090.ENSMUSP00000004076,10090.ENSMUSP00000020707,10090.ENSMUSP00000025110,10090.ENSMUSP00000034230,10090.ENSMUSP00000037255,10090.ENSMUSP00000055797,10090.ENSMUSP00000062507,10090.ENSMUSP00000063276,10090.ENSMUSP00000064536,10090.ENSMUSP00000068529,10090.ENSMUSP00000069429,10090.ENSMUSP00000082489,10090.ENSMUSP00000087959,10090.ENSMUSP00000097874,10090.ENSMUSP00000101060,10090.ENSMUSP00000103015…	Grm3,Gabra1,Syt4,Cx3cl1,Grm1,Cnr1,Scn4b,Gabra5,Gja1,Tgfb1i1,Syp,Slc17a7,Gpr88,Prkcg,Adora2a,Anpep,Sstr4,Dlgap2
GO:0048812	neuron projection morphogenesis	10	407	0.86	8.11e-05	4.09098	10090.ENSMUSP00000020706,10090.ENSMUSP00000025523,10090.ENSMUSP00000052014,10090.ENSMUSP00000052306,10090.ENSMUSP00000064536,10090.ENSMUSP00000099398,10090.ENSMUSP00000099952,10090.ENSMUSP00000101060,10090.ENSMUSP00000104932,10090.ENSMUSP00000124052	Adcy1,Csf1r,Tenm2,D3Bwg0562e,Gja1,Cntnap1,Camk2a,Adora2a,Shank3,Reln
GO:0001505	regulation of neurotransmitter levels	7	284	0.86	0.0016	2.79588	10090.ENSMUSP00000025110,10090.ENSMUSP00000028123,10090.ENSMUSP00000079100,10090.ENSMUSP00000082489,10090.ENSMUSP00000099952,10090.ENSMUSP00000101060,10090.ENSMUSP00000119242	Syt4,Gad2,Slc1a2,Slc17a7,Camk2a,Adora2a,Atp2b4
GO:0043524	negative regulation of neuron apoptotic process	4	160	0.86	0.0237	1.62525	10090.ENSMUSP00000063276,10090.ENSMUSP00000080038,10090.ENSMUSP00000097874,10090.ENSMUSP00000101060	Gabra5,Syngap1,Prkcg,Adora2a
GO:0007626	locomotory behavior	5	209	0.85	0.0105	1.97881	10090.ENSMUSP00000037255,10090.ENSMUSP00000087959,10090.ENSMUSP00000101060,10090.ENSMUSP00000104932,10090.ENSMUSP00000124052	Grm1,Gpr88,Adora2a,Shank3,Reln
GO:0007610	behavior	14	598	0.84	1.4e-06	5.85387	10090.ENSMUSP00000020706,10090.ENSMUSP00000022819,10090.ENSMUSP00000025110,10090.ENSMUSP00000037255,10090.ENSMUSP00000055797,10090.ENSMUSP00000063276,10090.ENSMUSP00000079100,10090.ENSMUSP00000080038,10090.ENSMUSP00000082489,10090.ENSMUSP00000087959,10090.ENSMUSP00000097874,10090.ENSMUSP00000101060,10090.ENSMUSP00000104932,10090.ENSMUSP00000124052	Adcy1,Jph4,Syt4,Grm1,Cnr1,Gabra5,Slc1a2,Syngap1,Slc17a7,Gpr88,Prkcg,Adora2a,Shank3,Reln
GO:0044057	regulation of system process	12	506	0.84	1.17e-05	4.93181	10090.ENSMUSP00000004076,10090.ENSMUSP00000019290,10090.ENSMUSP00000034230,10090.ENSMUSP00000037255,10090.ENSMUSP00000054389,10090.ENSMUSP00000062507,10090.ENSMUSP00000064536,10090.ENSMUSP00000101060,10090.ENSMUSP00000103015,10090.ENSMUSP00000104932,10090.ENSMUSP00000119242,10090.ENSMUSP00000124052	Grm3,Cacng2,Cx3cl1,Grm1,Nov,Scn4b,Gja1,Adora2a,Anpep,Shank3,Atp2b4,Reln
GO:0022898	regulation of transmembrane transporter activity	5	218	0.83	0.012	1.92082	10090.ENSMUSP00000019290,10090.ENSMUSP00000062507,10090.ENSMUSP00000064536,10090.ENSMUSP00000104932,10090.ENSMUSP00000124052	Cacng2,Scn4b,Gja1,Shank3,Reln
GO:0050877	nervous system process	18	803	0.82	2.83e-08	7.54821	10090.ENSMUSP00000004076,10090.ENSMUSP00000019290,10090.ENSMUSP00000020706,10090.ENSMUSP00000020707,10090.ENSMUSP00000022819,10090.ENSMUSP00000025110,10090.ENSMUSP00000034230,10090.ENSMUSP00000037255,10090.ENSMUSP00000055797,10090.ENSMUSP00000063276,10090.ENSMUSP00000080038,10090.ENSMUSP00000082489,10090.ENSMUSP00000087959,10090.ENSMUSP00000097874,10090.ENSMUSP00000099398,10090.ENSMUSP00000101060…	Grm3,Cacng2,Adcy1,Gabra1,Jph4,Syt4,Cx3cl1,Grm1,Cnr1,Gabra5,Syngap1,Slc17a7,Gpr88,Prkcg,Cntnap1,Adora2a,Shank3,Reln
GO:0051048	negative regulation of secretion	5	221	0.82	0.0126	1.89963	10090.ENSMUSP00000025110,10090.ENSMUSP00000034230,10090.ENSMUSP00000054389,10090.ENSMUSP00000055797,10090.ENSMUSP00000103015	Syt4,Cx3cl1,Nov,Cnr1,Anpep
GO:0031175	neuron projection development	13	594	0.81	9.79e-06	5.00922	10090.ENSMUSP00000020706,10090.ENSMUSP00000023057,10090.ENSMUSP00000025523,10090.ENSMUSP00000052014,10090.ENSMUSP00000052306,10090.ENSMUSP00000055797,10090.ENSMUSP00000064536,10090.ENSMUSP00000080038,10090.ENSMUSP00000099398,10090.ENSMUSP00000099952,10090.ENSMUSP00000101060,10090.ENSMUSP00000104932,10090.ENSMUSP00000124052	Adcy1,Nptxr,Csf1r,Tenm2,D3Bwg0562e,Cnr1,Gja1,Syngap1,Cntnap1,Camk2a,Adora2a,Shank3,Reln
GO:0043269	regulation of ion transport	13	597	0.8	9.79e-06	5.00922	10090.ENSMUSP00000019290,10090.ENSMUSP00000022819,10090.ENSMUSP00000022967,10090.ENSMUSP00000025110,10090.ENSMUSP00000040548,10090.ENSMUSP00000055797,10090.ENSMUSP00000062507,10090.ENSMUSP00000064536,10090.ENSMUSP00000094075,10090.ENSMUSP00000099952,10090.ENSMUSP00000101060,10090.ENSMUSP00000104932,10090.ENSMUSP00000124052	Cacng2,Jph4,Kcnv1,Syt4,Kcnh3,Cnr1,Scn4b,Gja1,Kcnj4,Camk2a,Adora2a,Shank3,Reln
GO:0098660	inorganic ion transmembrane transport	12	563	0.8	2.98e-05	4.52578	10090.ENSMUSP00000019290,10090.ENSMUSP00000020707,10090.ENSMUSP00000022967,10090.ENSMUSP00000040548,10090.ENSMUSP00000062507,10090.ENSMUSP00000063276,10090.ENSMUSP00000067632,10090.ENSMUSP00000079100,10090.ENSMUSP00000082489,10090.ENSMUSP00000094075,10090.ENSMUSP00000119242,10090.ENSMUSP00000121744	Cacng2,Gabra1,Kcnv1,Kcnh3,Scn4b,Gabra5,Gabrg3,Slc1a2,Slc17a7,Kcnj4,Atp2b4,Slc4a4
GO:0098656	anion transmembrane transport	6	276	0.8	0.0065	2.18709	10090.ENSMUSP00000020707,10090.ENSMUSP00000063276,10090.ENSMUSP00000067632,10090.ENSMUSP00000079100,10090.ENSMUSP00000082489,10090.ENSMUSP00000121744	Gabra1,Gabra5,Gabrg3,Slc1a2,Slc17a7,Slc4a4
GO:0034764	positive regulation of transmembrane transport	4	189	0.79	0.0362	1.44129	10090.ENSMUSP00000019290,10090.ENSMUSP00000079100,10090.ENSMUSP00000104932,10090.ENSMUSP00000124052	Cacng2,Slc1a2,Shank3,Reln
GO:0015672	monovalent inorganic cation transport	7	342	0.78	0.0039	2.40894	10090.ENSMUSP00000022967,10090.ENSMUSP00000040548,10090.ENSMUSP00000062507,10090.ENSMUSP00000079100,10090.ENSMUSP00000082489,10090.ENSMUSP00000094075,10090.ENSMUSP00000121744	Kcnv1,Kcnh3,Scn4b,Slc1a2,Slc17a7,Kcnj4,Slc4a4
GO:0034765	regulation of ion transmembrane transport	8	398	0.77	0.0018	2.74473	10090.ENSMUSP00000019290,10090.ENSMUSP00000022967,10090.ENSMUSP00000040548,10090.ENSMUSP00000062507,10090.ENSMUSP00000064536,10090.ENSMUSP00000094075,10090.ENSMUSP00000104932,10090.ENSMUSP00000124052	Cacng2,Kcnv1,Kcnh3,Scn4b,Gja1,Kcnj4,Shank3,Reln
GO:0046777	protein autophosphorylation	4	198	0.77	0.041	1.38722	10090.ENSMUSP00000025523,10090.ENSMUSP00000097874,10090.ENSMUSP00000099952,10090.ENSMUSP00000103990	Csf1r,Prkcg,Camk2a,Hipk4
GO:1903531	negative regulation of secretion by cell	4	200	0.77	0.0417	1.37986	10090.ENSMUSP00000025110,10090.ENSMUSP00000034230,10090.ENSMUSP00000054389,10090.ENSMUSP00000055797	Syt4,Cx3cl1,Nov,Cnr1
GO:0007186	G protein-coupled receptor signaling pathway	12	606	0.76	5.93e-05	4.22695	10090.ENSMUSP00000004076,10090.ENSMUSP00000020706,10090.ENSMUSP00000020707,10090.ENSMUSP00000034230,10090.ENSMUSP00000037255,10090.ENSMUSP00000055797,10090.ENSMUSP00000063276,10090.ENSMUSP00000067632,10090.ENSMUSP00000087959,10090.ENSMUSP00000099952,10090.ENSMUSP00000101060,10090.ENSMUSP00000105588	Grm3,Adcy1,Gabra1,Cx3cl1,Grm1,Cnr1,Gabra5,Gabrg3,Gpr88,Camk2a,Adora2a,Sstr4
GO:1905114	cell surface receptor signaling pathway involved in cell-cell signaling	6	306	0.76	0.0094	2.02687	10090.ENSMUSP00000020707,10090.ENSMUSP00000034230,10090.ENSMUSP00000037255,10090.ENSMUSP00000068529,10090.ENSMUSP00000082489,10090.ENSMUSP00000101060	Gabra1,Cx3cl1,Grm1,Tgfb1i1,Slc17a7,Adora2a
GO:0021537	telencephalon development	5	257	0.76	0.0204	1.69037	10090.ENSMUSP00000025523,10090.ENSMUSP00000079100,10090.ENSMUSP00000104932,10090.ENSMUSP00000119242,10090.ENSMUSP00000124052	Csf1r,Slc1a2,Shank3,Atp2b4,Reln
GO:0048666	neuron development	14	727	0.75	1.17e-05	4.93181	10090.ENSMUSP00000020706,10090.ENSMUSP00000023057,10090.ENSMUSP00000025523,10090.ENSMUSP00000052014,10090.ENSMUSP00000052306,10090.ENSMUSP00000055797,10090.ENSMUSP00000063276,10090.ENSMUSP00000064536,10090.ENSMUSP00000080038,10090.ENSMUSP00000099398,10090.ENSMUSP00000099952,10090.ENSMUSP00000101060,10090.ENSMUSP00000104932,10090.ENSMUSP00000124052	Adcy1,Nptxr,Csf1r,Tenm2,D3Bwg0562e,Cnr1,Gabra5,Gja1,Syngap1,Cntnap1,Camk2a,Adora2a,Shank3,Reln
GO:0048667	cell morphogenesis involved in neuron differentiation	7	368	0.75	0.0051	2.29243	10090.ENSMUSP00000020706,10090.ENSMUSP00000025523,10090.ENSMUSP00000052014,10090.ENSMUSP00000052306,10090.ENSMUSP00000099952,10090.ENSMUSP00000104932,10090.ENSMUSP00000124052	Adcy1,Csf1r,Tenm2,D3Bwg0562e,Camk2a,Shank3,Reln
GO:0061564	axon development	6	312	0.75	0.0099	2.00436	10090.ENSMUSP00000020706,10090.ENSMUSP00000025523,10090.ENSMUSP00000052014,10090.ENSMUSP00000052306,10090.ENSMUSP00000055797,10090.ENSMUSP00000124052	Adcy1,Csf1r,Tenm2,D3Bwg0562e,Cnr1,Reln
GO:1903522	regulation of blood circulation	4	208	0.75	0.0455	1.34199	10090.ENSMUSP00000034230,10090.ENSMUSP00000062507,10090.ENSMUSP00000064536,10090.ENSMUSP00000119242	Cx3cl1,Scn4b,Gja1,Atp2b4
GO:0030001	metal ion transport	10	536	0.74	0.00049	3.3098	10090.ENSMUSP00000019290,10090.ENSMUSP00000022967,10090.ENSMUSP00000040548,10090.ENSMUSP00000062507,10090.ENSMUSP00000079100,10090.ENSMUSP00000082489,10090.ENSMUSP00000094075,10090.ENSMUSP00000099952,10090.ENSMUSP00000119242,10090.ENSMUSP00000121744	Cacng2,Kcnv1,Kcnh3,Scn4b,Slc1a2,Slc17a7,Kcnj4,Camk2a,Atp2b4,Slc4a4
GO:0034762	regulation of transmembrane transport	9	482	0.74	0.0011	2.95861	10090.ENSMUSP00000019290,10090.ENSMUSP00000022967,10090.ENSMUSP00000040548,10090.ENSMUSP00000062507,10090.ENSMUSP00000064536,10090.ENSMUSP00000079100,10090.ENSMUSP00000094075,10090.ENSMUSP00000104932,10090.ENSMUSP00000124052	Cacng2,Kcnv1,Kcnh3,Scn4b,Gja1,Slc1a2,Kcnj4,Shank3,Reln
GO:0032412	regulation of ion transmembrane transporter activity	4	211	0.74	0.0472	1.32606	10090.ENSMUSP00000019290,10090.ENSMUSP00000062507,10090.ENSMUSP00000104932,10090.ENSMUSP00000124052	Cacng2,Scn4b,Shank3,Reln
GO:0098662	inorganic cation transmembrane transport	9	495	0.73	0.0014	2.85387	10090.ENSMUSP00000019290,10090.ENSMUSP00000022967,10090.ENSMUSP00000040548,10090.ENSMUSP00000062507,10090.ENSMUSP00000079100,10090.ENSMUSP00000082489,10090.ENSMUSP00000094075,10090.ENSMUSP00000119242,10090.ENSMUSP00000121744	Cacng2,Kcnv1,Kcnh3,Scn4b,Slc1a2,Slc17a7,Kcnj4,Atp2b4,Slc4a4
GO:0050708	regulation of protein secretion	7	398	0.71	0.007	2.1549	10090.ENSMUSP00000025110,10090.ENSMUSP00000025523,10090.ENSMUSP00000034230,10090.ENSMUSP00000054389,10090.ENSMUSP00000055797,10090.ENSMUSP00000064536,10090.ENSMUSP00000101060	Syt4,Csf1r,Cx3cl1,Nov,Cnr1,Gja1,Adora2a
GO:0008015	blood circulation	6	344	0.71	0.014	1.85387	10090.ENSMUSP00000034230,10090.ENSMUSP00000055797,10090.ENSMUSP00000062507,10090.ENSMUSP00000064536,10090.ENSMUSP00000101060,10090.ENSMUSP00000103015	Cx3cl1,Cnr1,Scn4b,Gja1,Adora2a,Anpep
GO:0003008	system process	21	1231	0.7	6.35e-08	7.19723	10090.ENSMUSP00000004076,10090.ENSMUSP00000019290,10090.ENSMUSP00000020706,10090.ENSMUSP00000020707,10090.ENSMUSP00000022819,10090.ENSMUSP00000025110,10090.ENSMUSP00000034230,10090.ENSMUSP00000037255,10090.ENSMUSP00000055797,10090.ENSMUSP00000062507,10090.ENSMUSP00000063276,10090.ENSMUSP00000064536,10090.ENSMUSP00000080038,10090.ENSMUSP00000082489,10090.ENSMUSP00000087959,10090.ENSMUSP00000097874…	Grm3,Cacng2,Adcy1,Gabra1,Jph4,Syt4,Cx3cl1,Grm1,Cnr1,Scn4b,Gabra5,Gja1,Syngap1,Slc17a7,Gpr88,Prkcg,Cntnap1,Adora2a,Anpep,Shank3,Reln
GO:0006820	anion transport	7	408	0.7	0.0079	2.10237	10090.ENSMUSP00000020707,10090.ENSMUSP00000063276,10090.ENSMUSP00000064536,10090.ENSMUSP00000067632,10090.ENSMUSP00000079100,10090.ENSMUSP00000082489,10090.ENSMUSP00000121744	Gabra1,Gabra5,Gja1,Gabrg3,Slc1a2,Slc17a7,Slc4a4
GO:0007409	axonogenesis	5	292	0.7	0.0323	1.4908	10090.ENSMUSP00000020706,10090.ENSMUSP00000025523,10090.ENSMUSP00000052014,10090.ENSMUSP00000052306,10090.ENSMUSP00000124052	Adcy1,Csf1r,Tenm2,D3Bwg0562e,Reln
GO:0030182	neuron differentiation	15	900	0.69	2.03e-05	4.6925	10090.ENSMUSP00000020706,10090.ENSMUSP00000023057,10090.ENSMUSP00000025523,10090.ENSMUSP00000052014,10090.ENSMUSP00000052306,10090.ENSMUSP00000055797,10090.ENSMUSP00000063276,10090.ENSMUSP00000064536,10090.ENSMUSP00000080038,10090.ENSMUSP00000099398,10090.ENSMUSP00000099952,10090.ENSMUSP00000101060,10090.ENSMUSP00000104932,10090.ENSMUSP00000124052,10090.ENSMUSP00000140409	Adcy1,Nptxr,Csf1r,Tenm2,D3Bwg0562e,Cnr1,Gabra5,Gja1,Syngap1,Cntnap1,Camk2a,Adora2a,Shank3,Reln,Spock1
GO:0034220	ion transmembrane transport	13	781	0.69	0.00011	3.95861	10090.ENSMUSP00000019290,10090.ENSMUSP00000020707,10090.ENSMUSP00000022967,10090.ENSMUSP00000040548,10090.ENSMUSP00000062507,10090.ENSMUSP00000063276,10090.ENSMUSP00000064536,10090.ENSMUSP00000067632,10090.ENSMUSP00000079100,10090.ENSMUSP00000082489,10090.ENSMUSP00000094075,10090.ENSMUSP00000119242,10090.ENSMUSP00000121744	Cacng2,Gabra1,Kcnv1,Kcnh3,Scn4b,Gabra5,Gja1,Gabrg3,Slc1a2,Slc17a7,Kcnj4,Atp2b4,Slc4a4
GO:0006935	chemotaxis	6	370	0.68	0.0185	1.73283	10090.ENSMUSP00000025523,10090.ENSMUSP00000034230,10090.ENSMUSP00000052014,10090.ENSMUSP00000054389,10090.ENSMUSP00000124052,10090.ENSMUSP00000138523	Csf1r,Cx3cl1,Tenm2,Nov,Reln,Bin2
GO:0010976	positive regulation of neuron projection development	5	318	0.66	0.0402	1.39577	10090.ENSMUSP00000025110,10090.ENSMUSP00000034230,10090.ENSMUSP00000055797,10090.ENSMUSP00000104932,10090.ENSMUSP00000124052	Syt4,Cx3cl1,Cnr1,Shank3,Reln
GO:0072657	protein localization to membrane	5	319	0.66	0.0406	1.39147	10090.ENSMUSP00000019290,10090.ENSMUSP00000080038,10090.ENSMUSP00000099952,10090.ENSMUSP00000104932,10090.ENSMUSP00000124052	Cacng2,Syngap1,Camk2a,Shank3,Reln
GO:0007417	central nervous system development	12	821	0.63	0.00063	3.20066	10090.ENSMUSP00000020706,10090.ENSMUSP00000025110,10090.ENSMUSP00000025523,10090.ENSMUSP00000063276,10090.ENSMUSP00000079100,10090.ENSMUSP00000082489,10090.ENSMUSP00000099398,10090.ENSMUSP00000101060,10090.ENSMUSP00000104932,10090.ENSMUSP00000119242,10090.ENSMUSP00000124052,10090.ENSMUSP00000140409	Adcy1,Syt4,Csf1r,Gabra5,Slc1a2,Slc17a7,Cntnap1,Adora2a,Shank3,Atp2b4,Reln,Spock1
GO:0031346	positive regulation of cell projection organization	6	408	0.63	0.0274	1.56225	10090.ENSMUSP00000025110,10090.ENSMUSP00000034230,10090.ENSMUSP00000052014,10090.ENSMUSP00000055797,10090.ENSMUSP00000104932,10090.ENSMUSP00000124052	Syt4,Cx3cl1,Tenm2,Cnr1,Shank3,Reln
GO:0010469	regulation of signaling receptor activity	6	419	0.62	0.0307	1.51286	10090.ENSMUSP00000019290,10090.ENSMUSP00000031278,10090.ENSMUSP00000034230,10090.ENSMUSP00000054389,10090.ENSMUSP00000104932,10090.ENSMUSP00000124052	Cacng2,Bmp3,Cx3cl1,Nov,Shank3,Reln
GO:0007420	brain development	9	650	0.61	0.0061	2.21467	10090.ENSMUSP00000020706,10090.ENSMUSP00000025110,10090.ENSMUSP00000025523,10090.ENSMUSP00000063276,10090.ENSMUSP00000079100,10090.ENSMUSP00000082489,10090.ENSMUSP00000104932,10090.ENSMUSP00000119242,10090.ENSMUSP00000124052	Adcy1,Syt4,Csf1r,Gabra5,Slc1a2,Slc17a7,Shank3,Atp2b4,Reln
GO:0006811	ion transport	14	1041	0.6	0.00033	3.48149	10090.ENSMUSP00000019290,10090.ENSMUSP00000020707,10090.ENSMUSP00000022967,10090.ENSMUSP00000040548,10090.ENSMUSP00000062507,10090.ENSMUSP00000063276,10090.ENSMUSP00000064536,10090.ENSMUSP00000067632,10090.ENSMUSP00000079100,10090.ENSMUSP00000082489,10090.ENSMUSP00000094075,10090.ENSMUSP00000099952,10090.ENSMUSP00000119242,10090.ENSMUSP00000121744	Cacng2,Gabra1,Kcnv1,Kcnh3,Scn4b,Gabra5,Gja1,Gabrg3,Slc1a2,Slc17a7,Kcnj4,Camk2a,Atp2b4,Slc4a4
GO:0010975	regulation of neuron projection development	7	520	0.6	0.0205	1.68825	10090.ENSMUSP00000025110,10090.ENSMUSP00000034230,10090.ENSMUSP00000055797,10090.ENSMUSP00000080038,10090.ENSMUSP00000104932,10090.ENSMUSP00000124052,10090.ENSMUSP00000140409	Syt4,Cx3cl1,Cnr1,Syngap1,Shank3,Reln,Spock1
GO:0040011	locomotion	12	952	0.57	0.002	2.69897	10090.ENSMUSP00000025523,10090.ENSMUSP00000029784,10090.ENSMUSP00000034230,10090.ENSMUSP00000052014,10090.ENSMUSP00000054389,10090.ENSMUSP00000064536,10090.ENSMUSP00000104932,10090.ENSMUSP00000105588,10090.ENSMUSP00000119242,10090.ENSMUSP00000124052,10090.ENSMUSP00000138523,10090.ENSMUSP00000140409	Csf1r,Celf3,Cx3cl1,Tenm2,Nov,Gja1,Shank3,Sstr4,Atp2b4,Reln,Bin2,Spock1
GO:0014070	response to organic cyclic compound	10	797	0.57	0.0061	2.21467	10090.ENSMUSP00000015234,10090.ENSMUSP00000020706,10090.ENSMUSP00000020707,10090.ENSMUSP00000055797,10090.ENSMUSP00000064536,10090.ENSMUSP00000064680,10090.ENSMUSP00000097874,10090.ENSMUSP00000101060,10090.ENSMUSP00000105588,10090.ENSMUSP00000119242	Ptgds,Adcy1,Gabra1,Cnr1,Gja1,Junb,Prkcg,Adora2a,Sstr4,Atp2b4
GO:0051046	regulation of secretion	9	716	0.57	0.0099	2.00436	10090.ENSMUSP00000025110,10090.ENSMUSP00000025523,10090.ENSMUSP00000034230,10090.ENSMUSP00000054389,10090.ENSMUSP00000055797,10090.ENSMUSP00000064536,10090.ENSMUSP00000099952,10090.ENSMUSP00000101060,10090.ENSMUSP00000103015	Syt4,Csf1r,Cx3cl1,Nov,Cnr1,Gja1,Camk2a,Adora2a,Anpep
GO:0051049	regulation of transport	20	1629	0.56	1.76e-05	4.75449	10090.ENSMUSP00000019290,10090.ENSMUSP00000022819,10090.ENSMUSP00000022967,10090.ENSMUSP00000025110,10090.ENSMUSP00000025523,10090.ENSMUSP00000034230,10090.ENSMUSP00000040548,10090.ENSMUSP00000054389,10090.ENSMUSP00000055797,10090.ENSMUSP00000062507,10090.ENSMUSP00000064536,10090.ENSMUSP00000079100,10090.ENSMUSP00000082489,10090.ENSMUSP00000094075,10090.ENSMUSP00000097874,10090.ENSMUSP00000099952…	Cacng2,Jph4,Kcnv1,Syt4,Csf1r,Cx3cl1,Kcnh3,Nov,Cnr1,Scn4b,Gja1,Slc1a2,Slc17a7,Kcnj4,Prkcg,Camk2a,Adora2a,Anpep,Shank3,Reln
GO:0031347	regulation of defense response	6	484	0.56	0.0478	1.32057	10090.ENSMUSP00000034230,10090.ENSMUSP00000054389,10090.ENSMUSP00000055797,10090.ENSMUSP00000064536,10090.ENSMUSP00000101060,10090.ENSMUSP00000104932	Cx3cl1,Nov,Cnr1,Gja1,Adora2a,Shank3
GO:0120035	regulation of plasma membrane bounded cell projection organization	8	667	0.55	0.0202	1.69465	10090.ENSMUSP00000025110,10090.ENSMUSP00000034230,10090.ENSMUSP00000052014,10090.ENSMUSP00000055797,10090.ENSMUSP00000080038,10090.ENSMUSP00000104932,10090.ENSMUSP00000124052,10090.ENSMUSP00000140409	Syt4,Cx3cl1,Tenm2,Cnr1,Syngap1,Shank3,Reln,Spock1
GO:0048699	generation of neurons	17	1426	0.54	0.00017	3.76955	10090.ENSMUSP00000020706,10090.ENSMUSP00000023057,10090.ENSMUSP00000025110,10090.ENSMUSP00000025523,10090.ENSMUSP00000034230,10090.ENSMUSP00000052014,10090.ENSMUSP00000052306,10090.ENSMUSP00000055797,10090.ENSMUSP00000063276,10090.ENSMUSP00000064536,10090.ENSMUSP00000080038,10090.ENSMUSP00000099398,10090.ENSMUSP00000099952,10090.ENSMUSP00000101060,10090.ENSMUSP00000104932,10090.ENSMUSP00000124052…	Adcy1,Nptxr,Syt4,Csf1r,Cx3cl1,Tenm2,D3Bwg0562e,Cnr1,Gabra5,Gja1,Syngap1,Cntnap1,Camk2a,Adora2a,Shank3,Reln,Spock1
GO:0042493	response to drug	10	844	0.54	0.0083	2.08092	10090.ENSMUSP00000020706,10090.ENSMUSP00000028123,10090.ENSMUSP00000055797,10090.ENSMUSP00000064536,10090.ENSMUSP00000064680,10090.ENSMUSP00000067632,10090.ENSMUSP00000079100,10090.ENSMUSP00000082489,10090.ENSMUSP00000097874,10090.ENSMUSP00000101060	Adcy1,Gad2,Cnr1,Gja1,Junb,Gabrg3,Slc1a2,Slc17a7,Prkcg,Adora2a
GO:0048870	cell motility	9	767	0.54	0.0138	1.86012	10090.ENSMUSP00000029784,10090.ENSMUSP00000034230,10090.ENSMUSP00000054389,10090.ENSMUSP00000064536,10090.ENSMUSP00000105588,10090.ENSMUSP00000119242,10090.ENSMUSP00000124052,10090.ENSMUSP00000138523,10090.ENSMUSP00000140409	Celf3,Cx3cl1,Nov,Gja1,Sstr4,Atp2b4,Reln,Bin2,Spock1
GO:1903530	regulation of secretion by cell	8	669	0.54	0.0204	1.69037	10090.ENSMUSP00000025110,10090.ENSMUSP00000025523,10090.ENSMUSP00000034230,10090.ENSMUSP00000054389,10090.ENSMUSP00000055797,10090.ENSMUSP00000064536,10090.ENSMUSP00000099952,10090.ENSMUSP00000101060	Syt4,Csf1r,Cx3cl1,Nov,Cnr1,Gja1,Camk2a,Adora2a
GO:0032880	regulation of protein localization	10	885	0.52	0.0105	1.97881	10090.ENSMUSP00000019290,10090.ENSMUSP00000025110,10090.ENSMUSP00000025523,10090.ENSMUSP00000034230,10090.ENSMUSP00000054389,10090.ENSMUSP00000055797,10090.ENSMUSP00000064536,10090.ENSMUSP00000099952,10090.ENSMUSP00000101060,10090.ENSMUSP00000104932	Cacng2,Syt4,Csf1r,Cx3cl1,Nov,Cnr1,Gja1,Camk2a,Adora2a,Shank3
GO:0010243	response to organonitrogen compound	9	794	0.52	0.0163	1.78781	10090.ENSMUSP00000020707,10090.ENSMUSP00000055797,10090.ENSMUSP00000064536,10090.ENSMUSP00000064680,10090.ENSMUSP00000079100,10090.ENSMUSP00000097874,10090.ENSMUSP00000099952,10090.ENSMUSP00000101060,10090.ENSMUSP00000119242	Gabra1,Cnr1,Gja1,Junb,Slc1a2,Prkcg,Camk2a,Adora2a,Atp2b4
GO:0051050	positive regulation of transport	10	897	0.51	0.0113	1.94692	10090.ENSMUSP00000019290,10090.ENSMUSP00000025110,10090.ENSMUSP00000025523,10090.ENSMUSP00000062507,10090.ENSMUSP00000064536,10090.ENSMUSP00000079100,10090.ENSMUSP00000099952,10090.ENSMUSP00000101060,10090.ENSMUSP00000104932,10090.ENSMUSP00000124052	Cacng2,Syt4,Csf1r,Scn4b,Gja1,Slc1a2,Camk2a,Adora2a,Shank3,Reln
GO:0006928	movement of cell or subcellular component	12	1107	0.5	0.0057	2.24413	10090.ENSMUSP00000025523,10090.ENSMUSP00000029784,10090.ENSMUSP00000034230,10090.ENSMUSP00000052014,10090.ENSMUSP00000054389,10090.ENSMUSP00000062507,10090.ENSMUSP00000064536,10090.ENSMUSP00000105588,10090.ENSMUSP00000119242,10090.ENSMUSP00000124052,10090.ENSMUSP00000138523,10090.ENSMUSP00000140409	Csf1r,Celf3,Cx3cl1,Tenm2,Nov,Scn4b,Gja1,Sstr4,Atp2b4,Reln,Bin2,Spock1
GO:0048468	cell development	15	1432	0.49	0.0018	2.74473	10090.ENSMUSP00000020706,10090.ENSMUSP00000023057,10090.ENSMUSP00000025523,10090.ENSMUSP00000031278,10090.ENSMUSP00000052014,10090.ENSMUSP00000052306,10090.ENSMUSP00000055797,10090.ENSMUSP00000063276,10090.ENSMUSP00000064536,10090.ENSMUSP00000080038,10090.ENSMUSP00000099398,10090.ENSMUSP00000099952,10090.ENSMUSP00000101060,10090.ENSMUSP00000104932,10090.ENSMUSP00000124052	Adcy1,Nptxr,Csf1r,Bmp3,Tenm2,D3Bwg0562e,Cnr1,Gabra5,Gja1,Syngap1,Cntnap1,Camk2a,Adora2a,Shank3,Reln
GO:0007399	nervous system development	21	2021	0.48	8.73e-05	4.05899	10090.ENSMUSP00000020706,10090.ENSMUSP00000023057,10090.ENSMUSP00000025110,10090.ENSMUSP00000025523,10090.ENSMUSP00000034230,10090.ENSMUSP00000052014,10090.ENSMUSP00000052306,10090.ENSMUSP00000055797,10090.ENSMUSP00000063276,10090.ENSMUSP00000064536,10090.ENSMUSP00000079100,10090.ENSMUSP00000080038,10090.ENSMUSP00000082489,10090.ENSMUSP00000097874,10090.ENSMUSP00000099398,10090.ENSMUSP00000099952…	Adcy1,Nptxr,Syt4,Csf1r,Cx3cl1,Tenm2,D3Bwg0562e,Cnr1,Gabra5,Gja1,Slc1a2,Syngap1,Slc17a7,Prkcg,Cntnap1,Camk2a,Adora2a,Shank3,Atp2b4,Reln,Spock1
GO:0007154	cell communication	33	3538	0.44	3.33e-07	6.47756	10090.ENSMUSP00000004076,10090.ENSMUSP00000019290,10090.ENSMUSP00000020706,10090.ENSMUSP00000020707,10090.ENSMUSP00000023057,10090.ENSMUSP00000025110,10090.ENSMUSP00000025523,10090.ENSMUSP00000031278,10090.ENSMUSP00000034230,10090.ENSMUSP00000037255,10090.ENSMUSP00000040548,10090.ENSMUSP00000052014,10090.ENSMUSP00000052306,10090.ENSMUSP00000055797,10090.ENSMUSP00000062507,10090.ENSMUSP00000063276…	Grm3,Cacng2,Adcy1,Gabra1,Nptxr,Syt4,Csf1r,Bmp3,Cx3cl1,Grm1,Kcnh3,Tenm2,D3Bwg0562e,Cnr1,Scn4b,Gabra5,Gja1,Gabrg3,Tgfb1i1,Syp,Slc1a2,Syngap1,Slc17a7,Gpr88,Prkcg,Cntnap1,Camk2a,Adora2a,Anpep,Shank3,Sstr4,Dlgap2,Reln
GO:0023052	signaling	32	3418	0.44	4.79e-07	6.31966	10090.ENSMUSP00000004076,10090.ENSMUSP00000019290,10090.ENSMUSP00000020706,10090.ENSMUSP00000020707,10090.ENSMUSP00000023057,10090.ENSMUSP00000025110,10090.ENSMUSP00000025523,10090.ENSMUSP00000031278,10090.ENSMUSP00000034230,10090.ENSMUSP00000037255,10090.ENSMUSP00000040548,10090.ENSMUSP00000052014,10090.ENSMUSP00000052306,10090.ENSMUSP00000055797,10090.ENSMUSP00000062507,10090.ENSMUSP00000063276…	Grm3,Cacng2,Adcy1,Gabra1,Nptxr,Syt4,Csf1r,Bmp3,Cx3cl1,Grm1,Kcnh3,Tenm2,D3Bwg0562e,Cnr1,Scn4b,Gabra5,Gja1,Gabrg3,Tgfb1i1,Syp,Syngap1,Slc17a7,Gpr88,Prkcg,Cntnap1,Camk2a,Adora2a,Anpep,Shank3,Sstr4,Dlgap2,Reln
GO:0065008	regulation of biological quality	29	3116	0.44	4.68e-06	5.32975	10090.ENSMUSP00000019290,10090.ENSMUSP00000020707,10090.ENSMUSP00000022819,10090.ENSMUSP00000025110,10090.ENSMUSP00000025523,10090.ENSMUSP00000026133,10090.ENSMUSP00000028123,10090.ENSMUSP00000034230,10090.ENSMUSP00000036710,10090.ENSMUSP00000037255,10090.ENSMUSP00000040548,10090.ENSMUSP00000054389,10090.ENSMUSP00000055797,10090.ENSMUSP00000062507,10090.ENSMUSP00000064536,10090.ENSMUSP00000069429…	Cacng2,Gabra1,Jph4,Syt4,Csf1r,Pycr1,Gad2,Cx3cl1,Lars2,Grm1,Kcnh3,Nov,Cnr1,Scn4b,Gja1,Syp,Slc1a2,Syngap1,Slc17a7,Gpr88,Cntnap1,Camk2a,Adora2a,Anpep,Shank3,Atp2b4,Slc4a4,Reln,Mest
GO:0045597	positive regulation of cell differentiation	9	962	0.44	0.0421	1.37572	10090.ENSMUSP00000025110,10090.ENSMUSP00000025523,10090.ENSMUSP00000034230,10090.ENSMUSP00000055797,10090.ENSMUSP00000064536,10090.ENSMUSP00000064680,10090.ENSMUSP00000068529,10090.ENSMUSP00000104932,10090.ENSMUSP00000124052	Syt4,Csf1r,Cx3cl1,Cnr1,Gja1,Junb,Tgfb1i1,Shank3,Reln
GO:0032879	regulation of localization	21	2361	0.42	0.00061	3.21467	10090.ENSMUSP00000019290,10090.ENSMUSP00000022819,10090.ENSMUSP00000022967,10090.ENSMUSP00000025110,10090.ENSMUSP00000025523,10090.ENSMUSP00000034230,10090.ENSMUSP00000040548,10090.ENSMUSP00000054389,10090.ENSMUSP00000055797,10090.ENSMUSP00000062507,10090.ENSMUSP00000064536,10090.ENSMUSP00000079100,10090.ENSMUSP00000082489,10090.ENSMUSP00000094075,10090.ENSMUSP00000097874,10090.ENSMUSP00000099952…	Cacng2,Jph4,Kcnv1,Syt4,Csf1r,Cx3cl1,Kcnh3,Nov,Cnr1,Scn4b,Gja1,Slc1a2,Slc17a7,Kcnj4,Prkcg,Camk2a,Adora2a,Anpep,Shank3,Reln,Mest
GO:0042221	response to chemical	26	3071	0.39	0.00012	3.92082	10090.ENSMUSP00000015234,10090.ENSMUSP00000019290,10090.ENSMUSP00000020706,10090.ENSMUSP00000020707,10090.ENSMUSP00000025523,10090.ENSMUSP00000026133,10090.ENSMUSP00000028123,10090.ENSMUSP00000031278,10090.ENSMUSP00000034230,10090.ENSMUSP00000052014,10090.ENSMUSP00000054389,10090.ENSMUSP00000055797,10090.ENSMUSP00000064536,10090.ENSMUSP00000064680,10090.ENSMUSP00000067632,10090.ENSMUSP00000069429…	Ptgds,Cacng2,Adcy1,Gabra1,Csf1r,Pycr1,Gad2,Bmp3,Cx3cl1,Tenm2,Nov,Cnr1,Gja1,Junb,Gabrg3,Syp,Slc1a2,Slc17a7,Prkcg,Camk2a,Adora2a,Sstr4,Atp2b4,Reln,Mest,Bin2
GO:0009967	positive regulation of signal transduction	11	1322	0.39	0.04	1.39794	10090.ENSMUSP00000019290,10090.ENSMUSP00000025523,10090.ENSMUSP00000031278,10090.ENSMUSP00000034230,10090.ENSMUSP00000037255,10090.ENSMUSP00000054389,10090.ENSMUSP00000068529,10090.ENSMUSP00000101060,10090.ENSMUSP00000104932,10090.ENSMUSP00000105588,10090.ENSMUSP00000124052	Cacng2,Csf1r,Bmp3,Cx3cl1,Grm1,Nov,Tgfb1i1,Adora2a,Shank3,Sstr4,Reln
GO:0007165	signal transduction	26	3167	0.38	0.00019	3.72125	10090.ENSMUSP00000004076,10090.ENSMUSP00000020706,10090.ENSMUSP00000020707,10090.ENSMUSP00000023057,10090.ENSMUSP00000025523,10090.ENSMUSP00000031278,10090.ENSMUSP00000034230,10090.ENSMUSP00000037255,10090.ENSMUSP00000040548,10090.ENSMUSP00000052014,10090.ENSMUSP00000052306,10090.ENSMUSP00000055797,10090.ENSMUSP00000063276,10090.ENSMUSP00000064536,10090.ENSMUSP00000067632,10090.ENSMUSP00000068529…	Grm3,Adcy1,Gabra1,Nptxr,Csf1r,Bmp3,Cx3cl1,Grm1,Kcnh3,Tenm2,D3Bwg0562e,Cnr1,Gabra5,Gja1,Gabrg3,Tgfb1i1,Syngap1,Slc17a7,Gpr88,Prkcg,Camk2a,Adora2a,Anpep,Shank3,Sstr4,Reln
GO:0010647	positive regulation of cell communication	12	1481	0.38	0.0349	1.45717	10090.ENSMUSP00000019290,10090.ENSMUSP00000025523,10090.ENSMUSP00000031278,10090.ENSMUSP00000034230,10090.ENSMUSP00000037255,10090.ENSMUSP00000054389,10090.ENSMUSP00000064536,10090.ENSMUSP00000068529,10090.ENSMUSP00000101060,10090.ENSMUSP00000104932,10090.ENSMUSP00000105588,10090.ENSMUSP00000124052	Cacng2,Csf1r,Bmp3,Cx3cl1,Grm1,Nov,Gja1,Tgfb1i1,Adora2a,Shank3,Sstr4,Reln
GO:0009653	anatomical structure morphogenesis	15	1894	0.37	0.0158	1.80134	10090.ENSMUSP00000020706,10090.ENSMUSP00000025523,10090.ENSMUSP00000034230,10090.ENSMUSP00000052014,10090.ENSMUSP00000052306,10090.ENSMUSP00000054389,10090.ENSMUSP00000064536,10090.ENSMUSP00000064680,10090.ENSMUSP00000068529,10090.ENSMUSP00000099398,10090.ENSMUSP00000099952,10090.ENSMUSP00000101060,10090.ENSMUSP00000103015,10090.ENSMUSP00000104932,10090.ENSMUSP00000124052	Adcy1,Csf1r,Cx3cl1,Tenm2,D3Bwg0562e,Nov,Gja1,Junb,Tgfb1i1,Cntnap1,Camk2a,Adora2a,Anpep,Shank3,Reln
GO:0048584	positive regulation of response to stimulus	14	1747	0.37	0.0201	1.6968	10090.ENSMUSP00000019290,10090.ENSMUSP00000025523,10090.ENSMUSP00000031278,10090.ENSMUSP00000034230,10090.ENSMUSP00000037255,10090.ENSMUSP00000054389,10090.ENSMUSP00000055797,10090.ENSMUSP00000064536,10090.ENSMUSP00000068529,10090.ENSMUSP00000097874,10090.ENSMUSP00000101060,10090.ENSMUSP00000104932,10090.ENSMUSP00000105588,10090.ENSMUSP00000124052	Cacng2,Csf1r,Bmp3,Cx3cl1,Grm1,Nov,Cnr1,Gja1,Tgfb1i1,Prkcg,Adora2a,Shank3,Sstr4,Reln
GO:0023056	positive regulation of signaling	12	1489	0.37	0.0362	1.44129	10090.ENSMUSP00000019290,10090.ENSMUSP00000025523,10090.ENSMUSP00000031278,10090.ENSMUSP00000034230,10090.ENSMUSP00000037255,10090.ENSMUSP00000054389,10090.ENSMUSP00000064536,10090.ENSMUSP00000068529,10090.ENSMUSP00000101060,10090.ENSMUSP00000104932,10090.ENSMUSP00000105588,10090.ENSMUSP00000124052	Cacng2,Csf1r,Bmp3,Cx3cl1,Grm1,Nov,Gja1,Tgfb1i1,Adora2a,Shank3,Sstr4,Reln
GO:0010941	regulation of cell death	12	1513	0.37	0.039	1.40894	10090.ENSMUSP00000025523,10090.ENSMUSP00000026133,10090.ENSMUSP00000031278,10090.ENSMUSP00000034230,10090.ENSMUSP00000054389,10090.ENSMUSP00000055797,10090.ENSMUSP00000063276,10090.ENSMUSP00000064680,10090.ENSMUSP00000080038,10090.ENSMUSP00000097874,10090.ENSMUSP00000099952,10090.ENSMUSP00000101060	Csf1r,Pycr1,Bmp3,Cx3cl1,Nov,Cnr1,Gabra5,Junb,Syngap1,Prkcg,Camk2a,Adora2a
GO:0051239	regulation of multicellular organismal process	20	2615	0.35	0.005	2.30103	10090.ENSMUSP00000004076,10090.ENSMUSP00000015234,10090.ENSMUSP00000019290,10090.ENSMUSP00000022819,10090.ENSMUSP00000025110,10090.ENSMUSP00000025523,10090.ENSMUSP00000034230,10090.ENSMUSP00000037255,10090.ENSMUSP00000054389,10090.ENSMUSP00000055797,10090.ENSMUSP00000062507,10090.ENSMUSP00000064536,10090.ENSMUSP00000068529,10090.ENSMUSP00000080038,10090.ENSMUSP00000101060,10090.ENSMUSP00000103015…	Grm3,Ptgds,Cacng2,Jph4,Syt4,Csf1r,Cx3cl1,Grm1,Nov,Cnr1,Scn4b,Gja1,Tgfb1i1,Syngap1,Adora2a,Anpep,Shank3,Atp2b4,Reln,Spock1
GO:0010646	regulation of cell communication	21	2839	0.34	0.0051	2.29243	10090.ENSMUSP00000004076,10090.ENSMUSP00000019290,10090.ENSMUSP00000022819,10090.ENSMUSP00000025110,10090.ENSMUSP00000025523,10090.ENSMUSP00000031278,10090.ENSMUSP00000034230,10090.ENSMUSP00000037255,10090.ENSMUSP00000054389,10090.ENSMUSP00000055797,10090.ENSMUSP00000064536,10090.ENSMUSP00000068529,10090.ENSMUSP00000069429,10090.ENSMUSP00000080038,10090.ENSMUSP00000099952,10090.ENSMUSP00000101060…	Grm3,Cacng2,Jph4,Syt4,Csf1r,Bmp3,Cx3cl1,Grm1,Nov,Cnr1,Gja1,Tgfb1i1,Syp,Syngap1,Camk2a,Adora2a,Hipk4,Shank3,Sstr4,Atp2b4,Reln
GO:0010033	response to organic substance	17	2290	0.34	0.0145	1.83863	10090.ENSMUSP00000015234,10090.ENSMUSP00000020706,10090.ENSMUSP00000020707,10090.ENSMUSP00000025523,10090.ENSMUSP00000031278,10090.ENSMUSP00000034230,10090.ENSMUSP00000055797,10090.ENSMUSP00000064536,10090.ENSMUSP00000064680,10090.ENSMUSP00000069429,10090.ENSMUSP00000079100,10090.ENSMUSP00000097874,10090.ENSMUSP00000099952,10090.ENSMUSP00000101060,10090.ENSMUSP00000105588,10090.ENSMUSP00000119242…	Ptgds,Adcy1,Gabra1,Csf1r,Bmp3,Cx3cl1,Cnr1,Gja1,Junb,Syp,Slc1a2,Prkcg,Camk2a,Adora2a,Sstr4,Atp2b4,Mest
GO:0009605	response to external stimulus	13	1742	0.34	0.0421	1.37572	10090.ENSMUSP00000019290,10090.ENSMUSP00000025523,10090.ENSMUSP00000034230,10090.ENSMUSP00000052014,10090.ENSMUSP00000054389,10090.ENSMUSP00000055797,10090.ENSMUSP00000064536,10090.ENSMUSP00000064680,10090.ENSMUSP00000079100,10090.ENSMUSP00000101060,10090.ENSMUSP00000104932,10090.ENSMUSP00000124052,10090.ENSMUSP00000138523	Cacng2,Csf1r,Cx3cl1,Tenm2,Nov,Cnr1,Gja1,Junb,Slc1a2,Adora2a,Shank3,Reln,Bin2
GO:0023051	regulation of signaling	21	2858	0.33	0.0055	2.25964	10090.ENSMUSP00000004076,10090.ENSMUSP00000019290,10090.ENSMUSP00000022819,10090.ENSMUSP00000025110,10090.ENSMUSP00000025523,10090.ENSMUSP00000031278,10090.ENSMUSP00000034230,10090.ENSMUSP00000037255,10090.ENSMUSP00000054389,10090.ENSMUSP00000055797,10090.ENSMUSP00000064536,10090.ENSMUSP00000068529,10090.ENSMUSP00000069429,10090.ENSMUSP00000080038,10090.ENSMUSP00000099952,10090.ENSMUSP00000101060…	Grm3,Cacng2,Jph4,Syt4,Csf1r,Bmp3,Cx3cl1,Grm1,Nov,Cnr1,Gja1,Tgfb1i1,Syp,Syngap1,Camk2a,Adora2a,Hipk4,Shank3,Sstr4,Atp2b4,Reln
GO:0051716	cellular response to stimulus	33	4588	0.32	8.21e-05	4.08566	10090.ENSMUSP00000004076,10090.ENSMUSP00000020706,10090.ENSMUSP00000020707,10090.ENSMUSP00000023057,10090.ENSMUSP00000025523,10090.ENSMUSP00000026133,10090.ENSMUSP00000031278,10090.ENSMUSP00000034230,10090.ENSMUSP00000037255,10090.ENSMUSP00000040548,10090.ENSMUSP00000052014,10090.ENSMUSP00000052306,10090.ENSMUSP00000054389,10090.ENSMUSP00000055797,10090.ENSMUSP00000063276,10090.ENSMUSP00000064536…	Grm3,Adcy1,Gabra1,Nptxr,Csf1r,Pycr1,Bmp3,Cx3cl1,Grm1,Kcnh3,Tenm2,D3Bwg0562e,Nov,Cnr1,Gabra5,Gja1,Junb,Gabrg3,Tgfb1i1,Syp,Slc1a2,Syngap1,Slc17a7,Gpr88,Prkcg,Camk2a,Adora2a,Anpep,Shank3,Sstr4,Atp2b4,Reln,Bin2
GO:0030154	cell differentiation	22	3105	0.32	0.0059	2.22915	10090.ENSMUSP00000020706,10090.ENSMUSP00000023057,10090.ENSMUSP00000025110,10090.ENSMUSP00000025523,10090.ENSMUSP00000031278,10090.ENSMUSP00000034230,10090.ENSMUSP00000052014,10090.ENSMUSP00000052306,10090.ENSMUSP00000054389,10090.ENSMUSP00000055797,10090.ENSMUSP00000063276,10090.ENSMUSP00000064536,10090.ENSMUSP00000064680,10090.ENSMUSP00000068529,10090.ENSMUSP00000080038,10090.ENSMUSP00000099398…	Adcy1,Nptxr,Syt4,Csf1r,Bmp3,Cx3cl1,Tenm2,D3Bwg0562e,Nov,Cnr1,Gabra5,Gja1,Junb,Tgfb1i1,Syngap1,Cntnap1,Camk2a,Adora2a,Anpep,Shank3,Reln,Spock1
GO:0048731	system development	25	3672	0.3	0.004	2.39794	10090.ENSMUSP00000020706,10090.ENSMUSP00000023057,10090.ENSMUSP00000025110,10090.ENSMUSP00000025523,10090.ENSMUSP00000031278,10090.ENSMUSP00000034230,10090.ENSMUSP00000052014,10090.ENSMUSP00000052306,10090.ENSMUSP00000054389,10090.ENSMUSP00000055797,10090.ENSMUSP00000063276,10090.ENSMUSP00000064536,10090.ENSMUSP00000064680,10090.ENSMUSP00000079100,10090.ENSMUSP00000080038,10090.ENSMUSP00000082489…	Adcy1,Nptxr,Syt4,Csf1r,Bmp3,Cx3cl1,Tenm2,D3Bwg0562e,Nov,Cnr1,Gabra5,Gja1,Junb,Slc1a2,Syngap1,Slc17a7,Prkcg,Cntnap1,Camk2a,Adora2a,Anpep,Shank3,Atp2b4,Reln,Spock1
GO:0032501	multicellular organismal process	34	5177	0.28	0.00029	3.5376	10090.ENSMUSP00000004076,10090.ENSMUSP00000019290,10090.ENSMUSP00000020706,10090.ENSMUSP00000020707,10090.ENSMUSP00000022819,10090.ENSMUSP00000023057,10090.ENSMUSP00000025110,10090.ENSMUSP00000025523,10090.ENSMUSP00000029784,10090.ENSMUSP00000031278,10090.ENSMUSP00000034230,10090.ENSMUSP00000037255,10090.ENSMUSP00000052014,10090.ENSMUSP00000052306,10090.ENSMUSP00000054389,10090.ENSMUSP00000055797…	Grm3,Cacng2,Adcy1,Gabra1,Jph4,Nptxr,Syt4,Csf1r,Celf3,Bmp3,Cx3cl1,Grm1,Tenm2,D3Bwg0562e,Nov,Cnr1,Scn4b,Gabra5,Gja1,Junb,Tgfb1i1,Slc1a2,Syngap1,Slc17a7,Gpr88,Prkcg,Cntnap1,Camk2a,Adora2a,Anpep,Shank3,Atp2b4,Reln,Spock1
GO:0051179	localization	26	3982	0.28	0.005	2.30103	10090.ENSMUSP00000019290,10090.ENSMUSP00000020707,10090.ENSMUSP00000022967,10090.ENSMUSP00000025110,10090.ENSMUSP00000029784,10090.ENSMUSP00000034230,10090.ENSMUSP00000040548,10090.ENSMUSP00000054389,10090.ENSMUSP00000062507,10090.ENSMUSP00000063276,10090.ENSMUSP00000064536,10090.ENSMUSP00000067632,10090.ENSMUSP00000069429,10090.ENSMUSP00000079100,10090.ENSMUSP00000080038,10090.ENSMUSP00000082489…	Cacng2,Gabra1,Kcnv1,Syt4,Celf3,Cx3cl1,Kcnh3,Nov,Scn4b,Gabra5,Gja1,Gabrg3,Syp,Slc1a2,Syngap1,Slc17a7,Kcnj4,Cntnap1,Camk2a,Shank3,Sstr4,Atp2b4,Slc4a4,Reln,Bin2,Spock1
GO:0065009	regulation of molecular function	18	2761	0.28	0.0348	1.45842	10090.ENSMUSP00000004076,10090.ENSMUSP00000019290,10090.ENSMUSP00000020706,10090.ENSMUSP00000025523,10090.ENSMUSP00000031278,10090.ENSMUSP00000034230,10090.ENSMUSP00000037255,10090.ENSMUSP00000054389,10090.ENSMUSP00000055797,10090.ENSMUSP00000062507,10090.ENSMUSP00000064536,10090.ENSMUSP00000080038,10090.ENSMUSP00000099952,10090.ENSMUSP00000101060,10090.ENSMUSP00000104932,10090.ENSMUSP00000119242…	Grm3,Cacng2,Adcy1,Csf1r,Bmp3,Cx3cl1,Grm1,Nov,Cnr1,Scn4b,Gja1,Syngap1,Camk2a,Adora2a,Shank3,Atp2b4,Reln,Spock1
GO:0050896	response to stimulus	37	5819	0.27	0.00017	3.76955	10090.ENSMUSP00000004076,10090.ENSMUSP00000015234,10090.ENSMUSP00000019290,10090.ENSMUSP00000020706,10090.ENSMUSP00000020707,10090.ENSMUSP00000023057,10090.ENSMUSP00000025523,10090.ENSMUSP00000026133,10090.ENSMUSP00000028123,10090.ENSMUSP00000031278,10090.ENSMUSP00000034230,10090.ENSMUSP00000037255,10090.ENSMUSP00000040548,10090.ENSMUSP00000052014,10090.ENSMUSP00000052306,10090.ENSMUSP00000054389…	Grm3,Ptgds,Cacng2,Adcy1,Gabra1,Nptxr,Csf1r,Pycr1,Gad2,Bmp3,Cx3cl1,Grm1,Kcnh3,Tenm2,D3Bwg0562e,Nov,Cnr1,Gabra5,Gja1,Junb,Gabrg3,Tgfb1i1,Syp,Slc1a2,Syngap1,Slc17a7,Gpr88,Prkcg,Camk2a,Adora2a,Anpep,Shank3,Sstr4,Atp2b4,Reln,Mest,Bin2
GO:0007275	multicellular organism development	26	4145	0.26	0.0079	2.10237	10090.ENSMUSP00000020706,10090.ENSMUSP00000023057,10090.ENSMUSP00000025110,10090.ENSMUSP00000025523,10090.ENSMUSP00000031278,10090.ENSMUSP00000034230,10090.ENSMUSP00000052014,10090.ENSMUSP00000052306,10090.ENSMUSP00000054389,10090.ENSMUSP00000055797,10090.ENSMUSP00000063276,10090.ENSMUSP00000064536,10090.ENSMUSP00000064680,10090.ENSMUSP00000068529,10090.ENSMUSP00000079100,10090.ENSMUSP00000080038…	Adcy1,Nptxr,Syt4,Csf1r,Bmp3,Cx3cl1,Tenm2,D3Bwg0562e,Nov,Cnr1,Gabra5,Gja1,Junb,Tgfb1i1,Slc1a2,Syngap1,Slc17a7,Prkcg,Cntnap1,Camk2a,Adora2a,Anpep,Shank3,Atp2b4,Reln,Spock1
GO:0048583	regulation of response to stimulus	20	3215	0.26	0.0339	1.4698	10090.ENSMUSP00000019290,10090.ENSMUSP00000025110,10090.ENSMUSP00000025523,10090.ENSMUSP00000026133,10090.ENSMUSP00000031278,10090.ENSMUSP00000034230,10090.ENSMUSP00000037255,10090.ENSMUSP00000054389,10090.ENSMUSP00000055797,10090.ENSMUSP00000064536,10090.ENSMUSP00000068529,10090.ENSMUSP00000069429,10090.ENSMUSP00000080038,10090.ENSMUSP00000097874,10090.ENSMUSP00000101060,10090.ENSMUSP00000103990…	Cacng2,Syt4,Csf1r,Pycr1,Bmp3,Cx3cl1,Grm1,Nov,Cnr1,Gja1,Tgfb1i1,Syp,Syngap1,Prkcg,Adora2a,Hipk4,Shank3,Sstr4,Atp2b4,Reln
GO:0065007	biological regulation	47	9079	0.18	0.00027	3.56864	10090.ENSMUSP00000004076,10090.ENSMUSP00000015234,10090.ENSMUSP00000019290,10090.ENSMUSP00000020706,10090.ENSMUSP00000020707,10090.ENSMUSP00000022819,10090.ENSMUSP00000022967,10090.ENSMUSP00000023057,10090.ENSMUSP00000025110,10090.ENSMUSP00000025523,10090.ENSMUSP00000026133,10090.ENSMUSP00000028123,10090.ENSMUSP00000029784,10090.ENSMUSP00000031278,10090.ENSMUSP00000034230,10090.ENSMUSP00000036710…	Grm3,Ptgds,Cacng2,Adcy1,Gabra1,Jph4,Kcnv1,Nptxr,Syt4,Csf1r,Pycr1,Gad2,Celf3,Bmp3,Cx3cl1,Lars2,Grm1,Kcnh3,Tenm2,D3Bwg0562e,Nov,Cnr1,Scn4b,Gabra5,Gja1,Junb,Gabrg3,Tgfb1i1,Syp,Slc1a2,Syngap1,Slc17a7,Gpr88,Kcnj4,Prkcg,Cntnap1,Camk2a,Adora2a,Anpep,Hipk4,Shank3,Sstr4,Atp2b4,Slc4a4,Reln,Mest,Spock1
GO:0050789	regulation of biological process	43	8571	0.17	0.0035	2.45593	10090.ENSMUSP00000004076,10090.ENSMUSP00000015234,10090.ENSMUSP00000019290,10090.ENSMUSP00000020706,10090.ENSMUSP00000020707,10090.ENSMUSP00000022819,10090.ENSMUSP00000022967,10090.ENSMUSP00000023057,10090.ENSMUSP00000025110,10090.ENSMUSP00000025523,10090.ENSMUSP00000026133,10090.ENSMUSP00000029784,10090.ENSMUSP00000031278,10090.ENSMUSP00000034230,10090.ENSMUSP00000037255,10090.ENSMUSP00000040548…	Grm3,Ptgds,Cacng2,Adcy1,Gabra1,Jph4,Kcnv1,Nptxr,Syt4,Csf1r,Pycr1,Celf3,Bmp3,Cx3cl1,Grm1,Kcnh3,Tenm2,D3Bwg0562e,Nov,Cnr1,Scn4b,Gabra5,Gja1,Junb,Gabrg3,Tgfb1i1,Syp,Slc1a2,Syngap1,Slc17a7,Gpr88,Kcnj4,Prkcg,Camk2a,Adora2a,Anpep,Hipk4,Shank3,Sstr4,Atp2b4,Reln,Mest,Spock1
GO:0050794	regulation of cellular process	38	8082	0.14	0.0349	1.45717	10090.ENSMUSP00000004076,10090.ENSMUSP00000015234,10090.ENSMUSP00000019290,10090.ENSMUSP00000020706,10090.ENSMUSP00000020707,10090.ENSMUSP00000022819,10090.ENSMUSP00000023057,10090.ENSMUSP00000025110,10090.ENSMUSP00000025523,10090.ENSMUSP00000026133,10090.ENSMUSP00000029784,10090.ENSMUSP00000031278,10090.ENSMUSP00000034230,10090.ENSMUSP00000037255,10090.ENSMUSP00000040548,10090.ENSMUSP00000052014…	Grm3,Ptgds,Cacng2,Adcy1,Gabra1,Jph4,Nptxr,Syt4,Csf1r,Pycr1,Celf3,Bmp3,Cx3cl1,Grm1,Kcnh3,Tenm2,D3Bwg0562e,Nov,Cnr1,Gabra5,Gja1,Junb,Gabrg3,Tgfb1i1,Syp,Syngap1,Slc17a7,Gpr88,Prkcg,Camk2a,Adora2a,Anpep,Hipk4,Shank3,Sstr4,Atp2b4,Reln,Spock1
GO:0009987	cellular process	49	11206	0.11	0.0107	1.97062	10090.ENSMUSP00000004076,10090.ENSMUSP00000015234,10090.ENSMUSP00000019290,10090.ENSMUSP00000020706,10090.ENSMUSP00000020707,10090.ENSMUSP00000022967,10090.ENSMUSP00000023057,10090.ENSMUSP00000025110,10090.ENSMUSP00000025523,10090.ENSMUSP00000026133,10090.ENSMUSP00000028123,10090.ENSMUSP00000029784,10090.ENSMUSP00000031278,10090.ENSMUSP00000034230,10090.ENSMUSP00000036710,10090.ENSMUSP00000037255…	Grm3,Ptgds,Cacng2,Adcy1,Gabra1,Kcnv1,Nptxr,Syt4,Csf1r,Pycr1,Gad2,Celf3,Bmp3,Cx3cl1,Lars2,Grm1,Npl,Kcnh3,Tenm2,D3Bwg0562e,Nov,Cnr1,Scn4b,Gabra5,Gja1,Junb,Gabrg3,Tgfb1i1,Syp,Slc1a2,Syngap1,Pgm2l1,Slc17a7,Gpr88,Kcnj4,Prkcg,Cntnap1,Camk2a,Adora2a,Anpep,Hipk4,Shank3,Sstr4,Atp2b4,Slc4a4,Dlgap2,Reln,Bin2,Spock1

## Sheet: Microglia_downregulated
#term ID	term description	observed gene count	background gene count	strength	false discovery rate	-LOG10(fdr)	matching proteins in your network (IDs)	matching proteins in your network (labels)
GO:0008380	RNA splicing	11	299	0.86	0.00098	3.00877	10090.ENSMUSP00000021062,10090.ENSMUSP00000021381,10090.ENSMUSP00000023918,10090.ENSMUSP00000032088,10090.ENSMUSP00000044677,10090.ENSMUSP00000076989,10090.ENSMUSP00000077019,10090.ENSMUSP00000105216,10090.ENSMUSP00000112953,10090.ENSMUSP00000119065,10090.ENSMUSP00000120595	Ddx5,Pnn,Ivns1abp,Zfml,Thoc2,Hnrnph1,Prpf4b,Rbm39,Prpf39,Srsf6,Srsf1
GO:0071559	response to transforming growth factor beta	7	133	1.01	0.0073	2.13668	10090.ENSMUSP00000007757,10090.ENSMUSP00000017920,10090.ENSMUSP00000020904,10090.ENSMUSP00000034026,10090.ENSMUSP00000069549,10090.ENSMUSP00000086716,10090.ENSMUSP00000140112	Tgfbr1,Crk,Rock2,Hpgd,Rock1,Usp9x,Creb1
GO:0050794	regulation of cellular process	60	8132	0.16	0.0295	1.53018	10090.ENSMUSP00000001825,10090.ENSMUSP00000002502,10090.ENSMUSP00000004051,10090.ENSMUSP00000006912,10090.ENSMUSP00000007757,10090.ENSMUSP00000013693,10090.ENSMUSP00000015877,10090.ENSMUSP00000015901,10090.ENSMUSP00000017629,10090.ENSMUSP00000017821,10090.ENSMUSP00000017920,10090.ENSMUSP00000020238,10090.ENSMUSP00000020755,10090.ENSMUSP00000020904,10090.ENSMUSP00000020931,10090.ENSMUSP00000021062…	Chordc1,Hltf,Hlf,Pip4k2a,Tgfbr1,Commd8,Capza2,Ppil4,Top2b,Wsb1,Crk,Hsp90b1,Smek2,Rock2,Smc6,Ddx5,Pnn,Dek,Eif4a2,Ivns1abp,Stk17b,Zfml,Cnbp,Nav3,Smg1,Dock11,Hpgd,Clk1,Esf1,Parp14,Pcm1,Thoc2,Akap9,Hook3,Sltm,Nipbl,Rock1,Hnrnph1,Dock10,Scoc,Usp9x,Mtus1,Slc7a2,Rbm39,Arid4b,Arhgap5,Mga,Ccr5,Cfh,Atrx,Tpr,Srsf6,Macf1,Srsf1,Tmem170b,Ptprc,Arhgap12,Kctd12,Creb1,Ash1l

## Sheet: Astrocyte_upregulated
#term ID	term description	observed gene count	background gene count	strength	false discovery rate		matching proteins in your network (IDs)	matching proteins in your network (labels)
GO:0032879	regulation of localization	15	2395	0.53	0.0101	1.99568	10090.ENSMUSP00000000329,10090.ENSMUSP00000000769,10090.ENSMUSP00000007799,10090.ENSMUSP00000017488,10090.ENSMUSP00000017590,10090.ENSMUSP00000022051,10090.ENSMUSP00000039709,10090.ENSMUSP00000048978,10090.ENSMUSP00000056668,10090.ENSMUSP00000064691,10090.ENSMUSP00000079613,10090.ENSMUSP00000106353,10090.ENSMUSP00000119600,10090.ENSMUSP00000131010,10090.ENSMUSP00000134402	Alox12,Serpinf1,Cav1,Vtn,C1qtnf1,Nkd2,Pcm1,Ccdc88a,Igf1,Gfap,Cdh3,Arhgap5,Macf1,Sphk1,Nrxn1
